# Supplementary material for: MicroRNA-26b-5p Inhibits Mouse Liver Fibrogenesis and Angiogenesis by Targeting PDGF Receptor-Beta
Source: PubMed Central journal article supplement (PMC6426711; doi:10.1016/j.omtn.2019.02.014), 2019-02-26
Supplement: mmc1.pdf [file mmc1.pdf]

**OMTN, Volume 16**

**Supplemental Information**

**MicroRNA-26b-5p Inhibits Mouse Liver**

**Fibrogenesis and Angiogenesis**

**by Targeting PDGF Receptor-Beta**

**Le Yang, Chengbin Dong, Jingjing Yang, Lin Yang, Na Chang, Changbo Qi, and Liying Li**

**MicroRNA-26b-5p Inhibits Mouse Liver Fibrogenesis and Angiogenesis by Targeting PDGF Receptor-beta**  
 Le Yang#, Chengbin Dong#, Jingjing Yang, Lin Yang, Na Chang, Changbo Qi, Liying Li\*

**Supplementary table 1. The preliminary probe signal values of noncoding genes by microarray analysis in TGF- $\beta$ 1-treated BMSCs with or without miR-26b-5p mimics**

| Probe Set ID      | Gene Symbol                                                                 | Control mimics |          |          | miR-26b-5p mimics |          |          |
|-------------------|-----------------------------------------------------------------------------|----------------|----------|----------|-------------------|----------|----------|
|                   |                                                                             | 1              | 2        | 3        | 4                 | 5        | 6        |
| TC1500001514.mm.1 |                                                                             | 230.69         | 250.19   | 247.64   | 70.37             | 76.40    | 78.10    |
| TC0100000997.mm.1 |                                                                             | 297.11         | 297.11   | 311.24   | 97.50             | 86.92    | 97.61    |
| TC0500000573.mm.1 |                                                                             | 297.11         | 297.11   | 311.24   | 97.50             | 86.92    | 97.61    |
| TC0100001693.mm.1 | Gm24405                                                                     | 419.99         | 411.72   | 429.19   | 207.22            | 210.06   | 222.38   |
| TC1200001192.mm.1 | Mirg; Mir134; Mir377;<br>Mir382; Mir410; Mir412;<br>Mir485; Mir369; Mir668; | 77.83          | 80.06    | 74.45    | 42.75             | 40.62    | 41.20    |
| TC0900000895.mm.1 | 9530091C08Rik                                                               | 64.33          | 68.73    | 67.72    | 30.32             | 31.79    | 28.82    |
| TC0900000037.mm.1 |                                                                             | 24.30          | 25.61    | 24.76    | 15.59             | 14.81    | 15.49    |
| TC1300000114.mm.1 |                                                                             | 5402.02        | 6162.90  | 5284.89  | 1531.62           | 1397.55  | 1624.13  |
| TC1900000001.mm.1 |                                                                             | 705.19         | 746.21   | 797.75   | 322.89            | 295.37   | 314.01   |
| TC1200001140.mm.1 |                                                                             | 1595.87        | 1853.22  | 1518.92  | 419.92            | 435.33   | 472.59   |
| TC1000000100.mm.1 | Hivep2; Gm20114                                                             | 227.56         | 221.53   | 209.93   | 126.04            | 131.92   | 132.95   |
| TC1200001142.mm.1 | Rian; AF357355; AF357359;<br>AF357425; DQ267100;<br>DQ267101                | 434.72         | 443.68   | 405.31   | 159.07            | 158.44   | 182.66   |
| TC1200001147.mm.1 | Gm24564                                                                     | 7080.00        | 9285.74  | 7676.71  | 1607.60           | 1286.07  | 1491.24  |
| TC0400001968.mm.1 | Mir34a                                                                      | 110.29         | 109.95   | 110.61   | 78.12             | 72.03    | 74.69    |
| TC1200001127.mm.1 | Meg3; Mir770; Mir1906-1;<br>Mir1906-2                                       | 100.49         | 109.20   | 94.60    | 49.75             | 50.49    | 51.74    |
| TC0100002623.mm.1 | Gm26263                                                                     | 50.98          | 58.13    | 54.71    | 29.75             | 28.84    | 29.12    |
| TC1400001518.mm.1 |                                                                             | 70.77          | 69.18    | 70.45    | 43.08             | 44.49    | 40.11    |
| TC1700000133.mm.1 |                                                                             | 225.37         | 235.43   | 200.93   | 95.76             | 86.21    | 91.19    |
| TC0X00003297.mm.1 |                                                                             | 37.44          | 40.44    | 40.99    | 23.43             | 21.92    | 23.20    |
| TC0100002692.mm.1 |                                                                             | 253.47         | 290.16   | 268.96   | 137.16            | 135.94   | 127.28   |
| TC0400002815.mm.1 |                                                                             | 1922.80        | 1990.24  | 1784.36  | 526.89            | 463.25   | 603.38   |
| TC0400002648.mm.1 |                                                                             | 24060.48       | 23960.61 | 24807.40 | 16088.47          | 15517.19 | 14641.79 |
| TC0200003225.mm.1 | Gm13371; RP23-475B13.4                                                      | 78.28          | 79.72    | 78.80    | 55.49             | 52.72    | 57.34    |
| TC1300002482.mm.1 |                                                                             | 296.21         | 299.38   | 285.51   | 183.85            | 167.79   | 185.13   |
| TC1100001296.mm.1 |                                                                             | 43.83          | 39.60    | 39.29    | 24.43             | 23.19    | 23.55    |
| TC1700002272.mm.1 |                                                                             | 13716.81       | 13730.62 | 13957.80 | 8431.19           | 8492.53  | 7580.17  |
| TC0800002911.mm.1 |                                                                             | 14012.21       | 14997.21 | 15199.95 | 9867.14           | 9356.19  | 9754.39  |
| TC0X00000514.mm.1 | 1600025M17Rik                                                               | 19.05          | 19.38    | 18.49    | 13.76             | 14.31    | 13.47    |
| TC0600002863.mm.1 |                                                                             | 95.56          | 108.35   | 105.21   | 30.48             | 38.77    | 32.93    |
| TC0X00002854.mm.1 | Gm23322                                                                     | 88.37          | 96.86    | 93.01    | 63.90             | 61.76    | 62.92    |
| TC0400002965.mm.1 |                                                                             | 64.49          | 71.07    | 78.45    | 27.53             | 29.78    | 26.02    |
| TC1200000136.mm.1 |                                                                             | 413.67         | 478.85   | 440.42   | 214.78            | 235.18   | 224.70   |
| TC0100001475.mm.1 | Dnm3os; Mir214; Mir199a-2                                                   | 543.23         | 638.68   | 565.42   | 259.14            | 225.31   | 249.34   |
| TC1800000033.mm.1 |                                                                             | 70.61          | 69.42    | 81.68    | 26.49             | 21.03    | 23.84    |
| TC1300000169.mm.1 |                                                                             | 30852.82       | 31506.72 | 28817.49 | 19832.40          | 19429.05 | 18451.71 |
| TC0400002967.mm.1 |                                                                             | 113.51         | 120.12   | 105.75   | 35.14             | 40.50    | 44.72    |
| TC0700000086.mm.1 | Peg3os                                                                      | 59.73          | 59.97    | 61.99    | 45.41             | 42.21    | 44.29    |
| TC1800000752.mm.1 |                                                                             | 48.31          | 51.66    | 51.03    | 29.66             | 27.09    | 30.60    |
| TC1400002790.mm.1 | 2610042L04Rik                                                               | 38.07          | 36.76    | 37.88    | 28.26             | 28.05    | 26.43    |
| TC0X00000785.mm.1 | Gm14749                                                                     | 737.84         | 658.73   | 637.60   | 367.58            | 342.91   | 338.88   |
| TC0800000940.mm.1 |                                                                             | 211.70         | 219.90   | 230.70   | 129.86            | 139.95   | 125.90   |
| TC1800000524.mm.1 |                                                                             | 308.16         | 359.97   | 328.82   | 163.21            | 161.55   | 177.37   |
| TC1800000745.mm.1 |                                                                             | 28.73          | 29.89    | 30.12    | 24.26             | 23.63    | 23.64    |
| TC1100000241.mm.1 |                                                                             | 59.94          | 65.04    | 62.39    | 44.23             | 42.37    | 44.56    |
| TC1100002345.mm.1 |                                                                             | 25.66          | 24.23    | 25.68    | 17.69             | 16.35    | 17.39    |
| TC0100000398.mm.1 | Gm10561                                                                     | 96.46          | 93.90    | 97.61    | 60.30             | 54.19    | 61.06    |
| TC0200001941.mm.1 |                                                                             | 26.60          | 26.50    | 27.23    | 20.18             | 18.54    | 19.32    |
| TC1200000732.mm.1 |                                                                             | 26.39          | 26.09    | 27.57    | 20.67             | 19.74    | 19.73    |
| TC0600000333.mm.1 |                                                                             | 92.31          | 86.05    | 83.00    | 36.68             | 40.92    | 44.05    |
| TC0200001793.mm.1 | Gm14087; RP23-158L6.1                                                       | 832.04         | 754.04   | 704.62   | 404.65            | 415.67   | 418.35   |
| TC1500001292.mm.1 |                                                                             | 45.05          | 44.02    | 41.66    | 21.94             | 22.43    | 18.89    |
| TC0900002256.mm.1 |                                                                             | 79.86          | 87.74    | 91.86    | 29.79             | 37.33    | 32.66    |
| TC0100003023.mm.1 |                                                                             | 82.13          | 78.47    | 76.95    | 56.51             | 59.52    | 58.86    |
| TC1500001517.mm.1 |                                                                             | 135.21         | 159.71   | 161.30   | 71.39             | 63.53    | 66.69    |
| TC0900000898.mm.1 | F830001A07Rik                                                               | 188.48         | 262.53   | 209.40   | 50.86             | 61.33    | 55.39    |
| TC0300003210.mm.1 | Schip1; Gm21949                                                             | 164.04         | 167.99   | 166.09   | 112.24            | 123.13   | 114.44   |
| TC0300001589.mm.1 | Wls                                                                         | 4151.20        | 4218.31  | 3953.19  | 2671.50           | 2426.76  | 2677.41  |
| TC1700001305.mm.1 |                                                                             | 133.84         | 150.12   | 134.79   | 85.98             | 84.71    | 88.55    |
| TC0100000065.mm.1 |                                                                             | 176.46         | 177.99   | 201.03   | 67.26             | 50.01    | 55.05    |
| TC1300002720.mm.1 |                                                                             | 22758.57       | 22848.36 | 21123.59 | 14518.77          | 15237.41 | 14058.07 |
| TC0200001610.mm.1 |                                                                             | 26159.70       | 26944.01 | 24810.32 | 15348.40          | 14678.51 | 16550.52 |
| TC0200003052.mm.1 |                                                                             | 34.02          | 33.49    | 33.53    | 26.96             | 25.11    | 26.17    |
| TC0500003696.mm.1 |                                                                             | 38.00          | 35.06    | 40.11    | 20.19             | 17.72    | 19.70    |
| TC0X00002290.mm.1 | Gm14889; RP23-303A21.2                                                      | 439.81         | 405.13   | 427.79   | 257.48            | 278.07   | 281.81   |
| TC0X00002908.mm.1 | Gm14929; RP23-79L4.1                                                        | 60.75          | 60.86    | 57.81    | 45.83             | 45.61    | 47.58    |

|                   |                        |           |           |           |          |          |          |
|-------------------|------------------------|-----------|-----------|-----------|----------|----------|----------|
| TC1100003458.mm.1 |                        | 171.37    | 172.08    | 158.51    | 62.02    | 78.33    | 65.31    |
| TC0200005100.mm.1 | Gm14265; RP23-161B3.4  | 835.09    | 838.23    | 823.53    | 598.12   | 569.27   | 626.04   |
| TC1500001801.mm.1 |                        | 23.23     | 22.11     | 21.69     | 15.01    | 15.58    | 16.22    |
| TC1100003621.mm.1 | 2010300F17Rik          | 164.90    | 151.24    | 131.66    | 63.00    | 55.81    | 62.85    |
| TC0X00002541.mm.1 | Gm14737; RP23-461P10.1 | 2673.64   | 2639.65   | 2397.64   | 1515.26  | 1374.72  | 1521.05  |
| TC0400000474.mm.1 |                        | 117.68    | 141.67    | 119.92    | 45.17    | 51.96    | 41.82    |
| TC1400000035.mm.1 | Gm10410                | 40.01     | 39.61     | 39.13     | 28.78    | 28.79    | 26.36    |
| TC0700004076.mm.1 | St5                    | 539.11    | 513.76    | 508.49    | 317.49   | 289.32   | 331.93   |
| TC0600002441.mm.1 | Rprl1                  | 45.07     | 46.50     | 44.97     | 36.23    | 35.28    | 33.84    |
| TC0200003757.mm.1 |                        | 64.22     | 57.48     | 56.85     | 32.96    | 32.00    | 28.81    |
| TC0600002004.mm.1 |                        | 114.30    | 115.51    | 111.75    | 82.28    | 73.75    | 78.18    |
| TC1500000454.mm.1 | Pvt1                   | 61.72     | 66.37     | 63.15     | 50.00    | 49.24    | 49.73    |
| TC0900000103.mm.1 |                        | 2029.88   | 2132.65   | 2060.93   | 1166.33  | 1177.51  | 1336.78  |
| TC1100001298.mm.1 |                        | 19.14     | 21.28     | 20.18     | 13.62    | 14.19    | 13.66    |
| TC0700004432.mm.1 |                        | 47.17     | 47.60     | 46.49     | 31.29    | 27.04    | 29.74    |
| TC0800002077.mm.1 |                        | 121.27    | 131.96    | 134.66    | 64.60    | 53.60    | 51.77    |
| TC0800002352.mm.1 |                        | 75.54     | 76.47     | 61.80     | 31.39    | 32.19    | 33.64    |
| TC1000002312.mm.1 |                        | 123.10    | 145.27    | 123.57    | 70.44    | 66.26    | 70.74    |
| TC0100003495.mm.1 |                        | 52.57     | 68.43     | 57.25     | 24.83    | 24.83    | 22.63    |
| TC0100003492.mm.1 |                        | 32.58     | 31.88     | 35.12     | 22.41    | 23.62    | 22.10    |
| TC1200001163.mm.1 | Gm22205                | 301.06    | 410.04    | 287.58    | 86.64    | 72.75    | 90.77    |
| TC1200002055.mm.1 |                        | 638.64    | 651.61    | 706.64    | 437.61   | 412.15   | 451.07   |
| TC0200003714.mm.1 |                        | 88.65     | 95.59     | 90.90     | 59.47    | 63.12    | 65.65    |
| TC0200004609.mm.1 | Gm14043; RP23-358G23.3 | 3022.81   | 3086.53   | 2910.22   | 1626.56  | 1636.28  | 1899.66  |
| TC0600000011.mm.1 |                        | 14972.22  | 15699.23  | 13926.29  | 4319.52  | 3344.05  | 4993.45  |
| TC1300001916.mm.1 |                        | 47.06     | 55.84     | 51.04     | 30.77    | 30.12    | 30.57    |
| TC1200000191.mm.1 |                        | 32.99     | 29.95     | 29.62     | 20.89    | 19.27    | 19.89    |
| TC0600003013.mm.1 |                        | 59.97     | 53.61     | 53.18     | 30.79    | 31.99    | 34.67    |
| TC1200001150.mm.1 | Gm23600                | 372.04    | 391.39    | 376.69    | 124.25   | 121.99   | 165.55   |
| TC1000001342.mm.1 |                        | 2436.85   | 2413.65   | 2363.78   | 1505.64  | 1270.77  | 1277.40  |
| TC1700000011.mm.1 |                        | 40.09     | 44.97     | 41.76     | 28.68    | 29.90    | 29.36    |
| TC0200004345.mm.1 |                        | 359.35    | 295.55    | 298.05    | 81.55    | 114.45   | 96.72    |
| TC0400000848.mm.1 | Gm12415; RP23-229A22.3 | 38.08     | 34.25     | 34.29     | 21.92    | 22.82    | 20.34    |
| TC0200005293.mm.1 |                        | 346.36    | 353.04    | 296.26    | 183.31   | 174.31   | 163.98   |
| TC1100002093.mm.1 |                        | 87.32     | 74.78     | 84.48     | 46.42    | 49.57    | 44.71    |
| TC1700002390.mm.1 | 4930405O22Rik          | 43.41     | 47.05     | 40.60     | 27.89    | 28.70    | 27.91    |
| TC0X00003095.mm.1 | Gm5762                 | 100.15    | 102.12    | 92.66     | 63.31    | 69.30    | 65.75    |
| TC1300001172.mm.1 |                        | 5693.97   | 8504.95   | 6473.52   | 1818.52  | 1707.28  | 2050.05  |
| TC0100000432.mm.1 |                        | 6028.10   | 6232.70   | 5292.36   | 3382.94  | 3080.46  | 3355.73  |
| TC0600000098.mm.1 |                        | 23091.12  | 22983.56  | 22102.19  | 15106.07 | 12921.21 | 14338.66 |
| TC0100002366.mm.1 | Gm23943                | 25461.78  | 28351.28  | 29138.19  | 17136.23 | 17121.93 | 18215.65 |
| TC0600002766.mm.1 |                        | 38.12     | 42.37     | 37.62     | 20.41    | 16.17    | 18.55    |
| TC0400000200.mm.1 |                        | 14118.35  | 15428.98  | 14730.02  | 10624.54 | 11121.18 | 10397.85 |
| TC0900001160.mm.1 | Gm22866                | 12140.99  | 11174.31  | 13715.38  | 5605.33  | 4383.93  | 4749.17  |
| TC0200001689.mm.1 |                        | 53.23     | 53.03     | 58.17     | 40.16    | 38.59    | 40.11    |
| TC1300001772.mm.1 | Gm6093                 | 82.55     | 86.05     | 74.65     | 40.30    | 33.53    | 40.93    |
| TC0900000594.mm.1 | Gm11149                | 36.13     | 34.92     | 33.65     | 27.35    | 25.60    | 26.51    |
| TC0800000442.mm.1 |                        | 51.84     | 58.82     | 55.84     | 38.90    | 37.18    | 37.73    |
| TC1900001690.mm.1 |                        | 3994.29   | 4231.43   | 3804.16   | 2347.01  | 2158.73  | 1926.08  |
| TC0600002832.mm.1 | Gm20705; RP23-333F8.1  | 45.54     | 53.73     | 41.64     | 22.87    | 22.70    | 21.89    |
| TC1600002113.mm.1 |                        | 32.48     | 30.63     | 30.84     | 24.38    | 22.44    | 23.34    |
| TC0100001499.mm.1 | Gm16588                | 334.00    | 377.05    | 332.18    | 183.80   | 169.57   | 147.21   |
| TC0400000475.mm.1 |                        | 107.68    | 137.97    | 129.12    | 51.08    | 53.31    | 59.30    |
| TC1300001236.mm.1 |                        | 30.21     | 37.13     | 35.70     | 18.91    | 18.68    | 18.83    |
| TC1500000092.mm.1 |                        | 121.29    | 135.96    | 126.37    | 53.09    | 47.86    | 63.82    |
| TC0X00001711.mm.1 |                        | 74.81     | 78.87     | 91.15     | 47.16    | 46.04    | 46.26    |
| TC0X00000746.mm.1 | Gm15384; RP23-252K7.9  | 1314.09   | 1419.99   | 1398.90   | 1042.59  | 973.95   | 957.55   |
| TC0300001277.mm.1 |                        | 88.41     | 99.21     | 90.48     | 66.99    | 64.20    | 64.90    |
| TC0300000911.mm.1 |                        | 14.29     | 13.96     | 15.34     | 9.56     | 10.11    | 10.51    |
| TC1500002068.mm.1 |                        | 25.21     | 25.54     | 26.02     | 19.04    | 17.14    | 18.97    |
| TC1200001152.mm.1 | Gm25357                | 308.21    | 290.33    | 213.99    | 89.94    | 80.06    | 72.13    |
| TC1100000447.mm.1 |                        | 111.49    | 132.59    | 112.37    | 61.35    | 64.31    | 68.78    |
| TC1500001209.mm.1 |                        | 73.63     | 63.66     | 69.15     | 45.00    | 40.47    | 42.15    |
| TC0900000087.mm.1 |                        | 62.43     | 75.02     | 74.22     | 41.02    | 39.66    | 40.55    |
| TC1200001185.mm.1 | Mir376a                | 94.17     | 88.60     | 105.11    | 40.86    | 50.58    | 47.11    |
| TC0X00000583.mm.1 | Gm24598                | 5755.15   | 4652.04   | 5125.98   | 1596.16  | 976.25   | 1270.55  |
| TC0400002734.mm.1 |                        | 180.37    | 169.30    | 151.57    | 82.52    | 78.56    | 94.14    |
| TC1100001699.mm.1 | Gm22683                | 28.92     | 27.84     | 29.28     | 21.47    | 21.94    | 19.85    |
| TC1500000456.mm.1 |                        | 84.92     | 83.74     | 80.37     | 53.18    | 60.45    | 53.96    |
| TC0200001270.mm.1 |                        | 22106.90  | 21873.74  | 22305.20  | 14508.99 | 12615.49 | 11907.08 |
| TC0300001384.mm.1 |                        | 42.42     | 47.52     | 38.59     | 25.01    | 24.66    | 24.33    |
| TC1300001559.mm.1 |                        | 7463.48   | 7415.57   | 7951.38   | 5710.79  | 5674.91  | 5249.23  |
| TC0700001104.mm.1 |                        | 2459.37   | 2685.55   | 2828.73   | 1591.75  | 1387.48  | 1595.40  |
| TC1500001157.mm.1 |                        | 108363.10 | 119628.90 | 104092.80 | 73339.27 | 66591.32 | 66400.46 |
| TC0400004056.mm.1 |                        | 27.52     | 30.84     | 27.04     | 16.68    | 15.61    | 18.05    |
| TC0300002359.mm.1 | Gm24046                | 747.99    | 690.10    | 807.45    | 399.86   | 365.04   | 438.19   |
| TC0600000305.mm.1 | Plxna4os1              | 17.88     | 17.86     | 16.20     | 11.53    | 10.77    | 12.04    |
| TC0500002961.mm.1 | Gm5871                 | 727.66    | 760.55    | 711.88    | 566.05   | 596.25   | 560.82   |
| TC0800000524.mm.1 | Gm15878                | 286.60    | 291.37    | 329.16    | 168.45   | 136.54   | 157.10   |
| TC1300001904.mm.1 |                        | 2276.20   | 2235.82   | 2235.10   | 1568.42  | 1329.15  | 1365.44  |

|                   |                        |          |          |          |          |          |          |
|-------------------|------------------------|----------|----------|----------|----------|----------|----------|
| TC0900000557.mm.1 |                        | 23.40    | 21.39    | 22.62    | 16.33    | 17.40    | 16.95    |
| TC0300002757.mm.1 | Gm12521; RP23-316M11.3 | 1497.12  | 1418.01  | 1393.70  | 889.82   | 803.32   | 956.04   |
| TC0X00002593.mm.1 | Mir1906-1; Mir1906-2   | 84.10    | 84.47    | 94.95    | 53.03    | 44.96    | 51.22    |
| TC1200001709.mm.1 |                        | 52.23    | 51.69    | 47.55    | 32.31    | 28.91    | 33.43    |
| TC0300000388.mm.1 |                        | 47.92    | 61.90    | 61.95    | 24.86    | 20.09    | 22.25    |
| TC1500001498.mm.1 |                        | 497.15   | 693.02   | 555.30   | 220.77   | 245.62   | 230.04   |
| TC0400000974.mm.1 |                        | 33.38    | 37.77    | 35.84    | 19.11    | 21.08    | 17.07    |
| TC1900000087.mm.1 |                        | 157.56   | 137.53   | 118.03   | 34.44    | 44.35    | 48.71    |
| TC0700001905.mm.1 |                        | 1467.79  | 1563.86  | 1538.42  | 1015.08  | 893.30   | 843.47   |
| TC1100000162.mm.1 |                        | 111.45   | 92.21    | 103.82   | 60.54    | 59.79    | 54.66    |
| TC0X00002686.mm.1 | Gm14801; RP23-418O17.1 | 191.85   | 183.87   | 175.11   | 125.52   | 108.51   | 109.10   |
| TC0600000332.mm.1 |                        | 103.21   | 102.45   | 88.55    | 49.67    | 43.78    | 54.18    |
| TC0300001276.mm.1 |                        | 56.65    | 68.11    | 64.30    | 32.52    | 37.45    | 34.62    |
| TC0200003040.mm.1 |                        | 99.48    | 111.33   | 96.70    | 57.95    | 62.93    | 65.99    |
| TC0900003213.mm.1 |                        | 107.87   | 140.68   | 128.12   | 58.52    | 51.85    | 46.94    |
| TC1700002605.mm.1 |                        | 129.34   | 146.61   | 131.52   | 53.94    | 52.06    | 69.33    |
| TC1800000600.mm.1 |                        | 296.75   | 350.48   | 236.57   | 78.05    | 59.17    | 85.91    |
| TC1800000031.mm.1 |                        | 68.52    | 80.54    | 54.07    | 17.89    | 17.06    | 22.70    |
| TC0100001696.mm.1 |                        | 265.74   | 281.14   | 247.32   | 143.90   | 123.68   | 153.49   |
| TC1100000810.mm.1 | Gm12281                | 30.83    | 31.06    | 29.09    | 21.84    | 23.81    | 22.01    |
| TC1500000857.mm.1 | Gm23737                | 205.04   | 194.43   | 222.36   | 107.10   | 103.57   | 83.39    |
| TC0600001583.mm.1 |                        | 119.80   | 118.30   | 122.86   | 84.91    | 83.21    | 93.50    |
| TC1300000437.mm.1 |                        | 111.28   | 126.83   | 105.47   | 70.80    | 66.94    | 64.15    |
| TC0900002258.mm.1 |                        | 91.12    | 105.49   | 97.03    | 29.07    | 39.96    | 40.51    |
| TC0300002981.mm.1 | Gm25042                | 45460.18 | 52096.08 | 48480.46 | 31863.93 | 28509.33 | 31794.86 |
| TC0X00002744.mm.1 |                        | 24.34    | 27.10    | 25.31    | 18.68    | 16.87    | 17.47    |
| TC0300001762.mm.1 |                        | 106.01   | 106.62   | 90.14    | 53.14    | 48.22    | 57.70    |
| TC0600003170.mm.1 | Gm7308                 | 13334.18 | 12351.26 | 13709.41 | 9643.03  | 8917.62  | 9544.99  |
| TC0600001726.mm.1 |                        | 3097.43  | 3010.93  | 2917.35  | 1910.23  | 1974.83  | 1649.57  |
| TC1600001534.mm.1 |                        | 269.35   | 320.66   | 280.01   | 187.91   | 180.82   | 181.99   |
| TC1300002345.mm.1 | Gm24519                | 31.38    | 34.76    | 34.55    | 25.37    | 25.31    | 24.63    |
| TC0X00002483.mm.1 |                        | 29.60    | 31.36    | 28.21    | 21.04    | 19.07    | 21.08    |
| TC0900003202.mm.1 |                        | 489.87   | 595.34   | 494.34   | 312.28   | 295.36   | 303.20   |
| TC1100000209.mm.1 |                        | 171.62   | 217.00   | 194.65   | 110.20   | 102.58   | 98.71    |
| TC1700002606.mm.1 |                        | 35.33    | 40.81    | 36.93    | 20.48    | 23.49    | 23.47    |
| TC1300000079.mm.1 |                        | 48.38    | 50.81    | 50.46    | 33.35    | 37.57    | 33.03    |
| TC1000002513.mm.1 | Gm17151; RP24-121A12.3 | 382.56   | 396.83   | 396.47   | 303.76   | 269.37   | 292.31   |
| TC1100002927.mm.1 |                        | 158.88   | 162.60   | 171.13   | 114.58   | 114.47   | 126.50   |
| TC0X00002206.mm.1 |                        | 710.12   | 635.43   | 594.61   | 371.43   | 300.58   | 312.19   |
| TC0X00000841.mm.1 | Gm14763; RP23-311G7.2  | 800.60   | 882.84   | 780.35   | 535.98   | 521.63   | 581.64   |
| TC1500001513.mm.1 |                        | 190.14   | 281.15   | 183.25   | 58.15    | 53.43    | 69.16    |
| TC0X00001177.mm.1 | Gm14928                | 717.98   | 702.35   | 739.29   | 526.94   | 452.89   | 499.76   |
| TC1900000303.mm.1 |                        | 289.40   | 299.83   | 285.85   | 163.45   | 173.80   | 199.53   |
| TC1100002239.mm.1 |                        | 17212.51 | 17005.76 | 16324.98 | 11786.41 | 10334.50 | 11948.57 |
| TC0300000941.mm.1 | Gm24136                | 3155.58  | 2685.48  | 3193.53  | 1535.69  | 1211.73  | 1499.05  |
| TC1500002178.mm.1 | Gm19664                | 68.67    | 68.53    | 77.51    | 49.79    | 46.11    | 49.71    |
| TC0300000390.mm.1 |                        | 25.15    | 25.61    | 28.58    | 14.43    | 17.04    | 16.19    |
| TC1300000945.mm.1 |                        | 54.33    | 45.45    | 40.57    | 22.96    | 21.25    | 23.47    |
| TC0400000637.mm.1 |                        | 89.46    | 100.05   | 78.03    | 49.77    | 49.27    | 46.12    |
| TC0800002476.mm.1 |                        | 64.52    | 82.98    | 60.38    | 30.45    | 26.49    | 24.23    |
| TC1400002343.mm.1 | Bmp1                   | 8875.67  | 9414.19  | 8020.84  | 5469.55  | 4980.69  | 5694.36  |
| TC1100000122.mm.1 |                        | 4625.91  | 5660.95  | 4613.72  | 2747.41  | 2607.13  | 2889.34  |
| TC0400002814.mm.1 |                        | 284.74   | 355.09   | 261.15   | 76.90    | 83.61    | 114.12   |
| TC0300003112.mm.1 |                        | 4692.71  | 5332.93  | 5182.02  | 3498.33  | 3185.65  | 3041.12  |
| TC1500000149.mm.1 |                        | 13113.53 | 13708.52 | 13010.87 | 8832.27  | 7182.68  | 8276.82  |
| TC0800001304.mm.1 | Gm16349; AC122807.3    | 65.97    | 75.40    | 73.54    | 45.78    | 38.05    | 38.88    |
| TC0900000901.mm.1 | Gm19304                | 41.21    | 41.65    | 40.61    | 26.43    | 29.79    | 30.53    |
| TC0100001323.mm.1 |                        | 131.31   | 138.87   | 122.03   | 83.70    | 68.61    | 76.88    |
| TC1100000089.mm.1 | Gm11402; RP23-198N14.4 | 170.86   | 197.22   | 170.29   | 111.83   | 117.63   | 121.64   |
| TC1300001304.mm.1 |                        | 97.99    | 108.36   | 83.39    | 53.49    | 52.34    | 51.20    |
| TC1300001310.mm.1 |                        | 38.75    | 34.02    | 40.71    | 21.66    | 23.48    | 20.02    |
| TC0200003855.mm.1 | Gm13685                | 2108.75  | 2271.51  | 1996.13  | 1514.00  | 1354.41  | 1452.37  |
| TC1200000196.mm.1 |                        | 148.25   | 135.37   | 157.09   | 87.78    | 99.58    | 94.96    |
| TC0700003882.mm.1 | Gm25171                | 64910.45 | 72899.04 | 74425.13 | 50470.83 | 49682.68 | 47539.17 |
| TC0800000949.mm.1 | Gm25110                | 64910.45 | 72899.04 | 74425.13 | 50470.83 | 49682.68 | 47539.17 |
| TC0800001606.mm.1 | Gm25775                | 64910.45 | 72899.04 | 74425.13 | 50470.83 | 49682.68 | 47539.17 |
| TC1600000569.mm.1 | Gm24795                | 64910.45 | 72899.04 | 74425.13 | 50470.83 | 49682.68 | 47539.17 |
| TC0600000138.mm.1 | ST7-OT4_3              | 121.90   | 110.01   | 122.38   | 81.31    | 88.46    | 83.15    |
| TC1200000213.mm.1 |                        | 37.47    | 35.75    | 33.63    | 25.95    | 26.40    | 27.71    |
| TC0500002514.mm.1 |                        | 93.17    | 108.76   | 93.64    | 59.20    | 65.64    | 61.59    |
| TC0700003533.mm.1 |                        | 18074.41 | 19272.57 | 20921.03 | 11073.85 | 8435.74  | 8931.63  |
| TC1700002604.mm.1 |                        | 126.24   | 152.48   | 111.52   | 62.14    | 55.02    | 62.05    |
| TC0300002663.mm.1 |                        | 35.05    | 39.68    | 39.22    | 24.30    | 24.41    | 20.98    |
| TC1100004162.mm.1 | Gm11747                | 104.58   | 112.46   | 114.01   | 85.80    | 78.97    | 84.26    |
| TC1700001443.mm.1 | D17Ert648e             | 32.73    | 34.25    | 34.23    | 25.24    | 27.61    | 26.99    |
| TC1500000015.mm.1 |                        | 8018.48  | 8246.26  | 8546.57  | 5827.03  | 4964.00  | 5692.72  |
| TC0700001010.mm.1 |                        | 59.59    | 65.75    | 67.73    | 33.04    | 39.81    | 39.12    |
| TC1900000558.mm.1 |                        | 141.83   | 133.74   | 144.79   | 96.10    | 86.71    | 101.12   |
| TC0900000085.mm.1 |                        | 2750.14  | 4063.20  | 4025.16  | 1150.98  | 1343.97  | 1253.01  |
| TC1100000444.mm.1 |                        | 177.80   | 214.17   | 173.99   | 63.35    | 62.83    | 87.55    |

|                   |                                 |          |          |          |          |          |          |
|-------------------|---------------------------------|----------|----------|----------|----------|----------|----------|
| TC1600000636.mm.1 |                                 | 72.59    | 87.05    | 84.64    | 36.77    | 41.31    | 46.42    |
| TC0900000084.mm.1 |                                 | 114.27   | 133.95   | 104.36   | 51.60    | 56.78    | 63.19    |
| TC0200000796.mm.1 |                                 | 104.82   | 117.93   | 101.92   | 68.56    | 57.93    | 56.64    |
| TC0200000789.mm.1 |                                 | 29.80    | 31.27    | 26.94    | 19.59    | 20.05    | 17.95    |
| TC1000001777.mm.1 |                                 | 72.46    | 65.36    | 69.12    | 31.87    | 23.70    | 33.43    |
| TC0900002665.mm.1 |                                 | 4768.70  | 4840.51  | 5007.52  | 3168.90  | 2484.55  | 2835.30  |
| TC0800002478.mm.1 |                                 | 76.58    | 100.01   | 68.94    | 34.79    | 32.01    | 34.86    |
| TC0600002836.mm.1 |                                 | 97.71    | 113.72   | 108.60   | 45.01    | 60.18    | 50.62    |
| TC0600002598.mm.1 |                                 | 18.07    | 22.74    | 20.17    | 12.20    | 12.11    | 12.35    |
| TC1400002190.mm.1 |                                 | 61.40    | 56.09    | 65.15    | 30.62    | 36.22    | 37.14    |
| TC0300000100.mm.1 |                                 | 44.57    | 47.49    | 47.57    | 25.94    | 28.30    | 31.98    |
| TC0300000568.mm.1 | Gm10040                         | 850.73   | 948.77   | 863.16   | 590.62   | 573.71   | 649.97   |
| TC1000001682.mm.1 |                                 | 318.56   | 330.61   | 278.45   | 170.28   | 136.86   | 169.88   |
| TC0900002536.mm.1 |                                 | 89.38    | 99.35    | 82.81    | 60.78    | 55.23    | 57.57    |
| TC0100003705.mm.1 |                                 | 123.35   | 141.42   | 116.86   | 65.09    | 71.97    | 77.89    |
| TC0500002510.mm.1 | Gm23183                         | 46.95    | 54.82    | 45.87    | 29.91    | 27.96    | 31.74    |
| TC1700002609.mm.1 |                                 | 110.71   | 117.88   | 102.84   | 67.18    | 59.50    | 72.21    |
| TC0700004331.mm.1 |                                 | 35.81    | 34.71    | 35.38    | 26.31    | 22.89    | 26.13    |
| TC0900000905.mm.1 |                                 | 44.10    | 34.40    | 38.73    | 21.04    | 22.92    | 20.18    |
| TC1100003198.mm.1 | Pafah1b1                        | 541.80   | 502.71   | 517.21   | 385.65   | 411.44   | 419.95   |
| TC0900000086.mm.1 | Phxr4                           | 547.50   | 656.15   | 490.34   | 186.28   | 136.83   | 213.64   |
| TC1300000436.mm.1 |                                 | 234.19   | 271.66   | 239.83   | 160.32   | 165.47   | 143.88   |
| TC1000001855.mm.1 |                                 | 196.35   | 180.38   | 147.26   | 62.55    | 83.51    | 66.92    |
| TC1600000003.mm.1 | Gm23215                         | 6730.67  | 8227.23  | 6503.87  | 4194.48  | 3814.42  | 4001.16  |
| TC0600002817.mm.1 |                                 | 25.05    | 27.27    | 27.99    | 20.19    | 19.18    | 20.61    |
| TC0600003436.mm.1 | Gm15720                         | 21408.82 | 17844.95 | 21020.40 | 12745.46 | 13318.19 | 12610.91 |
| TC0600002867.mm.1 |                                 | 31.55    | 23.87    | 31.62    | 14.46    | 14.64    | 14.56    |
| TC0500000338.mm.1 | Gm5864                          | 52197.53 | 53667.73 | 50359.19 | 40454.28 | 36247.88 | 40159.38 |
| TC0200001425.mm.1 | Gm13815                         | 321.24   | 342.99   | 355.44   | 256.46   | 245.97   | 267.78   |
| TC1700002448.mm.1 |                                 | 28.06    | 25.06    | 26.33    | 15.61    | 18.55    | 17.32    |
| TC0400002751.mm.1 |                                 | 312.61   | 284.84   | 340.99   | 200.06   | 209.26   | 214.69   |
| TC1200001839.mm.1 |                                 | 73.99    | 69.57    | 71.53    | 49.62    | 54.16    | 46.06    |
| TC0200003105.mm.1 |                                 | 42.26    | 43.87    | 44.21    | 31.36    | 30.87    | 26.71    |
| TC0X00001066.mm.1 |                                 | 82.36    | 72.22    | 94.35    | 46.39    | 47.25    | 43.17    |
| TC0300003072.mm.1 |                                 | 29.56    | 33.42    | 31.55    | 23.01    | 20.56    | 22.51    |
| TC0X00002757.mm.1 | Gm9115                          | 929.60   | 813.86   | 763.67   | 546.07   | 538.38   | 552.78   |
| TC1200001148.mm.1 | Gm24899; Gm26945; RP23-204I16.2 | 32.01    | 37.45    | 38.19    | 23.80    | 24.13    | 23.36    |
| TC1200000363.mm.1 |                                 | 56.01    | 61.89    | 46.71    | 26.75    | 29.60    | 24.73    |
| TC1800000941.mm.1 | Gm16147                         | 253.46   | 269.17   | 279.06   | 158.60   | 134.36   | 170.97   |
| TC0500000264.mm.1 |                                 | 63.52    | 66.91    | 60.71    | 48.04    | 46.46    | 50.75    |
| TC1800000485.mm.1 |                                 | 235.25   | 231.95   | 219.53   | 167.50   | 175.87   | 185.57   |
| TC0100001434.mm.1 | Sec16b                          | 69.98    | 71.49    | 62.12    | 41.00    | 35.99    | 43.88    |
| TC1000001857.mm.1 | Gm26528                         | 82.69    | 83.47    | 75.99    | 61.80    | 56.09    | 54.85    |
| TC1900000245.mm.1 |                                 | 26841.30 | 27860.82 | 28116.31 | 19255.66 | 15858.81 | 18571.42 |
| TC1400001955.mm.1 | Gm23470                         | 142.84   | 143.68   | 133.23   | 83.94    | 61.07    | 69.02    |
| TC0100003755.mm.1 |                                 | 58.12    | 72.56    | 65.93    | 34.97    | 38.61    | 40.22    |
| TC0200000233.mm.1 |                                 | 9143.88  | 10192.84 | 9184.60  | 6907.67  | 6949.25  | 7388.00  |
| TC1200001318.mm.1 |                                 | 84.24    | 89.28    | 73.21    | 53.78    | 49.13    | 47.32    |
| TC0600000334.mm.1 | Gm19966                         | 50.57    | 54.16    | 42.73    | 23.53    | 19.68    | 25.99    |
| TC0800001308.mm.1 |                                 | 26.73    | 24.90    | 26.96    | 19.85    | 17.25    | 18.91    |
| TC1400001258.mm.1 |                                 | 69.63    | 81.41    | 64.37    | 39.55    | 32.86    | 39.68    |
| TC0X00001357.mm.1 |                                 | 16263.06 | 16557.67 | 16436.45 | 11060.05 | 9047.51  | 10996.57 |
| TC0600002827.mm.1 |                                 | 155.64   | 167.06   | 154.51   | 57.30    | 55.83    | 82.76    |
| TC0300000389.mm.1 |                                 | 402.41   | 626.70   | 600.50   | 182.29   | 151.51   | 123.07   |
| TC0200002730.mm.1 | Gm16356                         | 132.28   | 138.81   | 135.25   | 108.63   | 98.45    | 94.86    |
| TC0100003555.mm.1 |                                 | 3173.56  | 3458.75  | 3055.56  | 2073.58  | 2379.54  | 2196.22  |
| TC1300002393.mm.1 |                                 | 46.88    | 59.53    | 63.93    | 28.15    | 29.48    | 29.63    |
| TC0700004436.mm.1 | Gm19514                         | 60.53    | 79.24    | 76.17    | 31.39    | 36.51    | 27.41    |
| TC0700004439.mm.1 |                                 | 41.38    | 34.94    | 42.59    | 23.38    | 23.52    | 25.94    |
| TC1100003243.mm.1 |                                 | 26.25    | 25.64    | 23.75    | 18.24    | 19.86    | 18.01    |
| TC0800003064.mm.1 | Gm17709                         | 735.87   | 632.47   | 642.21   | 360.51   | 439.61   | 403.15   |
| TC0300000251.mm.1 |                                 | 12221.10 | 12787.64 | 11899.95 | 9192.62  | 7831.87  | 7789.77  |
| TC0800000591.mm.1 | Gm15758; AC109200.1             | 750.77   | 792.12   | 893.77   | 550.65   | 482.40   | 528.38   |
| TC0100002694.mm.1 |                                 | 95.04    | 120.06   | 92.78    | 46.32    | 56.86    | 49.41    |
| TC0300000562.mm.1 |                                 | 49.53    | 46.30    | 45.45    | 34.59    | 37.78    | 34.09    |
| TC1100000123.mm.1 | Gm11995; RP23-138G17.1          | 2880.74  | 3048.79  | 2982.16  | 1812.95  | 1525.57  | 1966.33  |
| TC0800002076.mm.1 |                                 | 230.33   | 233.51   | 192.07   | 87.15    | 77.99    | 113.11   |
| TC0200000402.mm.1 |                                 | 25.57    | 23.28    | 25.22    | 19.20    | 18.83    | 20.14    |
| TC1300002726.mm.1 |                                 | 101.47   | 101.96   | 110.77   | 72.68    | 71.58    | 61.00    |
| TC1300001426.mm.1 |                                 | 75.39    | 78.64    | 71.39    | 59.84    | 56.88    | 60.98    |
| TC1800000381.mm.1 | Gm24401                         | 25.92    | 28.01    | 26.96    | 19.88    | 21.27    | 18.61    |
| TC1700002670.mm.1 |                                 | 35.00    | 37.93    | 38.70    | 29.00    | 30.14    | 29.97    |
| TC0300002512.mm.1 | Terc                            | 126.75   | 117.51   | 125.10   | 98.10    | 94.73    | 87.68    |
| TC0900003265.mm.1 |                                 | 16.08    | 18.82    | 18.71    | 11.99    | 12.22    | 10.93    |
| TC1500001328.mm.1 | Snhg18                          | 821.49   | 669.68   | 686.57   | 388.98   | 331.29   | 420.82   |
| TC0X00000588.mm.1 | Gm14670                         | 152.63   | 159.20   | 154.48   | 127.51   | 120.49   | 112.58   |
| TC1700000127.mm.1 | Airn                            | 48.10    | 55.08    | 51.91    | 39.50    | 36.21    | 37.06    |
| TC1900001083.mm.1 | Gm24543                         | 368.29   | 394.11   | 403.34   | 230.49   | 234.19   | 279.00   |
| TC0300001343.mm.1 |                                 | 37.28    | 31.28    | 35.37    | 23.23    | 21.98    | 24.27    |

|                   |                       |          |          |          |          |          |          |
|-------------------|-----------------------|----------|----------|----------|----------|----------|----------|
| TC1400000345.mm.1 |                       | 6538.90  | 6927.20  | 6286.90  | 4334.19  | 3383.53  | 3412.91  |
| TC0800000678.mm.1 | Gm25403               | 138.25   | 117.11   | 107.62   | 63.35    | 45.57    | 52.97    |
| TC0400000983.mm.1 |                       | 4259.97  | 4158.39  | 4133.11  | 2984.63  | 2549.94  | 3045.97  |
| TC1900000986.mm.1 | Neat1                 | 932.08   | 994.29   | 829.64   | 409.07   | 327.05   | 480.02   |
| TC0900002948.mm.1 |                       | 43.36    | 34.69    | 37.96    | 25.37    | 24.18    | 23.67    |
| TC0200000277.mm.1 | Gm20038               | 96.14    | 86.91    | 90.73    | 27.94    | 39.12    | 43.65    |
| TC0400002886.mm.1 |                       | 18.56    | 19.63    | 20.10    | 15.98    | 14.92    | 14.49    |
| TC1200001191.mm.1 | Mir544                | 40.48    | 46.49    | 47.12    | 24.37    | 29.73    | 24.99    |
| TC0700000216.mm.1 |                       | 617.48   | 560.31   | 508.65   | 356.78   | 286.55   | 315.13   |
| TC0800002073.mm.1 |                       | 23.13    | 28.17    | 26.34    | 14.34    | 15.26    | 17.00    |
| TC1800000717.mm.1 |                       | 63.46    | 55.35    | 62.91    | 30.74    | 24.16    | 33.71    |
| TC1400000983.mm.1 |                       | 34.58    | 39.48    | 39.69    | 25.89    | 24.72    | 21.87    |
| TC0300001274.mm.1 |                       | 99.25    | 141.74   | 109.90   | 55.57    | 57.85    | 57.08    |
| TC0600002094.mm.1 |                       | 19.23    | 20.51    | 18.86    | 14.91    | 16.11    | 14.82    |
| TC0300002821.mm.1 |                       | 33187.50 | 34542.32 | 32366.61 | 24540.44 | 20370.69 | 23197.31 |
| TC0100003357.mm.1 |                       | 20.68    | 20.54    | 17.85    | 13.93    | 14.32    | 14.33    |
| TC0100003331.mm.1 |                       | 154.63   | 172.36   | 159.14   | 97.82    | 80.00    | 103.01   |
| TC0900000091.mm.1 |                       | 81.33    | 76.38    | 65.53    | 44.06    | 34.12    | 38.90    |
| TC1200002021.mm.1 |                       | 88.65    | 94.09    | 86.21    | 62.72    | 50.29    | 57.66    |
| TC0100002691.mm.1 |                       | 45.53    | 55.70    | 45.58    | 23.72    | 28.95    | 27.88    |
| TC0200002001.mm.1 |                       | 20.87    | 21.76    | 19.87    | 16.41    | 16.79    | 15.29    |
| TC1700000210.mm.1 | Mirlet7e              | 270.36   | 320.94   | 241.70   | 138.35   | 120.82   | 152.39   |
| TC1100003676.mm.1 | Gm25048               | 28.70    | 25.48    | 23.94    | 15.61    | 16.17    | 17.99    |
| TC0900000978.mm.1 | Gm7265                | 62.27    | 59.71    | 52.78    | 37.20    | 40.79    | 40.77    |
| TC1200000845.mm.1 | LOC100861892          | 89.23    | 94.06    | 92.47    | 68.28    | 56.31    | 57.18    |
| TC1300001215.mm.1 |                       | 53.49    | 64.94    | 59.53    | 37.46    | 34.03    | 39.59    |
| TC1200001508.mm.1 |                       | 368.11   | 358.41   | 313.11   | 178.66   | 141.84   | 195.19   |
| TC0X00002944.mm.1 |                       | 21456.79 | 25635.78 | 19872.06 | 13362.21 | 11667.81 | 11115.78 |
| TC0X00002822.mm.1 |                       | 45.99    | 50.28    | 53.57    | 33.07    | 36.03    | 36.29    |
| TC1800000383.mm.1 |                       | 102.38   | 129.62   | 99.68    | 52.02    | 62.16    | 58.76    |
| TC0100003100.mm.1 | Gm19487               | 22350.43 | 24731.87 | 20544.05 | 13200.66 | 9897.41  | 12094.01 |
| TC0200004526.mm.1 |                       | 52.99    | 54.08    | 54.98    | 31.05    | 29.34    | 37.82    |
| TC0800001065.mm.1 |                       | 23.01    | 25.07    | 23.67    | 18.63    | 18.74    | 16.83    |
| TC0700004437.mm.1 |                       | 35.87    | 32.77    | 36.89    | 21.73    | 18.67    | 15.85    |
| TC0900001233.mm.1 |                       | 9994.06  | 12141.00 | 10587.65 | 6943.37  | 5562.51  | 5728.66  |
| TC0300000592.mm.1 | Gm10780               | 12858.60 | 13534.18 | 16250.70 | 8068.41  | 6289.99  | 7535.17  |
| TC0600002223.mm.1 | Gm7887                | 3189.30  | 3379.91  | 2980.80  | 2444.43  | 2494.18  | 2531.33  |
| TC0300000130.mm.1 | Gm23330               | 30792.04 | 28520.27 | 34310.07 | 20025.86 | 15769.16 | 17372.48 |
| TC1200001161.mm.1 | Gm23787               | 138.28   | 130.66   | 86.42    | 44.46    | 44.90    | 39.49    |
| TC1000001837.mm.1 |                       | 26.65    | 29.08    | 29.88    | 21.31    | 18.12    | 19.03    |
| TC0200000029.mm.1 |                       | 50.27    | 64.47    | 49.60    | 29.88    | 32.11    | 30.42    |
| TC0600000383.mm.1 | Gm20022               | 120.02   | 130.46   | 137.65   | 80.56    | 80.02    | 93.84    |
| TC0200003094.mm.1 | Gm13356               | 55.40    | 67.64    | 57.64    | 40.15    | 36.01    | 39.06    |
| TC1800000056.mm.1 |                       | 46.03    | 51.14    | 50.90    | 38.88    | 35.76    | 37.94    |
| TC0900000227.mm.1 |                       | 56.71    | 69.89    | 59.64    | 40.46    | 34.10    | 35.19    |
| TC1700001566.mm.1 | Gm7809                | 213.29   | 200.43   | 221.51   | 161.97   | 155.08   | 140.52   |
| TC0600000312.mm.1 |                       | 60.03    | 77.39    | 63.00    | 40.75    | 37.94    | 35.86    |
| TC0100003702.mm.1 |                       | 47.48    | 55.61    | 39.44    | 25.30    | 24.71    | 23.62    |
| TC1100003216.mm.1 |                       | 35.20    | 30.86    | 30.72    | 22.16    | 24.05    | 21.61    |
| TC1200001181.mm.1 |                       | 32.03    | 34.50    | 32.67    | 22.50    | 25.30    | 21.15    |
| TC0400000197.mm.1 | Gm11883; RP23-25B10.2 | 512.98   | 524.52   | 606.31   | 362.21   | 362.43   | 394.52   |
| TC0X00003162.mm.1 |                       | 48.92    | 47.29    | 43.07    | 33.50    | 36.34    | 34.53    |
| TC1400000028.mm.1 | Gm26898               | 38.70    | 42.55    | 34.91    | 26.46    | 27.11    | 25.66    |
| TC0900000899.mm.1 |                       | 71.95    | 93.02    | 70.31    | 29.14    | 40.31    | 32.00    |
| TC0900003208.mm.1 |                       | 47.03    | 63.26    | 55.21    | 31.08    | 31.89    | 28.71    |
| TC1300001900.mm.1 |                       | 2591.84  | 2830.64  | 2904.42  | 1888.57  | 1882.38  | 2134.55  |
| TC0X00002958.mm.1 | Gm26475               | 25117.42 | 28626.15 | 27401.52 | 20840.09 | 19692.49 | 20953.26 |
| TC0500001900.mm.1 |                       | 75.43    | 80.16    | 69.70    | 37.86    | 36.33    | 48.14    |
| TC0100000797.mm.1 |                       | 17.95    | 19.58    | 19.79    | 11.34    | 13.88    | 12.47    |
| TC1400002839.mm.1 | Gm3500; Gm3373        | 52.04    | 51.21    | 52.98    | 39.22    | 35.85    | 41.81    |
| TC0700003443.mm.1 |                       | 1163.88  | 1422.22  | 1076.64  | 522.07   | 418.29   | 606.07   |
| TC0400001297.mm.1 | Gm12840; RP23-99G21.3 | 1639.77  | 1712.33  | 1444.41  | 1121.14  | 985.71   | 958.33   |
| TC1500001496.mm.1 |                       | 77.46    | 107.21   | 84.30    | 40.93    | 37.81    | 47.54    |
| TC1800000066.mm.1 | Gm7497                | 368.65   | 368.83   | 350.03   | 271.67   | 229.97   | 221.85   |
| TC0200001408.mm.1 | Gm13785               | 55.41    | 73.19    | 58.79    | 31.56    | 25.52    | 32.92    |
| TC1600001710.mm.1 |                       | 19.70    | 22.59    | 19.28    | 14.37    | 12.22    | 12.29    |
| TC0Y00000128.mm.1 |                       | 17.92    | 16.55    | 15.36    | 11.66    | 12.17    | 10.73    |
| TC1400001903.mm.1 | Gm22637               | 152.14   | 161.28   | 131.90   | 63.31    | 62.19    | 85.59    |
| TC1600001099.mm.1 | Gm22862               | 7196.74  | 8161.02  | 8085.03  | 5763.57  | 5346.94  | 4939.65  |
| TC1500001516.mm.1 | Gm19551               | 184.64   | 256.49   | 177.93   | 77.35    | 97.09    | 73.48    |
| TC1100002033.mm.1 | Gm20014               | 377.51   | 444.39   | 420.65   | 302.09   | 271.12   | 291.20   |
| TC0200001666.mm.1 |                       | 125.95   | 145.22   | 141.72   | 93.66    | 81.31    | 95.66    |
| TC0700002756.mm.1 |                       | 49.04    | 44.79    | 45.48    | 31.61    | 26.86    | 32.84    |
| TC0200003396.mm.1 |                       | 3716.36  | 3646.42  | 3728.08  | 2602.64  | 2380.24  | 2023.67  |
| TC1500001916.mm.1 |                       | 78.83    | 91.27    | 79.16    | 61.15    | 61.26    | 58.25    |
| TC1700002602.mm.1 |                       | 80.15    | 81.74    | 66.38    | 37.44    | 30.68    | 42.58    |
| TC0700001089.mm.1 |                       | 30.20    | 27.30    | 30.56    | 22.51    | 23.65    | 22.89    |
| TC1700000140.mm.1 |                       | 189.61   | 211.21   | 165.77   | 83.48    | 73.35    | 104.34   |
| TC0200002969.mm.1 |                       | 362.46   | 389.00   | 372.81   | 236.44   | 260.95   | 285.47   |
| TC1100000446.mm.1 |                       | 86.13    | 92.85    | 89.67    | 38.46    | 53.51    | 36.92    |

|                   |                        |           |           |           |           |           |           |
|-------------------|------------------------|-----------|-----------|-----------|-----------|-----------|-----------|
| TC0600002489.mm.1 |                        | 45.17     | 40.80     | 40.00     | 28.81     | 29.72     | 32.47     |
| TC1000001860.mm.1 |                        | 204.51    | 180.43    | 140.58    | 62.44     | 84.50     | 67.15     |
| TC1600001119.mm.1 |                        | 199.49    | 225.79    | 207.77    | 134.08    | 113.12    | 142.50    |
| TC0600002862.mm.1 |                        | 79.03     | 111.57    | 87.07     | 46.91     | 47.01     | 40.17     |
| TC1600001726.mm.1 |                        | 279.34    | 337.42    | 261.05    | 152.66    | 161.01    | 180.67    |
| TC0200004718.mm.1 | Gm14063; RP23-109J20.1 | 879.33    | 912.91    | 896.73    | 668.99    | 638.98    | 738.46    |
| TC0100003774.mm.1 |                        | 40.01     | 38.53     | 40.21     | 28.29     | 31.97     | 31.63     |
| TC0400004128.mm.1 |                        | 54.56     | 50.69     | 57.20     | 39.53     | 43.12     | 41.38     |
| TC0X00002130.mm.1 | Gm14604; RP23-260P9.1  | 332.41    | 364.70    | 381.90    | 253.78    | 205.63    | 225.99    |
| TC0900002534.mm.1 |                        | 82.19     | 85.03     | 89.38     | 53.39     | 56.53     | 64.80     |
| TC1300001491.mm.1 |                        | 22.77     | 24.04     | 24.39     | 17.79     | 18.94     | 19.79     |
| TC1800000601.mm.1 |                        | 56.14     | 86.68     | 66.26     | 28.36     | 29.51     | 32.58     |
| TC0100001342.mm.1 |                        | 719.58    | 524.74    | 587.70    | 296.67    | 209.13    | 269.83    |
| TC1200000820.mm.1 | D030025P21Rik          | 75.77     | 73.87     | 64.70     | 36.44     | 24.06     | 33.43     |
| TC0400002197.mm.1 |                        | 630.67    | 721.80    | 672.04    | 430.05    | 341.18    | 427.35    |
| TC1500000457.mm.1 |                        | 163.66    | 124.77    | 119.12    | 66.56     | 51.64     | 65.44     |
| TC0800001166.mm.1 |                        | 221.62    | 267.19    | 268.20    | 164.98    | 134.96    | 142.20    |
| TC1200001365.mm.1 |                        | 306.58    | 327.73    | 361.24    | 245.39    | 248.66    | 236.77    |
| TC0700000623.mm.1 | Gm12757                | 60.14     | 58.05     | 58.09     | 44.38     | 49.59     | 44.07     |
| TC0200002926.mm.1 |                        | 29272.71  | 28876.22  | 27621.64  | 19764.74  | 17436.89  | 21425.92  |
| TC1300001849.mm.1 |                        | 88677.43  | 98027.07  | 86878.62  | 64125.51  | 51484.88  | 52207.36  |
| TC1800000034.mm.1 |                        | 66.09     | 94.32     | 70.41     | 23.02     | 20.60     | 33.18     |
| TC0400002884.mm.1 |                        | 69.97     | 91.60     | 85.55     | 36.47     | 39.29     | 26.52     |
| TC1700001664.mm.1 |                        | 66.53     | 86.62     | 73.57     | 46.92     | 45.89     | 47.40     |
| TC1000002861.mm.1 |                        | 40.65     | 41.54     | 38.12     | 31.06     | 33.71     | 31.30     |
| TC1100000545.mm.1 | Gm12197; RP23-121P11.4 | 620.14    | 645.11    | 647.17    | 460.80    | 373.66    | 445.29    |
| TC1400002784.mm.1 | Gm3020; Gm10409        | 79.43     | 82.45     | 80.93     | 57.71     | 53.91     | 64.43     |
| TC0200005206.mm.1 |                        | 27.99     | 29.33     | 31.72     | 21.77     | 23.23     | 23.41     |
| TC0500000509.mm.1 | Gm10025                | 82411.65  | 94754.58  | 83886.53  | 62647.65  | 54787.86  | 61998.63  |
| TC1300000122.mm.1 |                        | 57.39     | 49.55     | 56.42     | 29.75     | 29.45     | 36.97     |
| TC0900002099.mm.1 |                        | 86.27     | 95.25     | 82.31     | 38.57     | 54.33     | 42.03     |
| TC1800001703.mm.1 |                        | 18.43     | 19.46     | 19.26     | 13.82     | 14.48     | 12.05     |
| TC1300001223.mm.1 |                        | 25.09     | 26.93     | 21.27     | 14.44     | 12.53     | 15.19     |
| TC0600001385.mm.1 |                        | 171.66    | 210.57    | 211.81    | 82.17     | 73.95     | 108.84    |
| TC0200001686.mm.1 |                        | 103.13    | 113.55    | 108.21    | 76.54     | 67.47     | 81.04     |
| TC0900002098.mm.1 |                        | 56.87     | 64.74     | 61.54     | 29.49     | 38.47     | 27.50     |
| TC1700002683.mm.1 |                        | 36.46     | 38.96     | 28.11     | 18.01     | 18.84     | 18.82     |
| TC1100000626.mm.1 |                        | 61.95     | 58.06     | 61.02     | 47.46     | 41.81     | 47.46     |
| TC0100000722.mm.1 | Gm25754                | 136591.10 | 160746.70 | 155402.80 | 108620.10 | 111258.00 | 101872.20 |
| TC0100001888.mm.1 | Gm24802                | 136591.10 | 160746.70 | 155402.80 | 108620.10 | 111258.00 | 101872.20 |
| TC0100002294.mm.1 | Gm22419                | 136591.10 | 160746.70 | 155402.80 | 108620.10 | 111258.00 | 101872.20 |
| TC0100002671.mm.1 | Gm22112                | 136591.10 | 160746.70 | 155402.80 | 108620.10 | 111258.00 | 101872.20 |
| TC0300001225.mm.1 | Gm24744                | 136591.10 | 160746.70 | 155402.80 | 108620.10 | 111258.00 | 101872.20 |
| TC0300001226.mm.1 | Gm26137                | 136591.10 | 160746.70 | 155402.80 | 108620.10 | 111258.00 | 101872.20 |
| TC0300001993.mm.1 | Gm22029                | 136591.10 | 160746.70 | 155402.80 | 108620.10 | 111258.00 | 101872.20 |
| TC0300002791.mm.1 | Gm25347                | 136591.10 | 160746.70 | 155402.80 | 108620.10 | 111258.00 | 101872.20 |
| TC0400000137.mm.1 | Gm24567                | 136591.10 | 160746.70 | 155402.80 | 108620.10 | 111258.00 | 101872.20 |
| TC0400002099.mm.1 | Gm22991                | 136591.10 | 160746.70 | 155402.80 | 108620.10 | 111258.00 | 101872.20 |
| TC0400002377.mm.1 | Gm23304                | 136591.10 | 160746.70 | 155402.80 | 108620.10 | 111258.00 | 101872.20 |
| TC0700001493.mm.1 | Gm25774                | 136591.10 | 160746.70 | 155402.80 | 108620.10 | 111258.00 | 101872.20 |
| TC0700001894.mm.1 | Gm25778                | 136591.10 | 160746.70 | 155402.80 | 108620.10 | 111258.00 | 101872.20 |
| TC0700002324.mm.1 | Gm26248                | 136591.10 | 160746.70 | 155402.80 | 108620.10 | 111258.00 | 101872.20 |
| TC0700003452.mm.1 | Gm23844                | 136591.10 | 160746.70 | 155402.80 | 108620.10 | 111258.00 | 101872.20 |
| TC0800002026.mm.1 | Gm23177                | 136591.10 | 160746.70 | 155402.80 | 108620.10 | 111258.00 | 101872.20 |
| TC0900001937.mm.1 | Gm26190                | 136591.10 | 160746.70 | 155402.80 | 108620.10 | 111258.00 | 101872.20 |
| TC0X00001078.mm.1 | Gm22102                | 136591.10 | 160746.70 | 155402.80 | 108620.10 | 111258.00 | 101872.20 |
| TC1300002157.mm.1 | Gm24193                | 136591.10 | 160746.70 | 155402.80 | 108620.10 | 111258.00 | 101872.20 |
| TC1400001825.mm.1 | Gm25208                | 136591.10 | 160746.70 | 155402.80 | 108620.10 | 111258.00 | 101872.20 |
| TC1400001835.mm.1 | Gm25228                | 136591.10 | 160746.70 | 155402.80 | 108620.10 | 111258.00 | 101872.20 |
| TC1700000334.mm.1 | Gm24427                | 136591.10 | 160746.70 | 155402.80 | 108620.10 | 111258.00 | 101872.20 |
| TC1700002684.mm.1 | Gm22346                | 136591.10 | 160746.70 | 155402.80 | 108620.10 | 111258.00 | 101872.20 |
| TC1800000198.mm.1 | Gm23606                | 136591.10 | 160746.70 | 155402.80 | 108620.10 | 111258.00 | 101872.20 |
| TC1800000478.mm.1 | Gm24617                | 136591.10 | 160746.70 | 155402.80 | 108620.10 | 111258.00 | 101872.20 |
| TC1900000180.mm.1 | Gm24484                | 136591.10 | 160746.70 | 155402.80 | 108620.10 | 111258.00 | 101872.20 |
| TC0200005292.mm.1 |                        | 164.95    | 164.87    | 130.21    | 77.51     | 87.04     | 65.28     |
| TC1200002051.mm.1 |                        | 592.10    | 575.35    | 514.31    | 429.47    | 397.71    | 422.66    |
| TC1500001495.mm.1 |                        | 116.33    | 176.86    | 110.95    | 55.02     | 43.26     | 49.45     |
| TC1600001969.mm.1 |                        | 97.90     | 121.02    | 96.60     | 63.57     | 67.70     | 58.94     |
| TC0800001367.mm.1 |                        | 37.47     | 32.10     | 31.80     | 20.88     | 20.69     | 24.05     |
| TC0600000217.mm.1 |                        | 58.37     | 62.45     | 62.75     | 51.55     | 46.76     | 48.96     |
| TC0900002535.mm.1 | Gm19279                | 370.47    | 424.73    | 415.05    | 285.87    | 245.22    | 284.50    |
| TC1700000129.mm.1 |                        | 154.85    | 169.45    | 169.51    | 92.15     | 90.12     | 115.58    |
| TC1700002254.mm.1 |                        | 81.67     | 87.75     | 86.56     | 61.06     | 49.71     | 47.33     |
| TC0400002813.mm.1 |                        | 96.11     | 66.23     | 76.10     | 28.46     | 26.49     | 38.27     |
| TC0600002864.mm.1 |                        | 80.05     | 130.98    | 88.36     | 35.48     | 40.02     | 39.74     |
| TC1100000438.mm.1 | Gm22121                | 29.80     | 31.58     | 32.90     | 25.29     | 23.43     | 22.20     |
| TC0100002535.mm.1 |                        | 43.23     | 38.32     | 38.62     | 28.32     | 30.49     | 26.33     |
| TC0700004434.mm.1 |                        | 98.38     | 159.33    | 111.48    | 50.77     | 51.61     | 46.19     |
| TC0X00003370.mm.1 | Gm23197                | 21.51     | 19.88     | 17.28     | 11.95     | 13.40     | 11.73     |
| TC0400000638.mm.1 |                        | 78.31     | 107.32    | 107.51    | 52.94     | 48.70     | 45.74     |

|                   |                             |           |           |           |           |           |          |
|-------------------|-----------------------------|-----------|-----------|-----------|-----------|-----------|----------|
| TC0200003756.mm.1 |                             | 52.24     | 59.17     | 53.74     | 39.90     | 34.59     | 40.09    |
| TC0500002914.mm.1 |                             | 25.30     | 30.19     | 28.84     | 20.02     | 17.22     | 17.15    |
| TC0900000474.mm.1 |                             | 3851.21   | 5027.67   | 4085.82   | 2634.90   | 2551.58   | 2695.60  |
| TC0100002699.mm.1 |                             | 1821.69   | 2238.57   | 1817.35   | 953.98    | 881.87    | 1185.86  |
| TC0400000729.mm.1 |                             | 117.39    | 143.78    | 112.79    | 58.05     | 39.79     | 58.81    |
| TC1100002143.mm.1 |                             | 601.30    | 733.17    | 671.41    | 448.51    | 357.00    | 377.86   |
| TC0400001065.mm.1 |                             | 90.48     | 104.91    | 99.94     | 69.82     | 72.99     | 63.23    |
| TC1700002538.mm.1 | Gm26749                     | 59.17     | 62.09     | 55.53     | 46.14     | 44.46     | 40.46    |
| TC0300001393.mm.1 | Gm22468                     | 133044.80 | 156187.60 | 153368.70 | 107606.10 | 107279.40 | 98727.97 |
| TC0200003055.mm.1 |                             | 121.35    | 128.53    | 114.43    | 52.53     | 58.61     | 76.03    |
| TC1300001175.mm.1 |                             | 121.88    | 128.47    | 91.64     | 36.79     | 53.09     | 49.00    |
| TC0700001895.mm.1 |                             | 30128.76  | 29629.93  | 27722.41  | 20735.42  | 15844.31  | 17254.73 |
| TC1500001497.mm.1 |                             | 120.86    | 174.60    | 148.06    | 57.35     | 56.72     | 76.14    |
| TC0400001522.mm.1 | Gm24621                     | 143.90    | 168.47    | 152.57    | 105.65    | 103.00    | 117.07   |
| TC1400000508.mm.1 | Gm15562; RP23-36P21.4       | 86.01     | 117.07    | 86.25     | 49.21     | 53.92     | 46.88    |
| TC0600000123.mm.1 |                             | 74.87     | 68.35     | 70.27     | 51.49     | 54.37     | 58.28    |
| TC1200001165.mm.1 | B830012L14Rik; RP23-378G4.2 | 38.02     | 47.83     | 43.68     | 27.43     | 28.16     | 24.08    |
| TC0X00000542.mm.1 | Gm14888; RP23-150G4.2       | 2289.64   | 2194.15   | 2014.26   | 1241.48   | 896.87    | 1231.30  |
| TC1700002138.mm.1 | Runx2                       | 185.34    | 177.65    | 154.12    | 125.68    | 117.55    | 121.44   |
| TC0X00001260.mm.1 |                             | 30.46     | 35.27     | 30.17     | 22.95     | 23.48     | 21.21    |
| TC1000001251.mm.1 | Gm25587                     | 4350.51   | 5250.41   | 4857.51   | 3253.68   | 2587.54   | 2633.07  |
| TC1200001502.mm.1 |                             | 55.37     | 57.72     | 59.24     | 39.35     | 32.33     | 40.60    |
| TC1200001517.mm.1 |                             | 55.37     | 57.72     | 59.24     | 39.35     | 32.33     | 40.60    |
| TC0600002866.mm.1 |                             | 48.88     | 59.21     | 51.83     | 38.35     | 35.83     | 37.84    |
| TC1400000208.mm.1 |                             | 62.03     | 55.96     | 48.85     | 22.78     | 31.46     | 29.14    |
| TC0200004717.mm.1 | Gm14060; RP23-181O3.2       | 699.66    | 651.73    | 605.11    | 448.71    | 422.69    | 493.62   |
| TC0400004172.mm.1 |                             | 51.32     | 55.05     | 52.27     | 27.66     | 32.63     | 36.77    |
| TC0200004197.mm.1 |                             | 2272.05   | 2442.32   | 2227.30   | 1601.69   | 1291.70   | 1588.37  |
| TC1300001108.mm.1 | Gm5086                      | 2584.7    | 254.82    | 173.74    | 95.20     | 88.83     | 109.39   |
| TC1700000131.mm.1 |                             | 50.01     | 62.94     | 61.21     | 33.19     | 29.02     | 36.34    |
| TC0200000709.mm.1 | Nr6a1os; RP23-334M3.3       | 38.84     | 36.78     | 37.53     | 26.59     | 24.61     | 20.46    |
| TC1200001141.mm.1 |                             | 32.94     | 33.11     | 30.78     | 19.14     | 23.91     | 19.31    |
| TC1300001351.mm.1 |                             | 716.04    | 880.46    | 742.29    | 464.87    | 364.45    | 462.40   |
| TC0400000472.mm.1 |                             | 60.86     | 67.37     | 51.49     | 38.00     | 37.96     | 35.89    |
| TC1600002047.mm.1 |                             | 373.94    | 419.37    | 420.83    | 254.11    | 176.63    | 208.76   |
| TC1500000091.mm.1 |                             | 29.95     | 25.02     | 27.73     | 14.88     | 14.82     | 18.71    |
| TC0600002908.mm.1 |                             | 40.23     | 40.39     | 33.23     | 25.28     | 26.57     | 24.71    |
| TC0200000734.mm.1 |                             | 351.11    | 376.20    | 355.46    | 258.70    | 278.21    | 297.11   |
| TC0300000739.mm.1 | Gm23054                     | 74.96     | 72.26     | 87.25     | 54.33     | 53.41     | 47.70    |
| TC0600000828.mm.1 |                             | 40.43     | 42.21     | 42.15     | 33.26     | 35.02     | 30.76    |
| TC0400000477.mm.1 |                             | 68.61     | 93.67     | 66.51     | 33.67     | 39.75     | 39.08    |
| TC1600000878.mm.1 | Mirlet7c-1                  | 55.64     | 66.77     | 47.70     | 26.84     | 16.32     | 18.47    |
| TC1300002570.mm.1 |                             | 23.00     | 19.81     | 21.02     | 16.12     | 16.78     | 16.21    |
| TC0500002365.mm.1 | Gm10048                     | 223.50    | 265.90    | 239.35    | 175.55    | 183.17    | 168.86   |
| TC0400003916.mm.1 |                             | 59.67     | 53.52     | 54.12     | 37.07     | 32.89     | 40.90    |
| TC1100000603.mm.1 | Mir6920                     | 75.15     | 79.26     | 63.96     | 50.79     | 47.47     | 45.46    |
| TC1000000104.mm.1 |                             | 41.59     | 48.37     | 43.99     | 24.89     | 31.58     | 26.45    |
| TC0200002941.mm.1 |                             | 70.58     | 64.40     | 57.78     | 44.02     | 45.83     | 46.32    |
| TC0900000914.mm.1 |                             | 86.33     | 93.51     | 91.91     | 49.82     | 42.57     | 60.03    |
| TC1500001515.mm.1 |                             | 105.71    | 161.08    | 111.79    | 35.81     | 51.17     | 50.42    |
| TC0300001273.mm.1 |                             | 265.93    | 293.17    | 237.14    | 136.18    | 113.53    | 160.38   |
| TC1400000836.mm.1 |                             | 48.71     | 52.16     | 50.67     | 42.91     | 40.06     | 38.16    |
| TC1300000154.mm.1 |                             | 48.11     | 42.12     | 36.15     | 19.32     | 24.51     | 23.44    |
| TC0300001387.mm.1 |                             | 122.55    | 110.36    | 103.97    | 75.25     | 61.22     | 74.49    |
| TC0200001688.mm.1 |                             | 74.30     | 80.00     | 66.53     | 49.22     | 45.53     | 38.70    |
| TC1500000458.mm.1 |                             | 22.88     | 21.75     | 27.62     | 16.22     | 14.42     | 14.74    |
| TC0600002807.mm.1 | Gm23510                     | 5843.99   | 5322.73   | 6295.83   | 3881.97   | 2922.68   | 3006.74  |
| TC0900002096.mm.1 |                             | 54.73     | 58.09     | 55.72     | 36.69     | 38.05     | 44.46    |
| TC1600000876.mm.1 |                             | 124.82    | 221.97    | 158.13    | 63.60     | 56.46     | 64.68    |
| TC0400001991.mm.1 |                             | 123.72    | 113.54    | 121.36    | 94.47     | 80.82     | 90.30    |
| TC1000002183.mm.1 |                             | 422.13    | 399.54    | 369.52    | 307.57    | 263.79    | 269.96   |
| TC1500000941.mm.1 |                             | 58.12     | 77.83     | 66.48     | 42.78     | 38.36     | 39.23    |
| TC1600001668.mm.1 |                             | 46.04     | 60.85     | 55.11     | 34.34     | 29.38     | 29.17    |
| TC1000002790.mm.1 |                             | 15249.46  | 16588.10  | 13371.66  | 10201.22  | 9198.49   | 10389.88 |
| TC1000001909.mm.1 | Mir680-3                    | 201.20    | 224.83    | 243.20    | 135.65    | 107.46    | 139.61   |
| TC0200002222.mm.1 |                             | 31.82     | 27.23     | 29.04     | 20.98     | 22.37     | 22.61    |
| TC0800003241.mm.1 | 2610005L07Rik               | 1876.51   | 1950.74   | 1691.21   | 1259.87   | 1237.85   | 1420.06  |
| TC1700002391.mm.1 |                             | 18.50     | 16.12     | 17.22     | 10.85     | 13.06     | 11.45    |
| TC0100000982.mm.1 |                             | 973.83    | 866.35    | 909.41    | 520.83    | 502.46    | 652.78   |
| TC0600001225.mm.1 |                             | 353.73    | 432.85    | 378.25    | 267.80    | 220.03    | 244.46   |
| TC1600000632.mm.1 |                             | 30.34     | 31.73     | 35.98     | 15.62     | 18.06     | 21.32    |
| TC0700003948.mm.1 | Gm16464                     | 6687.70   | 7433.02   | 6602.10   | 3638.63   | 3809.58   | 4809.13  |
| TC1500001140.mm.1 |                             | 142.70    | 177.82    | 139.00    | 62.21     | 32.54     | 51.64    |
| TC1200000364.mm.1 |                             | 339.15    | 396.03    | 385.98    | 137.23    | 151.32    | 215.23   |
| TC0400003484.mm.1 |                             | 99.75     | 102.78    | 87.06     | 65.62     | 53.78     | 50.06    |
| TC0X00001734.mm.1 | Gm15253; RP23-22L6.8        | 6768.89   | 8430.13   | 7453.65   | 5210.89   | 5012.13   | 5332.58  |
| TC0300001383.mm.1 |                             | 163.72    | 187.74    | 172.10    | 79.68     | 96.76     | 112.30   |
| TC0600000056.mm.1 |                             | 36.44     | 42.07     | 41.29     | 29.91     | 30.76     | 31.21    |
| TC0200005067.mm.1 |                             | 68.01     | 71.34     | 58.98     | 46.46     | 48.67     | 45.27    |



|                   |                               |          |          |          |          |          |          |
|-------------------|-------------------------------|----------|----------|----------|----------|----------|----------|
| TC0500003695.mm.1 |                               | 142.20   | 160.87   | 106.54   | 65.44    | 55.74    | 46.07    |
| TC1700002546.mm.1 | Gm17538                       | 15901.72 | 18417.31 | 17684.58 | 13501.34 | 13574.80 | 13522.43 |
| TC1100001059.mm.1 |                               | 31.54    | 34.65    | 27.56    | 18.31    | 21.42    | 19.91    |
| TC0800002080.mm.1 | Gm19274                       | 18.46    | 20.38    | 19.11    | 13.89    | 14.65    | 15.84    |
| TC1500001635.mm.1 | 9130004J05Rik                 | 141.98   | 146.12   | 145.13   | 108.76   | 99.69    | 118.55   |
| TC0900002595.mm.1 |                               | 257.72   | 242.66   | 229.55   | 164.16   | 146.24   | 181.79   |
| TC1300000156.mm.1 |                               | 30.58    | 27.53    | 26.18    | 21.43    | 19.10    | 18.52    |
| TC1300001403.mm.1 |                               | 4731.79  | 4685.11  | 4342.52  | 3668.72  | 3110.57  | 3377.61  |
| TC0300000355.mm.1 |                               | 191.94   | 255.43   | 177.33   | 82.62    | 102.50   | 106.31   |
| TC0300001258.mm.1 | Gm15400                       | 73.60    | 73.18    | 69.47    | 58.30    | 54.26    | 61.20    |
| TC0400000657.mm.1 | Gm12529                       | 84.77    | 76.84    | 67.85    | 54.50    | 50.98    | 50.20    |
| TC0600002831.mm.1 |                               | 48.78    | 53.66    | 57.07    | 29.62    | 36.19    | 26.89    |
| TC1000000225.mm.1 |                               | 307.06   | 448.26   | 302.58   | 149.64   | 106.36   | 149.67   |
| TC0200001667.mm.1 |                               | 60.75    | 58.29    | 60.79    | 46.75    | 45.44    | 39.09    |
| TC0400000516.mm.1 | Gm12424                       | 598.95   | 620.34   | 538.46   | 429.03   | 425.65   | 465.85   |
| TC0800002081.mm.1 |                               | 25.22    | 25.93    | 20.62    | 14.14    | 16.26    | 14.62    |
| TC0100000221.mm.1 | D630036G22Rik                 | 174.25   | 182.47   | 156.82   | 126.18   | 128.25   | 112.71   |
| TC1200000379.mm.1 |                               | 27.41    | 32.41    | 27.64    | 21.67    | 20.99    | 19.86    |
| TC1400000997.mm.1 | Mir320                        | 164.28   | 189.73   | 153.00   | 119.48   | 107.17   | 114.86   |
| TC0X00000938.mm.1 | Gm14814; RP23-437A4.2         | 1066.72  | 1117.40  | 998.27   | 769.81   | 796.24   | 868.20   |
| TC0400002195.mm.1 | Gm11815; RP23-172G14.2        | 275.68   | 302.27   | 252.20   | 204.58   | 198.81   | 209.57   |
| TC0100000156.mm.1 | Mir30c-2                      | 40.47    | 46.97    | 42.34    | 33.69    | 30.66    | 32.78    |
| TC1700001304.mm.1 | Gm19773                       | 27.69    | 25.50    | 25.43    | 19.93    | 17.47    | 20.42    |
| TC0200001175.mm.1 | Gm13688                       | 782.53   | 766.03   | 642.08   | 506.56   | 428.38   | 475.71   |
| TC0400000335.mm.1 |                               | 394.07   | 361.18   | 388.55   | 309.00   | 293.65   | 322.75   |
| TC1300001220.mm.1 |                               | 21.45    | 22.04    | 22.55    | 14.41    | 17.01    | 16.98    |
| TC1200001136.mm.1 | 6430411K18Rik; Mir127; Mir433 | 69.70    | 86.73    | 63.77    | 40.76    | 34.25    | 42.62    |
| TC0X00000394.mm.1 |                               | 190.21   | 297.05   | 190.37   | 78.49    | 80.35    | 102.05   |
| TC0700003063.mm.1 |                               | 1085.29  | 1145.85  | 941.32   | 439.93   | 247.04   | 424.90   |
| TC0500003697.mm.1 |                               | 110.76   | 101.81   | 81.83    | 43.05    | 27.84    | 43.83    |
| TC0800001553.mm.1 |                               | 43.39    | 34.14    | 35.75    | 25.38    | 25.08    | 24.54    |
| TC0400001191.mm.1 |                               | 54.82    | 72.40    | 63.24    | 34.93    | 32.91    | 40.67    |
| TC0500000304.mm.1 |                               | 40.52    | 39.33    | 34.69    | 28.42    | 29.76    | 28.97    |
| TC0700001384.mm.1 | LOC100861604                  | 316.21   | 277.44   | 281.20   | 188.57   | 135.88   | 170.24   |
| TC0200001500.mm.1 | Gm13804                       | 61.97    | 57.14    | 66.67    | 47.26    | 46.59    | 42.30    |
| TC1900000671.mm.1 |                               | 22.04    | 22.95    | 25.39    | 16.08    | 16.66    | 18.40    |
| TC0100000518.mm.1 | Gm20342                       | 112.75   | 113.47   | 103.91   | 93.80    | 86.19    | 88.04    |
| TC0200002046.mm.1 | Gm25704                       | 223.48   | 230.61   | 244.91   | 178.47   | 142.50   | 154.52   |
| TC0600000086.mm.1 |                               | 300.91   | 373.95   | 374.21   | 235.20   | 201.70   | 195.37   |
| TC0300000327.mm.1 |                               | 9578.43  | 11646.23 | 10317.78 | 7451.72  | 6048.40  | 6518.09  |
| TC0200003615.mm.1 |                               | 64.18    | 80.40    | 71.62    | 41.41    | 50.05    | 43.83    |
| TC0400000223.mm.1 | Gm25173                       | 24853.69 | 23423.50 | 26193.91 | 20328.31 | 18313.44 | 19725.87 |
| TC0500002689.mm.1 | Gm25211                       | 24853.69 | 23423.50 | 26193.91 | 20328.31 | 18313.44 | 19725.87 |
| TC1100001603.mm.1 | Gm26324                       | 24853.69 | 23423.50 | 26193.91 | 20328.31 | 18313.44 | 19725.87 |
| TC1200001300.mm.1 | Gm23732                       | 24853.69 | 23423.50 | 26193.91 | 20328.31 | 18313.44 | 19725.87 |
| TC1200001425.mm.1 | Tubb2a-ps2                    | 338.38   | 337.28   | 313.30   | 203.04   | 163.71   | 224.24   |
| TC0300001675.mm.1 |                               | 63.06    | 83.98    | 77.30    | 40.70    | 33.19    | 26.60    |
| TC0200003478.mm.1 |                               | 398.97   | 570.77   | 428.41   | 198.15   | 227.71   | 254.77   |
| TC1800000722.mm.1 |                               | 54.49    | 83.04    | 70.38    | 34.81    | 36.09    | 33.58    |
| TC0300000632.mm.1 |                               | 101.33   | 119.63   | 65.97    | 37.02    | 32.34    | 34.88    |
| TC0700000603.mm.1 | Gm24766                       | 22788.33 | 27742.43 | 24490.64 | 18072.95 | 15270.16 | 16489.57 |
| TC0700000606.mm.1 | Gm25817                       | 22788.33 | 27742.43 | 24490.64 | 18072.95 | 15270.16 | 16489.57 |
| TC0100000801.mm.1 |                               | 35.38    | 32.58    | 30.11    | 24.56    | 25.76    | 24.83    |
| TC0X00001167.mm.1 |                               | 52.43    | 51.57    | 52.41    | 34.45    | 27.19    | 36.16    |
| TC1200000445.mm.1 | Gm22220                       | 636.91   | 550.55   | 532.37   | 427.06   | 405.63   | 381.10   |
| TC1800000913.mm.1 |                               | 8987.89  | 8262.60  | 9147.28  | 5185.38  | 3179.71  | 3562.45  |
| TC1300001319.mm.1 | Gm10734                       | 42.46    | 42.38    | 39.45    | 27.73    | 31.62    | 32.71    |
| TC1200000366.mm.1 |                               | 46.49    | 51.62    | 46.51    | 34.01    | 35.40    | 38.99    |
| TC0100002279.mm.1 |                               | 292.65   | 506.50   | 253.83   | 85.34    | 110.08   | 105.33   |
| TC1200001160.mm.1 | Gm25856                       | 78.65    | 118.69   | 94.53    | 48.73    | 51.69    | 43.77    |
| TC1200000637.mm.1 |                               | 22.07    | 18.66    | 21.85    | 15.29    | 14.95    | 15.78    |
| TC1900001087.mm.1 |                               | 162.72   | 138.02   | 173.04   | 91.71    | 93.58    | 69.97    |
| TC0500002318.mm.1 | Gm5292                        | 3949.76  | 3715.83  | 3819.02  | 3190.97  | 2725.71  | 2923.96  |
| TC0200001469.mm.1 | Gm13800; RP23-246E11.1        | 249.54   | 216.75   | 253.46   | 159.96   | 133.42   | 165.90   |
| TC0800003221.mm.1 | Gm21811; 2610005L07Rik        | 12654.92 | 13771.17 | 11645.20 | 8947.34  | 7565.86  | 8989.69  |
| TC0600002778.mm.1 |                               | 7157.04  | 6578.75  | 7431.52  | 5013.66  | 3742.44  | 4034.29  |
| TC0X00000540.mm.1 | Gm14646; RP23-44A17.1         | 397.19   | 350.60   | 361.66   | 237.58   | 176.82   | 231.84   |
| TC0X00000239.mm.1 |                               | 111.24   | 141.99   | 124.87   | 83.04    | 78.17    | 87.25    |
| TC0100002280.mm.1 |                               | 705.01   | 1312.61  | 747.91   | 198.51   | 163.63   | 297.41   |
| TC1700000174.mm.1 |                               | 99.22    | 87.26    | 75.90    | 42.69    | 55.15    | 41.89    |
| TC0400002653.mm.1 | Gm22042                       | 33216.17 | 30453.32 | 33224.29 | 23457.74 | 17623.88 | 19008.38 |
| TC1600000682.mm.1 | Gm15640; RP23-244J23.1        | 153.17   | 132.84   | 115.37   | 83.23    | 66.14    | 77.33    |
| TC1800000087.mm.1 | Mir1b                         | 179.67   | 178.25   | 146.86   | 107.88   | 117.14   | 98.53    |
| TC0100001116.mm.1 |                               | 197.57   | 178.30   | 189.99   | 131.16   | 118.93   | 146.36   |
| TC0900002257.mm.1 |                               | 23.80    | 16.41    | 19.07    | 10.67    | 11.10    | 11.01    |
| TC0700000111.mm.1 |                               | 28.36    | 29.49    | 29.65    | 23.29    | 22.78    | 25.54    |
| TC1300000767.mm.1 |                               | 1380.76  | 1652.91  | 1302.98  | 912.17   | 907.70   | 1007.45  |
| TC1000001775.mm.1 |                               | 89.33    | 102.28   | 77.30    | 51.49    | 43.74    | 55.71    |
| TC1300000058.mm.1 |                               | 21.75    | 31.74    | 28.03    | 11.82    | 14.21    | 14.54    |

|                         |                        |          |          |          |          |          |          |
|-------------------------|------------------------|----------|----------|----------|----------|----------|----------|
| TC0600002507.mm.1       |                        | 19589.43 | 19534.28 | 17890.96 | 13918.95 | 11932.45 | 14432.91 |
| TC0300002774.mm.1       |                        | 305.98   | 322.49   | 366.28   | 242.44   | 212.32   | 199.40   |
| TC1700001242.mm.1       |                        | 144.16   | 152.86   | 135.39   | 100.85   | 98.90    | 115.30   |
| TC0400003914.mm.1       | Gm13050                | 11241.06 | 10638.62 | 10414.89 | 8788.15  | 7544.76  | 8388.62  |
| TC010000349.mm.1        |                        | 23.32    | 24.31    | 20.27    | 16.19    | 16.93    | 16.90    |
| TC1500000940.mm.1       |                        | 209.29   | 242.30   | 247.26   | 154.60   | 169.88   | 173.71   |
| TC0800000967.mm.1       | Mir7069                | 146.53   | 145.73   | 127.04   | 107.49   | 109.72   | 102.60   |
| TC0600002824.mm.1       |                        | 60.73    | 53.53    | 62.19    | 33.72    | 34.05    | 42.58    |
| TC170000132.mm.1        | Gm23833                | 44.25    | 51.53    | 50.70    | 33.91    | 26.31    | 31.37    |
| TC0300001590.mm.1       |                        | 136.62   | 123.27   | 100.31   | 75.79    | 70.01    | 66.25    |
| TC0500002512.mm.1       |                        | 84.35    | 79.75    | 92.53    | 50.76    | 63.56    | 53.01    |
| TC1100000476.mm.1       |                        | 3459.69  | 3324.88  | 3623.13  | 1981.29  | 1515.92  | 2221.00  |
| TC0X00001615.mm.1       |                        | 177.73   | 183.14   | 202.30   | 140.33   | 118.40   | 137.99   |
| TC1200001943.mm.1       | Gm29344; Gm7862        | 660.08   | 695.67   | 610.98   | 517.67   | 532.21   | 483.56   |
| TC1400002786.mm.1       | Gm3020; Gm10409        | 103.66   | 106.49   | 99.95    | 80.00    | 69.33    | 82.25    |
| TC0X00001609.mm.1       |                        | 167.51   | 184.17   | 185.24   | 149.32   | 133.96   | 135.77   |
| TC0100000482.mm.1       | Gm11581                | 189.39   | 128.76   | 151.06   | 84.39    | 88.49    | 78.99    |
| TC1700001840.mm.1       |                        | 38.44    | 38.66    | 34.47    | 30.83    | 29.57    | 28.64    |
| TC0200000619.mm.1       |                        | 428.51   | 586.46   | 465.44   | 274.84   | 281.51   | 310.23   |
| TC0300002655.mm.1       |                        | 428.51   | 586.46   | 465.44   | 274.84   | 281.51   | 310.23   |
| TC0600001362.mm.1       |                        | 428.51   | 586.46   | 465.44   | 274.84   | 281.51   | 310.23   |
| TC1200000494.mm.1       |                        | 428.51   | 586.46   | 465.44   | 274.84   | 281.51   | 310.23   |
| TC1800001172.mm.1       |                        | 428.51   | 586.46   | 465.44   | 274.84   | 281.51   | 310.23   |
| TC1500000325.mm.1       |                        | 18.47    | 21.58    | 16.90    | 12.73    | 13.30    | 12.65    |
| TC0500001002.mm.1       |                        | 62.76    | 62.97    | 56.89    | 30.16    | 24.26    | 37.99    |
| TC0200002458.mm.1       |                        | 56.62    | 54.62    | 49.17    | 23.19    | 34.39    | 28.58    |
| TC1800000928.mm.1       | Gm10557                | 29568.61 | 31883.70 | 28179.01 | 19437.99 | 19552.21 | 23357.30 |
| TC1700002601.mm.1       |                        | 67.59    | 89.26    | 76.87    | 52.11    | 48.65    | 45.69    |
| TC1000002907.mm.1       | Cnot2                  | 2411.39  | 2539.85  | 2239.64  | 1731.95  | 1689.42  | 1942.69  |
| TC0900000216.mm.1       | Zfp809                 | 779.62   | 718.93   | 607.77   | 407.44   | 296.83   | 397.59   |
| TC0200000793.mm.1       |                        | 67.75    | 79.96    | 71.05    | 53.61    | 48.95    | 43.55    |
| TC0900001839.mm.1       |                        | 45.08    | 40.47    | 41.80    | 31.30    | 33.62    | 35.13    |
| TC0600001582.mm.1       |                        | 68.47    | 91.75    | 70.65    | 43.43    | 48.63    | 45.33    |
| TC1400000244.mm.1       | 4931406H21Rik          | 44.65    | 50.25    | 44.03    | 33.96    | 37.47    | 35.13    |
| TC0900002481.mm.1       |                        | 43.69    | 55.40    | 53.67    | 34.50    | 34.72    | 33.95    |
| TC1400002787.mm.1       | Gm3002                 | 53.50    | 49.54    | 46.89    | 37.71    | 33.86    | 39.27    |
| TC1100002337.mm.1       |                        | 34.06    | 44.05    | 41.70    | 24.50    | 26.29    | 26.81    |
| TC0300002789.mm.1       |                        | 68.77    | 71.96    | 57.35    | 41.55    | 30.23    | 37.24    |
| TC0100002795.mm.1       | Gm26683                | 116.14   | 126.21   | 131.67   | 96.57    | 98.14    | 104.07   |
| TC170000126.mm.1        | Gm19270                | 190.58   | 197.35   | 197.95   | 126.98   | 81.49    | 92.90    |
| TC1600001297.mm.1       |                        | 218.21   | 265.88   | 236.67   | 173.82   | 156.82   | 176.01   |
| TC1700000211.mm.1       | Spaca6; Mir125a        | 160.48   | 183.77   | 158.85   | 113.17   | 97.62    | 122.02   |
| TC0900003315.mm.1       |                        | 105.64   | 112.28   | 103.24   | 63.00    | 44.03    | 64.13    |
| TC1100003901.mm.1       | Gm11663                | 841.97   | 958.00   | 780.55   | 644.07   | 580.36   | 594.09   |
| TC1900000086.mm.1       |                        | 45.87    | 63.51    | 67.23    | 28.07    | 20.80    | 28.94    |
| TC1700002141.mm.1       |                        | 40.83    | 55.54    | 42.13    | 26.14    | 28.43    | 24.10    |
| TC0400000845.mm.1       |                        | 40.10    | 45.31    | 52.54    | 23.65    | 29.37    | 28.28    |
| TC1800001481.mm.1       | Mir694                 | 21.24    | 27.62    | 31.22    | 11.06    | 12.95    | 14.72    |
| TC1000001267.mm.1       |                        | 33.81    | 33.96    | 31.48    | 23.27    | 26.81    | 26.41    |
| TC0400002425.mm.1       | Gm25581                | 1257.50  | 1170.92  | 1196.38  | 964.14   | 857.16   | 777.07   |
| TC0200001961.mm.1       |                        | 129.55   | 135.27   | 126.57   | 112.34   | 102.00   | 98.35    |
| TC0600003456.mm.1       | Far2os1; RP23-285C21.5 | 51.38    | 50.02    | 61.63    | 37.13    | 38.36    | 33.18    |
| TC1800000934.mm.1       | Gm26682                | 43.76    | 43.31    | 38.41    | 33.73    | 33.95    | 33.26    |
| TC1900001046.mm.1       |                        | 150.23   | 196.11   | 146.87   | 101.67   | 102.17   | 100.48   |
| TC0500001652.mm.1       |                        | 221.58   | 250.40   | 301.06   | 161.38   | 163.05   | 162.58   |
| TC0200002650.mm.1       |                        | 23.58    | 27.74    | 25.42    | 18.49    | 19.03    | 20.38    |
| TC1800000725.mm.1       |                        | 139.11   | 149.77   | 100.64   | 60.37    | 41.77    | 59.97    |
| TC1100000443.mm.1       |                        | 237.34   | 345.22   | 218.19   | 122.46   | 74.56    | 79.41    |
| TC0100000155.mm.1       |                        | 231.59   | 346.50   | 253.55   | 128.25   | 118.42   | 152.18   |
| TSUnmapped00000171.mm.1 | Rnu1b2                 | 23427.77 | 19029.31 | 23321.93 | 13515.29 | 9736.69  | 12557.66 |
| TSUnmapped00000185.mm.1 | Rnu1b1                 | 23427.77 | 19029.31 | 23321.93 | 13515.29 | 9736.69  | 12557.66 |
| TC0100002872.mm.1       |                        | 528.78   | 663.85   | 549.31   | 358.00   | 264.10   | 340.40   |
| TC1800000032.mm.1       |                        | 43.62    | 61.96    | 52.74    | 23.63    | 31.26    | 23.59    |
| TC0100001194.mm.1       |                        | 66.95    | 74.39    | 71.42    | 52.30    | 49.28    | 58.05    |
| TC0200001893.mm.1       |                        | 3100.23  | 3643.38  | 3402.62  | 2392.10  | 2644.23  | 2593.63  |
| TC1200002378.mm.1       |                        | 730.49   | 782.15   | 787.71   | 358.64   | 172.16   | 273.95   |
| TC1800001646.mm.1       |                        | 43.63    | 47.64    | 46.09    | 33.20    | 37.61    | 31.48    |
| TC0X00000393.mm.1       |                        | 222.06   | 248.12   | 207.29   | 68.36    | 44.40    | 99.69    |
| TC0400000202.mm.1       | Gm11886; RP23-335F19.1 | 817.65   | 863.91   | 776.26   | 549.19   | 463.20   | 604.85   |
| TC1900000383.mm.1       | Gm9938                 | 203.78   | 261.40   | 176.61   | 123.87   | 102.94   | 106.00   |
| TC1200000170.mm.1       | Gm22189                | 13157.38 | 15024.61 | 17111.24 | 9442.58  | 10554.14 | 9641.55  |
| TC0500003558.mm.1       | Gm20635; RP23-372N19.1 | 14.93    | 15.10    | 13.82    | 12.65    | 11.55    | 11.79    |
| TC1600000344.mm.1       |                        | 42.83    | 51.59    | 48.05    | 35.79    | 35.08    | 36.54    |
| TC1700000324.mm.1       | Mir5125                | 2613.97  | 2712.72  | 2438.93  | 1552.65  | 1453.12  | 1930.37  |
| TC1100002499.mm.1       |                        | 61.71    | 84.74    | 70.77    | 39.10    | 36.00    | 45.81    |
| TC1900001370.mm.1       |                        | 23.53    | 27.35    | 21.98    | 16.52    | 13.59    | 16.25    |
| TC0300002941.mm.1       |                        | 36.49    | 32.68    | 35.92    | 23.55    | 26.53    | 27.77    |
| TC1100002581.mm.1       | Gm12158; RP23-103H9.4  | 51.24    | 70.04    | 49.18    | 26.15    | 26.64    | 33.14    |
| TC0200004092.mm.1       |                        | 98.75    | 116.26   | 88.46    | 61.74    | 62.43    | 69.71    |
| TC0300001480.mm.1       | Gm17501                | 97.49    | 109.33   | 93.99    | 71.81    | 66.31    | 78.21    |

|                   |                        |          |          |          |          |          |          |
|-------------------|------------------------|----------|----------|----------|----------|----------|----------|
| TC1400002434.mm.1 |                        | 66.36    | 73.95    | 66.24    | 56.20    | 48.46    | 50.95    |
| TC0600002017.mm.1 |                        | 61.67    | 54.28    | 59.73    | 41.24    | 43.55    | 47.59    |
| TC0500000342.mm.1 | E230008O15Rik          | 80.14    | 92.79    | 71.70    | 55.35    | 56.05    | 56.01    |
| TC1200001193.mm.1 | Mir453                 | 25.38    | 21.26    | 23.30    | 15.05    | 17.80    | 15.03    |
| TC0900000217.mm.1 |                        | 39.42    | 35.03    | 38.67    | 27.18    | 30.78    | 29.47    |
| TC0900000083.mm.1 |                        | 209.12   | 203.82   | 182.04   | 124.96   | 116.34   | 149.16   |
| TC0200001401.mm.1 |                        | 117.32   | 150.61   | 159.91   | 80.38    | 86.63    | 90.17    |
| TC1100002321.mm.1 | Gm12040                | 185.35   | 212.96   | 193.67   | 137.35   | 123.61   | 152.19   |
| TC0500001899.mm.1 |                        | 55.15    | 63.47    | 61.29    | 32.09    | 28.47    | 41.18    |
| TC0300001440.mm.1 |                        | 20.20    | 21.50    | 17.62    | 14.92    | 13.72    | 14.45    |
| TC1200000558.mm.1 |                        | 26791.70 | 28573.74 | 25203.26 | 19221.48 | 15269.96 | 19005.59 |
| TC0900002626.mm.1 |                        | 34.52    | 33.98    | 29.82    | 17.72    | 18.20    | 23.59    |
| TC1200001153.mm.1 |                        | 28.44    | 34.70    | 37.33    | 15.51    | 21.40    | 17.41    |
| TC0500000086.mm.1 |                        | 40.37    | 41.56    | 40.19    | 29.32    | 22.73    | 20.44    |
| TC0700001445.mm.1 |                        | 142.18   | 145.09   | 123.33   | 93.13    | 79.55    | 99.30    |
| TC0800002299.mm.1 |                        | 9744.94  | 11418.92 | 9453.27  | 5645.28  | 6981.83  | 6916.84  |
| TC0X00000324.mm.1 | Gm6274                 | 1881.19  | 1841.22  | 2206.69  | 1266.79  | 966.30   | 1270.55  |
| TC0100000173.mm.1 |                        | 13710.75 | 13472.22 | 13788.02 | 9198.54  | 6148.52  | 7871.20  |
| TC0X00002477.mm.1 | Gm8666                 | 553.17   | 566.32   | 523.90   | 418.05   | 470.60   | 413.91   |
| TC0900002210.mm.1 | Gm24646                | 186.99   | 170.72   | 158.17   | 122.86   | 123.90   | 102.14   |
| TC1800001374.mm.1 |                        | 62.00    | 58.70    | 61.12    | 43.31    | 30.02    | 34.76    |
| TC0500001119.mm.1 | Gm8473                 | 12.00    | 11.93    | 12.78    | 9.26     | 10.40    | 8.94     |
| TC0300000650.mm.1 |                        | 2674.75  | 2774.75  | 2798.77  | 1876.04  | 1415.67  | 1889.95  |
| TC1500001627.mm.1 |                        | 61.85    | 74.81    | 60.77    | 38.03    | 41.78    | 46.88    |
| TC1400002321.mm.1 |                        | 25.82    | 24.91    | 23.90    | 17.26    | 16.38    | 20.21    |
| TC0100002545.mm.1 |                        | 363.97   | 379.62   | 297.85   | 167.60   | 122.11   | 195.84   |
| TC0X00000602.mm.1 | Gm14693; RP23-24K4.3   | 70.19    | 79.60    | 84.50    | 50.69    | 53.99    | 59.57    |
| TC0400002450.mm.1 | Mir5123                | 1976.66  | 2345.94  | 1837.70  | 1053.63  | 993.68   | 1363.95  |
| TC0700004139.mm.1 |                        | 19.04    | 19.16    | 18.24    | 12.37    | 13.25    | 15.37    |
| TC1400002250.mm.1 |                        | 95.97    | 101.19   | 68.93    | 48.93    | 42.43    | 48.48    |
| TC1000000115.mm.1 |                        | 16021.84 | 17318.72 | 16874.65 | 11250.65 | 8150.46  | 10900.25 |
| TC0X00001171.mm.1 |                        | 12983.16 | 12462.14 | 12241.50 | 8920.40  | 7106.23  | 9201.02  |
| TC0900001636.mm.1 |                        | 27.42    | 29.23    | 29.15    | 19.99    | 18.46    | 23.10    |
| TC1100000445.mm.1 |                        | 45.82    | 63.74    | 54.71    | 26.63    | 34.24    | 30.35    |
| TC0400002749.mm.1 | Rpsa-ps11              | 223.66   | 196.52   | 205.38   | 173.24   | 159.93   | 154.32   |
| TC0200005014.mm.1 | Mir5111                | 67793.02 | 60342.27 | 58775.57 | 47999.94 | 41390.45 | 47259.96 |
| TC1000001966.mm.1 | Gm7909                 | 134.86   | 148.73   | 143.96   | 115.71   | 103.10   | 95.03    |
| TC0900000892.mm.1 | Rora                   | 71.35    | 73.35    | 67.96    | 55.27    | 53.92    | 61.37    |
| TC0300001636.mm.1 |                        | 53.57    | 65.45    | 58.29    | 43.04    | 34.93    | 39.79    |
| TC0300002464.mm.1 | Gm24920                | 75.38    | 62.49    | 78.50    | 39.70    | 44.49    | 50.25    |
| TC1300001230.mm.1 | Gm10737                | 233.14   | 332.55   | 183.32   | 86.32    | 112.44   | 87.39    |
| TC0400001254.mm.1 | Gm12953; RP23-233B9.5  | 45.65    | 53.20    | 51.70    | 36.90    | 34.29    | 29.14    |
| TC0400000538.mm.1 | Gm12437; RP23-141C15.4 | 244.25   | 218.74   | 206.95   | 158.23   | 142.26   | 171.11   |
| TC0400001903.mm.1 | Gm13135                | 23.15    | 26.42    | 25.61    | 20.94    | 20.23    | 19.98    |
| TC1500001291.mm.1 |                        | 18.67    | 19.74    | 21.92    | 15.56    | 15.99    | 14.50    |
| TC0500002030.mm.1 |                        | 47.65    | 52.85    | 50.72    | 37.34    | 40.29    | 42.42    |
| TC0700000828.mm.1 |                        | 100.93   | 78.63    | 95.04    | 64.53    | 56.45    | 53.89    |
| TC0500001003.mm.1 |                        | 393.14   | 607.95   | 378.94   | 219.50   | 217.82   | 201.28   |
| TC0700002074.mm.1 | Gm26143                | 251.52   | 234.75   | 166.50   | 100.06   | 100.10   | 122.00   |
| TC0500002352.mm.1 |                        | 78.29    | 102.02   | 84.01    | 59.77    | 46.57    | 49.70    |
| TC1600001288.mm.1 | Gm24927                | 20.67    | 19.98    | 22.69    | 17.61    | 15.80    | 16.41    |
| TC0400003428.mm.1 | Gm12956                | 14.58    | 16.08    | 17.34    | 11.63    | 12.76    | 11.62    |
| TC1800000307.mm.1 |                        | 41.87    | 57.17    | 44.63    | 24.94    | 27.89    | 30.53    |
| TC1200001151.mm.1 | DQ267102               | 9602.52  | 7301.84  | 9210.08  | 5544.22  | 4006.70  | 4643.29  |
| TC1200000179.mm.1 | Gm19960                | 167.97   | 181.81   | 148.72   | 117.63   | 96.60    | 115.52   |
| TC0900000574.mm.1 |                        | 129.94   | 146.21   | 107.10   | 79.47    | 81.34    | 83.45    |
| TC0200001153.mm.1 |                        | 23.17    | 20.43    | 23.14    | 18.44    | 17.85    | 17.52    |
| TC1100003400.mm.1 | Rpl9-ps1               | 914.94   | 943.03   | 1060.47  | 705.79   | 615.66   | 743.83   |
| TC1300002635.mm.1 |                        | 164.22   | 149.34   | 137.05   | 77.95    | 104.63   | 74.50    |
| TC0X00003163.mm.1 |                        | 35.68    | 41.25    | 40.65    | 31.34    | 29.35    | 31.26    |
| TC1300001232.mm.1 |                        | 29.54    | 32.07    | 26.44    | 22.89    | 20.80    | 20.71    |
| TC0500001968.mm.1 | Gm24054                | 46.18    | 54.83    | 56.24    | 34.23    | 34.51    | 39.51    |
| TC0400002118.mm.1 |                        | 345.14   | 379.99   | 353.53   | 230.71   | 156.73   | 217.03   |
| TC0X00001346.mm.1 | Gm8019                 | 588.72   | 498.06   | 493.40   | 407.39   | 363.03   | 372.26   |
| TC0100002268.mm.1 | Gm24180                | 52.44    | 45.02    | 47.53    | 39.66    | 37.56    | 36.85    |
| TC0100001325.mm.1 |                        | 394.98   | 557.89   | 473.78   | 231.60   | 167.39   | 257.65   |
| TC0100001326.mm.1 |                        | 394.98   | 557.89   | 473.78   | 231.60   | 167.39   | 257.65   |
| TC0100001327.mm.1 |                        | 394.98   | 557.89   | 473.78   | 231.60   | 167.39   | 257.65   |
| TC0200001569.mm.1 |                        | 394.98   | 557.89   | 473.78   | 231.60   | 167.39   | 257.65   |
| TC0200001615.mm.1 |                        | 394.98   | 557.89   | 473.78   | 231.60   | 167.39   | 257.65   |
| TC0800000456.mm.1 |                        | 394.98   | 557.89   | 473.78   | 231.60   | 167.39   | 257.65   |
| TC0X00000800.mm.1 |                        | 394.98   | 557.89   | 473.78   | 231.60   | 167.39   | 257.65   |
| TC0X00001094.mm.1 |                        | 394.98   | 557.89   | 473.78   | 231.60   | 167.39   | 257.65   |
| TC0X00001200.mm.1 |                        | 394.98   | 557.89   | 473.78   | 231.60   | 167.39   | 257.65   |
| TC1000001319.mm.1 |                        | 394.98   | 557.89   | 473.78   | 231.60   | 167.39   | 257.65   |
| TC1000002465.mm.1 |                        | 394.98   | 557.89   | 473.78   | 231.60   | 167.39   | 257.65   |
| TC1200000168.mm.1 |                        | 394.98   | 557.89   | 473.78   | 231.60   | 167.39   | 257.65   |
| TC1200001486.mm.1 |                        | 394.98   | 557.89   | 473.78   | 231.60   | 167.39   | 257.65   |
| TC1200001838.mm.1 |                        | 394.98   | 557.89   | 473.78   | 231.60   | 167.39   | 257.65   |
| TC1200002489.mm.1 |                        | 394.98   | 557.89   | 473.78   | 231.60   | 167.39   | 257.65   |

|                   |                                  |          |          |          |          |          |          |
|-------------------|----------------------------------|----------|----------|----------|----------|----------|----------|
| TC160000722.mm.1  |                                  | 394.98   | 557.89   | 473.78   | 231.60   | 167.39   | 257.65   |
| TC1800001393.mm.1 |                                  | 394.98   | 557.89   | 473.78   | 231.60   | 167.39   | 257.65   |
| TC1900001143.mm.1 |                                  | 394.98   | 557.89   | 473.78   | 231.60   | 167.39   | 257.65   |
| TC0200003871.mm.1 |                                  | 98.10    | 119.14   | 107.24   | 70.31    | 74.58    | 82.87    |
| TC1500001512.mm.1 |                                  | 133.85   | 126.13   | 114.60   | 87.99    | 65.28    | 80.80    |
| TC0800001059.mm.1 |                                  | 28.81    | 25.45    | 30.76    | 22.18    | 20.47    | 20.83    |
| TC0700003814.mm.1 |                                  | 75.89    | 75.97    | 76.26    | 52.65    | 47.96    | 61.54    |
| TC0700001418.mm.1 |                                  | 150.32   | 209.40   | 164.72   | 84.87    | 78.39    | 108.06   |
| TC020000746.mm.1  |                                  | 34.90    | 42.51    | 38.64    | 25.98    | 29.23    | 24.09    |
| TC0100000838.mm.1 | Gm15372                          | 68.44    | 68.78    | 66.43    | 56.08    | 44.94    | 48.12    |
| TC0500000123.mm.1 |                                  | 40.53    | 40.22    | 34.09    | 26.60    | 29.53    | 25.44    |
| TC0100000051.mm.1 |                                  | 8093.93  | 10080.92 | 9294.98  | 6418.03  | 4839.94  | 4867.53  |
| TC0500002011.mm.1 |                                  | 87.72    | 116.96   | 88.54    | 63.53    | 54.72    | 59.53    |
| TC1300000155.mm.1 |                                  | 51.04    | 82.29    | 70.11    | 36.08    | 32.05    | 30.60    |
| TC0400000737.mm.1 |                                  | 27.56    | 44.40    | 28.73    | 15.67    | 15.77    | 16.13    |
| TC0200003567.mm.1 | Gm13532                          | 2978.87  | 2611.21  | 3425.11  | 1933.35  | 1927.90  | 2131.39  |
| TC1900000288.mm.1 |                                  | 54.26    | 67.25    | 48.08    | 34.21    | 33.54    | 36.39    |
| TC0200002845.mm.1 |                                  | 18.19    | 16.57    | 15.22    | 12.83    | 11.17    | 12.45    |
| TC0800002345.mm.1 |                                  | 16.65    | 14.12    | 16.70    | 11.58    | 10.40    | 12.02    |
| TC1600001717.mm.1 |                                  | 25948.81 | 30397.81 | 29701.57 | 21345.87 | 16770.52 | 19398.67 |
| TC1700001338.mm.1 |                                  | 585.29   | 755.96   | 586.81   | 422.18   | 383.42   | 328.85   |
| TC1200000518.mm.1 |                                  | 292.87   | 393.73   | 291.63   | 206.11   | 181.75   | 199.28   |
| TC0300000793.mm.1 |                                  | 178.40   | 204.74   | 215.39   | 156.30   | 145.27   | 143.34   |
| TC1000002860.mm.1 |                                  | 24.76    | 31.87    | 25.13    | 15.71    | 18.87    | 16.80    |
| TC1600001669.mm.1 |                                  | 471.65   | 755.38   | 530.88   | 212.42   | 170.00   | 285.28   |
| TC1200000344.mm.1 |                                  | 31.99    | 27.16    | 29.16    | 22.37    | 23.99    | 22.63    |
| TC0X00000162.mm.1 | Gm15027                          | 7881.24  | 8052.52  | 7337.62  | 6379.33  | 5289.95  | 5838.36  |
| TC0X00000163.mm.1 | Gm14536                          | 7881.24  | 8052.52  | 7337.62  | 6379.33  | 5289.95  | 5838.36  |
| TC1700002607.mm.1 |                                  | 440.90   | 567.56   | 456.55   | 166.68   | 185.03   | 284.79   |
| TC1400001509.mm.1 | Gm20699                          | 67.29    | 72.90    | 59.70    | 45.43    | 51.39    | 44.42    |
| TC0800002365.mm.1 |                                  | 188.86   | 182.45   | 162.95   | 131.15   | 121.09   | 142.38   |
| TC0700004594.mm.1 |                                  | 25870.16 | 28346.22 | 27458.91 | 18254.75 | 11509.71 | 14091.98 |
| TC0200000865.mm.1 | Gm13519; RP23-35D6.1             | 781.42   | 819.30   | 641.40   | 536.81   | 454.69   | 472.42   |
| TC1300000941.mm.1 |                                  | 23.85    | 22.71    | 24.08    | 18.08    | 16.00    | 19.45    |
| TC1100000482.mm.1 | Gm12174                          | 11607.08 | 9968.13  | 11406.52 | 7819.58  | 7340.70  | 8700.48  |
| TC0100000843.mm.1 | Gm15368                          | 105.21   | 101.59   | 103.22   | 74.09    | 61.10    | 79.60    |
| TC0400003367.mm.1 |                                  | 5012.43  | 5096.13  | 5111.66  | 3451.42  | 2512.73  | 2159.84  |
| TC0100001666.mm.1 |                                  | 32.64    | 32.00    | 35.45    | 25.38    | 28.29    | 24.58    |
| TC0600000189.mm.1 |                                  | 25.67    | 27.35    | 24.39    | 20.69    | 20.09    | 17.53    |
| TC1100001762.mm.1 | Gm11652                          | 75.58    | 63.72    | 67.96    | 54.20    | 55.39    | 52.64    |
| TC0900002636.mm.1 | BC065403                         | 34.88    | 34.22    | 36.34    | 26.86    | 24.75    | 29.74    |
| TC0800002479.mm.1 |                                  | 45.80    | 73.57    | 60.02    | 30.55    | 31.80    | 29.82    |
| TC0100000781.mm.1 |                                  | 97.76    | 110.06   | 96.70    | 76.59    | 66.62    | 79.28    |
| TC1600001670.mm.1 |                                  | 101.40   | 114.30   | 101.61   | 58.76    | 77.68    | 56.19    |
| TC1200000827.mm.1 | Prox2os; RP24-89J3.3;<br>Gm19357 | 50.12    | 53.54    | 51.92    | 44.38    | 38.59    | 37.55    |
| TC0X00003080.mm.1 | Gm7091                           | 1939.56  | 1799.83  | 1900.67  | 1427.28  | 1504.22  | 1222.00  |
| TC0900001794.mm.1 |                                  | 20.27    | 25.94    | 20.25    | 15.26    | 13.09    | 12.26    |
| TC1600000356.mm.1 | Morf4I1-ps1                      | 96.37    | 128.81   | 89.10    | 59.38    | 63.15    | 60.04    |
| TC1800001644.mm.1 |                                  | 66.00    | 107.88   | 77.82    | 40.43    | 32.40    | 41.88    |
| TC0100001695.mm.1 |                                  | 60.11    | 79.12    | 88.30    | 32.05    | 44.19    | 30.73    |
| TC0X00002363.mm.1 | Gm14689; RP23-24K4.2             | 575.88   | 709.03   | 540.33   | 354.67   | 289.37   | 392.54   |
| TC0100000837.mm.1 | Gm15373                          | 86.66    | 104.62   | 83.38    | 56.18    | 63.43    | 65.45    |
| TC0300000439.mm.1 |                                  | 250.53   | 248.09   | 262.37   | 139.10   | 110.90   | 173.02   |
| TC0600001731.mm.1 |                                  | 250.53   | 248.09   | 262.37   | 139.10   | 110.90   | 173.02   |
| TC0600002537.mm.1 |                                  | 250.53   | 248.09   | 262.37   | 139.10   | 110.90   | 173.02   |
| TC0600003306.mm.1 |                                  | 250.53   | 248.09   | 262.37   | 139.10   | 110.90   | 173.02   |
| TC0900002567.mm.1 |                                  | 250.53   | 248.09   | 262.37   | 139.10   | 110.90   | 173.02   |
| TC0X00000379.mm.1 |                                  | 250.53   | 248.09   | 262.37   | 139.10   | 110.90   | 173.02   |
| TC0X00003344.mm.1 |                                  | 250.53   | 248.09   | 262.37   | 139.10   | 110.90   | 173.02   |
| TC1400001128.mm.1 |                                  | 250.53   | 248.09   | 262.37   | 139.10   | 110.90   | 173.02   |
| TC1400002705.mm.1 |                                  | 250.53   | 248.09   | 262.37   | 139.10   | 110.90   | 173.02   |
| TC1500000481.mm.1 |                                  | 250.53   | 248.09   | 262.37   | 139.10   | 110.90   | 173.02   |
| TC1800000768.mm.1 |                                  | 250.53   | 248.09   | 262.37   | 139.10   | 110.90   | 173.02   |
| TC1800001570.mm.1 |                                  | 250.53   | 248.09   | 262.37   | 139.10   | 110.90   | 173.02   |
| TC1900001634.mm.1 |                                  | 250.53   | 248.09   | 262.37   | 139.10   | 110.90   | 173.02   |
| TC0600002152.mm.1 |                                  | 22030.11 | 21241.13 | 22379.78 | 16633.40 | 11945.94 | 13340.63 |
| TC0300000391.mm.1 |                                  | 61.98    | 93.65    | 61.15    | 37.54    | 32.79    | 26.87    |
| TC1300000109.mm.1 |                                  | 24.97    | 26.10    | 22.94    | 20.14    | 17.25    | 18.94    |
| TC0100001538.mm.1 | Gm22992                          | 37182.27 | 43898.46 | 41036.86 | 28838.65 | 30677.53 | 32699.49 |
| TC0100001819.mm.1 | Gm24092                          | 37182.27 | 43898.46 | 41036.86 | 28838.65 | 30677.53 | 32699.49 |
| TC0400003225.mm.1 | Gm25123                          | 37182.27 | 43898.46 | 41036.86 | 28838.65 | 30677.53 | 32699.49 |
| TC0X00000510.mm.1 | Gm22103                          | 37182.27 | 43898.46 | 41036.86 | 28838.65 | 30677.53 | 32699.49 |
| TC1400001826.mm.1 | Gm25892                          | 37182.27 | 43898.46 | 41036.86 | 28838.65 | 30677.53 | 32699.49 |
| TC1400001836.mm.1 | Gm23620                          | 37182.27 | 43898.46 | 41036.86 | 28838.65 | 30677.53 | 32699.49 |
| TC1400001901.mm.1 | Gm25353                          | 37182.27 | 43898.46 | 41036.86 | 28838.65 | 30677.53 | 32699.49 |
| TC0100001544.mm.1 |                                  | 78.32    | 90.44    | 103.17   | 63.53    | 51.38    | 54.31    |
| TC1300002591.mm.1 |                                  | 38.03    | 63.29    | 55.05    | 24.73    | 25.59    | 25.18    |
| TC0600000589.mm.1 |                                  | 423.90   | 577.27   | 442.40   | 293.99   | 274.71   | 314.64   |
| TC0700000253.mm.1 |                                  | 2055.36  | 2199.72  | 2212.44  | 1564.72  | 1109.60  | 1092.40  |

|                   |                        |          |          |          |          |          |          |
|-------------------|------------------------|----------|----------|----------|----------|----------|----------|
| TC1200000333.mm.1 |                        | 82.05    | 71.18    | 54.12    | 38.31    | 31.88    | 26.05    |
| TC0X00000874.mm.1 | Gm14778; RP23-335N15.2 | 476.24   | 439.96   | 464.63   | 325.34   | 252.12   | 332.20   |
| TC1700000690.mm.1 |                        | 5782.87  | 5516.52  | 5923.29  | 3496.78  | 2151.98  | 3160.82  |
| TC0X00000232.mm.1 | Gm25812                | 138.43   | 116.33   | 109.75   | 89.45    | 86.00    | 85.80    |
| TC1600001958.mm.1 |                        | 34.10    | 35.34    | 31.55    | 22.14    | 24.28    | 27.25    |
| TC0300002588.mm.1 |                        | 29.52    | 32.69    | 34.58    | 25.40    | 23.55    | 26.02    |
| TC0200005374.mm.1 |                        | 26.58    | 33.44    | 30.90    | 20.95    | 21.79    | 22.60    |
| TC0900000886.mm.1 |                        | 288.86   | 272.77   | 296.89   | 195.41   | 237.27   | 215.87   |
| TC0500002511.mm.1 |                        | 81.40    | 77.42    | 76.97    | 65.09    | 52.58    | 53.73    |
| TC1800000716.mm.1 |                        | 30.84    | 25.60    | 30.16    | 22.03    | 21.83    | 20.22    |
| TC1300002480.mm.1 |                        | 53.32    | 51.76    | 57.36    | 41.45    | 37.26    | 44.57    |
| TC0100003267.mm.1 | Gm7278                 | 68.84    | 71.01    | 57.32    | 44.48    | 43.46    | 49.48    |
| TC1600001614.mm.1 | Gm15530                | 267.27   | 256.47   | 278.85   | 186.33   | 181.43   | 221.99   |
| TC0400000182.mm.1 |                        | 28.30    | 31.73    | 29.91    | 25.42    | 23.04    | 22.12    |
| TC1000000070.mm.1 | Gm25682                | 24345.99 | 23393.09 | 26748.34 | 17794.91 | 12467.58 | 15033.82 |
| TC0600001240.mm.1 |                        | 126.12   | 159.00   | 142.70   | 88.32    | 61.75    | 85.16    |
| TC0100001709.mm.1 |                        | 45.42    | 56.92    | 51.68    | 30.83    | 33.39    | 37.97    |
| TC0800000636.mm.1 | Gm26905                | 1982.83  | 2742.02  | 2058.85  | 1265.23  | 767.42   | 1005.37  |
| TC0200003472.mm.1 |                        | 71.82    | 96.08    | 69.07    | 49.61    | 45.76    | 48.28    |
| TC1800000054.mm.1 | Gm7502                 | 365.88   | 344.51   | 377.08   | 312.90   | 272.93   | 277.55   |
| TC0700003883.mm.1 | Gm23550                | 46322.02 | 55267.10 | 49379.36 | 35232.19 | 39962.36 | 37660.28 |
| TC0400002602.mm.1 |                        | 5142.97  | 5523.00  | 5179.58  | 3497.21  | 3465.79  | 2479.06  |
| TC0400004024.mm.1 | Gm13204                | 126.79   | 130.15   | 120.09   | 109.99   | 98.38    | 97.03    |
| TC1700002611.mm.1 |                        | 133.42   | 144.84   | 131.89   | 88.96    | 72.17    | 100.13   |
| TC0900000897.mm.1 |                        | 54.59    | 54.69    | 50.30    | 24.70    | 36.66    | 32.17    |
| TC0X00003094.mm.1 | Gm15298; RP23-232B3.4  | 599.99   | 735.46   | 843.18   | 405.23   | 417.98   | 477.83   |
| TC0700000455.mm.1 |                        | 89.22    | 68.72    | 70.95    | 46.89    | 43.15    | 53.07    |
| TC0200000774.mm.1 | Gm13468; RP23-103G12.1 | 291.89   | 296.25   | 319.23   | 209.04   | 223.49   | 252.59   |
| TC0400001834.mm.1 | Gm13086; RP23-451D4.10 | 47.25    | 40.97    | 44.90    | 36.69    | 32.92    | 31.95    |
| TC0200000638.mm.1 | Gm13443                | 1891.57  | 1673.66  | 1308.52  | 1018.03  | 906.96   | 947.20   |
| TC1700002704.mm.1 |                        | 902.97   | 1067.78  | 703.85   | 487.10   | 518.93   | 501.70   |
| TC1300000441.mm.1 | Gm27387                | 292.61   | 297.58   | 289.20   | 253.73   | 214.26   | 215.94   |
| TC0900002646.mm.1 | LOC100861984           | 410.82   | 353.66   | 337.10   | 285.15   | 262.38   | 271.49   |
| TC0400001511.mm.1 |                        | 90.73    | 94.31    | 94.85    | 68.79    | 65.93    | 79.69    |
| TC1400001304.mm.1 |                        | 80.41    | 92.97    | 81.62    | 55.23    | 56.02    | 67.31    |
| TC0800001364.mm.1 |                        | 31.11    | 32.66    | 33.27    | 23.75    | 25.48    | 19.95    |
| TC1700001324.mm.1 |                        | 21.29    | 22.58    | 21.08    | 17.41    | 14.06    | 13.46    |
| TC0300001305.mm.1 |                        | 64.05    | 66.69    | 65.60    | 46.84    | 51.85    | 56.00    |
| TC1300000419.mm.1 |                        | 284.00   | 348.77   | 326.12   | 247.55   | 217.77   | 226.67   |
| TC0100001575.mm.1 | Gm26110                | 19928.76 | 16798.67 | 20696.59 | 11931.37 | 7074.06  | 7779.75  |
| TC1200001143.mm.1 | Mir341                 | 53.42    | 65.47    | 62.75    | 35.65    | 23.27    | 34.41    |
| TC0500002049.mm.1 |                        | 43.24    | 34.97    | 41.71    | 29.68    | 29.31    | 29.66    |
| TC1700001179.mm.1 |                        | 195.42   | 142.73   | 132.39   | 81.97    | 83.70    | 94.90    |
| TC0900001218.mm.1 | C430002N11Rik          | 247.70   | 212.36   | 217.98   | 182.79   | 159.81   | 170.50   |
| TC1200001669.mm.1 |                        | 34.00    | 34.81    | 31.09    | 21.80    | 25.44    | 26.38    |
| TC0300001804.mm.1 | Gm15574                | 85.14    | 90.13    | 90.64    | 69.45    | 59.22    | 71.90    |
| TC0900001676.mm.1 |                        | 128.61   | 138.65   | 116.50   | 82.82    | 66.55    | 90.73    |
| TC0100003358.mm.1 |                        | 18.16    | 15.88    | 13.82    | 10.64    | 11.16    | 11.22    |
| TC1300001454.mm.1 |                        | 374.61   | 533.85   | 440.04   | 196.05   | 146.71   | 249.72   |
| TC1700000135.mm.1 |                        | 88.13    | 85.24    | 61.57    | 41.63    | 48.22    | 43.98    |
| TC0900001994.mm.1 |                        | 427.00   | 646.74   | 542.62   | 285.42   | 269.66   | 324.67   |
| TC1200001509.mm.1 | 2410018L13Rik          | 56.71    | 59.63    | 58.82    | 44.94    | 36.67    | 45.60    |
| TC1600000624.mm.1 | Gm25873                | 88.13    | 74.41    | 67.32    | 54.17    | 51.69    | 46.73    |
| TC0400002966.mm.1 |                        | 66.51    | 75.71    | 59.95    | 42.68    | 26.93    | 34.81    |
| TC0200004091.mm.1 |                        | 208.95   | 265.69   | 208.13   | 125.16   | 158.26   | 140.13   |
| TC0400000203.mm.1 | Gm11887; RP23-335F19.2 | 474.55   | 547.17   | 431.14   | 335.43   | 351.54   | 358.46   |
| TC0700003422.mm.1 |                        | 31.75    | 33.02    | 32.32    | 24.77    | 21.54    | 18.00    |
| TC0600002649.mm.1 |                        | 35.54    | 37.02    | 32.43    | 26.82    | 26.50    | 29.57    |
| TC0800001817.mm.1 |                        | 158.12   | 133.26   | 143.84   | 110.17   | 113.30   | 118.02   |
| TC0100002352.mm.1 |                        | 44.87    | 55.27    | 46.04    | 34.02    | 36.39    | 30.88    |
| TC0800002074.mm.1 |                        | 88.15    | 82.87    | 59.23    | 44.63    | 43.25    | 40.98    |
| TC0600000639.mm.1 | Gm25818                | 3375.23  | 3552.76  | 3628.99  | 2282.39  | 1318.63  | 1437.91  |
| TC1400000312.mm.1 |                        | 84.63    | 85.80    | 75.39    | 57.02    | 46.08    | 60.44    |
| TC0500000140.mm.1 |                        | 53.51    | 56.81    | 41.95    | 30.42    | 28.92    | 34.59    |
| TC0700003633.mm.1 |                        | 1448.90  | 1778.25  | 1353.60  | 1021.32  | 749.52   | 896.56   |
| TC1500002104.mm.1 |                        | 25.75    | 32.64    | 28.17    | 19.00    | 19.32    | 14.83    |
| TC0100000441.mm.1 |                        | 60.72    | 70.43    | 68.58    | 47.57    | 48.31    | 54.68    |
| TC0100000938.mm.1 |                        | 70.20    | 68.22    | 62.08    | 41.44    | 44.72    | 53.21    |
| TC1700002387.mm.1 |                        | 30.09    | 40.32    | 33.25    | 23.45    | 20.49    | 23.27    |
| TC0200001155.mm.1 |                        | 3839.21  | 4693.98  | 3947.28  | 2913.99  | 2552.06  | 3093.07  |
| TC1300001235.mm.1 |                        | 15.96    | 25.38    | 20.17    | 11.14    | 9.89     | 11.39    |
| TC1800000742.mm.1 |                        | 85.58    | 73.60    | 64.24    | 47.07    | 36.55    | 47.72    |
| TC0300002902.mm.1 |                        | 23.49    | 18.38    | 22.72    | 15.34    | 14.82    | 15.38    |
| TC0X00001568.mm.1 | Gm8569                 | 11.73    | 10.26    | 12.46    | 8.60     | 9.09     | 8.67     |
| TC1000000999.mm.1 |                        | 121.71   | 252.24   | 129.06   | 57.30    | 55.29    | 40.54    |
| TC0X00000868.mm.1 | Gm14789; RP23-57115.2  | 2745.01  | 2978.94  | 2745.96  | 1652.90  | 1375.17  | 2050.88  |
| TC0200003036.mm.1 |                        | 109.21   | 128.96   | 97.10    | 59.48    | 49.71    | 73.28    |
| TC1600001496.mm.1 | Hmgb1-ps6              | 5240.59  | 5322.07  | 5203.68  | 4492.97  | 3707.42  | 3702.88  |
| TC1800000012.mm.1 |                        | 103.65   | 99.56    | 88.21    | 78.43    | 78.63    | 74.33    |
| TC1600001535.mm.1 |                        | 25.66    | 30.10    | 31.00    | 18.50    | 22.42    | 19.54    |

|                   |                                            |          |          |          |          |          |          |
|-------------------|--------------------------------------------|----------|----------|----------|----------|----------|----------|
| TC0400002226.mm.1 |                                            | 32.49    | 39.08    | 35.02    | 28.29    | 24.36    | 25.86    |
| TC1700002024.mm.1 | Lgals1-ps1                                 | 36.20    | 30.15    | 34.30    | 26.92    | 23.93    | 24.72    |
| TC1200000362.mm.1 |                                            | 89.50    | 128.04   | 103.97   | 56.96    | 59.89    | 70.20    |
| TC1000001854.mm.1 | Gm26740; RP24-547D11.2                     | 47.88    | 50.98    | 50.05    | 38.38    | 36.79    | 29.76    |
| TC1000001080.mm.1 |                                            | 196.20   | 215.48   | 210.67   | 141.53   | 128.07   | 166.72   |
| TC0200003477.mm.1 |                                            | 109.29   | 141.70   | 116.64   | 56.26    | 72.40    | 79.74    |
| TC1600000668.mm.1 |                                            | 165.52   | 164.01   | 129.78   | 92.48    | 79.46    | 105.72   |
| TC0700001096.mm.1 |                                            | 4289.25  | 4527.05  | 4464.64  | 3566.96  | 2824.07  | 3350.88  |
| TC0900000576.mm.1 |                                            | 78.93    | 91.78    | 77.56    | 41.04    | 55.24    | 55.60    |
| TC0500001489.mm.1 | Gm17132                                    | 14066.66 | 14695.59 | 15274.16 | 10322.81 | 6540.44  | 8027.83  |
| TC0600001817.mm.1 | Gm8649                                     | 467.01   | 527.23   | 520.42   | 349.24   | 224.00   | 282.08   |
| TC0800000999.mm.1 |                                            | 59.48    | 64.56    | 52.95    | 44.69    | 40.29    | 45.57    |
| TC0400000605.mm.1 | Gm19609                                    | 13.31    | 16.13    | 16.84    | 10.50    | 10.07    | 11.55    |
| TC1200001316.mm.1 | Gm24741                                    | 40.09    | 48.05    | 50.65    | 32.93    | 32.33    | 27.29    |
| TC0800000886.mm.1 |                                            | 63.01    | 62.34    | 61.45    | 37.67    | 43.50    | 50.09    |
| TC1800000743.mm.1 |                                            | 38.31    | 35.91    | 34.36    | 28.09    | 22.54    | 27.44    |
| TC0700001322.mm.1 |                                            | 54.66    | 68.59    | 54.27    | 40.95    | 37.86    | 31.50    |
| TC0500002261.mm.1 |                                            | 84.25    | 108.97   | 96.78    | 71.75    | 63.64    | 60.83    |
| TC0700002681.mm.1 |                                            | 503.98   | 486.63   | 576.20   | 295.56   | 168.44   | 268.10   |
| TC0600003051.mm.1 |                                            | 27.05    | 22.74    | 26.11    | 20.28    | 19.86    | 19.91    |
| TC0200002098.mm.1 | Gm14079; RP23-139H14.3                     | 39.17    | 44.69    | 35.21    | 29.84    | 27.52    | 29.01    |
| TC1100002115.mm.1 |                                            | 67.05    | 57.76    | 50.86    | 39.48    | 30.35    | 26.81    |
| TC0600001911.mm.1 | Gm20186                                    | 630.69   | 657.87   | 673.67   | 558.32   | 515.53   | 464.50   |
| TC0900000787.mm.1 |                                            | 11.87    | 13.91    | 15.09    | 9.44     | 10.02    | 10.10    |
| TC0800001270.mm.1 |                                            | 30.23    | 28.91    | 26.71    | 23.38    | 18.94    | 19.00    |
| TC0900001505.mm.1 |                                            | 62.62    | 88.66    | 74.15    | 46.95    | 49.23    | 41.84    |
| TC1200000374.mm.1 |                                            | 15.56    | 17.49    | 20.37    | 13.11    | 11.91    | 11.62    |
| TC0100001045.mm.1 |                                            | 422.69   | 588.26   | 442.89   | 294.11   | 265.20   | 316.49   |
| TC1200001720.mm.1 |                                            | 125.26   | 107.87   | 82.16    | 59.84    | 44.21    | 56.58    |
| TC0400003947.mm.1 | Gm13121                                    | 2958.94  | 2956.73  | 2967.22  | 2619.38  | 2224.61  | 2248.99  |
| TC1000001126.mm.1 |                                            | 60.57    | 68.07    | 60.09    | 41.36    | 37.04    | 49.18    |
| TC0200002831.mm.1 |                                            | 156.98   | 172.08   | 177.09   | 136.85   | 112.86   | 129.03   |
| TC1000000106.mm.1 |                                            | 34.18    | 48.15    | 35.29    | 19.46    | 24.44    | 16.97    |
| TC0600002833.mm.1 |                                            | 78.74    | 87.72    | 102.90   | 56.54    | 64.80    | 51.47    |
| TC0200002061.mm.1 |                                            | 17.26    | 20.37    | 17.98    | 15.09    | 13.26    | 12.89    |
| TC0800000819.mm.1 |                                            | 11524.00 | 12844.29 | 12233.85 | 10425.38 | 9178.75  | 8839.85  |
| TC0900000020.mm.1 |                                            | 758.10   | 803.41   | 863.03   | 589.34   | 397.09   | 477.12   |
| TC0500001811.mm.1 |                                            | 129.39   | 176.99   | 127.65   | 86.98    | 78.30    | 93.31    |
| TC1600000633.mm.1 |                                            | 60.02    | 79.85    | 77.24    | 45.86    | 40.65    | 49.71    |
| TC1300000036.mm.1 |                                            | 2530.09  | 2499.04  | 2214.82  | 1695.40  | 1693.32  | 1272.56  |
| TC0100001321.mm.1 |                                            | 359.29   | 377.03   | 356.18   | 236.85   | 216.95   | 292.71   |
| TC0300001517.mm.1 |                                            | 359.29   | 377.03   | 356.18   | 236.85   | 216.95   | 292.71   |
| TC0800000071.mm.1 |                                            | 359.29   | 377.03   | 356.18   | 236.85   | 216.95   | 292.71   |
| TC0800000165.mm.1 |                                            | 359.29   | 377.03   | 356.18   | 236.85   | 216.95   | 292.71   |
| TC1000001265.mm.1 |                                            | 359.29   | 377.03   | 356.18   | 236.85   | 216.95   | 292.71   |
| TC1100002198.mm.1 |                                            | 359.29   | 377.03   | 356.18   | 236.85   | 216.95   | 292.71   |
| TC1300001262.mm.1 |                                            | 359.29   | 377.03   | 356.18   | 236.85   | 216.95   | 292.71   |
| TC1400001168.mm.1 |                                            | 359.29   | 377.03   | 356.18   | 236.85   | 216.95   | 292.71   |
| TC1500001159.mm.1 |                                            | 359.29   | 377.03   | 356.18   | 236.85   | 216.95   | 292.71   |
| TC1600001649.mm.1 |                                            | 359.29   | 377.03   | 356.18   | 236.85   | 216.95   | 292.71   |
| TC0700000993.mm.1 |                                            | 35.77    | 39.13    | 32.20    | 28.04    | 27.56    | 25.21    |
| TC0900000880.mm.1 |                                            | 31.71    | 31.16    | 33.87    | 24.82    | 28.19    | 24.34    |
| TC1300001181.mm.1 |                                            | 47423.25 | 51881.60 | 55097.22 | 34042.83 | 19843.48 | 21354.04 |
| TC1600000798.mm.1 |                                            | 339.87   | 379.98   | 286.79   | 208.65   | 189.02   | 239.22   |
| TC1800000751.mm.1 |                                            | 89.87    | 107.87   | 71.03    | 47.26    | 45.43    | 55.78    |
| TC1200001936.mm.1 |                                            | 40.48    | 39.35    | 30.42    | 23.11    | 23.22    | 25.79    |
| TC0400001449.mm.1 | Csf3r                                      | 233.60   | 236.32   | 209.94   | 188.79   | 161.37   | 177.91   |
| TC0900001911.mm.1 | Gm2976                                     | 3512.43  | 3603.96  | 3289.59  | 2911.75  | 2396.87  | 2675.93  |
| TC1800000720.mm.1 |                                            | 23.22    | 19.33    | 21.78    | 16.65    | 17.36    | 16.05    |
| TC0200003838.mm.1 |                                            | 76.79    | 64.00    | 64.43    | 50.71    | 36.89    | 40.41    |
| TC1600000910.mm.1 |                                            | 1146.86  | 1263.95  | 1188.34  | 945.03   | 981.96   | 812.12   |
| TC0100002881.mm.1 |                                            | 243.81   | 243.20   | 259.17   | 181.80   | 150.45   | 196.55   |
| TC1800000481.mm.1 |                                            | 225.03   | 253.59   | 217.66   | 174.75   | 137.42   | 168.14   |
| TC0900003045.mm.1 |                                            | 67.20    | 91.19    | 70.72    | 38.61    | 39.69    | 51.73    |
| TC1100002596.mm.1 | Gm16033; Gm16034; RP23-29H5.7; RP23-29H5.6 | 242.99   | 215.19   | 203.36   | 144.42   | 98.50    | 138.25   |
| TC0300001110.mm.1 | Al504432                                   | 190.54   | 201.06   | 164.85   | 109.59   | 122.35   | 141.11   |
| TC1800001604.mm.1 |                                            | 74.04    | 82.67    | 63.76    | 51.61    | 41.37    | 49.74    |
| TC0500000501.mm.1 |                                            | 54.55    | 80.21    | 82.30    | 30.05    | 34.47    | 42.13    |
| TC1500001960.mm.1 | Tbrg3                                      | 53.34    | 69.77    | 54.64    | 33.24    | 33.88    | 42.04    |
| TC0X00002196.mm.1 | Gm7834                                     | 61.03    | 57.83    | 59.17    | 51.03    | 41.60    | 43.46    |
| TC0100000340.mm.1 |                                            | 74.67    | 72.49    | 65.11    | 47.10    | 52.69    | 38.20    |
| TC0300002753.mm.1 |                                            | 75.41    | 93.37    | 84.02    | 52.99    | 48.98    | 63.83    |
| TC0700003115.mm.1 | Gm6226                                     | 85.60    | 86.17    | 77.39    | 70.14    | 60.38    | 66.20    |
| TC1900000686.mm.1 |                                            | 55.62    | 64.04    | 55.71    | 48.03    | 43.57    | 40.93    |
| TC0600003009.mm.1 |                                            | 34.72    | 34.80    | 41.73    | 19.56    | 19.70    | 27.12    |
| TC1600000363.mm.1 |                                            | 144.74   | 136.69   | 140.20   | 74.47    | 45.02    | 80.62    |
| TC0100000864.mm.1 |                                            | 48.66    | 59.45    | 59.78    | 39.20    | 42.42    | 41.75    |
| TC1000001976.mm.1 |                                            | 11724.43 | 13930.09 | 12559.86 | 9627.05  | 7045.93  | 8169.58  |
| TC1200001521.mm.1 |                                            | 64.22    | 75.57    | 59.94    | 44.67    | 41.48    | 31.49    |

|                   |                                 |           |           |           |          |          |          |
|-------------------|---------------------------------|-----------|-----------|-----------|----------|----------|----------|
| TC0100003701.mm.1 |                                 | 57.43     | 75.30     | 69.57     | 44.51    | 32.89    | 42.60    |
| TC0500000891.mm.1 |                                 | 364.66    | 352.24    | 351.90    | 267.90   | 236.23   | 298.63   |
| TC1000002214.mm.1 |                                 | 33.22     | 41.95     | 33.38     | 23.94    | 25.62    | 26.55    |
| TC1600000361.mm.1 |                                 | 159.99    | 213.10    | 154.28    | 76.48    | 112.50   | 89.29    |
| TC1600001065.mm.1 | Gm15971                         | 98.84     | 98.72     | 84.90     | 58.27    | 57.57    | 73.80    |
| TC0200002858.mm.1 | Gm13187                         | 13.59     | 15.40     | 15.98     | 12.04    | 11.82    | 10.62    |
| TC1300002367.mm.1 |                                 | 1415.53   | 1568.95   | 1949.68   | 1140.59  | 963.40   | 918.08   |
| TC1300001502.mm.1 |                                 | 43.99     | 43.37     | 52.63     | 35.05    | 28.83    | 26.32    |
| TC1800001373.mm.1 |                                 | 38.78     | 38.60     | 33.75     | 19.58    | 25.52    | 26.53    |
| TC0800003240.mm.1 | 6820431F20Rik;<br>2610005L07Rik | 1900.53   | 2033.48   | 1711.29   | 1385.59  | 1165.92  | 1443.94  |
| TC1300002476.mm.1 |                                 | 5325.91   | 5447.29   | 4569.86   | 4140.98  | 3634.36  | 3661.82  |
| TC0100001917.mm.1 |                                 | 6459.89   | 7348.58   | 7515.16   | 5786.69  | 4898.74  | 5379.25  |
| TC1800000723.mm.1 |                                 | 372.75    | 315.89    | 246.75    | 186.16   | 152.81   | 184.30   |
| TC0600000825.mm.1 |                                 | 424.25    | 534.35    | 438.78    | 312.92   | 263.53   | 335.52   |
| TC0900001970.mm.1 |                                 | 15761.62  | 16331.11  | 13709.10  | 9895.97  | 7824.15  | 10961.33 |
| TC0100003684.mm.1 |                                 | 191.12    | 198.76    | 161.40    | 117.53   | 135.34   | 138.13   |
| TC0600002933.mm.1 |                                 | 73.93     | 69.40     | 65.71     | 49.95    | 42.47    | 55.29    |
| TC1100001447.mm.1 | Gm22456                         | 41079.14  | 44148.99  | 48880.39  | 28858.48 | 17423.16 | 15955.86 |
| TC0500002304.mm.1 |                                 | 112.02    | 136.20    | 101.61    | 80.85    | 64.49    | 75.68    |
| TC0200002944.mm.1 | Gm23608                         | 73.69     | 83.70     | 90.77     | 65.46    | 61.42    | 62.91    |
| TC1400002304.mm.1 |                                 | 1413.83   | 1724.55   | 1448.32   | 994.10   | 630.76   | 872.63   |
| TC0500001094.mm.1 |                                 | 25.65     | 32.95     | 31.41     | 22.25    | 21.33    | 20.57    |
| TC0300001728.mm.1 |                                 | 18.27     | 14.99     | 14.72     | 12.24    | 11.68    | 11.50    |
| TC1800001690.mm.1 |                                 | 4349.06   | 5702.56   | 4675.22   | 3189.98  | 2450.88  | 3242.90  |
| TC1700002388.mm.1 |                                 | 69.65     | 105.21    | 110.96    | 52.78    | 48.89    | 42.46    |
| TC1200001247.mm.1 |                                 | 132.21    | 131.25    | 144.98    | 117.07   | 101.97   | 99.30    |
| TC1700001434.mm.1 |                                 | 159.39    | 171.72    | 151.49    | 99.70    | 79.39    | 117.60   |
| TC0200003614.mm.1 |                                 | 20.25     | 21.14     | 23.29     | 12.70    | 16.86    | 14.81    |
| TC0700002401.mm.1 | Mrip-ps                         | 8108.88   | 7373.37   | 7986.10   | 5923.66  | 4761.53  | 6059.37  |
| TC0300001437.mm.1 |                                 | 28.80     | 29.34     | 30.85     | 20.09    | 24.47    | 18.64    |
| TC1700000130.mm.1 |                                 | 42.22     | 54.24     | 45.77     | 28.20    | 26.57    | 34.96    |
| TC0600000464.mm.1 |                                 | 20.45     | 30.86     | 25.29     | 14.82    | 15.64    | 15.44    |
| TC0300000737.mm.1 | Gm17146; RP23-199B2.2           | 153.14    | 183.84    | 164.53    | 128.53   | 114.70   | 132.71   |
| TC0400001689.mm.1 |                                 | 492.78    | 580.04    | 514.48    | 281.72   | 361.53   | 383.62   |
| TC0200003476.mm.1 |                                 | 460.93    | 681.14    | 391.25    | 208.09   | 201.33   | 272.98   |
| TC1100001420.mm.1 |                                 | 85.76     | 97.72     | 68.91     | 56.44    | 50.40    | 45.00    |
| TC0200000255.mm.1 |                                 | 15.44     | 17.12     | 18.37     | 13.05    | 12.30    | 13.95    |
| TC0800002247.mm.1 |                                 | 75619.49  | 89663.33  | 73775.03  | 56093.80 | 38720.05 | 48979.85 |
| TC1200001710.mm.1 |                                 | 35.43     | 42.38     | 35.73     | 19.73    | 28.01    | 20.65    |
| TC1700002532.mm.1 |                                 | 49.47     | 68.76     | 53.75     | 35.89    | 36.10    | 39.24    |
| TC1300000577.mm.1 |                                 | 3157.32   | 3277.63   | 2858.51   | 2018.77  | 1660.38  | 2335.74  |
| TC1200000706.mm.1 |                                 | 18.99     | 18.91     | 16.14     | 14.79    | 13.43    | 13.62    |
| TC1100003244.mm.1 |                                 | 39.97     | 51.73     | 50.33     | 28.30    | 26.29    | 34.22    |
| TC1700002466.mm.1 | 2410021H03Rik                   | 35.68     | 34.55     | 31.18     | 24.42    | 28.11    | 27.07    |
| TC0X0000388.mm.1  | Gria3                           | 649.07    | 806.49    | 630.61    | 464.98   | 409.40   | 506.46   |
| TC1100003946.mm.1 | Rps12-ps26                      | 827.85    | 718.32    | 838.77    | 613.06   | 529.55   | 626.36   |
| TC1600001666.mm.1 |                                 | 30.28     | 27.24     | 30.25     | 24.20    | 20.97    | 23.98    |
| TC0500002761.mm.1 |                                 | 23.47     | 21.51     | 22.93     | 14.59    | 18.58    | 16.92    |
| TC0200001402.mm.1 |                                 | 40.54     | 36.60     | 43.41     | 24.52    | 23.10    | 31.23    |
| TC0500002726.mm.1 |                                 | 140.78    | 181.93    | 141.75    | 100.11   | 72.22    | 96.68    |
| TC0200002899.mm.1 |                                 | 73.04     | 72.16     | 84.24     | 40.47    | 49.88    | 56.66    |
| TC0200005256.mm.1 |                                 | 21.45     | 19.03     | 21.59     | 14.52    | 17.23    | 14.16    |
| TC0700001209.mm.1 |                                 | 62.06     | 63.42     | 59.77     | 49.43    | 47.07    | 38.49    |
| TC0300002646.mm.1 |                                 | 24.14     | 25.60     | 34.86     | 16.39    | 16.57    | 18.29    |
| TC1800001010.mm.1 | Gm24924                         | 121758.90 | 112293.20 | 123891.20 | 95868.23 | 70879.41 | 78914.02 |
| TC1100004153.mm.1 | Gm24060                         | 149.60    | 195.96    | 155.79    | 111.29   | 71.31    | 86.73    |
| TC0300000286.mm.1 |                                 | 34.21     | 44.28     | 32.89     | 21.12    | 24.94    | 24.92    |
| TC0100000840.mm.1 | Gm15369                         | 92.52     | 77.01     | 85.96     | 63.23    | 65.18    | 52.96    |
| TC0700001346.mm.1 |                                 | 126.61    | 166.68    | 117.37    | 88.72    | 86.82    | 75.59    |
| TC0600000364.mm.1 |                                 | 186.83    | 189.18    | 166.00    | 127.79   | 102.06   | 136.34   |
| TC0X00002945.mm.1 | Gm14969; RP23-318H22.2          | 503.78    | 520.01    | 424.00    | 289.27   | 210.95   | 321.00   |
| TC0300003043.mm.1 |                                 | 36.90     | 56.90     | 34.79     | 21.89    | 22.69    | 21.73    |
| TC0800001405.mm.1 | Mir7077                         | 17.82     | 16.52     | 16.90     | 14.70    | 12.81    | 11.97    |
| TC0X00003148.mm.1 |                                 | 21.83     | 21.27     | 23.61     | 15.76    | 18.87    | 15.46    |
| TC1000003182.mm.1 | Gm23252                         | 89.78     | 86.78     | 71.75     | 61.07    | 50.67    | 59.34    |
| TC0700004438.mm.1 |                                 | 117.80    | 134.06    | 144.85    | 56.22    | 55.64    | 90.28    |
| TC1300000994.mm.1 | Gm24935                         | 57.90     | 47.69     | 57.60     | 38.92    | 42.96    | 40.28    |
| TC1000002747.mm.1 |                                 | 406.27    | 500.78    | 424.63    | 300.65   | 249.93   | 328.09   |
| TC1000002922.mm.1 |                                 | 116.17    | 106.30    | 137.04    | 76.51    | 78.89    | 91.08    |
| TC0300001386.mm.1 |                                 | 97.68     | 104.08    | 83.02     | 73.58    | 63.86    | 60.68    |
| TC0900000902.mm.1 |                                 | 23.96     | 28.02     | 28.25     | 18.13    | 21.15    | 20.58    |
| TC1500001301.mm.1 |                                 | 62.18     | 63.05     | 54.29     | 47.30    | 35.71    | 37.05    |
| TC0600001864.mm.1 |                                 | 25.33     | 26.22     | 29.92     | 20.25    | 21.85    | 18.11    |
| TC0200001785.mm.1 |                                 | 69.08     | 76.00     | 67.09     | 60.77    | 53.66    | 52.37    |
| TC0500002553.mm.1 |                                 | 6776.17   | 7266.12   | 8230.11   | 5440.23  | 3966.04  | 3633.32  |
| TC0400003238.mm.1 |                                 | 71.13     | 90.09     | 77.44     | 59.21    | 60.67    | 59.35    |
| TC1800000958.mm.1 |                                 | 416.83    | 511.00    | 437.69    | 309.76   | 257.67   | 339.61   |
| TC1100003660.mm.1 | Gm22461                         | 4352.58   | 4143.25   | 5106.02   | 3216.66  | 2853.52  | 2241.18  |
| TC0600000336.mm.1 |                                 | 106.64    | 138.43    | 124.40    | 63.21    | 63.37    | 88.67    |

|                         |                        |           |           |           |          |          |          |
|-------------------------|------------------------|-----------|-----------|-----------|----------|----------|----------|
| TC0900001189.mm.1       |                        | 88.33     | 115.81    | 102.68    | 66.89    | 73.91    | 74.88    |
| TC0600003011.mm.1       |                        | 30.89     | 30.17     | 25.83     | 16.00    | 21.96    | 15.87    |
| TC0400002964.mm.1       |                        | 70.85     | 96.47     | 68.99     | 34.63    | 48.34    | 28.26    |
| TC1200002018.mm.1       |                        | 68.82     | 109.37    | 66.81     | 34.68    | 41.47    | 43.10    |
| TC0200001696.mm.1       | Gm13975                | 14.24     | 15.51     | 13.04     | 11.17    | 11.93    | 11.16    |
| TSUnmapped00000169.mm.1 | Rnu1a1                 | 118852.80 | 112854.10 | 125049.90 | 95360.95 | 70098.11 | 80741.01 |
| TC0300001174.mm.1       |                        | 50.59     | 102.09    | 56.56     | 29.05    | 22.97    | 27.44    |
| TC1100004012.mm.1       |                        | 442.91    | 363.41    | 355.82    | 275.24   | 276.29   | 301.34   |
| TC0900001762.mm.1       |                        | 5116.49   | 8048.81   | 6558.14   | 2289.17  | 3723.81  | 3080.98  |
| TC1900001376.mm.1       |                        | 27.53     | 37.34     | 28.14     | 16.71    | 20.65    | 20.06    |
| TC0500000143.mm.1       |                        | 42.05     | 51.11     | 43.50     | 31.49    | 22.51    | 30.29    |
| TC1600002100.mm.1       |                        | 70.98     | 101.32    | 86.03     | 56.01    | 45.67    | 55.33    |
| TC1400001263.mm.1       |                        | 29.24     | 46.12     | 40.18     | 16.89    | 23.46    | 17.76    |
| TC0600000259.mm.1       |                        | 112.97    | 122.27    | 109.38    | 66.98    | 67.29    | 91.34    |
| TC1000001280.mm.1       |                        | 10318.40  | 10927.48  | 11001.25  | 7609.57  | 4547.70  | 5878.73  |
| TC1800001032.mm.1       |                        | 48.93     | 53.97     | 55.78     | 22.68    | 34.18    | 34.20    |
| TC0X00001649.mm.1       | Gm8737                 | 207.57    | 199.60    | 247.35    | 122.61   | 157.90   | 106.23   |
| TC0200004287.mm.1       | Gm9864                 | 826.73    | 868.06    | 789.16    | 638.64   | 519.03   | 657.31   |
| TC1600000874.mm.1       |                        | 60.94     | 64.77     | 55.99     | 23.20    | 25.02    | 41.17    |
| TC0900000093.mm.1       |                        | 108.66    | 142.48    | 123.09    | 74.32    | 64.46    | 89.74    |
| TC0200003858.mm.1       | Gm13684; RP23-141N19.2 | 40.68     | 52.78     | 54.55     | 32.81    | 32.69    | 34.82    |
| TC0200004393.mm.1       | Gm25514                | 6364.04   | 4542.32   | 6454.56   | 3487.81  | 1976.31  | 2182.35  |
| TC0200003644.mm.1       |                        | 11.37     | 12.27     | 12.04     | 7.39     | 7.97     | 9.84     |
| TC1300002590.mm.1       |                        | 77.35     | 115.76    | 84.56     | 38.15    | 50.30    | 54.89    |
| TC1200000450.mm.1       | Gm22513                | 109307.80 | 102393.10 | 113042.90 | 86095.04 | 61606.02 | 64118.98 |
| TC0400000145.mm.1       | Gm11863; RP23-415F19.1 | 697.24    | 794.50    | 661.15    | 459.17   | 316.66   | 471.61   |
| TC1400001046.mm.1       |                        | 16.60     | 16.47     | 21.83     | 12.97    | 11.08    | 12.04    |
| TC0500003424.mm.1       |                        | 171.25    | 201.56    | 144.46    | 113.86   | 120.48   | 109.97   |
| TC1600000453.mm.1       |                        | 103.55    | 94.19     | 98.91     | 59.55    | 78.04    | 54.42    |
| TC0200001400.mm.1       | Gm13786                | 42.65     | 43.26     | 45.74     | 35.94    | 29.45    | 26.46    |
| TC1000002911.mm.1       |                        | 59.53     | 60.51     | 54.24     | 51.43    | 46.86    | 47.40    |
| TC0600000313.mm.1       |                        | 61.68     | 96.07     | 90.40     | 45.99    | 38.02    | 47.74    |
| TC0100000028.mm.1       |                        | 46.65     | 58.87     | 60.76     | 39.92    | 36.76    | 39.94    |
| TC1000000821.mm.1       | Mir6910                | 150.07    | 180.98    | 163.53    | 125.64   | 136.04   | 128.64   |
| TC0300002626.mm.1       |                        | 820.74    | 921.46    | 910.66    | 655.96   | 453.01   | 586.24   |
| TC0200004346.mm.1       |                        | 53.20     | 44.42     | 45.96     | 32.56    | 25.79    | 35.30    |
| TC1700002603.mm.1       |                        | 92.67     | 137.76    | 85.03     | 52.30    | 43.52    | 59.75    |
| TC0800002079.mm.1       |                        | 40.37     | 57.83     | 40.74     | 20.67    | 25.46    | 28.99    |
| TC0200005348.mm.1       | Gm16362                | 46.74     | 47.85     | 42.78     | 37.22    | 39.36    | 33.92    |
| TC0100001488.mm.1       | Gm20471; RP24-485J8.2  | 28.54     | 36.32     | 32.34     | 24.92    | 21.28    | 23.48    |
| TC0900000577.mm.1       |                        | 29.63     | 31.92     | 31.41     | 27.79    | 24.22    | 24.47    |
| TC1100003951.mm.1       |                        | 23.98     | 23.31     | 23.57     | 16.91    | 15.89    | 20.32    |
| TC1600000061.mm.1       |                        | 72.71     | 68.81     | 75.18     | 54.19    | 58.15    | 44.68    |
| TC0700001056.mm.1       | Kansl2-ps              | 895.76    | 946.09    | 777.33    | 584.84   | 466.23   | 642.63   |
| TC1100001745.mm.1       |                        | 120.15    | 116.82    | 101.56    | 81.42    | 92.03    | 75.26    |
| TC1000001199.mm.1       |                        | 147.54    | 183.20    | 160.48    | 126.78   | 121.86   | 129.38   |
| TC1200000701.mm.1       |                        | 24.98     | 29.40     | 31.24     | 21.04    | 22.20    | 19.14    |
| TC1800000905.mm.1       |                        | 2014.44   | 2222.79   | 1905.47   | 1575.91  | 1219.79  | 1509.35  |
| TC0200005260.mm.1       | Gm14263                | 10046.64  | 9601.51   | 11442.02  | 8532.01  | 7271.01  | 7155.90  |
| TC0900002413.mm.1       | Gm20199                | 121.80    | 120.92    | 105.16    | 88.62    | 60.61    | 66.00    |
| TC1400002269.mm.1       |                        | 77.97     | 69.06     | 66.16     | 51.31    | 38.90    | 51.50    |
| TC0X00001138.mm.1       |                        | 2746.35   | 2983.63   | 3333.39   | 2334.42  | 1702.73  | 1927.16  |
| TC0300002830.mm.1       |                        | 1171.35   | 1902.07   | 1250.50   | 571.20   | 667.59   | 822.44   |
| TC1900001040.mm.1       |                        | 52.38     | 58.61     | 51.28     | 30.59    | 41.69    | 37.80    |
| TC1700002389.mm.1       |                        | 32.13     | 32.78     | 33.24     | 26.69    | 20.02    | 19.20    |
| TC1400000026.mm.1       | Gm3030                 | 35.31     | 34.46     | 30.26     | 25.64    | 28.18    | 24.92    |
| TC0700001648.mm.1       |                        | 30.75     | 34.44     | 38.05     | 26.82    | 23.59    | 26.56    |
| TC0600001732.mm.1       |                        | 220.00    | 244.25    | 242.30    | 182.72   | 141.43   | 178.17   |
| TC1200002019.mm.1       |                        | 28.85     | 26.09     | 23.63     | 15.98    | 14.45    | 20.14    |
| TC0500003501.mm.1       |                        | 2116.82   | 2484.29   | 2421.93   | 1891.32  | 1463.15  | 1577.44  |
| TC0600002028.mm.1       |                        | 79.48     | 92.87     | 80.93     | 55.03    | 66.45    | 48.71    |
| TC1200000157.mm.1       |                        | 73.45     | 94.83     | 91.63     | 62.77    | 64.21    | 59.83    |
| TC0600002202.mm.1       |                        | 32.49     | 40.68     | 31.13     | 21.00    | 24.26    | 25.09    |
| TC0X00001812.mm.1       |                        | 217.44    | 259.99    | 221.11    | 138.18   | 77.06    | 125.88   |
| TC1600000748.mm.1       | Gm15693                | 66.35     | 63.12     | 54.03     | 49.28    | 44.67    | 42.88    |
| TC0900002614.mm.1       |                        | 70.54     | 72.28     | 57.81     | 40.49    | 36.39    | 50.12    |
| TC0700004130.mm.1       | Gm23700                | 1020.41   | 875.62    | 1061.30   | 743.59   | 805.16   | 742.28   |
| TC1200001169.mm.1       | Mir380                 | 19.28     | 23.18     | 28.28     | 12.18    | 12.99    | 15.94    |
| TC0900002732.mm.1       |                        | 50.54     | 41.84     | 32.84     | 24.41    | 26.47    | 22.99    |
| TC0300000936.mm.1       | Gm24830                | 40746.44  | 32689.51  | 36994.74  | 25787.86 | 16190.50 | 20565.66 |
| TC0300000942.mm.1       | Gm26232                | 40746.44  | 32689.51  | 36994.74  | 25787.86 | 16190.50 | 20565.66 |
| TC0300002517.mm.1       | Rnu1b6                 | 40746.44  | 32689.51  | 36994.74  | 25787.86 | 16190.50 | 20565.66 |
| TSUnmapped00000172.mm.1 | Rnu1b6                 | 40746.44  | 32689.51  | 36994.74  | 25787.86 | 16190.50 | 20565.66 |
| TC0800002072.mm.1       |                        | 27.19     | 30.03     | 29.42     | 19.85    | 24.26    | 18.83    |
| TC0600001623.mm.1       |                        | 33.38     | 36.12     | 34.15     | 23.59    | 29.67    | 24.55    |
| TC0200005153.mm.1       | Gm11460                | 759.65    | 764.40    | 779.08    | 436.20   | 578.17   | 583.30   |
| TC1300001308.mm.1       |                        | 70.05     | 45.14     | 61.42     | 25.01    | 27.41    | 36.71    |
| TC0900003209.mm.1       |                        | 99.62     | 170.09    | 132.67    | 55.56    | 70.58    | 39.65    |
| TC0200000837.mm.1       |                        | 22.08     | 23.29     | 29.02     | 17.70    | 18.15    | 16.64    |
| TC1900001164.mm.1       |                        | 56.74     | 62.46     | 50.02     | 44.48    | 43.50    | 42.26    |



|                   |                                  |           |           |           |           |           |           |
|-------------------|----------------------------------|-----------|-----------|-----------|-----------|-----------|-----------|
| TC140000143.mm.1  | Gm22350                          | 19.05     | 22.66     | 22.42     | 16.90     | 16.72     | 14.67     |
| TC0600003025.mm.1 |                                  | 25.62     | 27.14     | 31.34     | 20.42     | 21.40     | 22.68     |
| TC0100002145.mm.1 | Gm23792                          | 18.90     | 19.26     | 17.10     | 16.22     | 14.82     | 15.04     |
| TC0300001432.mm.1 |                                  | 13.60     | 14.47     | 14.89     | 11.39     | 12.85     | 11.44     |
| TC0X00001161.mm.1 | Gm16373                          | 929.19    | 829.91    | 1034.08   | 732.20    | 727.51    | 695.11    |
| TC0400004102.mm.1 | Gm13173; RP23-186F3.1            | 21.45     | 25.33     | 26.65     | 18.82     | 19.14     | 17.48     |
| TC0500003421.mm.1 |                                  | 107.67    | 130.31    | 116.06    | 94.89     | 80.46     | 90.00     |
| TC0600001692.mm.1 |                                  | 194.72    | 234.02    | 234.45    | 144.71    | 170.08    | 168.61    |
| TC0200003120.mm.1 |                                  | 62.56     | 84.64     | 88.74     | 52.77     | 39.26     | 44.70     |
| TC0100001867.mm.1 | Gm15867                          | 51.74     | 54.16     | 53.76     | 46.84     | 38.14     | 39.75     |
| TC1400001347.mm.1 |                                  | 20.66     | 21.05     | 23.97     | 15.31     | 17.48     | 13.28     |
| TC0400001549.mm.1 |                                  | 143.19    | 167.92    | 170.53    | 124.45    | 105.10    | 124.31    |
| TC1100003347.mm.1 |                                  | 18.82     | 21.84     | 15.83     | 11.20     | 11.13     | 13.66     |
| TC0200003037.mm.1 |                                  | 37.70     | 43.59     | 49.99     | 32.14     | 31.02     | 31.60     |
| TC1600000355.mm.1 |                                  | 81.27     | 104.23    | 77.29     | 63.55     | 51.59     | 50.82     |
| TC0200000732.mm.1 | Gm13462                          | 33.46     | 30.38     | 37.23     | 25.93     | 27.17     | 26.61     |
| TC0200000745.mm.1 |                                  | 33.37     | 35.74     | 40.38     | 20.33     | 27.82     | 19.26     |
| TC1200001154.mm.1 | Gm23347                          | 40.13     | 56.55     | 55.48     | 30.55     | 32.22     | 33.62     |
| TC0X00003119.mm.1 |                                  | 48713.72  | 58837.10  | 53707.97  | 37988.45  | 28596.29  | 38601.37  |
| TC1900000988.mm.1 |                                  | 16.64     | 20.07     | 22.21     | 12.58     | 14.05     | 14.21     |
| TC1800000715.mm.1 |                                  | 75.48     | 68.84     | 78.91     | 44.11     | 59.24     | 52.25     |
| TC0100001430.mm.1 |                                  | 24.18     | 26.05     | 26.30     | 19.31     | 20.83     | 22.53     |
| TC1600000866.mm.1 | Mir99ahg                         | 128.71    | 157.25    | 126.43    | 85.34     | 80.57     | 105.68    |
| TC0300000015.mm.1 | Gm17308                          | 41.35     | 30.83     | 37.52     | 26.91     | 23.00     | 24.85     |
| TC0600001581.mm.1 |                                  | 108.66    | 121.42    | 136.26    | 82.58     | 75.28     | 95.52     |
| TC0600001719.mm.1 | Gm15499; RP23-373I18.2           | 26.04     | 30.99     | 30.07     | 21.90     | 24.10     | 20.98     |
| TC0X00000773.mm.1 |                                  | 186.94    | 205.78    | 205.19    | 125.33    | 96.81     | 148.08    |
| TC1200001107.mm.1 |                                  | 131.03    | 106.51    | 106.50    | 72.61     | 69.97     | 89.22     |
| TC1300000065.mm.1 | Gm26861                          | 28.30     | 31.95     | 25.39     | 21.45     | 19.80     | 22.45     |
| TC0100000341.mm.1 |                                  | 29.28     | 36.59     | 33.56     | 20.26     | 13.35     | 21.02     |
| TC1700001325.mm.1 |                                  | 658.71    | 666.78    | 590.12    | 455.44    | 440.73    | 542.09    |
| TC0400000122.mm.1 | Gm11824                          | 140.36    | 118.91    | 109.74    | 95.78     | 87.88     | 89.17     |
| TC1200002259.mm.1 |                                  | 28.99     | 26.45     | 25.80     | 18.09     | 20.74     | 22.57     |
| TC1300001000.mm.1 |                                  | 24.65     | 32.65     | 23.88     | 18.13     | 14.16     | 17.50     |
| TC0900000890.mm.1 | Gm22962                          | 153.99    | 222.90    | 121.11    | 40.56     | 53.96     | 82.36     |
| TC0300002163.mm.1 |                                  | 8078.17   | 8582.43   | 7901.98   | 5728.32   | 4629.07   | 6463.39   |
| TC0200001687.mm.1 |                                  | 219.49    | 238.51    | 184.53    | 157.75    | 156.96    | 161.90    |
| TC0800002977.mm.1 | 4933408N05Rik                    | 87.14     | 78.97     | 74.37     | 62.08     | 58.71     | 67.97     |
| TC1300001915.mm.1 |                                  | 54.11     | 50.63     | 61.83     | 34.12     | 33.30     | 43.88     |
| TC0900002804.mm.1 |                                  | 73.72     | 96.33     | 82.01     | 54.04     | 64.29     | 57.39     |
| TC0800002444.mm.1 |                                  | 32.58     | 35.47     | 31.72     | 22.06     | 25.55     | 27.64     |
| TC0200000792.mm.1 | Gm13510                          | 46.84     | 63.50     | 59.78     | 39.92     | 32.67     | 37.99     |
| TC1600001474.mm.1 |                                  | 266.79    | 332.90    | 242.32    | 180.83    | 181.10    | 203.32    |
| TC0X00002499.mm.1 |                                  | 198.87    | 279.67    | 214.97    | 159.59    | 147.16    | 149.85    |
| TC0600002130.mm.1 |                                  | 59.51     | 77.73     | 66.09     | 38.11     | 42.70     | 50.69     |
| TC0600002826.mm.1 |                                  | 31.78     | 30.55     | 26.02     | 21.29     | 23.17     | 23.37     |
| TC0X00003224.mm.1 | Gm15146; RP23-228N14.2           | 106.56    | 132.23    | 99.50     | 71.27     | 66.00     | 83.61     |
| TC1300000738.mm.1 |                                  | 33.46     | 38.31     | 39.78     | 27.10     | 25.88     | 19.59     |
| TC0100000669.mm.1 |                                  | 635.80    | 678.84    | 647.53    | 505.17    | 408.70    | 528.98    |
| TC1100002713.mm.1 | Olfr1372-ps1                     | 49.32     | 49.03     | 42.37     | 39.31     | 34.66     | 33.10     |
| TC0900000552.mm.1 |                                  | 63.39     | 65.01     | 60.55     | 49.71     | 35.15     | 43.64     |
| TC0700003444.mm.1 |                                  | 107.77    | 191.24    | 127.91    | 70.76     | 64.63     | 76.11     |
| TC1100004154.mm.1 |                                  | 80.66     | 90.51     | 65.63     | 47.82     | 43.25     | 56.66     |
| TC1400001511.mm.1 |                                  | 61.65     | 75.62     | 57.12     | 34.22     | 46.18     | 41.79     |
| TC0700000454.mm.1 |                                  | 41.98     | 47.32     | 40.10     | 35.50     | 32.50     | 29.19     |
| TC1100004210.mm.1 | Gm11788; RP23-82I5.15            | 57.42     | 70.81     | 68.84     | 50.54     | 46.97     | 51.77     |
| TC1700002421.mm.1 |                                  | 199.52    | 194.31    | 221.78    | 138.59    | 164.24    | 119.41    |
| TC0200004347.mm.1 |                                  | 86.99     | 76.14     | 67.13     | 42.81     | 56.58     | 51.54     |
| TC1600000869.mm.1 |                                  | 35.92     | 64.13     | 41.62     | 22.51     | 23.48     | 24.37     |
| TC1900000933.mm.1 |                                  | 206.22    | 210.86    | 176.48    | 145.92    | 145.39    | 164.40    |
| TC1200000166.mm.1 |                                  | 65.65     | 75.55     | 62.45     | 43.43     | 42.01     | 27.30     |
| TC1200001323.mm.1 |                                  | 118.52    | 125.58    | 104.57    | 88.46     | 79.63     | 94.80     |
| TC0500002204.mm.1 |                                  | 16.32     | 13.11     | 12.96     | 9.83      | 9.03      | 10.88     |
| TC0300001433.mm.1 |                                  | 49.18     | 90.63     | 62.02     | 25.51     | 28.56     | 36.21     |
| TC0300001101.mm.1 |                                  | 27678.81  | 29167.56  | 28687.87  | 20759.53  | 11910.02  | 13031.95  |
| TC0200002160.mm.1 | Gm14093; 2.145048962-146444327.1 | 15.32     | 17.37     | 17.49     | 14.28     | 12.59     | 13.59     |
| TC1700000160.mm.1 |                                  | 27.37     | 32.40     | 30.12     | 23.71     | 20.85     | 24.50     |
| TC1900001242.mm.1 |                                  | 325.13    | 367.60    | 404.92    | 210.25    | 139.93    | 235.66    |
| TC0300000486.mm.1 |                                  | 2529.15   | 4493.87   | 3019.44   | 1161.72   | 1165.26   | 1853.36   |
| TC0300002788.mm.1 | Gm19420                          | 97.48     | 101.14    | 134.83    | 70.10     | 78.55     | 67.36     |
| TC1600000004.mm.1 |                                  | 18.07     | 19.87     | 20.08     | 16.04     | 13.74     | 12.14     |
| TC0600000610.mm.1 |                                  | 67.37     | 70.37     | 72.10     | 58.66     | 44.30     | 44.14     |
| TC0800002246.mm.1 |                                  | 164398.30 | 184854.00 | 185130.60 | 147146.00 | 114029.20 | 130136.10 |
| TC1800001003.mm.1 | Gm22251                          | 87.54     | 71.82     | 86.51     | 62.05     | 65.34     | 63.61     |
| TC0500002844.mm.1 |                                  | 1539.05   | 1668.22   | 1437.92   | 1015.83   | 543.31    | 800.13    |
| TC0400002261.mm.1 | Gm11851; RP23-323E6.1            | 576.51    | 508.16    | 471.40    | 353.33    | 244.83    | 349.67    |
| TC0800002069.mm.1 |                                  | 24.57     | 28.98     | 22.21     | 14.81     | 17.09     | 18.95     |
| TC0900000894.mm.1 |                                  | 29.70     | 32.59     | 31.85     | 25.37     | 19.06     | 17.72     |
| TC0600000382.mm.1 |                                  | 988.92    | 1232.38   | 1229.35   | 738.20    | 543.75    | 793.19    |

|                   |                        |           |           |           |          |          |          |
|-------------------|------------------------|-----------|-----------|-----------|----------|----------|----------|
| TC010000306.mm.1  |                        | 15.28     | 14.77     | 15.52     | 10.24    | 13.04    | 11.69    |
| TC1200002210.mm.1 |                        | 99.99     | 96.56     | 103.44    | 80.06    | 55.79    | 67.27    |
| TC1300001663.mm.1 |                        | 50.35     | 50.96     | 66.56     | 41.39    | 35.06    | 36.04    |
| TC040000359.mm.1  |                        | 170.97    | 163.40    | 137.23    | 98.28    | 116.75   | 119.43   |
| TC0600003032.mm.1 |                        | 138.48    | 154.82    | 151.82    | 114.17   | 76.73    | 95.70    |
| TC0400000597.mm.1 | Tpt1-ps2               | 41.11     | 36.58     | 38.11     | 32.84    | 26.19    | 26.31    |
| TC0100001287.mm.1 |                        | 109.46    | 140.05    | 132.59    | 96.54    | 73.62    | 70.16    |
| TC1500001492.mm.1 |                        | 256.54    | 418.15    | 233.18    | 109.32   | 116.07   | 163.66   |
| TC0600002061.mm.1 |                        | 162.57    | 266.86    | 184.16    | 85.65    | 118.28   | 107.14   |
| TC1800001372.mm.1 |                        | 57.07     | 65.70     | 75.34     | 30.69    | 44.86    | 41.69    |
| TC0200003100.mm.1 |                        | 369.59    | 409.64    | 367.24    | 311.71   | 233.76   | 226.26   |
| TC1800001645.mm.1 |                        | 38.53     | 32.44     | 35.78     | 28.04    | 23.66    | 20.21    |
| TC0600001779.mm.1 | Gm23551                | 17716.30  | 19552.21  | 21896.52  | 13913.53 | 8760.33  | 11704.51 |
| TC0200001723.mm.1 | Gm25189                | 62188.91  | 55610.11  | 68798.59  | 48117.23 | 34187.86 | 38358.88 |
| TC1600001830.mm.1 |                        | 42.70     | 29.51     | 31.25     | 23.36    | 17.48    | 19.27    |
| TC1700000466.mm.1 | Rps2-ps9               | 440.19    | 393.97    | 477.74    | 354.61   | 278.72   | 279.13   |
| TC0100003628.mm.1 |                        | 23.58     | 29.40     | 27.81     | 20.13    | 17.89    | 21.13    |
| TC0X00002410.mm.1 | Gm14734; RP23-272G10.3 | 198.68    | 207.60    | 195.55    | 144.71   | 95.27    | 134.82   |
| TC0400002740.mm.1 |                        | 17.90     | 20.41     | 26.55     | 13.68    | 14.14    | 11.79    |
| TC1900000384.mm.1 |                        | 493.26    | 538.15    | 355.34    | 301.78   | 248.20   | 263.83   |
| TC1100001337.mm.1 | Rnu1a1                 | 117525.90 | 117132.80 | 118980.90 | 95835.28 | 67842.24 | 81857.31 |
| TC1100001338.mm.1 | Gm22068                | 117525.90 | 117132.80 | 118980.90 | 95835.28 | 67842.24 | 81857.31 |
| TC1200000451.mm.1 | Gm22634                | 117525.90 | 117132.80 | 118980.90 | 95835.28 | 67842.24 | 81857.31 |
| TC1200000452.mm.1 | Gm23804                | 117525.90 | 117132.80 | 118980.90 | 95835.28 | 67842.24 | 81857.31 |
| TC1200000453.mm.1 | Gm26444                | 117525.90 | 117132.80 | 118980.90 | 95835.28 | 67842.24 | 81857.31 |
| TC1200001751.mm.1 | Gm25679                | 117525.90 | 117132.80 | 118980.90 | 95835.28 | 67842.24 | 81857.31 |
| TC1200001754.mm.1 | Gm22317                | 117525.90 | 117132.80 | 118980.90 | 95835.28 | 67842.24 | 81857.31 |
| TC1000002009.mm.1 |                        | 4455.25   | 4721.09   | 4329.59   | 2996.41  | 1917.92  | 2964.93  |
| TC0600003004.mm.1 |                        | 147.16    | 161.13    | 125.92    | 89.80    | 92.30    | 113.39   |
| TC0900001007.mm.1 |                        | 48.49     | 55.68     | 48.58     | 27.33    | 33.85    | 39.23    |
| TC1500001290.mm.1 |                        | 44.65     | 43.53     | 31.69     | 19.43    | 27.26    | 18.66    |
| TC0800002198.mm.1 |                        | 21.20     | 18.65     | 22.33     | 17.17    | 14.97    | 16.25    |
| TC0500000330.mm.1 | Gm24436                | 29.86     | 30.48     | 28.54     | 25.88    | 21.96    | 20.54    |
| TC1300001754.mm.1 |                        | 28.80     | 21.81     | 23.37     | 17.94    | 18.07    | 17.71    |
| TC0200002388.mm.1 |                        | 103.25    | 96.81     | 105.09    | 88.56    | 72.51    | 71.24    |
| TC0100000339.mm.1 |                        | 25.72     | 25.81     | 21.60     | 16.10    | 19.88    | 17.00    |
| TC1500000101.mm.1 |                        | 128.92    | 146.52    | 136.17    | 97.34    | 97.76    | 118.17   |
| TC1200000332.mm.1 |                        | 17.99     | 19.12     | 14.85     | 12.09    | 12.23    | 13.51    |
| TC0900001095.mm.1 | Rps27a-ps2             | 2844.14   | 2889.48   | 3728.38   | 2244.94  | 2017.00  | 2299.88  |
| TC0X00001212.mm.1 |                        | 56.03     | 53.95     | 72.01     | 42.25    | 41.20    | 44.25    |
| TC1400001265.mm.1 |                        | 14.86     | 18.80     | 17.08     | 11.87    | 12.80    | 13.37    |
| TC1700001168.mm.1 | Gm6276                 | 108.40    | 87.40     | 102.05    | 80.22    | 67.68    | 72.05    |
| TC0100002662.mm.1 |                        | 91.00     | 128.34    | 113.46    | 71.40    | 49.15    | 67.71    |
| TC1400002402.mm.1 |                        | 559.34    | 611.56    | 505.35    | 402.39   | 277.84   | 376.74   |
| TC0500002105.mm.1 |                        | 144.15    | 160.29    | 119.98    | 106.58   | 98.66    | 92.48    |
| TC1400000379.mm.1 |                        | 405.59    | 490.14    | 453.69    | 332.37   | 273.58   | 350.65   |
| TC0700003445.mm.1 |                        | 338.13    | 512.13    | 338.34    | 151.52   | 161.08   | 245.10   |
| TC0800001986.mm.1 |                        | 37.70     | 36.70     | 25.55     | 16.41    | 20.18    | 20.90    |
| TC0X00003068.mm.1 |                        | 418.04    | 567.85    | 447.13    | 297.10   | 242.52   | 335.76   |
| TC0300000947.mm.1 | Gm22614                | 38136.01  | 32218.28  | 36324.18  | 27195.64 | 18021.70 | 21616.78 |
| TC0300002518.mm.1 | Gm25890                | 38136.01  | 32218.28  | 36324.18  | 27195.64 | 18021.70 | 21616.78 |
| TC1100001751.mm.1 |                        | 49.86     | 52.55     | 49.62     | 36.53    | 44.91    | 37.88    |
| TC0200000637.mm.1 |                        | 61.89     | 81.45     | 58.44     | 41.58    | 40.12    | 48.19    |
| TC1100004257.mm.1 | Gm12590; RP23-342H16.5 | 470.20    | 491.80    | 502.33    | 301.05   | 226.73   | 363.83   |
| TC0900002596.mm.1 |                        | 108.10    | 124.16    | 98.90     | 78.10    | 83.50    | 88.32    |
| TC0100002298.mm.1 | Gm23240                | 61.47     | 61.03     | 57.46     | 49.17    | 43.24    | 52.24    |
| TC0500002516.mm.1 |                        | 80.86     | 92.99     | 99.27     | 73.85    | 59.24    | 63.87    |
| TC0200004094.mm.1 |                        | 63.80     | 87.21     | 73.45     | 47.91    | 52.79    | 54.40    |
| TC0100001700.mm.1 |                        | 36.12     | 42.46     | 46.58     | 30.62    | 29.62    | 32.62    |
| TC0200003475.mm.1 |                        | 89.81     | 112.45    | 91.41     | 51.12    | 60.67    | 73.28    |
| TC0800001351.mm.1 |                        | 44.17     | 55.38     | 48.63     | 39.23    | 37.00    | 33.24    |
| TC1600002099.mm.1 |                        | 168.66    | 208.43    | 194.13    | 151.07   | 113.86   | 113.94   |
| TC1900000326.mm.1 | Gm23238                | 58310.60  | 58252.50  | 55270.42  | 46519.52 | 31653.74 | 35871.50 |
| TC0900002500.mm.1 |                        | 42.57     | 52.80     | 47.47     | 35.77    | 36.09    | 29.00    |
| TC1100003843.mm.1 |                        | 29.38     | 31.64     | 32.01     | 23.06    | 27.30    | 25.47    |
| TC0800001824.mm.1 |                        | 116.62    | 139.93    | 96.07     | 71.97    | 74.05    | 82.06    |
| TC0800001846.mm.1 |                        | 15621.73  | 16591.04  | 17291.46  | 13173.25 | 9803.67  | 12296.54 |
| TC1200000597.mm.1 |                        | 20.67     | 17.70     | 19.23     | 13.19    | 13.57    | 16.29    |
| TC1200000666.mm.1 |                        | 23.81     | 25.62     | 24.26     | 18.83    | 15.96    | 20.68    |
| TC1100003670.mm.1 |                        | 18.92     | 20.68     | 16.67     | 14.29    | 15.19    | 13.15    |
| TC0800001272.mm.1 |                        | 1182.41   | 1193.00   | 929.71    | 599.82   | 579.01   | 823.93   |
| TC0900001274.mm.1 |                        | 35.12     | 36.60     | 37.50     | 19.09    | 22.98    | 28.92    |
| TC1100001870.mm.1 |                        | 14.14     | 10.80     | 12.81     | 8.51     | 9.55     | 9.35     |
| TC0700004580.mm.1 | Kcnq1ot1               | 40.00     | 43.49     | 38.88     | 29.57    | 31.26    | 35.72    |
| TC0X00000475.mm.1 | Gm14584                | 1402.97   | 1277.98   | 1154.30   | 896.07   | 808.14   | 1039.39  |
| TC0200002984.mm.1 |                        | 80.08     | 69.11     | 58.43     | 34.56    | 41.37    | 49.58    |
| TC0400000691.mm.1 | Gm12910; RP23-64F17.5  | 21.82     | 22.61     | 20.61     | 17.19    | 18.62    | 15.01    |
| TC0X00001888.mm.1 | Drr1                   | 57032.05  | 65387.23  | 58969.68  | 39717.91 | 44017.39 | 50853.75 |
| TC1900000302.mm.1 |                        | 39.20     | 34.46     | 34.70     | 14.61    | 20.76    | 25.24    |
| TC1200001170.mm.1 | Mir1197                | 28.79     | 25.79     | 24.06     | 21.65    | 17.19    | 18.98    |

|                   |                        |          |          |          |          |         |         |
|-------------------|------------------------|----------|----------|----------|----------|---------|---------|
| TC1600001828.mm.1 |                        | 26.15    | 23.97    | 18.43    | 14.67    | 14.39   | 16.19   |
| TC0600000335.mm.1 |                        | 37.66    | 45.41    | 49.24    | 33.04    | 30.90   | 33.32   |
| TC1100003939.mm.1 |                        | 62.92    | 72.95    | 68.01    | 46.53    | 56.98   | 52.98   |
| TC0600000314.mm.1 |                        | 62.96    | 105.07   | 57.43    | 35.31    | 37.03   | 36.98   |
| TC0300001388.mm.1 |                        | 46.05    | 64.02    | 49.08    | 34.03    | 18.02   | 23.79   |
| TC0800002776.mm.1 |                        | 1252.10  | 1411.21  | 1512.83  | 926.39   | 954.12  | 633.24  |
| TC1300001738.mm.1 |                        | 23.12    | 28.13    | 21.48    | 17.47    | 17.93   | 18.28   |
| TC1600000341.mm.1 |                        | 36.27    | 44.26    | 38.74    | 30.03    | 32.59   | 27.41   |
| TC0900002097.mm.1 |                        | 59.61    | 63.60    | 56.34    | 36.05    | 38.86   | 49.65   |
| TC0800000913.mm.1 |                        | 29.93    | 40.54    | 35.99    | 26.52    | 24.83   | 24.19   |
| TC1200001707.mm.1 |                        | 33.28    | 40.27    | 47.29    | 22.94    | 24.26   | 29.18   |
| TC0400003486.mm.1 |                        | 132.87   | 143.40   | 150.10   | 75.11    | 96.27   | 110.09  |
| TC1600000877.mm.1 | Mir99a                 | 24.19    | 28.98    | 21.95    | 10.83    | 13.59   | 17.68   |
| TC0X00002200.mm.1 |                        | 20.23    | 25.36    | 22.04    | 13.45    | 14.09   | 17.92   |
| TC0600000116.mm.1 |                        | 64.10    | 97.64    | 84.81    | 41.77    | 43.18   | 55.63   |
| TC0600000139.mm.1 | ST7-OT4_4              | 95.57    | 101.56   | 88.26    | 73.64    | 65.82   | 51.42   |
| TC1300000406.mm.1 | Gm22126                | 3690.14  | 3142.68  | 3576.98  | 2565.62  | 1506.44 | 1606.45 |
| TC0100003332.mm.1 |                        | 179.68   | 240.18   | 205.14   | 113.09   | 131.38  | 73.64   |
| TC0500001870.mm.1 | Gm24630                | 163.03   | 238.07   | 179.65   | 118.30   | 131.11  | 125.79  |
| TC1300000653.mm.1 |                        | 115.79   | 136.44   | 106.75   | 72.54    | 68.44   | 93.28   |
| TC1800000283.mm.1 |                        | 48.99    | 46.62    | 39.78    | 37.04    | 33.76   | 32.09   |
| TC0300000575.mm.1 | Mir15b                 | 35.36    | 53.52    | 41.05    | 25.98    | 25.44   | 29.22   |
| TC1000002309.mm.1 |                        | 30.18    | 39.29    | 30.13    | 21.85    | 21.62   | 25.24   |
| TC0400001174.mm.1 |                        | 57.45    | 74.47    | 73.16    | 39.46    | 52.09   | 39.49   |
| TC1600000727.mm.1 |                        | 445.43   | 643.96   | 465.55   | 326.57   | 310.87  | 352.42  |
| TC1000000516.mm.1 |                        | 103.78   | 113.15   | 78.60    | 65.07    | 61.15   | 67.71   |
| TC0700001386.mm.1 |                        | 26.71    | 20.74    | 23.50    | 18.27    | 17.40   | 18.27   |
| TC0900001993.mm.1 |                        | 234.90   | 294.46   | 258.43   | 187.68   | 128.68  | 175.44  |
| TC0200005361.mm.1 |                        | 1031.39  | 1504.16  | 1203.31  | 673.03   | 469.38  | 783.59  |
| TC0800002536.mm.1 | Gm4899                 | 518.94   | 552.37   | 482.26   | 396.38   | 264.40  | 343.25  |
| TC0600002011.mm.1 |                        | 144.15   | 178.60   | 121.58   | 91.84    | 89.14   | 103.96  |
| TC0200004723.mm.1 | Gm14071                | 17.72    | 18.43    | 15.44    | 12.97    | 14.18   | 11.53   |
| TC0X00003169.mm.1 | Gm24907                | 25.73    | 25.39    | 22.13    | 15.67    | 20.38   | 16.50   |
| TC1600002046.mm.1 |                        | 40.27    | 42.21    | 36.82    | 34.00    | 27.62   | 30.64   |
| TC1000000667.mm.1 |                        | 15.00    | 16.46    | 14.75    | 10.75    | 13.18   | 10.14   |
| TC1200000691.mm.1 |                        | 25.98    | 25.09    | 20.93    | 16.73    | 18.11   | 19.30   |
| TC1200001317.mm.1 |                        | 186.86   | 207.37   | 171.49   | 126.77   | 73.59   | 111.29  |
| TC1500000428.mm.1 | Gm5045                 | 432.08   | 420.33   | 465.54   | 386.34   | 313.39  | 326.72  |
| TC1900001041.mm.1 |                        | 25.67    | 31.06    | 29.30    | 23.72    | 20.49   | 22.52   |
| TC1800000402.mm.1 |                        | 30.49    | 29.10    | 31.23    | 26.48    | 20.77   | 21.02   |
| TC1200002168.mm.1 | LOC100862089           | 33.71    | 37.88    | 26.84    | 23.96    | 21.00   | 20.54   |
| TC1300002636.mm.1 |                        | 503.60   | 674.26   | 487.05   | 316.52   | 285.59  | 398.18  |
| TC1300001221.mm.1 |                        | 59.27    | 48.92    | 43.55    | 35.52    | 34.27   | 37.82   |
| TC0500000506.mm.1 | 5730480H06Rik; Pacrgl  | 26.07    | 34.54    | 27.31    | 18.65    | 21.72   | 21.09   |
| TC0X00002690.mm.1 |                        | 41.26    | 60.78    | 53.14    | 29.43    | 34.17   | 34.77   |
| TC0400000471.mm.1 |                        | 220.39   | 303.51   | 244.80   | 135.74   | 139.56  | 189.29  |
| TC0X00000738.mm.1 | Fam220-ps              | 30.20    | 26.24    | 30.66    | 24.00    | 22.29   | 24.56   |
| TC0900000249.mm.1 |                        | 16.12    | 19.21    | 18.77    | 12.96    | 14.74   | 14.60   |
| TC1500001633.mm.1 |                        | 32.57    | 27.33    | 29.23    | 22.77    | 23.09   | 25.50   |
| TC0300003055.mm.1 |                        | 26.92    | 32.78    | 27.99    | 23.88    | 20.99   | 18.97   |
| TC1700001430.mm.1 |                        | 130.68   | 152.84   | 113.02   | 89.60    | 75.17   | 97.63   |
| TC1400002270.mm.1 |                        | 139.13   | 177.92   | 104.16   | 74.05    | 56.57   | 81.90   |
| TC0300001968.mm.1 |                        | 32.06    | 31.33    | 24.94    | 18.80    | 22.83   | 20.70   |
| TC1600000801.mm.1 | Gm22448                | 64.24    | 56.14    | 75.63    | 43.49    | 40.84   | 50.21   |
| TC0900003212.mm.1 |                        | 50.18    | 61.56    | 69.29    | 38.90    | 45.11   | 40.58   |
| TC0500000561.mm.1 |                        | 31.50    | 32.49    | 26.20    | 20.86    | 24.61   | 20.78   |
| TC0200001414.mm.1 | Gm13814; RP23-165L23.2 | 25.90    | 22.50    | 23.80    | 21.16    | 18.16   | 18.48   |
| TC1300001998.mm.1 |                        | 3138.75  | 3129.90  | 2918.91  | 2591.39  | 1975.64 | 1866.10 |
| TC0900000041.mm.1 |                        | 155.13   | 166.57   | 141.10   | 94.11    | 125.92  | 89.37   |
| TC0X00000769.mm.1 | Gm5937                 | 6747.55  | 6730.90  | 6361.44  | 6004.51  | 5065.66 | 5092.48 |
| TC1000001871.mm.1 |                        | 40.52    | 45.76    | 48.88    | 30.94    | 37.91   | 31.66   |
| TC0700001383.mm.1 | Map6                   | 29.88    | 36.67    | 41.36    | 18.83    | 23.96   | 25.23   |
| TC1600002127.mm.1 |                        | 96.46    | 68.84    | 70.30    | 53.09    | 41.48   | 51.54   |
| TC1700002401.mm.1 |                        | 27.55    | 33.70    | 26.52    | 20.68    | 18.09   | 22.83   |
| TC0100001235.mm.1 |                        | 51.73    | 54.25    | 63.67    | 46.93    | 40.30   | 40.99   |
| TC0400002124.mm.1 | Gm11805                | 85.43    | 87.93    | 106.28   | 56.61    | 72.12   | 68.05   |
| TC0200000275.mm.1 |                        | 109.74   | 108.95   | 116.69   | 68.03    | 77.18   | 94.50   |
| TC1700001809.mm.1 | Gm10503                | 24.69    | 17.85    | 20.01    | 15.34    | 12.30   | 13.98   |
| TC0500001154.mm.1 |                        | 91.50    | 111.61   | 79.85    | 50.79    | 49.75   | 69.58   |
| TC0100000841.mm.1 | Gm15374                | 70.47    | 76.47    | 72.12    | 47.94    | 50.28   | 63.24   |
| TC1000002854.mm.1 |                        | 21.63    | 21.72    | 17.64    | 15.69    | 14.70   | 16.31   |
| TC1600001120.mm.1 |                        | 164.30   | 194.03   | 143.04   | 97.85    | 74.13   | 117.17  |
| TC0100003704.mm.1 |                        | 38.26    | 47.43    | 42.67    | 34.89    | 28.27   | 26.65   |
| TC1600000354.mm.1 |                        | 81.06    | 87.42    | 75.25    | 39.65    | 53.48   | 61.02   |
| TC1300000435.mm.1 |                        | 93.76    | 78.11    | 78.64    | 69.16    | 56.82   | 61.49   |
| TC0X00003305.mm.1 |                        | 108.01   | 86.15    | 104.55   | 70.31    | 46.48   | 64.86   |
| TC1900001581.mm.1 | Gm6807                 | 12931.49 | 13162.47 | 11464.84 | 10097.67 | 7654.75 | 9419.52 |
| TC0500001156.mm.1 |                        | 23.03    | 22.25    | 21.63    | 14.55    | 16.61   | 19.24   |
| TC1400001264.mm.1 |                        | 11.91    | 14.76    | 13.23    | 9.95     | 11.07   | 10.09   |
| TC0X00003225.mm.1 | Gm15145; RP23-228N14.5 | 870.79   | 798.08   | 749.69   | 543.33   | 479.02  | 665.08  |

|                   |                       |          |          |          |          |          |          |
|-------------------|-----------------------|----------|----------|----------|----------|----------|----------|
| TC0500001810.mm.1 |                       | 692.67   | 1170.03  | 855.26   | 367.18   | 531.34   | 489.17   |
| TC1300001174.mm.1 |                       | 48.11    | 78.59    | 56.04    | 31.55    | 33.40    | 38.68    |
| TC0600002053.mm.1 | Gm13862               | 10312.91 | 9348.32  | 10680.60 | 8919.53  | 7627.56  | 7703.49  |
| TC1600001953.mm.1 |                       | 44786.76 | 51938.90 | 45069.85 | 33035.25 | 21562.20 | 32009.18 |
| TC1000001723.mm.1 |                       | 30.32    | 26.46    | 28.93    | 25.19    | 21.90    | 21.48    |
| TC1500001974.mm.1 |                       | 111.44   | 124.00   | 107.76   | 97.59    | 87.47    | 78.21    |
| TC1100000524.mm.1 | Gm23813               | 5947.91  | 7017.51  | 6461.95  | 5493.84  | 4401.86  | 4329.44  |
| TC1600000419.mm.1 |                       | 34.44    | 40.78    | 39.91    | 30.86    | 32.01    | 32.08    |
| TC0X00000991.mm.1 | Gm16471               | 162.37   | 177.62   | 178.72   | 156.42   | 136.66   | 141.09   |
| TC1000003033.mm.1 | Gm15961; RP23-455J6.4 | 133.16   | 201.78   | 143.62   | 89.03    | 96.16    | 106.57   |
| TC0700003812.mm.1 |                       | 29.56    | 28.74    | 27.81    | 19.53    | 25.24    | 21.47    |
| TC0700003052.mm.1 |                       | 40.66    | 38.69    | 42.53    | 35.93    | 31.27    | 28.89    |
| TC0600002488.mm.1 |                       | 56.65    | 51.83    | 58.16    | 43.79    | 37.18    | 46.89    |
| TC0X00002311.mm.1 | Mir505                | 207.60   | 371.17   | 319.33   | 128.23   | 140.18   | 175.00   |
| TC0400003153.mm.1 | Gm12785               | 61.22    | 78.99    | 63.45    | 47.14    | 45.68    | 53.67    |
| TC0100001977.mm.1 |                       | 90.28    | 114.44   | 91.40    | 65.81    | 70.65    | 78.12    |
| TC0900000094.mm.1 |                       | 28.71    | 33.07    | 35.74    | 22.47    | 23.80    | 26.83    |
| TC1600000728.mm.1 |                       | 75.21    | 76.47    | 54.81    | 42.40    | 37.71    | 49.26    |
| TC0700003530.mm.1 | AU020206              | 929.65   | 1061.64  | 792.19   | 558.25   | 526.07   | 714.52   |
| TC1500001636.mm.1 |                       | 162.70   | 212.26   | 161.18   | 132.90   | 123.84   | 129.04   |
| TC1800000536.mm.1 |                       | 38.27    | 36.04    | 32.59    | 28.75    | 19.96    | 23.57    |
| TC0900001263.mm.1 |                       | 60.01    | 57.75    | 77.37    | 37.46    | 33.72    | 48.52    |
| TC1300000077.mm.1 |                       | 39.04    | 30.92    | 28.57    | 20.31    | 24.94    | 19.84    |
| TC0200003041.mm.1 |                       | 94.26    | 126.74   | 86.11    | 55.03    | 49.62    | 71.57    |
| TC0100002896.mm.1 |                       | 22.69    | 30.30    | 24.31    | 15.69    | 19.32    | 18.17    |
| TC1600000743.mm.1 |                       | 168.40   | 148.12   | 208.31   | 114.76   | 122.12   | 126.55   |
| TC1600001227.mm.1 |                       | 19.34    | 23.70    | 20.65    | 17.84    | 16.12    | 15.80    |
| TC1200000463.mm.1 |                       | 41.96    | 52.51    | 41.81    | 29.88    | 21.30    | 31.85    |
| TC0X00000419.mm.1 | Gm14654               | 798.11   | 796.04   | 765.76   | 556.80   | 394.61   | 592.36   |
| TC0200003399.mm.1 | Snord90               | 175.25   | 191.96   | 144.90   | 120.74   | 89.85    | 119.63   |
| TC0200002726.mm.1 | Gm16358               | 49.06    | 48.18    | 41.28    | 36.82    | 39.22    | 35.43    |
| TC1700000560.mm.1 | A530088E08Rik         | 130.85   | 97.75    | 137.63   | 86.84    | 71.08    | 80.82    |
| TC1300002265.mm.1 | A130040M12Rik         | 758.45   | 867.89   | 859.68   | 691.26   | 548.22   | 643.91   |
| TC0200005329.mm.1 | Gm14392               | 200.14   | 204.34   | 218.36   | 153.51   | 107.11   | 153.00   |
| TC1100000212.mm.1 |                       | 96.96    | 96.93    | 78.96    | 68.47    | 70.82    | 73.26    |
| TC1100002338.mm.1 |                       | 46.24    | 50.94    | 39.96    | 37.16    | 32.87    | 33.68    |
| TC0200004274.mm.1 |                       | 29.99    | 24.12    | 27.13    | 18.26    | 17.35    | 22.27    |
| TC1200000952.mm.1 |                       | 15.44    | 19.80    | 20.74    | 13.76    | 11.42    | 9.60     |
| TC0100003390.mm.1 |                       | 65.31    | 68.36    | 76.45    | 48.65    | 30.20    | 45.80    |
| TC0100002380.mm.1 |                       | 39.07    | 46.97    | 39.11    | 34.95    | 29.80    | 30.46    |
| TC0X00000123.mm.1 |                       | 98.27    | 131.07   | 80.43    | 67.25    | 50.98    | 55.84    |
| TC0200003124.mm.1 | Gm13369               | 165.72   | 184.85   | 133.58   | 109.93   | 87.50    | 114.59   |
| TC1800000633.mm.1 |                       | 120.28   | 170.29   | 142.71   | 81.42    | 78.46    | 107.19   |
| TC1700001161.mm.1 |                       | 62.45    | 60.73    | 51.60    | 43.72    | 32.10    | 42.48    |
| TC1100001181.mm.1 |                       | 21.25    | 19.42    | 21.42    | 18.69    | 16.35    | 16.10    |
| TC0300000019.mm.1 |                       | 46.56    | 73.15    | 48.05    | 31.79    | 27.27    | 35.09    |
| TC0400000640.mm.1 |                       | 58.88    | 66.83    | 59.41    | 50.32    | 35.55    | 42.75    |
| TC0400002451.mm.1 | Gm24112               | 2689.67  | 3804.60  | 2447.11  | 1170.55  | 1125.85  | 1943.15  |
| TC1700002392.mm.1 | Gm17228               | 95.91    | 82.02    | 81.80    | 65.54    | 42.24    | 55.73    |
| TC0400003455.mm.1 | Gm12881               | 149.14   | 97.15    | 113.57   | 77.61    | 62.73    | 77.17    |
| TC0900000962.mm.1 |                       | 105.71   | 137.67   | 140.78   | 92.09    | 62.71    | 79.80    |
| TC0200004527.mm.1 |                       | 84.99    | 131.46   | 95.09    | 55.25    | 66.88    | 65.37    |
| TC0800000657.mm.1 |                       | 561.70   | 659.76   | 514.41   | 419.26   | 289.98   | 392.04   |
| TC0X00000109.mm.1 |                       | 53.64    | 57.14    | 46.66    | 34.91    | 43.67    | 34.36    |
| TC1300000055.mm.1 |                       | 43.47    | 37.90    | 31.91    | 28.33    | 27.47    | 26.22    |
| TC0X00000301.mm.1 |                       | 37.53    | 51.66    | 40.75    | 25.25    | 23.47    | 32.52    |
| TC0200003341.mm.1 |                       | 53.71    | 61.00    | 66.63    | 47.35    | 43.23    | 49.64    |
| TC0500000388.mm.1 | Mir3097               | 266.06   | 346.26   | 344.18   | 209.48   | 233.67   | 240.92   |
| TC1800001641.mm.1 |                       | 57.96    | 89.55    | 73.19    | 38.94    | 41.58    | 50.91    |
| TC1700002326.mm.1 |                       | 178.47   | 160.06   | 168.35   | 116.58   | 84.60    | 128.62   |
| TC1800000252.mm.1 | Gm16345               | 519.72   | 413.32   | 471.09   | 369.93   | 296.77   | 352.18   |
| TC0900002597.mm.1 | Gm23730               | 645.93   | 558.94   | 605.95   | 441.18   | 370.95   | 500.12   |
| TC0600003320.mm.1 | LOC100861780          | 677.68   | 674.29   | 611.36   | 484.18   | 254.79   | 324.25   |
| TC0400001046.mm.1 |                       | 465.45   | 552.80   | 463.81   | 358.43   | 293.73   | 393.14   |
| TC0400002368.mm.1 |                       | 465.45   | 552.80   | 463.81   | 358.43   | 293.73   | 393.14   |
| TC1800000079.mm.1 |                       | 28.56    | 25.63    | 20.18    | 15.64    | 17.54    | 17.60    |
| TC0400004038.mm.1 |                       | 130.09   | 105.28   | 83.14    | 67.52    | 61.11    | 69.57    |
| TC0300002004.mm.1 |                       | 21.64    | 21.70    | 23.01    | 20.06    | 16.69    | 16.63    |
| TC0700001414.mm.1 |                       | 61.08    | 72.50    | 74.34    | 57.63    | 49.36    | 53.17    |
| TC1600000441.mm.1 | Gm20056               | 849.46   | 886.21   | 809.91   | 767.55   | 642.52   | 648.61   |
| TC0100000438.mm.1 | Gm20257               | 14.08    | 13.90    | 12.04    | 11.17    | 9.77     | 11.04    |
| TC1600000259.mm.1 | Gm23612               | 20.88    | 30.85    | 21.91    | 16.15    | 15.86    | 15.74    |
| TC1900000968.mm.1 |                       | 79.64    | 59.06    | 67.97    | 52.45    | 50.58    | 48.81    |
| TC1800000246.mm.1 |                       | 64.87    | 112.95   | 97.02    | 55.83    | 43.62    | 45.99    |
| TC0200004247.mm.1 |                       | 58.34    | 63.61    | 75.27    | 48.32    | 47.49    | 52.90    |
| TC1500001579.mm.1 |                       | 76.23    | 78.38    | 77.24    | 55.66    | 47.35    | 65.96    |
| TC1000000029.mm.1 | Gm22739               | 273.25   | 217.17   | 236.95   | 181.10   | 133.90   | 176.14   |
| TC0800000492.mm.1 |                       | 147.16   | 182.53   | 150.89   | 97.11    | 77.65    | 121.66   |
| TC0200002079.mm.1 |                       | 18.26    | 23.76    | 22.44    | 13.56    | 15.53    | 16.68    |
| TC0900002527.mm.1 |                       | 52.85    | 63.33    | 57.52    | 49.93    | 44.16    | 42.84    |

|                   |                        |          |          |          |          |         |         |
|-------------------|------------------------|----------|----------|----------|----------|---------|---------|
| TC1800000947.mm.1 |                        | 69.45    | 71.40    | 65.48    | 43.41    | 52.13   | 58.17   |
| TC0200002740.mm.1 | Gm14301                | 25.74    | 31.09    | 34.24    | 21.37    | 23.20   | 22.80   |
| TC0800002366.mm.1 |                        | 791.90   | 882.45   | 690.04   | 534.95   | 382.34  | 564.46  |
| TC0X00002287.mm.1 | Gm14650                | 1230.17  | 1229.34  | 1397.34  | 1050.99  | 727.47  | 867.28  |
| TC1000000270.mm.1 |                        | 1892.35  | 1780.48  | 1993.10  | 1637.30  | 1256.47 | 1249.85 |
| TC0X00001290.mm.1 |                        | 42.46    | 44.28    | 37.89    | 28.09    | 27.59   | 35.55   |
| TC0900002456.mm.1 |                        | 18.09    | 19.19    | 19.86    | 16.06    | 12.37   | 15.01   |
| TC0300001793.mm.1 |                        | 600.51   | 702.71   | 632.72   | 474.90   | 438.25  | 554.34  |
| TC1600000619.mm.1 |                        | 32.87    | 37.63    | 28.26    | 20.35    | 25.54   | 23.14   |
| TC0X00002506.mm.1 | Gm14742; RP23-91C19.8  | 23.23    | 30.34    | 25.91    | 19.44    | 21.07   | 19.46   |
| TC0X00002208.mm.1 |                        | 77.68    | 89.23    | 92.12    | 57.91    | 35.88   | 57.33   |
| TC1100000275.mm.1 | Gm12080                | 27.52    | 28.25    | 35.16    | 21.67    | 17.72   | 23.12   |
| TC1100001749.mm.1 |                        | 23.09    | 26.63    | 35.79    | 18.66    | 18.05   | 14.93   |
| TC0500001313.mm.1 |                        | 116.33   | 163.63   | 135.51   | 100.84   | 74.48   | 90.37   |
| TC0200000125.mm.1 | Mir467a-3              | 139.53   | 161.77   | 151.32   | 91.59    | 110.81  | 124.40  |
| TC0200000143.mm.1 | Mir467a-6              | 139.53   | 161.77   | 151.32   | 91.59    | 110.81  | 124.40  |
| TC0200000173.mm.1 | Mir467a-10             | 139.53   | 161.77   | 151.32   | 91.59    | 110.81  | 124.40  |
| TC0400003658.mm.1 | Gm13215                | 846.45   | 861.16   | 978.97   | 757.37   | 557.97  | 584.65  |
| TC0600001261.mm.1 | Gm26982; RP23-392K24.4 | 23.58    | 21.89    | 20.70    | 19.58    | 16.22   | 16.47   |
| TC0200000788.mm.1 |                        | 66.65    | 81.79    | 75.86    | 58.28    | 45.27   | 57.08   |
| TC1400001316.mm.1 |                        | 51.21    | 53.64    | 35.46    | 17.99    | 29.51   | 25.47   |
| TC1600000200.mm.1 |                        | 80.60    | 68.16    | 80.76    | 60.06    | 47.03   | 59.23   |
| TC0200003613.mm.1 |                        | 56.72    | 44.14    | 44.43    | 21.33    | 26.72   | 35.60   |
| TC1300002727.mm.1 |                        | 36.99    | 48.09    | 46.70    | 29.92    | 26.96   | 34.44   |
| TC0600000844.mm.1 |                        | 111.90   | 101.38   | 112.10   | 73.58    | 91.46   | 64.45   |
| TC0500000563.mm.1 |                        | 36.39    | 46.74    | 41.61    | 33.81    | 30.03   | 27.94   |
| TC1200001149.mm.1 | AF357426               | 270.02   | 271.19   | 335.46   | 209.12   | 228.40  | 173.12  |
| TC1200001711.mm.1 |                        | 33.11    | 39.35    | 38.31    | 20.81    | 19.34   | 29.69   |
| TC1400001313.mm.1 |                        | 32.84    | 49.39    | 40.48    | 24.44    | 27.54   | 18.58   |
| TC0400000950.mm.1 | Mir872                 | 58.74    | 96.66    | 52.04    | 36.20    | 34.90   | 35.01   |
| TC0200000624.mm.1 | Gm13419                | 246.56   | 274.13   | 299.29   | 233.25   | 210.27  | 199.00  |
| TC0500002208.mm.1 |                        | 132.38   | 115.27   | 98.17    | 87.23    | 86.57   | 79.00   |
| TC1700000867.mm.1 | Gm25008                | 1412.93  | 1233.66  | 1452.41  | 1152.85  | 1001.90 | 1126.49 |
| TC1100003123.mm.1 | Gm12321                | 500.64   | 397.07   | 390.34   | 343.90   | 297.98  | 295.58  |
| TC1600000420.mm.1 |                        | 123.68   | 165.82   | 142.55   | 81.89    | 93.03   | 111.68  |
| TC0800001978.mm.1 | Gm8051                 | 23.17    | 24.58    | 25.47    | 21.10    | 15.42   | 16.05   |
| TC0300000599.mm.1 | Gm24544                | 38.52    | 33.92    | 33.15    | 30.73    | 25.92   | 25.41   |
| TC0400003907.mm.1 | Gm13018; RP23-416J8.1  | 205.68   | 198.92   | 231.38   | 164.28   | 145.00  | 109.06  |
| TC0900003214.mm.1 |                        | 24.18    | 26.39    | 31.24    | 21.51    | 14.77   | 16.21   |
| TC1800000225.mm.1 |                        | 2573.70  | 2384.05  | 2655.49  | 1904.85  | 1101.59 | 1536.26 |
| TC1700002748.mm.1 | Gm15405; RP23-75D10.1  | 83.25    | 79.07    | 79.39    | 53.61    | 71.22   | 57.10   |
| TC0400001702.mm.1 | Gm25772                | 13050.07 | 10960.26 | 13059.85 | 10507.26 | 8710.37 | 9002.13 |
| TC1500001913.mm.1 |                        | 67.97    | 80.96    | 74.50    | 50.96    | 63.95   | 51.50   |
| TC0X00001614.mm.1 |                        | 63.99    | 83.06    | 63.83    | 46.86    | 36.31   | 51.47   |
| TC0700003494.mm.1 |                        | 35.75    | 39.02    | 38.16    | 27.78    | 33.91   | 27.79   |
| TC0500000929.mm.1 |                        | 264.43   | 340.94   | 279.66   | 203.19   | 177.58  | 233.40  |
| TC0700001809.mm.1 | Gm20367                | 231.84   | 202.60   | 222.73   | 186.67   | 145.25  | 168.88  |
| TC1000001778.mm.1 |                        | 37.59    | 41.72    | 30.24    | 22.67    | 21.20   | 28.02   |
| TC0700001092.mm.1 |                        | 32.59    | 25.59    | 33.45    | 22.43    | 21.15   | 23.73   |
| TC0600002753.mm.1 |                        | 41.99    | 33.27    | 35.26    | 30.32    | 27.40   | 27.58   |
| TC0600002179.mm.1 |                        | 43.57    | 38.50    | 44.53    | 29.91    | 31.95   | 36.79   |
| TC0800001004.mm.1 |                        | 35.38    | 43.99    | 43.12    | 26.85    | 31.00   | 32.71   |
| TC0500000460.mm.1 |                        | 173.96   | 277.08   | 259.81   | 104.00   | 121.31  | 155.68  |
| TC1900000453.mm.1 |                        | 689.18   | 846.10   | 664.36   | 459.82   | 535.63  | 578.51  |
| TC0900000555.mm.1 |                        | 103.42   | 85.49    | 83.96    | 74.57    | 56.19   | 61.79   |
| TC0X00002552.mm.1 |                        | 422.70   | 532.69   | 422.54   | 318.53   | 267.14  | 358.47  |
| TC0200000687.mm.1 |                        | 42.91    | 40.89    | 33.96    | 31.57    | 30.26   | 30.49   |
| TC1700000212.mm.1 |                        | 76.58    | 105.72   | 84.74    | 68.24    | 59.39   | 59.76   |
| TC1400001254.mm.1 | Gm19845                | 29.31    | 26.32    | 33.40    | 16.76    | 19.39   | 23.74   |
| TC0800001368.mm.1 |                        | 37.61    | 35.78    | 37.59    | 26.13    | 28.13   | 33.29   |
| TC1000000429.mm.1 | Gm27731                | 299.69   | 354.21   | 240.37   | 191.53   | 122.60  | 182.75  |
| TC0600002897.mm.1 | n-R5s165               | 57.82    | 45.07    | 62.72    | 38.22    | 36.00   | 41.31   |
| TC0400000635.mm.1 |                        | 21.58    | 22.20    | 20.85    | 19.08    | 14.52   | 16.13   |
| TC0400003062.mm.1 | Gm12651; RP23-3E2.2    | 447.40   | 380.48   | 377.20   | 294.35   | 222.42  | 309.73  |
| TC0300000488.mm.1 |                        | 93.87    | 118.98   | 97.38    | 55.90    | 76.37   | 74.70   |
| TC1200001232.mm.1 |                        | 38.71    | 31.97    | 41.76    | 30.17    | 26.21   | 26.72   |
| TC0300000073.mm.1 |                        | 291.92   | 241.85   | 164.48   | 130.29   | 136.53  | 115.30  |
| TC0500000574.mm.1 |                        | 291.92   | 241.85   | 164.48   | 130.29   | 136.53  | 115.30  |
| TC0800001607.mm.1 |                        | 291.92   | 241.85   | 164.48   | 130.29   | 136.53  | 115.30  |
| TC1200000534.mm.1 |                        | 291.92   | 241.85   | 164.48   | 130.29   | 136.53  | 115.30  |
| TC1500000226.mm.1 |                        | 29.25    | 30.86    | 30.78    | 25.91    | 19.93   | 24.29   |
| TC1700001298.mm.1 |                        | 18.93    | 20.36    | 19.61    | 17.84    | 14.70   | 14.57   |
| TC1300001227.mm.1 |                        | 19.95    | 16.00    | 16.90    | 12.83    | 14.77   | 12.84   |
| TC1200001680.mm.1 |                        | 364.63   | 346.12   | 296.78   | 247.65   | 201.72  | 267.79  |
| TC1200000360.mm.1 |                        | 111.48   | 136.75   | 118.57   | 71.61    | 75.14   | 100.70  |
| TC0700000947.mm.1 |                        | 19.90    | 19.83    | 19.37    | 15.35    | 17.45   | 13.39   |
| TC0400001476.mm.1 |                        | 186.42   | 203.59   | 186.35   | 156.58   | 100.17  | 122.85  |
| TC1600000884.mm.1 |                        | 74.13    | 62.10    | 64.29    | 42.42    | 27.26   | 46.53   |
| TC0200000590.mm.1 | Gm26236                | 1359.73  | 1442.22  | 1443.17  | 1138.75  | 870.85  | 1147.80 |
| TC0400000892.mm.1 | Gm13284                | 114.45   | 95.15    | 72.79    | 58.81    | 45.87   | 61.40   |

|                   |                        |           |           |           |           |           |           |
|-------------------|------------------------|-----------|-----------|-----------|-----------|-----------|-----------|
| TC040000482.mm.1  |                        | 16.55     | 14.11     | 15.94     | 11.04     | 13.20     | 12.60     |
| TC0700001095.mm.1 |                        | 155.24    | 174.40    | 200.14    | 135.19    | 132.65    | 142.65    |
| TC0500003701.mm.1 |                        | 24.38     | 29.53     | 25.40     | 18.66     | 15.01     | 21.10     |
| TC1100002483.mm.1 | Rpsa-ps4               | 347.00    | 298.10    | 266.12    | 241.28    | 228.75    | 231.01    |
| TC0X00003109.mm.1 |                        | 22.99     | 26.89     | 32.52     | 19.44     | 17.95     | 20.31     |
| TC0100001797.mm.1 |                        | 38.36     | 32.74     | 37.08     | 29.75     | 21.15     | 25.32     |
| TC0400002910.mm.1 | Gm11261; RP23-189G9.1  | 295.23    | 296.95    | 260.33    | 215.75    | 182.84    | 239.99    |
| TC0600002830.mm.1 |                        | 38.22     | 46.75     | 47.43     | 34.16     | 31.48     | 24.86     |
| TC0100003118.mm.1 |                        | 102.72    | 129.32    | 116.37    | 77.38     | 45.52     | 73.91     |
| TC0100002968.mm.1 |                        | 33.25     | 34.16     | 26.90     | 20.96     | 25.71     | 21.70     |
| TC0800002474.mm.1 |                        | 50.87     | 69.30     | 51.29     | 32.97     | 42.00     | 38.89     |
| TC0300002649.mm.1 |                        | 54.06     | 71.07     | 45.06     | 34.95     | 36.53     | 36.91     |
| TC1900000997.mm.1 | Gm8034                 | 108935.20 | 104160.00 | 135339.80 | 89304.27  | 59063.51  | 71408.67  |
| TC0800002498.mm.1 |                        | 202.02    | 207.21    | 197.48    | 123.98    | 92.75     | 158.41    |
| TC0X00001966.mm.1 | Gm27910                | 3124.83   | 3418.09   | 2558.69   | 1703.96   | 850.71    | 1705.34   |
| TC0100003494.mm.1 |                        | 31.45     | 26.68     | 24.79     | 16.88     | 22.43     | 19.17     |
| TC1600000985.mm.1 | 1110008E08Rik          | 17.90     | 15.71     | 17.53     | 13.05     | 14.98     | 11.98     |
| TC0X00001273.mm.1 |                        | 41.37     | 55.18     | 46.77     | 34.76     | 32.69     | 37.86     |
| TC1700000051.mm.1 | n-R5s26                | 156.69    | 181.75    | 143.19    | 51.04     | 72.21     | 111.49    |
| TC1500001493.mm.1 |                        | 107.21    | 157.44    | 96.39     | 51.46     | 56.42     | 79.99     |
| TC0500000741.mm.1 |                        | 17.52     | 20.79     | 20.07     | 15.80     | 15.63     | 16.92     |
| TC0300000603.mm.1 |                        | 202.80    | 203.54    | 217.56    | 167.66    | 102.59    | 129.74    |
| TC1700000849.mm.1 | Runx2os1; AC165141.1   | 237.19    | 223.27    | 253.28    | 193.39    | 131.66    | 167.83    |
| TC1200000764.mm.1 |                        | 409.45    | 520.29    | 430.38    | 316.26    | 265.21    | 359.95    |
| TC1300000533.mm.1 |                        | 409.45    | 520.29    | 430.38    | 316.26    | 265.21    | 359.95    |
| TC1500001235.mm.1 |                        | 409.45    | 520.29    | 430.38    | 316.26    | 265.21    | 359.95    |
| TC1800000149.mm.1 |                        | 409.45    | 520.29    | 430.38    | 316.26    | 265.21    | 359.95    |
| TC0900000331.mm.1 |                        | 118.57    | 139.73    | 131.66    | 112.20    | 86.49     | 92.90     |
| TC0600001157.mm.1 |                        | 179.76    | 200.25    | 223.31    | 90.57     | 102.77    | 156.43    |
| TC0500002463.mm.1 | Gm23967                | 181820.70 | 174313.30 | 167942.20 | 161004.10 | 139285.20 | 135845.30 |
| TC0200000068.mm.1 |                        | 1229.84   | 1382.97   | 1019.17   | 898.22    | 607.08    | 782.67    |
| TC1100000646.mm.1 | LOC100862216           | 22775.68  | 22246.63  | 23004.60  | 18533.94  | 12588.89  | 16481.15  |
| TC0X00001616.mm.1 |                        | 58.95     | 46.38     | 51.95     | 36.84     | 38.45     | 43.68     |
| TC0200002717.mm.1 |                        | 82.27     | 66.40     | 60.83     | 51.93     | 43.44     | 52.05     |
| TC0200003223.mm.1 | Gm13372                | 48.18     | 35.62     | 44.32     | 30.45     | 23.62     | 31.20     |
| TC0100000539.mm.1 |                        | 54.56     | 80.44     | 68.34     | 43.31     | 28.57     | 43.33     |
| TC0900002808.mm.1 | 9330159M07Rik          | 102.02    | 99.07     | 90.38     | 78.90     | 78.15     | 88.35     |
| TC0100002317.mm.1 |                        | 63.81     | 96.41     | 80.85     | 56.42     | 49.74     | 53.22     |
| TC1200000405.mm.1 |                        | 144.76    | 151.26    | 191.31    | 121.19    | 78.19     | 100.71    |
| TC1500000178.mm.1 |                        | 35.79     | 42.72     | 29.29     | 25.43     | 23.63     | 25.44     |
| TC0600002297.mm.1 | Gm15572                | 38.04     | 35.88     | 42.65     | 29.82     | 34.09     | 29.43     |
| TC0800001929.mm.1 |                        | 50.35     | 44.91     | 50.67     | 41.46     | 31.66     | 37.47     |
| TC0300000023.mm.1 |                        | 48.51     | 62.22     | 64.62     | 40.88     | 45.77     | 40.68     |
| TC0X00001967.mm.1 | Gm27839                | 2213.80   | 2296.47   | 1802.48   | 1218.80   | 595.46    | 1185.25   |
| TC1200001171.mm.1 | Mir323                 | 16.04     | 11.46     | 12.23     | 9.99      | 8.83      | 8.21      |
| TC0200003306.mm.1 | Gm23369                | 686.23    | 709.32    | 813.74    | 634.14    | 491.79    | 506.28    |
| TC0600001597.mm.1 |                        | 129013.70 | 151480.30 | 151473.10 | 101992.40 | 120854.20 | 117197.60 |
| TC0900003211.mm.1 |                        | 25.34     | 27.84     | 28.99     | 23.45     | 18.01     | 21.12     |
| TC1100004004.mm.1 |                        | 15.62     | 19.67     | 17.84     | 11.64     | 12.22     | 14.82     |
| TC1100003449.mm.1 |                        | 3348.67   | 3391.20   | 3029.97   | 2614.93   | 2608.48   | 2965.87   |
| TC1200001082.mm.1 |                        | 57.31     | 51.47     | 58.31     | 49.97     | 41.81     | 42.63     |
| TC1500000038.mm.1 |                        | 116.96    | 135.96    | 105.05    | 59.22     | 77.19     | 90.86     |
| TC0200004041.mm.1 | Gm13765; RP23-309M6.3  | 617.68    | 774.09    | 640.82    | 433.09    | 298.69    | 490.47    |
| TC0100002958.mm.1 |                        | 22.70     | 17.74     | 22.38     | 16.68     | 15.74     | 15.54     |
| TC1300002746.mm.1 |                        | 66.17     | 56.34     | 52.90     | 41.31     | 41.14     | 49.31     |
| TC0X00001145.mm.1 | Gm14897                | 1724.83   | 1977.44   | 2081.80   | 1464.66   | 975.98    | 1350.89   |
| TC1400001317.mm.1 |                        | 19.76     | 16.26     | 21.11     | 12.24     | 15.38     | 11.26     |
| TC1600000868.mm.1 | Gm21816                | 49.60     | 70.83     | 66.23     | 26.21     | 41.34     | 38.68     |
| TC1100000868.mm.1 |                        | 49.00     | 46.81     | 41.47     | 40.23     | 34.04     | 35.09     |
| TC0700001277.mm.1 |                        | 155.31    | 246.65    | 203.45    | 130.23    | 119.06    | 133.71    |
| TC1200001368.mm.1 |                        | 86.98     | 109.73    | 70.72     | 63.94     | 44.11     | 44.77     |
| TC1800000348.mm.1 | Vaultrc5               | 34.61     | 44.30     | 36.48     | 31.29     | 26.76     | 24.08     |
| TC1800001093.mm.1 | Gm7847                 | 8553.92   | 7034.70   | 6433.67   | 5897.14   | 4880.31   | 4615.23   |
| TC0200000252.mm.1 | Gm13312                | 100.94    | 79.88     | 93.41     | 69.66     | 40.54     | 52.27     |
| TC0200000030.mm.1 |                        | 137.27    | 151.05    | 130.29    | 81.78     | 77.72     | 116.87    |
| TC1300002394.mm.1 |                        | 26.88     | 32.93     | 30.44     | 19.06     | 24.83     | 22.53     |
| TC1000000177.mm.1 | Gm1972                 | 82.73     | 100.06    | 97.64     | 80.28     | 67.32     | 67.16     |
| TC1000000102.mm.1 |                        | 37.33     | 51.03     | 30.22     | 22.41     | 25.39     | 22.57     |
| TC0700003713.mm.1 |                        | 47.24     | 40.14     | 51.66     | 36.72     | 26.16     | 31.69     |
| TC0100000218.mm.1 |                        | 67.59     | 89.22     | 75.77     | 53.86     | 46.27     | 61.44     |
| TC0500000568.mm.1 |                        | 22.62     | 31.61     | 38.34     | 18.54     | 19.33     | 16.38     |
| TC1200000722.mm.1 |                        | 18.60     | 19.10     | 17.91     | 11.94     | 16.40     | 12.87     |
| TC1100001421.mm.1 |                        | 146.10    | 155.59    | 137.96    | 89.65     | 48.03     | 92.77     |
| TC1300002159.mm.1 |                        | 35919.57  | 36521.63  | 34603.80  | 30953.57  | 23058.69  | 27727.51  |
| TC1200002245.mm.1 |                        | 101.01    | 145.97    | 116.48    | 91.49     | 65.93     | 71.24     |
| TC1000002087.mm.1 | LOC100862325           | 439.36    | 294.33    | 287.79    | 174.86    | 122.69    | 219.22    |
| TC0X00000492.mm.1 | Gm6591                 | 14.56     | 13.49     | 14.00     | 12.74     | 10.22     | 10.25     |
| TC1600000444.mm.1 |                        | 78.12     | 86.31     | 72.37     | 66.23     | 45.52     | 47.25     |
| TC1700000175.mm.1 |                        | 191.45    | 180.97    | 189.40    | 126.85    | 143.36    | 166.91    |
| TC1100002722.mm.1 | Gm11187; RP23-388J21.1 | 142.20    | 154.06    | 150.33    | 130.21    | 92.82     | 101.96    |

|                   |                           |          |          |           |          |          |          |
|-------------------|---------------------------|----------|----------|-----------|----------|----------|----------|
| TC0800002943.mm.1 |                           | 163.98   | 191.11   | 168.54    | 75.06    | 120.94   | 120.86   |
| TC0900000088.mm.1 |                           | 67.37    | 65.51    | 83.17     | 30.94    | 52.75    | 43.53    |
| TC1400001885.mm.1 |                           | 332.43   | 353.12   | 423.52    | 255.90   | 172.05   | 261.50   |
| TC1500002060.mm.1 |                           | 21.90    | 18.97    | 23.25     | 18.26    | 16.33    | 15.40    |
| TC0100000178.mm.1 |                           | 464.88   | 361.40   | 322.20    | 247.65   | 183.84   | 267.64   |
| TC1700002364.mm.1 |                           | 464.88   | 361.40   | 322.20    | 247.65   | 183.84   | 267.64   |
| TC1900001325.mm.1 |                           | 43.91    | 49.56    | 40.82     | 29.59    | 20.04    | 32.83    |
| TC1300002398.mm.1 | Gm24498                   | 54.04    | 44.13    | 40.86     | 34.99    | 36.15    | 34.73    |
| TC1400001261.mm.1 |                           | 69.96    | 103.25   | 73.60     | 57.37    | 47.04    | 54.51    |
| TC0X00001706.mm.1 |                           | 75.90    | 90.84    | 86.23     | 49.30    | 60.82    | 69.00    |
| TC0900001947.mm.1 |                           | 17.80    | 19.54    | 19.81     | 13.16    | 16.54    | 15.47    |
| TC0200000700.mm.1 | Gm13588                   | 37312.64 | 31720.67 | 47178.24  | 27945.93 | 16253.47 | 18843.47 |
| TC1800000876.mm.1 |                           | 255.77   | 288.52   | 212.14    | 198.35   | 168.56   | 180.21   |
| TC0600000391.mm.1 |                           | 15.55    | 18.45    | 13.64     | 11.58    | 11.12    | 12.51    |
| TC0500001563.mm.1 |                           | 101.88   | 85.61    | 116.48    | 53.54    | 73.85    | 71.47    |
| TC1900001047.mm.1 |                           | 403.35   | 602.29   | 509.45    | 347.55   | 290.74   | 353.11   |
| TC1200001695.mm.1 |                           | 21.18    | 22.00    | 16.94     | 11.58    | 14.83    | 15.09    |
| TC1500002013.mm.1 |                           | 120.45   | 106.28   | 107.53    | 82.47    | 48.29    | 72.32    |
| TC1000002662.mm.1 | Gm26180                   | 2061.50  | 1916.73  | 2336.42   | 1763.69  | 1388.88  | 1607.18  |
| TC0900001799.mm.1 |                           | 17.04    | 19.23    | 23.07     | 13.01    | 15.80    | 12.29    |
| TC0400002816.mm.1 |                           | 219.84   | 268.42   | 170.84    | 115.79   | 87.62    | 148.95   |
| TC0600001262.mm.1 | LOC100504971              | 367.64   | 410.74   | 383.34    | 232.11   | 278.76   | 329.33   |
| TC1200002336.mm.1 |                           | 16.39    | 18.30    | 19.38     | 15.77    | 13.83    | 12.88    |
| TC1200000949.mm.1 |                           | 831.58   | 876.31   | 949.18    | 783.04   | 605.77   | 610.99   |
| TC0X00000498.mm.1 | Gm16431                   | 16.00    | 13.85    | 14.80     | 12.75    | 9.99     | 11.78    |
| TC1600000669.mm.1 | Gm10808                   | 154.94   | 146.71   | 157.11    | 116.32   | 72.38    | 106.50   |
| TC0500002787.mm.1 |                           | 210.70   | 202.61   | 187.17    | 168.30   | 124.08   | 153.97   |
| TC1900001061.mm.1 |                           | 74.74    | 59.77    | 51.22     | 41.89    | 42.74    | 31.03    |
| TC1200002258.mm.1 |                           | 80.92    | 87.63    | 69.50     | 61.71    | 61.76    | 48.75    |
| TC0400002393.mm.1 |                           | 344.98   | 413.44   | 324.83    | 247.15   | 259.39   | 300.71   |
| TC0900000900.mm.1 |                           | 25.97    | 21.27    | 21.67     | 13.97    | 19.10    | 15.87    |
| TC0X00000857.mm.1 | Gm16412                   | 12633.68 | 11305.71 | 13554.09  | 10785.35 | 8228.56  | 8753.51  |
| TC1300001306.mm.1 |                           | 26.33    | 29.36    | 24.52     | 16.26    | 19.86    | 22.12    |
| TC0X00001256.mm.1 |                           | 214.55   | 344.05   | 214.50    | 137.63   | 169.17   | 125.28   |
| TC0200001016.mm.1 |                           | 35.70    | 33.23    | 34.89     | 31.11    | 23.63    | 25.45    |
| TC1500000176.mm.1 |                           | 74.00    | 67.11    | 70.42     | 44.49    | 61.82    | 49.38    |
| TC0300002651.mm.1 |                           | 73.30    | 78.06    | 88.35     | 59.24    | 67.42    | 51.14    |
| TC0X00001437.mm.1 | Gm15057                   | 58.03    | 51.74    | 40.49     | 38.33    | 31.01    | 31.14    |
| TC0700001267.mm.1 | Prss23os; RP24-64C6.1     | 121.44   | 109.14   | 102.31    | 81.46    | 64.30    | 90.43    |
| TC0600001835.mm.1 | Gm22155                   | 7414.47  | 5403.92  | 5589.91   | 4540.03  | 2708.12  | 2487.65  |
| TC1800000817.mm.1 |                           | 43.44    | 39.96    | 55.38     | 24.65    | 19.17    | 33.90    |
| TC1600001963.mm.1 |                           | 27.49    | 21.93    | 25.61     | 19.49    | 19.85    | 20.84    |
| TC1700002705.mm.1 |                           | 40.99    | 35.77    | 33.01     | 29.64    | 23.33    | 28.32    |
| TC1500000435.mm.1 |                           | 66.90    | 85.11    | 78.73     | 47.89    | 60.93    | 58.68    |
| TC0600003293.mm.1 | Gm23375                   | 4712.78  | 4902.13  | 4542.46   | 3311.08  | 2631.91  | 3948.30  |
| TC1200000365.mm.1 |                           | 118.93   | 137.56   | 135.91    | 111.24   | 80.24    | 93.23    |
| TC1900000783.mm.1 |                           | 57.59    | 80.48    | 76.46     | 52.73    | 51.19    | 45.15    |
| TC1700000524.mm.1 |                           | 52.81    | 48.83    | 49.09     | 42.12    | 27.53    | 33.91    |
| TC0700001670.mm.1 |                           | 24.57    | 21.62    | 21.88     | 10.64    | 15.95    | 16.83    |
| TC0100003703.mm.1 |                           | 49.65    | 74.63    | 63.33     | 25.75    | 28.84    | 45.18    |
| TC0600000310.mm.1 |                           | 35.04    | 28.72    | 26.55     | 20.72    | 21.09    | 24.50    |
| TC1400001071.mm.1 |                           | 34.15    | 47.95    | 39.81     | 24.72    | 31.03    | 28.23    |
| TC1100002325.mm.1 | Mir1933                   | 58.57    | 72.90    | 60.09     | 53.45    | 42.73    | 46.27    |
| TC1300002728.mm.1 |                           | 63.10    | 59.99    | 67.64     | 40.15    | 32.69    | 52.42    |
| TC1300001963.mm.1 |                           | 48.09    | 79.01    | 57.63     | 39.66    | 36.89    | 27.91    |
| TC1500000486.mm.1 |                           | 37.49    | 46.85    | 45.15     | 30.23    | 36.39    | 31.54    |
| TC1200001303.mm.1 | Gm19349                   | 99.99    | 131.80   | 114.31    | 85.00    | 63.07    | 85.40    |
| TC1500000140.mm.1 | Gm25101                   | 7331.42  | 6593.87  | 7294.05   | 5940.60  | 4454.35  | 5570.40  |
| TC1000001201.mm.1 |                           | 206.92   | 296.29   | 239.65    | 164.71   | 150.31   | 188.62   |
| TC1500001454.mm.1 |                           | 18.84    | 20.02    | 16.95     | 16.43    | 13.52    | 13.42    |
| TC1500002179.mm.1 | Snora2b                   | 89.53    | 95.43    | 80.83     | 70.99    | 63.30    | 76.94    |
| TC0300001690.mm.1 | Gm23686                   | 95427.80 | 94142.35 | 105883.30 | 81319.49 | 52282.68 | 65186.72 |
| TC0800001825.mm.1 |                           | 42115.10 | 44097.80 | 40220.99  | 32271.84 | 29589.87 | 37982.59 |
| TC0X00003296.mm.1 |                           | 36.45    | 30.39    | 36.12     | 16.51    | 23.16    | 26.13    |
| TC1700002302.mm.1 |                           | 73.52    | 67.20    | 72.04     | 49.05    | 40.56    | 60.25    |
| TC0100001922.mm.1 | 4732440D04Rik; AC139064.2 | 67.62    | 66.02    | 58.84     | 55.65    | 45.28    | 52.22    |
| TC1300000999.mm.1 |                           | 25.45    | 33.56    | 22.28     | 18.38    | 18.11    | 18.65    |
| TC0300000315.mm.1 |                           | 20.35    | 26.07    | 21.77     | 18.79    | 16.37    | 17.20    |
| TC1400000129.mm.1 |                           | 52.64    | 44.18    | 52.80     | 40.97    | 35.70    | 41.49    |
| TC0700001142.mm.1 |                           | 144.86   | 188.89   | 171.07    | 134.81   | 118.79   | 131.30   |
| TC0400000054.mm.1 |                           | 51.37    | 54.41    | 52.99     | 30.57    | 34.81    | 45.78    |
| TC0700003840.mm.1 | Gm7027                    | 2498.14  | 1927.62  | 2330.27   | 1847.94  | 1542.31  | 1656.28  |
| TC1200000221.mm.1 |                           | 139.58   | 126.84   | 117.33    | 112.60   | 98.63    | 93.08    |
| TC0200001060.mm.1 | Ak3l2-ps                  | 112.28   | 149.07   | 127.31    | 102.95   | 98.76    | 96.00    |
| TC1600001291.mm.1 |                           | 32.78    | 33.27    | 30.05     | 28.94    | 23.35    | 25.41    |
| TC1100002500.mm.1 |                           | 124.17   | 149.11   | 120.85    | 82.30    | 85.83    | 110.75   |
| TC0600000219.mm.1 |                           | 240.69   | 304.76   | 249.93    | 174.71   | 220.21   | 189.87   |
| TC0400000478.mm.1 |                           | 80.62    | 108.67   | 91.65     | 55.06    | 61.68    | 74.91    |
| TC0100000586.mm.1 |                           | 241.07   | 285.53   | 316.15    | 227.76   | 184.54   | 206.77   |
| TC1000001588.mm.1 |                           | 72.86    | 78.71    | 69.95     | 38.12    | 58.91    | 52.06    |

|                                  |                        |          |          |          |          |          |          |
|----------------------------------|------------------------|----------|----------|----------|----------|----------|----------|
| TC1200001636.mm.1                |                        | 42.36    | 36.97    | 41.22    | 36.41    | 32.21    | 32.05    |
| TC0500000831.mm.1                | Eif5a13-ps             | 8657.98  | 8596.29  | 6953.72  | 6735.86  | 5228.44  | 5679.24  |
| TC1500000219.mm.1                |                        | 51.55    | 62.00    | 54.54    | 42.87    | 40.43    | 48.94    |
| TC1700000687.mm.1                | Gm8752                 | 60.35    | 71.84    | 71.92    | 46.82    | 47.11    | 58.91    |
| TC1000002617.mm.1                |                        | 19.10    | 15.38    | 20.29    | 14.42    | 13.87    | 13.48    |
| TC1200001951.mm.1                | Mir5135                | 91.94    | 98.50    | 98.06    | 71.54    | 88.53    | 74.62    |
| TC0200000910.mm.1                |                        | 55.08    | 65.19    | 55.98    | 42.46    | 43.51    | 51.60    |
| TC0500001463.mm.1                |                        | 19.63    | 17.34    | 19.12    | 17.08    | 14.96    | 14.97    |
| TC0800000914.mm.1                |                        | 62.26    | 77.72    | 65.98    | 50.32    | 36.28    | 51.95    |
| TC1400002404.mm.1                |                        | 19.82    | 16.71    | 22.20    | 14.51    | 13.84    | 15.83    |
| TC1500000817.mm.1                |                        | 44.46    | 55.14    | 46.59    | 38.88    | 28.00    | 35.66    |
| TC0500002513.mm.1                |                        | 20.84    | 23.72    | 28.14    | 14.96    | 19.26    | 17.09    |
| TC1300000108.mm.1                |                        | 27.05    | 26.61    | 27.20    | 21.41    | 25.19    | 20.59    |
| TC0400001704.mm.1                |                        | 149.77   | 186.29   | 156.44   | 136.42   | 123.54   | 107.32   |
| TC1700000848.mm.1                | Runx2os2; RP24-535G5.2 | 12.16    | 14.66    | 14.32    | 11.23    | 11.01    | 9.08     |
| TC0800002937.mm.1                | Gm24103                | 1751.47  | 1348.25  | 1599.08  | 1304.75  | 1051.96  | 1035.44  |
| TC0100000728.mm.1                |                        | 37.23    | 36.36    | 37.39    | 24.06    | 25.68    | 33.22    |
| TC0100000745.mm.1                |                        | 37.23    | 36.36    | 37.39    | 24.06    | 25.68    | 33.22    |
| TC0100000759.mm.1                |                        | 37.23    | 36.36    | 37.39    | 24.06    | 25.68    | 33.22    |
| TC0100002710.mm.1                |                        | 37.23    | 36.36    | 37.39    | 24.06    | 25.68    | 33.22    |
| TC0100002715.mm.1                |                        | 37.23    | 36.36    | 37.39    | 24.06    | 25.68    | 33.22    |
| TC0100002717.mm.1                |                        | 37.23    | 36.36    | 37.39    | 24.06    | 25.68    | 33.22    |
| TC0100002720.mm.1                |                        | 37.23    | 36.36    | 37.39    | 24.06    | 25.68    | 33.22    |
| TC1_GL456210_random00000001.mm.1 |                        | 37.23    | 36.36    | 37.39    | 24.06    | 25.68    | 33.22    |
| TC1_GL456211_random00000007.mm.1 |                        | 37.23    | 36.36    | 37.39    | 24.06    | 25.68    | 33.22    |
| TC1_GL456211_random00000029.mm.1 |                        | 37.23    | 36.36    | 37.39    | 24.06    | 25.68    | 33.22    |
| TC1_GL456212_random00000005.mm.1 |                        | 37.23    | 36.36    | 37.39    | 24.06    | 25.68    | 33.22    |
| TC1_GL456221_random00000011.mm.1 |                        | 37.23    | 36.36    | 37.39    | 24.06    | 25.68    | 33.22    |
| TC1_GL456221_random00000018.mm.1 |                        | 37.23    | 36.36    | 37.39    | 24.06    | 25.68    | 33.22    |
| TC1500000964.mm.1                |                        | 17.20    | 16.50    | 13.68    | 11.03    | 11.43    | 13.34    |
| TC0700004435.mm.1                |                        | 16.34    | 12.55    | 12.96    | 11.42    | 9.20     | 8.84     |
| TC0900002208.mm.1                |                        | 166.32   | 163.82   | 147.98   | 129.79   | 117.75   | 143.02   |
| TC0700000992.mm.1                |                        | 63.58    | 69.79    | 55.00    | 48.43    | 48.65    | 52.59    |
| TC1400000840.mm.1                | Gm16261                | 155.71   | 130.11   | 137.71   | 121.18   | 99.48    | 88.91    |
| TC1800001709.mm.1                |                        | 41.62    | 43.43    | 42.94    | 24.72    | 35.85    | 31.94    |
| TC0600001819.mm.1                | Gm8652                 | 964.91   | 873.84   | 1058.73  | 825.97   | 620.27   | 703.55   |
| TC1200001867.mm.1                | Gm23018                | 124.92   | 129.45   | 150.88   | 108.12   | 70.01    | 91.04    |
| TC1900000688.mm.1                |                        | 88.18    | 111.99   | 80.00    | 61.85    | 63.17    | 72.86    |
| TC1300000057.mm.1                |                        | 23.12    | 18.15    | 26.36    | 16.43    | 16.14    | 14.12    |
| TC0400000034.mm.1                |                        | 84.74    | 124.33   | 101.17   | 63.59    | 44.53    | 72.14    |
| TC1500000042.mm.1                |                        | 79.26    | 102.04   | 86.41    | 74.01    | 53.97    | 52.59    |
| TC0900001550.mm.1                | Gm17396                | 39.93    | 34.84    | 31.90    | 30.41    | 27.15    | 26.92    |
| TC1800001706.mm.1                |                        | 38.55    | 36.71    | 32.64    | 21.22    | 26.51    | 29.85    |
| TC0400003431.mm.1                | Gm12959                | 82.65    | 81.76    | 83.66    | 75.24    | 56.52    | 61.35    |
| TC0X00002484.mm.1                |                        | 26.67    | 33.13    | 22.81    | 16.47    | 20.95    | 18.19    |
| TC0900001687.mm.1                |                        | 20.37    | 23.10    | 23.39    | 20.01    | 16.72    | 17.56    |
| TC0900000297.mm.1                |                        | 43.35    | 48.36    | 41.84    | 37.45    | 27.17    | 33.69    |
| TC0X00001984.mm.1                | Gm27341                | 4952.97  | 5810.54  | 4151.88  | 2853.76  | 1558.28  | 3114.95  |
| TC1100003994.mm.1                |                        | 27.53    | 18.82    | 18.56    | 13.34    | 13.55    | 15.42    |
| TC1000001757.mm.1                |                        | 236.99   | 356.76   | 234.34   | 181.71   | 167.13   | 182.24   |
| TC1200000160.mm.1                |                        | 162.93   | 170.65   | 182.85   | 121.94   | 89.61    | 138.74   |
| TC0100003115.mm.1                |                        | 69.73    | 71.23    | 62.69    | 54.01    | 37.61    | 51.64    |
| TC1100002501.mm.1                |                        | 79.45    | 80.92    | 63.06    | 55.84    | 60.23    | 56.77    |
| TC0700001075.mm.1                | Gm27459                | 807.04   | 907.28   | 522.39   | 436.15   | 236.06   | 384.68   |
| TC0100003359.mm.1                |                        | 27.81    | 34.08    | 20.62    | 16.14    | 18.77    | 15.95    |
| TC0100003336.mm.1                |                        | 61.26    | 96.09    | 55.16    | 42.54    | 38.97    | 41.51    |
| TC1600000990.mm.1                | Gm7831                 | 42.71    | 36.59    | 40.23    | 34.27    | 24.60    | 28.77    |
| TC0400002968.mm.1                |                        | 61.09    | 50.26    | 73.28    | 24.06    | 23.78    | 45.41    |
| TC0100000187.mm.1                | Gm23771                | 110.60   | 117.06   | 107.87   | 103.35   | 87.31    | 84.18    |
| TC1300001219.mm.1                |                        | 19.81    | 23.97    | 18.92    | 17.50    | 13.38    | 14.68    |
| TC1300000413.mm.1                |                        | 39.03    | 35.01    | 37.49    | 25.73    | 25.61    | 33.45    |
| TC0700000294.mm.1                | Gm25134                | 589.33   | 508.63   | 615.63   | 458.83   | 421.12   | 492.90   |
| TC1300000254.mm.1                | Gm22452                | 402.02   | 579.27   | 466.51   | 192.47   | 352.76   | 253.80   |
| TC1000000181.mm.1                | Gm16531                | 66.87    | 82.38    | 81.62    | 65.60    | 52.93    | 55.56    |
| TC1300002381.mm.1                |                        | 243.50   | 307.82   | 224.72   | 190.73   | 137.95   | 183.51   |
| TC0900000961.mm.1                | Gm19353                | 1622.03  | 1468.54  | 1537.52  | 1350.65  | 927.97   | 1046.57  |
| TC0100003330.mm.1                |                        | 96.54    | 108.10   | 92.37    | 73.90    | 88.66    | 73.84    |
| TC0800002446.mm.1                |                        | 83.10    | 108.07   | 99.24    | 71.71    | 58.20    | 76.86    |
| TC0300003114.mm.1                |                        | 39.57    | 50.45    | 43.46    | 30.52    | 32.39    | 37.64    |
| TC0X00002642.mm.1                |                        | 85.95    | 93.25    | 66.07    | 54.27    | 56.52    | 62.79    |
| TC0100003685.mm.1                |                        | 152.47   | 202.62   | 173.37   | 113.23   | 134.56   | 138.69   |
| TC0200004299.mm.1                |                        | 12.09    | 12.19    | 14.51    | 11.24    | 9.39     | 8.97     |
| TC1400002249.mm.1                |                        | 74639.35 | 69068.98 | 74966.00 | 66442.96 | 54310.84 | 51655.19 |
| TC0600001893.mm.1                | LOC100862080           | 292.17   | 237.50   | 193.92   | 168.84   | 117.48   | 158.10   |



|                   |                              |          |          |          |          |          |          |
|-------------------|------------------------------|----------|----------|----------|----------|----------|----------|
| TC100000323.mm.1  |                              | 41.27    | 44.98    | 33.58    | 31.69    | 29.04    | 30.17    |
| TC030000879.mm.1  |                              | 20.32    | 18.40    | 19.55    | 14.60    | 13.64    | 17.63    |
| TC0X0000877.mm.1  |                              | 43.47    | 35.72    | 33.08    | 29.69    | 22.00    | 26.88    |
| TC0X00001840.mm.1 | Gm14473                      | 472.26   | 449.39   | 507.14   | 420.88   | 346.83   | 307.77   |
| TC0200004195.mm.1 | Gm13805; RP23-392O16.1       | 234.70   | 245.68   | 188.29   | 163.74   | 114.38   | 161.34   |
| TC0100002263.mm.1 |                              | 186.49   | 151.74   | 150.44   | 119.06   | 97.52    | 132.51   |
| TC0700003435.mm.1 | Gm23957                      | 52.91    | 44.11    | 51.99    | 41.81    | 29.45    | 27.16    |
| TC0800001819.mm.1 |                              | 278.54   | 341.20   | 273.98   | 219.39   | 129.89   | 194.45   |
| TC0200002840.mm.1 |                              | 84.35    | 100.47   | 78.86    | 73.91    | 59.89    | 64.98    |
| TC0200003598.mm.1 |                              | 84.96    | 99.66    | 98.73    | 65.95    | 81.14    | 57.72    |
| TC1300001498.mm.1 |                              | 16.60    | 22.61    | 21.51    | 14.41    | 13.41    | 15.94    |
| TC1400002129.mm.1 | C030013D06Rik; RP23-121M22.4 | 105.42   | 135.24   | 97.23    | 65.12    | 48.80    | 83.85    |
| TC1100001000.mm.1 |                              | 55.38    | 63.87    | 74.54    | 40.57    | 36.58    | 52.43    |
| TC1600001724.mm.1 |                              | 47.28    | 63.37    | 34.65    | 26.38    | 29.87    | 26.95    |
| TC0400002881.mm.1 |                              | 28.58    | 22.41    | 19.87    | 14.33    | 18.30    | 12.88    |
| TC0200004572.mm.1 | Gm14012; RP23-340F21.2       | 27.90    | 32.06    | 33.58    | 26.82    | 24.62    | 21.66    |
| TC1100000628.mm.1 | Gm24198                      | 105.79   | 127.77   | 133.62   | 90.58    | 91.83    | 64.27    |
| TC0900000932.mm.1 |                              | 361.65   | 471.00   | 394.13   | 335.23   | 312.75   | 309.83   |
| TC1000000189.mm.1 |                              | 75.05    | 81.40    | 62.73    | 49.55    | 19.86    | 15.35    |
| TC1000001875.mm.1 |                              | 75.05    | 81.40    | 62.73    | 49.55    | 19.86    | 15.35    |
| TC0X00001258.mm.1 |                              | 42.59    | 41.26    | 59.84    | 25.41    | 26.33    | 36.36    |
| TC0400003614.mm.1 |                              | 39.11    | 39.61    | 33.15    | 27.15    | 28.68    | 32.63    |
| TC1800001347.mm.1 |                              | 52.89    | 57.58    | 45.12    | 43.12    | 29.98    | 34.07    |
| TC1400001542.mm.1 |                              | 67.55    | 78.65    | 56.53    | 49.13    | 52.03    | 49.67    |
| TC0400000050.mm.1 | Gm25355                      | 75214.18 | 80631.34 | 79951.77 | 69124.98 | 48094.65 | 56338.54 |
| TC0400001074.mm.1 | Gm23064                      | 75214.18 | 80631.34 | 79951.77 | 69124.98 | 48094.65 | 56338.54 |
| TC0400001967.mm.1 | Gm13067; RP23-169H13.4       | 58.43    | 54.90    | 50.57    | 40.88    | 24.80    | 38.12    |
| TC0400002078.mm.1 |                              | 117.50   | 159.63   | 137.85   | 111.55   | 99.37    | 91.38    |
| TC1200000361.mm.1 |                              | 141.98   | 160.89   | 113.00   | 81.63    | 59.55    | 101.65   |
| TC1300001249.mm.1 | Gm15289                      | 105.18   | 99.25    | 109.30   | 82.96    | 83.35    | 97.34    |
| TC1300002650.mm.1 |                              | 11.59    | 13.20    | 12.91    | 9.92     | 10.05    | 11.48    |
| TC1000002908.mm.1 |                              | 85.87    | 77.38    | 104.19   | 58.06    | 65.03    | 71.60    |
| TC0400000636.mm.1 | Gm24277                      | 41.92    | 43.49    | 71.85    | 31.76    | 30.37    | 23.23    |
| TC0700003707.mm.1 | Gm15661                      | 531.59   | 614.86   | 710.11   | 506.33   | 377.15   | 347.98   |
| TC1600000875.mm.1 |                              | 286.91   | 454.82   | 235.08   | 116.13   | 111.13   | 204.66   |
| TC1400001318.mm.1 | B930095G15Rik                | 46.20    | 41.11    | 41.28    | 33.28    | 22.40    | 32.37    |
| TC0800000875.mm.1 |                              | 27.48    | 23.07    | 25.41    | 19.56    | 22.13    | 17.36    |
| TC1800000264.mm.1 | Gm26378                      | 7955.49  | 6842.46  | 7723.91  | 6041.55  | 6060.53  | 6779.94  |
| TC0600003535.mm.1 | E130112N10Rik; Vamp1         | 86.67    | 75.09    | 94.60    | 73.11    | 64.10    | 65.76    |
| TC1900000346.mm.1 |                              | 96.88    | 98.66    | 88.89    | 74.76    | 63.49    | 83.64    |
| TC0100003624.mm.1 |                              | 161.85   | 224.32   | 137.04   | 120.44   | 104.38   | 102.05   |
| TC1400001126.mm.1 |                              | 41.93    | 26.56    | 27.87    | 22.48    | 18.09    | 18.63    |
| TC1200002054.mm.1 |                              | 131.02   | 163.39   | 149.87   | 122.47   | 91.18    | 110.99   |
| TC0700002227.mm.1 |                              | 6172.88  | 6326.55  | 5574.77  | 5518.16  | 4696.24  | 4751.13  |
| TC1000002115.mm.1 |                              | 221.56   | 246.57   | 250.39   | 197.04   | 151.38   | 197.15   |
| TC0600001555.mm.1 |                              | 29.99    | 26.89    | 34.54    | 20.17    | 23.76    | 24.89    |
| TC0400000105.mm.1 |                              | 43468.55 | 49207.21 | 48790.42 | 40856.18 | 31618.38 | 37957.67 |
| TC1200001705.mm.1 |                              | 25.17    | 41.94    | 30.76    | 21.05    | 18.08    | 21.36    |
| TC0600003309.mm.1 |                              | 34.89    | 29.99    | 35.38    | 18.49    | 26.07    | 25.78    |
| TC0200000281.mm.1 |                              | 98.90    | 84.44    | 65.09    | 56.89    | 53.58    | 37.65    |
| TC0300001438.mm.1 |                              | 29.96    | 54.69    | 39.24    | 21.14    | 26.86    | 21.06    |
| TC1200001213.mm.1 | LOC100861856                 | 86.25    | 96.84    | 77.18    | 74.19    | 64.77    | 58.74    |
| TC0100002115.mm.1 | Gm27430                      | 2205.97  | 2964.40  | 1739.29  | 1345.98  | 1040.17  | 1524.58  |
| TC0900002824.mm.1 | Gm16200                      | 8080.49  | 7778.60  | 9120.25  | 7473.63  | 6282.08  | 6128.71  |
| TC1300001312.mm.1 |                              | 53.42    | 49.32    | 39.05    | 32.39    | 37.95    | 32.94    |
| TC1300002630.mm.1 | Mir325                       | 12256.56 | 17537.21 | 15492.95 | 7293.93  | 11579.56 | 8888.92  |
| TC0100001460.mm.1 |                              | 262.55   | 369.97   | 237.04   | 185.59   | 172.29   | 204.81   |
| TC0200000692.mm.1 |                              | 64.17    | 52.02    | 46.31    | 34.25    | 34.72    | 43.79    |
| TC0800001290.mm.1 |                              | 166.11   | 188.37   | 171.84   | 94.04    | 125.22   | 144.39   |
| TC1400001742.mm.1 |                              | 75.90    | 116.16   | 82.45    | 53.61    | 61.64    | 64.07    |
| TC0100003490.mm.1 |                              | 28.07    | 42.53    | 41.62    | 25.52    | 22.11    | 25.29    |
| TC1100003389.mm.1 |                              | 272.28   | 299.98   | 321.28   | 222.69   | 135.13   | 208.43   |
| TC1000000190.mm.1 |                              | 2104.54  | 2212.22  | 2023.06  | 1777.36  | 1183.03  | 1542.37  |
| TC1500000117.mm.1 |                              | 2104.54  | 2212.22  | 2023.06  | 1777.36  | 1183.03  | 1542.37  |
| TC0400000473.mm.1 |                              | 77.61    | 143.38   | 88.38    | 49.50    | 30.35    | 59.56    |
| TC0800000780.mm.1 | Gm27628                      | 283.59   | 455.86   | 266.24   | 203.58   | 137.99   | 195.82   |
| TC0500000089.mm.1 |                              | 52.18    | 64.81    | 47.71    | 41.89    | 39.50    | 42.86    |
| TC1900000305.mm.1 |                              | 19.72    | 25.70    | 21.71    | 16.58    | 16.78    | 18.67    |
| TC1300002584.mm.1 |                              | 145.64   | 166.40   | 159.99   | 100.36   | 110.88   | 139.41   |
| TC0400001718.mm.1 | Mir6399                      | 34.90    | 41.79    | 39.07    | 28.61    | 17.35    | 26.94    |
| TC1400000209.mm.1 |                              | 20.84    | 26.61    | 24.82    | 14.15    | 13.63    | 20.19    |
| TC1700000128.mm.1 |                              | 54.41    | 62.87    | 51.26    | 39.46    | 33.80    | 47.66    |
| TC1600000879.mm.1 |                              | 115.67   | 154.38   | 117.37   | 58.32    | 58.11    | 101.40   |
| TC0X00002693.mm.1 |                              | 31.76    | 31.81    | 30.15    | 28.48    | 21.88    | 21.04    |
| TC1100002137.mm.1 |                              | 17.53    | 22.12    | 23.06    | 16.77    | 15.65    | 15.85    |
| TC0400001860.mm.1 | Gm13224                      | 2467.88  | 2239.87  | 2703.66  | 2102.34  | 1455.54  | 1727.58  |
| TC0200000925.mm.1 |                              | 62.81    | 72.42    | 77.22    | 50.88    | 43.61    | 60.15    |
| TC0400000290.mm.1 |                              | 39.59    | 51.51    | 42.68    | 36.98    | 33.79    | 33.27    |
| TC1500000943.mm.1 |                              | 73.61    | 66.70    | 58.70    | 56.30    | 53.15    | 48.27    |

|                   |                     |          |          |          |          |          |          |
|-------------------|---------------------|----------|----------|----------|----------|----------|----------|
| TC0100000833.mm.1 | Gm25198             | 80.11    | 121.61   | 96.29    | 67.09    | 64.96    | 72.53    |
| TC0800000377.mm.1 |                     | 39.90    | 33.80    | 32.78    | 24.65    | 29.97    | 20.84    |
| TC0400002452.mm.1 | Gm25931             | 2458.68  | 3285.56  | 1864.97  | 1037.84  | 738.91   | 1652.85  |
| TC0900001143.mm.1 |                     | 108.39   | 113.72   | 97.97    | 94.89    | 70.41    | 76.20    |
| TC1100000163.mm.1 |                     | 28.48    | 38.08    | 35.71    | 18.72    | 27.17    | 22.81    |
| TC1500001404.mm.1 |                     | 66.22    | 52.60    | 48.76    | 39.88    | 38.45    | 45.08    |
| TC0300001068.mm.1 |                     | 62.42    | 65.27    | 51.55    | 48.48    | 48.92    | 46.88    |
| TC1100004119.mm.1 |                     | 101.39   | 123.60   | 112.91   | 68.45    | 77.44    | 97.00    |
| TC0400000033.mm.1 | Gm20021             | 51.09    | 61.48    | 61.40    | 48.42    | 47.37    | 49.04    |
| TC0600001311.mm.1 |                     | 175.00   | 126.35   | 182.66   | 75.96    | 82.78    | 123.82   |
| TC1600000909.mm.1 |                     | 175.00   | 126.35   | 182.66   | 75.96    | 82.78    | 123.82   |
| TC0300000454.mm.1 |                     | 191.41   | 323.93   | 222.88   | 142.70   | 73.71    | 135.05   |
| TC1600000481.mm.1 |                     | 51.17    | 44.98    | 48.45    | 42.10    | 27.73    | 28.59    |
| TC0100001109.mm.1 |                     | 94.11    | 112.64   | 94.45    | 73.16    | 39.97    | 64.43    |
| TC0400001548.mm.1 |                     | 57.23    | 74.73    | 73.69    | 54.97    | 52.44    | 48.74    |
| TC1500000252.mm.1 |                     | 80.81    | 100.81   | 78.79    | 54.36    | 54.27    | 73.12    |
| TC1300001213.mm.1 |                     | 25.64    | 32.19    | 33.46    | 18.44    | 24.90    | 21.34    |
| TC1300002232.mm.1 | Gm27501             | 2130.15  | 2609.09  | 2174.11  | 1612.92  | 1027.63  | 1679.86  |
| TC1000002849.mm.1 |                     | 21.31    | 32.17    | 25.21    | 19.00    | 12.85    | 16.85    |
| TC0800002075.mm.1 |                     | 29.68    | 25.69    | 29.35    | 25.22    | 20.58    | 19.21    |
| TC1700002402.mm.1 | Gm24194             | 240.44   | 344.40   | 243.21   | 156.77   | 155.90   | 213.31   |
| TC1900001409.mm.1 | Gm27440             | 820.89   | 958.79   | 800.07   | 606.73   | 379.43   | 625.49   |
| TC1100001951.mm.1 | Gm24323             | 3742.05  | 3653.82  | 3625.02  | 3358.62  | 2519.04  | 2449.78  |
| TC0500002812.mm.1 | Mir703              | 36292.47 | 36074.24 | 41069.50 | 25767.42 | 23596.72 | 33453.02 |
| TC1500001914.mm.1 |                     | 113.11   | 160.58   | 133.43   | 76.42    | 63.90    | 106.05   |
| TC1600000871.mm.1 |                     | 132.11   | 153.58   | 95.61    | 76.07    | 62.28    | 90.20    |
| TC0900001412.mm.1 |                     | 50.81    | 72.56    | 61.06    | 47.76    | 43.67    | 42.21    |
| TC1400000814.mm.1 |                     | 23.85    | 34.01    | 30.64    | 19.34    | 23.25    | 19.54    |
| TC1500000061.mm.1 |                     | 13.29    | 16.02    | 16.33    | 12.58    | 12.68    | 11.09    |
| TC0100002695.mm.1 |                     | 66.95    | 83.86    | 69.46    | 56.81    | 35.16    | 49.79    |
| TC1100003242.mm.1 |                     | 54.48    | 37.17    | 61.03    | 29.02    | 35.56    | 29.37    |
| TC0400002173.mm.1 | Gm11794             | 366.84   | 376.60   | 311.72   | 284.90   | 306.03   | 286.73   |
| TC1900000472.mm.1 | Pten                | 578.98   | 616.57   | 538.69   | 418.88   | 309.90   | 475.11   |
| TC1000002412.mm.1 |                     | 77.87    | 82.32    | 77.91    | 66.18    | 44.27    | 59.82    |
| TC1100000795.mm.1 |                     | 125.32   | 180.66   | 113.40   | 90.79    | 52.64    | 82.06    |
| TC1800000972.mm.1 | Gm26244             | 188.08   | 181.03   | 232.59   | 145.14   | 124.74   | 165.75   |
| TC0300002175.mm.1 |                     | 57.73    | 45.44    | 54.05    | 37.63    | 43.65    | 41.98    |
| TC0700002737.mm.1 |                     | 1019.90  | 1054.19  | 990.94   | 901.94   | 814.20   | 665.82   |
| TC1300000933.mm.1 |                     | 19.45    | 19.87    | 18.04    | 12.03    | 15.13    | 16.49    |
| TC1500002287.mm.1 |                     | 40.66    | 39.25    | 41.72    | 31.55    | 25.86    | 35.80    |
| TC1300001906.mm.1 | Hsp25-ps1           | 4201.87  | 3163.19  | 2927.63  | 2501.28  | 1742.35  | 2342.70  |
| TC1100000154.mm.1 |                     | 220.39   | 214.98   | 178.45   | 172.52   | 129.06   | 112.91   |
| TC1800000602.mm.1 |                     | 18.01    | 16.49    | 18.73    | 10.76    | 11.85    | 15.70    |
| TC1800000053.mm.1 |                     | 84.98    | 117.89   | 107.09   | 59.55    | 46.12    | 79.80    |
| TC1600000545.mm.1 |                     | 93.74    | 100.58   | 68.54    | 58.44    | 48.15    | 65.15    |
| TC1600001463.mm.1 |                     | 24.01    | 23.45    | 20.39    | 18.72    | 17.63    | 20.15    |
| TC0800000508.mm.1 |                     | 751.61   | 809.95   | 665.36   | 507.42   | 396.50   | 613.97   |
| TC1600000947.mm.1 |                     | 66.35    | 70.35    | 67.32    | 53.83    | 64.14    | 53.33    |
| TC1800001705.mm.1 |                     | 60.22    | 75.05    | 64.60    | 32.98    | 49.45    | 49.59    |
| TC0500002507.mm.1 | Gm15794; AC132284.1 | 35.73    | 28.22    | 33.24    | 26.05    | 27.30    | 24.30    |
| TC1600001536.mm.1 |                     | 30.96    | 27.01    | 23.83    | 19.44    | 21.64    | 22.48    |
| TC0200000787.mm.1 |                     | 72.60    | 114.21   | 96.96    | 55.08    | 48.67    | 70.09    |
| TC1200001753.mm.1 | Gm24305             | 46252.26 | 43916.71 | 43968.51 | 38720.02 | 25113.25 | 31319.15 |
| TC0500002834.mm.1 |                     | 268.31   | 206.38   | 189.50   | 122.77   | 175.47   | 137.38   |
| TC0100002239.mm.1 | Gm23722             | 380.33   | 483.39   | 480.52   | 356.40   | 280.24   | 347.36   |
| TC1900001327.mm.1 |                     | 29.99    | 47.96    | 36.59    | 19.83    | 25.05    | 26.55    |
| TC0300002508.mm.1 | Rnu1b1              | 17773.46 | 15095.19 | 17739.27 | 13261.57 | 8016.53  | 11528.38 |
| TC0600003303.mm.1 |                     | 25.80    | 24.47    | 27.66    | 23.10    | 19.18    | 16.64    |
| TC0100000842.mm.1 | Gm15371             | 30.44    | 23.11    | 26.37    | 22.43    | 18.58    | 17.26    |
| TC0400002329.mm.1 |                     | 4112.71  | 4149.27  | 3727.89  | 3416.45  | 2293.71  | 2909.11  |
| TC0600000488.mm.1 | Gm15550             | 18.84    | 18.60    | 19.54    | 16.85    | 12.45    | 15.20    |
| TC0100002453.mm.1 | Gm11605             | 3065.31  | 3234.34  | 2511.48  | 2353.45  | 1791.88  | 2243.14  |
| TC0400000606.mm.1 |                     | 16.27    | 15.82    | 12.51    | 10.71    | 12.35    | 9.85     |
| TC0X00002413.mm.1 | Gm14736             | 34.13    | 45.50    | 39.12    | 28.25    | 30.15    | 32.53    |
| TC0500002191.mm.1 | Mir3473e            | 35.63    | 36.43    | 37.82    | 25.34    | 16.99    | 28.99    |
| TC1100000207.mm.1 |                     | 56.27    | 70.59    | 65.68    | 45.58    | 42.45    | 55.54    |
| TC0200001665.mm.1 |                     | 147.50   | 179.70   | 122.71   | 106.97   | 88.73    | 112.37   |
| TC0300003078.mm.1 |                     | 296.62   | 331.22   | 316.01   | 230.85   | 243.04   | 290.11   |
| TC1100003213.mm.1 | Rps12-ps19          | 3412.50  | 2762.79  | 3391.51  | 2473.78  | 1679.64  | 2351.76  |
| TC1700002608.mm.1 |                     | 77.63    | 140.33   | 69.71    | 43.50    | 37.17    | 56.62    |
| TC1800001403.mm.1 |                     | 19.90    | 17.97    | 15.25    | 12.15    | 14.92    | 13.11    |
| TC1800000911.mm.1 | Gm22694             | 1902.52  | 2003.11  | 2444.18  | 1686.53  | 948.87   | 1237.02  |
| TC1500001959.mm.1 |                     | 46.48    | 63.83    | 61.28    | 41.99    | 44.73    | 39.50    |
| TC0200003612.mm.1 |                     | 24.46    | 30.47    | 28.51    | 20.39    | 24.09    | 18.61    |
| TC0200002259.mm.1 | Gm14148             | 53236.66 | 54215.78 | 56885.21 | 50069.88 | 37226.96 | 41656.10 |
| TC1200000707.mm.1 |                     | 46.27    | 47.32    | 36.70    | 28.57    | 35.76    | 24.14    |
| TC1500000223.mm.1 |                     | 23.65    | 25.14    | 22.64    | 18.27    | 17.88    | 22.09    |
| TC0200005093.mm.1 |                     | 46.37    | 56.22    | 41.37    | 38.54    | 34.04    | 36.43    |
| TC1000002724.mm.1 |                     | 35.81    | 36.91    | 32.04    | 31.59    | 28.16    | 25.83    |
| TC0300002026.mm.1 |                     | 21.80    | 28.44    | 21.86    | 15.14    | 19.90    | 13.98    |

|                   |                      |          |          |          |           |           |           |
|-------------------|----------------------|----------|----------|----------|-----------|-----------|-----------|
| TC1100002922.mm.1 |                      | 32.30    | 34.00    | 33.10    | 30.73     | 23.66     | 23.48     |
| TC100000360.mm.1  | Gm25526              | 40.82    | 46.79    | 60.68    | 34.11     | 34.17     | 36.62     |
| TC0200001718.mm.1 |                      | 207.22   | 219.11   | 165.84   | 141.01    | 131.93    | 164.34    |
| TC0900002178.mm.1 |                      | 136.37   | 142.02   | 154.38   | 102.52    | 91.23     | 128.91    |
| TC0900000740.mm.1 |                      | 33.73    | 44.17    | 33.59    | 22.31     | 29.57     | 27.01     |
| TC0500001490.mm.1 | Gm17131              | 5645.11  | 6763.68  | 8083.60  | 5139.32   | 2666.74   | 3667.66   |
| TC0900002628.mm.1 |                      | 39.19    | 33.19    | 41.76    | 29.80     | 23.00     | 30.53     |
| TC0300002280.mm.1 | Gm19382              | 27.19    | 39.82    | 32.14    | 22.34     | 21.83     | 25.70     |
| TC0X00000016.mm.1 | Gm15249; RP23-22L6.7 | 29.97    | 22.27    | 31.30    | 20.50     | 20.68     | 20.00     |
| TC1900000085.mm.1 | Gm19474              | 108.74   | 60.60    | 95.63    | 55.69     | 26.34     | 40.94     |
| TC1500000955.mm.1 | Gm22045              | 166.47   | 125.27   | 126.06   | 98.99     | 84.53     | 111.59    |
| TC0400003643.mm.1 |                      | 42.42    | 33.37    | 40.40    | 32.96     | 29.82     | 29.32     |
| TC1200000934.mm.1 |                      | 69.24    | 86.23    | 82.40    | 69.13     | 54.32     | 52.85     |
| TC1700002530.mm.1 |                      | 31.92    | 42.28    | 24.82    | 21.72     | 16.26     | 21.13     |
| TC0300002661.mm.1 |                      | 178.06   | 170.07   | 137.65   | 134.40    | 102.33    | 118.89    |
| TC1300001184.mm.1 |                      | 71.68    | 74.11    | 50.58    | 44.85     | 39.92     | 48.56     |
| TC1600001823.mm.1 |                      | 2094.16  | 2845.99  | 2507.75  | 2022.96   | 1247.59   | 1449.35   |
| TC1000002027.mm.1 |                      | 38.68    | 46.03    | 50.50    | 32.30     | 35.92     | 37.02     |
| TC1100003772.mm.1 | Gm27374              | 48.36    | 66.12    | 57.58    | 47.52     | 39.22     | 37.94     |
| TC0400001264.mm.1 | ZNFX1-AS1_2          | 12.43    | 15.25    | 14.67    | 9.90      | 12.01     | 11.45     |
| TC1500001161.mm.1 |                      | 2767.62  | 3132.71  | 2737.15  | 2542.75   | 1704.27   | 1884.66   |
| TC0600002907.mm.1 |                      | 25.59    | 29.23    | 28.41    | 19.52     | 21.15     | 25.20     |
| TC0200003102.mm.1 |                      | 275.46   | 377.45   | 306.97   | 265.22    | 200.09    | 196.72    |
| TC1100004258.mm.1 | Gm12587              | 1993.14  | 1972.36  | 1791.59  | 1724.90   | 1210.28   | 1341.65   |
| TC0900002412.mm.1 |                      | 55.12    | 58.26    | 53.33    | 36.53     | 38.24     | 50.73     |
| TC0200001682.mm.1 |                      | 504.48   | 542.19   | 604.28   | 483.61    | 329.61    | 337.24    |
| TC0900002265.mm.1 |                      | 297.67   | 312.23   | 455.05   | 265.41    | 190.72    | 164.31    |
| TC1200000954.mm.1 |                      | 3805.79  | 4602.16  | 4594.76  | 3692.72   | 2923.72   | 2469.96   |
| TC0900000038.mm.1 |                      | 13.12    | 10.60    | 11.58    | 10.36     | 9.03      | 8.59      |
| TC0800003101.mm.1 |                      | 1174.21  | 846.30   | 730.33   | 388492.10 | 229250.90 | 288281.60 |
| TC1700001619.mm.1 | Atp6v0c; Atp6v0c-ps2 | 4893.44  | 4802.17  | 4837.52  | 6486.43   | 6666.33   | 6379.08   |
| TC0X00001712.mm.1 |                      | 19.26    | 18.90    | 19.43    | 27.94     | 27.31     | 28.89     |
| TC0900000702.mm.1 | Gm6166               | 51872.00 | 50382.66 | 59099.32 | 164500.50 | 176247.60 | 186346.70 |
| TC1200000195.mm.1 |                      | 32704.27 | 33213.34 | 32810.89 | 48157.16  | 46281.32  | 49398.98  |
| TC1800001587.mm.1 | Gm14328              | 13606.86 | 12524.10 | 15199.70 | 50762.23  | 44599.04  | 47182.83  |
| TC0200004759.mm.1 | Snord17              | 633.09   | 647.68   | 652.68   | 1003.22   | 953.17    | 927.44    |
| TC1600001433.mm.1 | Gm20328              | 8.52     | 8.86     | 9.12     | 12.06     | 12.07     | 12.23     |
| TC0800002027.mm.1 | Gm6100               | 357.26   | 325.43   | 386.10   | 1071.80   | 959.81    | 1142.02   |
| TC0700002138.mm.1 | Gm15930              | 1387.53  | 1304.56  | 1168.88  | 3224.67   | 2912.66   | 3195.91   |
| TC0900000541.mm.1 | Fxyd2                | 62.25    | 59.00    | 52.94    | 350.91    | 253.32    | 269.87    |
| TC0800000516.mm.1 | Sorbs2               | 22.36    | 23.44    | 24.34    | 47.05     | 42.74     | 41.69     |
| TC1800000050.mm.1 | Fabp5l2              | 990.99   | 913.20   | 981.53   | 3693.21   | 2821.49   | 3546.01   |
| TC0100000198.mm.1 | Gm19680              | 157.05   | 149.39   | 152.67   | 248.17    | 280.61    | 254.44    |
| TC0200000042.mm.1 |                      | 442.41   | 410.83   | 463.32   | 1000.37   | 1046.78   | 1225.79   |
| TC0200004450.mm.1 | Gm13998              | 1314.49  | 1264.02  | 1514.41  | 5896.32   | 4304.70   | 5064.74   |
| TC0700000689.mm.1 |                      | 15.32    | 15.33    | 14.09    | 26.18     | 25.10     | 23.47     |
| TC1100001243.mm.1 | Al662270             | 205.12   | 209.16   | 192.08   | 330.24    | 302.99    | 309.13    |
| TC0700000688.mm.1 |                      | 26.35    | 28.43    | 28.12    | 36.43     | 36.63     | 37.09     |
| TC0800000968.mm.1 | Syce2                | 206.68   | 214.14   | 210.88   | 282.75    | 282.41    | 265.04    |
| TC0200000372.mm.1 | Gm13392              | 1322.65  | 1237.00  | 1153.86  | 2459.46   | 2186.14   | 2482.81   |
| TC0300001634.mm.1 | LOC100862399         | 1496.92  | 1496.80  | 1184.78  | 6948.25   | 5316.00   | 7830.62   |
| TC0700002140.mm.1 | Gm10693              | 177.93   | 182.38   | 177.41   | 381.90    | 312.67    | 348.14    |
| TC1100002047.mm.1 | Gm11771              | 184.91   | 157.88   | 184.55   | 515.29    | 441.45    | 405.98    |
| TC1900001474.mm.1 | Gm23800              | 46.43    | 45.97    | 45.41    | 62.53     | 70.18     | 65.48     |
| TC0800000551.mm.1 |                      | 13.37    | 12.16    | 12.28    | 17.10     | 17.59     | 17.29     |
| TC0700001714.mm.1 | Gm5601               | 25783.67 | 25540.90 | 23698.29 | 35047.69  | 34974.55  | 37602.91  |
| TC0700002139.mm.1 | Gm15925              | 2273.93  | 2315.05  | 2063.52  | 4226.00   | 3830.20   | 4602.65   |
| TC0900000680.mm.1 | Peak1os              | 3141.93  | 3137.01  | 3411.30  | 4729.64   | 5236.37   | 4785.21   |
| TC1700001552.mm.1 | Vmn1r-ps149          | 13.48    | 13.55    | 14.41    | 18.66     | 20.04     | 20.64     |
| TC0500000010.mm.1 |                      | 955.03   | 826.46   | 820.13   | 1578.53   | 1455.21   | 1631.39   |
| TC0900001684.mm.1 |                      | 15.64    | 14.70    | 14.33    | 19.27     | 19.71     | 20.25     |
| TC1800001540.mm.1 |                      | 13.56    | 13.30    | 14.37    | 18.36     | 18.74     | 17.58     |
| TC1500000310.mm.1 |                      | 9.68     | 9.15     | 9.32     | 12.92     | 11.89     | 12.30     |
| TC1100000683.mm.1 |                      | 46.43    | 42.73    | 42.87    | 71.85     | 63.51     | 66.15     |
| TC1400001972.mm.1 | Gm3601               | 37362.92 | 41103.34 | 38706.03 | 124430.60 | 89982.30  | 94939.79  |
| TC0900001596.mm.1 | Gm24044              | 190.57   | 179.99   | 184.97   | 240.59    | 265.99    | 261.12    |
| TC0100003549.mm.1 | Ly9                  | 758.72   | 716.81   | 674.26   | 1805.03   | 1398.47   | 1803.03   |
| TC0300000056.mm.1 | C030034L19Rik        | 20.19    | 21.12    | 21.21    | 43.11     | 34.44     | 37.65     |
| TC0100000928.mm.1 |                      | 19.21    | 19.58    | 19.00    | 24.19     | 26.73     | 26.40     |
| TC1500000192.mm.1 |                      | 11.75    | 10.78    | 10.91    | 14.61     | 15.83     | 15.24     |
| TC0700004005.mm.1 |                      | 92.93    | 123.97   | 89.05    | 313.10    | 258.81    | 313.36    |
| TC1100001258.mm.1 |                      | 95.49    | 83.93    | 94.46    | 211.48    | 165.47    | 197.48    |
| TC0600003220.mm.1 | Gm15987; Mir7649     | 19.70    | 21.79    | 18.25    | 55.41     | 41.21     | 46.13     |
| TC0900000119.mm.1 | Gm24357              | 19445.70 | 20911.98 | 21853.33 | 30123.92  | 30732.44  | 28329.87  |
| TC0100003438.mm.1 | Gm16550              | 499.77   | 501.37   | 454.12   | 662.63    | 640.45    | 674.02    |
| TC1600000747.mm.1 |                      | 93.04    | 119.67   | 97.02    | 310.57    | 233.76    | 290.28    |
| TC1100002845.mm.1 | 2610507I01Rik        | 68.34    | 67.67    | 67.18    | 84.08     | 93.19     | 92.07     |
| TC1900000104.mm.1 | Gm5510               | 1420.32  | 1283.92  | 1226.83  | 1932.73   | 1861.59   | 1926.84   |
| TC1200001701.mm.1 | Gm25015              | 15.46    | 14.28    | 14.16    | 21.45     | 20.66     | 19.40     |
| TC1700000342.mm.1 | Rab26os              | 136.23   | 116.27   | 132.42   | 190.42    | 191.50    | 192.81    |

|                                  |                                   |           |           |           |           |           |           |
|----------------------------------|-----------------------------------|-----------|-----------|-----------|-----------|-----------|-----------|
| TC1400001677.mm.1                |                                   | 34.91     | 36.09     | 40.27     | 54.03     | 54.37     | 51.95     |
| TC0200001411.mm.1                | Pex16                             | 161.39    | 156.31    | 159.01    | 197.66    | 219.88    | 218.51    |
| TC0300001021.mm.1                |                                   | 11.35     | 12.16     | 12.75     | 15.76     | 16.58     | 16.28     |
| TC1100001807.mm.1                | Gm23120                           | 13.03     | 14.07     | 12.98     | 16.69     | 17.59     | 17.91     |
| TC0700000181.mm.1                | Gm26056                           | 52.45     | 52.23     | 50.22     | 70.51     | 63.59     | 68.93     |
| TC0200000384.mm.1                |                                   | 18.80     | 17.88     | 19.35     | 36.12     | 30.61     | 40.00     |
| TC0X00000918.mm.1                | Mir223; F630028O10Rik             | 2782.35   | 2655.46   | 2637.45   | 4387.56   | 3711.45   | 3943.63   |
| TC1100003657.mm.1                | Snora21                           | 3421.65   | 3377.55   | 3439.05   | 5486.11   | 4602.89   | 5197.70   |
| TC1100002951.mm.1                | Tvp23bos; RP23-428I5.4            | 42.90     | 40.40     | 40.92     | 55.77     | 58.32     | 52.00     |
| TC0500003396.mm.1                |                                   | 79.79     | 88.32     | 73.66     | 121.91    | 124.93    | 118.49    |
| TC0600001444.mm.1                |                                   | 78.22     | 83.09     | 93.95     | 178.88    | 143.56    | 174.68    |
| TC0X00000732.mm.1                | Xlr4e-ps                          | 68.12     | 54.51     | 66.30     | 113.29    | 110.72    | 128.06    |
| TC0600003101.mm.1                |                                   | 161.38    | 144.90    | 142.72    | 217.78    | 257.65    | 244.20    |
| TC0800000849.mm.1                | Gm7984                            | 7806.11   | 7398.12   | 6774.65   | 11979.66  | 11561.53  | 14016.50  |
| TC1200002225.mm.1                |                                   | 701.93    | 694.95    | 658.15    | 910.83    | 1019.87   | 904.21    |
| TC1800000540.mm.1                |                                   | 9.08      | 8.16      | 8.47      | 12.36     | 11.65     | 11.16     |
| TC0500001882.mm.1                |                                   | 18.66     | 18.65     | 16.57     | 23.88     | 25.48     | 24.40     |
| TC0X00002904.mm.1                | Gm14910                           | 7.78      | 9.00      | 8.15      | 12.28     | 12.38     | 14.15     |
| TC0300002335.mm.1                | Gm22935                           | 379.85    | 391.01    | 366.42    | 555.22    | 606.24    | 700.16    |
| TC1300000238.mm.1                | Gm11333                           | 9.16      | 9.22      | 8.18      | 13.27     | 15.49     | 13.13     |
| TC0800002726.mm.1                |                                   | 15.73     | 15.25     | 15.84     | 21.59     | 21.40     | 25.18     |
| TC0200000381.mm.1                | Gm13411; RP23-218B17.1            | 16.41     | 19.17     | 24.18     | 41.82     | 47.01     | 43.75     |
| TC0400001713.mm.1                | LOC100862140                      | 15.16     | 14.50     | 18.41     | 33.44     | 47.10     | 49.63     |
| TC1000000958.mm.1                |                                   | 7.06      | 8.95      | 8.79      | 41.73     | 24.60     | 25.20     |
| TC1100003004.mm.1                | LOC100861608                      | 28.39     | 30.21     | 34.87     | 64.09     | 55.28     | 75.02     |
| TC0800001708.mm.1                |                                   | 92.11     | 89.75     | 83.84     | 124.34    | 117.32    | 136.28    |
| TC0800002358.mm.1                | LOC100861650                      | 146.02    | 130.46    | 150.29    | 232.90    | 205.50    | 204.45    |
| TC0200000458.mm.1                | Gm23969                           | 504.43    | 411.50    | 506.17    | 863.52    | 939.36    | 772.51    |
| TC1_GL456210_random00000005.mm.1 |                                   | 2163.72   | 2256.30   | 1984.80   | 4079.34   | 4995.53   | 3623.38   |
| TC1_GL456211_random00000005.mm.1 |                                   | 2163.72   | 2256.30   | 1984.80   | 4079.34   | 4995.53   | 3623.38   |
| TC1_GL456211_random00000026.mm.1 |                                   | 2163.72   | 2256.30   | 1984.80   | 4079.34   | 4995.53   | 3623.38   |
| TC1_GL456221_random00000004.mm.1 |                                   | 2163.72   | 2256.30   | 1984.80   | 4079.34   | 4995.53   | 3623.38   |
| TC0X00000876.mm.1                | Gm6982                            | 10.94     | 11.21     | 11.19     | 16.54     | 14.14     | 14.93     |
| TC1700002700.mm.1                |                                   | 1855.13   | 1602.98   | 1628.98   | 2852.69   | 2425.46   | 2809.69   |
| TC1300001451.mm.1                | Gpr137b-ps                        | 7063.67   | 7214.32   | 6674.93   | 10309.25  | 9038.55   | 10577.06  |
| TC0400002833.mm.1                | Tcp1-ps1                          | 16.98     | 15.87     | 17.15     | 23.01     | 23.60     | 20.81     |
| TC0700000398.mm.1                |                                   | 41.82     | 52.33     | 52.48     | 89.07     | 89.64     | 78.64     |
| TC0100000217.mm.1                |                                   | 24.16     | 28.92     | 26.67     | 38.46     | 39.49     | 43.63     |
| TC0800001796.mm.1                | Gm17149                           | 6210.57   | 6208.72   | 6502.82   | 12221.11  | 9447.74   | 10115.94  |
| TC0400003274.mm.1                |                                   | 16.08     | 15.54     | 17.76     | 21.56     | 21.70     | 21.01     |
| TC1400002727.mm.1                |                                   | 10.72     | 10.57     | 11.59     | 14.73     | 13.47     | 13.96     |
| TC0900002295.mm.1                |                                   | 367.76    | 411.04    | 392.92    | 524.85    | 534.21    | 604.03    |
| TC1300002716.mm.1                |                                   | 21.49     | 22.08     | 23.28     | 31.68     | 29.21     | 27.83     |
| TC0300000692.mm.1                |                                   | 17567.21  | 14375.95  | 13361.74  | 26150.00  | 24708.37  | 25465.87  |
| TC1600000210.mm.1                |                                   | 17567.21  | 14375.95  | 13361.74  | 26150.00  | 24708.37  | 25465.87  |
| TC0400003729.mm.1                | Gm13131                           | 185.19    | 190.11    | 180.87    | 251.72    | 222.32    | 246.38    |
| TC0300000108.mm.1                |                                   | 13.03     | 11.45     | 11.91     | 15.63     | 17.28     | 17.46     |
| TC1600001492.mm.1                | 0610012G03Rik                     | 287.28    | 290.74    | 303.87    | 463.82    | 391.68    | 484.75    |
| TC0M00000028.mm.1                | mt-Te                             | 205319.40 | 214993.60 | 188787.00 | 307172.40 | 284762.20 | 350021.90 |
| TC0800001108.mm.1                | Ap3s1-ps2                         | 4216.93   | 3435.34   | 3858.82   | 7420.41   | 5958.08   | 6321.36   |
| TC0800002356.mm.1                | LOC100861638                      | 13.11     | 15.60     | 16.51     | 52.09     | 39.17     | 31.39     |
| TC0400003266.mm.1                | Ttc39aos1; RP23-110H24.2; Gm12750 | 51.25     | 56.24     | 57.86     | 78.20     | 70.81     | 81.12     |
| TC0400002845.mm.1                | Gm11223                           | 2419.89   | 2682.02   | 2358.79   | 3946.38   | 3632.38   | 4631.45   |
| TC1600002002.mm.1                |                                   | 7.64      | 8.18      | 7.64      | 9.66      | 10.72     | 11.20     |
| TC0X00002725.mm.1                | Gm14845                           | 1509.42   | 1514.03   | 1310.61   | 2059.60   | 2573.89   | 2350.42   |
| TC0200004207.mm.1                | Ldlrad3                           | 95.68     | 82.99     | 92.62     | 141.89    | 122.22    | 127.27    |
| TC0100002686.mm.1                |                                   | 9.01      | 10.28     | 9.42      | 12.48     | 13.57     | 12.31     |
| TC0600000516.mm.1                |                                   | 9.86      | 9.85      | 10.41     | 13.62     | 14.28     | 12.26     |
| TC1800000664.mm.1                | Gm23016                           | 12.96     | 13.31     | 11.21     | 16.76     | 17.56     | 17.22     |
| TC0500003475.mm.1                |                                   | 27.20     | 30.98     | 23.99     | 48.56     | 41.44     | 45.81     |
| TC1400000123.mm.1                |                                   | 13.78     | 15.50     | 14.67     | 19.06     | 19.88     | 17.96     |
| TC0X00000362.mm.1                | Zfp36l1-ps                        | 939.06    | 905.71    | 785.98    | 1420.57   | 1223.77   | 1284.62   |
| TC0200004918.mm.1                |                                   | 221.73    | 247.38    | 219.94    | 284.09    | 289.55    | 301.38    |
| TC1300001730.mm.1                | Gm23206                           | 14.66     | 13.61     | 15.90     | 19.35     | 18.82     | 20.11     |
| TC0X00003379.mm.1                | G530011O06Rik                     | 108.11    | 94.43     | 78.89     | 187.02    | 161.07    | 213.58    |
| TC1600002178.mm.1                | Litaf; Gm19955                    | 202.63    | 202.56    | 211.11    | 272.89    | 255.72    | 305.13    |
| TC0600001941.mm.1                |                                   | 11.30     | 11.17     | 12.47     | 14.91     | 16.88     | 15.12     |
| TC0400001078.mm.1                |                                   | 11.42     | 11.11     | 11.10     | 15.98     | 15.27     | 13.52     |
| TC0600000361.mm.1                | Gm15487; Atp6v0c                  | 109645.50 | 99959.00  | 90721.95  | 134784.60 | 134621.30 | 136959.80 |
| TC0200003773.mm.1                | Mrpl23-ps1                        | 3843.54   | 2834.76   | 3087.97   | 6076.32   | 5171.36   | 6009.35   |
| TC0X00000759.mm.1                | Gm14709                           | 9.25      | 10.37     | 10.02     | 12.72     | 13.97     | 15.29     |
| TC0400002543.mm.1                | Olfir29-ps1                       | 16.73     | 16.16     | 17.63     | 23.71     | 23.96     | 20.58     |
| TC1000001670.mm.1                | Gm16149                           | 101.00    | 90.68     | 92.05     | 136.42    | 122.03    | 119.56    |
| TC1400002674.mm.1                | Gm17366                           | 38.46     | 38.74     | 30.35     | 71.30     | 86.44     | 60.54     |
| TC0200005075.mm.1                |                                   | 8.31      | 8.40      | 8.09      | 10.18     | 12.43     | 11.56     |

|                                  |                       |           |           |           |           |           |           |
|----------------------------------|-----------------------|-----------|-----------|-----------|-----------|-----------|-----------|
| TC0500003276.mm.1                |                       | 344.99    | 310.79    | 236.85    | 644.75    | 543.18    | 752.35    |
| TC0X00001214.mm.1                |                       | 17.05     | 14.40     | 16.93     | 22.13     | 21.92     | 24.51     |
| TC0X00002732.mm.1                | Gm25828               | 14.74     | 17.09     | 17.50     | 23.81     | 23.02     | 21.48     |
| TC1800001301.mm.1                | Mospd4                | 29.19     | 26.09     | 28.11     | 37.89     | 40.16     | 34.32     |
| TC1000001874.mm.1                |                       | 5.88      | 5.91      | 6.24      | 8.54      | 11.23     | 8.92      |
| TC0200001512.mm.1                |                       | 10.67     | 10.01     | 10.13     | 12.96     | 16.11     | 14.63     |
| TC0200000046.mm.1                |                       | 169.33    | 213.72    | 217.39    | 337.05    | 298.11    | 312.02    |
| TC0500000297.mm.1                | Slc35f6; Mir5625      | 4846.93   | 4969.65   | 3863.35   | 6856.84   | 6770.08   | 7208.42   |
| TC1700002823.mm.1                | H2-T10                | 363.15    | 334.92    | 327.83    | 522.67    | 465.72    | 611.29    |
| TC0100000730.mm.1                |                       | 56.81     | 57.60     | 49.78     | 84.42     | 100.74    | 123.95    |
| TC0100000739.mm.1                |                       | 56.81     | 57.60     | 49.78     | 84.42     | 100.74    | 123.95    |
| TC0100000748.mm.1                |                       | 56.81     | 57.60     | 49.78     | 84.42     | 100.74    | 123.95    |
| TC0100000753.mm.1                |                       | 56.81     | 57.60     | 49.78     | 84.42     | 100.74    | 123.95    |
| TC0100002706.mm.1                |                       | 56.81     | 57.60     | 49.78     | 84.42     | 100.74    | 123.95    |
| TC0500003459.mm.1                |                       | 56.81     | 57.60     | 49.78     | 84.42     | 100.74    | 123.95    |
| TC1_GL456211_random00000012.mm.1 |                       | 56.81     | 57.60     | 49.78     | 84.42     | 100.74    | 123.95    |
| TC1_GL456211_random00000017.mm.1 |                       | 56.81     | 57.60     | 49.78     | 84.42     | 100.74    | 123.95    |
| TC1_GL456212_random00000002.mm.1 |                       | 56.81     | 57.60     | 49.78     | 84.42     | 100.74    | 123.95    |
| TC1_GL456212_random00000012.mm.1 |                       | 56.81     | 57.60     | 49.78     | 84.42     | 100.74    | 123.95    |
| TC1_GL456221_random00000006.mm.1 |                       | 56.81     | 57.60     | 49.78     | 84.42     | 100.74    | 123.95    |
| TC1_GL456221_random00000023.mm.1 |                       | 56.81     | 57.60     | 49.78     | 84.42     | 100.74    | 123.95    |
| TC0700003304.mm.1                | Gm22776               | 17.20     | 17.44     | 16.21     | 23.97     | 25.10     | 20.78     |
| TC0700000117.mm.1                |                       | 12.72     | 13.84     | 13.21     | 17.88     | 17.90     | 15.69     |
| TC0100000134.mm.1                |                       | 10.52     | 11.31     | 11.83     | 13.91     | 16.41     | 15.05     |
| TC0700002991.mm.1                | Snord35b              | 224.54    | 207.13    | 205.39    | 273.96    | 298.00    | 343.01    |
| TC0300001635.mm.1                |                       | 28.70     | 30.72     | 33.32     | 50.46     | 42.65     | 57.19     |
| TC1300002669.mm.1                | Gm9025                | 411.43    | 423.84    | 351.92    | 549.10    | 560.12    | 650.98    |
| TC0900000650.mm.1                | LOC100862116          | 8.54      | 10.24     | 9.79      | 12.64     | 13.38     | 12.33     |
| TC0500002152.mm.1                | Tyms                  | 277.73    | 283.58    | 250.24    | 372.77    | 338.10    | 402.46    |
| TC0X00001034.mm.1                | FTX_1                 | 20.39     | 21.62     | 20.29     | 26.00     | 31.75     | 27.49     |
| TC0700001965.mm.1                |                       | 15.31     | 15.90     | 15.49     | 20.45     | 26.56     | 22.12     |
| TC0300002825.mm.1                |                       | 10.18     | 10.18     | 9.59      | 11.98     | 14.42     | 13.44     |
| TC0300002235.mm.1                | Gm26771               | 13.36     | 16.26     | 19.04     | 25.56     | 27.95     | 27.51     |
| TC1500002015.mm.1                |                       | 151.57    | 164.27    | 139.57    | 201.09    | 196.77    | 227.53    |
| TC0600001838.mm.1                |                       | 11.33     | 10.90     | 11.86     | 15.69     | 15.49     | 13.44     |
| TC0600002407.mm.1                |                       | 14.57     | 14.18     | 14.68     | 19.01     | 19.02     | 16.57     |
| TC0500001919.mm.1                |                       | 9.15      | 11.87     | 9.44      | 14.73     | 16.65     | 15.23     |
| TC0700003078.mm.1                |                       | 239.35    | 248.32    | 226.30    | 440.30    | 345.66    | 332.00    |
| TC1900000690.mm.1                |                       | 118.79    | 108.58    | 102.16    | 172.69    | 142.36    | 150.74    |
| TC0700003637.mm.1                |                       | 8.73      | 10.23     | 9.88      | 13.99     | 12.07     | 13.08     |
| TC1000003133.mm.1                | Gm26847               | 22.72     | 21.00     | 21.48     | 33.64     | 37.29     | 28.05     |
| TC1800000519.mm.1                |                       | 9.16      | 9.38      | 9.32      | 12.42     | 10.65     | 12.23     |
| TC0300003172.mm.1                | Gm24494               | 285486.70 | 279650.20 | 304004.60 | 362382.90 | 447588.80 | 388293.90 |
| TC0300000257.mm.1                | Gm25696               | 42.46     | 35.58     | 41.71     | 71.87     | 55.71     | 60.04     |
| TC0X00002304.mm.1                | Gm5637                | 36117.64  | 29206.63  | 29641.94  | 46164.41  | 43010.06  | 43657.17  |
| TC0600001523.mm.1                |                       | 13.65     | 14.20     | 11.74     | 19.05     | 18.81     | 23.46     |
| TC0X00002916.mm.1                | Gm5648                | 48.76     | 40.69     | 44.26     | 58.26     | 57.23     | 63.93     |
| TC1500000507.mm.1                |                       | 10.96     | 12.61     | 12.46     | 16.36     | 19.99     | 16.39     |
| TC0X00001470.mm.1                | Gm15113               | 7.32      | 7.46      | 7.71      | 8.88      | 10.45     | 10.70     |
| TC0200000327.mm.1                | Gm23970               | 84.11     | 75.36     | 61.39     | 110.32    | 113.87    | 124.23    |
| TC0X00000526.mm.1                | Gm23258               | 7.51      | 7.93      | 7.71      | 10.19     | 14.11     | 13.36     |
| TC0600003221.mm.1                |                       | 9.71      | 9.23      | 10.32     | 14.57     | 15.47     | 12.21     |
| TC0400002333.mm.1                | Gng2-ps1              | 1433.28   | 1268.60   | 1260.48   | 1674.28   | 1709.80   | 1952.15   |
| TC0800002751.mm.1                | Gm26493               | 266.71    | 263.41    | 272.95    | 601.63    | 386.49    | 494.95    |
| TC0X00000607.mm.1                | Gm6806                | 9.25      | 10.59     | 8.87      | 13.16     | 12.03     | 13.66     |
| TC1700001711.mm.1                | Cuta                  | 15723.01  | 16488.84  | 15153.49  | 23287.50  | 19126.78  | 20901.48  |
| TC0600002384.mm.1                |                       | 84.20     | 107.40    | 62.22     | 197.83    | 160.04    | 205.84    |
| TC0300002108.mm.1                |                       | 18.67     | 18.21     | 21.14     | 23.57     | 25.02     | 26.13     |
| TC0600001230.mm.1                |                       | 13.26     | 13.19     | 12.45     | 23.03     | 18.38     | 17.39     |
| TC1100000292.mm.1                | Gm23109               | 12.94     | 10.17     | 12.44     | 18.25     | 16.56     | 16.61     |
| TC0200001533.mm.1                | LOC100862111          | 184.89    | 205.28    | 149.64    | 318.22    | 263.02    | 304.04    |
| TC0700000119.mm.1                | Vmn1r-ps54            | 8.21      | 8.89      | 9.72      | 13.22     | 11.26     | 12.00     |
| TC1700002744.mm.1                |                       | 10.77     | 11.20     | 12.48     | 13.81     | 15.36     | 14.95     |
| TC0800002151.mm.1                | Gm25309               | 12.20     | 14.47     | 15.85     | 19.96     | 21.00     | 19.62     |
| TC0800002291.mm.1                |                       | 11.01     | 10.90     | 11.55     | 13.90     | 15.60     | 17.94     |
| TC0200001783.mm.1                |                       | 26.40     | 21.59     | 21.76     | 39.49     | 35.64     | 31.37     |
| TC0200000488.mm.1                | Gm22675               | 16.85     | 15.60     | 16.26     | 22.85     | 19.07     | 21.31     |
| TC0X00003267.mm.1                | Gm15190               | 3331.58   | 3268.90   | 3482.94   | 4663.87   | 3980.31   | 4870.15   |
| TC0600000766.mm.1                |                       | 23.04     | 20.07     | 26.33     | 33.44     | 32.00     | 33.27     |
| TC0100002938.mm.1                | 2900060B14Rik         | 214.89    | 205.30    | 222.71    | 299.44    | 251.13    | 290.64    |
| TC0900002019.mm.1                | Gm6762                | 36.77     | 35.94     | 39.72     | 70.46     | 61.24     | 49.90     |
| TC0X00002097.mm.1                |                       | 14.17     | 13.33     | 10.84     | 18.55     | 17.84     | 18.68     |
| TC0200003432.mm.1                | Gm13496; RP23-244N6.7 | 8.41      | 7.75      | 8.48      | 11.10     | 9.62      | 11.26     |
| TC0700003282.mm.1                | Gm23767               | 19.36     | 16.64     | 18.19     | 37.62     | 31.24     | 25.40     |

|                                  |                        |          |          |          |           |          |          |
|----------------------------------|------------------------|----------|----------|----------|-----------|----------|----------|
| TC1200002637.mm.1                |                        | 10.55    | 11.31    | 12.03    | 14.76     | 13.31    | 15.11    |
| TC0600001184.mm.1                |                        | 9.65     | 10.02    | 9.92     | 13.15     | 12.41    | 15.83    |
| TC0200000621.mm.1                |                        | 198.56   | 153.78   | 168.92   | 302.37    | 248.20   | 252.11   |
| TC1200000511.mm.1                |                        | 17.02    | 13.71    | 13.76    | 20.31     | 21.58    | 19.85    |
| TC0500000514.mm.1                |                        | 8.92     | 10.22    | 8.34     | 11.99     | 11.72    | 11.90    |
| TC1700000317.mm.1                |                        | 19.04    | 19.69    | 18.94    | 21.72     | 25.08    | 25.20    |
| TC1200001538.mm.1                | LOC100861907           | 22.41    | 20.90    | 16.89    | 29.78     | 30.74    | 27.93    |
| TC0700004450.mm.1                | 5830432E09Rik          | 47.20    | 50.33    | 40.56    | 59.82     | 60.97    | 65.36    |
| TC1300000909.mm.1                |                        | 15.05    | 16.36    | 16.47    | 21.02     | 27.19    | 21.71    |
| TC1800001247.mm.1                |                        | 7.82     | 9.62     | 8.97     | 11.63     | 12.15    | 11.16    |
| TC0500000199.mm.1                | 2700038G22Rik          | 97.51    | 98.51    | 84.17    | 129.54    | 136.37   | 173.06   |
| TC0600000510.mm.1                |                        | 10.60    | 11.18    | 9.19     | 13.13     | 15.47    | 16.05    |
| TC0700002225.mm.1                |                        | 18.81    | 19.76    | 21.05    | 23.92     | 29.25    | 26.41    |
| TC0100001940.mm.1                |                        | 9.96     | 9.41     | 11.33    | 13.71     | 12.63    | 13.23    |
| TC0X00000401.mm.1                | Gm14619                | 10.41    | 10.17    | 13.24    | 18.04     | 20.72    | 15.98    |
| TC1100001783.mm.1                | Snord104               | 1559.98  | 1409.30  | 1195.83  | 2705.69   | 2180.28  | 2012.27  |
| TC1300001598.mm.1                | Vmn1r-ps111            | 20.01    | 18.51    | 23.25    | 27.35     | 27.32    | 27.14    |
| TC0X00002058.mm.1                | Snora69                | 832.57   | 920.96   | 873.92   | 1085.92   | 1381.83  | 1429.96  |
| TC0X00000673.mm.1                | Gm20455; RP23-11C16.11 | 18.07    | 15.49    | 15.95    | 21.17     | 21.62    | 19.69    |
| TC0400002283.mm.1                |                        | 10.03    | 7.74     | 8.60     | 12.64     | 12.43    | 11.64    |
| TC1000001806.mm.1                |                        | 12.08    | 12.77    | 12.56    | 14.61     | 16.78    | 18.17    |
| TC0300001721.mm.1                |                        | 13.51    | 12.71    | 15.09    | 18.49     | 20.93    | 17.29    |
| TC0700003638.mm.1                |                        | 8.29     | 7.97     | 8.85     | 9.60      | 11.06    | 10.77    |
| TC1500001924.mm.1                |                        | 40.97    | 39.38    | 36.40    | 70.25     | 50.17    | 66.31    |
| TC1100003552.mm.1                |                        | 8.75     | 9.94     | 9.10     | 12.35     | 12.02    | 15.21    |
| TC1700002295.mm.1                |                        | 10.87    | 11.89    | 11.68    | 14.61     | 20.44    | 18.44    |
| TC0400003819.mm.1                |                        | 10.37    | 12.30    | 11.68    | 16.23     | 15.67    | 13.90    |
| TC1800000069.mm.1                | Gm10554                | 108.08   | 79.41    | 81.94    | 192.59    | 132.85   | 176.64   |
| TC0100000078.mm.1                |                        | 15.93    | 18.19    | 15.38    | 22.28     | 21.30    | 26.36    |
| TC1300001485.mm.1                |                        | 8.23     | 9.21     | 10.14    | 12.34     | 11.42    | 12.62    |
| TC1600000616.mm.1                |                        | 9.67     | 11.57    | 10.00    | 14.26     | 19.12    | 15.11    |
| TC1100003060.mm.1                | Gm12307                | 13.18    | 12.28    | 13.81    | 16.05     | 20.61    | 18.15    |
| TC1200002303.mm.1                | Scarna13; Mir3069      | 81.37    | 82.70    | 77.20    | 117.46    | 120.97   | 95.39    |
| TC0200004891.mm.1                |                        | 9.79     | 10.03    | 10.88    | 13.40     | 13.65    | 11.76    |
| TC0100001387.mm.1                | Glul; Mir8114          | 266.20   | 239.03   | 227.90   | 314.51    | 291.23   | 333.75   |
| TC0100002724.mm.1                |                        | 27.89    | 33.89    | 30.18    | 40.71     | 43.70    | 53.03    |
| TC0200002581.mm.1                | Gm23201                | 107.21   | 91.95    | 97.70    | 217.64    | 151.53   | 148.29   |
| TC1300002266.mm.1                |                        | 14.68    | 16.89    | 14.70    | 21.00     | 19.32    | 24.21    |
| TC0600000767.mm.1                | Gm15490                | 26.05    | 34.48    | 25.58    | 43.22     | 44.47    | 40.62    |
| TC0500000771.mm.1                |                        | 7.18     | 7.67     | 7.23     | 9.51      | 8.38     | 10.03    |
| TC1100001976.mm.1                | Gm11726                | 11.36    | 13.18    | 11.91    | 16.81     | 21.92    | 16.53    |
| TC1600001541.mm.1                | LOC100862381           | 16.32    | 16.81    | 15.52    | 19.93     | 26.51    | 26.68    |
| TC1500001100.mm.1                | Gm24128                | 15.76    | 17.03    | 12.81    | 22.23     | 23.54    | 20.47    |
| TC0X00000164.mm.1                | Rpl3-ps1               | 873.60   | 887.88   | 736.73   | 1023.39   | 1169.92  | 1172.90  |
| TC0400000101.mm.1                |                        | 7.25     | 8.09     | 8.51     | 9.37      | 10.46    | 10.53    |
| TC0100001213.mm.1                | Gm15851; AC157924.3    | 20.71    | 28.40    | 26.09    | 67.30     | 43.09    | 43.25    |
| TC0X00002119.mm.1                |                        | 13.81    | 11.19    | 11.72    | 15.97     | 18.30    | 15.89    |
| TC1800000530.mm.1                |                        | 9.61     | 9.62     | 11.40    | 13.73     | 13.10    | 12.46    |
| TC0500003460.mm.1                | Gm15753                | 1299.48  | 1137.81  | 1095.96  | 1925.56   | 1581.54  | 1529.48  |
| TC0700001963.mm.1                |                        | 350.40   | 362.77   | 263.14   | 616.88    | 499.16   | 790.46   |
| TC1200001670.mm.1                |                        | 14.47    | 11.61    | 13.38    | 17.20     | 20.35    | 17.42    |
| TC0X00002137.mm.1                |                        | 11.23    | 10.49    | 11.31    | 13.53     | 16.12    | 18.49    |
| TC1100003507.mm.1                | Gm15698                | 46.54    | 53.92    | 47.59    | 64.93     | 62.19    | 77.55    |
| TC0100002816.mm.1                | Myeov2                 | 97.23    | 84.88    | 103.95   | 133.02    | 116.38   | 129.70   |
| TC1100002587.mm.1                | Gm12162; RP23-122N23.1 | 7.37     | 7.64     | 9.64     | 11.94     | 10.91    | 11.90    |
| TC1300002369.mm.1                |                        | 47.41    | 45.89    | 46.20    | 70.09     | 54.40    | 62.95    |
| TC0200000350.mm.1                | Gm13338                | 21.28    | 21.20    | 21.81    | 32.11     | 24.94    | 29.21    |
| TC0100002238.mm.1                | Snord89                | 70145.57 | 54093.96 | 70724.88 | 109667.50 | 96458.90 | 88599.85 |
| TC0600001641.mm.1                | Gm30332                | 10.57    | 10.38    | 11.34    | 14.80     | 14.25    | 12.28    |
| TC0500000958.mm.1                |                        | 25.05    | 25.04    | 28.07    | 31.46     | 38.24    | 32.93    |
| TC0400003363.mm.1                | Gm22980                | 179.04   | 137.56   | 176.00   | 461.05    | 311.37   | 262.69   |
| TC0400001884.mm.1                |                        | 15.20    | 14.44    | 13.99    | 33.88     | 25.85    | 20.17    |
| TC0700001078.mm.1                |                        | 28.17    | 23.53    | 24.38    | 34.16     | 38.08    | 31.18    |
| TC1900000353.mm.1                | Gm5514                 | 85.93    | 79.30    | 66.57    | 145.98    | 113.04   | 190.05   |
| TC0600000176.mm.1                |                        | 9.24     | 6.85     | 8.64     | 11.17     | 14.44    | 14.89    |
| TC1000000426.mm.1                | Gm27723                | 9.94     | 10.70    | 12.48    | 14.56     | 19.36    | 16.13    |
| TC0500000233.mm.1                | Gm22656                | 12.88    | 11.48    | 14.52    | 35.49     | 19.43    | 26.47    |
| TC0800000622.mm.1                |                        | 13.68    | 18.01    | 18.66    | 28.58     | 26.04    | 23.13    |
| TC1400000201.mm.1                |                        | 60.41    | 64.57    | 61.56    | 87.06     | 73.77    | 98.08    |
| TC0800001542.mm.1                | Mir1967                | 14.32    | 14.37    | 14.27    | 16.54     | 21.46    | 20.26    |
| TC1000001383.mm.1                |                        | 7.19     | 6.11     | 6.52     | 8.03      | 8.48     | 9.70     |
| TC1000002975.mm.1                |                        | 7.19     | 6.11     | 6.52     | 8.03      | 8.48     | 9.70     |
| TC0300001753.mm.1                |                        | 8.62     | 7.36     | 7.29     | 9.95      | 12.32    | 10.14    |
| TC0100000750.mm.1                |                        | 7.64     | 11.99    | 10.73    | 41.65     | 86.80    | 24.03    |
| TC1_GL456211_random00000016.mm.1 |                        | 7.64     | 11.99    | 10.73    | 41.65     | 86.80    | 24.03    |
| TC1_GL456212_random00000003.mm.1 |                        | 7.64     | 11.99    | 10.73    | 41.65     | 86.80    | 24.03    |
| TC1_GL456212_random00000010.mm.1 |                        | 7.64     | 11.99    | 10.73    | 41.65     | 86.80    | 24.03    |

|                                      |                       |          |          |          |          |          |          |
|--------------------------------------|-----------------------|----------|----------|----------|----------|----------|----------|
| TC1_GL456221_random000000<br>21.mm.1 |                       | 7.64     | 11.99    | 10.73    | 41.65    | 86.80    | 24.03    |
| TC1600000859.mm.1                    |                       | 7.90     | 9.34     | 8.23     | 11.15    | 12.17    | 10.17    |
| TC0300002771.mm.1                    | Gm26076               | 11.12    | 11.60    | 10.12    | 14.26    | 14.63    | 18.83    |
| TC0700001200.mm.1                    | Gm20077               | 23534.52 | 22069.84 | 19608.51 | 26052.84 | 31378.95 | 31471.93 |
| TC0700003717.mm.1                    |                       | 17.92    | 23.69    | 22.89    | 31.85    | 32.60    | 28.23    |
| TC0900002538.mm.1                    | Gm24225               | 27.77    | 49.19    | 33.64    | 69.84    | 65.77    | 66.51    |
| TC0100001322.mm.1                    |                       | 10.20    | 9.44     | 11.04    | 12.50    | 14.38    | 16.51    |
| TC0400002126.mm.1                    | 9430025C20Rik         | 15.87    | 16.19    | 15.13    | 20.38    | 20.72    | 17.48    |
| TC1200002487.mm.1                    | Mir6388               | 17.78    | 19.63    | 18.81    | 34.26    | 27.32    | 23.80    |
| TC0X00000431.mm.1                    | Gm22528               | 16.21    | 14.65    | 16.07    | 17.93    | 21.70    | 21.73    |
| TC0700002260.mm.1                    | Vmn2r-ps46            | 16.00    | 15.87    | 16.77    | 17.97    | 21.36    | 21.09    |
| TC1600001911.mm.1                    |                       | 9.39     | 8.14     | 7.74     | 13.37    | 10.78    | 11.03    |
| TC0700003327.mm.1                    | Gm22188               | 24.08    | 18.13    | 24.83    | 35.51    | 30.24    | 34.81    |
| TC1700000024.mm.1                    |                       | 12.94    | 11.90    | 13.12    | 18.08    | 19.15    | 14.78    |
| TC1100002774.mm.1                    |                       | 24.81    | 29.21    | 25.31    | 34.07    | 33.29    | 30.95    |
| TC1000001068.mm.1                    | Tyms-ps               | 140.91   | 115.07   | 125.17   | 185.56   | 154.13   | 193.50   |
| TC4_GL456216_random000000<br>05.mm.1 |                       | 60.83    | 43.60    | 53.26    | 73.27    | 73.22    | 77.19    |
| TC0700003291.mm.1                    | Gm25944               | 26.00    | 22.09    | 24.90    | 45.67    | 35.42    | 31.86    |
| TC0X00002737.mm.1                    | Gm9103                | 344.88   | 268.53   | 335.90   | 471.01   | 405.71   | 516.15   |
| TC1100001986.mm.1                    |                       | 16.33    | 16.53    | 20.37    | 22.71    | 23.77    | 22.65    |
| TC0X00000194.mm.1                    | Gm6923                | 19.16    | 17.93    | 16.53    | 29.66    | 22.02    | 24.80    |
| TC0300001662.mm.1                    |                       | 9.20     | 9.95     | 9.50     | 12.61    | 12.51    | 10.62    |
| TC1000002011.mm.1                    |                       | 15.47    | 15.24    | 17.73    | 21.30    | 18.83    | 22.40    |
| TC0800001261.mm.1                    |                       | 706.75   | 632.14   | 523.59   | 871.31   | 843.51   | 1041.44  |
| TC1100002838.mm.1                    |                       | 224.78   | 232.40   | 205.24   | 422.25   | 295.11   | 510.16   |
| TC0400004053.mm.1                    | Gm13064               | 10.51    | 12.25    | 9.66     | 13.91    | 14.62    | 13.50    |
| TC0300000677.mm.1                    | Gm25188               | 324.63   | 257.88   | 300.19   | 400.42   | 358.54   | 409.46   |
| TC0800002540.mm.1                    | Gm25267               | 8.08     | 10.54    | 8.51     | 11.85    | 16.33    | 17.13    |
| TC0100000089.mm.1                    |                       | 7.51     | 7.79     | 9.21     | 12.17    | 9.95     | 12.63    |
| TC1700001941.mm.1                    |                       | 35.16    | 39.73    | 51.02    | 69.61    | 58.21    | 78.23    |
| TC1000000443.mm.1                    |                       | 12.29    | 10.15    | 12.95    | 16.02    | 18.42    | 15.10    |
| TC1300000732.mm.1                    | Gm24999               | 87.05    | 109.84   | 90.00    | 129.61   | 130.02   | 166.56   |
| TC1100000050.mm.1                    |                       | 11.50    | 13.46    | 13.50    | 18.42    | 18.68    | 15.17    |
| TC0200000027.mm.1                    |                       | 9.22     | 8.40     | 9.21     | 10.36    | 13.43    | 12.41    |
| TC1000002758.mm.1                    |                       | 27.96    | 25.89    | 26.34    | 33.64    | 39.18    | 31.08    |
| TC1300001343.mm.1                    |                       | 8.31     | 8.38     | 8.85     | 9.69     | 12.44    | 11.80    |
| TC1700002310.mm.1                    | Gm16276               | 81.37    | 86.02    | 78.67    | 108.64   | 91.13    | 106.09   |
| TC1300002738.mm.1                    |                       | 14.75    | 12.37    | 14.40    | 26.08    | 17.49    | 25.21    |
| TC1700001640.mm.1                    | Snhg9                 | 20.62    | 18.54    | 18.52    | 24.15    | 28.15    | 22.67    |
| TC1800001387.mm.1                    |                       | 7.30     | 9.21     | 7.89     | 11.68    | 11.22    | 9.89     |
| TC1700001713.mm.1                    | Mir3083               | 21.32    | 23.27    | 22.03    | 35.75    | 40.85    | 27.18    |
| TC0700003311.mm.1                    | Gm22631               | 26.18    | 22.64    | 27.74    | 41.23    | 37.55    | 31.13    |
| TC0100002066.mm.1                    |                       | 17.55    | 21.94    | 19.60    | 28.28    | 23.66    | 27.08    |
| TC1700002759.mm.1                    |                       | 9.62     | 10.54    | 11.08    | 11.99    | 14.68    | 14.88    |
| TC0100002682.mm.1                    |                       | 12.50    | 12.38    | 13.62    | 17.67    | 21.01    | 15.37    |
| TC0100003469.mm.1                    | Gm16418               | 300.36   | 283.78   | 282.89   | 419.61   | 333.35   | 447.36   |
| TC1100003398.mm.1                    |                       | 28.56    | 42.44    | 25.06    | 50.57    | 72.02    | 59.47    |
| TC0400000097.mm.1                    |                       | 24.77    | 24.16    | 29.60    | 35.05    | 33.12    | 31.70    |
| TC1800000180.mm.1                    |                       | 7.67     | 7.71     | 7.79     | 8.61     | 10.76    | 10.72    |
| TC0100001809.mm.1                    |                       | 6.63     | 7.07     | 7.79     | 8.23     | 9.76     | 9.64     |
| TC1300001324.mm.1                    | Gm23198               | 36.86    | 34.53    | 39.25    | 42.59    | 53.45    | 47.96    |
| TC1400001154.mm.1                    |                       | 9.55     | 9.70     | 10.75    | 12.46    | 12.56    | 11.13    |
| TC1100000895.mm.1                    | Snord118              | 345.34   | 289.39   | 298.95   | 380.40   | 453.41   | 387.60   |
| TC0100001767.mm.1                    |                       | 11.38    | 13.29    | 13.28    | 14.88    | 18.29    | 18.89    |
| TC0200003864.mm.1                    | Gm13711               | 18.47    | 22.53    | 19.18    | 25.33    | 23.93    | 25.61    |
| TC1500001070.mm.1                    |                       | 9.15     | 9.25     | 8.80     | 11.96    | 12.04    | 9.97     |
| TC0600000279.mm.1                    | MESTIT1_3             | 23.84    | 16.57    | 24.45    | 30.26    | 41.67    | 40.61    |
| TC0300001464.mm.1                    |                       | 8.07     | 8.20     | 7.66     | 9.39     | 10.31    | 12.39    |
| TC0800001461.mm.1                    | Gm26784; RP23-76C13.3 | 12.58    | 12.98    | 15.40    | 16.53    | 17.32    | 16.95    |
| TC1000001586.mm.1                    | Mir677                | 132.96   | 152.73   | 133.16   | 189.90   | 208.04   | 162.94   |
| TC0800001935.mm.1                    | Gm22227               | 10.05    | 9.32     | 12.74    | 16.60    | 14.39    | 14.54    |
| TC1900001441.mm.1                    |                       | 14.11    | 18.79    | 16.38    | 22.66    | 20.71    | 22.73    |
| TC1400002559.mm.1                    |                       | 9.94     | 11.19    | 10.51    | 12.42    | 16.68    | 14.38    |
| TC1700002383.mm.1                    |                       | 10.97    | 12.74    | 10.97    | 15.83    | 13.30    | 15.38    |
| TC1100001244.mm.1                    | Gm11427               | 80.48    | 58.84    | 60.94    | 116.24   | 87.92    | 103.47   |
| TC0500001105.mm.1                    |                       | 8.96     | 8.93     | 10.43    | 12.57    | 15.08    | 11.51    |
| TC0400001002.mm.1                    | Gm12686               | 32.43    | 25.86    | 25.46    | 34.37    | 40.68    | 41.75    |
| TC0700003627.mm.1                    |                       | 10.53    | 10.68    | 11.51    | 15.23    | 15.49    | 12.29    |
| TC1400000878.mm.1                    |                       | 11.10    | 12.36    | 13.71    | 14.64    | 17.33    | 16.34    |
| TC0X00001709.mm.1                    |                       | 9.93     | 9.19     | 11.73    | 14.27    | 12.51    | 13.65    |
| TC1500001543.mm.1                    |                       | 47.13    | 57.24    | 48.66    | 98.19    | 65.23    | 77.90    |
| TC1600001155.mm.1                    | Nagpa                 | 142.34   | 151.67   | 129.11   | 194.51   | 162.11   | 201.88   |
| TC1400001951.mm.1                    |                       | 12.83    | 10.82    | 10.74    | 15.63    | 15.96    | 13.38    |
| TC0100003157.mm.1                    | Gm23763               | 20.28    | 18.05    | 19.09    | 30.66    | 28.25    | 22.28    |
| TC0900000814.mm.1                    | Gm23136               | 125.39   | 101.58   | 112.24   | 157.72   | 133.54   | 147.38   |
| TC0800001783.mm.1                    |                       | 9.54     | 10.68    | 12.03    | 13.96    | 19.28    | 14.91    |
| TC1200002197.mm.1                    |                       | 15.92    | 15.88    | 17.92    | 20.95    | 28.07    | 21.35    |
| TC1100002495.mm.1                    |                       | 8.70     | 8.52     | 8.82     | 12.19    | 9.61     | 11.90    |

|                   |                     |          |          |          |          |          |          |
|-------------------|---------------------|----------|----------|----------|----------|----------|----------|
| TC030000081.mm.1  |                     | 11.19    | 13.40    | 12.03    | 17.47    | 14.12    | 16.54    |
| TC1300000146.mm.1 |                     | 17.00    | 17.20    | 17.62    | 23.33    | 25.72    | 19.43    |
| TC0X00001073.mm.1 | Mir6382             | 12.49    | 10.54    | 8.92     | 13.65    | 18.47    | 17.27    |
| TC1600001088.mm.1 |                     | 10.78    | 11.10    | 12.21    | 17.08    | 13.02    | 15.61    |
| TC1800000611.mm.1 | Gm6960              | 110.52   | 92.87    | 74.64    | 140.71   | 158.57   | 125.50   |
| TC1500001962.mm.1 |                     | 174.36   | 212.11   | 150.11   | 237.77   | 255.65   | 248.87   |
| TC0800002034.mm.1 |                     | 23.88    | 26.83    | 24.16    | 27.58    | 31.90    | 31.56    |
| TC0100003213.mm.1 |                     | 12.30    | 10.39    | 12.03    | 13.31    | 15.98    | 16.18    |
| TC1300001356.mm.1 | Gm23308             | 10.70    | 10.40    | 10.35    | 11.82    | 15.94    | 15.02    |
| TC0800001378.mm.1 | Gm15655; AC113301.2 | 927.82   | 741.45   | 991.67   | 1754.18  | 1269.65  | 1234.42  |
| TC1900000259.mm.1 | Gm5512              | 90.37    | 95.50    | 72.56    | 128.90   | 106.02   | 127.92   |
| TC1300000870.mm.1 |                     | 17.27    | 16.23    | 16.26    | 19.26    | 25.27    | 20.93    |
| TC0500000558.mm.1 |                     | 11.26    | 12.44    | 10.89    | 14.92    | 17.77    | 13.56    |
| TC0600001631.mm.1 |                     | 1163.89  | 1144.21  | 1021.27  | 1702.91  | 1284.25  | 1751.13  |
| TC0800002176.mm.1 |                     | 10.97    | 12.36    | 14.81    | 16.93    | 18.10    | 16.14    |
| TC0500001349.mm.1 | Oas1b               | 155.22   | 151.90   | 140.77   | 219.84   | 168.05   | 207.85   |
| TC0200002065.mm.1 |                     | 10.10    | 11.26    | 9.99     | 11.62    | 13.22    | 13.92    |
| TC0X00000115.mm.1 | LOC100862340        | 1506.92  | 1384.79  | 1576.64  | 2713.61  | 1820.40  | 2148.90  |
| TC0200002370.mm.1 |                     | 33.52    | 45.94    | 33.68    | 64.00    | 48.87    | 58.33    |
| TC0400003403.mm.1 | Gm12855             | 11.26    | 8.83     | 10.41    | 13.24    | 15.35    | 12.53    |
| TC0800001785.mm.1 |                     | 10.07    | 9.91     | 9.65     | 14.10    | 11.10    | 15.07    |
| TC0100001424.mm.1 | Gm15428             | 524.40   | 413.01   | 433.56   | 788.06   | 565.32   | 668.21   |
| TC1000001297.mm.1 |                     | 9.46     | 9.23     | 10.08    | 13.62    | 13.58    | 10.69    |
| TC0200004705.mm.1 |                     | 10.62    | 9.49     | 8.41     | 11.37    | 14.02    | 12.63    |
| TC0800001779.mm.1 |                     | 12.86    | 13.60    | 12.39    | 16.74    | 17.00    | 14.15    |
| TC0X00003356.mm.1 |                     | 12.78    | 9.85     | 11.43    | 15.93    | 13.67    | 15.39    |
| TC0400002659.mm.1 |                     | 17.98    | 12.90    | 14.09    | 19.29    | 22.57    | 21.27    |
| TC0100002839.mm.1 | Gm22089             | 21.51    | 26.22    | 21.75    | 27.92    | 30.63    | 28.13    |
| TC1100000307.mm.1 | Gm22588             | 17.08    | 20.29    | 22.13    | 23.89    | 26.91    | 27.68    |
| TC1200000684.mm.1 | Gm24010             | 12.73    | 11.72    | 13.92    | 19.81    | 15.11    | 21.79    |
| TC0X00001279.mm.1 | Gm23124             | 9.39     | 9.74     | 9.31     | 12.65    | 10.30    | 12.60    |
| TC1000002864.mm.1 |                     | 15.03    | 14.12    | 11.76    | 18.50    | 18.71    | 16.29    |
| TC0400003703.mm.1 |                     | 14.08    | 14.22    | 15.42    | 20.29    | 18.67    | 16.17    |
| TC1000001217.mm.1 |                     | 38.21    | 22.72    | 34.87    | 49.34    | 51.54    | 59.06    |
| TC1100001554.mm.1 | Gm11633             | 77.89    | 76.39    | 89.87    | 98.06    | 104.77   | 128.09   |
| TC0100000458.mm.1 | Gm26293             | 118.52   | 94.86    | 136.66   | 170.46   | 155.68   | 162.82   |
| TC0500003362.mm.1 | Gm7902              | 1481.79  | 1659.14  | 1138.77  | 2090.12  | 1946.89  | 2004.13  |
| TC0200000182.mm.1 | Mir466              | 19.00    | 18.53    | 20.68    | 25.52    | 33.27    | 24.70    |
| TC1000001853.mm.1 | Gm4895              | 1367.28  | 1221.31  | 953.38   | 1604.70  | 1633.25  | 1662.44  |
| TC0300000141.mm.1 |                     | 17.26    | 18.97    | 20.81    | 26.49    | 26.00    | 21.69    |
| TC0X00000220.mm.1 |                     | 109.63   | 105.64   | 102.00   | 166.32   | 120.81   | 143.06   |
| TC0200001651.mm.1 | Olfr1293-ps         | 11.66    | 11.66    | 15.58    | 20.38    | 17.51    | 16.95    |
| TC0700003666.mm.1 | Vmn2r-ps67          | 8.63     | 7.77     | 8.72     | 11.95    | 9.45     | 12.49    |
| TC1800000765.mm.1 |                     | 82.90    | 109.04   | 92.08    | 209.41   | 121.50   | 173.06   |
| TC0600000285.mm.1 |                     | 10.72    | 11.82    | 13.75    | 17.55    | 17.91    | 14.31    |
| TC0600001529.mm.1 | Gm26160             | 21.64    | 20.38    | 25.72    | 32.45    | 26.79    | 35.12    |
| TC0700004116.mm.1 | Gm23345             | 24.98    | 23.42    | 29.65    | 32.12    | 52.26    | 49.22    |
| TC0400000953.mm.1 |                     | 12.49    | 11.18    | 13.60    | 16.25    | 14.12    | 16.18    |
| TC0900002650.mm.1 |                     | 11.74    | 15.00    | 11.07    | 15.75    | 17.69    | 17.68    |
| TC0300002844.mm.1 |                     | 8.70     | 8.97     | 8.32     | 12.87    | 14.07    | 9.83     |
| TC0400003069.mm.1 | Gm26410             | 13.95    | 17.11    | 13.98    | 20.73    | 21.12    | 17.47    |
| TC1700001349.mm.1 |                     | 12.67    | 12.05    | 12.99    | 17.83    | 18.96    | 13.99    |
| TC1600000691.mm.1 | Gm7204              | 17755.90 | 16618.79 | 17322.54 | 26261.44 | 19569.42 | 22076.61 |
| TC0600002088.mm.1 |                     | 8.82     | 8.76     | 10.26    | 12.41    | 11.59    | 10.50    |
| TC0100003517.mm.1 |                     | 43.64    | 54.30    | 44.14    | 57.69    | 68.06    | 81.75    |
| TC0600001323.mm.1 |                     | 251.42   | 315.28   | 247.08   | 365.38   | 336.87   | 338.08   |
| TC1500001317.mm.1 |                     | 8.88     | 9.60     | 8.28     | 13.40    | 11.41    | 10.28    |
| TC0X00002151.mm.1 | Gm5636              | 9.83     | 8.58     | 11.99    | 13.21    | 13.55    | 13.73    |
| TC0100001046.mm.1 |                     | 9.18     | 10.02    | 11.06    | 13.75    | 17.02    | 12.10    |
| TC0X00000969.mm.1 | Gm22472             | 12.95    | 15.39    | 17.07    | 18.28    | 20.55    | 20.01    |
| TC1400002077.mm.1 | Mir208b             | 7.80     | 7.84     | 8.15     | 8.69     | 11.43    | 11.18    |
| TC1500001659.mm.1 |                     | 52.08    | 40.66    | 43.36    | 62.08    | 65.16    | 53.38    |
| TC0700004381.mm.1 |                     | 12.65    | 10.53    | 11.51    | 19.86    | 14.60    | 26.45    |
| TC0800002355.mm.1 |                     | 11.52    | 11.78    | 8.11     | 22.89    | 13.77    | 24.08    |
| TC0100000877.mm.1 |                     | 15.74    | 15.11    | 17.37    | 17.84    | 22.49    | 21.22    |
| TC1800000002.mm.1 |                     | 21.38    | 23.75    | 19.02    | 29.70    | 24.56    | 28.71    |
| TC0100001121.mm.1 |                     | 3084.19  | 3155.56  | 2465.05  | 3428.80  | 4214.63  | 4163.57  |
| TC0900001958.mm.1 |                     | 10.30    | 9.64     | 9.30     | 12.92    | 14.50    | 10.87    |
| TC1800000921.mm.1 | Vmn1r-ps152         | 13.77    | 11.53    | 13.70    | 18.07    | 17.87    | 14.74    |
| TC0200000874.mm.1 | Gm13534             | 31.09    | 31.12    | 31.25    | 43.03    | 42.64    | 33.65    |
| TC0200001486.mm.1 | Gm22957             | 34.71    | 44.97    | 44.29    | 49.85    | 66.77    | 59.94    |
| TC0200003831.mm.1 |                     | 13.06    | 13.17    | 12.00    | 18.01    | 19.98    | 14.30    |
| TC1400001877.mm.1 | Gm3287; RP23-78F6.4 | 20.26    | 18.54    | 18.49    | 21.14    | 28.23    | 26.45    |
| TC0900002116.mm.1 |                     | 12.66    | 12.47    | 14.91    | 16.54    | 17.24    | 15.14    |
| TC1400001461.mm.1 |                     | 16.47    | 17.09    | 16.03    | 18.22    | 24.60    | 22.42    |
| TC1700002007.mm.1 | Gm4246              | 153.74   | 159.25   | 155.84   | 237.72   | 172.38   | 218.99   |
| TC0700004004.mm.1 |                     | 18.61    | 15.61    | 13.76    | 25.28    | 20.23    | 32.35    |
| TC0900000389.mm.1 | Olfr892-ps1         | 9.16     | 10.11    | 11.21    | 16.97    | 15.78    | 11.76    |
| TC0X00000374.mm.1 |                     | 13.00    | 11.49    | 11.18    | 13.63    | 20.04    | 19.26    |
| TC1500000311.mm.1 | AU022793            | 72.68    | 70.82    | 63.36    | 113.49   | 83.16    | 142.66   |



|                   |                     |         |         |         |         |         |         |
|-------------------|---------------------|---------|---------|---------|---------|---------|---------|
| TC0400003053.mm.1 | Gm22605             | 9.28    | 9.85    | 10.92   | 11.36   | 13.88   | 15.51   |
| TC0X00000711.mm.1 | Mir7092             | 24.37   | 31.88   | 28.11   | 39.48   | 50.74   | 83.76   |
| TC1900001655.mm.1 |                     | 10.32   | 9.62    | 9.15    | 16.30   | 13.75   | 11.12   |
| TC1600000724.mm.1 |                     | 11.03   | 14.87   | 17.07   | 23.39   | 23.37   | 18.67   |
| TC0200001440.mm.1 | Mir7222             | 10.98   | 9.93    | 12.75   | 13.08   | 14.79   | 14.82   |
| TC1400002654.mm.1 |                     | 23.26   | 36.39   | 27.33   | 55.19   | 50.30   | 37.69   |
| TC1000000535.mm.1 |                     | 10.34   | 9.10    | 10.95   | 14.92   | 14.38   | 11.42   |
| TC0200004517.mm.1 | 4930583P06Rik       | 6.94    | 7.13    | 7.13    | 12.07   | 9.55    | 8.18    |
| TC1300002731.mm.1 | LOC100861680        | 35.38   | 25.64   | 42.30   | 56.05   | 65.34   | 47.11   |
| TC0700003352.mm.1 |                     | 8.37    | 7.79    | 7.81    | 11.18   | 10.27   | 8.68    |
| TC0800001248.mm.1 |                     | 23.23   | 26.62   | 20.62   | 36.82   | 27.60   | 32.77   |
| TC1500001310.mm.1 |                     | 14.46   | 14.29   | 17.25   | 29.14   | 18.83   | 21.96   |
| TC0500001040.mm.1 |                     | 116.63  | 83.32   | 87.01   | 147.56  | 118.01  | 155.48  |
| TC0200001037.mm.1 |                     | 14.28   | 15.09   | 14.95   | 22.20   | 16.25   | 22.37   |
| TC0100001521.mm.1 |                     | 21.89   | 18.33   | 26.67   | 28.33   | 31.59   | 32.14   |
| TC0100003741.mm.1 | Gm23780             | 20.44   | 28.84   | 23.86   | 35.06   | 31.49   | 31.53   |
| TC1600001685.mm.1 |                     | 8.77    | 8.60    | 11.25   | 11.48   | 12.77   | 13.68   |
| TC1700000679.mm.1 | Gm25128             | 1533.87 | 1474.95 | 1993.11 | 5755.66 | 2711.46 | 2772.56 |
| TC0200003867.mm.1 | Gm13710             | 570.16  | 583.92  | 496.21  | 888.98  | 627.36  | 930.73  |
| TC1600000289.mm.1 | Snord66             | 41.08   | 30.99   | 40.91   | 72.73   | 46.42   | 60.28   |
| TC0300001859.mm.1 |                     | 15.39   | 16.99   | 17.15   | 24.42   | 18.19   | 24.21   |
| TC1100002294.mm.1 |                     | 16.23   | 15.13   | 15.45   | 18.45   | 20.39   | 27.01   |
| TC0500001940.mm.1 | Gm7332              | 737.17  | 713.12  | 597.39  | 1114.33 | 805.90  | 1291.55 |
| TC1700002725.mm.1 |                     | 9.89    | 10.01   | 13.93   | 13.98   | 18.28   | 18.10   |
| TC0800003210.mm.1 |                     | 11.44   | 12.11   | 12.44   | 16.27   | 21.76   | 14.28   |
| TC0500000016.mm.1 | Gm26238             | 22.18   | 23.02   | 26.86   | 27.56   | 40.64   | 37.03   |
| TC0600001927.mm.1 |                     | 17.17   | 14.37   | 14.96   | 20.68   | 20.27   | 17.21   |
| TC0500000469.mm.1 | Gm16014; AC164004.2 | 19.06   | 13.59   | 13.25   | 20.89   | 27.29   | 20.88   |
| TC1600000886.mm.1 |                     | 9.60    | 9.97    | 11.75   | 14.14   | 16.42   | 12.08   |
| TC0500000127.mm.1 |                     | 11.01   | 12.07   | 12.58   | 14.05   | 22.98   | 17.95   |
| TC0700000185.mm.1 | Gm24701             | 39.43   | 40.40   | 32.63   | 46.77   | 76.26   | 55.32   |
| TC1200002592.mm.1 | Ighv3-8             | 8.98    | 8.56    | 7.47    | 12.73   | 10.97   | 9.53    |
| TC0600001607.mm.1 | Gm25136             | 44.65   | 39.50   | 34.35   | 52.23   | 46.04   | 52.10   |
| TC0500002545.mm.1 |                     | 11.05   | 13.24   | 12.17   | 16.26   | 17.08   | 13.50   |
| TC0700001744.mm.1 | 1700025J12Rik       | 12.59   | 13.46   | 15.70   | 22.47   | 20.58   | 15.97   |
| TC0X00001184.mm.1 |                     | 7.17    | 9.52    | 9.10    | 10.17   | 12.39   | 12.50   |
| TC1500001443.mm.1 |                     | 10.25   | 11.34   | 10.28   | 13.40   | 12.12   | 16.45   |
| TC0200002951.mm.1 | Gm26478             | 13.96   | 12.98   | 16.42   | 17.72   | 26.89   | 20.37   |
| TC0800001890.mm.1 |                     | 10.51   | 13.15   | 10.50   | 15.21   | 19.93   | 31.40   |
| TC0100002108.mm.1 |                     | 19.46   | 21.63   | 19.57   | 22.37   | 29.16   | 25.49   |
| TC0400001368.mm.1 | Gm12883             | 13.04   | 11.93   | 13.73   | 17.47   | 19.79   | 14.39   |
| TC1100001805.mm.1 |                     | 28.92   | 28.02   | 26.28   | 38.18   | 36.78   | 29.89   |
| TC0X00000511.mm.1 | Gm14638             | 26.55   | 18.65   | 17.50   | 27.85   | 30.70   | 37.69   |
| TC0300002125.mm.1 | Gm20691             | 280.76  | 235.85  | 247.74  | 322.95  | 328.86  | 281.10  |
| TC1900000514.mm.1 |                     | 37.42   | 34.71   | 28.60   | 64.06   | 43.56   | 45.22   |
