# Supplementary material for: MicroRNA-26b-5p Inhibits Mouse Liver Fibrogenesis and Angiogenesis by Targeting PDGF Receptor-Beta
Source: PubMed Central journal article supplement (PMC6426711; doi:10.1016/j.omtn.2019.02.014), 2019-02-26
Supplement: mmc2.pdf [file mmc2.pdf]

**MicroRNA-26b-5p Inhibits Mouse Liver Fibrogenesis and Angiogenesis by Targeting PDGF Receptor-beta**

Le Yang#, Chengbin Dong#, Jingjing Yang, Lin Yang, Na Chang, Changbo Qi, Liying Li\*

**Supplementary table 2. The preliminary probe signal values of coding genes by microarray analysis in TGF- $\beta$ 1-treated BMSCs with or without miR-26b-5p mimics**

| Probe Set ID      | Gene Symbol        | Control mimics |           |           | miR-26b-5p mimics |           |           |
|-------------------|--------------------|----------------|-----------|-----------|-------------------|-----------|-----------|
|                   |                    | 1              | 2         | 3         | 4                 | 5         | 6         |
| TC150000300.mm.1  | Cthrc1             | 4090.91        | 4093.06   | 3812.53   | 1231.72           | 1229.18   | 1240.54   |
| TC0200004309.mm.1 | Fibin              | 103.45         | 108.05    | 104.45    | 44.27             | 43.07     | 44.92     |
| TC0400002812.mm.1 | Tnc                | 128077.50      | 130825.50 | 124266.10 | 50032.72          | 47542.00  | 50120.11  |
| TC0100002266.mm.1 | Uxs1               | 516.98         | 514.46    | 502.86    | 314.90            | 312.60    | 307.37    |
| TC0600002553.mm.1 | Sema4f             | 38.49          | 38.52     | 38.22     | 24.91             | 24.70     | 24.00     |
| TC0600002487.mm.1 | Vamp5              | 534.22         | 524.22    | 530.17    | 388.50            | 398.94    | 390.24    |
| TC0X00001271.mm.1 | Srpx2              | 27591.62       | 28517.91  | 26865.28  | 10383.21          | 9986.66   | 11037.69  |
| TC0900001175.mm.1 | Plod2              | 5763.61        | 5831.73   | 5318.29   | 1594.69           | 1765.21   | 1737.97   |
| TC0300000710.mm.1 | Crabp2             | 1948.52        | 1904.05   | 1729.05   | 465.29            | 519.46    | 485.05    |
| TC1300002143.mm.1 | Ctla2a             | 313.22         | 297.50    | 313.29    | 142.73            | 151.85    | 141.85    |
| TC0800002113.mm.1 | Mtus1              | 83.91          | 84.36     | 81.89     | 55.27             | 54.72     | 57.05     |
| TC1300002564.mm.1 | Mast4              | 68.20          | 68.02     | 66.38     | 51.59             | 51.04     | 50.40     |
| TC0800001480.mm.1 | Gm22               | 4427.76        | 4105.78   | 4072.15   | 1283.83           | 1451.41   | 1383.08   |
| TC1700001484.mm.1 | Thbs2              | 91825.34       | 92438.75  | 85682.51  | 30733.92          | 29060.50  | 32923.16  |
| TC0900002735.mm.1 | Col12a1            | 18779.30       | 19951.68  | 18074.78  | 8166.34           | 7707.84   | 8175.93   |
| TC1800001193.mm.1 | Hbegf              | 105.24         | 103.90    | 100.56    | 51.27             | 53.11     | 55.58     |
| TC1000001895.mm.1 | Enpp3              | 130.30         | 117.36    | 126.62    | 58.07             | 56.29     | 57.04     |
| TC0300003041.mm.1 | Bmpr1b             | 95.64          | 92.28     | 98.18     | 49.05             | 50.68     | 52.45     |
| TC0900002254.mm.1 | Ncam1              | 1018.66        | 1056.63   | 938.02    | 289.06            | 267.91    | 306.78    |
| TC0800001121.mm.1 | Ccl17              | 1684.17        | 1645.80   | 1678.67   | 408.94            | 438.11    | 494.93    |
| TC0800002447.mm.1 | Cyp4f18            | 36.51          | 35.60     | 35.58     | 20.82             | 19.87     | 21.42     |
| TC0100000064.mm.1 | Sulf1              | 7919.29        | 7927.90   | 7423.10   | 2723.62           | 2624.05   | 2990.33   |
| TC1300002460.mm.1 | F2rl1              | 28.28          | 27.41     | 26.29     | 15.92             | 16.21     | 16.47     |
| TC0700003437.mm.1 | Aldh1a3            | 295.16         | 265.41    | 264.53    | 100.77            | 105.45    | 109.52    |
| TC0200004133.mm.1 | Creb3l1            | 6793.36        | 6150.19   | 6096.24   | 2844.90           | 2790.12   | 2695.67   |
| TC0200004525.mm.1 | Fbn1               | 21423.53       | 22628.03  | 20712.25  | 10014.86          | 9604.35   | 10462.48  |
| TC1600000553.mm.1 | Cd80               | 2050.93        | 2140.06   | 2013.10   | 1080.20           | 1018.51   | 1107.75   |
| TC0300001173.mm.1 | Col11a1            | 123.76         | 134.72    | 122.26    | 60.89             | 58.56     | 56.92     |
| TC1300002079.mm.1 | Cxcl14             | 17150.01       | 14873.23  | 17004.40  | 5469.98           | 5491.03   | 5836.29   |
| TC0600002089.mm.1 | Creb3l2            | 1426.86        | 1443.59   | 1339.00   | 750.13            | 737.26    | 782.58    |
| TC1700000168.mm.1 | Smoc2              | 639.54         | 588.19    | 554.73    | 213.52            | 226.04    | 230.74    |
| TC0100001338.mm.1 | Ptgs2              | 64190.78       | 64012.60  | 56967.92  | 16961.35          | 16595.86  | 19301.96  |
| TC0100003240.mm.1 | Prg4               | 697.94         | 642.85    | 658.23    | 188.32            | 168.90    | 205.83    |
| TC0800000286.mm.1 | Plat               | 504.32         | 504.26    | 457.45    | 163.05            | 174.39    | 186.61    |
| TC1500000676.mm.1 | Kdelr3             | 16995.82       | 17600.57  | 16572.20  | 7989.62           | 7305.99   | 8201.86   |
| TC0700004431.mm.1 | Adam12             | 424.78         | 412.15    | 383.42    | 195.58            | 193.76    | 206.91    |
| TC1000001894.mm.1 | Enpp1              | 9468.10        | 9274.72   | 8690.00   | 3887.84           | 3428.64   | 3845.89   |
| TC0400001990.mm.1 | Errfi1             | 1291.72        | 1300.56   | 1178.41   | 651.47            | 617.26    | 645.59    |
| TC1200000142.mm.1 | Odc1               | 1762.39        | 1728.13   | 1657.79   | 1114.66           | 1120.59   | 1161.05   |
| TC0500001732.mm.1 | Kdelr2             | 342948.90      | 331388.80 | 335565.20 | 203443.90         | 216513.60 | 218673.80 |
| TC1300002392.mm.1 | Vcan               | 1109.47        | 1238.32   | 1099.05   | 380.97            | 348.51    | 408.95    |
| TC1000000817.mm.1 | Fstl3              | 189.28         | 175.96    | 165.94    | 85.81             | 81.82     | 84.61     |
| TC1200001500.mm.1 | Gm20472;<br>Gm4425 | 61.60          | 63.14     | 64.28     | 49.74             | 49.29     | 48.76     |
| TC0900001254.mm.1 | Dzip1l             | 90.07          | 88.45     | 87.50     | 66.21             | 62.69     | 63.98     |
| TC0100001112.mm.1 | Gpr39              | 87.42          | 79.83     | 81.52     | 50.26             | 49.04     | 50.22     |
| TC0900001236.mm.1 | Copb2              | 3743.67        | 3480.88   | 3481.15   | 2297.58           | 2271.64   | 2316.71   |
| TC1600001655.mm.1 | Cd200              | 1443.65        | 1338.64   | 1259.01   | 466.54            | 429.06    | 503.35    |
| TC0700004593.mm.1 | Tnfrsf23           | 3333.94        | 3655.37   | 3433.14   | 1420.27           | 1452.02   | 1616.50   |
| TC1000000508.mm.1 | Fabp7              | 1631.36        | 1700.46   | 1584.45   | 825.04            | 915.72    | 861.85    |
| TC0600000711.mm.1 | Abcg2              | 219.40         | 215.99    | 198.99    | 120.63            | 122.56    | 117.71    |
| TC0300001482.mm.1 | Ddah1              | 53946.30       | 54835.57  | 48588.68  | 24375.40          | 26080.29  | 24958.60  |
| TC0900001846.mm.1 | Col5a3             | 56.11          | 59.84     | 57.19     | 34.30             | 36.85     | 35.26     |
| TC0X00002676.mm.1 | Vsig4              | 5781.56        | 5668.73   | 4855.90   | 1644.44           | 1450.27   | 1385.16   |
| TC1000001027.mm.1 | Tmem263            | 298.88         | 287.23    | 277.27    | 136.44            | 135.29    | 151.20    |
| TC1300002287.mm.1 | Adamts16           | 53.89          | 51.60     | 49.21     | 28.46             | 30.21     | 28.18     |
| TC1000003163.mm.1 | Tmem198b           | 387.67         | 372.43    | 352.10    | 227.88            | 222.66    | 229.29    |
| TC1600001752.mm.1 | Tmem45a            | 835.76         | 823.26    | 883.56    | 434.63            | 388.41    | 384.86    |
| TC0900000285.mm.1 | Arhgap32           | 46.87          | 45.82     | 45.63     | 34.07             | 35.65     | 35.42     |
| TC1400002723.mm.1 | Uggt2              | 119.53         | 121.34    | 112.12    | 71.55             | 70.46     | 74.46     |
| TC0400003629.mm.1 | Serinc2            | 420.54         | 392.72    | 356.65    | 159.09            | 170.53    | 162.44    |
| TC1600001395.mm.1 | Masp1              | 762.91         | 718.25    | 666.08    | 365.08            | 354.67    | 369.88    |
| TC0600003412.mm.1 | Bcat1              | 365.91         | 342.47    | 340.11    | 201.43            | 182.90    | 192.94    |
| TC1900000725.mm.1 | Sfr1               | 13292.05       | 13644.59  | 13299.10  | 8762.40           | 9402.55   | 9282.85   |
| TC0X00000065.mm.1 | Praf2              | 8901.72        | 8816.79   | 8179.66   | 5161.67           | 5312.60   | 5010.31   |

|                   |                                 |           |           |           |           |           |           |
|-------------------|---------------------------------|-----------|-----------|-----------|-----------|-----------|-----------|
| TC0X00003038.mm.1 | Morf4l2                         | 309.87    | 309.31    | 300.60    | 241.66    | 233.55    | 242.11    |
| TC1200000253.mm.1 | Pxdn                            | 1100.84   | 1016.85   | 951.74    | 404.04    | 394.38    | 444.51    |
| TC0600000124.mm.1 | Tes                             | 247.89    | 266.37    | 253.17    | 178.47    | 174.00    | 173.04    |
| TC0100001218.mm.1 | Fmod                            | 10201.62  | 9975.40   | 9238.85   | 5761.09   | 5472.83   | 5420.30   |
| TC1000001284.mm.1 | Csrp2                           | 4639.46   | 4786.05   | 4255.64   | 1345.65   | 1449.99   | 1658.08   |
| TC0100001234.mm.1 | Kdm5b                           | 186.13    | 185.24    | 182.51    | 125.28    | 114.26    | 119.15    |
| TC0400003475.mm.1 | Mfsd2a                          | 108.86    | 109.65    | 102.87    | 72.93     | 73.89     | 75.78     |
| TC0100002544.mm.1 | Fn1                             | 407862.70 | 408064.40 | 402772.60 | 312748.70 | 293920.30 | 304051.60 |
| TC0100002736.mm.1 | Htr2b                           | 639.36    | 567.68    | 527.20    | 178.30    | 173.22    | 201.41    |
| TC0400000893.mm.1 | Gm13285;<br>Gm13290;<br>Gm13289 | 30.37     | 31.71     | 31.84     | 23.74     | 22.95     | 23.64     |
| TC0500000173.mm.1 | Lrrc17                          | 190.11    | 176.95    | 165.79    | 61.35     | 52.88     | 64.38     |
| TC1200001813.mm.1 | Sec23a                          | 7009.01   | 7384.85   | 6343.51   | 2881.80   | 2842.28   | 3153.21   |
| TC0400002962.mm.1 | Bnc2                            | 284.30    | 294.09    | 264.21    | 121.13    | 111.49    | 130.32    |
| TC1300002426.mm.1 | Thbs4                           | 1842.60   | 1663.65   | 1617.01   | 837.26    | 797.41    | 868.82    |
| TC0300000627.mm.1 | Fam198b                         | 2723.02   | 2829.93   | 2436.22   | 1238.58   | 1150.57   | 1244.59   |
| TC1500000086.mm.1 | C1qtnf3                         | 770.52    | 689.47    | 612.75    | 184.14    | 164.59    | 200.47    |
| TC0700001252.mm.1 | Nox4                            | 120.37    | 122.57    | 111.32    | 62.07     | 55.85     | 61.60     |
| TC1600001070.mm.1 | Kcnj15                          | 264.68    | 248.76    | 235.89    | 120.10    | 108.94    | 123.42    |
| TC0600000010.mm.1 | Col1a2                          | 41996.37  | 44577.20  | 39308.51  | 16549.15  | 15032.70  | 17937.17  |
| TC0200004511.mm.1 | Gatm                            | 97554.91  | 102259.30 | 88909.51  | 42744.93  | 39539.91  | 44825.32  |
| TC0300003225.mm.1 | Sirpb1a                         | 767.31    | 849.51    | 712.05    | 311.99    | 314.56    | 341.75    |
| TC0100002356.mm.1 | Rftn2                           | 134.46    | 131.38    | 119.44    | 72.62     | 69.41     | 72.63     |
| TC1500001548.mm.1 | Has2                            | 739.80    | 879.57    | 866.97    | 290.25    | 304.11    | 329.71    |
| TC1200001549.mm.1 | Rnf144a                         | 64.79     | 65.95     | 63.20     | 46.41     | 47.16     | 49.16     |
| TC1100000526.mm.1 | Gfpt2                           | 349.43    | 353.61    | 307.46    | 165.37    | 152.51    | 162.86    |
| TC1800000029.mm.1 | Zeb1                            | 730.93    | 719.40    | 641.94    | 369.14    | 359.35    | 379.63    |
| TC0900002396.mm.1 | Cd276                           | 1505.68   | 1471.09   | 1364.77   | 941.86    | 916.99    | 924.45    |
| TC0200002067.mm.1 | Plcb4                           | 86.69     | 88.31     | 89.14     | 65.01     | 62.16     | 66.51     |
| TC1900001527.mm.1 | Loxl4                           | 98.68     | 95.36     | 87.14     | 54.00     | 51.53     | 51.39     |
| TC1600001764.mm.1 | Col8a1                          | 1198.01   | 1216.22   | 1099.39   | 530.40    | 507.13    | 587.45    |
| TC0400000736.mm.1 | Pappa                           | 5203.13   | 5461.28   | 4689.83   | 1437.86   | 1336.85   | 1715.09   |
| TC1000000246.mm.1 | Ptprk                           | 185.11    | 186.24    | 173.76    | 97.31     | 94.37     | 106.49    |
| TC1800001479.mm.1 | Ccbe1                           | 83.18     | 80.03     | 72.99     | 44.21     | 45.52     | 44.12     |
| TC0500001327.mm.1 | Tbx3                            | 47.53     | 45.59     | 47.62     | 36.71     | 37.52     | 37.64     |
| TC0300002295.mm.1 | Bcan                            | 38.01     | 36.98     | 35.98     | 28.19     | 27.28     | 28.38     |
| TC1500001835.mm.1 | C1qtnf6                         | 256.69    | 250.09    | 225.67    | 101.36    | 96.53     | 113.10    |
| TC0100003754.mm.1 | Tgfb2                           | 6044.47   | 5782.24   | 5440.03   | 2294.20   | 1809.62   | 1980.98   |
| TC1100001448.mm.1 | Col1a1                          | 142831.90 | 146443.30 | 138341.80 | 71931.80  | 68046.87  | 79487.30  |
| TC0300002173.mm.1 | Golim4                          | 471.51    | 491.59    | 473.49    | 281.94    | 299.79    | 314.47    |
| TC0500003694.mm.1 | Stard13                         | 142.28    | 146.52    | 137.55    | 77.82     | 77.98     | 86.96     |
| TC0900000226.mm.1 | Bmper                           | 149.54    | 155.03    | 147.67    | 83.42     | 74.03     | 84.91     |
| TC1200002082.mm.1 | Ltbp2                           | 3927.70   | 3788.79   | 3258.76   | 1134.86   | 986.92    | 1234.12   |
| TC0800000483.mm.1 | Pdgfrl                          | 223.16    | 221.03    | 189.61    | 102.95    | 102.18    | 101.17    |
| TC1500000395.mm.1 | Col14a1                         | 167.31    | 180.41    | 162.15    | 102.25    | 103.92    | 107.90    |
| TC0600003002.mm.1 | Zfp9                            | 229.81    | 236.39    | 233.06    | 110.48    | 94.07     | 113.01    |
| TC0X00003066.mm.1 | Morc4                           | 104.16    | 108.22    | 98.59     | 70.79     | 70.45     | 71.96     |
| TC0600001384.mm.1 | Mfap5                           | 73475.43  | 73970.75  | 68403.70  | 34203.48  | 37112.41  | 39656.89  |
| TC0800000321.mm.1 | Fgfr1                           | 1177.44   | 1174.79   | 1033.14   | 571.66    | 544.57    | 596.81    |
| TC0900000720.mm.1 | Sema7a                          | 1455.65   | 1293.63   | 1165.09   | 396.26    | 336.67    | 418.02    |
| TC1600000760.mm.1 | Dcbld2                          | 627.00    | 614.82    | 596.37    | 351.03    | 321.95    | 369.37    |
| TC0600001653.mm.1 | Plekha5                         | 80.10     | 77.08     | 74.42     | 51.71     | 52.79     | 55.01     |
| TC0500000842.mm.1 | Pbbp                            | 426.09    | 411.84    | 368.77    | 118.71    | 93.15     | 122.42    |
| TC1400000976.mm.1 | Loxl2;<br>Mir6950;<br>Gm21451   | 6157.94   | 5989.28   | 5225.57   | 2221.93   | 2245.98   | 2559.61   |
| TC0700002477.mm.1 | Fosb                            | 54.97     | 53.46     | 56.11     | 37.09     | 40.11     | 38.39     |
| TC1600000536.mm.1 | Fstl1                           | 21750.00  | 22496.39  | 21310.10  | 11407.84  | 11914.93  | 13135.35  |
| TC0900002541.mm.1 | Tpm1                            | 4195.03   | 4078.09   | 3893.93   | 2285.87   | 2122.80   | 2422.08   |
| TC0600000914.mm.1 | Loxl3                           | 10240.40  | 10395.13  | 8638.36   | 4117.95   | 3905.65   | 4300.69   |
| TC0700002495.mm.1 | Apoc2; Apoc4                    | 61.80     | 63.84     | 61.49     | 44.27     | 40.50     | 43.17     |
| TC1300002540.mm.1 | Cdk7                            | 329.10    | 342.15    | 314.92    | 232.88    | 232.26    | 223.62    |
| TC0500003722.mm.1 | Medag                           | 248.06    | 242.02    | 202.25    | 79.75     | 79.61     | 90.70     |
| TC0700003804.mm.1 | Slco2b1                         | 173.99    | 163.96    | 152.62    | 98.40     | 96.60     | 99.43     |
| TC0800001599.mm.1 | Itgb1                           | 31294.19  | 29423.88  | 29012.91  | 19717.47  | 19184.03  | 20622.34  |
| TC0300003226.mm.1 | Gm5150                          | 389.30    | 338.77    | 367.54    | 201.78    | 213.22    | 202.62    |
| TC0600001029.mm.1 | Gata2                           | 80.32     | 82.68     | 76.58     | 57.75     | 59.02     | 59.29     |
| TC0X00000218.mm.1 | Timp1                           | 222235.30 | 205616.90 | 214167.50 | 145522.30 | 133826.70 | 139971.00 |
| TC0200000478.mm.1 | Col5a1                          | 470.58    | 450.42    | 408.02    | 193.05    | 159.45    | 182.45    |
| TC0100001373.mm.1 | Nmnat2                          | 73.34     | 73.42     | 76.47     | 53.59     | 56.13     | 56.89     |
| TC0600002574.mm.1 | Actg2                           | 88376.29  | 82114.52  | 81484.15  | 57955.10  | 55134.24  | 54549.74  |
| TC0200005291.mm.1 | Pmepa1                          | 7280.56   | 6823.37   | 6663.46   | 2999.79   | 2439.94   | 2951.45   |
| TC0100000343.mm.1 | Col3a1                          | 4364.70   | 4774.14   | 3941.62   | 1211.84   | 949.93    | 1269.71   |

|                   |                     |           |           |           |           |           |           |
|-------------------|---------------------|-----------|-----------|-----------|-----------|-----------|-----------|
| TC020000603.mm.1  | Angptl2             | 1158.87   | 1086.70   | 1094.49   | 636.24    | 562.76    | 641.68    |
| TC1400002785.mm.1 | Gm2897;<br>Gm3005   | 71.20     | 70.86     | 68.36     | 56.43     | 54.98     | 57.24     |
| TC1100003345.mm.1 | Myo1d               | 1082.30   | 1158.71   | 1019.44   | 595.73    | 618.51    | 649.01    |
| TC0200003689.mm.1 | Stk39               | 144.09    | 143.86    | 132.08    | 97.66     | 98.05     | 97.26     |
| TC0100001692.mm.1 | Kif26b              | 173.07    | 168.29    | 162.25    | 96.45     | 82.22     | 91.09     |
| TC0900003204.mm.1 | Rbms3               | 369.50    | 372.93    | 328.38    | 199.64    | 198.67    | 211.12    |
| TC1300000273.mm.1 | Cmah                | 204.96    | 226.42    | 188.93    | 102.27    | 104.01    | 107.93    |
| TC1900001266.mm.1 | Mamdc2              | 467.33    | 442.21    | 398.72    | 169.68    | 148.48    | 183.70    |
| TC0800000588.mm.1 | Asb5                | 53.80     | 48.51     | 50.91     | 33.08     | 34.25     | 34.65     |
| TC0700004288.mm.1 | Nupr1               | 4411.94   | 4378.86   | 4476.51   | 2977.83   | 3029.03   | 3266.41   |
| TC0700004403.mm.1 | Cpxm2               | 888.28    | 885.44    | 772.00    | 309.68    | 310.84    | 373.69    |
| TC1200002103.mm.1 | Tgfb3               | 29174.87  | 29770.60  | 26897.07  | 11708.85  | 10118.58  | 12787.35  |
| TC1500002162.mm.1 | Col2a1              | 92.91     | 93.57     | 89.52     | 66.19     | 62.68     | 68.05     |
| TC1100003688.mm.1 | Nr1d1               | 600.35    | 566.56    | 514.49    | 314.25    | 301.01    | 318.85    |
| TC0500001912.mm.1 | Steap2              | 199.46    | 205.70    | 195.45    | 120.56    | 124.39    | 135.41    |
| TC1200001990.mm.1 | Actn1               | 29283.57  | 28354.02  | 26264.23  | 18732.05  | 18800.25  | 18995.62  |
| TC1300000691.mm.1 | Tgfb1               | 37815.79  | 35861.73  | 35572.34  | 21686.48  | 23022.38  | 24302.08  |
| TC1400000368.mm.1 | Anxa8               | 5775.57   | 5391.04   | 4662.53   | 1812.09   | 1488.44   | 1843.26   |
| TC1300000113.mm.1 | Inhba               | 2422.97   | 2062.44   | 2144.62   | 857.20    | 935.20    | 1025.97   |
| TC0300001674.mm.1 | Sirpb1a;<br>Sirpb1b | 461.11    | 394.35    | 383.77    | 192.72    | 190.60    | 205.15    |
| TC1200000069.mm.1 | Sdc1                | 133.09    | 128.98    | 121.93    | 90.42     | 86.47     | 90.79     |
| TC0500000387.mm.1 | Rgs12               | 57.44     | 54.91     | 53.25     | 39.97     | 40.84     | 41.67     |
| TC0200000651.mm.1 | Ptgs1               | 159.40    | 153.32    | 139.10    | 88.44     | 80.88     | 84.41     |
| TC0300000408.mm.1 | Postn               | 70892.34  | 70066.14  | 68046.42  | 29157.92  | 23044.96  | 29137.50  |
| TC0900000824.mm.1 | Dennd4a             | 906.32    | 883.81    | 815.58    | 427.86    | 385.99    | 459.76    |
| TC0100002833.mm.1 | Hdlbp               | 31294.85  | 32102.27  | 30678.02  | 20743.23  | 18945.14  | 21158.59  |
| TC0X00000051.mm.1 | Shroom4             | 113.41    | 122.41    | 106.75    | 60.20     | 51.55     | 53.76     |
| TC1100001624.mm.1 | Fkbp10              | 15984.18  | 15990.01  | 14049.95  | 7990.68   | 6969.25   | 7697.47   |
| TC0100000895.mm.1 | Fam132b             | 327.88    | 330.99    | 273.19    | 110.62    | 104.13    | 126.34    |
| TC0400000654.mm.1 | Ugcg                | 3157.53   | 2972.40   | 2687.38   | 1536.77   | 1402.57   | 1549.08   |
| TC1000002583.mm.1 | Aldh1l2             | 294.13    | 291.96    | 256.64    | 146.74    | 148.91    | 160.17    |
| TC0400000602.mm.1 | Zfp462              | 102.53    | 103.22    | 97.21     | 63.93     | 62.80     | 69.56     |
| TC1800000646.mm.1 | Apcdd1              | 50.48     | 51.58     | 50.74     | 35.66     | 33.35     | 37.01     |
| TC1200000951.mm.1 | Flrt2               | 310.34    | 282.96    | 249.25    | 101.15    | 83.92     | 103.01    |
| TC0900002455.mm.1 | Glce; Mir5133       | 199.66    | 198.92    | 182.91    | 133.74    | 125.25    | 129.23    |
| TC1100003406.mm.1 | Dusp14              | 197.12    | 182.71    | 181.96    | 117.21    | 125.24    | 126.86    |
| TC0800002307.mm.1 | Tll1                | 233.68    | 232.25    | 184.09    | 77.19     | 80.92     | 85.16     |
| TC0900002542.mm.1 | Tln2                | 333.93    | 340.76    | 310.60    | 180.24    | 156.84    | 181.20    |
| TC1300002285.mm.1 | lce1                | 824.75    | 821.19    | 745.88    | 329.15    | 346.99    | 402.27    |
| TC0300000752.mm.1 | Thbs3               | 64.59     | 57.63     | 59.78     | 39.49     | 40.50     | 40.88     |
| TC0800001143.mm.1 | Ndrp4               | 124.69    | 117.55    | 114.82    | 80.13     | 77.92     | 84.21     |
| TC0500003431.mm.1 | Serpine1            | 125834.00 | 128730.90 | 121254.80 | 74218.59  | 73232.30  | 82733.80  |
| TC1800001269.mm.1 | Dpysl3              | 514.12    | 496.90    | 443.13    | 203.28    | 178.68    | 220.87    |
| TC1000000171.mm.1 | Sgk1                | 661.88    | 659.96    | 593.15    | 410.01    | 391.91    | 411.67    |
| TC1300001722.mm.1 | Sox4                | 130.37    | 129.70    | 136.95    | 98.78     | 100.94    | 104.14    |
| TC1400001726.mm.1 | Bmpr1a              | 1814.58   | 1762.23   | 1642.04   | 802.54    | 786.17    | 937.98    |
| TC1000002240.mm.1 | Adamts14            | 64.34     | 66.94     | 64.24     | 47.07     | 49.63     | 45.72     |
| TC0800000814.mm.1 | Tpm4                | 75797.85  | 79717.56  | 76821.34  | 60385.56  | 56657.41  | 59119.29  |
| TC0800002349.mm.1 | Csgalnact1          | 163.28    | 158.11    | 146.53    | 90.56     | 81.81     | 92.45     |
| TC1300002270.mm.1 | Adcy2               | 88.36     | 85.47     | 80.69     | 49.77     | 55.63     | 51.67     |
| TC0900003248.mm.1 | Cx3cr1              | 2104.79   | 1817.50   | 1664.09   | 854.93    | 818.82    | 819.13    |
| TC1500001121.mm.1 | Hoxc6               | 222.15    | 221.57    | 218.34    | 137.36    | 127.28    | 146.84    |
| TC1100004222.mm.1 | Pycr1               | 302.98    | 289.44    | 276.06    | 185.73    | 199.83    | 196.78    |
| TC0100001330.mm.1 | Brinp3              | 32.67     | 30.79     | 29.39     | 19.56     | 21.02     | 20.19     |
| TC0700001646.mm.1 | Parva               | 3858.60   | 3685.72   | 3492.12   | 2395.49   | 2553.92   | 2499.66   |
| TC0400002018.mm.1 | Gpr153              | 184.16    | 167.79    | 161.88    | 111.09    | 108.28    | 108.20    |
| TC1500000791.mm.1 | Prr5                | 96.83     | 92.17     | 93.07     | 74.09     | 69.52     | 71.03     |
| TC1400000030.mm.1 | Gm3239              | 74.24     | 74.36     | 79.42     | 58.48     | 58.31     | 59.19     |
| TC0900000834.mm.1 | Cilp                | 40.44     | 41.64     | 40.41     | 28.20     | 25.28     | 25.07     |
| TC0500002254.mm.1 | Sorcs2              | 101.04    | 90.79     | 87.79     | 48.93     | 47.87     | 53.60     |
| TC0100000894.mm.1 | Klhl30              | 97.15     | 98.25     | 84.03     | 52.86     | 50.62     | 51.58     |
| TC0100000298.mm.1 | Il1rl1              | 756.88    | 703.94    | 652.07    | 309.76    | 312.20    | 363.65    |
| TC1000000531.mm.1 | P4ha1               | 2289.76   | 2381.50   | 2083.98   | 1125.72   | 1104.45   | 1266.65   |
| TC0600001035.mm.1 | Mgll                | 82.21     | 80.94     | 78.58     | 59.18     | 57.74     | 53.92     |
| TC1400000986.mm.1 | Tnfrsf10b           | 762.48    | 741.90    | 751.10    | 371.48    | 389.69    | 446.60    |
| TC0700001841.mm.1 | Itgal               | 192.80    | 180.67    | 167.99    | 93.39     | 85.71     | 99.66     |
| TC1100000161.mm.1 | Egfr                | 1340.60   | 1335.59   | 1192.24   | 596.45    | 536.18    | 653.47    |
| TC0600000487.mm.1 | Arhgef5             | 67.34     | 66.21     | 62.76     | 48.66     | 50.48     | 48.12     |
| TC0200001729.mm.1 | Thbs1               | 658134.10 | 650853.60 | 638940.60 | 492675.50 | 451275.10 | 482743.60 |
| TC0X00000963.mm.1 | Dlg3                | 49.84     | 50.04     | 50.32     | 37.90     | 40.74     | 39.70     |
| TC0900001732.mm.1 | Arhgap42            | 278.45    | 265.36    | 245.45    | 170.23    | 160.40    | 168.27    |
| TC0X00002982.mm.1 | Pcdh19              | 980.62    | 1073.03   | 960.19    | 459.14    | 397.95    | 494.32    |

|                   |                              |          |          |          |          |          |          |
|-------------------|------------------------------|----------|----------|----------|----------|----------|----------|
| TC0900001056.mm.1 | Cd109                        | 797.89   | 796.25   | 689.22   | 323.65   | 262.34   | 319.34   |
| TC0700002951.mm.1 | Siglece                      | 114.31   | 122.60   | 120.81   | 84.05    | 89.78    | 86.10    |
| TC1400000599.mm.1 | Arhgef40                     | 51.97    | 51.62    | 50.52    | 40.17    | 40.61    | 42.61    |
| TC1100004126.mm.1 | Mxra7                        | 755.00   | 771.65   | 663.83   | 376.85   | 339.31   | 387.40   |
| TC0400000861.mm.1 | Adamts1                      | 32.03    | 33.64    | 32.05    | 22.49    | 24.09    | 24.28    |
| TC1900001484.mm.1 | Pdlim1                       | 20495.22 | 20003.54 | 19414.24 | 16096.86 | 15393.11 | 15283.62 |
| TC0600002861.mm.1 | Pdzrn3                       | 298.00   | 293.95   | 298.31   | 121.77   | 135.07   | 155.32   |
| TC0100003507.mm.1 | Uap1                         | 149.16   | 143.95   | 135.58   | 103.61   | 98.34    | 99.40    |
| TC1800001595.mm.1 | Lipg                         | 49.29    | 48.14    | 47.15    | 34.77    | 33.38    | 31.17    |
| TC0300000711.mm.1 | Nes                          | 78.66    | 76.39    | 76.27    | 42.46    | 39.21    | 47.08    |
| TC0500002252.mm.1 | Htra3                        | 832.07   | 755.93   | 708.43   | 369.95   | 323.13   | 382.35   |
| TC0100003113.mm.1 | Ppp1r12b                     | 58.51    | 59.49    | 58.20    | 44.54    | 47.87    | 46.44    |
| TC1100000015.mm.1 | Selm                         | 222.92   | 228.98   | 223.37   | 160.91   | 165.78   | 175.71   |
| TC1700002162.mm.1 | Vegfa                        | 795.90   | 818.89   | 745.80   | 382.66   | 352.32   | 431.75   |
| TC0500000084.mm.1 | Sema3a                       | 105.13   | 104.48   | 94.91    | 64.03    | 59.77    | 65.76    |
| TC1600002039.mm.1 | Tiam1                        | 63.75    | 60.54    | 61.95    | 48.38    | 46.09    | 49.04    |
| TC0700001064.mm.1 | Rgma                         | 47.24    | 48.13    | 47.05    | 37.21    | 37.45    | 39.54    |
| TC0800000749.mm.1 | Crlf1                        | 1189.76  | 1025.64  | 970.30   | 453.43   | 376.82   | 445.69   |
| TC0500001914.mm.1 | Steap1                       | 591.26   | 589.35   | 532.81   | 322.39   | 273.29   | 277.77   |
| TC0400002782.mm.1 | Zfp37                        | 84.87    | 91.66    | 88.13    | 54.02    | 59.77    | 59.37    |
| TC1600001548.mm.1 | Pdia5                        | 1631.00  | 1546.36  | 1407.62  | 660.53   | 703.70   | 797.30   |
| TC1100003948.mm.1 | Pitpnc1                      | 187.74   | 190.06   | 183.48   | 129.62   | 131.24   | 142.26   |
| TC1400001045.mm.1 | Htr2a                        | 787.69   | 725.28   | 607.86   | 259.17   | 238.90   | 286.33   |
| TC1400002293.mm.1 | Dock5                        | 495.21   | 500.37   | 451.72   | 297.74   | 287.83   | 318.35   |
| TC0800001984.mm.1 | Nrg1                         | 344.91   | 355.03   | 303.17   | 148.25   | 128.99   | 159.01   |
| TC0400002549.mm.1 | Gne                          | 161.52   | 167.99   | 159.30   | 132.85   | 126.67   | 127.22   |
| TC0600001019.mm.1 | Copg1                        | 2579.47  | 2475.35  | 2335.59  | 1618.64  | 1590.49  | 1725.38  |
| TC1700002438.mm.1 | Ptpnm                        | 128.63   | 122.16   | 115.79   | 78.07    | 73.71    | 81.71    |
| TC0300001431.mm.1 | Unc5c                        | 79.21    | 77.86    | 71.80    | 48.20    | 49.94    | 52.60    |
| TC100000402.mm.1  | Cd24a                        | 1067.92  | 944.09   | 842.15   | 385.50   | 351.01   | 418.66   |
| TC1100004003.mm.1 | Abca5                        | 84.78    | 85.70    | 80.25    | 62.88    | 61.55    | 65.21    |
| TC0300000631.mm.1 | Pdgfc                        | 1239.68  | 1179.75  | 1076.82  | 557.35   | 549.65   | 645.00   |
| TC0200002457.mm.1 | Lpin3                        | 58.75    | 55.52    | 56.17    | 40.90    | 43.17    | 43.86    |
| TC1000000671.mm.1 | Ccdc6                        | 1546.85  | 1589.06  | 1585.81  | 1192.83  | 1252.28  | 1280.05  |
| TC0900000976.mm.1 | Nedd4                        | 8994.98  | 8938.05  | 8809.70  | 7012.25  | 6663.56  | 7204.11  |
| TC1500000090.mm.1 | Adamts12                     | 2342.71  | 2477.63  | 2122.17  | 1100.02  | 970.16   | 1179.64  |
| TC0100003506.mm.1 | Ddr2                         | 1160.66  | 1218.07  | 1077.52  | 652.40   | 639.91   | 722.55   |
| TC0X00002648.mm.1 | Maged1                       | 1921.18  | 1949.81  | 1817.76  | 1023.64  | 950.55   | 1144.78  |
| TC0800001696.mm.1 | Col4a1                       | 96.75    | 96.48    | 89.60    | 64.73    | 60.17    | 66.08    |
| TC0100002278.mm.1 | Col5a2                       | 1670.58  | 1816.46  | 1507.52  | 582.10   | 443.11   | 595.69   |
| TC0X00002207.mm.1 | Gpc4                         | 8179.96  | 7931.57  | 6694.12  | 3228.67  | 3417.72  | 3744.76  |
| TC0500000305.mm.1 | Emilin1                      | 128.94   | 127.93   | 118.06   | 78.00    | 68.99    | 77.93    |
| TC1100002679.mm.1 | Zfp354c                      | 207.28   | 179.53   | 181.39   | 105.91   | 112.48   | 114.25   |
| TC1500001285.mm.1 | Fbxl7                        | 76.74    | 71.94    | 77.20    | 54.95    | 54.35    | 57.73    |
| TC1600000415.mm.1 | Dlg1                         | 762.56   | 779.20   | 734.46   | 561.09   | 564.54   | 598.66   |
| TC1700002181.mm.1 | Ptk7                         | 552.52   | 515.10   | 441.69   | 229.16   | 216.58   | 245.63   |
| TC0700002217.mm.1 | Peg3                         | 28.35    | 28.91    | 29.29    | 19.40    | 20.75    | 21.61    |
| TC1600000834.mm.1 | Robo1                        | 109.25   | 105.77   | 100.70   | 70.20    | 63.25    | 70.48    |
| TC0200000551.mm.1 | Ass1; Gm5424                 | 20924.05 | 20844.03 | 18537.75 | 13117.71 | 12948.04 | 12334.54 |
| TC1400002791.mm.1 | Gm3264;<br>Gm3173            | 53.79    | 51.16    | 53.56    | 41.92    | 41.95    | 43.72    |
| TC1000001626.mm.1 | Itga7                        | 51.63    | 53.68    | 48.94    | 36.84    | 33.72    | 35.21    |
| TC0400002529.mm.1 | Tpm2                         | 1510.63  | 1416.71  | 1459.89  | 829.91   | 783.04   | 930.66   |
| TC0600000128.mm.1 | Cav1                         | 2787.37  | 2616.10  | 2260.84  | 1258.24  | 1295.86  | 1361.01  |
| TC0400002532.mm.1 | Msmg                         | 111.01   | 107.06   | 105.79   | 84.82    | 86.85    | 81.19    |
| TC1300001209.mm.1 | Pde4d;<br>Mir1904            | 46.98    | 47.80    | 42.99    | 33.06    | 32.01    | 32.04    |
| TC0100002534.mm.1 | Ikzf2                        | 61.37    | 68.34    | 59.08    | 40.60    | 40.20    | 40.68    |
| TC1600001974.mm.1 | Adamts1                      | 2146.65  | 2082.01  | 1884.07  | 1241.41  | 1258.16  | 1343.04  |
| TC0700001382.mm.1 | Map6                         | 383.32   | 355.84   | 339.88   | 238.13   | 249.63   | 248.62   |
| TC1600000480.mm.1 | Itgb5                        | 20797.45 | 20487.22 | 19502.50 | 13819.38 | 14343.08 | 15203.11 |
| TC0600002315.mm.1 | Fkbp14                       | 554.81   | 553.78   | 459.58   | 272.23   | 269.23   | 282.99   |
| TC1000000211.mm.1 | Moxd1                        | 65.63    | 60.99    | 60.62    | 39.31    | 38.85    | 34.18    |
| TC1400002788.mm.1 | Gm5796;<br>Gm3095;<br>Gm8108 | 62.22    | 59.93    | 61.61    | 45.75    | 45.71    | 49.22    |
| TC1600001643.mm.1 | Boc                          | 196.15   | 189.32   | 182.30   | 142.58   | 134.59   | 144.19   |
| TC0100003478.mm.1 | Uck2                         | 5279.39  | 4935.49  | 4394.99  | 2666.94  | 2303.90  | 2417.04  |
| TC0900001200.mm.1 | Pcolce2                      | 48.19    | 43.98    | 45.41    | 34.06    | 31.75    | 32.83    |
| TC1400000290.mm.1 | Wnt5a                        | 168.02   | 168.72   | 142.47   | 82.52    | 73.06    | 83.67    |
| TC1300001173.mm.1 | Adamts6                      | 672.09   | 851.13   | 646.67   | 213.76   | 200.38   | 262.64   |
| TC0800001432.mm.1 | Crispld2                     | 43.07    | 42.97    | 44.24    | 30.11    | 33.36    | 32.24    |
| TC0900000544.mm.1 | Bace1                        | 621.30   | 553.85   | 501.35   | 282.37   | 248.24   | 278.82   |
| TC1500002318.mm.1 | Itga5                        | 17726.38 | 18252.60 | 16073.67 | 8284.90  | 7448.55  | 9317.33  |

|                   |              |          |          |          |          |          |          |
|-------------------|--------------|----------|----------|----------|----------|----------|----------|
| TC040000535.mm.1  | Tmeff1       | 1035.96  | 926.01   | 985.50   | 473.93   | 424.82   | 535.27   |
| TC150000175.mm.1  | Ank; Mir7117 | 1107.77  | 1059.10  | 962.89   | 520.54   | 480.34   | 583.50   |
| TC1000001919.mm.1 | Lama2        | 281.63   | 264.99   | 227.78   | 102.54   | 93.99    | 118.46   |
| TC1100004215.mm.1 | P4hb         | 19352.78 | 19072.86 | 18620.23 | 12746.16 | 12443.72 | 14042.49 |
| TC1700001403.mm.1 | Fndc1        | 45.01    | 43.66    | 39.48    | 23.70    | 26.45    | 26.28    |
| TC0500002833.mm.1 | Sec31a       | 6926.62  | 6675.00  | 6197.84  | 4511.56  | 4320.07  | 4663.12  |
| TC1100003222.mm.1 | Serpinf1     | 6663.32  | 6779.72  | 6305.07  | 4626.98  | 4299.18  | 4769.68  |
| TC0600000374.mm.1 | Ttc26        | 89.12    | 82.27    | 78.51    | 58.27    | 55.88    | 57.26    |
| TC0600000229.mm.1 | Calu         | 13234.46 | 12071.54 | 12356.32 | 8029.19  | 7463.27  | 8508.46  |
| TC0900002040.mm.1 | Pknox2       | 56.67    | 54.09    | 52.02    | 38.75    | 39.99    | 41.46    |
| TC0700001644.mm.1 | Mical2       | 837.22   | 793.77   | 763.42   | 503.53   | 457.94   | 527.70   |
| TC0700000557.mm.1 | Clip3        | 718.24   | 676.47   | 657.04   | 443.48   | 378.08   | 412.86   |
| TC1300000566.mm.1 | Aspn         | 3455.38  | 3875.18  | 3014.98  | 1073.56  | 738.69   | 1006.50  |
| TC0700001640.mm.1 | Usp47        | 643.17   | 666.02   | 611.97   | 459.48   | 430.33   | 469.90   |
| TC0100003352.mm.1 | Rabgap1l     | 118.21   | 118.63   | 110.86   | 87.93    | 90.58    | 92.25    |
| TC1800001338.mm.1 | Ppic         | 24942.11 | 23010.85 | 21837.89 | 13964.10 | 12038.98 | 13538.91 |
| TC1900001131.mm.1 | Ms4a7        | 86643.70 | 88180.56 | 83966.42 | 63801.80 | 59620.06 | 65912.24 |
| TC1200000760.mm.1 | Ttc9         | 89.70    | 81.95    | 76.01    | 42.11    | 36.56    | 44.15    |
| TC1300002141.mm.1 | Ctla2b       | 1132.91  | 983.29   | 1136.39  | 676.90   | 635.98   | 674.91   |
| TC0300000990.mm.1 | Tbx15        | 2596.38  | 2611.05  | 2182.69  | 1284.82  | 1401.06  | 1282.96  |
| TC0600002178.mm.1 | Tcaf1        | 94.48    | 96.23    | 86.02    | 65.64    | 64.47    | 61.99    |
| TC1600000938.mm.1 | Jam2         | 61.25    | 60.65    | 56.71    | 47.48    | 46.51    | 46.13    |
| TC0400003568.mm.1 | Gjb5         | 107.10   | 94.91    | 84.64    | 42.80    | 44.25    | 48.94    |
| TC0600000948.mm.1 | Dysf         | 431.36   | 404.91   | 380.03   | 244.29   | 225.29   | 259.18   |
| TC1200001562.mm.1 | Sox11        | 69.81    | 71.85    | 68.08    | 49.38    | 54.42    | 51.56    |
| TC1400000071.mm.1 | Flnb         | 2932.70  | 2740.11  | 2541.17  | 1526.30  | 1334.94  | 1580.38  |
| TC0100003502.mm.1 | Rgs4         | 436.97   | 375.84   | 381.58   | 227.48   | 198.40   | 225.69   |
| TC0100002038.mm.1 | Tram2        | 2870.07  | 2692.61  | 2436.89  | 1534.13  | 1388.86  | 1582.86  |
| TC1100000041.mm.1 | Lif          | 160.89   | 169.04   | 160.66   | 90.75    | 86.83    | 105.02   |
| TC1400002794.mm.1 | Gm3298       | 73.26    | 80.98    | 74.47    | 53.20    | 55.93    | 55.88    |
| TC0600001740.mm.1 | Ppfibp1      | 473.67   | 465.54   | 440.34   | 251.80   | 248.02   | 295.16   |
| TC0900000336.mm.1 | Cdon         | 112.23   | 107.03   | 106.16   | 66.56    | 75.12    | 75.19    |
| TC0700001651.mm.1 | Tead1        | 714.32   | 742.46   | 692.48   | 420.03   | 387.50   | 465.84   |
| TC1500000489.mm.1 | Wisp1        | 3853.81  | 3502.63  | 3098.01  | 1220.48  | 1232.07  | 1569.90  |
| TC1500002159.mm.1 | Vdr          | 259.56   | 236.26   | 198.23   | 100.66   | 108.33   | 110.06   |
| TC1300002463.mm.1 | Iqgap2       | 327.66   | 323.17   | 300.50   | 211.82   | 188.55   | 212.69   |
| TC1100001748.mm.1 | Mrc2         | 1749.83  | 1619.63  | 1361.24  | 686.60   | 623.77   | 744.62   |
| TC0500000499.mm.1 | Slit2        | 422.67   | 445.74   | 379.18   | 239.56   | 221.72   | 252.35   |
| TC0800001077.mm.1 | Mmp2         | 11414.29 | 10642.45 | 9006.57  | 5113.55  | 4927.31  | 5417.62  |
| TC0X00003133.mm.1 | Amot         | 98.07    | 92.25    | 85.72    | 59.29    | 55.04    | 60.97    |
| TC0900002128.mm.1 | Oaf          | 1874.47  | 1686.48  | 1650.98  | 890.26   | 769.99   | 958.87   |
| TC1900000141.mm.1 | Pla2g16      | 83.28    | 81.64    | 80.48    | 58.23    | 55.82    | 62.82    |
| TC1500000897.mm.1 | Lrrk2        | 222.93   | 233.33   | 197.64   | 119.97   | 111.30   | 128.94   |
| TC0200001951.mm.1 | Slc20a1      | 2682.81  | 2882.04  | 2579.17  | 1360.57  | 1279.92  | 1589.90  |
| TC1100003966.mm.1 | Prkca        | 198.80   | 191.52   | 185.11   | 121.03   | 106.81   | 125.92   |
| TC0900000212.mm.1 | Cnn1         | 12371.17 | 12137.00 | 10822.97 | 6808.01  | 7200.29  | 7662.16  |
| TC1300000998.mm.1 | Edil3        | 103.30   | 109.28   | 87.27    | 53.74    | 52.01    | 54.38    |
| TC0700002171.mm.1 | Ili1         | 44.07    | 44.04    | 40.27    | 31.71    | 29.68    | 29.39    |
| TC0100002305.mm.1 | Nabp1        | 1153.86  | 1214.39  | 1036.05  | 435.50   | 322.17   | 448.81   |
| TC0X00000122.mm.1 | Sytl5        | 40.07    | 40.61    | 38.70    | 21.42    | 25.60    | 21.28    |
| TC1100003993.mm.1 | Fam20a       | 1127.16  | 1128.44  | 965.72   | 537.11   | 425.28   | 507.24   |
| TC0400001329.mm.1 | P3h1         | 461.73   | 425.81   | 380.99   | 234.34   | 199.79   | 224.71   |
| TC1600001827.mm.1 | Epha3        | 138.98   | 146.33   | 121.28   | 77.63    | 72.10    | 80.10    |
| TC1000000215.mm.1 | Ctgf         | 59955.32 | 57473.67 | 51685.11 | 31472.54 | 33496.51 | 35920.00 |
| TC1900000205.mm.1 | Ddb1         | 16988.42 | 16582.98 | 15773.35 | 11281.63 | 10829.59 | 12198.74 |
| TC0X00003114.mm.1 | Capn6        | 80.02    | 79.00    | 68.31    | 41.94    | 37.76    | 44.20    |
| TC0X00003168.mm.1 | Maged2       | 271.11   | 246.82   | 241.84   | 166.04   | 171.80   | 180.92   |
| TC1700000092.mm.1 | Pde10a       | 51.55    | 53.14    | 49.54    | 38.71    | 34.79    | 37.38    |
| TC0700004134.mm.1 | Copb1        | 4382.40  | 4438.13  | 4012.26  | 2771.09  | 2859.05  | 3072.62  |
| TC1300000105.mm.1 | Gli3         | 228.09   | 228.73   | 208.81   | 154.57   | 139.79   | 154.40   |
| TC1600000797.mm.1 | Vgll3        | 2361.71  | 2439.20  | 2137.88  | 1442.19  | 1520.06  | 1582.92  |
| TC1100001730.mm.1 | Itgb3        | 107.49   | 85.76    | 93.22    | 52.13    | 50.99    | 53.96    |
| TC0400002918.mm.1 | Mpdz         | 76.65    | 81.97    | 75.96    | 57.17    | 57.45    | 61.28    |
| TC0300001117.mm.1 | Slc16a4      | 109.96   | 117.01   | 105.63   | 54.05    | 52.28    | 65.48    |
| TC1700002776.mm.1 | Pram1        | 71.16    | 65.93    | 64.07    | 43.78    | 36.80    | 39.79    |
| TC0600000661.mm.1 | Gars         | 4874.55  | 4686.02  | 4565.86  | 3163.17  | 2942.97  | 3398.66  |
| TC0700003743.mm.1 | Ddias        | 157.57   | 175.05   | 155.28   | 112.19   | 117.28   | 115.10   |
| TC0400003670.mm.1 | Phactr4      | 606.96   | 585.79   | 590.04   | 464.71   | 414.98   | 425.38   |
| TC1000000578.mm.1 | Gm5424       | 23938.54 | 24395.98 | 20518.09 | 13905.45 | 14078.44 | 13082.18 |
| TC0100003700.mm.1 | Enah         | 749.25   | 709.42   | 765.84   | 560.68   | 524.19   | 569.97   |
| TC1700001166.mm.1 | Ltbp1        | 369.03   | 358.16   | 316.96   | 199.19   | 185.79   | 216.26   |
| TC0600000459.mm.1 | Zyx          | 3689.70  | 3368.89  | 3208.20  | 2393.80  | 2234.55  | 2305.22  |
| TC0300002629.mm.1 | Olfml3       | 166.63   | 158.59   | 156.50   | 103.99   | 118.77   | 111.01   |
| TC0X00002983.mm.1 | Tspan6       | 3325.08  | 3124.25  | 2884.27  | 1701.47  | 1786.09  | 1991.93  |

|                   |                              |           |           |           |          |          |          |
|-------------------|------------------------------|-----------|-----------|-----------|----------|----------|----------|
| TC1800001334.mm.1 | Lox                          | 139929.60 | 136252.00 | 127740.70 | 87387.32 | 81391.66 | 94215.07 |
| TC1900001437.mm.1 | Ankrd1                       | 7977.05   | 6799.29   | 5778.03   | 2943.49  | 2647.81  | 3005.23  |
| TC1600001459.mm.1 | Lrrc15                       | 1395.77   | 1831.82   | 1183.93   | 454.31   | 387.87   | 470.51   |
| TC0900002391.mm.1 | Lox1                         | 43220.42  | 40497.06  | 37116.02  | 25643.93 | 23549.60 | 26254.29 |
| TC0300000675.mm.1 | Sh3d19                       | 253.47    | 235.47    | 226.77    | 146.33   | 123.15   | 144.56   |
| TC1100000464.mm.1 | Adam19                       | 2205.13   | 2079.07   | 1824.79   | 1239.21  | 1125.69  | 1205.44  |
| TC0900001428.mm.1 | Col7a1;<br>Mir711            | 44.45     | 49.23     | 46.39     | 33.06    | 35.54    | 33.45    |
| TC1500000503.mm.1 | Khdrbs3                      | 138.79    | 134.86    | 127.87    | 84.01    | 90.77    | 96.33    |
| TC1700000523.mm.1 | Glp1r                        | 178.48    | 210.31    | 151.93    | 79.08    | 71.34    | 79.09    |
| TC1900000467.mm.1 | Papss2                       | 1242.66   | 1197.22   | 1046.24   | 695.87   | 664.38   | 734.85   |
| TC1300002520.mm.1 | Map1b                        | 320.45    | 304.58    | 289.11    | 188.49   | 178.65   | 208.85   |
| TC0900000791.mm.1 | Itga11                       | 5105.34   | 4753.90   | 4205.58   | 2338.07  | 2044.19  | 2528.16  |
| TC0100001703.mm.1 | Cdc42bpa                     | 348.06    | 386.80    | 322.38    | 200.33   | 183.35   | 212.03   |
| TC0700003797.mm.1 | Serpinh1                     | 1283.21   | 1252.48   | 1025.69   | 604.46   | 613.03   | 656.50   |
| TC1000002076.mm.1 | Sobp                         | 148.85    | 184.10    | 149.10    | 85.91    | 78.34    | 86.14    |
| TC1200001302.mm.1 | Esy2                         | 5969.34   | 6040.67   | 5231.42   | 3220.70  | 2928.50  | 3499.07  |
| TC0100000338.mm.1 | Gulp1                        | 443.86    | 525.96    | 418.51    | 255.29   | 249.27   | 262.61   |
| TC0100000541.mm.1 | Ccnyl1                       | 5048.05   | 5396.14   | 4583.71   | 3002.99  | 2873.00  | 3247.29  |
| TC1100001304.mm.1 | Tbx4                         | 26.09     | 25.57     | 26.66     | 22.13    | 20.82    | 20.64    |
| TC1700001798.mm.1 | Btb9                         | 225.67    | 219.29    | 217.59    | 167.12   | 181.73   | 167.14   |
| TC0600000714.mm.1 | Herc3                        | 117.67    | 110.41    | 107.63    | 84.31    | 83.40    | 88.56    |
| TC1000002846.mm.1 | Nav3                         | 60.16     | 60.49     | 57.15     | 47.41    | 46.70    | 49.61    |
| TC0700001186.mm.1 | Adamtsl3                     | 140.48    | 133.46    | 129.24    | 99.01    | 86.85    | 91.79    |
| TC0100003119.mm.1 | Lgr6                         | 68.77     | 67.11     | 58.51     | 37.82    | 36.73    | 41.50    |
| TC0900000200.mm.1 | Carm1                        | 818.40    | 827.96    | 802.15    | 662.54   | 597.70   | 633.60   |
| TC1200001281.mm.1 | Crip2                        | 7055.31   | 6460.12   | 5988.87   | 4007.09  | 3402.39  | 3786.11  |
| TC1600001236.mm.1 | Pdxdc1                       | 1197.36   | 1204.44   | 1156.11   | 832.53   | 828.58   | 927.15   |
| TC0100002177.mm.1 | Neur13                       | 849.72    | 755.46    | 752.04    | 303.68   | 321.28   | 410.82   |
| TC0600000232.mm.1 | Flnc                         | 963.56    | 920.34    | 797.52    | 513.37   | 462.34   | 529.63   |
| TC1300002725.mm.1 | Parp8                        | 1786.09   | 1801.87   | 1612.61   | 1026.19  | 913.53   | 1103.70  |
| TC0600003005.mm.1 | Cacna1c                      | 171.03    | 171.16    | 162.86    | 106.18   | 99.78    | 119.01   |
| TC0800002184.mm.1 | Wwc2                         | 379.57    | 389.00    | 355.51    | 236.62   | 223.34   | 262.38   |
| TC1400001902.mm.1 | Fermt2                       | 4829.89   | 4680.77   | 4117.81   | 2596.78  | 2325.29  | 2762.60  |
| TC1800001478.mm.1 | Lman1                        | 9422.95   | 9093.94   | 8306.39   | 5677.26  | 4917.02  | 5694.00  |
| TC1000002458.mm.1 | Syde1                        | 1820.45   | 1893.73   | 1632.77   | 1238.10  | 1161.33  | 1208.61  |
| TC0600001203.mm.1 | Bhlhe40                      | 285.95    | 263.12    | 266.50    | 168.02   | 131.96   | 142.93   |
| TC0100003827.mm.1 | Hhat                         | 108.17    | 105.49    | 94.14     | 72.26    | 72.31    | 72.56    |
| TC0500000602.mm.1 | Fam114a1                     | 1437.44   | 1393.63   | 1261.06   | 843.00   | 757.72   | 889.19   |
| TC0X00002685.mm.1 | Eda2r                        | 210.80    | 208.34    | 178.98    | 117.14   | 100.22   | 115.55   |
| TC1800001026.mm.1 | Cdh2                         | 303.65    | 290.74    | 277.98    | 191.28   | 172.22   | 202.46   |
| TC1700001794.mm.1 | Mdga1                        | 90.22     | 80.58     | 77.21     | 55.74    | 50.64    | 53.67    |
| TC1200000596.mm.1 | Frmf6                        | 370.01    | 342.93    | 322.05    | 216.13   | 183.28   | 211.70   |
| TC0600000678.mm.1 | Fkbp9                        | 5872.90   | 5322.71   | 5275.03   | 3368.41  | 2869.43  | 3432.50  |
| TC0200004251.mm.1 | Prrg4                        | 94.20     | 89.27     | 79.50     | 57.56    | 58.71    | 55.54    |
| TC0800000653.mm.1 | Sh3rf1                       | 286.07    | 262.09    | 245.79    | 154.38   | 142.11   | 168.90   |
| TC0300003077.mm.1 | Sh3glb1                      | 17729.10  | 18169.16  | 17303.66  | 14162.71 | 13445.08 | 14652.73 |
| TC1400002783.mm.1 | Gm2956                       | 74.96     | 75.12     | 73.00     | 57.62    | 62.52    | 57.79    |
| TC1000001949.mm.1 | Hey2                         | 38.92     | 38.86     | 39.48     | 25.51    | 25.95    | 29.53    |
| TC1300002059.mm.1 | Dbn1                         | 450.27    | 475.75    | 411.99    | 303.79   | 282.34   | 309.24   |
| TC1000000572.mm.1 | Sar1a                        | 9529.86   | 10109.78  | 9451.05   | 5944.01  | 6204.06  | 6991.11  |
| TC0800000384.mm.1 | Purg                         | 76.24     | 77.23     | 77.62     | 56.33    | 56.42    | 62.54    |
| TC1600000193.mm.1 | Pkp2                         | 88.38     | 92.06     | 75.29     | 52.88    | 49.06    | 49.89    |
| TC0900001792.mm.1 | Fat3                         | 51.15     | 54.56     | 48.08     | 36.13    | 36.60    | 38.39    |
| TC1600001922.mm.1 | Nrip1                        | 68.54     | 72.57     | 69.11     | 54.24    | 53.72    | 58.00    |
| TC0300000228.mm.1 | Usp13                        | 41.33     | 41.59     | 38.43     | 29.68    | 31.79    | 31.62    |
| TC0200001552.mm.1 | Cd59a                        | 2093.43   | 2017.01   | 1769.45   | 1124.36  | 1093.72  | 1258.68  |
| TC0900002175.mm.1 | Arcn1                        | 1855.80   | 1997.40   | 1837.87   | 1445.50  | 1360.58  | 1478.13  |
| TC1400001429.mm.1 | Gm10128                      | 57.19     | 52.16     | 55.05     | 41.04    | 43.17    | 43.44    |
| TC0300000354.mm.1 | Noct                         | 103.26    | 103.33    | 100.87    | 71.30    | 64.44    | 75.80    |
| TC1400002116.mm.1 | Gzmd; Gzme                   | 435.34    | 384.25    | 360.08    | 247.80   | 217.24   | 228.90   |
| TC1100003240.mm.1 | Nxn                          | 1942.74   | 1843.26   | 1651.10   | 825.75   | 756.21   | 1001.39  |
| TC0900002887.mm.1 | Zbtb38;<br>E030011O05R<br>ik | 235.10    | 239.26    | 224.33    | 145.26   | 132.10   | 160.89   |
| TC0500000527.mm.1 | Sod3                         | 53.64     | 54.31     | 52.16     | 37.62    | 34.49    | 40.17    |
| TC1600000439.mm.1 | Ubxn7                        | 230.82    | 235.41    | 251.19    | 183.21   | 170.73   | 185.82   |
| TC0200003033.mm.1 | Dnajc1                       | 353.73    | 352.38    | 322.06    | 214.72   | 207.49   | 242.43   |
| TC0100003830.mm.1 | Sertad4                      | 245.98    | 252.24    | 221.87    | 145.19   | 116.09   | 135.79   |
| TC0200002549.mm.1 | Slc2a10                      | 104.45    | 93.36     | 89.73     | 62.29    | 66.76    | 65.64    |
| TC1000000322.mm.1 | Lama4                        | 238.33    | 262.28    | 235.34    | 159.32   | 139.41   | 163.58   |
| TC1300001242.mm.1 | Plk2                         | 2283.69   | 2391.45   | 1930.67   | 1096.56  | 967.42   | 1204.72  |
| TC1000001743.mm.1 | Adgb                         | 45.16     | 49.55     | 47.98     | 27.41    | 32.92    | 28.63    |
| TC0600000331.mm.1 | Cald1                        | 1136.17   | 1223.35   | 1076.03   | 740.26   | 714.60   | 814.13   |

|                    |          |          |          |          |          |          |          |
|--------------------|----------|----------|----------|----------|----------|----------|----------|
| TC1900000382.mm.1  | Ptar1    | 284.38   | 299.10   | 265.03   | 180.25   | 154.12   | 182.57   |
| TC1500000125.mm.1  | Cdh10    | 29.57    | 32.17    | 30.68    | 24.07    | 23.17    | 21.76    |
| TC0200000549.mm.1  | Ncs1     | 413.16   | 390.38   | 369.83   | 245.53   | 217.48   | 261.94   |
| TC0800000874.mm.1  | Zfp827   | 143.32   | 141.95   | 137.02   | 101.12   | 89.95    | 104.25   |
| TC11000003769.mm.1 | Jup      | 216.91   | 196.83   | 180.20   | 127.15   | 110.38   | 113.93   |
| TC1000001110.mm.1  | Ikbip    | 384.61   | 407.51   | 362.19   | 266.30   | 232.71   | 262.61   |
| TC0900001771.mm.1  | Amotl1   | 141.79   | 143.55   | 137.82   | 96.83    | 80.30    | 93.78    |
| TC1900000495.mm.1  | Stambpl1 | 453.56   | 429.32   | 408.21   | 307.36   | 277.92   | 312.81   |
| TC0100002789.mm.1  | Col6a3   | 1177.80  | 1162.02  | 1084.06  | 658.07   | 533.23   | 679.14   |
| TC1400000795.mm.1  | Nfatc4   | 116.72   | 117.93   | 105.91   | 83.59    | 74.95    | 75.11    |
| TC0900000033.mm.1  | Casp12   | 274.95   | 274.29   | 243.15   | 188.63   | 173.56   | 186.74   |
| TC1500002076.mm.1  | Slc2a13  | 85.98    | 87.62    | 78.73    | 63.67    | 60.06    | 64.08    |
| TC1700001783.mm.1  | Mtch1    | 5022.57  | 4583.20  | 4373.86  | 3346.43  | 3138.05  | 3359.02  |
| TC1200000263.mm.1  | Lamb1    | 516.75   | 488.88   | 425.96   | 249.56   | 216.41   | 271.97   |
| TC0700002988.mm.1  | Rcn3     | 7843.79  | 7908.71  | 6122.55  | 3430.56  | 3207.09  | 3801.83  |
| TC0600002079.mm.1  | Ptn      | 34.03    | 30.69    | 33.10    | 24.81    | 22.51    | 22.49    |
| TC0400002737.mm.1  | Lpar1    | 113.42   | 100.39   | 97.68    | 73.40    | 68.31    | 71.12    |
| TC1400002780.mm.1  | Gm2897   | 65.51    | 57.68    | 60.39    | 45.57    | 43.21    | 45.68    |
| TC0400003076.mm.1  | Mysm1    | 119.97   | 127.26   | 126.72   | 100.44   | 101.13   | 106.26   |
| TC0300001142.mm.1  | Psrc1    | 217.29   | 212.01   | 200.43   | 151.70   | 144.47   | 163.04   |
| TC1000002547.mm.1  | Gna11    | 428.81   | 398.49   | 379.02   | 297.49   | 297.30   | 310.13   |
| TC1500001819.mm.1  | Myh9     | 4717.53  | 4677.00  | 4260.81  | 2921.89  | 2739.19  | 3228.33  |
| TC1400002259.mm.1  | Elp3     | 384.70   | 383.01   | 359.96   | 305.08   | 285.51   | 305.37   |
| TC1500000351.mm.1  | Eny2     | 279.16   | 278.62   | 263.36   | 219.56   | 213.94   | 230.12   |
| TC0700002858.mm.1  | Zfp507   | 63.95    | 64.25    | 62.48    | 50.40    | 46.89    | 52.22    |
| TC1800001180.mm.1  | Ecsr     | 487.98   | 497.95   | 488.65   | 377.83   | 355.94   | 401.55   |
| TC0600001154.mm.1  | Gxylt2   | 169.75   | 156.44   | 143.45   | 108.80   | 108.78   | 104.03   |
| TC0600002024.mm.1  | Plxna4   | 58.40    | 51.09    | 53.39    | 38.15    | 39.41    | 40.59    |
| TC0600001602.mm.1  | Gprc5a   | 104.00   | 93.47    | 85.78    | 51.71    | 38.47    | 42.90    |
| TC0X00002482.mm.1  | Pls3     | 793.12   | 748.94   | 700.73   | 575.86   | 549.54   | 543.32   |
| TC0800001632.mm.1  | Ctxn1    | 635.40   | 584.06   | 642.46   | 489.45   | 461.80   | 485.18   |
| TC0700002417.mm.1  | Ehd2     | 7028.39  | 6777.10  | 5768.98  | 3762.59  | 3468.03  | 4035.43  |
| TC1200001241.mm.1  | Mark3    | 394.83   | 415.75   | 373.98   | 289.02   | 307.05   | 307.48   |
| TC1600000667.mm.1  | Ccdc80   | 17734.15 | 16951.97 | 16556.82 | 11394.74 | 10722.23 | 12680.50 |
| TC1800001012.mm.1  | Kctd1    | 77.54    | 71.94    | 77.92    | 57.06    | 54.52    | 60.13    |
| TC1800001296.mm.1  | Ccdc112  | 42.75    | 44.41    | 45.80    | 34.67    | 33.99    | 36.87    |
| TC0800001654.mm.1  | Efnb2    | 302.84   | 276.75   | 260.73   | 156.93   | 140.10   | 175.91   |
| TC0700000508.mm.1  | Fbxo17   | 74.27    | 77.94    | 68.16    | 54.73    | 50.65    | 50.46    |
| TC1100000880.mm.1  | Myh10    | 110.89   | 112.34   | 109.07   | 79.85    | 71.37    | 83.67    |
| TC0800002066.mm.1  | Dlc1     | 71.43    | 68.80    | 63.53    | 45.94    | 41.96    | 48.64    |
| TC0700001404.mm.1  | P4ha3    | 776.00   | 867.63   | 710.65   | 443.09   | 404.45   | 485.59   |
| TC1500001799.mm.1  | Rbfox2   | 1540.97  | 1522.03  | 1348.65  | 954.67   | 862.74   | 1004.09  |
| TC0200001551.mm.1  | Cd59b    | 154.05   | 144.51   | 130.29   | 96.15    | 86.61    | 95.59    |
| TC1800000714.mm.1  | Ldlrad4  | 205.27   | 203.17   | 173.09   | 99.09    | 104.27   | 120.66   |
| TC0X00001625.mm.1  | Sh3kbp1  | 377.30   | 388.76   | 360.16   | 293.22   | 271.47   | 298.68   |
| TC0X00000525.mm.1  | Fhl1     | 195.79   | 187.41   | 163.06   | 114.39   | 121.64   | 121.02   |
| TC0700001119.mm.1  | Abhd2    | 2379.84  | 2149.81  | 1881.34  | 1080.28  | 1006.15  | 1236.47  |
| TC0100002606.mm.1  | Ptpn     | 214.49   | 212.11   | 178.64   | 117.78   | 108.24   | 126.73   |
| TC0300002324.mm.1  | Syt11    | 102.96   | 94.78    | 89.07    | 69.30    | 68.78    | 71.37    |
| TC0300001081.mm.1  | Rhoc     | 21182.24 | 20393.34 | 17809.67 | 13386.65 | 12233.03 | 13096.73 |
| TC0100001252.mm.1  | Csrp1    | 3599.69  | 3581.54  | 3259.17  | 2706.48  | 2777.52  | 2675.46  |
| TC0900001293.mm.1  | Amotl2   | 125.65   | 130.46   | 117.39   | 87.58    | 81.36    | 92.98    |
| TC0200002811.mm.1  | Arfgap1  | 223.23   | 231.19   | 202.14   | 159.62   | 164.14   | 163.79   |
| TC0600002285.mm.1  | Hoxa11   | 48.56    | 48.01    | 44.53    | 37.82    | 34.74    | 35.84    |
| TC1900001464.mm.1  | Rbp4     | 275.59   | 241.16   | 261.06   | 140.49   | 168.13   | 165.78   |
| TC0400001708.mm.1  | Hspg2    | 3217.26  | 3020.69  | 2532.53  | 1570.61  | 1409.37  | 1681.86  |
| TC0200000783.mm.1  | Mbd5     | 168.56   | 180.74   | 161.61   | 127.79   | 123.16   | 133.32   |
| TC1100001115.mm.1  | Ssh2     | 613.66   | 666.12   | 585.61   | 457.70   | 458.52   | 479.25   |
| TC0X00000801.mm.1  | Tmem47   | 1844.07  | 1912.10  | 1685.23  | 1148.89  | 1032.98  | 1242.62  |
| TC1100001520.mm.1  | Copz2    | 6657.39  | 6652.19  | 5691.04  | 3673.24  | 4234.25  | 3944.81  |
| TC0900002676.mm.1  | Mapk6    | 455.21   | 441.44   | 409.99   | 339.84   | 343.72   | 351.85   |
| TC1000001868.mm.1  | Eya4     | 561.65   | 578.77   | 481.10   | 329.14   | 296.87   | 344.79   |
| TC0100001108.mm.1  |          | 367.32   | 403.50   | 381.55   | 297.24   | 261.99   | 271.79   |
| TC0800000936.mm.1  | Adgrl1   | 190.41   | 189.67   | 174.69   | 145.51   | 136.44   | 146.93   |
| TC1400002795.mm.1  | Gm8281   | 43.81    | 40.72    | 41.69    | 33.68    | 29.96    | 30.90    |
| TC1200002089.mm.1  | Pgf      | 133.96   | 115.38   | 102.87   | 68.49    | 68.14    | 67.50    |
| TC0200004750.mm.1  | Rrbp1    | 1531.46  | 1427.39  | 1341.88  | 909.31   | 783.40   | 948.71   |
| TC1100002334.mm.1  | Ehbp1    | 58.31    | 59.90    | 56.80    | 42.09    | 44.12    | 47.50    |
| TC0400004055.mm.1  | Spsb1    | 103.48   | 91.37    | 85.25    | 54.04    | 47.12    | 57.33    |
| TC0100003350.mm.1  | Tnn      | 520.87   | 494.01   | 451.21   | 264.29   | 203.48   | 268.68   |
| TC1400002849.mm.1  | Gm3696   | 39.81    | 38.07    | 38.92    | 30.27    | 30.03    | 32.95    |
| TC1800000953.mm.1  | Mkx      | 29.63    | 28.59    | 26.99    | 20.65    | 19.33    | 21.96    |
| TC1800001397.mm.1  | Smim3    | 412.00   | 350.23   | 345.68   | 205.90   | 213.76   | 241.64   |
| TC0700001991.mm.1  | Inpp5a   | 903.12   | 959.32   | 867.51   | 680.34   | 677.14   | 731.92   |

|                   |                    |           |           |           |           |           |           |
|-------------------|--------------------|-----------|-----------|-----------|-----------|-----------|-----------|
| TC0X00001322.mm.1 | Wbp5               | 5060.60   | 5012.56   | 5346.14   | 3455.06   | 2816.85   | 3388.75   |
| TC1300000087.mm.1 | Nid1               | 4169.98   | 4195.28   | 3515.87   | 2144.85   | 1817.96   | 2321.81   |
| TC0400002095.mm.1 | Mxra8              | 2296.94   | 2223.14   | 2044.54   | 1665.28   | 1681.73   | 1736.21   |
| TC1300000565.mm.1 | Ecm2               | 56.90     | 51.87     | 49.01     | 39.07     | 37.13     | 36.20     |
| TC0800002953.mm.1 | Bcar1              | 767.68    | 740.49    | 735.90    | 573.91    | 508.58    | 578.75    |
| TC1000001531.mm.1 | Lrig3              | 379.82    | 342.22    | 323.85    | 201.30    | 186.94    | 229.90    |
| TC0600000362.mm.1 | Trim24             | 226.90    | 223.24    | 214.16    | 155.27    | 142.26    | 168.45    |
| TC1500000298.mm.1 | Fzd6               | 86.51     | 74.79     | 68.65     | 45.95     | 48.93     | 45.50     |
| TC1700000955.mm.1 | Gm7334             | 2256.87   | 2209.37   | 2059.16   | 1324.08   | 1330.75   | 1575.58   |
| TC0200003560.mm.1 | Nr4a2              | 82.82     | 81.42     | 74.37     | 59.52     | 58.50     | 53.17     |
| TC1600001528.mm.1 | Kalrn              | 54.92     | 54.28     | 50.88     | 41.95     | 42.63     | 44.82     |
| TC1400002848.mm.1 | Gm10406            | 64.13     | 59.70     | 57.81     | 45.08     | 43.22     | 47.76     |
| TC1100002301.mm.1 | Slc1a4             | 326.24    | 302.26    | 274.90    | 193.62    | 168.87    | 197.58    |
| TC0700000038.mm.1 | Brsk1              | 59.96     | 55.42     | 52.06     | 41.98     | 38.56     | 40.22     |
| TC1900001163.mm.1 | Dtx4               | 248.63    | 271.61    | 256.29    | 173.82    | 147.04    | 177.88    |
| TC0400001510.mm.1 | Rnf19b             | 757.64    | 720.89    | 634.18    | 488.75    | 484.97    | 492.67    |
| TC0100002690.mm.1 | Pid1               | 126.15    | 134.80    | 134.69    | 104.32    | 99.59     | 109.17    |
| TC0100003443.mm.1 | Dcaf6              | 300.59    | 289.52    | 276.83    | 204.20    | 193.52    | 224.12    |
| TC0400002854.mm.1 | Tle1               | 93.17     | 100.12    | 87.92     | 69.18     | 66.77     | 72.35     |
| TC0200003806.mm.1 | Fkbp7              | 1955.34   | 2251.50   | 1933.16   | 1140.53   | 1088.13   | 1343.00   |
| TC0100000364.mm.1 | Tmeff2             | 58.24     | 58.22     | 48.54     | 36.08     | 35.43     | 36.86     |
| TC0900002054.mm.1 | Tbrg1              | 4475.15   | 4403.31   | 4013.50   | 2988.68   | 3008.49   | 3320.77   |
| TC1500000647.mm.1 | Kctd17             | 462.35    | 455.37    | 377.92    | 282.21    | 261.79    | 269.68    |
| TC0100001821.mm.1 | Ptpn14             | 466.59    | 455.31    | 414.84    | 318.29    | 310.09    | 343.66    |
| TC1200002493.mm.1 | Wdr60              | 51.93     | 49.82     | 51.55     | 43.81     | 39.85     | 40.98     |
| TC0100001193.mm.1 | Dstyk              | 104.71    | 106.24    | 94.03     | 77.87     | 73.45     | 77.33     |
| TC0100002261.mm.1 | Fhl2               | 380.02    | 360.00    | 343.57    | 289.17    | 271.78    | 262.04    |
| TC1300002119.mm.1 | Golm1              | 309.23    | 277.22    | 296.28    | 197.84    | 205.81    | 225.86    |
| TC0900001900.mm.1 | Acp5               | 271.39    | 253.28    | 240.12    | 184.06    | 186.91    | 199.90    |
| TC0700003420.mm.1 | Tjp1               | 325.99    | 332.22    | 305.33    | 213.91    | 169.25    | 202.22    |
| TC0400002665.mm.1 | Abca1              | 5357.50   | 5542.41   | 4853.74   | 3392.95   | 3248.23   | 3805.52   |
| TC0300001958.mm.1 | Setd7              | 294.60    | 297.72    | 246.27    | 155.06    | 137.31    | 171.49    |
| TC0500003738.mm.1 | Pcolce             | 1393.29   | 1321.24   | 1209.51   | 938.38    | 898.19    | 986.75    |
| TC0200000518.mm.1 | Sptan1             | 930.09    | 942.96    | 907.89    | 714.77    | 704.16    | 783.69    |
| TC1100003063.mm.1 | Chrn1              | 46.98     | 47.11     | 42.40     | 36.15     | 35.07     | 33.96     |
| TC0200001230.mm.1 | Tnks1bp1           | 146.25    | 138.72    | 129.90    | 106.46    | 96.14     | 103.45    |
| TC1400000263.mm.1 | Arf4               | 780.08    | 740.87    | 647.01    | 460.83    | 450.57    | 500.97    |
| TC1400000851.mm.1 | Spata13            | 48.08     | 43.90     | 44.32     | 34.72     | 34.19     | 37.06     |
| TC0700003434.mm.1 | Lrrk1              | 240.17    | 232.07    | 214.31    | 151.84    | 136.87    | 164.52    |
| TC1100000544.mm.1 | Hnrnp1             | 681.18    | 725.90    | 663.49    | 487.57    | 484.68    | 546.00    |
| TC0600000768.mm.1 | Prdm5              | 94.55     | 98.86     | 91.90     | 73.39     | 71.84     | 79.19     |
| TC1500000592.mm.1 | Scx                | 81.67     | 76.95     | 68.81     | 48.20     | 53.31     | 52.34     |
| TC0500000734.mm.1 | Srp72              | 3481.58   | 3555.91   | 3188.20   | 2622.78   | 2469.64   | 2681.97   |
| TC0600002799.mm.1 | Uba3               | 2485.08   | 2442.35   | 2199.80   | 1820.56   | 1740.35   | 1843.31   |
| TC0500003576.mm.1 | Baiap211           | 180.41    | 194.07    | 171.95    | 132.22    | 110.36    | 118.31    |
| TC1100003236.mm.1 | Fam101b            | 985.72    | 888.79    | 767.85    | 394.54    | 352.04    | 482.20    |
| TC1400001303.mm.1 | Mbnl2              | 10721.98  | 11906.36  | 9422.36   | 6042.57   | 5714.56   | 6747.24   |
| TC0100000916.mm.1 | Gpc1               | 294.49    | 265.41    | 250.56    | 179.75    | 155.24    | 181.31    |
| TC1700001805.mm.1 | Glo1               | 536.39    | 534.07    | 438.29    | 313.03    | 324.05    | 327.42    |
| TC0700002078.mm.1 | Lsp1               | 223.14    | 236.39    | 207.56    | 150.36    | 127.74    | 151.95    |
| TC0300001760.mm.1 | Fndc3b             | 7365.57   | 7475.17   | 6539.93   | 4578.69   | 4117.46   | 4969.96   |
| TC1300001500.mm.1 | Cdk13              | 2126.99   | 2297.95   | 2046.48   | 1586.26   | 1691.94   | 1694.24   |
| TC0100001351.mm.1 | Ivns1abp           | 2150.33   | 2143.20   | 1925.02   | 1409.93   | 1331.67   | 1550.04   |
| TC0700003552.mm.1 | Mfge8              | 5346.14   | 5098.47   | 4631.22   | 3553.35   | 3144.90   | 3570.70   |
| TC1600001319.mm.1 | Gp1bb; Sept5       | 675.80    | 607.39    | 545.70    | 391.94    | 338.45    | 381.94    |
| TC1900000186.mm.1 | Fads3              | 15332.15  | 15479.40  | 13914.80  | 11774.47  | 11011.59  | 11713.65  |
| TC1700000009.mm.1 | Tiam2              | 79.48     | 73.88     | 70.77     | 56.09     | 47.86     | 51.56     |
| TC1300001036.mm.1 | Serinc5            | 512.58    | 498.05    | 437.00    | 282.81    | 298.59    | 336.40    |
| TC0200002410.mm.1 | Src                | 144.96    | 140.83    | 136.04    | 105.16    | 99.39     | 114.04    |
| TC0600003264.mm.1 | Klra2              | 160.10    | 154.27    | 134.94    | 101.61    | 103.49    | 91.48     |
| TC1300002326.mm.1 | Cast               | 1045.50   | 1046.38   | 994.48    | 802.82    | 720.78    | 819.42    |
| TC1100002092.mm.1 | Smtn               | 193.75    | 187.54    | 165.32    | 131.51    | 123.88    | 132.87    |
| TC1200000110.mm.1 | Nbas               | 438.24    | 436.64    | 378.79    | 304.65    | 281.69    | 300.70    |
| TC0300002094.mm.1 | Ssr3               | 2934.30   | 2742.71   | 2710.75   | 2074.46   | 1702.24   | 1870.22   |
| TC0900000871.mm.1 | Car12              | 33.34     | 29.28     | 29.76     | 23.42     | 23.26     | 21.84     |
| TC0700004201.mm.1 | Cdr2               | 412.12    | 420.05    | 362.24    | 278.25    | 277.38    | 298.34    |
| TC0500002651.mm.1 | Igfbp7             | 162211.50 | 156024.50 | 148128.20 | 113090.00 | 105817.30 | 122166.30 |
| TC1300002061.mm.1 | Pdlim7;<br>Mir6945 | 542.36    | 520.86    | 439.99    | 323.24    | 286.43    | 320.01    |
| TC0200004264.mm.1 | Rcn1               | 718.02    | 683.16    | 591.77    | 372.81    | 346.18    | 430.63    |
| TC1300002481.mm.1 | Hexb               | 60879.91  | 56774.76  | 54980.69  | 39960.72  | 35256.10  | 42147.66  |
| TC1500001181.mm.1 | Gm2310             | 1085.58   | 1184.26   | 1341.27   | 631.61    | 701.29    | 772.82    |
| TC1400002844.mm.1 | Gm3591             | 89.38     | 79.61     | 80.50     | 60.04     | 50.12     | 55.90     |
| TC0200003837.mm.1 | Nckap1             | 700.98    | 648.64    | 620.83    | 435.44    | 387.35    | 470.05    |



|                   |                              |          |          |          |          |          |          |
|-------------------|------------------------------|----------|----------|----------|----------|----------|----------|
| TC0600001606.mm.1 | Emp1                         | 40625.39 | 39728.44 | 35870.41 | 24751.32 | 27482.08 | 28541.45 |
| TC0800002300.mm.1 | Palld                        | 265.16   | 262.61   | 233.79   | 162.62   | 159.53   | 186.54   |
| TC1000000937.mm.1 | Chst11                       | 2230.43  | 2065.27  | 1677.14  | 924.64   | 657.64   | 902.95   |
| TC0300002023.mm.1 | Tm4sf1                       | 687.97   | 647.99   | 565.37   | 406.10   | 420.40   | 442.98   |
| TC1500001656.mm.1 | Sla                          | 111.39   | 106.28   | 97.31    | 80.11    | 76.73    | 81.67    |
| TC1500001511.mm.1 | Ext1                         | 2042.23  | 1886.94  | 1700.46  | 1131.42  | 1295.87  | 1253.25  |
| TC0300000124.mm.1 | Mtfr1                        | 315.81   | 317.23   | 297.82   | 252.13   | 224.78   | 221.66   |
| TC0500000534.mm.1 | Anapc4                       | 356.54   | 365.00   | 341.54   | 276.29   | 278.23   | 301.70   |
| TC1900000749.mm.1 | Mxi1                         | 77.06    | 72.78    | 74.54    | 55.75    | 58.29    | 62.68    |
| TC0900002944.mm.1 | Ppp2r3a                      | 64.60    | 66.76    | 60.29    | 50.64    | 50.24    | 53.08    |
| TC0700004592.mm.1 | Tnfrsf22                     | 1215.63  | 1337.30  | 1272.79  | 878.12   | 840.50   | 986.68   |
| TC1100002131.mm.1 | Kremen1                      | 249.90   | 223.89   | 219.45   | 163.11   | 142.82   | 165.12   |
| TC1600000443.mm.1 | Pcyt1a                       | 312.60   | 285.71   | 315.10   | 242.46   | 220.30   | 236.50   |
| TC1100001694.mm.1 | Fzd2                         | 314.44   | 324.95   | 283.65   | 215.05   | 190.73   | 221.79   |
| TC1200001523.mm.1 | Gm10330;<br>LOC10086160<br>1 | 181.07   | 169.44   | 165.35   | 100.02   | 82.16    | 110.72   |
| TC0200000741.mm.1 | Arhgap15                     | 75.01    | 80.07    | 69.45    | 56.40    | 58.51    | 55.64    |
| TC0900001067.mm.1 | Senp6                        | 259.77   | 268.33   | 251.07   | 208.25   | 193.71   | 215.96   |
| TC0300001521.mm.1 | Adgrl4                       | 65.70    | 70.65    | 62.45    | 50.33    | 46.92    | 51.77    |
| TC1300001654.mm.1 | Lrrc16a                      | 93.18    | 92.94    | 84.12    | 64.33    | 68.05    | 71.45    |
| TC1200000074.mm.1 | Wdr35                        | 141.88   | 147.90   | 119.20   | 86.56    | 84.87    | 91.84    |
| TC0400000052.mm.1 | Rab2a                        | 37008.41 | 38034.65 | 37921.61 | 30146.61 | 26590.82 | 30117.57 |
| TC0600001622.mm.1 | Atf7ip                       | 1958.95  | 2092.43  | 2145.27  | 1565.15  | 1549.61  | 1704.38  |
| TC0600003601.mm.1 | Foxp1                        | 243.37   | 253.89   | 224.86   | 176.07   | 164.61   | 186.66   |
| TC0400003581.mm.1 | Azin2                        | 94.73    | 98.24    | 86.89    | 74.29    | 68.41    | 71.17    |
| TC1800000314.mm.1 | Paip2                        | 2314.10  | 2328.52  | 2360.44  | 1836.12  | 1590.04  | 1823.17  |
| TC0200001881.mm.1 | Dut                          | 98.94    | 110.92   | 104.61   | 74.03    | 81.77    | 81.25    |
| TC0700001684.mm.1 | Nucb2                        | 2119.12  | 2033.86  | 1966.07  | 1523.73  | 1353.61  | 1582.78  |
| TC0300001229.mm.1 | Alg14                        | 1749.63  | 1730.83  | 1598.57  | 1170.00  | 1116.73  | 1315.27  |
| TC0500002508.mm.1 | Apbb2                        | 1508.86  | 1524.01  | 1337.96  | 1115.21  | 1069.48  | 1129.66  |
| TC1300001861.mm.1 | Nedd9                        | 301.79   | 286.69   | 289.51   | 173.17   | 143.98   | 194.90   |
| TC0500001894.mm.1 | Cyp51                        | 495.04   | 496.02   | 437.54   | 287.41   | 270.78   | 336.60   |
| TC0800000088.mm.1 | Col4a2                       | 95.55    | 95.43    | 85.20    | 66.50    | 62.68    | 71.10    |
| TC1700001521.mm.1 | Has1                         | 61.25    | 62.53    | 61.26    | 44.02    | 51.11    | 46.14    |
| TC1100002550.mm.1 | Ccng1                        | 83777.48 | 89389.80 | 70737.13 | 50196.70 | 48661.77 | 53952.15 |
| TC0900000035.mm.1 | Pdgfd                        | 213.56   | 227.65   | 194.98   | 134.24   | 118.48   | 146.86   |
| TC0900002613.mm.1 | Tcf12                        | 391.59   | 394.14   | 369.21   | 305.71   | 269.54   | 302.46   |
| TC0900002921.mm.1 | Mras                         | 405.98   | 454.81   | 419.88   | 326.24   | 294.60   | 329.66   |
| TC0200004219.mm.1 | Cd44                         | 2289.06  | 2276.46  | 2088.45  | 1578.36  | 1369.86  | 1636.98  |
| TC0200003670.mm.1 | Galnt3                       | 76.64    | 77.08    | 70.00    | 54.12    | 55.66    | 60.37    |
| TC0100001605.mm.1 | Copa                         | 18314.44 | 18186.16 | 17465.74 | 14412.24 | 13691.99 | 15342.57 |
| TC0500001106.mm.1 | Pcgf3                        | 496.17   | 510.07   | 465.88   | 344.50   | 359.02   | 395.16   |
| TC1100000494.mm.1 | Trim7                        | 46.77    | 42.87    | 47.13    | 34.31    | 37.09    | 33.26    |
| TC1400000507.mm.1 | Samd4                        | 142.70   | 132.87   | 123.50   | 93.08    | 93.58    | 102.99   |
| TC1000000224.mm.1 | Epb41l2                      | 1388.36  | 1505.02  | 1310.45  | 997.98   | 935.15   | 1070.11  |
| TC1500001465.mm.1 | Nudcd1                       | 309.94   | 312.18   | 291.19   | 208.51   | 206.91   | 241.68   |
| TC0100003096.mm.1 | Atp2b4;<br>Mir6903           | 213.89   | 225.85   | 198.97   | 153.17   | 135.61   | 158.28   |
| TC1100003217.mm.1 | Hic1                         | 30.31    | 32.98    | 30.55    | 25.86    | 23.47    | 23.36    |
| TC1100000081.mm.1 | Aebp1                        | 12656.21 | 12026.50 | 12029.09 | 10054.00 | 8709.39  | 9362.05  |
| TC0X00000709.mm.1 | Gdi1                         | 919.67   | 886.91   | 866.60   | 632.16   | 645.86   | 730.19   |
| TC1100000601.mm.1 | Aff4                         | 1965.77  | 2080.33  | 1863.92  | 1547.12  | 1413.08  | 1560.38  |
| TC1900001130.mm.1 | Ms4a14                       | 793.97   | 1053.62  | 733.12   | 327.97   | 373.83   | 433.75   |
| TC0700001660.mm.1 | Arntl                        | 284.04   | 275.25   | 266.78   | 199.28   | 162.19   | 194.06   |
| TC0500003169.mm.1 | Tpcn1                        | 628.56   | 616.92   | 557.48   | 462.75   | 425.29   | 467.26   |
| TC0900001295.mm.1 | Ryk                          | 4928.57  | 4902.76  | 4345.87  | 3143.06  | 2821.59  | 3425.14  |
| TC0X00000169.mm.1 | Gpr34                        | 90.28    | 81.93    | 64.38    | 40.62    | 38.40    | 44.17    |
| TC1500001570.mm.1 | Fbxo32                       | 127.08   | 111.36   | 110.30   | 86.48    | 82.79    | 76.07    |
| TC1700002324.mm.1 | Ptprs                        | 285.99   | 289.03   | 252.13   | 187.19   | 174.71   | 205.00   |
| TC1900000787.mm.1 | Tcf7l2                       | 251.74   | 254.45   | 230.91   | 198.83   | 180.90   | 194.77   |
| TC0200002026.mm.1 | Prnd; Prnp;<br>Prn; PRND     | 142.85   | 146.68   | 146.21   | 125.91   | 112.91   | 113.97   |
| TC1100001891.mm.1 | Cdr2l                        | 466.11   | 462.42   | 403.55   | 201.09   | 240.02   | 278.62   |
| TC1700000274.mm.1 | Zfp52                        | 706.61   | 780.56   | 708.66   | 396.58   | 310.41   | 444.62   |
| TC0900001675.mm.1 | Ccr5                         | 997.26   | 966.92   | 845.75   | 680.09   | 665.30   | 703.45   |
| TC1400002689.mm.1 | Slitrk6                      | 72.41    | 65.99    | 52.93    | 34.10    | 35.36    | 37.57    |
| TC0X00001056.mm.1 | Magee1                       | 51.39    | 50.41    | 44.14    | 36.57    | 34.14    | 36.24    |
| TC0700004171.mm.1 | Syt17                        | 29.21    | 27.81    | 26.10    | 22.81    | 21.05    | 21.78    |
| TC0300000017.mm.1 | Zfhx4                        | 108.19   | 123.11   | 98.41    | 71.93    | 69.11    | 75.99    |
| TC0500001724.mm.1 | Fscn1                        | 5563.23  | 5282.57  | 4673.22  | 3221.12  | 2600.07  | 3286.19  |
| TC0100000244.mm.1 | Cnnm4                        | 187.75   | 186.63   | 180.44   | 157.59   | 148.41   | 139.35   |
| TC0X00001383.mm.1 | Mid2                         | 104.66   | 101.21   | 87.53    | 67.46    | 71.53    | 69.91    |
| TC0900000858.mm.1 | Csnk1g1                      | 345.29   | 384.67   | 333.72   | 260.53   | 235.41   | 265.63   |

|                   |                   |           |           |           |           |          |           |
|-------------------|-------------------|-----------|-----------|-----------|-----------|----------|-----------|
| TC0700002759.mm.1 | Appl1             | 76.01     | 83.81     | 67.36     | 49.12     | 47.38    | 52.88     |
| TC0500002486.mm.1 | Ugdh              | 581.61    | 651.38    | 528.98    | 404.36    | 387.09   | 416.99    |
| TC0900001349.mm.1 | Pcbp4             | 729.13    | 653.02    | 590.92    | 457.16    | 402.08   | 437.48    |
| TC0200004107.mm.1 | Slc39a13          | 328.90    | 310.19    | 277.40    | 223.43    | 203.88   | 223.17    |
| TC0100000216.mm.1 | Dst               | 428.16    | 454.24    | 406.09    | 289.45    | 274.95   | 329.67    |
| TC1100003667.mm.1 | Fbxl20            | 155.28    | 147.96    | 143.81    | 118.76    | 110.04   | 123.70    |
| TC0800001078.mm.1 | Lpcat2            | 901.94    | 981.98    | 818.76    | 626.11    | 629.38   | 674.33    |
| TC1600000353.mm.1 | Lpp               | 843.74    | 930.63    | 749.50    | 518.13    | 530.54   | 589.79    |
| TC1400001315.mm.1 | Farp1             | 903.98    | 828.04    | 733.91    | 547.56    | 476.55   | 552.21    |
| TC0200001006.mm.1 | Dhrs9             | 439.72    | 418.36    | 364.50    | 263.62    | 242.88   | 287.73    |
| TC1000001091.mm.1 | Gm4184            | 135758.00 | 128151.40 | 137639.20 | 105445.90 | 93825.63 | 107057.10 |
| TC0500003054.mm.1 | Ssh1              | 346.11    | 367.90    | 327.61    | 268.71    | 264.73   | 286.61    |
| TC0X00001372.mm.1 | Tbcd8b            | 254.06    | 282.99    | 229.57    | 154.17    | 126.80   | 161.58    |
| TC1100000720.mm.1 | Wnt9a             | 54.03     | 57.72     | 46.38     | 34.16     | 36.97    | 34.76     |
| TC0300002822.mm.1 | Snx7              | 521.68    | 581.10    | 507.10    | 342.93    | 318.41   | 392.57    |
| TC1400001517.mm.1 | Gm2237            | 57.90     | 59.17     | 60.95     | 45.50     | 38.36    | 44.92     |
| TC1000001138.mm.1 | Ntn4              | 53.97     | 52.56     | 46.40     | 35.23     | 37.99    | 38.56     |
| TC1000002729.mm.1 | Nudt4             | 2830.89   | 2772.08   | 2670.68   | 2090.99   | 1857.15  | 2193.39   |
| TC0400002449.mm.1 | B4galt1           | 7791.45   | 7427.56   | 6981.04   | 4830.52   | 4654.41  | 5649.56   |
| TC0200004512.mm.1 | Slc30a4           | 359.58    | 337.40    | 336.25    | 208.27    | 221.10   | 261.23    |
| TC0100000351.mm.1 | Wdr75             | 930.58    | 901.07    | 824.47    | 681.91    | 631.13   | 702.38    |
| TC1900001505.mm.1 | Tm9sf3            | 4271.40   | 4247.48   | 4151.96   | 3223.64   | 2982.87  | 3500.83   |
| TC1100000730.mm.1 | Mpr1p             | 1034.32   | 960.11    | 930.29    | 728.86    | 681.54   | 782.15    |
| TC1400001487.mm.1 | Rarb              | 31.14     | 31.34     | 33.36     | 24.00     | 24.66    | 20.82     |
| TC1800000564.mm.1 | Gramd3            | 89.71     | 87.30     | 78.09     | 63.47     | 60.95    | 66.93     |
| TC0100001615.mm.1 | Slamf9            | 240.22    | 230.00    | 188.47    | 143.01    | 137.97   | 144.34    |
| TC1300001781.mm.1 | Tubb2b            | 1476.59   | 1645.55   | 1329.90   | 948.54    | 798.38   | 969.48    |
| TC0300000923.mm.1 | Otud7b            | 74.56     | 82.73     | 80.62     | 54.88     | 56.55    | 63.48     |
| TC1200001704.mm.1 | Prkd1             | 225.56    | 260.99    | 219.79    | 117.53    | 116.31   | 154.18    |
| TC1000002594.mm.1 | Ckap4             | 818.69    | 786.70    | 764.95    | 528.83    | 544.53   | 632.01    |
| TC0700002644.mm.1 | Axl               | 4197.23   | 4071.76   | 3711.62   | 3055.94   | 2740.66  | 3083.48   |
| TC1000000301.mm.1 | Frk               | 177.20    | 206.12    | 156.59    | 88.94     | 77.83    | 106.57    |
| TC1600001750.mm.1 | Tfg               | 1845.44   | 1926.88   | 1689.52   | 1479.60   | 1415.82  | 1392.82   |
| TC1200001436.mm.1 | Ddx1              | 6696.47   | 7202.69   | 6448.41   | 4819.32   | 4862.74  | 5475.03   |
| TC0500003482.mm.1 | Pdgfa             | 170.03    | 158.97    | 149.21    | 124.27    | 122.64   | 130.30    |
| TC0900000550.mm.1 | Sik3              | 668.84    | 659.34    | 597.54    | 516.34    | 470.72   | 505.82    |
| TC0600001793.mm.1 | Tfpi2             | 169.34    | 125.13    | 111.81    | 62.33     | 45.91    | 59.43     |
| TC1000003094.mm.1 | Mettl21b          | 97.89     | 91.42     | 82.10     | 65.25     | 55.86    | 62.74     |
| TC1700002541.mm.1 | Fam98a            | 408.79    | 436.77    | 442.34    | 305.30    | 264.50   | 324.80    |
| TC1600001053.mm.1 | Sim2              | 73.01     | 68.78     | 75.81     | 58.40     | 50.56    | 55.15     |
| TC0400002945.mm.1 | Ttc39b            | 425.33    | 448.58    | 390.39    | 275.98    | 263.63   | 318.23    |
| TC0700003714.mm.1 | Prss23            | 251.75    | 249.27    | 211.58    | 144.49    | 161.28   | 168.77    |
| TC0200001681.mm.1 | Fmn1              | 542.41    | 607.57    | 585.26    | 436.64    | 395.36   | 455.77    |
| TC1600002136.mm.1 | Brwd1             | 120.47    | 126.22    | 117.14    | 92.29     | 89.62    | 101.99    |
| TC1200002138.mm.1 | Gm5662            | 19.78     | 20.51     | 17.77     | 14.98     | 15.25    | 15.28     |
| TC0600003185.mm.1 | Tspan9            | 105.00    | 99.51     | 86.58     | 68.95     | 62.02    | 68.87     |
| TC0100001190.mm.1 | Nuak2             | 128.37    | 129.89    | 133.50    | 95.84     | 95.44    | 109.89    |
| TC1700000752.mm.1 | Zfp57             | 54.80     | 61.19     | 52.99     | 41.81     | 44.74    | 42.95     |
| TC0900001845.mm.1 | Olfm2             | 23.89     | 21.18     | 23.37     | 17.58     | 17.22    | 18.68     |
| TC0900002037.mm.1 | Stt3a             | 31236.15  | 27954.30  | 27019.23  | 21809.17  | 21813.52 | 22881.31  |
| TC0300001232.mm.1 | Cnn3              | 30592.94  | 39338.02  | 31691.41  | 14250.24  | 18496.06 | 19176.44  |
| TC0800001928.mm.1 | Hook3             | 397.03    | 437.45    | 398.91    | 292.62    | 258.00   | 313.35    |
| TC0100001581.mm.1 | Adamts4           | 439.66    | 455.22    | 332.51    | 163.00    | 137.96   | 211.98    |
| TC1300002609.mm.1 | Rnf180            | 140.45    | 147.85    | 136.53    | 108.32    | 100.27   | 116.40    |
| TC0200001203.mm.1 | Itgav             | 2433.93   | 2396.78   | 2127.35   | 1552.62   | 1420.36  | 1732.89   |
| TC0500000856.mm.1 | Ereg              | 205.07    | 191.82    | 169.27    | 111.33    | 102.24   | 130.59    |
| TC0600001002.mm.1 | Gfpt1             | 305.86    | 280.96    | 256.47    | 215.31    | 208.27   | 209.90    |
| TC0900002320.mm.1 | Dmxl2             | 474.12    | 494.66    | 436.49    | 333.73    | 350.17   | 377.43    |
| TC0700001368.mm.1 | Lrrc32            | 7554.83   | 7383.08   | 6043.65   | 4521.38   | 4724.18  | 4103.86   |
| TC1500002186.mm.1 | Fkbp11            | 97.50     | 86.44     | 85.54     | 63.35     | 56.85    | 67.74     |
| TC1200001877.mm.1 | Map4k5            | 507.12    | 538.41    | 451.77    | 333.20    | 296.59   | 359.53    |
| TC0400000519.mm.1 | Tgfb1             | 1114.94   | 1256.21   | 1070.57   | 740.34    | 720.44   | 858.22    |
| TC0500000868.mm.1 | Uso1              | 2015.25   | 2058.35   | 1739.74   | 1229.38   | 1159.33  | 1408.77   |
| TC0700004604.mm.1 | Ctt1              | 782.07    | 787.37    | 699.10    | 513.60    | 448.37   | 557.04    |
| TC0300000210.mm.1 | Skil              | 957.66    | 930.89    | 942.72    | 520.17    | 407.25   | 604.25    |
| TC0100000393.mm.1 | Coq10b            | 285.16    | 303.30    | 247.33    | 185.34    | 185.88   | 204.16    |
| TC1000000386.mm.1 | Sec63             | 1375.47   | 1406.30   | 1320.95   | 1008.94   | 837.82   | 1021.50   |
| TC0100003477.mm.1 | Uck2              | 249.99    | 195.90    | 182.06    | 93.05     | 62.67    | 97.27     |
| TC0700001372.mm.1 | Prkr1r            | 139.59    | 132.88    | 148.17    | 104.74    | 104.34   | 116.30    |
| TC1200000462.mm.1 | Srp54b;<br>Srp54c | 7108.90   | 7641.20   | 7048.54   | 4216.86   | 4297.70  | 5408.49   |
| TC1400002072.mm.1 | Efs               | 71.85     | 69.47     | 63.72     | 54.94     | 47.75    | 49.85     |
| TC0X00000916.mm.1 | Msn               | 15162.98  | 15808.91  | 14954.33  | 11383.92  | 11775.08 | 13046.99  |
| TC1400002487.mm.1 | Rgcc              | 43.94     | 36.03     | 37.04     | 26.56     | 23.78    | 27.37     |

|                   |                   |          |          |          |          |          |          |
|-------------------|-------------------|----------|----------|----------|----------|----------|----------|
| TC0800002589.mm.1 | Nfix              | 2650.55  | 2672.87  | 2444.95  | 2097.61  | 1853.63  | 2056.31  |
| TC1400001393.mm.1 | Gm3500            | 65.86    | 60.87    | 62.14    | 46.95    | 48.75    | 53.25    |
| TC1100002314.mm.1 | Lgalsl            | 1337.10  | 1226.19  | 1237.22  | 909.39   | 809.60   | 986.15   |
| TC1100000794.mm.1 | Ttc19             | 226.42   | 240.44   | 191.17   | 143.97   | 148.43   | 153.84   |
| TC0800001481.mm.1 | Zfpm1             | 141.22   | 125.34   | 115.19   | 85.88    | 80.35    | 92.54    |
| TC0X00003108.mm.1 | Ammecr1           | 2239.69  | 2293.90  | 2069.13  | 1324.70  | 986.90   | 1377.81  |
| TC0200005089.mm.1 | Jph2              | 55.08    | 54.48    | 49.00    | 42.86    | 41.97    | 43.59    |
| TC1000002580.mm.1 | Slc41a2           | 2418.85  | 2418.87  | 2097.41  | 1596.27  | 1668.60  | 1793.55  |
| TC0900000686.mm.1 | Cspg4             | 145.40   | 142.27   | 127.32   | 80.99    | 89.05    | 102.13   |
| TC1400000517.mm.1 | Ktn1              | 100.46   | 115.54   | 110.34   | 77.88    | 75.30    | 86.14    |
| TC0400002717.mm.1 | Ptpn3             | 38.48    | 37.79    | 37.30    | 29.80    | 29.48    | 33.15    |
| TC0600002127.mm.1 | Braf              | 248.78   | 292.47   | 246.10   | 183.87   | 173.25   | 195.25   |
| TC0600000850.mm.1 | Ggcx              | 483.50   | 450.69   | 387.72   | 298.74   | 291.83   | 316.59   |
| TC0900001903.mm.1 | Zfp599            | 74.88    | 69.81    | 68.32    | 55.83    | 46.85    | 52.98    |
| TC1100000440.mm.1 | Rnf145            | 626.16   | 650.29   | 571.19   | 428.67   | 357.94   | 442.84   |
| TC1100000831.mm.1 | Hs3st3a1          | 48.38    | 50.98    | 44.59    | 36.62    | 35.46    | 31.26    |
| TC0600002773.mm.1 | Lrig1             | 91.16    | 75.68    | 75.73    | 57.21    | 54.79    | 58.66    |
| TC1100002227.mm.1 | Grb10             | 564.73   | 611.80   | 535.71   | 413.35   | 392.73   | 453.93   |
| TC0900001232.mm.1 | Rbp1              | 320.65   | 246.36   | 235.00   | 157.36   | 133.35   | 153.04   |
| TC0300001255.mm.1 | Sec24d            | 2863.42  | 2697.57  | 2373.55  | 1686.64  | 1537.74  | 1895.93  |
| TC1100001361.mm.1 | Vezf1             | 2061.12  | 1890.53  | 1834.16  | 1421.51  | 1329.69  | 1545.43  |
| TC0700001669.mm.1 | Pde3b             | 323.79   | 330.18   | 311.78   | 199.31   | 148.75   | 206.90   |
| TC1300000362.mm.1 | Serpinb6b         | 88.83    | 79.09    | 92.43    | 68.34    | 62.04    | 62.66    |
| TC0700002148.mm.1 | Cdc42ep5          | 247.69   | 229.60   | 188.93   | 147.94   | 132.02   | 136.77   |
| TC1900000082.mm.1 | Ltbp3             | 175.73   | 161.59   | 148.40   | 119.13   | 104.68   | 119.37   |
| TC0500001615.mm.1 | Plod3; Mir702     | 2965.65  | 2898.70  | 2548.13  | 2039.31  | 1919.66  | 2175.00  |
| TC1900000154.mm.1 | Stx5a;<br>Mir6992 | 215.91   | 214.55   | 195.31   | 170.89   | 156.12   | 169.77   |
| TC1500001876.mm.1 | Ddx17             | 2221.04  | 2423.42  | 2102.41  | 1744.56  | 1580.02  | 1754.70  |
| TC0200005471.mm.1 | Ak1               | 1613.61  | 1760.13  | 1677.53  | 1060.58  | 1201.91  | 1309.36  |
| TC0800000916.mm.1 | Tbc1d9            | 963.71   | 908.26   | 870.00   | 643.18   | 621.04   | 736.80   |
| TC0300001342.mm.1 | Dkk2              | 235.54   | 211.41   | 188.29   | 147.73   | 124.55   | 139.36   |
| TC1700001158.mm.1 | Slc30a6           | 570.99   | 607.72   | 504.86   | 413.89   | 401.14   | 426.37   |
| TC1600001976.mm.1 | Adamts5           | 6458.97  | 6462.11  | 5501.18  | 3861.35  | 3286.60  | 4246.41  |
| TC0100003505.mm.1 | Hsd17b7           | 283.49   | 259.62   | 212.05   | 161.76   | 148.27   | 158.28   |
| TC0800001566.mm.1 | Ntpcr             | 455.91   | 449.38   | 385.43   | 268.99   | 303.79   | 314.42   |
| TC0700002830.mm.1 | 4931406P16Ri<br>k | 517.16   | 447.29   | 416.24   | 315.80   | 269.67   | 313.24   |
| TC0100003715.mm.1 | Capn2             | 4668.24  | 4664.75  | 4091.90  | 3258.13  | 3262.13  | 3587.88  |
| TC1500002289.mm.1 | Rarg              | 97.52    | 98.62    | 88.07    | 73.42    | 74.60    | 79.20    |
| TC0200005030.mm.1 | Tgm2              | 1103.33  | 1086.08  | 938.41   | 765.94   | 745.06   | 809.00   |
| TC0700004595.mm.1 | Osbpl5            | 197.21   | 200.65   | 179.41   | 143.08   | 159.42   | 149.65   |
| TC0500002760.mm.1 | Scarb2            | 905.20   | 953.24   | 863.71   | 663.37   | 585.84   | 711.57   |
| TC0700001879.mm.1 | Tgfb1i1           | 663.16   | 633.22   | 590.45   | 503.70   | 435.81   | 482.38   |
| TC1500000041.mm.1 | Rictor            | 760.47   | 855.77   | 692.74   | 457.13   | 408.59   | 530.83   |
| TC1000000193.mm.1 | Vnn1              | 53.49    | 40.27    | 48.70    | 30.74    | 30.09    | 30.84    |
| TC1300001835.mm.1 | Txndc5            | 3538.36  | 3547.74  | 3329.98  | 2421.19  | 2167.55  | 2725.14  |
| TC1400001233.mm.1 | Gm6280            | 23.34    | 21.06    | 21.68    | 18.20    | 17.36    | 16.01    |
| TC0600002935.mm.1 | Sec13             | 1244.81  | 1240.58  | 1078.92  | 887.83   | 814.12   | 919.87   |
| TC1600002168.mm.1 | Vasn              | 165.48   | 165.95   | 160.75   | 139.74   | 119.14   | 127.83   |
| TC0700001086.mm.1 | Akap13            | 279.29   | 303.63   | 274.24   | 197.24   | 179.49   | 222.94   |
| TC0200002589.mm.1 | Snai1             | 154.85   | 127.52   | 131.44   | 82.82    | 98.00    | 94.61    |
| TC0200000514.mm.1 | Cercam            | 406.31   | 375.24   | 346.80   | 296.50   | 285.44   | 299.05   |
| TC1200000156.mm.1 | Gm3944            | 35.76    | 34.66    | 36.54    | 31.17    | 28.19    | 27.57    |
| TC0300000765.mm.1 | Pbxip1            | 96.64    | 94.02    | 85.88    | 73.79    | 77.81    | 74.07    |
| TC1500000297.mm.1 | Baalc             | 24.92    | 29.12    | 24.90    | 17.29    | 18.16    | 20.14    |
| TC0800002169.mm.1 | Stox2             | 73.00    | 66.73    | 58.46    | 46.82    | 42.26    | 46.99    |
| TC1500001207.mm.1 | Rai14             | 464.07   | 440.06   | 398.75   | 319.01   | 279.50   | 329.00   |
| TC1600001679.mm.1 | Pvrl3             | 107.91   | 111.51   | 98.05    | 78.70    | 74.03    | 85.40    |
| TC1400002757.mm.1 | Tmtc4             | 160.17   | 169.71   | 156.48   | 107.75   | 119.15   | 130.79   |
| TC0100003233.mm.1 | Pla2g4a           | 1368.75  | 1520.89  | 1418.22  | 1052.65  | 939.29   | 1136.14  |
| TC0500000560.mm.1 | Pcdh7             | 192.89   | 182.23   | 148.81   | 117.83   | 110.90   | 116.58   |
| TC0300000802.mm.1 | S100a16           | 187.18   | 180.31   | 152.71   | 128.45   | 120.55   | 115.87   |
| TC1500001262.mm.1 | Gm5803            | 172.85   | 178.12   | 211.45   | 118.85   | 124.13   | 137.84   |
| TC0200002399.mm.1 | Myl9              | 48992.77 | 44944.04 | 44845.30 | 34494.82 | 29484.78 | 35736.45 |
| TC0600001679.mm.1 | Golt1b            | 2477.07  | 2390.53  | 2184.07  | 1591.90  | 1572.21  | 1868.96  |
| TC0900002346.mm.1 | Tspan3            | 1667.69  | 1444.53  | 1378.69  | 982.29   | 991.58   | 1129.95  |
| TC0200004922.mm.1 | Pdrg1             | 185.77   | 205.27   | 189.24   | 146.57   | 144.86   | 163.08   |
| TC1200001261.mm.1 | Inf2              | 342.14   | 321.34   | 287.52   | 233.92   | 231.40   | 249.80   |
| TC1400001741.mm.1 | Ccser2            | 426.63   | 406.77   | 370.95   | 288.87   | 268.65   | 317.81   |
| TC0900000562.mm.1 | Zpr1              | 533.53   | 527.46   | 467.55   | 391.44   | 328.61   | 372.58   |
| TC1600000558.mm.1 | Tmem39a           | 628.22   | 594.42   | 546.06   | 400.21   | 379.61   | 461.15   |
| TC0X00000512.mm.1 | 3830403N18R<br>ik | 246.47   | 235.05   | 204.89   | 153.43   | 168.36   | 171.81   |

|                   |                              |           |           |           |          |          |          |
|-------------------|------------------------------|-----------|-----------|-----------|----------|----------|----------|
| TC0500002168.mm.1 | Cgref1                       | 215.05    | 166.30    | 164.69    | 117.32   | 95.65    | 107.49   |
| TC0900000296.mm.1 | Ets1                         | 118.32    | 119.11    | 108.65    | 85.45    | 85.28    | 96.88    |
| TC0900000492.mm.1 | Pvrl1                        | 523.27    | 542.30    | 440.82    | 335.28   | 263.85   | 323.45   |
| TC0X00001859.mm.1 | Med14                        | 2126.39   | 2367.23   | 2000.33   | 1638.45  | 1664.11  | 1716.01  |
| TC1500000417.mm.1 | D15Ertcd621e                 | 3156.25   | 3108.07   | 2738.52   | 2339.29  | 2113.50  | 2338.30  |
| TC1100003252.mm.1 | Cpd                          | 7999.12   | 8170.16   | 7585.37   | 6071.04  | 5904.61  | 6779.85  |
| TC1200000460.mm.1 | Srp54b;<br>Srp54a            | 7923.32   | 8689.90   | 7808.40   | 4774.77  | 4790.40  | 6145.87  |
| TC1500001167.mm.1 | Osmr                         | 2329.70   | 2505.32   | 2168.37   | 1529.29  | 1314.72  | 1713.71  |
| TC0400000439.mm.1 | Creb3                        | 691.37    | 674.46    | 608.75    | 546.48   | 522.58   | 538.73   |
| TC0400003361.mm.1 | Plk3                         | 556.46    | 523.10    | 474.23    | 346.55   | 325.38   | 397.92   |
| TC0400000889.mm.1 | Gm13271                      | 60.23     | 63.29     | 55.82     | 43.58    | 46.39    | 49.31    |
| TC1200000458.mm.1 | Srp54a                       | 9388.17   | 10370.31  | 9096.00   | 5245.95  | 5472.16  | 7031.61  |
| TC0500000864.mm.1 | Gm1045                       | 32.68     | 41.05     | 38.35     | 21.74    | 26.46    | 24.19    |
| TC1500001089.mm.1 | Igfbp6                       | 129.41    | 111.01    | 91.86     | 55.18    | 65.69    | 65.99    |
| TC0600001383.mm.1 | Gm8430                       | 2021.61   | 1893.14   | 2225.18   | 1420.23  | 1216.22  | 1511.37  |
| TC0900003233.mm.1 | Plcd1                        | 359.20    | 344.55    | 273.95    | 205.54   | 171.10   | 205.92   |
| TC0400000529.mm.1 | Nr4a3                        | 32.57     | 25.85     | 28.86     | 20.36    | 21.13    | 20.80    |
| TC1000000548.mm.1 | Vsir                         | 611.80    | 552.64    | 522.84    | 429.20   | 375.19   | 427.56   |
| TC1700000899.mm.1 | Cul7                         | 140.73    | 141.22    | 125.11    | 104.94   | 100.70   | 111.95   |
| TC1200000608.mm.1 | Dact1                        | 106.89    | 96.73     | 96.99     | 84.74    | 76.45    | 76.02    |
| TC1600001742.mm.1 | Nfkbiz                       | 179.47    | 172.59    | 166.23    | 136.65   | 134.18   | 150.67   |
| TC0400003241.mm.1 | Gpx7                         | 253.69    | 235.51    | 201.82    | 147.47   | 166.48   | 159.96   |
| TC1700000496.mm.1 | Cdkn1a                       | 120705.00 | 123092.00 | 105145.90 | 91087.90 | 84338.35 | 90277.21 |
| TC0300002664.mm.1 | Wnt2b                        | 52.62     | 59.68     | 46.76     | 34.72    | 38.18    | 36.51    |
| TC0100003487.mm.1 | Pbx1                         | 129.28    | 117.39    | 108.89    | 91.16    | 86.57    | 93.71    |
| TC1100002429.mm.1 | Sptbn1                       | 2395.52   | 2523.49   | 2242.14   | 1791.40  | 1905.45  | 2000.05  |
| TC0400003483.mm.1 | D830031N03<br>Rik; Macf1     | 1216.70   | 1413.48   | 1215.60   | 904.76   | 849.01   | 996.91   |
| TC1300001812.mm.1 | Nrn1                         | 280.12    | 282.62    | 227.83    | 142.07   | 159.30   | 182.25   |
| TC1800001640.mm.1 | Setbp1                       | 168.40    | 166.84    | 149.23    | 110.66   | 111.39   | 130.11   |
| TC0900002480.mm.1 | Smad3                        | 176.15    | 188.46    | 167.33    | 133.89   | 129.31   | 147.88   |
| TC1800000741.mm.1 | Tcf4                         | 943.92    | 958.86    | 807.90    | 636.37   | 530.53   | 643.04   |
| TC1400002106.mm.1 | Sdr39u1                      | 106.91    | 88.71     | 93.27     | 69.53    | 74.59    | 71.57    |
| TC0900002283.mm.1 | Layn                         | 2053.91   | 2041.46   | 1915.54   | 1686.46  | 1423.80  | 1510.77  |
| TC1300002435.mm.1 | Jmy                          | 108.84    | 112.05    | 101.26    | 80.23    | 66.60    | 81.54    |
| TC1800000015.mm.1 | 9430020K01Ri<br>k            | 209.66    | 198.51    | 179.41    | 141.28   | 133.02   | 155.54   |
| TC1300002471.mm.1 | Polk                         | 500.46    | 494.53    | 442.22    | 358.08   | 290.32   | 347.28   |
| TC0100003093.mm.1 | Zbed6;<br>Zc3h11a            | 1498.31   | 1593.93   | 1456.75   | 1135.53  | 963.48   | 1183.42  |
| TC1400001311.mm.1 | Gm17613;<br>LOC10086201<br>4 | 119.44    | 143.33    | 134.90    | 94.76    | 80.32    | 96.40    |
| TC0800000192.mm.1 | Gm6483                       | 1449.97   | 1569.42   | 1508.87   | 1038.44  | 833.09   | 1103.75  |
| TC0600001087.mm.1 | Tmem43                       | 2178.93   | 2092.38   | 1877.85   | 1444.40  | 1362.38  | 1624.57  |
| TC0300003231.mm.1 | Arfp1                        | 291.31    | 251.21    | 250.18    | 189.35   | 170.92   | 203.19   |
| TC0X00000012.mm.1 | Gm3750;<br>Gm3706            | 17.63     | 17.17     | 15.12     | 11.32    | 12.64    | 12.93    |
| TC0200005164.mm.1 | Sulf2                        | 1988.13   | 1897.32   | 1739.95   | 1412.18  | 1211.59  | 1444.74  |
| TC0900000210.mm.1 | Prkcsh                       | 2101.94   | 1916.51   | 1875.81   | 1477.99  | 1298.11  | 1557.39  |
| TC0100000334.mm.1 | Erc5                         | 73.44     | 72.32     | 64.85     | 57.02    | 55.22    | 58.78    |
| TC0300003087.mm.1 | Cyr61                        | 61055.75  | 56713.21  | 54807.49  | 40779.31 | 39905.21 | 47367.33 |
| TC0700003442.mm.1 | Mef2a                        | 5619.01   | 6298.24   | 5433.82   | 3531.88  | 3189.25  | 4270.17  |
| TC1900000685.mm.1 | Gbf1                         | 723.22    | 744.56    | 665.62    | 549.15   | 520.89   | 596.62   |
| TC0100001189.mm.1 | Klhdc8a                      | 74.91     | 69.01     | 68.12     | 53.20    | 59.89    | 52.12    |
| TC1500000104.mm.1 | Golph3                       | 196.65    | 180.82    | 176.24    | 151.52   | 131.00   | 145.25   |
| TC0900001486.mm.1 | Epm2aip1                     | 237.78    | 226.66    | 225.81    | 172.46   | 141.25   | 176.86   |
| TC1400002841.mm.1 | Gm3468                       | 54.02     | 53.44     | 60.33     | 39.52    | 42.09    | 45.89    |
| TC0200004924.mm.1 | Gm20094                      | 71653.33  | 66445.34  | 78751.95  | 56074.26 | 52865.77 | 47546.39 |
| TC1400002103.mm.1 | Ripk3                        | 1441.88   | 1426.77   | 1138.88   | 940.15   | 888.98   | 918.17   |
| TC1100000459.mm.1 | Clint1                       | 1252.21   | 1265.85   | 1132.72   | 905.50   | 971.17   | 1018.00  |
| TC0900001674.mm.1 | Ccr2                         | 58.72     | 71.74     | 51.87     | 36.21    | 37.69    | 39.75    |
| TC1100001660.mm.1 | Nbr1                         | 423.07    | 428.59    | 383.23    | 338.30   | 316.96   | 346.44   |
| TC0900000131.mm.1 | Gm5611                       | 262.68    | 263.20    | 211.87    | 179.91   | 163.10   | 163.34   |
| TC1500001403.mm.1 | Ubr5                         | 993.49    | 1082.62   | 930.87    | 673.09   | 653.16   | 793.34   |
| TC0700000007.mm.1 | Cacng7                       | 280.64    | 284.94    | 259.36    | 215.02   | 215.19   | 238.23   |
| TC1500002067.mm.1 | Cpne8                        | 169.89    | 194.24    | 175.43    | 112.77   | 92.82    | 128.80   |
| TC0700003648.mm.1 | Cemip                        | 3835.07   | 3869.81   | 3513.58   | 2854.52  | 2688.94  | 3142.68  |
| TC0700002507.mm.1 | Pvr                          | 746.11    | 681.88    | 600.67    | 485.36   | 461.29   | 512.24   |
| TC0900002981.mm.1 | Uba5                         | 1444.65   | 1392.78   | 1377.33   | 1090.72  | 982.68   | 1183.33  |
| TC1500001008.mm.1 | Spats2                       | 180.82    | 202.07    | 173.75    | 136.88   | 140.42   | 152.14   |
| TC0700000720.mm.1 | Vstm2b                       | 72.49     | 63.81     | 67.57     | 56.55    | 52.29    | 49.23    |
| TC0900002869.mm.1 | Trpc1                        | 55.33     | 58.92     | 52.42     | 46.07    | 39.13    | 39.74    |

|                   |                         |          |          |          |          |          |          |
|-------------------|-------------------------|----------|----------|----------|----------|----------|----------|
| TC0900001672.mm.1 | Cxcr6                   | 70.58    | 70.37    | 49.77    | 37.87    | 33.45    | 30.03    |
| TC0500003116.mm.1 | Hspb8                   | 627.46   | 527.49   | 536.57   | 349.49   | 288.35   | 395.15   |
| TC0800000871.mm.1 | Slc10a7                 | 372.08   | 369.44   | 310.90   | 243.53   | 239.28   | 271.90   |
| TC0200002359.mm.1 | ltch                    | 565.11   | 509.43   | 508.01   | 393.96   | 363.20   | 432.76   |
| TC1100000789.mm.1 | Specc1                  | 369.09   | 345.29   | 317.25   | 270.49   | 259.62   | 283.71   |
| TC1600000097.mm.1 | 1810013L24Rik           | 3256.70  | 2673.72  | 2780.54  | 2200.82  | 1861.24  | 2014.72  |
| TC0400003000.mm.1 | Hacd4                   | 3985.58  | 3723.97  | 3452.54  | 2915.85  | 2732.34  | 3066.30  |
| TC0200001015.mm.1 | Ubr3                    | 411.94   | 408.12   | 371.25   | 296.17   | 304.91   | 337.43   |
| TC0900001408.mm.1 | Lamb2                   | 463.83   | 443.33   | 383.80   | 299.72   | 278.10   | 330.69   |
| TC1400001418.mm.1 | Gm6356                  | 52.44    | 47.52    | 59.89    | 38.77    | 34.15    | 30.95    |
| TC1000000708.mm.1 | Bcr                     | 130.92   | 124.41   | 111.02   | 86.93    | 79.61    | 95.90    |
| TC0800001050.mm.1 | Chd9                    | 487.37   | 559.21   | 473.36   | 364.24   | 339.18   | 399.04   |
| TC0100000462.mm.1 | Bmpr2                   | 1803.68  | 2186.27  | 1671.95  | 1164.79  | 1216.07  | 1341.63  |
| TC1800000543.mm.1 | Csnk1g3                 | 828.84   | 798.55   | 745.17   | 608.63   | 605.04   | 679.93   |
| TC1200000751.mm.1 | Smoc1                   | 390.01   | 359.52   | 351.88   | 254.09   | 192.24   | 256.40   |
| TC0500002386.mm.1 | Adgra3;<br>Adgra2       | 291.90   | 274.41   | 229.28   | 159.75   | 161.04   | 193.00   |
| TC1300000958.mm.1 | Arrdc3                  | 165.33   | 153.92   | 137.50   | 103.97   | 89.28    | 113.15   |
| TC1400002469.mm.1 | Tnfsf11                 | 63.02    | 47.80    | 54.75    | 33.61    | 37.07    | 38.61    |
| TC1400002853.mm.1 | Gm2897                  | 60.29    | 52.99    | 52.20    | 44.58    | 37.97    | 38.89    |
| TC1600000448.mm.1 | Tnk2                    | 157.72   | 167.59   | 139.73   | 120.14   | 122.23   | 113.10   |
| TC1700002298.mm.1 | Pot1b                   | 74.41    | 69.81    | 71.43    | 63.28    | 56.16    | 55.29    |
| TC1300002015.mm.1 | Ror2                    | 69.56    | 59.58    | 62.33    | 41.43    | 47.45    | 49.66    |
| TC1100003538.mm.1 | Tom11                   | 115.87   | 106.45   | 91.68    | 70.85    | 60.37    | 74.31    |
| TC1200001912.mm.1 | Six1                    | 103.36   | 115.10   | 101.24   | 81.48    | 72.47    | 85.67    |
| TC0600001083.mm.1 | Fbln2                   | 4726.23  | 4665.77  | 4001.83  | 2962.54  | 2831.21  | 3469.70  |
| TC0500003136.mm.1 | Fbxw8                   | 680.55   | 658.90   | 583.71   | 523.32   | 515.85   | 509.15   |
| TC1200000134.mm.1 | Rock2                   | 1592.51  | 1791.28  | 1490.16  | 1122.65  | 989.54   | 1233.11  |
| TC0200003579.mm.1 | Acvr1                   | 127.59   | 127.86   | 111.60   | 101.06   | 98.42    | 98.20    |
| TC0700000005.mm.1 | Myadm                   | 41689.32 | 40366.82 | 35907.49 | 30827.86 | 27407.12 | 31188.24 |
| TC1300000460.mm.1 | Gcnt2                   | 272.32   | 242.73   | 238.94   | 163.50   | 164.96   | 201.15   |
| TC1000001328.mm.1 | Zfc3h1                  | 798.77   | 954.70   | 826.25   | 551.06   | 496.53   | 646.61   |
| TC0900002276.mm.1 | 2310030G06Rik           | 68.25    | 49.52    | 54.63    | 31.92    | 38.72    | 31.83    |
| TC0900000100.mm.1 | Sesn3                   | 170.09   | 176.38   | 134.75   | 107.79   | 99.66    | 111.35   |
| TC0600002683.mm.1 | Sec61a1                 | 829.78   | 806.05   | 715.99   | 632.04   | 642.06   | 641.68   |
| TC0500000402.mm.1 | Afap1                   | 94.55    | 89.72    | 86.46    | 68.25    | 60.33    | 74.19    |
| TC1400002325.mm.1 | R3hcc1                  | 137.10   | 147.73   | 117.63   | 97.43    | 97.43    | 100.98   |
| TC1600000440.mm.1 | Tm4sf19                 | 126.67   | 111.26   | 99.99    | 66.09    | 65.30    | 82.69    |
| TC0400000458.mm.1 | Glpr2                   | 572.49   | 481.47   | 571.13   | 370.51   | 348.75   | 420.80   |
| TC1200000996.mm.1 | 9030617O03Rik           | 105.41   | 112.71   | 100.36   | 79.50    | 76.92    | 89.88    |
| TC0700001893.mm.1 | Sec23ip                 | 1663.70  | 1615.14  | 1464.99  | 1201.33  | 1037.26  | 1255.15  |
| TC1600001879.mm.1 | 4930423O20Rik           | 315.19   | 360.84   | 326.81   | 265.57   | 209.41   | 230.25   |
| TC1400000975.mm.1 | Entpd4                  | 215.15   | 207.41   | 183.13   | 161.55   | 156.29   | 164.34   |
| TC0900002212.mm.1 | Tagln                   | 30167.29 | 30027.84 | 24557.48 | 19870.79 | 20722.36 | 21196.30 |
| TC0500001026.mm.1 | Pkd2                    | 387.12   | 395.82   | 348.57   | 286.92   | 274.83   | 316.59   |
| TC1100000475.mm.1 | Havcr2                  | 829.12   | 811.68   | 727.68   | 608.32   | 458.22   | 523.97   |
| TC1600001939.mm.1 | Btg3; Gm7334            | 1355.89  | 1270.96  | 1379.78  | 975.48   | 797.71   | 1032.43  |
| TC0300001035.mm.1 | Tspan2                  | 38.67    | 41.55    | 34.30    | 29.51    | 28.28    | 30.21    |
| TC1300002335.mm.1 | Rhobtb3                 | 257.57   | 264.56   | 215.69   | 186.24   | 158.63   | 174.69   |
| TC0700001689.mm.1 | Xylt1                   | 474.98   | 461.84   | 426.11   | 325.28   | 316.31   | 380.39   |
| TC1400002117.mm.1 | Gzmg                    | 82.68    | 67.28    | 84.20    | 55.60    | 57.16    | 56.72    |
| TC0700001362.mm.1 | Pak1                    | 913.32   | 950.53   | 815.63   | 702.57   | 664.05   | 736.87   |
| TC0700001767.mm.1 | Gm20274                 | 128.21   | 127.75   | 105.72   | 93.37    | 87.51    | 86.91    |
| TC1400002336.mm.1 | Slc39a14                | 204.85   | 199.42   | 189.03   | 158.68   | 131.76   | 157.17   |
| TC0900001473.mm.1 | Prss46                  | 154.95   | 161.06   | 147.29   | 93.37    | 109.26   | 122.18   |
| TC1700001178.mm.1 | Crim1                   | 1426.18  | 1311.99  | 1150.37  | 910.30   | 788.91   | 963.36   |
| TC0400002016.mm.1 | Acot7                   | 468.79   | 426.81   | 393.56   | 308.49   | 292.79   | 345.65   |
| TC0300001932.mm.1 | Pcdh18                  | 72.72    | 88.70    | 61.41    | 43.21    | 42.54    | 48.39    |
| TC1100000937.mm.1 | Dlg4                    | 120.42   | 119.04   | 102.03   | 88.00    | 80.90    | 90.18    |
| TC1700000474.mm.1 | Ppard;<br>1810013A23Rik | 234.81   | 240.14   | 203.76   | 172.95   | 177.40   | 183.79   |
| TC1100001834.mm.1 | Prkar1a                 | 858.39   | 841.71   | 777.70   | 645.24   | 621.80   | 714.80   |
| TC0X00001939.mm.1 | Zfp300                  | 35.36    | 35.92    | 31.33    | 28.58    | 28.22    | 27.61    |
| TC0800001269.mm.1 | Nfat5                   | 469.76   | 532.05   | 490.53   | 364.54   | 296.66   | 378.42   |
| TC1300000934.mm.1 | 2210408I21Rik           | 52.69    | 53.44    | 47.63    | 40.96    | 34.02    | 39.71    |
| TC1200001757.mm.1 | Cfl2                    | 1768.37  | 1701.35  | 1395.49  | 1049.22  | 1179.81  | 1162.89  |
| TC0900002284.mm.1 | 4833427G06Rik           | 59.46    | 57.77    | 60.90    | 43.91    | 35.08    | 45.70    |

|                         |                                             |          |          |          |          |          |          |
|-------------------------|---------------------------------------------|----------|----------|----------|----------|----------|----------|
| TC1200001262.mm.1       | Adssl1                                      | 291.46   | 269.37   | 266.18   | 197.34   | 211.24   | 235.09   |
| TC0900002123.mm.1       | Arhgef12                                    | 233.72   | 242.66   | 203.88   | 170.22   | 159.10   | 182.08   |
| TC0X00003000.mm.1       | Armxc2                                      | 110.65   | 107.85   | 90.28    | 79.85    | 73.05    | 75.45    |
| TC1400001990.mm.1       | Klhl33                                      | 20.87    | 16.95    | 20.68    | 13.91    | 13.70    | 14.93    |
| TC1000002236.mm.1       | Unc5b                                       | 553.32   | 499.57   | 477.16   | 377.07   | 290.83   | 363.89   |
| TC1400001346.mm.1       | Itgbl1                                      | 107.55   | 95.17    | 83.98    | 64.44    | 65.11    | 72.34    |
| TC1400001900.mm.1       | Gnpnat1                                     | 230.12   | 244.59   | 189.73   | 159.15   | 141.31   | 157.26   |
| TC0400003329.mm.1       | Nsun4                                       | 103.86   | 104.42   | 99.00    | 76.83    | 71.51    | 87.66    |
| TC1100002449.mm.1       | Erlec1                                      | 1140.14  | 1022.84  | 1077.31  | 827.98   | 658.52   | 816.06   |
| TC0400004219.mm.1       | B4galt2                                     | 154.20   | 138.76   | 131.98   | 116.26   | 98.27    | 102.28   |
| TC0400000894.mm.1       | Gm13272;<br>Gm13285;<br>Gm13290;<br>Gm13289 | 32.00    | 29.44    | 31.73    | 26.62    | 23.09    | 25.55    |
| TC0400002469.mm.1       | Al464131                                    | 42.27    | 42.93    | 38.63    | 35.15    | 30.42    | 33.03    |
| TC0400003537.mm.1       | Ago3                                        | 376.06   | 395.23   | 332.94   | 273.23   | 263.43   | 300.51   |
| TC1200000083.mm.1       | Osr1                                        | 1288.13  | 1329.36  | 981.78   | 598.98   | 658.66   | 804.92   |
| TC1500000805.mm.1       | Atxn10                                      | 11711.93 | 11308.55 | 10722.06 | 8897.01  | 8684.54  | 9912.81  |
| TC0900000019.mm.1       | Gucy1a2                                     | 46.08    | 52.25    | 40.51    | 34.56    | 30.17    | 32.09    |
| TC0300000972.mm.1       | Sec22b                                      | 312.43   | 295.54   | 272.40   | 195.55   | 164.19   | 223.48   |
| TC1000003032.mm.1       | Msr3                                        | 1224.42  | 1307.86  | 1061.42  | 865.86   | 852.61   | 945.01   |
| TC0900000124.mm.1       | Smco4                                       | 52.80    | 54.75    | 51.62    | 46.20    | 38.57    | 41.17    |
| TC0800003222.mm.1       | 6820431F20Ri<br>k; Gm21092                  | 3273.39  | 3756.94  | 3131.09  | 2292.26  | 1966.06  | 2560.05  |
| TC1300000054.mm.1       | Dip2c                                       | 230.44   | 229.08   | 215.03   | 182.73   | 164.60   | 193.55   |
| TC0200000636.mm.1       | Gsn                                         | 713.43   | 686.42   | 607.81   | 465.94   | 434.66   | 537.33   |
| TC1600001461.mm.1       | Atp13a3                                     | 1114.11  | 1156.20  | 1039.11  | 852.87   | 781.56   | 933.65   |
| TC1300001789.mm.1       | Pxdc1                                       | 161.44   | 166.21   | 134.58   | 113.77   | 90.68    | 105.79   |
| TC1600001604.mm.1       | Pla1a                                       | 99.75    | 90.89    | 82.93    | 71.60    | 58.87    | 66.16    |
| TC1100003019.mm.1       | Ndel1                                       | 399.91   | 415.27   | 355.33   | 307.64   | 284.92   | 320.76   |
| TC1700000563.mm.1       | Cyp4f17                                     | 145.52   | 145.99   | 139.60   | 102.62   | 101.79   | 123.77   |
| TC1100000039.mm.1       | Gatsl3                                      | 310.31   | 256.93   | 248.79   | 197.38   | 161.54   | 191.54   |
| TC1400000980.mm.1       | Entpd4;<br>Gm21685                          | 343.58   | 344.30   | 296.05   | 257.80   | 251.93   | 270.89   |
| TC1400000958.mm.1       | Ebf2                                        | 88.42    | 77.14    | 68.51    | 57.62    | 55.45    | 56.93    |
| TC1000002612.mm.1       | Rtcb                                        | 1996.21  | 1970.99  | 1676.05  | 1102.55  | 1141.10  | 1444.77  |
| TC0900001155.mm.1       | Ctsh                                        | 5137.80  | 4774.17  | 4534.35  | 3445.42  | 3021.04  | 3872.12  |
| TC0500003048.mm.1       | Tmem119                                     | 460.50   | 411.60   | 327.96   | 267.73   | 246.54   | 257.56   |
| TC0600000308.mm.1       | Exoc4                                       | 549.98   | 569.58   | 536.24   | 429.39   | 432.72   | 492.96   |
| TC1100003072.mm.1       | Kctd11                                      | 150.13   | 162.03   | 138.97   | 92.84    | 91.19    | 118.79   |
| TC0200002293.mm.1       | Rem1                                        | 104.32   | 105.42   | 91.57    | 75.47    | 65.51    | 79.87    |
| TC0500000195.mm.1       | Kmt2e                                       | 1562.65  | 1726.84  | 1510.27  | 1257.10  | 1139.68  | 1330.51  |
| TC1500001971.mm.1       | Arfgap3                                     | 310.90   | 295.06   | 261.64   | 218.51   | 195.25   | 230.83   |
| TC0400001250.mm.1       | Pik3r3                                      | 216.62   | 202.01   | 193.34   | 154.37   | 131.59   | 164.40   |
| TC1100002288.mm.1       | Actr2                                       | 8905.05  | 8828.37  | 8528.28  | 6990.76  | 7059.63  | 7937.12  |
| TC0100000372.mm.1       | Sdpr                                        | 681.83   | 687.03   | 466.26   | 221.45   | 207.58   | 349.85   |
| TC1100000025.mm.1       | Dusp18                                      | 156.36   | 149.55   | 124.53   | 105.68   | 108.06   | 96.80    |
| TC0400003456.mm.1       | Rlf                                         | 435.03   | 433.81   | 371.64   | 308.19   | 249.12   | 306.48   |
| TC1300000476.mm.1       | Hivep1                                      | 242.01   | 245.26   | 219.23   | 192.51   | 181.38   | 203.38   |
| TC1400002832.mm.1       | Pabpn1                                      | 682.97   | 667.95   | 617.91   | 523.85   | 518.18   | 579.39   |
| TC0200001053.mm.1       | Zak                                         | 237.87   | 226.38   | 223.59   | 172.05   | 174.91   | 202.22   |
| TC0800001872.mm.1       | Polb                                        | 200.91   | 205.53   | 187.47   | 160.70   | 143.03   | 168.27   |
| TC0700000399.mm.1       | Gm9844                                      | 28498.37 | 27718.20 | 31669.69 | 21997.44 | 16509.44 | 20729.96 |
| TC0500000648.mm.1       | Slc30a9                                     | 450.89   | 442.21   | 405.16   | 325.18   | 283.01   | 353.97   |
| TC1200001715.mm.1       | Strn3                                       | 897.88   | 1021.86  | 864.82   | 673.09   | 597.66   | 737.55   |
| TC0100001611.mm.1       | Kcnj10                                      | 959.31   | 853.23   | 742.65   | 618.92   | 541.90   | 619.87   |
| TC0200000574.mm.1       | Golga2                                      | 218.79   | 212.84   | 211.29   | 151.21   | 165.22   | 185.79   |
| TC0500000112.mm.1       | Cacna2d1                                    | 168.82   | 147.58   | 133.79   | 102.22   | 90.68    | 113.31   |
| TC1300000924.mm.1       | Ttc37                                       | 330.99   | 336.80   | 317.90   | 258.90   | 240.44   | 288.10   |
| TC1300000364.mm.1       | Serp1b9                                     | 113.77   | 109.51   | 100.99   | 93.85    | 84.76    | 82.38    |
| TC0800000328.mm.1       | Plpp5                                       | 442.90   | 439.94   | 363.96   | 314.99   | 262.99   | 302.46   |
| TC0600001736.mm.1       | Stk38l                                      | 501.09   | 504.49   | 495.75   | 383.56   | 304.41   | 393.02   |
| TC1400002843.mm.1       | Gm3411                                      | 45.64    | 39.04    | 44.52    | 31.42    | 34.32    | 35.29    |
| TC1100004196.mm.1       | Slc38a10                                    | 441.12   | 475.87   | 398.73   | 309.69   | 310.39   | 360.44   |
| TC0800001031.mm.1       | Adcy7                                       | 1276.70  | 1262.69  | 1139.42  | 897.20   | 860.30   | 1038.18  |
| TC1500002059.mm.1       | Rabl2                                       | 304.23   | 288.92   | 240.46   | 193.14   | 206.07   | 210.35   |
| TC0500000896.mm.1       | Ccng2                                       | 96.36    | 95.95    | 92.48    | 76.21    | 66.05    | 80.71    |
| TC0400000613.mm.1       | Rad23b                                      | 8886.23  | 8508.04  | 7774.79  | 6250.57  | 5309.91  | 6725.38  |
| TC1500002209.mm.1       | Fmnl3                                       | 522.46   | 478.63   | 470.32   | 359.75   | 307.85   | 397.75   |
| TC0500001909.mm.1       | Cldn12                                      | 70.87    | 81.98    | 81.15    | 64.09    | 62.21    | 65.40    |
| TC0800000368.mm.1       | Rnf122                                      | 71.72    | 60.63    | 56.41    | 42.21    | 33.67    | 44.71    |
| TSUnmapped00000001.mm.1 | Plpp2                                       | 354.24   | 308.03   | 320.70   | 238.62   | 230.74   | 276.24   |
| TC0800002145.mm.1       | Fam149a                                     | 495.65   | 458.68   | 419.18   | 345.82   | 284.52   | 352.60   |
| TC0300002406.mm.1       | Lce1f                                       | 47.55    | 49.90    | 46.06    | 22.35    | 35.06    | 22.27    |

|                         |                              |          |          |          |          |          |          |
|-------------------------|------------------------------|----------|----------|----------|----------|----------|----------|
| TC0500002231.mm.1       | Mxd4                         | 683.70   | 624.26   | 558.73   | 455.08   | 456.73   | 506.24   |
| TC0500002432.mm.1       | LOC432823                    | 582.48   | 678.55   | 562.42   | 462.55   | 378.69   | 453.20   |
| TC0700001275.mm.1       | Picalm                       | 30732.23 | 31765.40 | 29081.71 | 23672.83 | 20935.16 | 25851.12 |
| TC0600003020.mm.1       | Erc1                         | 190.39   | 204.36   | 186.03   | 148.35   | 139.13   | 167.69   |
| TC0400001957.mm.1       | Clstn1                       | 188.42   | 171.94   | 167.79   | 136.12   | 131.58   | 152.78   |
| TC0700004119.mm.1       | Dkk3                         | 932.26   | 929.04   | 840.55   | 741.94   | 618.01   | 720.75   |
| TC0400000834.mm.1       | Snapc3                       | 344.06   | 388.00   | 334.77   | 259.66   | 218.63   | 280.42   |
| TC0300000925.mm.1       | Mtmr11                       | 60.10    | 60.61    | 57.25    | 46.81    | 41.63    | 51.11    |
| TC1200001106.mm.1       | Hhipl1                       | 193.81   | 187.41   | 144.19   | 112.25   | 83.93    | 112.08   |
| TC1600000890.mm.1       | Gm17333;<br>LOC10086229<br>9 | 52.34    | 56.81    | 56.77    | 43.85    | 32.27    | 39.18    |
| TC0300002025.mm.1       | Wwtr1                        | 151.50   | 131.83   | 117.88   | 82.79    | 62.54    | 91.42    |
| TC1800000599.mm.1       | Chsy3                        | 60.47    | 47.91    | 45.83    | 35.60    | 37.47    | 34.32    |
| TSUnmapped00000005.mm.1 | Amot                         | 116.97   | 103.25   | 102.63   | 70.13    | 59.15    | 83.27    |
| TC0600000215.mm.1       | Snd1                         | 484.07   | 492.62   | 441.00   | 354.31   | 355.29   | 410.82   |
| TC0900001905.mm.1       | Zfp810                       | 142.84   | 138.76   | 133.05   | 101.56   | 77.51    | 104.77   |
| TC0700000963.mm.1       | Atp5l-ps1                    | 1102.68  | 874.77   | 1018.16  | 736.76   | 556.87   | 673.30   |
| TC0500000289.mm.1       | Ept1                         | 609.39   | 622.93   | 516.06   | 400.17   | 412.13   | 471.45   |
| TC0100000323.mm.1       | Nck2                         | 109.31   | 104.04   | 91.38    | 79.41    | 84.21    | 78.86    |
| TC0800002471.mm.1       | Large                        | 892.10   | 840.00   | 745.53   | 625.35   | 567.21   | 672.18   |
| TC0500001328.mm.1       | Tbx5                         | 32.50    | 27.04    | 31.68    | 21.66    | 24.82    | 22.65    |
| TC0200000274.mm.1       | Plxdc2                       | 3784.25  | 3837.14  | 3206.74  | 2644.67  | 2363.09  | 2874.19  |
| TC0200002136.mm.1       | Dstn                         | 23511.39 | 22807.33 | 20571.39 | 15625.47 | 15896.85 | 18878.80 |
| TC0900000090.mm.1       | Maml2                        | 845.84   | 909.44   | 782.85   | 665.89   | 661.14   | 729.20   |
| TC1000002265.mm.1       | Ddx50                        | 143.26   | 158.90   | 130.89   | 113.83   | 100.54   | 114.34   |
| TC0800000441.mm.1       | D8Ertcd82e                   | 75.75    | 65.99    | 64.57    | 52.03    | 47.38    | 56.56    |
| TC0400003417.mm.1       | Zfp691                       | 140.55   | 121.20   | 137.46   | 112.33   | 109.71   | 109.84   |
| TC0900001128.mm.1       | Nt5e                         | 172.73   | 163.82   | 144.24   | 118.34   | 107.33   | 130.28   |
| TC0300002595.mm.1       | Ptgfrn                       | 311.80   | 298.73   | 259.48   | 172.42   | 145.92   | 217.00   |
| TC1500000021.mm.1       | Prkaa1                       | 3816.27  | 3633.61  | 3200.10  | 2511.78  | 2255.04  | 2863.08  |
| TC1100003770.mm.1       | P3h4                         | 1911.79  | 1817.29  | 1725.55  | 1372.45  | 1277.80  | 1569.67  |
| TC0700003783.mm.1       | Emsy                         | 810.07   | 839.88   | 701.02   | 601.89   | 508.60   | 611.42   |
| TC0500000021.mm.1       | Akap9                        | 110.34   | 137.58   | 113.71   | 87.20    | 85.16    | 95.39    |
| TC0900002779.mm.1       | Pgm3                         | 196.91   | 221.91   | 184.53   | 138.95   | 134.92   | 165.21   |
| TC0400000084.mm.1       | Trp53inp1                    | 675.21   | 712.51   | 621.37   | 508.32   | 418.44   | 533.36   |
| TC0900001725.mm.1       | 9230110C19R<br>ik            | 54.94    | 52.23    | 50.70    | 35.66    | 34.94    | 44.82    |
| TC1800000805.mm.1       | Smad7                        | 76.95    | 80.72    | 70.12    | 62.37    | 48.41    | 55.00    |
| TC0100003380.mm.1       | Suco                         | 435.39   | 484.41   | 387.67   | 285.69   | 266.24   | 343.45   |
| TC0500000532.mm.1       | Pi4k2b                       | 168.28   | 173.58   | 152.53   | 109.49   | 100.45   | 134.93   |
| TC1000002725.mm.1       | Socs2                        | 100.65   | 95.79    | 86.71    | 72.25    | 70.77    | 81.15    |
| TC0100003302.mm.1       | BC034090                     | 46.21    | 40.79    | 38.29    | 32.60    | 32.22    | 34.68    |
| TC1200001527.mm.1       | 9030624G23R<br>ik            | 105.79   | 92.00    | 93.08    | 69.53    | 58.40    | 77.18    |
| TC0400000248.mm.1       | Map3k7                       | 621.73   | 551.81   | 527.36   | 439.13   | 423.35   | 480.30   |
| TC0X00000316.mm.1       | Il13ra1                      | 5674.09  | 5476.99  | 4706.35  | 4048.52  | 4008.54  | 4367.99  |
| TC0800001289.mm.1       | Zfhx3                        | 1021.98  | 952.02   | 896.95   | 712.33   | 631.11   | 799.16   |
| TC1100002921.mm.1       | Ulk2                         | 537.56   | 554.30   | 461.87   | 392.78   | 332.33   | 406.71   |
| TC1400002866.mm.1       | Gzmc                         | 52.69    | 42.48    | 45.59    | 36.82    | 31.33    | 28.02    |
| TC0900001724.mm.1       | Yap1                         | 151.39   | 140.61   | 131.87   | 101.27   | 96.98    | 120.18   |
| TC0500002840.mm.1       | Plac8                        | 210.38   | 185.36   | 211.13   | 145.23   | 159.49   | 171.55   |
| TC1600000392.mm.1       | Hes1                         | 133.31   | 120.78   | 129.50   | 95.68    | 91.40    | 111.65   |
| TC1400000130.mm.1       | Top2b                        | 420.65   | 465.36   | 402.61   | 333.45   | 293.07   | 357.29   |
| TC1600000335.mm.1       | St6gal1                      | 674.37   | 617.26   | 574.16   | 442.98   | 432.21   | 525.09   |
| TC0200001072.mm.1       | Scrn3                        | 143.78   | 128.78   | 138.90   | 108.97   | 99.46    | 119.12   |
| TC0X00003146.mm.1       | Lrch2                        | 65.62    | 62.78    | 53.93    | 41.99    | 38.71    | 49.07    |
| TC1000002592.mm.1       | Nuak1                        | 2638.16  | 2601.34  | 2220.71  | 1928.62  | 1784.51  | 2054.41  |
| TC1700001598.mm.1       | Tnfrsf12a                    | 441.73   | 429.77   | 347.74   | 178.68   | 182.24   | 288.84   |
| TC0400000532.mm.1       | Msantd3                      | 49.35    | 55.39    | 58.78    | 46.02    | 39.86    | 41.46    |
| TC0100000021.mm.1       | Rb1cc1                       | 255.42   | 274.84   | 223.12   | 184.89   | 154.47   | 194.42   |
| TC1300002629.mm.1       | Zswim6                       | 4420.96  | 4195.28  | 3624.41  | 3145.42  | 2724.20  | 3236.17  |
| TC0800001245.mm.1       | Slc7a6                       | 737.48   | 708.48   | 647.66   | 546.85   | 505.79   | 603.34   |
| TC1300002474.mm.1       | Hmgcr                        | 715.10   | 722.06   | 605.73   | 448.40   | 457.96   | 559.37   |
| TC1900001490.mm.1       | Aldh18a1                     | 674.19   | 655.90   | 580.92   | 443.04   | 456.26   | 541.04   |
| TC1200000114.mm.1       | Gm9847                       | 1060.00  | 1108.51  | 802.18   | 614.37   | 436.19   | 629.90   |
| TC0600002177.mm.1       | Tcaf2                        | 72.75    | 66.21    | 63.74    | 52.30    | 44.53    | 55.84    |
| TC0300002800.mm.1       | Slc30a7                      | 1231.54  | 1196.08  | 1109.87  | 882.77   | 884.05   | 1042.70  |
| TC1300000607.mm.1       | Gadd45g                      | 603.04   | 524.57   | 528.63   | 353.25   | 353.09   | 457.80   |
| TC0500001134.mm.1       | Golga3                       | 120.54   | 125.48   | 119.83   | 90.43    | 83.02    | 106.53   |
| TC0400002513.mm.1       | Vcp                          | 2545.34  | 2546.63  | 2407.24  | 1982.81  | 1822.30  | 2223.07  |
| TC0800000440.mm.1       | Rps12-ps24                   | 6157.93  | 5633.88  | 6508.47  | 5260.48  | 4398.53  | 4662.24  |
| TC0600002796.mm.1       | Eogt                         | 436.54   | 411.13   | 360.98   | 302.59   | 283.96   | 335.16   |
| TC0900000662.mm.1       | Crabp1                       | 243.64   | 265.13   | 218.42   | 165.54   | 191.65   | 193.98   |

|                                      |                     |           |           |          |          |          |          |
|--------------------------------------|---------------------|-----------|-----------|----------|----------|----------|----------|
| TC0200002648.mm.1                    | Dok5                | 180.23    | 170.89    | 157.32   | 93.28    | 111.99   | 134.75   |
| TC0700000847.mm.1                    | Gys1                | 271.70    | 276.10    | 241.91   | 214.40   | 198.05   | 227.62   |
| TC0100002337.mm.1                    | Stk17b              | 2998.72   | 2891.93   | 2428.56  | 1991.39  | 1749.92  | 2200.57  |
| TC0400003822.mm.1                    | Cda                 | 98.14     | 103.43    | 72.33    | 58.51    | 61.29    | 48.49    |
| TC0100001574.mm.1                    | Fcgr4               | 366.91    | 319.09    | 283.67   | 235.80   | 200.46   | 245.49   |
| TC0300002470.mm.1                    | Mlit11              | 275.53    | 257.21    | 220.42   | 181.39   | 140.39   | 184.99   |
| TC0200003435.mm.1                    | Golga1              | 123.04    | 110.76    | 105.81   | 86.32    | 81.80    | 97.43    |
| TC1600000618.mm.1                    | Zbtb20;<br>Mir568   | 147.52    | 181.79    | 145.18   | 113.91   | 109.57   | 126.18   |
| TC0200001025.mm.1                    | Gorasp2             | 272.39    | 263.98    | 229.79   | 207.59   | 207.46   | 215.33   |
| TC1300000076.mm.1                    | Gm2399              | 3466.72   | 3575.81   | 2674.25  | 1739.78  | 1225.88  | 2122.77  |
| TC0600003169.mm.1                    | Ccnd2               | 19061.69  | 18107.46  | 15179.21 | 13006.52 | 10424.60 | 13039.52 |
| TC1500002339.mm.1                    | Hoxc10              | 517.71    | 527.30    | 541.99   | 363.61   | 239.08   | 368.65   |
| TC1_GL456221_random00000010<br>.mm.1 |                     | 898.20    | 1087.79   | 1132.86  | 735.12   | 418.69   | 534.63   |
| TC1600000188.mm.1                    | Gm21897             | 26020.76  | 29952.15  | 27622.34 | 19589.38 | 12418.97 | 18276.85 |
| TC1700002699.mm.1                    | Kcnk12              | 35.88     | 46.80     | 40.72    | 29.15    | 32.49    | 27.94    |
| TC0300001031.mm.1                    | Ngf                 | 1557.11   | 1773.37   | 1554.99  | 1239.41  | 1201.68  | 1416.18  |
| TC1400001958.mm.1                    | Exoc5               | 401.30    | 408.56    | 352.38   | 306.56   | 296.20   | 335.96   |
| TC1800001139.mm.1                    | Nrep                | 93.23     | 112.04    | 117.79   | 77.96    | 86.24    | 80.44    |
| TC0600002554.mm.1                    | Dok1                | 357.44    | 288.18    | 251.12   | 196.96   | 167.20   | 210.65   |
| TC0100002312.mm.1                    | Gm8420              | 36447.83  | 33686.74  | 35196.09 | 30421.21 | 23238.32 | 25407.71 |
| TC0300000453.mm.1                    | Tsc22d2             | 577.20    | 641.52    | 544.88   | 457.06   | 415.03   | 498.52   |
| TC0100002314.mm.1                    | Gls                 | 441.39    | 519.29    | 421.03   | 325.88   | 330.04   | 381.19   |
| TC0300002828.mm.1                    | Ptbp2               | 194.80    | 246.56    | 191.58   | 144.35   | 121.73   | 159.00   |
| TC1300002596.mm.1                    | Trappc13            | 562.06    | 616.93    | 494.49   | 418.90   | 365.81   | 446.93   |
| TC1000002224.mm.1                    | Ddit4               | 205.73    | 143.50    | 161.76   | 112.63   | 86.93    | 114.21   |
| TC1900000015.mm.1                    | 1810055G02R<br>ik   | 251.75    | 274.40    | 201.28   | 152.73   | 164.10   | 182.52   |
| TC0900000848.mm.1                    | Rbpms2              | 631.22    | 631.88    | 590.51   | 453.30   | 554.37   | 473.38   |
| TC0400000902.mm.1                    | Gm13285;<br>Gm13287 | 98.16     | 84.03     | 74.07    | 60.78    | 56.09    | 66.36    |
| TC0500000843.mm.1                    | Pf4                 | 5802.30   | 4904.11   | 5500.85  | 4140.34  | 4665.61  | 4055.29  |
| TC1100003071.mm.1                    | Tmem95              | 38.36     | 40.82     | 28.54    | 24.14    | 24.88    | 22.19    |
| TC0700003978.mm.1                    | Prkcdbp             | 2327.95   | 1667.22   | 1485.32  | 1194.84  | 983.03   | 1067.93  |
| TC0900001838.mm.1                    | Zfp266              | 758.11    | 742.02    | 703.45   | 584.92   | 413.03   | 536.66   |
| TC0300001395.mm.1                    | Gm21962             | 40551.33  | 50620.02  | 48255.66 | 35107.37 | 23470.52 | 29609.41 |
| TC0500002885.mm.1                    | LOC432823           | 410.28    | 418.67    | 441.07   | 296.06   | 221.53   | 329.78   |
| TC0400001395.mm.1                    | Pabpc4              | 636.76    | 606.09    | 555.44   | 512.71   | 415.27   | 471.85   |
| TC0200003398.mm.1                    | Rc3h2               | 1342.76   | 1610.21   | 1307.39  | 976.72   | 906.38   | 1159.31  |
| TC0800000472.mm.1                    | Micu3               | 100.71    | 89.12     | 77.45    | 62.47    | 54.21    | 69.53    |
| TC1700000414.mm.1                    | Gm8225              | 297.27    | 278.46    | 268.87   | 246.69   | 196.31   | 194.40   |
| TC1700002660.mm.1                    | Prepl               | 539.72    | 506.19    | 437.60   | 380.49   | 322.15   | 393.78   |
| TC1000001084.mm.1                    | Arl1                | 2838.76   | 2733.61   | 2363.97  | 2007.35  | 1935.87  | 2250.66  |
| TC0700000247.mm.1                    | Ccdc8               | 28.70     | 27.40     | 24.16    | 22.61    | 17.80    | 17.83    |
| TC0500001170.mm.1                    | Gm26897             | 46.06     | 54.93     | 60.09    | 37.40    | 42.82    | 38.06    |
| TC0100001358.mm.1                    | Edem3               | 511.64    | 536.98    | 479.25   | 361.23   | 355.19   | 446.84   |
| TC1200002243.mm.1                    | Trip11              | 276.00    | 312.09    | 253.09   | 227.48   | 191.84   | 219.64   |
| TC0500003268.mm.1                    | Ncor2               | 525.17    | 493.56    | 443.25   | 414.63   | 354.99   | 391.99   |
| TC1600000911.mm.1                    | 1700066C05R<br>ik   | 232.47    | 247.05    | 302.70   | 193.71   | 144.39   | 182.26   |
| TC1200001306.mm.1                    | Ncapg2              | 267.75    | 290.07    | 244.02   | 198.50   | 182.93   | 227.73   |
| TC0700000240.mm.1                    | Dact3               | 84.73     | 71.55     | 77.40    | 54.79    | 65.71    | 62.07    |
| TC0500001153.mm.1                    | Ttc28               | 115.52    | 116.41    | 102.39   | 86.03    | 89.56    | 98.69    |
| TC0700000946.mm.1                    | Atp10a              | 323.90    | 329.37    | 302.12   | 253.62   | 252.73   | 291.16   |
| TC0500000125.mm.1                    | Hgf                 | 347.66    | 366.05    | 319.59   | 269.46   | 211.53   | 275.43   |
| TC0500001451.mm.1                    | Atp6v0a2            | 724.61    | 707.63    | 648.87   | 548.10   | 518.10   | 619.63   |
| TC1300001353.mm.1                    | Hmgcs1              | 2297.02   | 2194.80   | 1927.20  | 1516.63  | 1510.17  | 1832.39  |
| TC1000002464.mm.1                    | 2610008E11Ri<br>k   | 178.79    | 222.92    | 183.29   | 136.86   | 130.53   | 159.70   |
| TC0300000139.mm.1                    | Hltf                | 167.76    | 192.31    | 176.90   | 141.24   | 118.03   | 149.52   |
| TC0100003620.mm.1                    | Cep170              | 977.48    | 1194.47   | 1000.99  | 748.68   | 625.56   | 842.51   |
| TC1200000211.mm.1                    | Kidins220           | 776.93    | 803.83    | 748.54   | 610.95   | 563.28   | 697.91   |
| TC1700001857.mm.1                    | Cyp4f13             | 184.11    | 180.92    | 156.93   | 149.73   | 140.30   | 144.47   |
| TC1500000221.mm.1                    | Sdc2                | 4656.80   | 4663.81   | 4116.33  | 3411.82  | 2845.98  | 3731.09  |
| TC1000003103.mm.1                    | Arhgef25            | 179.32    | 176.13    | 159.88   | 126.76   | 126.38   | 152.71   |
| TC1300002380.mm.1                    | Rasa1               | 863.35    | 1003.69   | 839.85   | 660.32   | 533.20   | 719.66   |
| TC1700000344.mm.1                    | Pkd1                | 493.16    | 471.96    | 409.62   | 368.24   | 335.19   | 385.45   |
| TC0X00002158.mm.1                    | Zdhhc9              | 253.20    | 243.97    | 226.21   | 218.05   | 186.81   | 192.69   |
| TC1400002059.mm.1                    | Ajuba               | 238.08    | 185.06    | 162.29   | 138.60   | 109.72   | 127.13   |
| TC0X00002671.mm.1                    | Las1l               | 115.34    | 110.72    | 107.76   | 86.34    | 77.89    | 99.23    |
| TC0600002672.mm.1                    | H1fx                | 17.51     | 19.54     | 16.80    | 13.74    | 15.86    | 13.45    |
| TC0200005363.mm.1                    | Gm14409             | 236.12    | 219.95    | 246.60   | 207.75   | 164.31   | 176.22   |
| TC1300002689.mm.1                    | Gpx8                | 125967.10 | 117189.30 | 94130.78 | 75308.51 | 82381.70 | 86797.10 |



|                         |                               |          |          |          |          |          |          |
|-------------------------|-------------------------------|----------|----------|----------|----------|----------|----------|
| TC1500002176.mm.1       | Kansl2                        | 491.85   | 469.64   | 449.69   | 363.36   | 326.41   | 417.49   |
| TC1200000303.mm.1       | Snx13                         | 1053.01  | 1065.95  | 904.55   | 820.52   | 808.75   | 871.81   |
| TC1000002195.mm.1       | Serinc1                       | 30570.69 | 29719.25 | 25512.94 | 22503.43 | 22751.18 | 24569.25 |
| TC0700004353.mm.1       | Armxc3                        | 4460.29  | 4205.85  | 3935.44  | 3081.21  | 2894.12  | 3704.71  |
| TC0100003102.mm.1       | Btg2                          | 247.58   | 230.47   | 216.40   | 162.96   | 183.53   | 202.12   |
| TC0100002562.mm.1       | Igfbp5                        | 192.11   | 153.67   | 146.48   | 131.26   | 105.61   | 110.87   |
| TC0100003409.mm.1       | Prrx1                         | 426.08   | 417.03   | 352.56   | 305.00   | 281.62   | 337.41   |
| TC1100003992.mm.1       | Wipi1                         | 524.95   | 498.45   | 475.93   | 385.17   | 269.84   | 378.22   |
| TC0300003013.mm.1       | Dapp1                         | 140.57   | 146.01   | 124.71   | 118.86   | 100.81   | 111.32   |
| TC1400002524.mm.1       | Gm10110                       | 963.26   | 914.21   | 723.29   | 653.85   | 541.59   | 642.65   |
| TC1600000499.mm.1       | Gm10237                       | 28.54    | 26.73    | 26.41    | 24.71    | 20.36    | 19.92    |
| TC1400001672.mm.1       | Nisch                         | 1977.50  | 1966.13  | 1782.31  | 1554.69  | 1551.60  | 1747.11  |
| TC0100002237.mm.1       | Rnf149                        | 521.15   | 489.61   | 424.09   | 376.27   | 332.57   | 398.17   |
| TC0100000131.mm.1       | Efhc1                         | 30.09    | 34.42    | 26.99    | 22.59    | 25.17    | 23.50    |
| TC1700000703.mm.1       | Ier3                          | 2091.10  | 1963.01  | 1741.73  | 1586.01  | 1141.84  | 1384.29  |
| TC0900003310.mm.1       | Lztf1                         | 279.00   | 283.09   | 243.02   | 211.31   | 183.05   | 228.40   |
| TC0600003122.mm.1       | P3h3                          | 248.88   | 225.50   | 191.40   | 162.56   | 148.30   | 179.98   |
| TC1900001265.mm.1       | Smc5                          | 387.76   | 438.60   | 384.96   | 288.72   | 250.37   | 344.10   |
| TC0500003208.mm.1       | Fam216a                       | 268.90   | 255.40   | 256.89   | 204.66   | 177.54   | 231.06   |
| TC1200000173.mm.1       | BC024416;<br>LOC10086171<br>1 | 202.75   | 177.44   | 204.54   | 157.86   | 128.59   | 160.95   |
| TC0X00000373.mm.1       | Mcts1                         | 320.13   | 306.78   | 263.71   | 236.40   | 175.56   | 222.98   |
| TC0700001413.mm.1       | Rab6a                         | 2490.74  | 2498.35  | 2085.43  | 2001.32  | 1847.59  | 1912.60  |
| TC1800000623.mm.1       | Pdgfrb                        | 6881.74  | 6866.11  | 5886.56  | 5250.80  | 5260.08  | 5736.66  |
| TC1200001913.mm.1       | Six4                          | 43.96    | 51.00    | 49.29    | 35.45    | 41.96    | 39.49    |
| TC1300001270.mm.1       | Plpp1                         | 954.11   | 927.19   | 731.75   | 647.70   | 602.05   | 689.59   |
| TC0400003149.mm.1       | Gm10576                       | 544.55   | 607.32   | 491.52   | 421.59   | 311.25   | 414.46   |
| TC0500002889.mm.1       | Gm10047                       | 47.49    | 42.73    | 38.39    | 26.50    | 21.83    | 34.31    |
| TC0100003146.mm.1       | Camsap2                       | 557.24   | 590.69   | 513.17   | 435.60   | 421.66   | 497.66   |
| TC0200001896.mm.1       | Gm17555                       | 199.32   | 221.11   | 238.36   | 162.10   | 115.79   | 167.07   |
| TC1500000705.mm.1       | Tnrc6b;<br>Mir5113            | 167.91   | 174.72   | 148.29   | 130.83   | 129.00   | 144.78   |
| TC1900001588.mm.1       | Mgea5                         | 239.87   | 249.32   | 218.08   | 179.19   | 169.94   | 210.45   |
| TC0X00000213.mm.1       | Cdk16                         | 988.44   | 1011.18  | 874.62   | 751.79   | 751.72   | 857.62   |
| TC0400001517.mm.1       | Sync                          | 161.12   | 159.59   | 154.79   | 120.63   | 108.18   | 142.62   |
| TC1000002775.mm.1       | Tmtc3                         | 557.11   | 622.39   | 480.71   | 397.65   | 342.43   | 447.60   |
| TC0100002836.mm.1       | Stk25                         | 542.59   | 551.51   | 448.03   | 386.02   | 352.60   | 431.37   |
| TC0200004713.mm.1       | Jag1                          | 355.56   | 333.24   | 289.91   | 252.42   | 237.65   | 280.28   |
| TC0100000297.mm.1       | Il1rl2                        | 341.84   | 310.84   | 305.67   | 210.46   | 191.16   | 276.37   |
| TC1200002020.mm.1       | Adam4                         | 105.59   | 105.38   | 105.82   | 76.27    | 93.57    | 66.86    |
| TC0100003301.mm.1       | Mr1                           | 1054.67  | 933.32   | 959.90   | 665.47   | 742.31   | 868.05   |
| TC0X00001285.mm.1       | Armxc4                        | 25.22    | 30.13    | 33.97    | 20.67    | 23.38    | 22.49    |
| TC1500002346.mm.1       | Plec                          | 459.96   | 460.76   | 420.79   | 346.99   | 324.74   | 405.74   |
| TC0300000974.mm.1       | Notch2                        | 1430.82  | 1492.55  | 1295.31  | 1077.11  | 1038.55  | 1261.77  |
| TC1000000420.mm.1       | Gm4795                        | 462.81   | 474.23   | 459.57   | 420.69   | 361.59   | 320.46   |
| TC0X00002751.mm.1       | Phka1                         | 142.76   | 135.51   | 111.81   | 84.86    | 92.51    | 107.97   |
| TC1600000930.mm.1       | Gm21833                       | 2782.52  | 2672.19  | 3073.35  | 2011.83  | 888.13   | 1418.02  |
| TC0100000870.mm.1       | Ackr3                         | 133.10   | 103.67   | 102.47   | 70.47    | 74.21    | 91.96    |
| TC0100000602.mm.1       | Xrcc5                         | 82.97    | 84.08    | 75.35    | 65.41    | 63.16    | 74.03    |
| TC0200002746.mm.1       | Gm14401                       | 405.20   | 396.99   | 421.12   | 315.00   | 233.43   | 332.85   |
| TC1200000636.mm.1       | Mnat1                         | 108.09   | 120.37   | 96.91    | 65.38    | 70.69    | 91.67    |
| TC1700001614.mm.1       | Kctd5                         | 451.79   | 371.50   | 441.54   | 333.09   | 330.18   | 362.38   |
| TSUnmapped00000024.mm.1 | Gm21992                       | 269.70   | 263.91   | 214.82   | 147.81   | 164.39   | 207.06   |
| TC0900000862.mm.1       | Ppib                          | 64619.59 | 67391.88 | 52682.41 | 46744.57 | 50150.90 | 48171.27 |
| TC120000197.mm.1        | Taf1b                         | 192.03   | 190.23   | 178.95   | 148.04   | 150.98   | 174.97   |
| TC0X00001283.mm.1       | Hnrnp2                        | 231.14   | 231.91   | 217.82   | 201.86   | 154.88   | 182.90   |
| TC1000003119.mm.1       | Lrp1                          | 26983.64 | 27411.12 | 24523.46 | 21268.84 | 21383.64 | 24294.73 |
| TC0500002592.mm.1       | Ociad2                        | 51.35    | 53.43    | 52.96    | 35.92    | 42.04    | 47.22    |
| TC1000000842.mm.1       | Midn                          | 375.46   | 388.11   | 319.09   | 305.06   | 246.51   | 285.12   |
| TC0800001977.mm.1       | Mak16                         | 1196.06  | 981.29   | 1059.07  | 854.28   | 729.01   | 913.70   |
| TC1400000843.mm.1       | Mtmr6                         | 1493.20  | 1437.22  | 1261.97  | 1035.20  | 857.61   | 1185.68  |
| TC0900000391.mm.1       | Olfr894                       | 11.62    | 9.85     | 10.57    | 8.38     | 9.30     | 7.26     |
| TC0100002071.mm.1       | Fam135a                       | 199.84   | 208.39   | 175.55   | 145.76   | 131.93   | 170.53   |
| TC1900000373.mm.1       | Klf9                          | 472.02   | 456.39   | 383.83   | 364.35   | 357.86   | 359.80   |
| TC0Y00000255.mm.1       | Gm20815                       | 22.40    | 18.51    | 24.69    | 17.08    | 16.89    | 16.80    |
| TC0500003027.mm.1       | 2900026A02R<br>ik             | 144.43   | 129.43   | 107.81   | 95.11    | 76.54    | 98.95    |
| TC0700003476.mm.1       | Nr2f2                         | 46.90    | 43.50    | 35.77    | 34.45    | 29.68    | 31.92    |
| TC1200000524.mm.1       | Prpf39                        | 240.25   | 279.53   | 215.15   | 176.59   | 200.92   | 193.10   |
| TC1400001422.mm.1       | Gm3715                        | 65.75    | 56.27    | 58.85    | 44.13    | 54.11    | 43.47    |
| TC0700000991.mm.1       | Chsy1                         | 6487.31  | 6274.76  | 5178.97  | 4625.50  | 3821.31  | 4878.73  |
| TC1400000453.mm.1       | Gm8113                        | 47.04    | 35.61    | 38.30    | 26.94    | 33.22    | 28.97    |
| TC1600002094.mm.1       | Rcan1                         | 2180.94  | 2060.79  | 1912.56  | 1594.55  | 1242.39  | 1722.16  |

|                         |               |           |           |           |           |           |           |
|-------------------------|---------------|-----------|-----------|-----------|-----------|-----------|-----------|
| TC1400001275.mm.1       | Gpr180        | 166.27    | 167.97    | 148.60    | 126.00    | 108.22    | 141.78    |
| TC1200000750.mm.1       | Srsf5         | 490.40    | 500.40    | 490.40    | 366.89    | 323.58    | 446.71    |
| TC1100001165.mm.1       | lft20         | 41127.18  | 43796.08  | 36923.43  | 27132.43  | 34703.10  | 32547.05  |
| TC1400000072.mm.1       | Abhd6         | 48.55     | 58.15     | 45.95     | 36.53     | 35.88     | 43.59     |
| TC0100003877.mm.1       | Kdelc1        | 99.24     | 103.73    | 89.42     | 69.60     | 66.43     | 87.29     |
| TC0500003608.mm.1       | Rnf6          | 127.04    | 124.51    | 109.23    | 95.95     | 95.38     | 108.73    |
| TC1600000164.mm.1       | A930007A09Rik | 60.16     | 48.21     | 48.28     | 33.43     | 36.84     | 44.13     |
| TC0400000133.mm.1       | Tmem64        | 212.49    | 214.08    | 190.97    | 142.55    | 183.56    | 164.20    |
| TC1900001323.mm.1       | Glis3         | 200.19    | 201.48    | 167.19    | 164.22    | 146.21    | 154.29    |
| TC1100001149.mm.1       | Rab34         | 324.02    | 308.35    | 293.85    | 231.10    | 240.81    | 286.20    |
| TC0X00002826.mm.1       | Taf9b         | 332.34    | 329.94    | 280.96    | 276.42    | 241.14    | 259.10    |
| TC0100002284.mm.1       | Gm5269        | 59.20     | 47.18     | 51.90     | 40.24     | 24.99     | 36.76     |
| TSUnmapped00000025.mm.1 | Gm21992       | 205.87    | 203.80    | 158.64    | 115.77    | 124.09    | 157.67    |
| TC0300000206.mm.1       | Prkci         | 352.28    | 357.05    | 296.69    | 277.63    | 241.60    | 284.93    |
| TC0200005347.mm.1       | Gm11009       | 172.82    | 182.49    | 178.61    | 144.83    | 82.74     | 116.60    |
| TC0800002908.mm.1       | Ist1          | 491.42    | 474.63    | 432.27    | 358.10    | 363.83    | 429.11    |
| TC1300002327.mm.1       |               | 168.49    | 222.62    | 217.21    | 145.18    | 90.17     | 139.14    |
| TC1600001559.mm.1       | Fam162a       | 162.06    | 155.99    | 151.23    | 118.83    | 113.00    | 145.27    |
| TC0500003371.mm.1       | Gtf2ird1      | 131.22    | 129.30    | 110.29    | 107.05    | 92.73     | 103.68    |
| TC1200002652.mm.1       | lghv1-73      | 21.08     | 24.19     | 18.24     | 13.91     | 16.73     | 16.78     |
| TC0800003015.mm.1       | Mphosph6      | 1119.44   | 1317.94   | 972.25    | 740.29    | 925.56    | 832.21    |
| TC0900000943.mm.1       | Adam10        | 4469.96   | 4431.83   | 3881.07   | 3490.50   | 2636.65   | 3478.16   |
| TC1700000777.mm.1       | Olf111        | 2255.28   | 2739.89   | 1992.97   | 1542.83   | 1461.59   | 1915.21   |
| TC1900001029.mm.1       | Nudt22        | 462.54    | 410.89    | 390.41    | 371.89    | 291.09    | 329.67    |
| TC0600002983.mm.1       | Rpl28-ps4     | 107.74    | 128.67    | 127.98    | 105.21    | 77.20     | 89.09     |
| TC0500001896.mm.1       | Fzd1          | 69.57     | 88.02     | 82.67     | 58.32     | 63.49     | 68.08     |
| TC1200000416.mm.1       | Scfd1         | 943.75    | 882.96    | 764.95    | 629.49    | 551.25    | 747.64    |
| TC0600002423.mm.1       | lil2rb2       | 20.44     | 20.44     | 20.52     | 30.59     | 30.11     | 29.80     |
| TC1100001219.mm.1       | Ccl2          | 34497.96  | 36997.16  | 35359.23  | 96511.84  | 98021.76  | 99701.23  |
| TC0800001094.mm.1       | Mt2           | 55342.99  | 58697.41  | 56068.81  | 211983.40 | 207004.90 | 227609.30 |
| TC0100003280.mm.1       | Npl           | 125.13    | 127.63    | 138.04    | 2874.05   | 2598.69   | 3348.89   |
| TC0600002965.mm.1       | Plxnd1        | 413.42    | 405.13    | 353.89    | 2820.35   | 2720.68   | 2944.91   |
| TC0X00001892.mm.1       | Maob          | 59.83     | 58.78     | 60.40     | 192.90    | 174.86    | 186.16    |
| TC0200000382.mm.1       | lil1rn        | 391.39    | 402.87    | 358.59    | 6404.79   | 5302.52   | 6656.19   |
| TC1100003399.mm.1       | Ccl6          | 728.57    | 621.27    | 678.84    | 8960.44   | 7409.79   | 8183.43   |
| TC1400002162.mm.1       | Phf11b        | 3015.27   | 2886.47   | 3143.04   | 7144.98   | 7101.37   | 7265.84   |
| TC1100004229.mm.1       | Cbr2          | 5717.06   | 5209.81   | 4962.55   | 22646.67  | 23214.75  | 22142.47  |
| TC0600003124.mm.1       | Cd4           | 36.18     | 35.07     | 39.51     | 124.39    | 124.42    | 127.10    |
| TC1100001220.mm.1       | Ccl7          | 78547.94  | 75466.38  | 72810.62  | 198197.40 | 198749.20 | 211197.40 |
| TC1400002161.mm.1       | Phf11a        | 247.08    | 257.13    | 246.51    | 500.69    | 478.52    | 501.11    |
| TC1400001725.mm.1       | Sncg          | 78.35     | 88.79     | 89.75     | 3675.22   | 2582.27   | 3316.89   |
| TC0900002387.mm.1       | lslr          | 58.28     | 50.98     | 54.77     | 358.52    | 424.47    | 382.38    |
| TC0800002905.mm.1       | Hp            | 54.07     | 48.19     | 65.39     | 1515.31   | 1915.58   | 1779.19   |
| TC0600000570.mm.1       | Tmem176a      | 92.95     | 94.52     | 86.84     | 249.98    | 243.35    | 233.55    |
| TC1500000963.mm.1       | Slc48a1       | 3216.22   | 3080.87   | 3203.66   | 5958.07   | 6294.85   | 6248.02   |
| TC1100003573.mm.1       | Gm11545       | 841.51    | 773.84    | 779.98    | 6682.11   | 5362.19   | 6190.04   |
| TC0200001445.mm.1       | Syt13         | 27.26     | 24.87     | 25.34     | 61.68     | 64.45     | 63.81     |
| TC0700004631.mm.1       | Pirb; Pira1   | 1653.13   | 1575.76   | 1572.17   | 3065.66   | 2969.90   | 3121.46   |
| TC0800001095.mm.1       | Mt1           | 14625.28  | 14274.00  | 14430.50  | 39546.73  | 40313.38  | 44640.25  |
| TC0800000297.mm.1       | Sfrp1         | 92.96     | 82.12     | 86.05     | 863.39    | 893.29    | 1114.06   |
| TC0300000060.mm.1       | Fabp5         | 216.36    | 209.78    | 232.60    | 644.51    | 661.04    | 708.51    |
| TC1100003141.mm.1       | Slc13a5       | 21.62     | 21.85     | 21.02     | 33.08     | 32.02     | 32.88     |
| TC0800001737.mm.1       | Gas6          | 26716.06  | 25698.37  | 24754.84  | 56181.01  | 54555.33  | 58433.65  |
| TC0600001403.mm.1       | Clec4n        | 773.53    | 750.83    | 667.36    | 5418.26   | 6546.70   | 5338.34   |
| TC1000001694.mm.1       | Cnksr3        | 116.34    | 119.11    | 119.24    | 171.85    | 168.40    | 175.49    |
| TC0600003109.mm.1       | C1s2          | 12.71     | 14.02     | 13.70     | 32.63     | 35.08     | 33.55     |
| TC0X00001667.mm.1       | Figf          | 209.02    | 198.51    | 192.72    | 484.85    | 449.12    | 484.48    |
| TC0700001631.mm.1       | Ampd3         | 688.09    | 648.74    | 642.28    | 1465.41   | 1360.06   | 1437.84   |
| TC0X00002453.mm.1       | G6pdx         | 3630.76   | 3689.76   | 3417.00   | 6846.11   | 6656.82   | 6927.93   |
| TC0800000621.mm.1       | Hpgd          | 274.57    | 270.93    | 254.97    | 2170.62   | 1879.20   | 2507.07   |
| TC0700003570.mm.1       | Anpep         | 9924.29   | 9942.40   | 9367.61   | 47970.76  | 39243.55  | 43132.48  |
| TC0300001488.mm.1       | Mcoln3        | 42.19     | 38.32     | 40.56     | 82.13     | 83.51     | 85.16     |
| TC0700004165.mm.1       | Arl6ip1       | 4910.70   | 4714.46   | 4713.73   | 7456.71   | 7765.76   | 7480.25   |
| TC1100002195.mm.1       | Igfbp3        | 49.85     | 52.78     | 52.28     | 103.81    | 110.65    | 112.99    |
| TC0500002843.mm.1       | Hpse          | 262.82    | 229.76    | 200.85    | 2443.06   | 2131.93   | 2637.38   |
| TC1100003401.mm.1       | Ccl3          | 17812.49  | 19500.29  | 17440.15  | 45066.48  | 43894.51  | 42877.46  |
| TC1400000316.mm.1       | Mustn1        | 1408.56   | 1333.24   | 1327.08   | 2748.46   | 2554.73   | 2609.11   |
| TC0200003880.mm.1       | Serping1      | 2183.54   | 2022.69   | 2046.66   | 7050.81   | 6185.54   | 7138.52   |
| TC0300002725.mm.1       | Gstm1         | 1956.77   | 1958.34   | 1682.44   | 6560.56   | 6207.40   | 6213.82   |
| TC0300001639.mm.1       | Fabp4         | 358.96    | 303.83    | 389.80    | 2638.05   | 2392.28   | 2865.36   |
| TC1000003214.mm.1       | Lilrb4a       | 187971.30 | 193661.70 | 181764.90 | 295815.30 | 292771.30 | 288269.00 |
| TC1100001222.mm.1       | Ccl12         | 253.80    | 186.95    | 225.18    | 1714.37   | 1608.50   | 1765.39   |
| TC1700000839.mm.1       | Rcan2         | 28.82     | 30.49     | 29.39     | 60.10     | 54.98     | 57.70     |

|                                      |                                                      |          |          |          |          |          |          |
|--------------------------------------|------------------------------------------------------|----------|----------|----------|----------|----------|----------|
| TC0100003099.mm.1                    | Prelp                                                | 6086.40  | 5584.17  | 5416.86  | 27071.29 | 23181.17 | 22565.43 |
| TC1900001027.mm.1                    | Vegfb                                                | 354.91   | 349.30   | 350.90   | 790.85   | 752.82   | 858.08   |
| TC0700003039.mm.1                    | Saa3                                                 | 36.47    | 38.33    | 36.96    | 135.51   | 159.89   | 167.93   |
| TC0700000396.mm.1                    | Ceacam10                                             | 43.15    | 38.29    | 37.36    | 106.15   | 111.49   | 112.48   |
| TC0200002367.mm.1                    | Acss2                                                | 30.85    | 30.72    | 31.29    | 53.97    | 50.79    | 49.95    |
| TC0300001236.mm.1                    | F3                                                   | 1582.17  | 1484.71  | 1234.44  | 18129.59 | 13860.12 | 18328.54 |
| TC1100000859.mm.1                    | Gas7                                                 | 41.69    | 43.01    | 41.85    | 107.05   | 96.35    | 110.90   |
| TC0300002972.mm.1                    | Npnt                                                 | 60.79    | 65.12    | 58.92    | 143.52   | 132.36   | 134.77   |
| TC1100001223.mm.1                    | Ccl8                                                 | 55.77    | 52.24    | 54.34    | 804.75   | 535.71   | 617.84   |
| TC0600002233.mm.1                    | Tmem176b                                             | 443.11   | 453.13   | 397.00   | 1164.68  | 1121.10  | 1226.85  |
| TC0800000845.mm.1                    | Hmox1                                                | 1861.05  | 1658.77  | 1686.59  | 5279.42  | 4826.64  | 5574.56  |
| TC1500001457.mm.1                    | Rspo2                                                | 57.62    | 59.35    | 56.95    | 214.35   | 216.36   | 264.50   |
| TC0700004666.mm.1                    | Fgfr2                                                | 24.68    | 24.80    | 24.71    | 50.02    | 47.60    | 53.85    |
| TC0400003814.mm.1                    | Alpl                                                 | 39.13    | 38.91    | 37.84    | 110.75   | 94.34    | 98.43    |
| TC0800000674.mm.1                    | Tmem192                                              | 1129.77  | 1096.23  | 1103.25  | 1450.40  | 1409.10  | 1448.22  |
| TC1500001729.mm.1                    | Ly6c1                                                | 7968.97  | 8276.53  | 7543.83  | 14356.19 | 14649.19 | 13927.47 |
| TC1000002642.mm.1                    | Dram1                                                | 783.53   | 756.42   | 734.73   | 1431.87  | 1593.64  | 1533.26  |
| TC1600000487.mm.1                    | Mylk                                                 | 44.84    | 46.15    | 44.09    | 83.66    | 76.29    | 81.03    |
| TC1600000328.mm.1                    | Kng1                                                 | 27.18    | 28.67    | 29.86    | 161.36   | 127.02   | 164.74   |
| TC0300000500.mm.1                    | Mme                                                  | 43.84    | 43.03    | 41.36    | 119.75   | 110.84   | 132.65   |
| TC1400001914.mm.1                    | Bmp4                                                 | 39.79    | 37.79    | 40.01    | 74.59    | 81.98    | 82.57    |
| TC0300000137.mm.1                    | Cp                                                   | 31.82    | 35.21    | 33.92    | 63.42    | 63.77    | 60.94    |
| TC0200000245.mm.1                    | Mrc1                                                 | 2831.78  | 2832.35  | 2544.86  | 10085.04 | 8993.53  | 11118.44 |
| TC0500001023.mm.1                    | lbsp                                                 | 31.77    | 30.89    | 36.49    | 1091.46  | 647.88   | 1112.02  |
| TC0600001313.mm.1                    | Cxcl12                                               | 120.58   | 105.87   | 109.10   | 1582.05  | 1028.13  | 1448.17  |
| TC1100001661.mm.1                    | Tmem106a                                             | 4619.78  | 4594.20  | 4368.81  | 9905.37  | 8966.62  | 10203.21 |
| TC1000001011.mm.1                    | 1500009L16Ri<br>k                                    | 29.99    | 36.47    | 38.87    | 234.26   | 187.72   | 203.95   |
| TC1400002641.mm.1                    | Ednrb                                                | 19.83    | 19.90    | 20.61    | 84.27    | 70.04    | 91.33    |
| TC1700002352.mm.1                    | C3                                                   | 107.84   | 101.49   | 95.99    | 337.05   | 286.19   | 340.32   |
| TC0900003344.mm.1                    | Trf                                                  | 590.99   | 521.62   | 539.40   | 1248.44  | 1159.94  | 1261.67  |
| TC1000001066.mm.1                    | Igf1                                                 | 3315.77  | 3677.55  | 3127.98  | 7797.96  | 7650.88  | 7747.76  |
| TC0700004632.mm.1                    | Pira1                                                | 4098.69  | 3962.30  | 3524.68  | 11468.25 | 10415.96 | 11983.05 |
| TC0400002603.mm.1                    | Coro2a                                               | 73.08    | 68.94    | 69.49    | 107.33   | 105.19   | 102.18   |
| TC1000002383.mm.1                    | Gstt1                                                | 27.68    | 24.78    | 23.84    | 65.82    | 59.72    | 62.50    |
| TC1900001419.mm.1                    | Lipa                                                 | 35333.44 | 33519.43 | 32715.60 | 60560.57 | 56154.83 | 59712.43 |
| TC0400000499.mm.1                    | Tmod1                                                | 18.48    | 20.29    | 20.05    | 33.79    | 33.35    | 34.92    |
| TC0600001530.mm.1                    | Clec2d                                               | 7440.41  | 7018.78  | 7113.31  | 14724.97 | 16937.41 | 16666.21 |
| TC0200004843.mm.1                    | Acss1                                                | 60.34    | 61.89    | 57.85    | 106.26   | 98.50    | 99.33    |
| TC0700002696.mm.1                    | Zfp36                                                | 210.36   | 222.16   | 216.59   | 339.89   | 338.67   | 319.51   |
| TC1700001993.mm.1                    | H2-T24                                               | 116.77   | 108.17   | 101.26   | 224.97   | 236.44   | 225.14   |
| TC1000001133.mm.1                    | Hal                                                  | 4910.36  | 5215.57  | 4698.25  | 10146.07 | 9848.45  | 10954.44 |
| TC1_GL456211_random00000019<br>.mm.1 |                                                      | 2957.96  | 2710.23  | 2849.97  | 4898.99  | 4650.24  | 4942.53  |
| TC0700000501.mm.1                    | Gmfg                                                 | 142.88   | 135.57   | 147.17   | 280.78   | 263.04   | 294.46   |
| TC0700004571.mm.1                    | Igf2                                                 | 25.40    | 22.50    | 27.29    | 126.85   | 99.46    | 116.71   |
| TC0600003337.mm.1                    | Arhgdib                                              | 480.75   | 475.80   | 463.51   | 872.74   | 781.78   | 832.09   |
| TC0900000051.mm.1                    | Mmp27                                                | 48.74    | 43.71    | 48.88    | 87.59    | 90.74    | 87.48    |
| TC1600000331.mm.1                    | Adipoq                                               | 21.32    | 20.88    | 20.34    | 57.80    | 57.44    | 48.52    |
| TC0300000647.mm.1                    | Sfrp2                                                | 93.03    | 100.74   | 89.72    | 239.40   | 273.26   | 286.61   |
| TC0300001489.mm.1                    | Mcoln2                                               | 100.01   | 100.99   | 108.31   | 290.99   | 273.37   | 336.87   |
| TC1100002983.mm.1                    | Myocd                                                | 24.29    | 24.64    | 25.05    | 33.71    | 32.33    | 34.17    |
| TC0200002089.mm.1                    | Ism1                                                 | 19.05    | 18.72    | 20.44    | 31.46    | 33.47    | 32.96    |
| TC0800001085.mm.1                    | Gnao1                                                | 40.04    | 40.59    | 41.78    | 61.49    | 57.63    | 61.18    |
| TC0200003164.mm.1                    | Tmem141                                              | 576.87   | 572.19   | 593.76   | 1092.22  | 1020.68  | 1165.95  |
| TC1200000796.mm.1                    | 2410016O06R<br>ik                                    | 21.55    | 23.41    | 22.53    | 34.15    | 35.17    | 33.64    |
| TC1700002152.mm.1                    | Slc29a1                                              | 291.54   | 286.80   | 284.85   | 680.33   | 587.23   | 692.82   |
| TC0100000927.mm.1                    | Sned1;<br>Mir6901                                    | 34.65    | 30.64    | 35.23    | 86.27    | 82.01    | 95.47    |
| TC0X00001682.mm.1                    | Gpm6b                                                | 38.77    | 39.82    | 46.23    | 100.48   | 107.90   | 110.49   |
| TC0700002169.mm.1                    | Cox6b2                                               | 76.28    | 75.12    | 72.18    | 103.64   | 99.32    | 101.99   |
| TC0700004634.mm.1                    | Gm14548;<br>Pira11; Pira2;<br>Pira4; Pira7;<br>Pira1 | 4223.96  | 3809.64  | 3448.11  | 10616.74 | 9744.38  | 10792.14 |
| TC0700000030.mm.1                    | Pira6                                                | 3999.00  | 3904.06  | 3394.60  | 10452.98 | 9516.87  | 11073.08 |
| TC0700000979.mm.1                    | Mcee                                                 | 3714.07  | 3421.46  | 3497.83  | 5289.44  | 5389.13  | 5550.95  |
| TC0900002007.mm.1                    | Dcps                                                 | 407.02   | 403.31   | 419.21   | 593.02   | 640.86   | 599.87   |
| TC1100002003.mm.1                    | Rnf213                                               | 2018.59  | 2148.87  | 1912.33  | 3641.20  | 3501.92  | 3763.08  |
| TC1600000447.mm.1                    | Tfric                                                | 545.10   | 589.96   | 571.83   | 1238.03  | 1086.88  | 1249.16  |
| TC0200004671.mm.1                    | Pcna                                                 | 5438.75  | 5222.50  | 5018.52  | 9395.91  | 8878.92  | 9949.52  |
| TC0100000718.mm.1                    | Ccl20                                                | 42.59    | 37.99    | 41.94    | 68.58    | 70.29    | 69.57    |
| TC1700002151.mm.1                    | Hsp90ab1                                             | 43500.46 | 41474.56 | 42843.60 | 55974.38 | 54114.23 | 55901.65 |

|                   |             |           |           |           |           |           |           |
|-------------------|-------------|-----------|-----------|-----------|-----------|-----------|-----------|
| TC1800001712.mm.1 | Cndp2       | 288.59    | 295.48    | 262.57    | 473.60    | 480.67    | 480.93    |
| TC0300000656.mm.1 | Tmem154     | 344.54    | 337.23    | 375.93    | 1381.29   | 1125.01   | 1500.75   |
| TC1400002836.mm.1 | Dok2        | 77.55     | 78.88     | 73.86     | 191.84    | 162.78    | 194.37    |
| TC0200001546.mm.1 | Lmo2        | 130.75    | 142.31    | 138.91    | 203.40    | 201.37    | 209.62    |
| TC0100002645.mm.1 | Serpine2    | 286.50    | 308.73    | 281.17    | 663.73    | 582.03    | 676.53    |
| TC1200000236.mm.1 | Adi1        | 154.88    | 159.62    | 147.97    | 213.76    | 221.86    | 219.06    |
| TC1100000284.mm.1 | Efemp1      | 34.05     | 26.42     | 33.23     | 236.65    | 174.05    | 248.87    |
| TC1700000402.mm.1 | Tmem8       | 959.42    | 947.44    | 834.69    | 2263.81   | 2258.82   | 2646.38   |
| TC0400001557.mm.1 | Laptm5      | 8161.47   | 7828.66   | 7840.16   | 10321.69  | 10396.87  | 10823.62  |
| TC1200001333.mm.1 | Gm6768      | 516.54    | 482.42    | 526.43    | 821.41    | 886.21    | 898.50    |
| TC0900000950.mm.1 | Aldh1a2     | 47.42     | 54.96     | 53.00     | 105.06    | 98.53     | 105.59    |
| TC1900000552.mm.1 | Plce1       | 43.36     | 45.36     | 41.27     | 85.22     | 76.04     | 84.64     |
| TC0Y00000551.mm.1 | Gm21860     | 1102.99   | 1055.90   | 832.70    | 5654.14   | 7391.50   | 8208.71   |
| TC0Y00000552.mm.1 | Gm21748     | 1102.99   | 1055.90   | 832.70    | 5654.14   | 7391.50   | 8208.71   |
| TC0900000046.mm.1 | Mmp12       | 95.06     | 92.01     | 85.30     | 154.91    | 153.12    | 145.81    |
| TC0200004245.mm.1 | Tcp1111     | 116.05    | 113.26    | 116.58    | 182.25    | 166.49    | 169.24    |
| TC1000002380.mm.1 | Susd2       | 24.68     | 25.23     | 28.57     | 75.41     | 62.97     | 67.02     |
| TC0800003069.mm.1 | Mvd         | 110.17    | 104.38    | 110.51    | 146.41    | 146.32    | 152.36    |
| TC0200001523.mm.1 | Pamr1       | 37.43     | 30.70     | 33.69     | 94.50     | 97.43     | 113.24    |
| TC0900000044.mm.1 | Mmp13       | 5351.20   | 5692.61   | 4566.34   | 17310.93  | 16476.97  | 20272.54  |
| TC0300002374.mm.1 | S100a1      | 7294.78   | 7822.95   | 7221.68   | 15090.51  | 15579.82  | 13525.65  |
| TC1500001531.mm.1 | Enpp2       | 18.27     | 16.85     | 18.49     | 29.83     | 28.02     | 28.44     |
| TC1300001377.mm.1 | Akr1c18     | 17.92     | 23.04     | 20.08     | 240.29    | 166.39    | 288.23    |
| TC1500000344.mm.1 | Emc2        | 29018.63  | 30806.60  | 26680.60  | 60238.57  | 57653.28  | 65196.68  |
| TC0200001859.mm.1 | Sqrdl       | 271.05    | 248.10    | 251.55    | 377.17    | 391.20    | 391.07    |
| TC1000000895.mm.1 | Mfsd12      | 1015.16   | 1036.71   | 893.01    | 3471.33   | 2886.83   | 3759.47   |
| TC1300000147.mm.1 | Sfrp4       | 36.21     | 37.41     | 36.30     | 72.47     | 69.27     | 82.28     |
| TC1000000903.mm.1 | Aes         | 9486.39   | 9209.54   | 8982.30   | 13256.99  | 12427.40  | 13008.08  |
| TC0500001240.mm.1 | Oas1        | 146.32    | 134.51    | 135.09    | 357.97    | 297.04    | 351.58    |
| TC0900001297.mm.1 | Slco2a1     | 159.14    | 157.58    | 143.52    | 299.15    | 268.08    | 281.16    |
| TC1700001954.mm.1 | Tnf         | 1773.38   | 1755.51   | 1500.68   | 3417.16   | 3555.76   | 3558.04   |
| TC1000000729.mm.1 | Chchd10     | 46.24     | 44.86     | 44.01     | 95.60     | 82.25     | 96.28     |
| TC0600001890.mm.1 | Tfec        | 793.16    | 749.46    | 682.19    | 1941.61   | 1684.05   | 2017.84   |
| TC0700002635.mm.1 | Ceacam1     | 84.29     | 86.59     | 85.14     | 185.93    | 201.63    | 233.58    |
| TC1400000513.mm.1 | Lgals3      | 124.15    | 126.37    | 130.15    | 280.98    | 234.36    | 260.72    |
| TC1000000718.mm.1 | Ggt5        | 26.68     | 22.36     | 23.57     | 51.27     | 48.27     | 49.11     |
| TC0700004351.mm.1 | Pycard      | 52.67     | 49.10     | 53.73     | 83.59     | 79.70     | 86.64     |
| TC0700004516.mm.1 | Ifitm6      | 153.07    | 150.47    | 147.94    | 835.03    | 570.09    | 800.35    |
| TC1000001189.mm.1 | Dcn         | 48.53     | 47.03     | 45.75     | 80.62     | 78.52     | 89.57     |
| TC0800000711.mm.1 | Atp6v1b2    | 1993.71   | 2026.75   | 1837.81   | 3333.70   | 3072.22   | 3258.01   |
| TC0300000419.mm.1 | Dclk1       | 44.20     | 40.12     | 43.56     | 78.18     | 76.90     | 87.17     |
| TC0500003219.mm.1 | Camkk2      | 81.81     | 83.22     | 85.40     | 145.67    | 132.20    | 151.04    |
| TC0700001475.mm.1 | Olfr583     | 10.10     | 10.97     | 10.33     | 16.75     | 16.86     | 15.60     |
| TC1600000746.mm.1 | Abi3bp      | 112.83    | 119.64    | 102.02    | 343.54    | 274.85    | 310.58    |
| TC1400002098.mm.1 | Tgm1        | 38.59     | 42.27     | 40.98     | 73.77     | 66.62     | 74.41     |
| TC0100001597.mm.1 | Cd48        | 1957.40   | 1906.77   | 1927.96   | 3629.02   | 3283.24   | 3874.20   |
| TC0500001584.mm.1 | Por         | 254.12    | 242.16    | 232.04    | 474.36    | 434.25    | 508.00    |
| TC1700002313.mm.1 | Plin4       | 17.03     | 18.23     | 18.50     | 28.01     | 28.05     | 30.49     |
| TC1200001602.mm.1 | Prkar2b     | 143.89    | 140.73    | 131.30    | 362.21    | 321.65    | 413.00    |
| TC1300001326.mm.1 | Emb         | 479.59    | 412.30    | 404.92    | 1127.86   | 962.17    | 1041.24   |
| TC1100003397.mm.1 | Ccl9        | 2758.89   | 2748.91   | 2223.95   | 7313.62   | 6559.46   | 6636.44   |
| TC1100004227.mm.1 | Stra13      | 2418.72   | 2585.65   | 2416.26   | 3825.32   | 4036.30   | 3666.13   |
| TC0500000850.mm.1 | Cxcl2       | 128.69    | 125.67    | 114.03    | 200.14    | 206.63    | 195.87    |
| TC0700004635.mm.1 | Lilra6      | 337.91    | 285.33    | 297.69    | 653.31    | 592.62    | 630.81    |
| TC0500001648.mm.1 | Nxpe5       | 343.68    | 365.67    | 333.92    | 1057.27   | 816.52    | 997.53    |
| TC1100003055.mm.1 | Cd68        | 284925.30 | 288164.60 | 273898.90 | 407490.20 | 379769.20 | 408070.80 |
| TC1400001785.mm.1 | Fam213a     | 74.13     | 76.43     | 70.64     | 117.70    | 112.21    | 107.52    |
| TC1100003779.mm.1 | Dhx58       | 228.45    | 213.69    | 195.78    | 402.66    | 376.02    | 409.56    |
| TC0500003180.mm.1 | Oas1g       | 577.39    | 603.90    | 529.05    | 982.69    | 1052.29   | 1096.01   |
| TC0600001639.mm.1 | Mgst1       | 101.14    | 98.03     | 96.10     | 179.73    | 156.06    | 174.36    |
| TC0500001251.mm.1 | Pop5        | 68.67     | 68.26     | 70.91     | 89.45     | 90.86     | 95.77     |
| TC0400001639.mm.1 | Stmn1       | 177.99    | 181.58    | 176.64    | 259.55    | 241.18    | 265.28    |
| TC1200001974.mm.1 | Tmem229b    | 90.11     | 96.06     | 90.98     | 121.76    | 122.56    | 127.67    |
| TC0600002996.mm.1 | Ret         | 56.65     | 44.97     | 50.18     | 148.08    | 133.05    | 165.06    |
| TC0700004285.mm.1 | Cln3        | 288.50    | 286.23    | 264.77    | 404.75    | 396.33    | 418.68    |
| TC1500001730.mm.1 | Ly6c2       | 64474.05  | 61439.24  | 54010.53  | 111287.70 | 114231.70 | 116978.50 |
| TC0700003942.mm.1 | Trim30c     | 31.77     | 31.59     | 31.85     | 39.98     | 42.66     | 43.08     |
| TC0700003464.mm.1 | Arrdc4      | 45.99     | 50.26     | 50.23     | 84.00     | 77.77     | 87.33     |
| TC0300000880.mm.1 | Selenbp1    | 48.52     | 48.00     | 49.39     | 65.06     | 60.67     | 63.20     |
| TC0500002895.mm.1 | Gbp10; Gbp6 | 56.33     | 52.92     | 52.79     | 105.47    | 94.51     | 90.78     |
| TC0800000707.mm.1 | Lpl         | 61.94     | 56.52     | 49.83     | 342.51    | 228.60    | 323.82    |
| TC0600001279.mm.1 | Pparg       | 99.97     | 104.90    | 100.55    | 306.34    | 265.41    | 366.87    |
| TC0200002869.mm.1 | Mcm10       | 52.79     | 53.13     | 52.40     | 75.40     | 71.01     | 78.66     |
| TC0200005290.mm.1 | Zbp1        | 485.79    | 480.79    | 460.28    | 860.79    | 881.28    | 1022.15   |

|                   |                    |          |          |          |          |          |          |
|-------------------|--------------------|----------|----------|----------|----------|----------|----------|
| TC1700001299.mm.1 | Epas1              | 237.68   | 234.89   | 213.31   | 781.86   | 638.51   | 892.50   |
| TC1300000838.mm.1 | Fastkd3            | 80.34    | 84.74    | 79.94    | 104.68   | 109.66   | 109.14   |
| TC1100001875.mm.1 | Ttyh2              | 5156.21  | 5084.81  | 4536.89  | 7962.78  | 8150.79  | 7883.92  |
| TC0500001382.mm.1 | Hvcn1              | 54.05    | 48.09    | 45.19    | 129.76   | 109.01   | 130.48   |
| TC1500000580.mm.1 | Grina              | 10905.96 | 11445.36 | 9783.24  | 18507.93 | 18226.37 | 18943.33 |
| TC0800003068.mm.1 | Cyba               | 10333.51 | 9714.65  | 8908.57  | 18380.49 | 17121.23 | 19294.06 |
| TC1100000822.mm.1 | Pmp22              | 39903.70 | 37430.43 | 35509.57 | 55413.50 | 56524.91 | 57425.10 |
| TC1100001156.mm.1 | Aldoc              | 37.02    | 38.08    | 33.53    | 62.76    | 62.72    | 69.23    |
| TC0700000242.mm.1 | Ptgir              | 23.83    | 25.77    | 25.08    | 54.43    | 53.23    | 66.21    |
| TC1700000652.mm.1 | Neu1               | 44.82    | 44.17    | 41.89    | 57.67    | 60.34    | 61.24    |
| TC0600003084.mm.1 | Clec4e             | 634.84   | 660.15   | 610.08   | 1469.92  | 1245.40  | 1550.40  |
| TC1500000002.mm.1 | Sepp1              | 1222.30  | 1254.36  | 1231.42  | 2006.12  | 1776.50  | 1960.32  |
| TC0400001677.mm.1 | Id3                | 56.96    | 59.39    | 65.47    | 128.04   | 110.57   | 118.82   |
| TC0600003108.mm.1 | C1s1               | 16.08    | 17.20    | 17.76    | 50.61    | 47.78    | 65.52    |
| TC1200001747.mm.1 | Sptssa;<br>Mir1892 | 1380.31  | 1291.08  | 1237.19  | 2080.20  | 2320.17  | 2299.79  |
| TC0800000645.mm.1 | Aadat              | 15.33    | 13.82    | 14.51    | 21.38    | 20.64    | 21.66    |
| TC0500002919.mm.1 | Tgfb3              | 160.43   | 145.68   | 137.92   | 384.68   | 311.42   | 348.84   |
| TC0500001796.mm.1 | Ras11a             | 26.05    | 27.53    | 30.53    | 51.86    | 59.10    | 57.90    |
| TC0X00003113.mm.1 | Chrdl1             | 49.67    | 48.21    | 50.19    | 67.22    | 64.82    | 70.67    |
| TC1100001634.mm.1 | Atp6v0a1           | 2202.75  | 2164.10  | 2150.48  | 4186.57  | 3723.44  | 4534.12  |
| TC1900000767.mm.1 | Adra2a             | 39.11    | 36.01    | 38.92    | 67.61    | 59.41    | 65.26    |
| TC0600002644.mm.1 | Anxa4              | 4963.88  | 4489.11  | 4477.51  | 7295.11  | 7275.09  | 7893.07  |
| TC1200002411.mm.1 | Ckb                | 137.91   | 138.40   | 133.42   | 201.06   | 189.29   | 211.99   |
| TC1200001047.mm.1 | Serpina3n          | 18.63    | 18.77    | 18.11    | 32.16    | 28.90    | 28.06    |
| TC0200001645.mm.1 | Olfr1284           | 11.66    | 12.14    | 11.90    | 16.73    | 15.39    | 15.90    |
| TC0X00001934.mm.1 | Cfp                | 10866.63 | 10177.36 | 9579.14  | 17170.61 | 16207.47 | 15874.72 |
| TC0500003181.mm.1 | Oas1a              | 2436.91  | 2576.03  | 2215.69  | 4883.67  | 4468.66  | 5247.54  |
| TC1900001729.mm.1 | Shtn1              | 161.86   | 153.94   | 154.26   | 276.83   | 239.18   | 263.27   |
| TC0400004097.mm.1 | Kcnab2             | 113.12   | 104.99   | 99.23    | 171.38   | 161.53   | 168.43   |
| TC1900000501.mm.1 | Ifit3              | 138.04   | 106.71   | 133.29   | 340.70   | 320.68   | 375.35   |
| TC0600000392.mm.1 | Rab19              | 36.72    | 34.34    | 34.90    | 57.77    | 65.11    | 68.34    |
| TC0600001229.mm.1 | Lmcd1              | 53.01    | 44.64    | 47.18    | 150.22   | 142.88   | 196.33   |
| TC0600001092.mm.1 | Slc6a6             | 18618.06 | 19054.49 | 17135.52 | 27600.63 | 27285.84 | 29395.90 |
| TC0700000786.mm.1 | Klk1b11            | 21.23    | 21.60    | 20.92    | 60.75    | 45.58    | 55.67    |
| TC0700001630.mm.1 | Adm                | 79.43    | 85.34    | 92.70    | 460.27   | 339.08   | 559.01   |
| TC0700003943.mm.1 | Trim30a            | 1362.87  | 1429.87  | 1218.44  | 2284.30  | 2253.67  | 2396.70  |
| TC1400001054.mm.1 | Lcp1               | 5938.32  | 6089.53  | 5911.61  | 8440.17  | 7732.04  | 8338.16  |
| TC1300000157.mm.1 | Aoah               | 670.45   | 814.91   | 657.26   | 2043.86  | 1732.66  | 2150.01  |
| TC1200002525.mm.1 | Serpina3g          | 36.89    | 35.69    | 45.75    | 99.21    | 90.85    | 93.52    |
| TC1700000833.mm.1 | Adgrf5             | 89.49    | 81.65    | 72.04    | 160.58   | 161.91   | 172.37   |
| TC0800000096.mm.1 | Arhgef7            | 360.35   | 343.38   | 350.12   | 549.99   | 496.26   | 557.30   |
| TC0400001259.mm.1 | Prdx1              | 1049.19  | 1034.43  | 971.48   | 1390.57  | 1349.67  | 1432.69  |
| TC0800000172.mm.1 | Agpat5             | 571.92   | 575.40   | 586.02   | 828.88   | 813.37   | 912.27   |
| TC1100002649.mm.1 | Tgtp2              | 99.01    | 117.52   | 102.88   | 253.64   | 246.86   | 308.62   |
| TC0800001112.mm.1 | Cpne2              | 765.63   | 705.71   | 676.53   | 1400.20  | 1207.34  | 1290.58  |
| TC0200001851.mm.1 | Gm14085            | 104.41   | 105.94   | 106.69   | 150.20   | 144.04   | 161.63   |
| TC0X00000961.mm.1 | Gdpd2              | 22.97    | 23.17    | 25.06    | 36.17    | 35.01    | 33.34    |
| TC0700004610.mm.1 | Ccnd1;<br>Mir3962  | 1600.22  | 1573.93  | 1451.66  | 2711.20  | 2707.93  | 3148.82  |
| TC0600002917.mm.1 | Camk1              | 264.98   | 253.77   | 254.93   | 332.89   | 340.52   | 361.31   |
| TC0100003743.mm.1 | Mark1              | 96.81    | 91.30    | 90.73    | 244.42   | 195.22   | 258.49   |
| TC0100000524.mm.1 | Adam23             | 196.56   | 180.55   | 163.85   | 349.29   | 342.00   | 391.92   |
| TC0700004633.mm.1 | Gm15448            | 2914.36  | 2672.94  | 2410.64  | 6443.61  | 5359.24  | 6250.95  |
| TC1000000784.mm.1 | Cstb               | 40918.73 | 43648.63 | 44011.80 | 64018.78 | 60815.11 | 67921.94 |
| TC0200000037.mm.1 | Phyh               | 440.06   | 402.53   | 391.73   | 657.68   | 632.39   | 606.44   |
| TC1400001709.mm.1 | Wdfy4              | 143.98   | 139.40   | 130.16   | 248.05   | 219.08   | 253.96   |
| TC0X00000126.mm.1 | Tspan7             | 48.32    | 54.40    | 49.05    | 74.30    | 76.50    | 78.74    |
| TC0500003395.mm.1 | Hip1               | 341.73   | 335.52   | 291.83   | 631.46   | 590.76   | 689.69   |
| TC0700003592.mm.1 | Man2a2             | 206.43   | 188.27   | 180.64   | 410.33   | 347.92   | 418.33   |
| TC1700002814.mm.1 | C4b                | 51.67    | 56.68    | 51.59    | 99.41    | 85.18    | 93.59    |
| TC1300001806.mm.1 | Lymr4              | 568.37   | 538.97   | 609.66   | 867.48   | 822.55   | 856.26   |
| TC1100004282.mm.1 | Mfsd11             | 643.05   | 643.17   | 585.65   | 897.38   | 859.46   | 906.49   |
| TC0500003284.mm.1 | Slc15a4            | 544.37   | 527.54   | 532.03   | 780.08   | 769.68   | 873.33   |
| TC0500002411.mm.1 | Lgi2               | 21.86    | 18.09    | 24.91    | 68.31    | 56.75    | 66.24    |
| TC1500002246.mm.1 | Smagp              | 52.90    | 49.45    | 49.50    | 73.53    | 77.13    | 69.50    |
| TC1700000694.mm.1 | Cdsn               | 63.12    | 72.92    | 71.45    | 135.18   | 169.30   | 150.79   |
| TC1300002047.mm.1 | Hk3                | 367.40   | 364.20   | 338.86   | 698.45   | 618.50   | 765.54   |
| TC0500003176.mm.1 | Oas3               | 208.93   | 194.80   | 162.34   | 488.51   | 415.17   | 476.77   |
| TC0900003062.mm.1 | Ndufaf3            | 181.29   | 184.99   | 173.29   | 279.24   | 249.94   | 277.36   |
| TC1700000936.mm.1 | B430306N03R<br>ik  | 94.38    | 76.13    | 86.72    | 228.45   | 183.75   | 203.24   |
| TC0800002824.mm.1 | Atp6v0d1           | 16994.91 | 15394.26 | 14413.85 | 24682.17 | 25695.04 | 25581.53 |
| TC1800001197.mm.1 | Cd14               | 1362.47  | 1217.04  | 1132.36  | 2297.69  | 2148.81  | 2400.09  |

|                                      |                   |           |           |           |           |           |           |
|--------------------------------------|-------------------|-----------|-----------|-----------|-----------|-----------|-----------|
| TC0600003335.mm.1                    | Mgp               | 6368.95   | 4969.65   | 6598.70   | 36534.67  | 25115.00  | 42110.59  |
| TC1100001592.mm.1                    | Igfbp4            | 1812.56   | 1583.46   | 1498.41   | 3967.77   | 3281.73   | 3967.56   |
| TC1200000225.mm.1                    | Cmpk2             | 87.53     | 104.40    | 101.22    | 204.38    | 183.51    | 178.90    |
| TC1600001280.mm.1                    | Sdf2l1            | 3665.82   | 2855.60   | 2989.53   | 8738.84   | 7331.17   | 7548.07   |
| TC1800001744.mm.1                    | Arhgap26          | 34.71     | 35.68     | 33.76     | 45.12     | 49.50     | 46.59     |
| TC1100002155.mm.1                    | Pold2             | 245.50    | 238.55    | 230.35    | 310.67    | 300.36    | 322.80    |
| TC1100001586.mm.1                    | Cdc6              | 41.48     | 40.90     | 41.77     | 58.90     | 53.88     | 60.18     |
| TC1600001134.mm.1                    | Coro7             | 185.17    | 169.33    | 167.59    | 319.05    | 274.12    | 313.26    |
| TC1700000351.mm.1                    | Msrb1             | 1775.21   | 1689.35   | 1587.65   | 2909.83   | 2554.15   | 2861.72   |
| TC1200001110.mm.1                    | Evl               | 346.03    | 338.30    | 317.36    | 500.31    | 491.16    | 553.53    |
| TC0100002324.mm.1                    | Mfsd6             | 300.56    | 333.64    | 284.95    | 543.34    | 491.55    | 540.76    |
| TC1900000175.mm.1                    | Pcna-ps2          | 51818.63  | 45230.48  | 41434.75  | 89982.54  | 90489.31  | 100814.90 |
| TC0900001243.mm.1                    | Faim              | 77.99     | 85.50     | 81.01     | 107.34    | 106.00    | 110.76    |
| TC0900002113.mm.1                    | Sorl1             | 36.43     | 36.11     | 36.52     | 51.34     | 47.49     | 53.50     |
| TC0200004363.mm.1                    | Grem1             | 115.45    | 96.26     | 78.88     | 269.82    | 310.72    | 296.48    |
| TC1300000543.mm.1                    | Rnf144b           | 56.36     | 50.48     | 50.29     | 85.90     | 88.81     | 99.79     |
| TC0200001036.mm.1                    | Hat1              | 213.53    | 198.41    | 204.29    | 351.64    | 302.48    | 340.12    |
| TC0700002002.mm.1                    | Paox              | 71.99     | 67.94     | 72.82     | 95.52     | 104.29    | 96.53     |
| TC1300001155.mm.1                    | Cd180             | 5792.56   | 5677.77   | 5350.12   | 9185.86   | 8428.32   | 9891.94   |
| TC0200003146.mm.1                    | Dpp7              | 770.89    | 686.29    | 672.22    | 1212.45   | 1165.48   | 1337.99   |
| TC0800002757.mm.1                    | Slc38a7           | 248.48    | 229.43    | 225.31    | 430.91    | 421.32    | 515.29    |
| TC1700002815.mm.1                    | C4a               | 26.22     | 27.13     | 26.76     | 39.67     | 35.44     | 36.50     |
| TC1500001431.mm.1                    | Lrp12             | 1207.07   | 1124.53   | 994.22    | 1913.09   | 1857.87   | 1938.66   |
| TC0500001992.mm.1                    | Cd36              | 7007.11   | 6924.82   | 6333.20   | 10640.58  | 10049.59  | 11440.19  |
| TC1000002453.mm.1                    | Pdxk              | 419.22    | 417.62    | 349.41    | 853.21    | 833.64    | 1024.62   |
| TC0400002251.mm.1                    | Ripk2             | 1209.38   | 1248.85   | 1134.73   | 1638.97   | 1592.51   | 1701.70   |
| TC0200002223.mm.1                    | Cst7              | 41.01     | 47.25     | 42.75     | 94.78     | 112.69    | 130.34    |
| TC0300002716.mm.1                    | Ahcy1             | 1857.40   | 2014.78   | 1764.93   | 2674.11   | 2697.13   | 2754.61   |
| TC0500001380.mm.1                    | Ppp1cc            | 15095.44  | 14759.76  | 13687.05  | 19234.77  | 19000.14  | 19146.55  |
| TC1200000838.mm.1                    | Batf              | 51.46     | 51.19     | 52.34     | 85.73     | 89.29     | 105.40    |
| TC0700002617.mm.1                    | Atp1a3            | 281.22    | 259.60    | 242.68    | 545.37    | 452.29    | 489.25    |
| TC0100003528.mm.1                    | Sdhc              | 1903.49   | 1752.76   | 1699.60   | 2917.97   | 2648.75   | 3000.38   |
| TC0200001365.mm.1                    | Rapsn             | 27.83     | 23.67     | 27.17     | 50.22     | 56.65     | 47.41     |
| TC0800000937.mm.1                    | Asf1b             | 1431.52   | 1525.55   | 1357.50   | 2385.49   | 2205.08   | 2557.60   |
| TC0600003212.mm.1                    | Clec2j            | 46.56     | 49.31     | 47.53     | 77.20     | 69.38     | 81.41     |
| TC0800002799.mm.1                    | Cmtm4             | 206.56    | 205.46    | 182.93    | 287.24    | 284.98    | 283.95    |
| TC0300002722.mm.1                    | Gstm7             | 38.91     | 41.12     | 37.17     | 51.05     | 51.86     | 50.97     |
| TC1_GL456221_random00000014<br>.mm.1 |                   | 3014.00   | 2670.37   | 2853.86   | 4932.95   | 4301.14   | 4755.67   |
| TC0700004487.mm.1                    | Adam8             | 6513.21   | 6458.44   | 5702.93   | 9981.24   | 9745.09   | 10866.75  |
| TC1100001264.mm.1                    | Wfdc17            | 48681.30  | 51577.43  | 54056.39  | 119932.60 | 94011.02  | 101579.40 |
| TC0800001182.mm.1                    | Cmtm3             | 11809.29  | 11192.32  | 10191.24  | 17907.03  | 18020.20  | 20139.79  |
| TC1500001596.mm.1                    | E430025E21Ri<br>k | 6439.27   | 6586.43   | 5872.91   | 9250.05   | 9002.94   | 9834.31   |
| TC1900001418.mm.1                    | Ch25h             | 54213.13  | 49076.66  | 46993.86  | 79897.03  | 77574.75  | 86620.56  |
| TC1300002506.mm.1                    | Tmem171           | 69.51     | 64.83     | 70.01     | 141.20    | 139.12    | 114.34    |
| TC1000001506.mm.1                    | Avpr1a            | 85.20     | 78.14     | 90.95     | 129.79    | 130.56    | 140.08    |
| TC0300001409.mm.1                    | Adh1              | 19.76     | 18.47     | 20.35     | 32.13     | 36.32     | 39.69     |
| TC0600000765.mm.1                    | Ndnf              | 45.65     | 42.17     | 39.97     | 76.31     | 66.27     | 75.68     |
| TC0100000766.mm.1                    | Sp100             | 761.58    | 828.56    | 740.80    | 1158.39   | 1074.96   | 1161.86   |
| TC0900002823.mm.1                    | Tbcd2b            | 430.09    | 440.56    | 396.12    | 618.85    | 646.22    | 702.85    |
| TC1100002567.mm.1                    | Pttg1             | 118.21    | 109.37    | 103.91    | 165.89    | 185.95    | 169.85    |
| TC1300000016.mm.1                    | Akr1c14           | 17.78     | 16.80     | 16.65     | 21.71     | 21.77     | 20.77     |
| TC0600003503.mm.1                    | Herc6             | 218.99    | 220.77    | 198.76    | 293.20    | 297.21    | 285.38    |
| TC0200003354.mm.1                    | Phf19             | 71.14     | 65.68     | 67.78     | 88.23     | 90.29     | 95.48     |
| TC1400002067.mm.1                    | Slc7a8            | 4880.06   | 5023.98   | 4206.83   | 8203.25   | 7596.59   | 8034.66   |
| TC1100003574.mm.1                    | Tmem92            | 21.04     | 21.25     | 21.40     | 29.00     | 27.65     | 26.20     |
| TC0600002056.mm.1                    | Wdr91             | 377.46    | 383.68    | 375.18    | 524.07    | 492.98    | 559.13    |
| TC0100002827.mm.1                    | Kif1a             | 96.51     | 92.89     | 89.74     | 153.31    | 135.12    | 158.98    |
| TC0100002285.mm.1                    | Slc40a1           | 25.26     | 25.48     | 23.86     | 54.10     | 43.83     | 57.02     |
| TC1600001071.mm.1                    | Ets2              | 122.68    | 119.53    | 106.61    | 209.25    | 181.49    | 196.36    |
| TC0200000477.mm.1                    | Rxra              | 416.19    | 393.16    | 380.16    | 521.78    | 517.06    | 551.91    |
| TC0700003990.mm.1                    | Tpp1              | 9902.88   | 9368.83   | 7987.44   | 16292.25  | 16514.70  | 18051.12  |
| TC1900001030.mm.1                    | Fermt3            | 400.40    | 391.10    | 372.25    | 620.82    | 542.92    | 617.74    |
| TC0X00001533.mm.1                    | Hsd17b10          | 1309.96   | 1380.56   | 1189.42   | 2137.41   | 1930.59   | 2056.07   |
| TC0100003738.mm.1                    | 42430             | 22.65     | 20.16     | 23.40     | 47.27     | 49.44     | 39.35     |
| TC1900000502.mm.1                    | Ifit3b            | 85.72     | 66.66     | 84.62     | 207.00    | 231.97    | 178.81    |
| TC1600001387.mm.1                    | King2             | 71.66     | 79.26     | 62.57     | 157.65    | 144.80    | 181.57    |
| TC0200000888.mm.1                    | Pkp4              | 203.78    | 199.69    | 190.50    | 329.66    | 281.79    | 320.33    |
| TC1400000968.mm.1                    | Stc1              | 73.15     | 74.39     | 79.91     | 146.10    | 171.02    | 200.29    |
| TC0600000577.mm.1                    | Gpnmb             | 145687.50 | 147499.40 | 127327.60 | 219215.30 | 238993.80 | 250499.80 |
| TC0800001511.mm.1                    | Dpep1             | 182.55    | 182.43    | 164.81    | 283.25    | 257.79    | 297.22    |
| TC0500003573.mm.1                    | Tecpr1            | 32.23     | 30.93     | 31.67     | 44.68     | 39.97     | 43.09     |
| TC0400001856.mm.1                    | Dhrs3             | 4636.91   | 4546.09   | 4305.48   | 6086.68   | 5643.09   | 6019.29   |

|                   |                   |          |          |          |           |           |           |
|-------------------|-------------------|----------|----------|----------|-----------|-----------|-----------|
| TC190000102.mm.1  | Batf2             | 44.10    | 43.47    | 43.52    | 63.38     | 55.95     | 61.48     |
| TC080000564.mm.1  | Dctd              | 64.89    | 65.58    | 64.47    | 90.62     | 81.07     | 85.38     |
| TC0700002102.mm.1 | Dhcr7             | 92.28    | 89.46    | 88.91    | 132.87    | 119.86    | 137.69    |
| TC1100001071.mm.1 | Scarf1            | 54.61    | 55.38    | 54.20    | 85.52     | 74.41     | 85.86     |
| TC0200005181.mm.1 | Znfx1             | 340.82   | 336.63   | 314.84   | 499.76    | 446.34    | 496.82    |
| TC0500003404.mm.1 | Tmem120a          | 142.43   | 142.14   | 144.10   | 193.85    | 187.97    | 213.58    |
| TC0900001048.mm.1 | Gsta4             | 124.31   | 142.73   | 122.87   | 271.07    | 226.46    | 280.16    |
| TC1700000214.mm.1 | Fpr2; Fpr3        | 38.71    | 44.37    | 43.18    | 65.81     | 77.13     | 77.09     |
| TC1700001522.mm.1 | Fpr1              | 29.79    | 26.85    | 31.90    | 66.60     | 52.81     | 57.83     |
| TC0400002744.mm.1 | Ptgr1             | 239.19   | 235.54   | 237.26   | 320.88    | 291.49    | 322.01    |
| TC1700000657.mm.1 | Lsm2              | 90.23    | 85.78    | 86.97    | 130.41    | 116.11    | 132.51    |
| TC1000003213.mm.1 | Lilr4b            | 74869.23 | 82578.41 | 74675.27 | 124391.50 | 109173.80 | 120754.00 |
| TC1100003807.mm.1 | Vat1              | 174.06   | 176.26   | 156.03   | 305.98    | 257.84    | 289.16    |
| TC0100003889.mm.1 | Mnda              | 2602.24  | 2718.34  | 2443.70  | 3910.60   | 3527.92   | 3916.89   |
| TC0900002724.mm.1 | Mb21d1            | 58.24    | 54.43    | 57.84    | 83.97     | 74.51     | 79.62     |
| TC1600000367.mm.1 | Tprg              | 12.84    | 12.68    | 12.94    | 18.41     | 21.35     | 18.36     |
| TC0200001849.mm.1 | Slc28a2           | 176.07   | 171.68   | 163.72   | 234.81    | 226.38    | 254.91    |
| TC0700003831.mm.1 | P2ry2             | 248.26   | 236.95   | 221.58   | 363.32    | 334.13    | 383.72    |
| TC0700001624.mm.1 | Wee1              | 298.08   | 279.85   | 266.76   | 375.25    | 384.33    | 405.58    |
| TC1200001544.mm.1 | Id2               | 6563.60  | 6590.09  | 5305.90  | 10961.40  | 10880.67  | 11216.55  |
| TC0400002873.mm.1 | Tmem261           | 1422.08  | 1427.42  | 1542.43  | 3269.83   | 2497.82   | 2846.53   |
| TC1400002869.mm.1 | Phf11d;<br>Phf11c | 480.10   | 422.05   | 426.46   | 1204.26   | 886.71    | 1210.44   |
| TC0700000458.mm.1 | Blvrb             | 490.34   | 428.33   | 392.88   | 994.20    | 805.74    | 967.79    |
| TC1700002225.mm.1 | Nfya              | 181.61   | 171.44   | 179.58   | 240.66    | 219.68    | 236.99    |
| TC0700002143.mm.1 | Lair1             | 512.06   | 508.95   | 473.39   | 757.74    | 671.85    | 756.34    |
| TC1900001551.mm.1 | Erlin1            | 471.13   | 475.06   | 449.90   | 653.63    | 586.20    | 622.46    |
| TC0600001371.mm.1 | Slc6a12           | 31.62    | 29.99    | 30.97    | 38.67     | 43.13     | 41.52     |
| TC0700000853.mm.1 | Bcat2             | 139.20   | 134.05   | 125.76   | 171.80    | 181.97    | 185.71    |
| TC0300001244.mm.1 | Gclm              | 1190.97  | 1096.69  | 1054.63  | 2243.60   | 1831.32   | 1896.77   |
| TC1100000094.mm.1 | Zmiz2             | 371.44   | 368.24   | 344.00   | 529.66    | 472.86    | 518.48    |
| TC1600001770.mm.1 | St3gal6           | 35.07    | 31.19    | 32.54    | 42.90     | 44.26     | 44.50     |
| TC1000002714.mm.1 | Plxnc1            | 1280.80  | 1265.38  | 1149.64  | 1938.41   | 1735.54   | 1982.50   |
| TC1500000667.mm.1 | Polr2f            | 58150.89 | 55365.24 | 56122.91 | 79645.09  | 71599.54  | 79894.39  |
| TC1800001198.mm.1 | Ndufa2            | 2713.35  | 2789.33  | 2490.76  | 4055.73   | 3671.54   | 4119.96   |
| TC0900001781.mm.1 | Panx1             | 54.21    | 60.61    | 60.13    | 83.63     | 77.88     | 81.27     |
| TC1400002160.mm.1 | Gm6904            | 134.31   | 149.80   | 168.98   | 259.28    | 275.81    | 254.52    |
| TC0X00001371.mm.1 | Rnf128            | 901.65   | 823.50   | 715.54   | 1584.86   | 1416.48   | 1660.86   |
| TC1700001154.mm.1 | Ehd3              | 64.31    | 66.27    | 60.31    | 95.02     | 84.99     | 88.21     |
| TC1100002643.mm.1 | Gm12185;<br>Tgtp1 | 67.20    | 66.60    | 63.30    | 133.10    | 104.65    | 129.42    |
| TC0400003900.mm.1 | Kazn              | 27.82    | 25.94    | 27.46    | 38.35     | 36.52     | 34.46     |
| TC1900001770.mm.1 | Taf6l             | 58.05    | 54.05    | 53.72    | 71.00     | 69.70     | 75.06     |
| TC1000001216.mm.1 | Kitl              | 67.41    | 55.28    | 55.62    | 227.91    | 151.61    | 234.19    |
| TC0500002280.mm.1 | Nsg1              | 286.00   | 294.90   | 263.64   | 438.29    | 459.08    | 530.46    |
| TC1800001307.mm.1 | Cdo1              | 94.98    | 116.68   | 132.17   | 284.20    | 242.33    | 263.24    |
| TC0100003531.mm.1 | Pcp4l1            | 71.63    | 92.84    | 102.84   | 225.60    | 204.89    | 205.68    |
| TC1400001906.mm.1 | Ddhd1;<br>Mir5131 | 166.36   | 171.25   | 167.65   | 221.74    | 202.28    | 220.62    |
| TC1600001287.mm.1 | Pi4ka             | 955.74   | 966.13   | 854.56   | 1450.56   | 1328.01   | 1523.23   |
| TC0900000748.mm.1 | Hexa              | 67568.25 | 60810.41 | 60343.95 | 87673.84  | 85682.05  | 93274.27  |
| TC1100002046.mm.1 | Hmga1-rs1         | 726.13   | 666.15   | 702.79   | 1737.43   | 1277.89   | 1714.11   |
| TC0100003320.mm.1 | Tor3a             | 260.13   | 245.19   | 220.61   | 421.02    | 370.97    | 431.00    |
| TC0600003114.mm.1 | Ptpn6             | 736.34   | 733.28   | 655.83   | 1030.14   | 955.88    | 1021.90   |
| TC0100002965.mm.1 | Steap3            | 79.57    | 77.34    | 71.33    | 125.36    | 113.58    | 108.42    |
| TC0200002298.mm.1 | Id1               | 74.33    | 64.57    | 67.06    | 94.43     | 95.41     | 97.10     |
| TC0200000714.mm.1 | Olfml2a           | 16.55    | 16.45    | 18.00    | 28.23     | 33.91     | 27.50     |
| TC1300000336.mm.1 | Dusp22            | 114.78   | 107.99   | 102.54   | 146.73    | 161.44    | 149.24    |
| TC1300002606.mm.1 | Rgs7bp            | 31.86    | 31.33    | 30.19    | 65.38     | 50.15     | 61.43     |
| TC1400000340.mm.1 | Ncoa4             | 283.15   | 282.22   | 242.48   | 446.31    | 402.97    | 426.13    |
| TC0600000277.mm.1 | Mest              | 17.96    | 17.86    | 19.13    | 25.72     | 23.42     | 26.08     |
| TC0400001382.mm.1 | Ppt1              | 2414.32  | 2430.32  | 2160.72  | 3316.70   | 3141.31   | 3376.16   |
| TC0600002225.mm.1 | Rarres2           | 35.56    | 35.66    | 31.73    | 54.31     | 58.57     | 66.78     |
| TC0800000846.mm.1 | Mcm5              | 436.17   | 423.26   | 339.71   | 764.19    | 722.67    | 799.58    |
| TC1100000531.mm.1 | Rnf130            | 539.95   | 568.46   | 527.75   | 777.83    | 716.46    | 818.47    |
| TC1100003799.mm.1 | Coa3              | 1051.14  | 1031.79  | 972.70   | 1524.60   | 1426.96   | 1684.79   |
| TC1400001671.mm.1 | Stab1             | 6877.69  | 6705.66  | 5938.10  | 10925.66  | 9898.19   | 11662.05  |
| TC0400001039.mm.1 | Lepr              | 17.96    | 18.71    | 19.48    | 24.55     | 22.92     | 24.35     |
| TC0200005112.mm.1 | Slpi; Mir7678     | 44.43    | 44.89    | 51.86    | 104.60    | 93.84     | 81.28     |
| TC1700000842.mm.1 | Enpp5             | 32.19    | 33.04    | 35.28    | 81.20     | 66.85     | 98.49     |
| TC1900001769.mm.1 | Tmem179b          | 3578.14  | 3366.35  | 3231.05  | 4814.41   | 4437.55   | 4917.62   |
| TC0600001424.mm.1 | C1rb              | 80.65    | 86.07    | 65.41    | 174.82    | 147.02    | 165.62    |
| TC0500003236.mm.1 | Vps33a            | 407.27   | 375.93   | 333.61   | 605.08    | 602.72    | 673.33    |
| TC0800000955.mm.1 | Cacna1a           | 227.34   | 225.94   | 209.04   | 367.86    | 319.12    | 384.97    |

|                                      |                              |           |           |           |           |           |           |
|--------------------------------------|------------------------------|-----------|-----------|-----------|-----------|-----------|-----------|
| TC0200004776.mm.1                    | Ralgapa2                     | 68.91     | 71.84     | 64.96     | 93.54     | 97.06     | 106.29    |
| TC1100001785.mm.1                    | Milr1                        | 2283.84   | 2430.85   | 2077.77   | 3391.79   | 3307.51   | 3674.88   |
| TC1500000787.mm.1                    | Parvg                        | 220.69    | 204.38    | 190.81    | 318.22    | 299.19    | 344.19    |
| TC1100004000.mm.1                    | Abca9                        | 61.35     | 64.20     | 60.08     | 113.44    | 92.69     | 114.16    |
| TC1100003466.mm.1                    | Gdpd1                        | 844.32    | 717.95    | 680.05    | 1458.18   | 1294.75   | 1576.81   |
| TC1500000797.mm.1                    | Nup50                        | 1893.06   | 1850.01   | 1898.01   | 2360.01   | 2531.04   | 2691.06   |
| TC0700001815.mm.1                    | Gdpd3                        | 35.52     | 38.36     | 30.70     | 66.12     | 58.71     | 69.25     |
| TC0200005097.mm.1                    | Ada                          | 398.29    | 397.28    | 344.17    | 579.41    | 543.38    | 585.39    |
| TC0200003147.mm.1                    | Uap1l1                       | 223.85    | 207.95    | 188.04    | 388.07    | 349.42    | 441.76    |
| TC1000003019.mm.1                    | lrak3                        | 244.33    | 228.51    | 224.28    | 311.25    | 305.72    | 288.62    |
| TC1600000662.mm.1                    | Cd200r1                      | 150.83    | 141.32    | 133.10    | 250.08    | 224.01    | 282.02    |
| TC0700000527.mm.1                    | Ppp1r14a                     | 70.36     | 71.69     | 70.73     | 138.09    | 113.96    | 151.31    |
| TC0400001091.mm.1                    | Plpp3                        | 222.70    | 189.16    | 163.10    | 393.39    | 370.25    | 416.28    |
| TC0600001369.mm.1                    | Usp18                        | 3985.69   | 3772.92   | 3217.55   | 5818.47   | 6074.19   | 6096.24   |
| TC1700000148.mm.1                    | Sod2                         | 101.33    | 100.12    | 89.12     | 133.96    | 139.73    | 147.20    |
| TC1000002467.mm.1                    | Plpp2                        | 1925.38   | 1852.72   | 1627.04   | 2689.28   | 3043.35   | 2934.25   |
| TC0500003064.mm.1                    | Gltp                         | 2937.46   | 2977.92   | 2825.38   | 5194.23   | 4286.28   | 5294.47   |
| TC1300001954.mm.1                    | 1110007C09R<br>ik            | 377.71    | 349.07    | 324.89    | 620.55    | 530.83    | 631.10    |
| TC1100000989.mm.1                    | Xaf1                         | 2026.86   | 1984.48   | 1940.05   | 2609.33   | 2414.84   | 2689.27   |
| TC0600001397.mm.1                    | Clec4a1                      | 455.57    | 476.96    | 399.26    | 1390.66   | 952.37    | 1375.57   |
| TC0200002270.mm.1                    | Angpt4                       | 95.78     | 84.69     | 86.01     | 118.59    | 126.65    | 122.42    |
| TC1300001580.mm.1                    | Vmn1r189                     | 12.39     | 12.37     | 14.01     | 18.72     | 19.94     | 18.02     |
| TC0500003376.mm.1                    | Lat2                         | 995.82    | 937.57    | 971.51    | 1436.82   | 1509.96   | 1763.53   |
| TC0200005314.mm.1                    | Ctsz                         | 96208.13  | 84942.61  | 84079.62  | 132156.00 | 141036.10 | 155873.20 |
| TC1200001861.mm.1                    | Pole2                        | 132.68    | 143.21    | 133.25    | 188.37    | 172.71    | 191.34    |
| TC1800000301.mm.1                    | Egr1                         | 108.30    | 97.61     | 95.60     | 140.87    | 133.74    | 135.57    |
| TC0100003264.mm.1                    | Rgl1                         | 97.09     | 94.13     | 89.53     | 130.88    | 117.96    | 124.13    |
| TC1_GL456210_random00000004<br>.mm.1 |                              | 3507.40   | 3065.45   | 3186.69   | 5462.76   | 4689.74   | 5348.28   |
| TC1100003106.mm.1                    | Slc25a11                     | 2081.22   | 1937.47   | 1883.08   | 2626.43   | 2490.72   | 2697.99   |
| TC1500000967.mm.1                    | Tmem106c                     | 225.33    | 229.61    | 186.10    | 401.80    | 357.77    | 420.79    |
| TC0100000892.mm.1                    | Scly                         | 76.50     | 83.77     | 72.29     | 144.83    | 119.74    | 144.12    |
| TC0500000785.mm.1                    | Stap1                        | 297.37    | 307.36    | 259.79    | 448.77    | 436.64    | 492.96    |
| TC0600001422.mm.1                    | C1ra                         | 82.60     | 85.29     | 67.72     | 152.54    | 135.78    | 160.75    |
| TC0200005015.mm.1                    | Rbl1                         | 358.49    | 371.77    | 318.26    | 499.10    | 517.88    | 550.03    |
| TC0200004623.mm.1                    | Cpxm1                        | 69.77     | 73.87     | 73.92     | 108.17    | 95.45     | 110.65    |
| TC1800000488.mm.1                    | Lvrn                         | 16.79     | 16.34     | 18.90     | 26.19     | 24.14     | 25.00     |
| TC0700003028.mm.1                    | Emp3                         | 144804.70 | 136931.30 | 126278.80 | 189893.60 | 180204.60 | 187031.80 |
| TC1700001740.mm.1                    | AI413582                     | 128.58    | 129.24    | 114.56    | 210.90    | 193.15    | 179.18    |
| TC0600000852.mm.1                    | Capg                         | 1484.10   | 1373.73   | 1305.10   | 2014.51   | 1840.12   | 1954.39   |
| TC0600003370.mm.1                    | Slco1a5                      | 30.93     | 29.82     | 31.05     | 41.03     | 39.58     | 45.45     |
| TC0100003439.mm.1                    | Sft2d2                       | 603.49    | 593.05    | 498.27    | 1006.41   | 903.01    | 1060.90   |
| TC0500000541.mm.1                    | Rbpj                         | 2245.76   | 2316.08   | 2179.25   | 3058.02   | 3041.15   | 3489.95   |
| TC0X00002269.mm.1                    | Arhgef6                      | 314.37    | 315.31    | 289.52    | 444.76    | 396.14    | 435.46    |
| TC0X00000656.mm.1                    | Vma21                        | 70.22     | 67.43     | 70.26     | 92.10     | 83.44     | 91.31     |
| TC0200002678.mm.1                    | Rbm38                        | 38.05     | 36.74     | 39.00     | 53.53     | 50.11     | 47.43     |
| TC0900001979.mm.1                    | Aplp2                        | 2496.94   | 2617.48   | 2436.73   | 3655.68   | 3698.08   | 4355.46   |
| TC1100003326.mm.1                    | Evi2a; Evi2b;<br>Gm21975     | 1989.73   | 2025.67   | 1878.46   | 3250.53   | 2852.40   | 3557.65   |
| TC0700001391.mm.1                    | Arrb1                        | 448.76    | 449.24    | 383.30    | 669.41    | 622.19    | 688.93    |
| TC0100003804.mm.1                    | Atf3                         | 428.75    | 355.14    | 350.59    | 745.49    | 623.88    | 685.81    |
| TC0600001634.mm.1                    | Ptpro                        | 41.91     | 37.58     | 37.63     | 50.96     | 50.16     | 51.80     |
| TC0100000632.mm.1                    | Slc11a1                      | 1659.88   | 1702.01   | 1447.30   | 2718.16   | 2567.92   | 3136.08   |
| TC0700002414.mm.1                    | Sepw1                        | 1901.28   | 1843.52   | 1676.54   | 2814.35   | 2508.74   | 2895.55   |
| TC1800000200.mm.1                    | Mocos                        | 150.88    | 137.24    | 142.90    | 252.49    | 205.77    | 233.28    |
| TC0100001844.mm.1                    | Tmem206                      | 369.92    | 377.98    | 386.25    | 514.93    | 471.00    | 538.28    |
| TC0900003241.mm.1                    | Myd88                        | 476.28    | 476.66    | 421.26    | 681.05    | 619.04    | 654.71    |
| TC1400000575.mm.1                    | Pnp2                         | 1585.53   | 1506.27   | 1462.46   | 2037.63   | 2211.92   | 2400.08   |
| TC0200003209.mm.1                    | Slc2a6                       | 191.59    | 175.02    | 149.66    | 382.00    | 304.24    | 358.73    |
| TC0500001844.mm.1                    | Alox5ap                      | 91156.09  | 76534.85  | 82545.45  | 118040.80 | 123959.90 | 126775.40 |
| TC0100001526.mm.1                    | Creg1                        | 1689.56   | 1701.31   | 1577.87   | 2851.67   | 2409.48   | 3010.94   |
| TC0100003341.mm.1                    | Pappa2;<br>1600012P17Ri<br>k | 58.92     | 60.20     | 54.64     | 86.40     | 77.41     | 89.68     |
| TC0500002756.mm.1                    | Cxcl10                       | 30.04     | 27.68     | 26.86     | 53.52     | 43.71     | 44.63     |
| TC1900000504.mm.1                    | lfit1                        | 821.11    | 742.19    | 577.67    | 1700.25   | 1663.24   | 2166.65   |
| TC0100002967.mm.1                    | Marco                        | 31.44     | 32.28     | 33.53     | 42.16     | 48.60     | 48.47     |
| TC0700000234.mm.1                    | Ap2s1                        | 1440.49   | 1403.33   | 1350.39   | 2254.55   | 1966.45   | 2430.98   |
| TC0800001319.mm.1                    | Vac14                        | 959.70    | 915.68    | 781.91    | 1557.84   | 1450.21   | 1749.29   |
| TC0X00000871.mm.1                    | Gm14781                      | 7.63      | 6.84      | 7.72      | 10.49     | 9.71      | 10.33     |
| TC0800000538.mm.1                    | Acsl1                        | 228.87    | 216.11    | 210.64    | 284.94    | 276.36    | 307.06    |
| TC0200004227.mm.1                    | Cat                          | 2975.26   | 3003.89   | 2526.84   | 4358.34   | 4129.66   | 4334.09   |
| TC0900000410.mm.1                    | Olfr913                      | 10.74     | 9.69      | 9.78      | 13.58     | 12.70     | 13.14     |



|                         |                      |          |          |          |          |          |          |
|-------------------------|----------------------|----------|----------|----------|----------|----------|----------|
| TC0600001404.mm.1       | Clec4d               | 2080.13  | 2051.52  | 1964.97  | 3440.16  | 2850.77  | 3475.23  |
| TC1400000306.mm.1       | Tkt; Mir3076         | 182.72   | 174.93   | 159.94   | 229.13   | 229.85   | 243.05   |
| TC1500001585.mm.1       | Mtss1                | 204.95   | 189.90   | 186.95   | 297.51   | 256.75   | 284.96   |
| TC0600003428.mm.1       | Bhlhe41              | 728.40   | 614.06   | 700.80   | 1143.01  | 1032.33  | 1236.12  |
| TC1300001285.mm.1       | Esm1                 | 13.55    | 13.14    | 15.13    | 25.78    | 34.84    | 26.66    |
| TC0900000184.mm.1       | Icam1                | 211.97   | 197.93   | 184.85   | 283.16   | 266.79   | 298.60   |
| TC0900002369.mm.1       | Scamp5               | 1237.17  | 1080.05  | 1071.66  | 1551.45  | 1594.13  | 1554.37  |
| TC0800000947.mm.1       | Podnl1               | 249.63   | 228.97   | 211.62   | 328.28   | 315.14   | 325.74   |
| TC1700002135.mm.1       | Enpp4                | 48.93    | 46.21    | 45.65    | 64.90    | 59.94    | 69.01    |
| TC0700002636.mm.1       | Ceacam2              | 61.76    | 57.12    | 58.39    | 87.41    | 111.87   | 99.80    |
| TC0500003271.mm.1       | Scarb1               | 161.82   | 149.31   | 142.84   | 264.63   | 220.66   | 268.85   |
| TC1600000346.mm.1       | Rtp4                 | 576.62   | 631.32   | 518.08   | 864.20   | 913.75   | 984.16   |
| TC0400001736.mm.1       | Pla2g2e              | 59.06    | 58.51    | 55.80    | 108.11   | 84.73    | 103.73   |
| TC1600001019.mm.1       | Slc5a3; Mrps6        | 123.88   | 131.90   | 124.48   | 180.26   | 164.96   | 193.68   |
| TC0600002543.mm.1       | Mrpl19               | 491.05   | 481.93   | 412.34   | 684.49   | 693.98   | 756.73   |
| TC0X00002504.mm.1       | Prkx                 | 1914.51  | 1968.57  | 1710.09  | 2813.12  | 2533.28  | 2812.18  |
| TC0100001550.mm.1       | Aldh9a1              | 378.11   | 398.15   | 337.12   | 725.56   | 604.00   | 793.58   |
| TC0900002156.mm.1       | C2cd2l               | 155.02   | 147.13   | 135.73   | 224.52   | 196.68   | 213.34   |
| TC0700001756.mm.1       | Prkcb                | 218.33   | 223.18   | 199.45   | 348.47   | 312.73   | 389.99   |
| TC0400003702.mm.1       | Trnp1                | 15.35    | 13.52    | 14.62    | 20.24    | 22.22    | 19.64    |
| TC1000001596.mm.1       | Stat2                | 1097.89  | 1046.64  | 918.17   | 1796.43  | 1623.98  | 2042.49  |
| TC0500003476.mm.1       | Gm454;<br>AC159257.3 | 166.04   | 174.95   | 187.81   | 593.85   | 364.47   | 484.62   |
| TC0200000850.mm.1       | Galnt13              | 26.74    | 28.18    | 26.55    | 36.54    | 36.90    | 33.09    |
| TC0100000112.mm.1       | Pi15                 | 20.78    | 22.94    | 21.11    | 30.05    | 27.67    | 27.72    |
| TC1100001047.mm.1       | Ciuh                 | 333.31   | 287.88   | 285.46   | 475.84   | 424.93   | 454.40   |
| TC0700004522.mm.1       | Rnh1                 | 1199.05  | 1061.46  | 1043.56  | 1623.68  | 1651.11  | 1904.10  |
| TC1100003396.mm.1       | Ccl5                 | 442.29   | 390.45   | 392.75   | 647.56   | 563.69   | 591.33   |
| TC1700001021.mm.1       | Alkbh7               | 168.61   | 151.42   | 151.50   | 210.43   | 207.38   | 198.25   |
| TC0600002978.mm.1       | Rassf4               | 1029.23  | 1045.75  | 904.27   | 1581.45  | 1648.47  | 1981.74  |
| TC0700000028.mm.1       | Lilra5               | 60.35    | 53.65    | 50.05    | 90.93    | 79.47    | 86.31    |
| TC0300000491.mm.1       | P2ry1                | 13.86    | 18.09    | 14.95    | 27.36    | 26.17    | 26.27    |
| TC0500002458.mm.1       | Arap2                | 66.73    | 69.41    | 63.92    | 106.44   | 95.76    | 120.77   |
| TC0100003069.mm.1       | Cdk18                | 964.40   | 1002.86  | 859.86   | 1514.26  | 1322.17  | 1514.31  |
| TC0600003375.mm.1       | Ldhb                 | 57.97    | 51.96    | 58.11    | 85.09    | 75.81    | 76.74    |
| TC0700004620.mm.1       | Sbsn                 | 59.50    | 56.52    | 51.74    | 85.51    | 78.06    | 76.29    |
| TC0100001382.mm.1       | Rnasel               | 205.51   | 187.77   | 198.22   | 326.08   | 278.48   | 347.55   |
| TC1700001689.mm.1       | Nme4                 | 64.72    | 61.35    | 56.97    | 99.43    | 84.84    | 88.73    |
| TC0700002422.mm.1       | C5ar1                | 447.31   | 382.31   | 398.98   | 552.72   | 561.31   | 564.48   |
| TC0900000442.mm.1       | Olfir974             | 8.99     | 9.48     | 8.95     | 11.51    | 11.74    | 13.00    |
| TC1200001324.mm.1       | Cdca7l               | 104.06   | 111.45   | 101.85   | 130.86   | 135.86   | 144.09   |
| TC1100003872.mm.1       | Plekhm1              | 1084.21  | 1148.90  | 960.70   | 1662.61  | 1499.60  | 1595.81  |
| TC0600001042.mm.1       | Tpra1                | 376.18   | 357.87   | 315.93   | 554.31   | 496.17   | 561.90   |
| TC1000002493.mm.1       | Gamt                 | 27.64    | 25.27    | 27.61    | 46.44    | 38.60    | 39.41    |
| TC0700000410.mm.1       | Cic                  | 451.38   | 442.78   | 427.05   | 662.71   | 563.33   | 610.30   |
| TC1700000533.mm.1       | Slc37a1              | 34.80    | 33.18    | 34.21    | 47.96    | 42.05    | 44.06    |
| TC1600000368.mm.1       | Trp63                | 12.39    | 13.04    | 13.17    | 15.89    | 17.67    | 18.08    |
| TC1000003164.mm.1       | Ormdl2               | 88.39    | 81.17    | 86.21    | 160.09   | 124.61   | 153.31   |
| TC0100002838.mm.1       | Dtymk                | 179.42   | 169.56   | 154.45   | 227.75   | 241.09   | 257.25   |
| TC0200000383.mm.1       | Psd4                 | 132.18   | 135.26   | 126.84   | 198.56   | 178.05   | 219.01   |
| TC1300000082.mm.1       | Prl2c5               | 14.11    | 14.17    | 13.01    | 19.32    | 19.76    | 23.07    |
| TC0900000793.mm.1       | Cln6                 | 2060.74  | 1921.22  | 1895.99  | 3016.22  | 2559.29  | 2797.96  |
| TC0100001859.mm.1       | Slc30a1              | 160.34   | 154.86   | 168.25   | 202.04   | 212.52   | 229.26   |
| TC1100004102.mm.1       | Wbp2                 | 260.05   | 257.69   | 258.93   | 368.38   | 339.48   | 318.12   |
| TC0300001137.mm.1       | Sort1                | 101.35   | 105.28   | 97.11    | 139.01   | 123.97   | 133.17   |
| TC0300000537.mm.1       | Ptx3                 | 17.76    | 21.15    | 23.31    | 70.29    | 47.42    | 79.45    |
| TC0400004023.mm.1       | Angptl7              | 57.38    | 60.32    | 64.55    | 109.33   | 89.56    | 114.52   |
| TC0200001245.mm.1       | Olfir1009            | 9.17     | 8.94     | 9.57     | 12.29    | 12.83    | 11.30    |
| TC1200000865.mm.1       | Cipc                 | 133.17   | 132.27   | 129.45   | 189.52   | 175.19   | 213.65   |
| TC0400003627.mm.1       | Tinagl1              | 36.08    | 37.03    | 31.99    | 56.59    | 48.61    | 55.35    |
| TC1700000836.mm.1       | Cyp39a1              | 30.01    | 27.13    | 28.03    | 37.01    | 36.61    | 40.80    |
| TC1700000992.mm.1       | Ebi3                 | 53.81    | 46.60    | 46.93    | 80.98    | 69.07    | 79.08    |
| TC0100002033.mm.1       | Mcm3                 | 147.56   | 131.96   | 129.62   | 193.97   | 192.29   | 221.45   |
| TC1300001263.mm.1       | Ankrd55              | 19.25    | 18.92    | 20.12    | 27.61    | 24.09    | 25.61    |
| TC0700001810.mm.1       | Sgf29                | 99.56    | 105.65   | 91.96    | 144.41   | 129.75   | 142.49   |
| TC0200001222.mm.1       | Ube2l6               | 420.22   | 453.46   | 402.45   | 618.92   | 601.08   | 715.72   |
| TC1300000560.mm.1       | Ninj1                | 114.34   | 99.89    | 103.49   | 214.55   | 168.20   | 226.22   |
| TC0200004896.mm.1       | Trib3                | 18.76    | 18.51    | 19.34    | 22.72    | 25.81    | 24.86    |
| TC1500000183.mm.1       | Ctnnd2               | 33.85    | 36.18    | 36.52    | 50.54    | 44.34    | 47.35    |
| TC0100003888.mm.1       | Ifi204               | 11605.78 | 12656.01 | 11029.32 | 17316.00 | 16247.02 | 19126.30 |
| TC0400004012.mm.1       | Agtrap               | 109.60   | 107.86   | 101.98   | 142.26   | 128.46   | 141.40   |
| TSUnmapped00000008.mm.1 | 42430                | 10.36    | 9.15     | 11.31    | 18.46    | 25.90    | 20.98    |
| TC1000002175.mm.1       | Man1a                | 1106.87  | 1167.05  | 965.44   | 1815.09  | 1606.33  | 1933.66  |
| TC1100004051.mm.1       | Cd300lb              | 402.27   | 386.73   | 318.39   | 682.47   | 628.14   | 797.79   |

|                   |                       |          |          |          |          |          |          |
|-------------------|-----------------------|----------|----------|----------|----------|----------|----------|
| TC070000285.mm.1  | Dmpk                  | 67.38    | 66.12    | 63.97    | 97.97    | 83.13    | 90.89    |
| TC0100003483.mm.1 | Mgst3                 | 29.87    | 29.76    | 31.86    | 54.76    | 48.94    | 67.56    |
| TC1100003570.mm.1 | Xylt2                 | 466.59   | 475.78   | 414.61   | 701.98   | 617.64   | 719.36   |
| TC0100003319.mm.1 | Soat1                 | 8972.23  | 8991.07  | 8277.63  | 12217.25 | 10891.08 | 12167.45 |
| TC0200001985.mm.1 | Ptpa                  | 7344.21  | 7168.86  | 6890.39  | 9476.82  | 8813.59  | 10136.41 |
| TC1100003156.mm.1 | Gsg2                  | 35.20    | 35.73    | 29.30    | 50.74    | 49.91    | 49.46    |
| TC0400001555.mm.1 | Sdc3                  | 550.65   | 518.31   | 503.56   | 780.64   | 670.53   | 754.84   |
| TC0700002788.mm.1 | Fxyd1                 | 51.39    | 69.14    | 68.75    | 225.07   | 152.91   | 153.21   |
| TC0100000829.mm.1 | Dgkd                  | 343.03   | 332.65   | 306.21   | 448.88   | 414.85   | 464.97   |
| TC0900002982.mm.1 | Ackr4                 | 18.74    | 16.39    | 20.39    | 27.40    | 27.46    | 28.58    |
| TC0200004811.mm.1 | Cd93                  | 5674.75  | 5702.56  | 5317.18  | 10021.71 | 7938.88  | 10017.41 |
| TC0800003024.mm.1 | Hsd11                 | 222.94   | 195.78   | 180.34   | 339.30   | 295.04   | 318.04   |
| TC0200005145.mm.1 | Slc35c2               | 365.45   | 332.14   | 337.16   | 450.40   | 417.45   | 439.99   |
| TC0200002668.mm.1 | Cass4                 | 26.78    | 31.82    | 27.98    | 39.65    | 41.39    | 39.88    |
| TC0800002398.mm.1 | Ssbp4                 | 222.58   | 198.54   | 193.70   | 300.24   | 276.08   | 318.97   |
| TC1100000951.mm.1 | Med11                 | 945.17   | 1001.30  | 952.34   | 1241.31  | 1406.36  | 1485.41  |
| TC1100004283.mm.1 | Syngn2                | 8338.08  | 7974.80  | 7116.95  | 11276.61 | 10487.31 | 11720.24 |
| TC0500001257.mm.1 | Triap1                | 101.79   | 98.46    | 89.74    | 149.85   | 128.28   | 144.16   |
| TC1100004228.mm.1 | Dcxr                  | 184.07   | 167.03   | 161.42   | 244.85   | 246.53   | 289.18   |
| TC0400000460.mm.1 | Cita                  | 1856.44  | 1650.07  | 1774.48  | 2407.79  | 2204.00  | 2285.64  |
| TC0900003266.mm.1 | Cck                   | 27.14    | 29.48    | 25.56    | 37.53    | 37.60    | 42.30    |
| TC1700000461.mm.1 | Hmga1;<br>Hmga1-rs1   | 761.26   | 800.58   | 710.61   | 1303.20  | 1054.83  | 1259.35  |
| TC0600002109.mm.1 | Hipk2                 | 854.62   | 882.06   | 812.28   | 1132.96  | 1053.80  | 1205.84  |
| TC1100000955.mm.1 | Psmb6                 | 923.49   | 903.13   | 846.16   | 1219.65  | 1147.36  | 1340.70  |
| TC1500000296.mm.1 | Atp6v1c1              | 3793.50  | 4316.94  | 3780.02  | 5396.90  | 5694.72  | 6228.49  |
| TC0400001160.mm.1 | Rab3b                 | 19.69    | 19.13    | 19.80    | 26.73    | 33.07    | 33.47    |
| TC0900001182.mm.1 | Slc9a9                | 1267.94  | 1250.05  | 1116.57  | 1820.93  | 1628.50  | 1916.21  |
| TC0600002194.mm.1 | Rbpsuh-rs3            | 26038.57 | 26580.17 | 24023.75 | 34266.61 | 33135.38 | 37979.36 |
| TC0200004548.mm.1 | Itpr1                 | 248.63   | 263.81   | 229.29   | 364.69   | 331.43   | 388.42   |
| TC1100001256.mm.1 | Ccl4                  | 59.48    | 59.46    | 61.95    | 121.83   | 93.59    | 131.49   |
| TC1100003054.mm.1 | Mpdu1                 | 294.03   | 279.83   | 271.56   | 375.60   | 338.19   | 370.60   |
| TC1000000300.mm.1 | Col10a1               | 62.01    | 48.50    | 53.75    | 136.54   | 98.16    | 110.70   |
| TC1600001500.mm.1 | Nrros                 | 183.52   | 172.62   | 156.87   | 251.14   | 225.99   | 244.13   |
| TC1400001931.mm.1 | Wdhd1                 | 124.48   | 126.63   | 121.68   | 186.63   | 162.58   | 200.41   |
| TC1900000500.mm.1 | Ifit2                 | 79.51    | 85.19    | 65.65    | 151.05   | 127.62   | 162.41   |
| TC0700004659.mm.1 | Rnf141                | 640.83   | 602.01   | 560.40   | 805.59   | 767.87   | 847.48   |
| TC1400002632.mm.1 | Kctd12;<br>Mir5130    | 477.38   | 453.71   | 409.07   | 803.42   | 651.97   | 818.15   |
| TC0100003664.mm.1 | Psen2                 | 72.40    | 64.03    | 71.18    | 111.59   | 93.55    | 109.35   |
| TC1400002746.mm.1 | Gpr183                | 1235.67  | 997.09   | 941.45   | 1860.14  | 1714.63  | 1974.80  |
| TC1600001919.mm.1 | Samsn1                | 59.22    | 55.43    | 52.41    | 73.41    | 68.56    | 72.61    |
| TC1500000045.mm.1 | Lifr                  | 97.08    | 100.13   | 93.03    | 161.48   | 129.60   | 150.57   |
| TC0X00003437.mm.1 | Il2rg                 | 564.56   | 602.60   | 533.47   | 718.51   | 753.61   | 803.57   |
| TC0300002506.mm.1 | Fcgr1                 | 1444.76  | 1491.93  | 1440.42  | 2006.31  | 1811.73  | 2145.35  |
| TC0600001514.mm.1 | Gm5884                | 4183.08  | 4174.59  | 4018.84  | 6174.08  | 6592.88  | 8160.25  |
| TC0100003891.mm.1 | Ifi203                | 666.67   | 717.23   | 642.20   | 1319.71  | 992.96   | 1203.64  |
| TC0200002170.mm.1 | Naa20                 | 377.31   | 361.38   | 378.94   | 517.24   | 498.27   | 449.76   |
| TC1000002586.mm.1 | App2                  | 136.31   | 132.20   | 127.71   | 193.61   | 164.72   | 180.27   |
| TC1800001437.mm.1 | Adrb2                 | 74.80    | 61.39    | 74.64    | 133.68   | 109.51   | 116.19   |
| TC0800000786.mm.1 | Babam1                | 11067.78 | 10860.47 | 9256.64  | 14323.94 | 15239.72 | 15320.36 |
| TC0X00002423.mm.1 | Xlr4c                 | 34.09    | 34.95    | 35.18    | 45.19    | 43.08    | 50.32    |
| TC0500002343.mm.1 | Qdpr                  | 163.46   | 158.79   | 147.17   | 247.28   | 210.83   | 214.56   |
| TC0700003894.mm.1 | Olfr611               | 8.30     | 9.53     | 9.20     | 12.00    | 11.51    | 12.48    |
| TC0500002805.mm.1 | Antxr2                | 1145.48  | 1126.86  | 971.36   | 1453.31  | 1525.74  | 1536.08  |
| TC0500001560.mm.1 | Rfc2                  | 174.91   | 164.68   | 145.34   | 223.23   | 223.81   | 224.80   |
| TC0800000648.mm.1 | 2700029M09<br>Rik     | 255.09   | 256.56   | 256.46   | 334.06   | 339.08   | 299.68   |
| TC1100004053.mm.1 | Cd300ld               | 217.44   | 220.61   | 211.16   | 260.58   | 287.57   | 300.78   |
| TC1400000784.mm.1 | Psme1                 | 263.52   | 245.91   | 223.43   | 321.56   | 327.55   | 336.03   |
| TC0500001649.mm.1 | Lamtor4               | 1373.85  | 1296.10  | 1351.70  | 1706.97  | 1827.63  | 2032.86  |
| TC0500003472.mm.1 | Mcm7; Mir93;<br>Mir25 | 250.00   | 237.33   | 211.04   | 311.95   | 320.71   | 337.09   |
| TC1100004115.mm.1 | Foxj1; Rnf157         | 56.88    | 56.45    | 56.81    | 78.90    | 69.36    | 81.72    |
| TC0800000959.mm.1 | Lyl1                  | 318.23   | 262.96   | 230.08   | 695.19   | 500.60   | 638.09   |
| TC0200004502.mm.1 | Spg11                 | 172.58   | 174.33   | 155.05   | 241.04   | 219.09   | 256.86   |
| TC0800003224.mm.1 | Zdhhc2                | 535.33   | 486.94   | 473.16   | 675.38   | 620.54   | 663.46   |
| TC0600001193.mm.1 | Itpr1                 | 60.82    | 63.17    | 60.62    | 79.18    | 72.27    | 81.62    |
| TC0900001441.mm.1 | Nme6                  | 157.49   | 152.19   | 141.96   | 249.65   | 216.61   | 284.47   |
| TC0300000092.mm.1 | Car13                 | 775.16   | 736.91   | 532.14   | 1419.54  | 1377.77  | 1684.61  |
| TC1700002771.mm.1 | Nme3                  | 147.80   | 144.00   | 118.89   | 228.95   | 205.33   | 242.84   |
| TC0300000555.mm.1 | Mfsd1                 | 8240.51  | 8481.72  | 7340.64  | 11459.44 | 11079.55 | 12994.90 |
| TC1300000597.mm.1 | S1pr3                 | 34.53    | 31.65    | 28.69    | 43.93    | 43.21    | 46.67    |
| TC1100002224.mm.1 | Fignl1                | 60.41    | 58.87    | 55.59    | 80.96    | 71.02    | 77.19    |

|                                  |                           |          |          |          |          |          |          |
|----------------------------------|---------------------------|----------|----------|----------|----------|----------|----------|
| TC1400002142.mm.1                | Cryl1                     | 216.98   | 187.65   | 177.36   | 289.81   | 271.63   | 300.98   |
| TC1700001463.mm.1                | Gpr31b;<br>Gpr31c         | 81.30    | 75.28    | 78.28    | 118.52   | 105.87   | 100.06   |
| TC1100002103.mm.1                | Tcn2                      | 4647.37  | 4471.64  | 4180.51  | 6022.15  | 6205.76  | 5479.41  |
| TC0500003175.mm.1                | Oas2                      | 1007.80  | 1105.22  | 951.60   | 1563.64  | 1437.49  | 1775.68  |
| TC1000002671.mm.1                | Tmpo                      | 215.69   | 198.15   | 191.11   | 272.48   | 252.79   | 284.48   |
| TC0700000647.mm.1                | Pepd                      | 91.81    | 91.51    | 81.71    | 136.33   | 115.73   | 126.84   |
| TC0300003215.mm.1                | Hist2h2aa1;<br>Hist2h2aa2 | 1964.76  | 1831.43  | 2025.08  | 2730.56  | 2568.61  | 2399.57  |
| TC1700001902.mm.1                | Psmb9                     | 55.00    | 53.35    | 53.48    | 69.38    | 69.53    | 80.96    |
| TC1100003575.mm.1                | Gm11546                   | 28.88    | 27.29    | 28.11    | 36.99    | 37.58    | 33.23    |
| TC0600001877.mm.1                | Gpr85                     | 35.02    | 40.71    | 38.53    | 56.88    | 50.72    | 59.64    |
| TC0X00002995.mm.1                | Gla                       | 3282.71  | 3347.25  | 2835.43  | 4357.11  | 5040.75  | 4613.66  |
| TC1200001552.mm.1                | Rsad2                     | 125.16   | 109.17   | 129.66   | 242.34   | 192.13   | 193.10   |
| TC0100001173.mm.1                | Rab7b                     | 1219.27  | 1184.07  | 1050.07  | 1600.88  | 1537.76  | 1752.54  |
| TC1700002822.mm.1                | H2-T22; H2-T9             | 379.06   | 388.87   | 323.26   | 523.04   | 499.02   | 538.81   |
| TC0100001985.mm.1                | Eya1                      | 65.84    | 67.56    | 63.90    | 90.55    | 82.59    | 99.04    |
| TC0800000844.mm.1                | Tom1                      | 432.78   | 431.28   | 385.26   | 590.15   | 628.48   | 737.80   |
| TC0700000896.mm.1                | Nav2;<br>Gm2788           | 102.58   | 97.08    | 93.79    | 127.85   | 116.68   | 129.19   |
| TC1100000078.mm.1                | Dbnl                      | 163.48   | 150.72   | 149.47   | 195.01   | 188.74   | 209.99   |
| TC0500003063.mm.1                | Trpv4                     | 153.17   | 129.34   | 126.82   | 223.59   | 192.73   | 220.73   |
| TC0600000344.mm.1                | Nup205                    | 351.61   | 370.35   | 323.68   | 448.64   | 463.78   | 504.55   |
| TC1300000919.mm.1                | GlrX                      | 947.14   | 959.91   | 728.35   | 1457.72  | 1805.16  | 1694.69  |
| TC0800002992.mm.1                | Maf                       | 4893.29  | 4798.33  | 4315.94  | 7166.83  | 6147.33  | 7275.61  |
| TC1_GL456210_random00000011.mm.1 |                           | 2325.82  | 1916.61  | 2176.71  | 2949.90  | 3028.28  | 2935.83  |
| TC1200002524.mm.1                | Serpina3f                 | 17.68    | 20.29    | 17.39    | 25.52    | 26.76    | 24.24    |
| TC0900001042.mm.1                | Elovl5                    | 858.70   | 792.94   | 771.43   | 1079.13  | 993.99   | 1122.72  |
| TC1600001556.mm.1                | Parp14                    | 327.22   | 363.57   | 317.30   | 466.18   | 460.98   | 539.09   |
| TC0600002690.mm.1                | Mcm2                      | 222.06   | 208.15   | 188.79   | 311.62   | 305.65   | 377.85   |
| TC1300001265.mm.1                | Il6st                     | 4345.99  | 4316.16  | 3981.07  | 6689.10  | 5487.50  | 6478.04  |
| TC0400003379.mm.1                | Atp6v0b                   | 3978.49  | 3739.01  | 3259.84  | 5883.29  | 5232.91  | 6346.58  |
| TC0200003362.mm.1                | Stom                      | 7981.12  | 8122.07  | 6858.64  | 10801.63 | 10175.61 | 10697.74 |
| TC0200005114.mm.1                | Sdc4                      | 121.93   | 111.23   | 109.54   | 193.42   | 154.50   | 173.45   |
| TC1200001277.mm.1                | Pacs2                     | 435.71   | 421.83   | 367.79   | 567.69   | 545.31   | 601.18   |
| TC1300000262.mm.1                | Hist1h1a                  | 56.84    | 51.77    | 60.78    | 80.20    | 88.56    | 100.88   |
| TC0300002695.mm.1                | Cd53                      | 19464.83 | 19140.70 | 16560.19 | 24856.79 | 26963.47 | 28849.07 |
| TC0600002697.mm.1                | Plxna1                    | 4545.56  | 4357.42  | 4086.52  | 5845.81  | 5327.26  | 6077.78  |
| TC1100000726.mm.1                | Nlrp3                     | 318.68   | 333.21   | 283.15   | 443.38   | 414.32   | 475.35   |
| TC0800000758.mm.1                | Lrrc25                    | 104.85   | 89.96    | 101.46   | 134.49   | 135.07   | 153.07   |
| TC0200004537.mm.1                | Atp8b4                    | 204.13   | 217.07   | 185.99   | 289.23   | 264.24   | 305.24   |
| TC0600002114.mm.1                | Parp12                    | 3709.85  | 3675.00  | 3162.23  | 5380.57  | 4760.99  | 5599.76  |
| TC0800001247.mm.1                | Prmt7                     | 86.41    | 77.39    | 76.93    | 102.56   | 99.59    | 108.60   |
| TC1100003086.mm.1                | Slc16a13                  | 50.60    | 56.97    | 58.92    | 81.01    | 74.51    | 72.73    |
| TC1700000036.mm.1                | Zdhhc14                   | 214.32   | 197.28   | 174.45   | 310.39   | 278.70   | 338.82   |
| TC0500001610.mm.1                | Ift22                     | 538.31   | 469.22   | 516.99   | 635.48   | 703.80   | 692.25   |
| TC1300000638.mm.1                | Tspan17                   | 440.23   | 375.52   | 399.37   | 614.35   | 542.35   | 549.05   |
| TC1300000174.mm.1                | Hist1h3h                  | 74.87    | 71.88    | 80.10    | 93.99    | 107.93   | 99.60    |
| TC0X00000677.mm.1                | Xlr4b                     | 45.97    | 42.50    | 50.01    | 58.79    | 61.79    | 62.18    |
| TC0X00001634.mm.1                | Phka2                     | 278.52   | 289.91   | 259.02   | 345.31   | 360.06   | 394.78   |
| TC1200002224.mm.1                | Ttc7b                     | 305.55   | 277.79   | 244.46   | 417.24   | 385.59   | 433.57   |
| TC1100003115.mm.1                | Scimp                     | 219.15   | 184.64   | 204.37   | 348.27   | 318.34   | 438.11   |
| TC0200001761.mm.1                | Gchfr                     | 26.03    | 25.15    | 28.93    | 40.30    | 34.77    | 41.03    |
| TC0300002492.mm.1                | Plekho1                   | 1118.32  | 1021.39  | 968.22   | 1426.51  | 1300.95  | 1353.92  |
| TC0200005402.mm.1                | Lama5                     | 68.02    | 61.83    | 62.79    | 87.01    | 79.14    | 92.09    |
| TC0X00001665.mm.1                | Pir                       | 58.25    | 54.14    | 53.72    | 88.38    | 71.81    | 78.35    |
| TC0800003171.mm.1                | Agt                       | 27.32    | 23.26    | 24.89    | 41.95    | 35.07    | 35.85    |
| TC0500003507.mm.1                | Snx8                      | 264.26   | 263.01   | 243.52   | 451.49   | 351.63   | 453.71   |
| TC1100002069.mm.1                | Metrl                     | 246.10   | 237.16   | 206.10   | 363.63   | 312.60   | 370.99   |
| TC0500003742.mm.1                | Tmem184a                  | 12.22    | 12.95    | 12.71    | 16.18    | 19.59    | 16.97    |
| TC0300001161.mm.1                | Vav3                      | 162.28   | 159.06   | 160.94   | 230.07   | 206.58   | 259.78   |
| TC1900000127.mm.1                | Ppp1r14b                  | 731.40   | 682.65   | 703.71   | 936.76   | 846.56   | 984.72   |
| TC1500001528.mm.1                | Tnfrsf11b                 | 665.69   | 588.89   | 555.82   | 1415.89  | 972.96   | 1383.16  |
| TC0800002842.mm.1                | Psmb10                    | 203.17   | 176.55   | 165.07   | 294.47   | 252.18   | 294.20   |
| TC1900000022.mm.1                | Acy3                      | 36.42    | 32.46    | 31.45    | 43.15    | 42.08    | 42.76    |
| TC0Y00000223.mm.1                | Erdr1                     | 1979.51  | 1629.86  | 1657.47  | 3287.32  | 2568.68  | 3182.45  |
| TC1700001209.mm.1                | Galm                      | 115.17   | 105.02   | 107.46   | 185.07   | 164.80   | 232.16   |
| TC1900000693.mm.1                | Tmem180                   | 59.28    | 57.62    | 49.58    | 82.99    | 73.71    | 81.47    |
| TC1500001838.mm.1                | Rac2                      | 8075.59  | 6973.53  | 5679.82  | 12604.75 | 11430.98 | 12950.32 |
| TC1400000574.mm.1                | Pnp                       | 1673.03  | 1595.91  | 1576.12  | 2560.08  | 2233.97  | 2996.42  |
| TC0600001474.mm.1                | D6Wsu163e                 | 500.34   | 475.14   | 418.28   | 635.51   | 625.25   | 698.86   |

|                   |                           |          |          |          |          |          |           |
|-------------------|---------------------------|----------|----------|----------|----------|----------|-----------|
| TC1500000591.mm.1 | Mroh1;<br>Mir6954         | 220.17   | 212.93   | 185.15   | 326.14   | 283.38   | 350.48    |
| TC1400002454.mm.1 | Lacc1                     | 287.39   | 294.85   | 261.38   | 374.96   | 357.05   | 414.46    |
| TC0100003058.mm.1 | Srgap2                    | 551.65   | 536.42   | 491.99   | 770.43   | 709.81   | 892.53    |
| TC1600000033.mm.1 | Hmox2                     | 723.58   | 687.64   | 687.15   | 941.19   | 859.14   | 1032.90   |
| TC0100002420.mm.1 | Gm11578                   | 7.71     | 8.52     | 8.40     | 14.23    | 12.55    | 11.03     |
| TC1100003836.mm.1 | Slc25a39                  | 373.96   | 339.17   | 336.40   | 447.40   | 415.33   | 441.29    |
| TC1800000606.mm.1 | Gm4951                    | 237.37   | 288.27   | 222.91   | 429.09   | 402.30   | 526.01    |
| TC1100003333.mm.1 | Snrnp25                   | 227.06   | 227.06   | 249.62   | 312.69   | 334.37   | 288.08    |
| TC1300001449.mm.1 | Edaradd                   | 37.74    | 31.87    | 34.58    | 55.32    | 46.08    | 53.95     |
| TC0400002097.mm.1 | Cpsf3l                    | 312.81   | 299.63   | 280.47   | 412.32   | 361.60   | 409.19    |
| TC0500001239.mm.1 | Oas2                      | 938.69   | 994.34   | 829.11   | 1376.66  | 1224.35  | 1438.95   |
| TC1500001658.mm.1 | St3gal1                   | 478.05   | 466.66   | 425.54   | 628.90   | 588.25   | 705.64    |
| TC0300002501.mm.1 | Hist2h2aa1;<br>Hist2h2aa2 | 1773.62  | 1771.02  | 1885.85  | 2299.41  | 2555.86  | 2198.05   |
| TC0100000386.mm.1 | Ormdl1                    | 35.26    | 38.01    | 33.02    | 51.01    | 45.11    | 53.31     |
| TC1100001999.mm.1 | Gaa                       | 1917.90  | 1828.39  | 1609.46  | 2710.32  | 2359.83  | 2765.54   |
| TC0100003401.mm.1 | Fmo1                      | 14.22    | 14.46    | 15.00    | 17.54    | 18.99    | 20.76     |
| TC0400004062.mm.1 | Car6                      | 31.60    | 27.90    | 34.49    | 61.77    | 46.83    | 51.85     |
| TC0600001398.mm.1 | Clec4a3                   | 765.23   | 692.80   | 657.20   | 1052.10  | 925.59   | 1128.68   |
| TC0400003708.mm.1 | Zdhhc18                   | 689.31   | 698.86   | 612.35   | 917.34   | 826.06   | 918.49    |
| TC0200001894.mm.1 | Fgf7                      | 214.92   | 212.18   | 196.95   | 375.25   | 308.79   | 450.46    |
| TC0800003076.mm.1 | Aprt                      | 442.34   | 396.17   | 354.41   | 567.02   | 542.06   | 561.65    |
| TC1300001383.mm.1 | Akr1e1                    | 195.83   | 179.62   | 179.36   | 246.71   | 220.67   | 250.41    |
| TC1000002727.mm.1 | Mrpl42                    | 22897.96 | 23067.70 | 25370.03 | 33610.64 | 29037.26 | 32588.96  |
| TC1600000529.mm.1 | Hcls1                     | 3477.21  | 3201.65  | 3208.73  | 5636.28  | 4345.46  | 5253.34   |
| TC0600003048.mm.1 | Bid                       | 90.81    | 84.35    | 82.26    | 112.86   | 115.95   | 136.92    |
| TC1300001139.mm.1 | Taf9; Ak6                 | 564.51   | 495.80   | 510.37   | 687.98   | 633.07   | 678.53    |
| TC1700002534.mm.1 | Dpy30                     | 39.17    | 36.56    | 37.53    | 57.55    | 47.02    | 56.57     |
| TC1200000279.mm.1 | Nampt                     | 3730.35  | 3601.68  | 3243.61  | 5418.20  | 4853.63  | 6298.50   |
| TC0100003124.mm.1 | Rnpep                     | 653.11   | 636.85   | 616.88   | 1062.73  | 826.30   | 924.85    |
| TC0500000057.mm.1 | Tmem243                   | 50.22    | 48.91    | 53.59    | 76.90    | 64.39    | 79.60     |
| TC0100000476.mm.1 | Cd28                      | 26.35    | 24.55    | 23.28    | 35.18    | 30.60    | 35.69     |
| TC1300000191.mm.1 | Hist1h2bk                 | 144.12   | 119.95   | 145.03   | 194.22   | 203.40   | 183.66    |
| TC0100003595.mm.1 | Gm16340                   | 1347.73  | 1408.78  | 1168.12  | 2211.43  | 1786.69  | 2074.60   |
| TC1000000892.mm.1 | Pip5k1c                   | 178.00   | 171.30   | 164.13   | 234.20   | 204.16   | 236.39    |
| TC0900003318.mm.1 | Ppp2r3d;<br>Ppp2r3a       | 61.02    | 57.41    | 56.30    | 78.90    | 68.80    | 77.25     |
| TC0900000816.mm.1 | Snapc5                    | 286.18   | 268.54   | 315.05   | 362.40   | 379.87   | 394.37    |
| TC1700002571.mm.1 | Cyp1b1                    | 277.43   | 271.51   | 224.14   | 484.69   | 414.18   | 602.53    |
| TC1100000582.mm.1 | Cdkn2aipnl                | 3423.22  | 3173.29  | 2583.41  | 4947.38  | 4517.99  | 4971.18   |
| TC0100003051.mm.1 | Mapkapk2                  | 6271.30  | 6686.47  | 5836.20  | 8901.12  | 8177.16  | 10038.85  |
| TC0100001170.mm.1 | Fam72a                    | 31.87    | 28.10    | 32.33    | 56.41    | 49.04    | 42.73     |
| TC0100003736.mm.1 | Hlx                       | 103.30   | 110.80   | 98.00    | 135.78   | 154.91   | 171.34    |
| TC0600000705.mm.1 | Vmn1r28                   | 20.23    | 18.93    | 19.53    | 25.46    | 26.28    | 22.84     |
| TC0300000697.mm.1 | Etv3                      | 86.40    | 91.50    | 77.66    | 111.71   | 106.44   | 111.73    |
| TC0400004034.mm.1 | Pgd                       | 743.85   | 692.30   | 617.55   | 937.63   | 897.43   | 1013.57   |
| TC1500000389.mm.1 | Nov                       | 18.70    | 18.77    | 21.32    | 40.72    | 29.79    | 31.14     |
| TC1400001559.mm.1 | Comtd1                    | 43.03    | 44.66    | 42.61    | 60.60    | 51.48    | 60.04     |
| TC0700002750.mm.1 | Sdhaf1                    | 59.64    | 60.60    | 58.86    | 79.29    | 70.88    | 85.03     |
| TC0X00001054.mm.1 | Pbdc1                     | 94.82    | 82.09    | 83.44    | 107.80   | 111.43   | 109.08    |
| TC1500000423.mm.1 | Ndufb9                    | 6853.57  | 5759.46  | 5882.02  | 8181.32  | 8323.08  | 9202.05   |
| TC0400003847.mm.1 | Pqlc2                     | 143.85   | 142.95   | 125.76   | 187.75   | 173.32   | 201.62    |
| TC1100002045.mm.1 | Rac3                      | 125.25   | 125.07   | 112.67   | 223.49   | 166.38   | 219.72    |
| TC0200004953.mm.1 | Ahcy;<br>Gm4737           | 365.49   | 336.63   | 297.66   | 488.53   | 440.42   | 503.42    |
| TC0100000375.mm.1 | Stat1                     | 2520.11  | 2278.41  | 2176.81  | 3189.57  | 2860.68  | 3166.24   |
| TC0200005496.mm.1 | Fam78a                    | 38.53    | 36.06    | 33.86    | 50.07    | 43.98    | 47.40     |
| TC1800000890.mm.1 | Cyb5a                     | 904.05   | 842.94   | 857.45   | 1457.07  | 1132.69  | 1246.82   |
| TC1900000211.mm.1 | Slc15a3                   | 1238.68  | 1132.45  | 1051.09  | 1779.97  | 1477.30  | 1736.75   |
| TC0100001711.mm.1 | Parp1;<br>Mir6904         | 245.68   | 219.57   | 208.43   | 317.71   | 282.41   | 311.58    |
| TC1500001754.mm.1 | Tsta3                     | 346.34   | 306.34   | 283.71   | 466.32   | 411.98   | 480.42    |
| TC0100000103.mm.1 | Ly96                      | 68908.45 | 77919.91 | 68650.48 | 96735.52 | 89159.77 | 102805.00 |
| TC1100001565.mm.1 | Stard3                    | 350.50   | 340.67   | 308.11   | 500.43   | 417.92   | 473.39    |
| TC0800000756.mm.1 | Isyna1                    | 106.35   | 103.45   | 83.93    | 169.09   | 146.45   | 193.69    |
| TC0X00002417.mm.1 | Xlr4a                     | 33.62    | 37.39    | 35.11    | 50.45    | 47.23    | 60.23     |
| TC1100004264.mm.1 | Mgat4b;<br>Mir6919        | 102.83   | 87.98    | 82.46    | 144.99   | 125.84   | 153.99    |
| TC1300002247.mm.1 | Zfp459                    | 45.81    | 43.05    | 44.98    | 59.53    | 51.75    | 58.20     |
| TC0100000222.mm.1 | Imp4                      | 874.83   | 770.45   | 745.86   | 1055.50  | 995.54   | 1086.52   |
| TC0300000722.mm.1 | Gimp                      | 1495.88  | 1446.83  | 1312.25  | 1966.16  | 1727.90  | 1899.17   |
| TC1400001573.mm.1 | Dlg5                      | 103.04   | 101.52   | 94.11    | 132.71   | 117.61   | 134.20    |
| TC0200004942.mm.1 | E2f1                      | 169.45   | 179.16   | 155.74   | 224.35   | 206.90   | 237.17    |

|                                       |            |          |          |          |          |          |          |
|---------------------------------------|------------|----------|----------|----------|----------|----------|----------|
| TC1100004301.mm.1                     | Trim47     | 82.10    | 69.99    | 71.80    | 111.40   | 95.43    | 104.93   |
| TC1400000176.mm.1                     | Plau       | 7376.70  | 7515.71  | 6361.65  | 9630.87  | 9220.04  | 10528.22 |
| TC0100003890.mm.1                     | Mndal      | 311.88   | 322.48   | 316.54   | 506.24   | 399.73   | 439.92   |
| TC0200001368.mm.1                     | Spi1       | 4106.56  | 4166.80  | 3594.97  | 5534.50  | 5081.33  | 6041.86  |
| TC0600001521.mm.1                     | Clec2i     | 20.47    | 20.79    | 23.59    | 26.89    | 28.07    | 26.82    |
| TC0X00000724.mm.1                     | Xlr4d-ps   | 74.03    | 69.69    | 87.49    | 120.24   | 134.80   | 170.06   |
| TC0700002718.mm.1                     | Kcnk6      | 430.89   | 457.60   | 330.26   | 646.00   | 679.25   | 661.07   |
| TC1700000318.mm.1                     | Pkmyt1     | 37.76    | 35.56    | 33.33    | 50.09    | 43.48    | 46.02    |
| TC1100000362.mm.1                     | Lcp2       | 5250.68  | 5241.19  | 4859.99  | 7683.45  | 6286.94  | 7052.68  |
| TC0100001016.mm.1                     | Zcchc2     | 231.83   | 237.12   | 225.24   | 316.81   | 271.17   | 315.24   |
| TC0800001407.mm.1                     | Plcg2      | 432.85   | 434.63   | 395.43   | 615.30   | 518.10   | 621.20   |
| TC0500001389.mm.1                     | Vps29      | 501.81   | 487.72   | 474.40   | 640.55   | 564.10   | 650.97   |
| TC0900001423.mm.1                     | Nckipsd    | 131.93   | 119.78   | 123.47   | 188.23   | 153.96   | 177.68   |
| TC0300002297.mm.1                     | Apoa1bp    | 8042.57  | 8722.59  | 7408.63  | 10684.42 | 9940.83  | 10867.66 |
| TC0600001243.mm.1                     | Mtmr14     | 266.60   | 267.18   | 225.99   | 372.00   | 327.78   | 380.33   |
| TC1500000775.mm.1                     | Bik        | 45.00    | 48.43    | 42.74    | 59.48    | 55.92    | 65.32    |
| TC1000000744.mm.1                     | Lss        | 143.74   | 134.31   | 121.93   | 187.88   | 166.23   | 181.08   |
| TC0700002693.mm.1                     | Timm50     | 78.15    | 82.97    | 82.48    | 113.01   | 96.89    | 115.93   |
| TC1200001768.mm.1                     | Nfkbia     | 369.09   | 314.30   | 312.87   | 423.35   | 437.85   | 446.79   |
| TC0700003693.mm.1                     | Olfr305    | 13.99    | 13.91    | 16.46    | 19.16    | 19.70    | 19.19    |
| TC0400003680.mm.1                     | Smpdl3b    | 260.34   | 230.08   | 227.52   | 300.60   | 290.58   | 310.69   |
| TC1800000484.mm.1                     | Ap3s1      | 11143.38 | 10840.23 | 11077.16 | 17741.12 | 14098.73 | 18548.11 |
| TC1400000501.mm.1                     | Cdkn3      | 1069.22  | 1160.38  | 1252.77  | 1815.59  | 1487.77  | 1755.70  |
| TC0400001790.mm.1                     | Hspb7      | 44.58    | 35.99    | 40.58    | 154.61   | 77.88    | 109.83   |
| TC0800000017.mm.1                     | Stxbp2     | 1120.49  | 1074.12  | 1068.96  | 1513.78  | 1285.81  | 1524.43  |
| TC0900001348.mm.1                     | Abhd14b    | 42.56    | 38.75    | 38.87    | 57.73    | 52.43    | 67.53    |
| TC0800001493.mm.1                     | Cdt1       | 68.05    | 58.86    | 65.59    | 103.86   | 83.29    | 92.83    |
| TC1300001634.mm.1                     | Hist1h2ae  | 67.45    | 64.32    | 67.10    | 90.65    | 77.77    | 91.69    |
| TC0300000897.mm.1                     | Cers2      | 498.84   | 445.53   | 437.87   | 598.99   | 556.36   | 622.23   |
| TC0800003031.mm.1                     | Cotl1      | 2283.62  | 1821.23  | 1764.11  | 3343.90  | 2793.74  | 3260.06  |
| TC1200001237.mm.1                     | Tnfaip2    | 388.70   | 402.25   | 356.74   | 508.53   | 462.08   | 537.51   |
| TC0600003123.mm.1                     | Gpr162     | 28.77    | 24.80    | 23.99    | 45.88    | 35.76    | 47.48    |
| TC1100003379.mm.1                     | Slnf9      | 297.10   | 294.43   | 265.35   | 414.05   | 351.71   | 419.54   |
| TC0900000031.mm.1                     | Casp1      | 472.02   | 422.24   | 420.91   | 786.35   | 625.62   | 916.19   |
| TC0100002151.mm.1                     | Ccdc115    | 78.40    | 92.90    | 78.07    | 137.24   | 113.21   | 147.03   |
| TC1000000783.mm.1                     | Gm10146    | 1795.46  | 1463.08  | 1538.01  | 2235.89  | 2113.36  | 2408.21  |
| TC0X00003276.mm.1                     | Ppef1      | 13.22    | 13.50    | 14.85    | 16.93    | 19.59    | 17.76    |
| TC0400000436.mm.1                     | Tesk1      | 97.67    | 102.79   | 92.30    | 130.39   | 119.22   | 143.10   |
| TC0200003165.mm.1                     | Fcna       | 54.46    | 53.57    | 53.89    | 65.42    | 69.45    | 79.59    |
| TC0300002348.mm.1                     | Adam15     | 979.16   | 939.63   | 859.69   | 1322.15  | 1144.12  | 1372.89  |
| TC1400001524.mm.1                     | Gng2       | 1013.23  | 871.44   | 828.67   | 1275.56  | 1188.31  | 1369.53  |
| TC0300002728.mm.1                     | Gstm4      | 759.08   | 700.61   | 606.00   | 980.59   | 918.00   | 953.57   |
| TC1_GL456212_random00000008<br>.mm.1  |            | 225.78   | 223.27   | 212.65   | 306.45   | 293.53   | 258.44   |
| TC1900000993.mm.1                     | Pola2      | 249.73   | 248.30   | 212.14   | 333.11   | 301.55   | 349.97   |
| TC1600002080.mm.1                     | Tmem50b    | 4236.64  | 4514.65  | 3707.25  | 5533.34  | 5796.71  | 6528.47  |
| TC1800000534.mm.1                     | Snx2       | 14502.67 | 14094.15 | 13740.41 | 18433.34 | 17065.83 | 20791.92 |
| TC1100002176.mm.1                     | Myo1g      | 286.41   | 271.77   | 253.39   | 403.58   | 340.01   | 425.94   |
| TC1700002288.mm.1                     | Mrps36-ps1 | 1952.25  | 1519.20  | 1725.56  | 2835.32  | 2400.99  | 2975.28  |
| TC0200004970.mm.1                     | Edem2      | 296.03   | 266.37   | 254.34   | 367.77   | 338.39   | 395.44   |
| TC1000001203.mm.1                     | Poc1b      | 263.31   | 233.40   | 221.48   | 354.03   | 304.68   | 362.74   |
| TC1700001130.mm.1                     | Myom1      | 26.95    | 29.01    | 27.76    | 32.72    | 37.23    | 38.71    |
| TC1800001048.mm.1                     | B4galt6    | 4479.57  | 4517.37  | 3938.86  | 6104.86  | 5557.55  | 6897.20  |
| TC1800000063.mm.1                     | Colec12    | 3140.64  | 3073.89  | 2520.22  | 4613.26  | 4176.39  | 5433.52  |
| TC1900001137.mm.1                     | Ms4a6d     | 27641.62 | 26494.06 | 24861.79 | 38526.88 | 31943.33 | 37684.59 |
| TC1100001265.mm.1                     | Wfdc18     | 25.34    | 27.78    | 27.33    | 35.28    | 44.79    | 36.73    |
| TC0400002275.mm.1                     | Atp6v0d2   | 258.73   | 227.84   | 223.16   | 385.24   | 326.18   | 451.58   |
| TC0300001447.mm.1                     | Gbp2       | 243.10   | 202.11   | 180.88   | 390.28   | 308.40   | 409.37   |
| TC0900001603.mm.1                     | Eif1b      | 1417.62  | 1314.27  | 1198.28  | 1883.34  | 1736.94  | 2191.89  |
| TC1300001461.mm.1                     | Gpr137b    | 5464.41  | 5507.77  | 5155.34  | 7366.90  | 6586.79  | 8245.21  |
| TC1900000889.mm.1                     | Ndufs8     | 18588.81 | 16483.55 | 14117.32 | 23037.71 | 25087.95 | 27145.96 |
| TC0600003342.mm.1                     | Eps8       | 59.59    | 54.67    | 55.45    | 83.13    | 68.78    | 84.12    |
| TC0800000737.mm.1                     | Nr2c2ap    | 203.72   | 181.80   | 171.88   | 241.24   | 234.20   | 263.63   |
| TC1000002093.mm.1                     | Aim1       | 42.54    | 38.91    | 38.50    | 55.44    | 47.40    | 52.44    |
| TC1800000682.mm.1                     | Sec11c     | 340.75   | 365.48   | 353.42   | 427.02   | 453.74   | 515.88   |
| TC1500002250.mm.1                     | Galnt6     | 85.69    | 90.38    | 78.35    | 119.28   | 104.25   | 124.42   |
| TC1900000888.mm.1                     | Tcirg1     | 3076.82  | 3077.79  | 2651.47  | 4146.95  | 3774.60  | 4618.26  |
| TC1_GL456211_random000000030<br>.mm.1 |            | 734.23   | 760.02   | 578.20   | 1296.13  | 1167.34  | 1008.98  |
| TC0100003550.mm.1                     | Slamf7     | 161.26   | 190.78   | 156.42   | 252.42   | 224.11   | 273.43   |
| TC1600001343.mm.1                     | Abcc5      | 120.01   | 118.58   | 110.67   | 158.76   | 139.10   | 168.78   |
| TC1100003506.mm.1                     | Scpep1     | 4195.04  | 4079.84  | 3660.21  | 5614.48  | 4933.40  | 5994.35  |
| TC1300001016.mm.1                     | Gm21726    | 16.15    | 14.12    | 13.84    | 20.25    | 18.34    | 21.59    |
| TC0400003323.mm.1                     | Tex38      | 14.47    | 15.73    | 14.75    | 20.79    | 20.20    | 17.59    |

|                   |                  |         |         |         |          |          |          |
|-------------------|------------------|---------|---------|---------|----------|----------|----------|
| TC1700001938.mm.1 | D17H6S56E-5      | 1107.13 | 1112.32 | 941.28  | 1518.33  | 1359.72  | 1650.38  |
| TC1000001286.mm.1 | Osbpl8           | 2844.59 | 3217.73 | 2721.15 | 4719.78  | 3943.13  | 5325.95  |
| TC0700004309.mm.1 | Maz              | 232.91  | 212.42  | 184.73  | 321.01   | 277.09   | 314.47   |
| TC1700000362.mm.1 | Cln7             | 469.90  | 427.16  | 388.73  | 646.20   | 559.77   | 703.13   |
| TC1500001657.mm.1 | Ndrgr1           | 111.39  | 97.70   | 98.19   | 157.35   | 127.96   | 148.66   |
| TC0X00002556.mm.1 | Gk               | 143.34  | 156.56  | 153.38  | 217.88   | 188.37   | 242.15   |
| TC0800002599.mm.1 | Asna1            | 5114.81 | 4565.05 | 3714.54 | 7462.91  | 6515.80  | 7773.71  |
| TC0500002755.mm.1 | Cxcl9            | 163.07  | 162.05  | 168.54  | 400.11   | 250.98   | 420.15   |
| TC0100000711.mm.1 | Agfg1            | 7653.82 | 7987.24 | 7081.02 | 9381.60  | 9891.44  | 11254.73 |
| TC1700001322.mm.1 | Ppp1r21          | 246.86  | 259.70  | 214.25  | 330.78   | 302.65   | 329.04   |
| TC0800000759.mm.1 | Lsm4             | 2839.42 | 2778.65 | 2184.81 | 3902.26  | 4378.46  | 3737.12  |
| TC0500002234.mm.1 | Gm5553           | 397.50  | 359.08  | 381.26  | 730.87   | 531.93   | 806.24   |
| TC1400002464.mm.1 | Dnajc15          | 1707.59 | 1595.38 | 1920.79 | 2651.17  | 2780.96  | 3772.19  |
| TC0800001259.mm.1 | Sntb2            | 372.33  | 372.79  | 359.43  | 502.68   | 440.10   | 549.62   |
| TC0X00001795.mm.1 | Was              | 418.58  | 405.14  | 396.01  | 586.42   | 479.70   | 544.95   |
| TC0700000794.mm.1 | Klk1b4           | 16.98   | 17.67   | 15.47   | 26.42    | 22.74    | 21.30    |
| TC0100002349.mm.1 | Pgap1            | 272.17  | 279.89  | 248.01  | 400.50   | 339.57   | 443.43   |
| TC0600001205.mm.1 | Arl8b            | 9328.85 | 8483.97 | 8255.49 | 13194.18 | 10802.21 | 13540.94 |
| TC1300001640.mm.1 | Hist1h4c         | 241.67  | 203.24  | 199.61  | 328.42   | 278.59   | 303.10   |
| TC0700004320.mm.1 | Dctpp1           | 1162.74 | 936.45  | 1085.51 | 1625.08  | 1492.56  | 1971.01  |
| TC1300001069.mm.1 | Wdr41            | 603.73  | 552.71  | 529.34  | 773.71   | 692.20   | 850.46   |
| TC0100003670.mm.1 | Mixl1            | 13.97   | 16.03   | 12.28   | 22.58    | 28.18    | 20.89    |
| TC0100001244.mm.1 | Ptpn7            | 256.92  | 257.48  | 221.73  | 417.41   | 363.09   | 547.06   |
| TC0500000992.mm.1 | Cds1             | 41.92   | 37.31   | 42.62   | 54.39    | 48.55    | 55.74    |
| TC0500001401.mm.1 | P2rx4            | 4099.81 | 4151.42 | 3576.01 | 5781.46  | 4908.12  | 5965.65  |
| TC0800002925.mm.1 | Il34             | 17.62   | 17.36   | 18.62   | 23.72    | 20.48    | 23.61    |
| TC1800000610.mm.1 | Iigp1            | 34.19   | 34.87   | 34.92   | 58.14    | 47.54    | 71.30    |
| TC1700002224.mm.1 | A530064D06Rik    | 61.65   | 52.82   | 44.13   | 125.69   | 82.80    | 109.76   |
| TC0800001320.mm.1 | Mtss1l           | 92.40   | 92.36   | 80.86   | 155.30   | 115.58   | 148.39   |
| TC0700001178.mm.1 | Tm6sf1           | 927.53  | 914.63  | 877.07  | 1177.74  | 1032.31  | 1207.77  |
| TC0500000848.mm.1 | Cxcl1            | 32.14   | 24.68   | 29.02   | 40.64    | 39.66    | 39.59    |
| TC0900001377.mm.1 | Ifrd2            | 144.30  | 131.06  | 128.44  | 171.48   | 155.90   | 172.48   |
| TC0600001637.mm.1 | Dera             | 144.26  | 126.91  | 125.30  | 169.16   | 157.26   | 168.55   |
| TC1600001785.mm.1 | Olfr181          | 11.24   | 11.18   | 13.47   | 18.19    | 16.04    | 15.77    |
| TC0600002480.mm.1 | Atoh8            | 32.60   | 34.36   | 38.71   | 45.92    | 43.75    | 49.90    |
| TC0700002927.mm.1 | Gm21028          | 20.66   | 18.72   | 23.44   | 34.89    | 27.69    | 32.40    |
| TC1000002517.mm.1 | Lsm7             | 335.64  | 302.62  | 300.02  | 384.89   | 420.71   | 474.39   |
| TC1800000728.mm.1 | Mc5r             | 11.24   | 11.65   | 14.11   | 16.33    | 19.79    | 18.95    |
| TC0600000470.mm.1 | Olfr449          | 15.66   | 16.21   | 20.43   | 24.55    | 27.09    | 24.97    |
| TC0100003593.mm.1 | Al607873         | 3302.91 | 3533.91 | 3246.60 | 5131.80  | 4070.88  | 4986.09  |
| TC1200001245.mm.1 | Klc1             | 425.59  | 454.50  | 418.26  | 549.96   | 492.93   | 565.53   |
| TC1100004265.mm.1 | Igtp             | 665.55  | 547.72  | 547.44  | 873.34   | 806.60   | 1042.02  |
| TC0300003246.mm.1 | Gstm3            | 67.65   | 65.14   | 56.38   | 97.49    | 109.59   | 83.05    |
| TC1700001618.mm.1 | Amdhd2           | 116.34  | 117.14  | 112.66  | 165.04   | 139.54   | 180.66   |
| TC1000001190.mm.1 | Lum              | 132.14  | 130.73  | 125.30  | 191.97   | 173.01   | 153.78   |
| TC0200005013.mm.1 | Samhd1           | 1419.91 | 1318.54 | 1353.36 | 1950.72  | 1628.60  | 2042.66  |
| TC0600001810.mm.1 | Pdk4             | 2212.99 | 2240.13 | 2072.75 | 2908.19  | 2649.38  | 3329.90  |
| TC0200002308.mm.1 | Hck              | 399.16  | 364.79  | 309.94  | 576.11   | 477.34   | 575.16   |
| TC0700004002.mm.1 | Gvin1;<br>Gm4070 | 158.54  | 147.93  | 120.27  | 257.04   | 228.72   | 353.49   |
| TC0300002920.mm.1 | 5730508B09Rik    | 497.10  | 529.45  | 447.30  | 819.60   | 631.86   | 725.55   |
| TC0500002623.mm.1 | Kdr              | 62.35   | 61.79   | 61.07   | 82.89    | 74.77    | 95.73    |
| TC0200002698.mm.1 | Npepl1           | 238.37  | 206.12  | 187.01  | 288.37   | 280.32   | 318.33   |
| TC0700000522.mm.1 | Rasgrp4          | 33.79   | 32.75   | 30.46   | 45.17    | 37.86    | 43.58    |
| TC1300000385.mm.1 | Bphl             | 37.32   | 35.31   | 34.57   | 48.87    | 41.68    | 50.62    |
| TC1700001395.mm.1 | Tagap1           | 818.60  | 814.02  | 772.18  | 960.90   | 1228.44  | 1172.10  |
| TC0900000854.mm.1 | 2810417H13Rik    | 496.64  | 494.73  | 505.87  | 725.40   | 665.63   | 582.68   |
| TC1700000706.mm.1 | Nrm              | 149.59  | 148.28  | 132.64  | 218.90   | 175.04   | 202.45   |
| TC1100001849.mm.1 | Kcnj2            | 30.63   | 26.51   | 25.94   | 47.65    | 35.89    | 46.11    |
| TC0700002049.mm.1 | Taldo1           | 293.76  | 272.20  | 267.80  | 391.46   | 326.73   | 391.55   |
| TC0400000869.mm.1 | Dennd4c          | 763.78  | 839.54  | 717.17  | 1116.28  | 946.38   | 1154.08  |
| TC0200001256.mm.1 | Olfr1026         | 9.81    | 10.09   | 10.18   | 11.73    | 14.53    | 13.14    |
| TC0400002796.mm.1 | Ambp             | 78.15   | 68.49   | 63.17   | 88.81    | 91.85    | 92.07    |
| TC1400001086.mm.1 | Epsti1           | 167.71  | 162.30  | 153.05  | 218.46   | 192.71   | 241.53   |
| TC1100003159.mm.1 | Ctns             | 515.14  | 500.32  | 445.72  | 705.02   | 587.92   | 684.42   |
| TC1900000184.mm.1 | Rab3il1          | 379.40  | 357.84  | 340.96  | 478.26   | 430.20   | 530.39   |
| TC1800000358.mm.1 | Pcdhb4           | 9.89    | 10.38   | 10.84   | 14.84    | 15.86    | 12.46    |
| TC1400001676.mm.1 | Sh3bp5           | 59.71   | 64.75   | 62.60   | 108.05   | 78.77    | 93.43    |
| TC1000000158.mm.1 | Mtfr2            | 113.68  | 135.87  | 107.83  | 163.31   | 158.29   | 183.26   |
| TC1100002504.mm.1 | Spdl1            | 63.96   | 61.95   | 70.14   | 87.60    | 77.42    | 92.70    |

|                         |                            |           |           |           |           |           |           |
|-------------------------|----------------------------|-----------|-----------|-----------|-----------|-----------|-----------|
| TC1400002186.mm.1       | Ebpl                       | 70.04     | 73.31     | 79.71     | 86.28     | 97.41     | 96.73     |
| TC0700003593.mm.1       | Fes                        | 426.53    | 385.84    | 343.58    | 510.11    | 487.43    | 509.78    |
| TC1900001026.mm.1       | Fkbp2                      | 806.63    | 661.50    | 659.87    | 1332.95   | 967.54    | 1141.88   |
| TC0800001179.mm.1       | Cklf;<br>A730028G07R<br>ik | 272.98    | 290.54    | 249.81    | 397.01    | 328.03    | 389.70    |
| TC1400000912.mm.1       | Sox7                       | 16.08     | 14.26     | 16.28     | 20.25     | 21.64     | 26.41     |
| TC0800000015.mm.1       | Pet100                     | 114.88    | 114.98    | 134.56    | 154.98    | 200.32    | 198.64    |
| TC0600002418.mm.1       | Vmn1r38                    | 13.60     | 12.10     | 11.91     | 14.84     | 16.83     | 15.69     |
| TC0600002853.mm.1       | Rybp                       | 953.71    | 941.28    | 896.20    | 1434.61   | 1201.54   | 1714.56   |
| TC0300002504.mm.1       | Hist2h4                    | 1598.45   | 1530.82   | 1506.43   | 1984.13   | 1804.49   | 2211.18   |
| TC0700002096.mm.1       | Slc22a18                   | 37.13     | 37.10     | 43.28     | 51.33     | 54.05     | 47.47     |
| TC0400003681.mm.1       | Themis2                    | 2285.84   | 2097.28   | 2053.14   | 3439.53   | 2668.22   | 3550.35   |
| TC0900000333.mm.1       | Rpusd4                     | 39.06     | 38.34     | 37.96     | 54.44     | 47.16     | 63.08     |
| TC1500001702.mm.1       | Gm3244                     | 6023.64   | 5658.60   | 6380.96   | 8190.81   | 6992.31   | 7894.98   |
| TC0900001376.mm.1       | Hyal1; Nat6;<br>Hyal3      | 106.95    | 102.96    | 95.72     | 134.15    | 116.77    | 131.09    |
| TSUnmapped00000050.mm.1 | F630003A18R<br>ik          | 227.12    | 214.90    | 182.10    | 430.07    | 288.79    | 385.19    |
| TC0100003026.mm.1       | Mcm6                       | 406.38    | 376.02    | 346.23    | 586.65    | 463.56    | 553.25    |
| TC1100001241.mm.1       | Slnf4                      | 96.68     | 81.90     | 80.43     | 129.03    | 115.78    | 156.11    |
| TC0600001088.mm.1       | Lsm3                       | 70.65     | 56.17     | 64.94     | 98.73     | 82.04     | 91.39     |
| TC0800002553.mm.1       | Tecr                       | 42813.82  | 42525.89  | 38094.54  | 57333.84  | 48271.14  | 55794.92  |
| TC1000002036.mm.1       | Slc16a10                   | 486.64    | 547.66    | 411.75    | 739.15    | 657.78    | 829.78    |
| TC1100003314.mm.1       | Lgals9                     | 27744.36  | 30558.02  | 24477.75  | 35255.05  | 35712.43  | 36435.64  |
| TC1100002755.mm.1       | Pdlim4                     | 188.34    | 176.71    | 184.37    | 257.72    | 211.50    | 255.44    |
| TC0100001957.mm.1       | Cpa6                       | 28.52     | 28.51     | 24.94     | 33.23     | 37.35     | 41.04     |
| TC1500002031.mm.1       | Alg12                      | 94.20     | 83.36     | 82.68     | 109.26    | 100.50    | 108.45    |
| TC0400001129.mm.1       | Ndc1                       | 366.48    | 349.14    | 339.89    | 490.91    | 404.98    | 481.33    |
| TC1100000712.mm.1       | Hist3h2ba                  | 108.55    | 92.59     | 102.41    | 147.24    | 123.57    | 131.16    |
| TC1100002030.mm.1       | Slc25a10                   | 134.82    | 130.88    | 117.95    | 170.12    | 157.85    | 197.38    |
| TC1000000482.mm.1       | Gm5423                     | 1583.97   | 1258.96   | 1110.21   | 2791.36   | 1937.33   | 2607.78   |
| TC1100002106.mm.1       | Mtfp1                      | 16.90     | 16.13     | 19.49     | 21.34     | 23.26     | 22.78     |
| TC0700000561.mm.1       | Tyrobp                     | 241652.10 | 207825.40 | 217424.60 | 284574.00 | 259598.40 | 285502.20 |
| TC0700004607.mm.1       | Fadd                       | 48.29     | 47.27     | 53.07     | 73.17     | 69.62     | 58.83     |
| TC1300002751.mm.1       | Tcstv1                     | 11.92     | 11.31     | 14.23     | 16.57     | 16.67     | 16.20     |
| TC1200000819.mm.1       | Isca2                      | 402.46    | 364.16    | 396.24    | 557.82    | 455.11    | 551.77    |
| TC0200003865.mm.1       | Calcr1                     | 145.23    | 137.86    | 115.27    | 183.78    | 174.57    | 210.07    |
| TC0700003946.mm.1       | Trim30d                    | 176.91    | 164.58    | 151.96    | 233.89    | 208.09    | 275.31    |
| TC0600002555.mm.1       | Htra2                      | 607.59    | 597.86    | 509.09    | 810.51    | 713.35    | 888.57    |
| TC1300000019.mm.1       | Akr1c13                    | 42.72     | 38.55     | 38.90     | 57.51     | 47.07     | 57.17     |
| TC0600000772.mm.1       | Mad211                     | 456.38    | 414.43    | 369.73    | 605.94    | 520.80    | 654.54    |
| TC1100004122.mm.1       | Rhbdf2                     | 241.77    | 211.78    | 218.39    | 303.10    | 261.35    | 306.14    |
| TC0300001076.mm.1       | Slc16a1                    | 158.34    | 138.93    | 146.14    | 216.72    | 181.51    | 240.53    |
| TC1100000049.mm.1       | Zmat5                      | 441.96    | 419.72    | 343.86    | 554.83    | 524.65    | 567.23    |
| TC0600003532.mm.1       | Arpc4                      | 197.69    | 168.70    | 168.59    | 226.73    | 217.12    | 246.81    |
| TC1000002392.mm.1       | Mmp11                      | 62.12     | 48.61     | 48.82     | 81.16     | 69.57     | 82.13     |
| TC1700002368.mm.1       | Efna5                      | 73.32     | 63.43     | 66.03     | 89.76     | 79.14     | 92.62     |
| TC1100000892.mm.1       | Aurkb                      | 203.52    | 189.46    | 167.33    | 269.97    | 227.62    | 260.71    |
| TC0200001874.mm.1       | Slc24a5                    | 97.73     | 90.59     | 92.92     | 138.29    | 110.55    | 142.25    |
| TC1300002541.mm.1       | Mrps36                     | 206.82    | 192.39    | 193.31    | 291.53    | 233.42    | 253.64    |
| TC1700000879.mm.1       | Mrps18a                    | 119.76    | 117.07    | 113.25    | 184.53    | 140.48    | 157.28    |
| TC0400002660.mm.1       | Vma21-ps                   | 386.35    | 331.77    | 329.37    | 468.93    | 516.53    | 659.37    |
| TC0700000787.mm.1       | Egfbp2;<br>Klk1b26         | 14.72     | 13.76     | 15.66     | 18.84     | 21.25     | 17.49     |
| TC1100001386.mm.1       | Trim25                     | 679.13    | 687.22    | 734.01    | 887.26    | 828.60    | 1027.14   |
| TC0900001345.mm.1       | Dusp7                      | 1501.64   | 1497.55   | 1262.75   | 2125.86   | 1763.98   | 2256.00   |
| TC0900000141.mm.1       | Olfr832                    | 9.10      | 7.85      | 7.78      | 10.22     | 9.87      | 10.91     |
| TC1900000996.mm.1       | Gm19505                    | 81.89     | 72.36     | 71.18     | 95.06     | 114.95    | 94.82     |
| TC0200000593.mm.1       | Pthr1                      | 96.28     | 96.76     | 81.24     | 132.03    | 111.82    | 137.44    |
| TC1300001902.mm.1       | Dtnbp1                     | 456.81    | 417.19    | 388.02    | 569.42    | 514.58    | 648.37    |
| TC1700001027.mm.1       | Tnfsf9                     | 116.79    | 106.60    | 84.96     | 212.04    | 158.79    | 281.86    |
| TC0400001543.mm.1       | Fabp3                      | 235.33    | 216.43    | 203.44    | 286.28    | 269.09    | 338.40    |
| TC0400002576.mm.1       | Exosc3                     | 166.59    | 186.42    | 159.95    | 231.41    | 201.68    | 242.42    |
| TC1800000708.mm.1       | Psmg2                      | 2192.53   | 2359.76   | 1991.34   | 2955.10   | 2563.00   | 2892.37   |
| TC0500001932.mm.1       | Rundc3b                    | 15.25     | 15.73     | 16.32     | 21.00     | 20.90     | 17.67     |
| TC1300002304.mm.1       | Nkd2                       | 161.52    | 155.24    | 138.48    | 224.66    | 187.30    | 252.30    |
| TC1900001342.mm.1       | Plgrkt                     | 161.27    | 151.04    | 148.97    | 195.32    | 170.45    | 194.66    |
| TC0300000159.mm.1       | Nceh1                      | 411.52    | 449.66    | 394.61    | 580.38    | 496.75    | 633.10    |
| TC1000002497.mm.1       | Adamts15                   | 64.18     | 60.03     | 54.72     | 79.01     | 69.24     | 78.45     |
| TC1900001340.mm.1       | Insl6                      | 46.92     | 43.22     | 43.24     | 72.12     | 55.38     | 81.01     |
| TC1400001174.mm.1       | Uchl3                      | 1822.67   | 1582.20   | 1412.16   | 2553.17   | 2044.10   | 2365.03   |
| TC1700001213.mm.1       | Morn2                      | 170.50    | 139.58    | 146.40    | 277.40    | 200.95    | 222.23    |
| TC0200004019.mm.1       | Olfr1180                   | 11.29     | 13.08     | 13.65     | 17.16     | 19.63     | 15.73     |

|                   |                                                     |          |          |          |          |          |          |
|-------------------|-----------------------------------------------------|----------|----------|----------|----------|----------|----------|
| TC0400001773.mm.1 | Atp13a2                                             | 400.60   | 374.28   | 336.18   | 504.43   | 441.64   | 537.61   |
| TC0500002434.mm.1 | Gm8069                                              | 868.10   | 698.55   | 733.46   | 1286.08  | 988.31   | 1402.99  |
| TC0700002167.mm.1 | Hspbp1                                              | 270.69   | 242.90   | 203.81   | 331.72   | 318.89   | 321.02   |
| TC0200001002.mm.1 | Nostrin                                             | 97.03    | 92.31    | 88.09    | 132.87   | 106.38   | 130.51   |
| TC0X00000131.mm.1 | Mid1ip1                                             | 133.84   | 123.36   | 107.17   | 197.72   | 151.66   | 194.72   |
| TC1600001277.mm.1 | 2610318N02R<br>ik                                   | 133.82   | 123.75   | 84.03    | 197.00   | 179.70   | 220.82   |
| TC0700000424.mm.1 | Tgfb1                                               | 14988.84 | 14031.58 | 13180.17 | 20888.38 | 16588.60 | 21284.95 |
| TC0X00003361.mm.1 | Prps2                                               | 403.25   | 392.23   | 354.70   | 548.44   | 446.19   | 545.10   |
| TC1000000097.mm.1 | Adat2                                               | 542.95   | 487.67   | 429.36   | 651.09   | 607.79   | 628.17   |
| TC0200005271.mm.1 | Aurka                                               | 285.40   | 245.16   | 251.19   | 331.19   | 311.00   | 372.12   |
| TC0100003210.mm.1 | Rgs18                                               | 503.24   | 612.67   | 518.00   | 704.16   | 713.34   | 866.11   |
| TC0200004737.mm.1 | Kif16b                                              | 136.31   | 131.25   | 129.48   | 186.37   | 151.10   | 192.41   |
| TC0400003894.mm.1 | Efhd2                                               | 2059.23  | 2181.59  | 1763.33  | 2476.94  | 2782.09  | 3088.65  |
| TC0500003729.mm.1 | Gbp8                                                | 31.85    | 26.23    | 26.06    | 35.09    | 36.06    | 35.62    |
| TC1300001378.mm.1 | Akr1c12                                             | 16.89    | 17.06    | 15.26    | 22.63    | 19.50    | 25.56    |
| TC0900001038.mm.1 | Gclc                                                | 921.46   | 866.96   | 783.08   | 1174.55  | 1019.77  | 1285.22  |
| TC1500001568.mm.1 | Atad2                                               | 315.01   | 340.89   | 307.58   | 438.28   | 363.46   | 415.13   |
| TC1800001118.mm.1 | Sft2d3                                              | 68.68    | 70.74    | 66.56    | 77.88    | 98.02    | 95.54    |
| TC0800002658.mm.1 | Snx20                                               | 48.98    | 36.82    | 39.62    | 69.03    | 53.99    | 66.14    |
| TC1900000090.mm.1 | Slc25a45                                            | 112.44   | 117.96   | 98.25    | 148.01   | 132.31   | 164.75   |
| TC0600000854.mm.1 | Retsat                                              | 158.57   | 137.55   | 119.93   | 198.14   | 181.78   | 231.00   |
| TC0500001152.mm.1 | Chek2                                               | 134.33   | 110.68   | 116.77   | 170.25   | 144.29   | 159.47   |
| TC1300001564.mm.1 | Hist1h4n;<br>Hist1h4m                               | 113.37   | 102.08   | 115.28   | 173.86   | 131.77   | 151.57   |
| TC0700000228.mm.1 | Tmem160                                             | 7195.62  | 5874.12  | 6365.32  | 7849.92  | 8850.17  | 9705.73  |
| TC1300000205.mm.1 | Vmn1r200                                            | 12.75    | 16.03    | 13.96    | 17.42    | 18.67    | 19.15    |
| TC0300000910.mm.1 | Mcl1                                                | 1469.27  | 1642.05  | 1426.75  | 1949.23  | 1720.81  | 1908.55  |
| TC0900001828.mm.1 | Olfr867                                             | 11.56    | 9.05     | 10.40    | 12.73    | 14.10    | 14.28    |
| TC1300000181.mm.1 | Hist1h2ao;<br>Hist1h2ap;<br>Hist1h2ai;<br>Hist1h2ah | 984.34   | 766.35   | 813.59   | 1384.68  | 1111.40  | 1174.60  |
| TC0300002352.mm.1 | Cks1b                                               | 1272.39  | 1254.67  | 1230.59  | 1655.85  | 1379.04  | 1629.81  |
| TC0300000787.mm.1 | Dennd4b                                             | 203.03   | 182.74   | 164.80   | 259.81   | 221.42   | 274.64   |
| TC1300000969.mm.1 | Cetn3                                               | 254.72   | 199.57   | 218.67   | 299.78   | 279.37   | 324.36   |
| TC0800002338.mm.1 | Gm9755                                              | 411.73   | 395.41   | 379.97   | 510.41   | 468.34   | 606.23   |
| TC0600000340.mm.1 | Tmem140                                             | 101.24   | 112.85   | 93.69    | 141.51   | 123.64   | 157.30   |
| TC1400000440.mm.1 | Gm8126                                              | 10.76    | 10.47    | 11.81    | 14.21    | 16.40    | 13.00    |
| TC1500000742.mm.1 | Sreb2                                               | 2164.41  | 1997.14  | 1855.09  | 2767.36  | 2323.28  | 2830.12  |
| TC0900002593.mm.1 | Ccnb2                                               | 782.05   | 704.91   | 653.95   | 955.18   | 830.67   | 932.85   |
| TC1900001004.mm.1 | Arl2                                                | 1246.43  | 1391.81  | 1090.76  | 1734.71  | 1525.58  | 1679.64  |
| TC0200001843.mm.1 | Sord                                                | 159.73   | 130.44   | 116.45   | 299.66   | 186.23   | 287.16   |
| TC0500000816.mm.1 | Dck                                                 | 193.81   | 200.30   | 180.46   | 294.59   | 222.81   | 275.45   |
| TC0200003132.mm.1 | Tor4a                                               | 209.13   | 206.86   | 177.56   | 298.13   | 234.93   | 292.41   |
| TC0600001443.mm.1 | Lpar5                                               | 183.12   | 163.57   | 210.73   | 303.04   | 332.11   | 236.09   |
| TC1200002269.mm.1 | Ifi27l2a                                            | 388.77   | 370.69   | 355.03   | 494.39   | 465.27   | 637.89   |
| TC1700002490.mm.1 | Emilin2                                             | 279.76   | 294.30   | 282.87   | 364.22   | 329.57   | 423.09   |
| TC1800000444.mm.1 | Gm3650                                              | 252.72   | 218.85   | 227.91   | 366.28   | 294.48   | 446.85   |
| TC0400001890.mm.1 | Gm13248                                             | 466.19   | 473.89   | 417.59   | 635.01   | 569.20   | 804.01   |
| TC0700001589.mm.1 | Olfr477                                             | 8.10     | 8.99     | 9.37     | 10.74    | 15.47    | 14.15    |
| TC1000001936.mm.1 | Rspo3                                               | 67.97    | 59.95    | 56.17    | 83.81    | 73.02    | 90.96    |
| TC0X00000521.mm.1 | Gm10477                                             | 9.35     | 9.61     | 9.72     | 12.23    | 17.10    | 12.70    |
| TC0900002064.mm.1 | Olfr919                                             | 17.36    | 16.38    | 15.76    | 22.44    | 18.44    | 21.71    |
| TC0500000171.mm.1 | Fgl2                                                | 19.73    | 23.51    | 20.94    | 28.52    | 29.08    | 39.43    |
| TC1200000647.mm.1 | Prkch                                               | 270.40   | 259.84   | 244.84   | 346.04   | 294.49   | 375.77   |
| TC0700004630.mm.1 | Hsd3b7                                              | 57.43    | 54.59    | 46.57    | 70.17    | 62.91    | 70.54    |
| TC1600001722.mm.1 | Alcam                                               | 1408.42  | 1453.03  | 1291.09  | 1862.77  | 1587.59  | 2018.48  |
| TC1300001453.mm.1 | Prl2c2                                              | 18.09    | 15.43    | 17.30    | 36.87    | 22.22    | 38.22    |
| TC1000001270.mm.1 | Pawr                                                | 175.08   | 161.16   | 169.89   | 278.55   | 198.18   | 259.74   |
| TC1400001182.mm.1 | Irg1                                                | 158.65   | 143.27   | 133.92   | 204.42   | 174.09   | 232.81   |
| TC1700002095.mm.1 | Gm21903                                             | 13.12    | 16.61    | 15.00    | 19.93    | 20.45    | 26.94    |
| TC1100001236.mm.1 | Slfn5                                               | 177.81   | 170.36   | 152.10   | 254.74   | 200.02   | 279.64   |
| TC0700002648.mm.1 | LOC10105595<br>3                                    | 901.12   | 894.48   | 888.30   | 1379.11  | 1029.82  | 1196.89  |
| TC0200004649.mm.1 | 1700037H04R<br>ik                                   | 309.99   | 325.43   | 278.84   | 397.32   | 358.92   | 452.63   |
| TC1000003018.mm.1 | Helb                                                | 99.06    | 96.74    | 90.92    | 124.10   | 105.42   | 125.76   |
| TC1900000008.mm.1 | Cpt1a                                               | 1114.17  | 1066.51  | 965.69   | 1368.21  | 1189.73  | 1422.20  |
| TC0800001244.mm.1 | Pla2g15                                             | 2024.92  | 1752.74  | 1708.73  | 2256.48  | 2125.61  | 2373.97  |
| TC0500003243.mm.1 | Hcar2                                               | 76.92    | 68.49    | 71.55    | 119.38   | 97.01    | 87.51    |
| TC1600001419.mm.1 | Cldn1                                               | 10.95    | 12.01    | 13.29    | 14.44    | 15.85    | 17.92    |
| TC0X00000181.mm.1 | Maoa                                                | 101.60   | 100.66   | 87.36    | 139.27   | 113.79   | 151.14   |
| TC1900001118.mm.1 | Ccdc86                                              | 191.46   | 170.94   | 172.66   | 236.10   | 199.31   | 235.36   |



|                                  |                     |          |          |          |           |          |           |
|----------------------------------|---------------------|----------|----------|----------|-----------|----------|-----------|
| TC0X00001799.mm.1                | Ebp                 | 110.93   | 95.61    | 96.22    | 133.56    | 115.05   | 132.81    |
| TC1_GL456221_random00000002.mm.1 |                     | 1047.81  | 836.54   | 1139.58  | 1323.07   | 1540.81  | 1380.22   |
| TC1000002943.mm.1                | Slc35e3             | 472.56   | 549.89   | 433.36   | 733.26    | 585.32   | 717.19    |
| TC0100003599.mm.1                | lfi202b; lfi205     | 463.00   | 473.66   | 407.52   | 792.65    | 552.14   | 850.60    |
| TC0400002694.mm.1                | Klf4                | 93.08    | 78.10    | 70.75    | 104.69    | 102.61   | 114.07    |
| TC0200004902.mm.1                | Defb26              | 13.02    | 11.08    | 11.33    | 14.95     | 13.58    | 15.84     |
| TC1100001629.mm.1                | Nkiras2;<br>Gm19456 | 107.38   | 99.17    | 87.37    | 143.59    | 115.52   | 137.76    |
| TC0400004127.mm.1                | Fam213b             | 79.51    | 74.53    | 81.97    | 105.50    | 89.95    | 117.93    |
| TC1900000401.mm.1                | Gm3873              | 83242.34 | 75992.21 | 87514.50 | 114944.60 | 93337.55 | 108834.70 |
| TC1400000255.mm.1                | Gm2274              | 1880.75  | 1759.09  | 1511.12  | 2109.60   | 2229.21  | 2604.59   |
| TC0600002405.mm.1                | Gm7144              | 9.27     | 7.81     | 6.58     | 11.67     | 10.27    | 11.43     |
| TC0400001107.mm.1                | Dhcr24              | 2730.73  | 2553.54  | 2164.37  | 3294.85   | 3106.98  | 3935.81   |
| TC0300002114.mm.1                | Rarres1             | 63.40    | 54.05    | 51.70    | 69.06     | 75.77    | 89.62     |
| TC0500003240.mm.1                | Zcchc8              | 1069.23  | 1146.48  | 1076.79  | 1562.14   | 1232.57  | 1590.14   |
| TC1400000524.mm.1                | Peli2               | 100.53   | 88.50    | 86.40    | 150.75    | 108.41   | 138.72    |
| TC0400000743.mm.1                | Tlr4                | 406.52   | 386.22   | 348.22   | 542.80    | 435.44   | 544.50    |
| TC0500001288.mm.1                | Taok3               | 170.57   | 176.03   | 158.43   | 229.84    | 187.13   | 225.24    |
| TC0200001261.mm.1                | Olfr1030            | 12.12    | 12.40    | 14.31    | 19.73     | 15.09    | 18.98     |
| TC0500002480.mm.1                | Tlr1                | 221.39   | 227.79   | 187.97   | 349.57    | 270.88   | 436.58    |
| TC1000003204.mm.1                | Olfr825             | 9.60     | 10.92    | 12.31    | 16.26     | 15.10    | 13.20     |
| TC1300000209.mm.1                | Vmn1r201            | 18.55    | 16.17    | 18.42    | 21.55     | 26.85    | 32.24     |
| TC1300000709.mm.1                | ldnk                | 1922.70  | 1678.32  | 1571.27  | 2003.90   | 2238.60  | 2214.47   |
| TC0200002588.mm.1                | Rnf114              | 474.68   | 439.46   | 430.98   | 574.15    | 492.51   | 591.29    |
| TC1400000252.mm.1                | Gm2260              | 1687.72  | 1571.44  | 1353.55  | 1882.01   | 2003.26  | 2367.66   |
| TC1000001886.mm.1                | Taar9               | 10.17    | 8.74     | 8.86     | 11.60     | 11.09    | 13.97     |
| TC1900001196.mm.1                | Tle4                | 377.58   | 396.35   | 348.26   | 519.43    | 423.82   | 549.14    |
| TSUnmapped00000030.mm.1          | H60a                | 114.09   | 134.70   | 109.74   | 142.41    | 149.30   | 147.07    |
| TC0500002708.mm.1                | Gm11116             | 11.69    | 19.24    | 15.74    | 27.69     | 23.85    | 39.63     |
| TC0600002369.mm.1                | Vmn1r27             | 8.98     | 9.37     | 10.48    | 12.83     | 12.89    | 10.82     |
| TSUnmapped00000055.mm.1          | Mrgpra7             | 15.62    | 19.80    | 16.27    | 20.56     | 23.98    | 24.15     |
| TC0600002362.mm.1                | Vmn1r25             | 19.49    | 20.88    | 19.69    | 30.01     | 35.41    | 23.62     |
| TC0100001167.mm.1                | Il10                | 17.52    | 16.48    | 17.64    | 19.12     | 24.64    | 24.19     |
| TC1100001892.mm.1                | lct1                | 180.16   | 162.26   | 155.26   | 217.34    | 185.75   | 222.33    |
| TC0200001412.mm.1                | 1700029i15Ri<br>k   | 24.16    | 22.93    | 23.27    | 34.18     | 26.14    | 34.22     |
| TC0900002060.mm.1                | Olfr915             | 9.26     | 8.62     | 11.71    | 13.76     | 18.99    | 13.74     |
| TC1300000330.mm.1                | Mboat1              | 106.77   | 89.42    | 84.89    | 148.77    | 111.90   | 149.57    |
| TC0700001594.mm.1                | Olfr494             | 18.09    | 16.90    | 15.05    | 19.17     | 24.19    | 24.27     |
| TC0400002271.mm.1                | Wwp1                | 4217.89  | 4752.31  | 3921.08  | 5596.52   | 5046.55  | 6377.63   |
| TC0X00000587.mm.1                | Ctag2               | 9.13     | 9.90     | 11.29    | 13.24     | 11.73    | 13.04     |
| TC0200003960.mm.1                | Olfr1097            | 6.60     | 7.50     | 8.03     | 16.00     | 10.42    | 10.31     |
| TC0100001317.mm.1                | Uchl5               | 507.59   | 490.35   | 420.87   | 987.86    | 598.73   | 1089.81   |
| TC0900001337.mm.1                | Twf2                | 305.83   | 249.61   | 228.52   | 336.75    | 333.63   | 354.97    |
| TC1200000675.mm.1                | Mthfd1              | 224.24   | 218.26   | 207.82   | 293.79    | 238.15   | 302.11    |
| TC1300001561.mm.1                | Hist1h3i            | 35.93    | 29.76    | 26.49    | 43.04     | 41.13    | 38.59     |
| TC1300002462.mm.1                | F2r                 | 243.81   | 297.69   | 208.63   | 332.94    | 346.57   | 343.97    |
| TC0600003271.mm.1                | Tas2r130            | 9.99     | 9.09     | 11.39    | 14.77     | 11.84    | 14.43     |
| TC0600002348.mm.1                | Vmn1r18             | 15.12    | 11.05    | 15.04    | 23.36     | 17.45    | 24.78     |
| TC0500001459.mm.1                | Gm19631             | 159.39   | 146.79   | 162.02   | 223.96    | 173.40   | 219.12    |
| TC1000003117.mm.1                | Shmt2               | 512.49   | 461.70   | 378.65   | 630.83    | 554.67   | 645.64    |
| TC1200001988.mm.1                | Zfp361i             | 1979.16  | 1927.30  | 1699.12  | 3094.16   | 2219.95  | 2533.14   |
| TC0200004039.mm.1                | Olfr1219            | 11.34    | 11.45    | 13.07    | 19.31     | 22.38    | 14.22     |
| TC1500001733.mm.1                | Gm10238             | 59.99    | 53.90    | 49.65    | 76.92     | 77.99    | 61.96     |
| TC1300001557.mm.1                | Hist1h4k            | 405.47   | 396.20   | 462.38   | 598.55    | 473.35   | 585.34    |
| TC0900003176.mm.1                | Cmtm7               | 962.69   | 811.99   | 791.67   | 1159.50   | 1000.36  | 1312.41   |
| TC0X00001715.mm.1                | Gm21887             | 420.50   | 382.91   | 332.30   | 542.80    | 455.62   | 643.19    |
| TC1400000623.mm.1                | Trav6d-3            | 16.21    | 15.27    | 17.73    | 18.10     | 21.25    | 21.28     |
| TC1800000794.mm.1                | Acaa2               | 447.46   | 371.77   | 350.02   | 474.32    | 499.95   | 582.11    |
| TC1300001669.mm.1                | Acot13              | 2896.96  | 2463.82  | 3208.67  | 4280.79   | 3400.54  | 3930.90   |
| TC1500002316.mm.1                | Gpr84               | 702.55   | 543.06   | 489.68   | 999.23    | 736.56   | 878.70    |
| TC0300002802.mm.1                | Vcam1               | 213.03   | 231.35   | 195.83   | 249.59    | 276.20   | 332.83    |
| TC1700000203.mm.1                | Lix1                | 21.62    | 23.66    | 18.85    | 27.92     | 27.51    | 38.06     |
| TC1900000266.mm.1                | Olfr1461            | 11.88    | 12.97    | 12.32    | 14.42     | 21.92    | 17.98     |
| TC0700000365.mm.1                | Vmn1r183            | 15.76    | 15.19    | 17.30    | 22.24     | 26.47    | 18.57     |
| TC0500001038.mm.1                | Lrrc8b              | 436.25   | 341.27   | 341.31   | 572.99    | 444.83   | 604.42    |
| TC0800000941.mm.1                | Samd1               | 60.13    | 64.26    | 60.05    | 76.88     | 69.37    | 91.65     |
| TC0100001031.mm.1                | Serpinb8            | 93.98    | 81.47    | 76.14    | 110.81    | 98.66    | 129.69    |
| TC1700000772.mm.1                | Olfr107             | 11.27    | 9.08     | 9.84     | 14.03     | 15.13    | 11.59     |
| TC0700000791.mm.1                | Klk1b16             | 13.85    | 11.71    | 15.17    | 18.42     | 15.94    | 18.76     |
| TC1300000612.mm.1                | Syk                 | 167.92   | 171.97   | 160.41   | 223.90    | 180.60   | 230.70    |
| TC0700003907.mm.1                | Olfr67              | 12.55    | 11.02    | 13.53    | 14.20     | 18.01    | 19.24     |
| TC1100000168.mm.1                | Cnrip1              | 429.28   | 355.16   | 312.67   | 585.28    | 461.75   | 734.56    |

|                   |                                          |         |         |         |         |         |         |
|-------------------|------------------------------------------|---------|---------|---------|---------|---------|---------|
| TC1900000908.mm.1 | Rad9a                                    | 216.96  | 188.17  | 172.43  | 286.84  | 223.81  | 259.09  |
| TC0100001370.mm.1 | Ncf2                                     | 511.02  | 491.13  | 454.72  | 660.43  | 534.35  | 695.24  |
| TC0200002496.mm.1 | Wisp2                                    | 3404.56 | 3078.43 | 2717.92 | 4242.63 | 3524.94 | 4516.52 |
| TC1200001971.mm.1 | Atp6v1d                                  | 3542.39 | 3192.59 | 3128.69 | 4343.54 | 3613.25 | 4570.69 |
| TC0900000152.mm.1 | Olfr855                                  | 15.72   | 15.75   | 13.68   | 21.78   | 21.03   | 16.77   |
| TC0200000676.mm.1 | Olfr357                                  | 8.08    | 7.88    | 9.62    | 13.16   | 10.44   | 10.49   |
| TC0500003487.mm.1 | Adap1                                    | 65.41   | 62.18   | 61.53   | 82.23   | 68.22   | 88.15   |
| TC1600001641.mm.1 | Atp6v1a                                  | 1495.68 | 1445.88 | 1333.01 | 1835.49 | 1544.52 | 1903.15 |
| TC0500001764.mm.1 | Arpc1b                                   | 3582.83 | 3176.47 | 3112.20 | 4179.80 | 3693.20 | 4766.83 |
| TC0600002337.mm.1 | Lsm5                                     | 24.46   | 20.42   | 20.99   | 25.41   | 35.45   | 30.00   |
| TC0300002425.mm.1 | Tdpoz1                                   | 8.48    | 9.90    | 11.44   | 13.13   | 13.21   | 12.03   |
| TC0700003996.mm.1 | Gvin1;<br>Gm4070;<br>Gm17757;<br>Gm18853 | 85.43   | 80.67   | 63.50   | 107.28  | 107.34  | 169.01  |
| TC1400000415.mm.1 | Gm2832                                   | 10.63   | 10.08   | 11.62   | 11.79   | 15.01   | 14.17   |
| TC0600003379.mm.1 | Abcc9                                    | 14.69   | 14.51   | 15.34   | 14.39   | 16.08   | 14.14   |
| TC0100001560.mm.1 | Rgs5                                     | 20.93   | 22.13   | 20.52   | 22.20   | 18.66   | 19.50   |
