# Supplementary material for: MicroRNA-26b-5p Inhibits Mouse Liver Fibrogenesis and Angiogenesis by Targeting PDGF Receptor-Beta
Source: PubMed Central journal article supplement (PMC6426711; doi:10.1016/j.omtn.2019.02.014), 2019-02-26
Supplement: mmc3.pdf [file mmc3.pdf]

**MicroRNA-26b-5p Inhibits Mouse Liver Fibrogenesis and Angiogenesis by Targeting PDGF Receptor-beta**

Le Yang#, Chengbin Dong#, Jingjing Yang, Lin Yang, Na Chang, Changbo Qi, Liying Li\*

**Supplementary table 3. KEGG and Reactome pathways in TGF- $\beta$ 1-treated BMSCs with or without miR-26b-5p mimics**

| Term                                                     | Database     | ID            | P-Value   | Corrected P-Value | input_gene                                                                                                                                                                                                                                                                                                                                                                                                                                                                                                 |
|----------------------------------------------------------|--------------|---------------|-----------|-------------------|------------------------------------------------------------------------------------------------------------------------------------------------------------------------------------------------------------------------------------------------------------------------------------------------------------------------------------------------------------------------------------------------------------------------------------------------------------------------------------------------------------|
| Cytokine-cytokine receptor interaction                   | KEGG PATHWAY | mmu04060      | 8.663E-17 | 6.073E-14         | Pbbp, 57349:down Cc12, 20296:up Cc117, 20295:down Cc112, 20293:up Figf, 14205:up Cxc112, 20315:up Tnf, 21926:up Cxc r6, 80901:down Kit1, 17311:up Pdgfc, 54635:down Tnfrsf11b, 18383:up Inhba, 16323:down Tnfsf9, 21950:up Cxc114, 57266:down Vegfb, 22340:up Egfr, 13649:down Cc19, 20308:up Cc16, 20305:up Cc17, 20306:up Cc18, 20307:up Cc13, 20302:up Cc14, 20303:up Tnfrsf12a, 27279:down Cxc19, 17329:up Bmpr1a, 12166:down Vegfa, 22339:down Tgfb2, 21808:down Tgfb3, 21809:down Cx3cr1, 13051:down |
| Extracellular matrix organization                        | Reactome     | R-MMU-1474244 | 1.622E-14 | 5.684E-12         | Ibsp, 15891:up P4ha1, 18451:down Col5a2, 12832:down Col5a1, 12831:down Col12a1, 12816:down Efemp1, 216616:up Col10a1, 12813:up Col3a1, 12825:down Plod2, 26432:down Mmp13, 17386:up Itgall, 319480:down Serpinh1, 12406:down T111, 21892:down Bmp4, 12159:up Vcan, 13003:down Col1a2, 12843:down Lama2, 16773:down Klk1b11, 16613:up Mmp2, 17390:down Ceacam1, 26365:up Col11a1, 12814:down Col8a1, 12837:down Tnc, 21923:down Adamts4, 240913:down Tgfb2, 21808:down Tgfb3, 21809:down                    |
| Collagen biosynthesis and modifying enzymes              | Reactome     | R-MMU-1650814 | 2.884E-10 | 6.740E-08         | Col11a1, 12814:down P4ha1, 18451:down Serpinh1, 12406:down T111, 21892:down Col5a2, 12832:down Col5a1, 12831:down Col12a1, 12816:down Col8a1, 12837:down Col10a1, 12813:up Col1a2, 12843:down Col3a1, 12825:down Plod2, 26432:down                                                                                                                                                                                                                                                                         |
| Collagen formation                                       | Reactome     | R-MMU-1474290 | 1.119E-09 | 1.961E-07         | Col11a1, 12814:down P4ha1, 18451:down Serpinh1, 12406:down T111, 21892:down Col5a2, 12832:down Col5a1, 12831:down Col12a1, 12816:down Col8a1, 12837:down Col10a1, 12813:up Col1a2, 12843:down Col3a1, 12825:down Plod2, 26432:down Mmp13, 17386:up                                                                                                                                                                                                                                                         |
| Platelet degranulation                                   | Reactome     | R-MMU-114608  | 1.746E-09 | 2.246E-07         | Igf2, 16002:up Pbbp, 57349:down Islr, 26968:up Kng1, 16644:up Kng2, 385643:up Vegfb, 22340:up Serping1, 12258:up Cd109, 235505:down Gas6, 14456:up Igf1, 16000:up Trf, 22041:up Vegfa, 22339:down Tgfb2, 21808:down Tgfb3, 21809:down Figf, 14205:up                                                                                                                                                                                                                                                       |
| Osteoclast differentiation                               | KEGG PATHWAY | mmu04380      | 1.922E-09 | 2.246E-07         | Gm15448, 100041146:up Pira11, 18724:up Sirpb1a, 320832:down Lilra6, 18726:up Pira7, 18730:up Pira1, 18722:up Pira4, 18727:up Pira6, 18729:up Pparg, 19016:up Pira2, 18725:up Tnf, 21926:up Sirpb1b, 668101:down Tgfb2, 21808:down Gm14548, 100038909:up Tnfrsf11b, 18383:up                                                                                                                                                                                                                                |
| Response to elevated platelet cytosolic Ca <sup>2+</sup> | Reactome     | R-MMU-76005   | 2.800E-09 | 2.804E-07         | Igf2, 16002:up Pbbp, 57349:down Islr, 26968:up Kng1, 16644:up Kng2, 385643:up Vegfb, 22340:up Serping1, 12258:up Cd109, 235505:down Gas6, 14456:up Igf1, 16000:up Trf, 22041:up Vegfa, 22339:down Tgfb2, 21808:down Tgfb3, 21809:down Figf, 14205:up                                                                                                                                                                                                                                                       |
| Peptide ligand-binding receptors                         | Reactome     | R-MMU-375276  | 2.241E-08 | 1.821E-06         | Cc117, 20295:down Cc19, 20308:up Cxc112, 20315:up Cc16, 20305:up Cc17, 20306:up Kng1, 16644:up Kng2, 385643:up Cc13, 20302:up Cc14, 20303:up Cxc19, 17329:up Pbbp, 57349:down Cc12, 20296:up Ednrb, 13618:up Cx3cr1, 13051:down C3, 12266:up Cxcr6, 80901:down                                                                                                                                                                                                                                             |
| Chemokine receptors bind chemokines                      | Reactome     | R-MMU-380108  | 2.338E-08 | 1.821E-06         | Cc117, 20295:down Cxc112, 20315:up Cc17, 20306:up Cc13, 20302:up Cc14, 20303:up Cxc19, 17329:up Pbbp, 57349:down Cc12, 20296:up Cx3cr1, 13051:down Cxcr6, 80901:down                                                                                                                                                                                                                                                                                                                                       |
| Degradation of the extracellular matrix                  | Reactome     | R-MMU-1474228 | 4.638E-08 | 3.251E-06         | Col11a1, 12814:down T111, 21892:down Col5a2, 12832:down Col5a1, 12831:down Col12a1, 12816:down Col8a1, 12837:down Adamts4, 240913:down Col10a1, 12813:up Mmp2, 17390:down Klk1b11, 16613:up Col3a1, 12825:down Col1a2, 12843:down Mmp13, 17386:up                                                                                                                                                                                                                                                          |
| AGE-RAGE signaling pathway in diabetic complications     | KEGG PATHWAY | mmu04933      | 6.176E-08 | 3.936E-06         | Mmp2, 17390:down F3, 14066:up Cc12, 20296:up Vegfb, 22340:up Tnf, 21926:up Vegfa, 22339:down Col3a1, 12825:down Tgfb2, 21808:down Tgfb3, 21809:down Col1a2, 12843:down Cc112, 20293:up Figf, 14205:up                                                                                                                                                                                                                                                                                                      |

|                                                                                                                                                     |                 |                   |            |            |                                                                                                                                                                                                                                                                                                                                                                                                                          |
|-----------------------------------------------------------------------------------------------------------------------------------------------------|-----------------|-------------------|------------|------------|--------------------------------------------------------------------------------------------------------------------------------------------------------------------------------------------------------------------------------------------------------------------------------------------------------------------------------------------------------------------------------------------------------------------------|
| Class A/1<br>(Rhodopsin-like<br>receptors)                                                                                                          | Reactome        | R-MMU-<br>373076  | 7. 826E-08 | 4. 572E-06 | Ednrb, 13618:up Cc117, 20295:down Cc19, 20308:up Cxc112, 20315:up Cc14, 20303:up Cc16, 20305:up Cc17, 20306:up Kng1, 16644:up Kng2, 385643:up Cc13, 20302:up Cxc6, 80901:down Cxc19, 17329:up Pbbp, 57349:down Ptgir, 19222:up Cc12, 20296:up C3, 12266:up Cx3cr1, 13051:down Htr2b, 15559:down Htr2a, 15558:down                                                                                                        |
| Collagen<br>degradation                                                                                                                             | Reactome        | R-MMU-<br>1442490 | 9. 361E-08 | 5. 048E-06 | Col11a1, 12814:down Col5a2, 12832:down Col5a1, 12831:down Col12a1, 12816:down Col8a1, 12837:down Col10a1, 12813:up Mmp2, 17390:down Col3a1, 12825:down Col1a2, 12843:down Mmp13, 17386:up                                                                                                                                                                                                                                |
| Hemostasis                                                                                                                                          | Reactome        | R-MMU-<br>109582  | 1. 984E-07 | 9. 387E-06 | Pbbp, 57349:down Islr, 26968:up Prkar2b, 19088:up Kng1, 16644:up Gas6, 14456:up Figf, 14205:up Sirpb1a, 320832:down Dok2, 13449:up Plat, 18791:down Serping1, 12258:up Igf2, 16002:up Igf1, 16000:up Serpine2, 20720:up Kng2, 385643:up Vegfb, 22340:up Sirpb1b, 668101:down Trf, 22041:up Col1a2, 12843:down Ceacam1, 26365:up Cd109, 235505:down Ptgir, 19222:up Vegfa, 22339:down Tgfb2, 21808:down Tgfb3, 21809:down |
| Assembly of<br>collagen fibrils<br>and other<br>multimeric<br>structures                                                                            | Reactome        | R-MMU-<br>2022090 | 2. 009E-07 | 9. 387E-06 | Col11a1, 12814:down T111, 21892:down Col5a2, 12832:down Col5a1, 12831:down Col8a1, 12837:down Col10a1, 12813:up Col1a2, 12843:down Col3a1, 12825:down Mmp13, 17386:up                                                                                                                                                                                                                                                    |
| Chemokine<br>signaling pathway                                                                                                                      | KEGG<br>PATHWAY | mmu04062          | 2. 257E-07 | 9. 887E-06 | Cc18, 20307:up Cc117, 20295:down Cc19, 20308:up Cxc112, 20315:up Cc14, 20303:up Cc16, 20305:up Cc17, 20306:up Cxc114, 57266:down Cc13, 20302:up Cxc6, 80901:down Cxc19, 17329:up Pbbp, 57349:down Cc12, 20296:up Cx3cr1, 13051:down Cxc112, 20293:up                                                                                                                                                                     |
| GPCR ligand<br>binding                                                                                                                              | Reactome        | R-MMU-<br>500792  | 2. 907E-07 | 1. 199E-05 | Ednrb, 13618:up Cc13, 20302:up Glp1r, 14652:down Cc19, 20308:up Cxc112, 20315:up Cc14, 20303:up Cc16, 20305:up Cc17, 20306:up Kng1, 16644:up Kng2, 385643:up Adm, 11535:up Cxc6, 80901:down Cxc19, 17329:up Pbbp, 57349:down Ptgir, 19222:up Cc117, 20295:down Cc12, 20296:up C3, 12266:up Cx3cr1, 13051:down Htr2b, 15559:down Htr2a, 15558:down                                                                        |
| Regulation of<br>Insulin-like<br>Growth Factor<br>(IGF) transport<br>and uptake by<br>Insulin-like<br>Growth Factor<br>Binding Proteins<br>(IGFBPs) | Reactome        | R-MMU-<br>381426  | 5. 303E-07 | 2. 065E-05 | Pappa, 18491:down Igf2, 16002:up Igfbp4, 16010:up Igf1, 16000:up Klk1b11, 16613:up Mmp2, 17390:down Igfbp3, 16009:up                                                                                                                                                                                                                                                                                                     |
| Mineral<br>absorption                                                                                                                               | KEGG<br>PATHWAY | mmu04978          | 6. 255E-07 | 2. 308E-05 | Hmox1, 15368:up Fxyd2, 11936:up Steap1, 70358:down Mt1, 17748:up Trf, 22041:up Slc40a1, 53945:up Vdr, 22337:down Mt2, 17750:up                                                                                                                                                                                                                                                                                           |
| Platelet<br>activation,<br>signaling and<br>aggregation                                                                                             | Reactome        | R-MMU-<br>76002   | 1. 193E-06 | 4. 182E-05 | Igf2, 16002:up Pbbp, 57349:down Islr, 26968:up Kng1, 16644:up Kng2, 385643:up Vegfb, 22340:up Serping1, 12258:up Cd109, 235505:down Gas6, 14456:up Igf1, 16000:up Trf, 22041:up Vegfa, 22339:down Col1a2, 12843:down Tgfb2, 21808:down Tgfb3, 21809:down Figf, 14205:up                                                                                                                                                  |
| Pathways in<br>cancer                                                                                                                               | KEGG<br>PATHWAY | mmu05200          | 1. 549E-06 | 5. 169E-05 | Pparg, 19016:up Lama2, 16773:down Ednrb, 13618:up Vegfa, 22339:down Cxc112, 20315:up Ret, 19713:up Fgfr2, 14183:up Fgfr1, 14182:down Igf1, 16000:up Vegfb, 22340:up Kit1, 17311:up Mmp2, 17390:down Ptgs2, 19225:down Bmp4, 12159:up Wnt5a, 22418:down Epas1, 13819:up Tgfb2, 21808:down Tgfb3, 21809:down Egfr, 13649:down Figf, 14205:up                                                                               |
| Non-integrin<br>membrane-ECM<br>interactions                                                                                                        | Reactome        | R-MMU-<br>3000171 | 4. 678E-06 | 1. 491E-04 | Lama2, 16773:down Col5a2, 12832:down Col5a1, 12831:down Tnc, 21923:down Col10a1, 12813:up Col1a2, 12843:down Col3a1, 12825:down                                                                                                                                                                                                                                                                                          |
| Complement and<br>coagulation<br>cascades                                                                                                           | KEGG<br>PATHWAY | mmu04610          | 7. 382E-06 | 2. 250E-04 | C1s2, 317677:up Plat, 18791:down Kng1, 16644:up Kng2, 385643:up Serping1, 12258:up F3, 14066:up C1s1, 50908:up C3, 12266:up Vsig4, 278180:down                                                                                                                                                                                                                                                                           |
| Protein digestion<br>and absorption                                                                                                                 | KEGG<br>PATHWAY | mmu04974          | 9. 506E-06 | 2. 776E-04 | Col11a1, 12814:down Fxyd2, 11936:up Col5a2, 12832:down Col5a1, 12831:down Col12a1, 12816:down Col10a1, 12813:up Col1a2, 12843:down Col3a1, 12825:down Mme, 17380:up                                                                                                                                                                                                                                                      |

|                                           |              |               |            |            |                                                                                                                                                                                                                                                                                                                                                                                                                                                                                                                                                                                                                                                                                                                                                                                                                                                                                                                                                                                 |
|-------------------------------------------|--------------|---------------|------------|------------|---------------------------------------------------------------------------------------------------------------------------------------------------------------------------------------------------------------------------------------------------------------------------------------------------------------------------------------------------------------------------------------------------------------------------------------------------------------------------------------------------------------------------------------------------------------------------------------------------------------------------------------------------------------------------------------------------------------------------------------------------------------------------------------------------------------------------------------------------------------------------------------------------------------------------------------------------------------------------------|
| Focal adhesion                            | KEGG PATHWAY | mmu04510      | 1. 055E-05 | 2. 959E-04 | Ibsp, 15891:up Itga11, 319480:down Lama2, 16773:down Thbs2, 21826:down Igf1, 16000:up Vegfb, 22340:up Pdgfc, 54635:down Itga5, 16402:down Vegfa, 22339:down Col1a2, 12843:down Tnc, 21923:down Egfr, 13649:down Figf, 14205:up                                                                                                                                                                                                                                                                                                                                                                                                                                                                                                                                                                                                                                                                                                                                                  |
| PI3K-Akt signaling pathway                | KEGG PATHWAY | mmu04151      | 1. 230E-05 | 3. 317E-04 | Ibsp, 15891:up Lama2, 16773:down Itga11, 319480:down Fgfr2, 14183:up Fgfr1, 14182:down Thbs2, 21826:down Igf1, 16000:up Vegfb, 22340:up Kit1, 17311:up Pdgfc, 54635:down Itga5, 16402:down Vegfa, 22339:down Col1a2, 12843:down Creb3, 11, 26427:down Tnc, 21923:down Egfr, 13649:down Figf, 14205:up                                                                                                                                                                                                                                                                                                                                                                                                                                                                                                                                                                                                                                                                           |
| Integrin cell surface interactions        | Reactome     | R-MMU-216083  | 1. 481E-05 | 3. 844E-04 | Ibsp, 15891:up Itga11, 319480:down Col5a2, 12832:down Col5a1, 12831:down Tnc, 21923:down Col3a1, 12825:down Col8a1, 12837:down Col1a2, 12843:down                                                                                                                                                                                                                                                                                                                                                                                                                                                                                                                                                                                                                                                                                                                                                                                                                               |
| ECM proteoglycans                         | Reactome     | R-MMU-3000178 | 2. 618E-05 | 6. 555E-04 | Col5a2, 12832:down Col5a1, 12831:down Tnc, 21923:down Vcan, 13003:down Col1a2, 12843:down Col3a1, 12825:down                                                                                                                                                                                                                                                                                                                                                                                                                                                                                                                                                                                                                                                                                                                                                                                                                                                                    |
| Rheumatoid arthritis                      | KEGG PATHWAY | mmu05323      | 3. 514E-05 | 8. 493E-04 | Cxcl12, 20315:up Ccl2, 20296:up Ccl3, 20302:up Tnf, 21926:up Vegfa, 22339:down Tgfb2, 21808:down Tgfb3, 21809:down Ccl12, 20293:up                                                                                                                                                                                                                                                                                                                                                                                                                                                                                                                                                                                                                                                                                                                                                                                                                                              |
| ECM-receptor interaction                  | KEGG PATHWAY | mmu04512      | 3. 807E-05 | 8. 895E-04 | Ibsp, 15891:up Tnc, 21923:down Itga11, 319480:down Lama2, 16773:down Thbs2, 21826:down Itga5, 16402:down Npnt, 114249:up Col1a2, 12843:down                                                                                                                                                                                                                                                                                                                                                                                                                                                                                                                                                                                                                                                                                                                                                                                                                                     |
| Hematopoietic cell lineage                | KEGG PATHWAY | mmu04640      | 4. 120E-05 | 9. 316E-04 | Cd24a, 12484:down Anpep, 16790:up Cd4, 12504:up Kit1, 17311:up Tnf, 21926:up Itga5, 16402:down Tfrc, 22042:up Mme, 17380:up                                                                                                                                                                                                                                                                                                                                                                                                                                                                                                                                                                                                                                                                                                                                                                                                                                                     |
| Proteoglycans in cancer                   | KEGG PATHWAY | mmu05205      | 5. 752E-05 | 1. 260E-03 | Hpse, 15442:up Fgfr1, 14182:down Igf2, 16002:up Tnf, 21926:up Igf1, 16000:up Itga5, 16402:down Vegfa, 22339:down Wnt5a, 22418:down Col1a2, 12843:down Tgfb2, 21808:down Mmp2, 17390:down Egfr, 13649:down                                                                                                                                                                                                                                                                                                                                                                                                                                                                                                                                                                                                                                                                                                                                                                       |
| Signal Transduction                       | Reactome     | R-MMU-162582  | 1. 031E-04 | 2. 190E-03 | Gplr, 14652:down Wnt5a, 22418:down Ret, 19713:up Prkar2b, 19088:up Kng1, 16644:up Col5a2, 12832:down Col5a1, 12831:down Pbbp, 57349:down Ccl3, 20302:up Adam12, 11489:down Nrg1, 211323:down Inhba, 16323:down Ccl17, 20295:down Htr2b, 15559:down Cxcr6, 80901:down Aldh1a3, 56847:down Kit1, 17311:up Ednrb, 13618:up Plat, 18791:down Cxcl12, 20315:up Cxc19, 17329:up Ccl2, 20296:up Pdgfc, 54635:down Gpc4, 14735:down Igf2, 16002:up Igf1, 16000:up Pr12c2, 18811:up Figf, 14205:up Crabp2, 12904:down Htr2a, 15558:down Rspo2, 239405:up Thbs2, 21826:down Aldh1a2, 19378:up Vegfb, 22340:up Kng2, 385643:up Fabp5, 16592:up Flrt2, 399558:down Lpl, 16956:up Col3a1, 12825:down C3, 12266:up Egfr, 13649:down Ccl9, 20308:up Ccl6, 20305:up Ccl7, 20306:up Fgfr1, 14182:down Adm, 11535:up Ccl4, 20303:up Pmepa1, 65112:down Tnf, 21926:up Bmpr1a, 12166:down Ptgir, 19222:up Vegfa, 22339:down Fstl3, 83554:down Cx3cr1, 13051:down Akr1c18, 105349:up Fgfr2, 14183:up |
| Malaria                                   | KEGG PATHWAY | mmu05144      | 1. 084E-04 | 2. 234E-03 | Ccl2, 20296:up Thbs2, 21826:down Tnf, 21926:up Tgfb2, 21808:down Tgfb3, 21809:down Ccl12, 20293:up                                                                                                                                                                                                                                                                                                                                                                                                                                                                                                                                                                                                                                                                                                                                                                                                                                                                              |
| Initial triggering of complement          | Reactome     | R-MMU-166663  | 1. 172E-04 | 2. 346E-03 | C1s2, 317677:up C1s1, 50908:up C1rb, 667277:up C3, 12266:up                                                                                                                                                                                                                                                                                                                                                                                                                                                                                                                                                                                                                                                                                                                                                                                                                                                                                                                     |
| Axon guidance                             | Reactome     | R-MMU-422475  | 1. 366E-04 | 2. 660E-03 | Sema7a, 20361:down Dok2, 13449:up Cd24a, 12484:down Col5a2, 12832:down Ret, 19713:up Ncam1, 17967:down Fgfr2, 14183:up Fgfr1, 14182:down Kit1, 17311:up Plxnd1, 67784:up Col5a1, 12831:down Vegfa, 22339:down Mmp2, 17390:down Nrg1, 211323:down Col3a1, 12825:down Egfr, 13649:down Dpys13, 22240:down                                                                                                                                                                                                                                                                                                                                                                                                                                                                                                                                                                                                                                                                         |
| Developmental Biology                     | Reactome     | R-MMU-1266738 | 2. 162E-04 | 4. 028E-03 | Fgfr1, 14182:down Cd24a, 12484:down Ret, 19713:up Cdo1, 12583:up Plxnd1, 67784:up Col5a1, 12831:down Col3a1, 12825:down Nrg1, 211323:down Pparg, 19016:up Dok2, 13449:up Ncam1, 17967:down Kit1, 17311:up Egfr, 13649:down Dpys13, 22240:down Mmp2, 17390:down Lgi2, 246316:up Col5a2, 12832:down Fgfr2, 14183:up Sema7a, 20361:down Tnf, 21926:up Vegfa, 22339:down Fabp4, 11770:up                                                                                                                                                                                                                                                                                                                                                                                                                                                                                                                                                                                            |
| EGFR tyrosine kinase inhibitor resistance | KEGG PATHWAY | mmu01521      | 2. 184E-04 | 4. 028E-03 | Fgfr2, 14183:up Igf1, 16000:up Gas6, 14456:up Pdgfc, 54635:down Vegfa, 22339:down Nrg1, 211323:down Egfr, 13649:down                                                                                                                                                                                                                                                                                                                                                                                                                                                                                                                                                                                                                                                                                                                                                                                                                                                            |
| Hypertrophic cardiomyopathy (HCM)         | KEGG PATHWAY | mmu05410      | 2. 688E-04 | 4. 831E-03 | Itga11, 319480:down Lama2, 16773:down Tnf, 21926:up Igf1, 16000:up Itga5, 16402:down Tgfb2, 21808:down Tgfb3, 21809:down                                                                                                                                                                                                                                                                                                                                                                                                                                                                                                                                                                                                                                                                                                                                                                                                                                                        |

|                                                      |              |               |            |            |                                                                                                                                                                                                                                                                                                                                                                                                                                                                                                                      |
|------------------------------------------------------|--------------|---------------|------------|------------|----------------------------------------------------------------------------------------------------------------------------------------------------------------------------------------------------------------------------------------------------------------------------------------------------------------------------------------------------------------------------------------------------------------------------------------------------------------------------------------------------------------------|
| VEGF binds to VEGFR leading to receptor dimerization | Reactome     | R-MMU-195399  | 2. 907E-04 | 4. 970E-03 | Vegfb, 22340:up Vegfa, 22339:down Figf, 14205:up                                                                                                                                                                                                                                                                                                                                                                                                                                                                     |
| VEGF ligand-receptor interactions                    | Reactome     | R-MMU-194313  | 2. 907E-04 | 4. 970E-03 | Vegfb, 22340:up Vegfa, 22339:down Figf, 14205:up                                                                                                                                                                                                                                                                                                                                                                                                                                                                     |
| Dilated cardiomyopathy                               | KEGG PATHWAY | mmu05414      | 3. 501E-04 | 5. 708E-03 | Itga11, 319480:down Lama2, 16773:down Tnf, 21926:up Igf1, 16000:up Itga5, 16402:down Tgfb2, 21808:down Tgfb3, 21809:down                                                                                                                                                                                                                                                                                                                                                                                             |
| Creation of C4 and C2 activators                     | Reactome     | R-MMU-166786  | 3. 956E-04 | 6. 163E-03 | C1s2, 317677:up C1s1, 50908:up C1rb, 667277:up                                                                                                                                                                                                                                                                                                                                                                                                                                                                       |
| Classical antibody-mediated complement activation    | Reactome     | R-MMU-173623  | 3. 956E-04 | 6. 163E-03 | C1s2, 317677:up C1s1, 50908:up C1rb, 667277:up                                                                                                                                                                                                                                                                                                                                                                                                                                                                       |
| Intrinsic Pathway of Fibrin Clot Formation           | Reactome     | R-MMU-140837  | 4. 862E-04 | 7. 410E-03 | Serpine2, 20720:up Kng1, 16644:up Kng2, 385643:up Serpin1, 12258:up                                                                                                                                                                                                                                                                                                                                                                                                                                                  |
| Signaling by PDGF                                    | Reactome     | R-MMU-186797  | 5. 827E-04 | 8. 510E-03 | Fgfr1, 14182:down Plat, 18791:down Ret, 19713:up Fgfr2, 14183:up Prkar2b, 19088:up Thbs2, 21826:down Col5a1, 12831:down Kit1, 17311:up Col5a2, 12832:down Pdgfc, 54635:down Nrg1, 211323:down Col3a1, 12825:down Egfr, 13649:down                                                                                                                                                                                                                                                                                    |
| NCAM1 interactions                                   | Reactome     | R-MMU-419037  | 6. 439E-04 | 9. 212E-03 | Col3a1, 12825:down Col5a1, 12831:down Col5a2, 12832:down Ncam1, 17967:down                                                                                                                                                                                                                                                                                                                                                                                                                                           |
| Pertussis                                            | KEGG PATHWAY | mmu05133      | 8. 419E-04 | 1. 163E-02 | C1s2, 317677:up Serpin1, 12258:up Tnf, 21926:up Itga5, 16402:down C1s1, 50908:up C3, 12266:up                                                                                                                                                                                                                                                                                                                                                                                                                        |
| Chagas disease (American trypanosomiasis)            | KEGG PATHWAY | mmu05142      | 8. 460E-04 | 1. 163E-02 | Cc12, 20296:up Cc13, 20302:up Tnf, 21926:up Tgfb2, 21808:down Tgfb3, 21809:down C3, 12266:up Cc112, 20293:up                                                                                                                                                                                                                                                                                                                                                                                                         |
| Signaling by Retinoic Acid                           | Reactome     | R-MMU-5362517 | 1. 321E-03 | 1. 715E-02 | Fabp5, 16592:up Crabp2, 12904:down Akr1c18, 105349:up Aldh1a2, 19378:up Aldh1a3, 56847:down                                                                                                                                                                                                                                                                                                                                                                                                                          |
| Molecules associated with elastic fibres             | Reactome     | R-MMU-2129379 | 1. 480E-03 | 1. 887E-02 | Tgfb2, 21808:down Tgfb3, 21809:down Efemp1, 216616:up Bmp4, 12159:up                                                                                                                                                                                                                                                                                                                                                                                                                                                 |
| TGF-beta signaling pathway                           | KEGG PATHWAY | mmu04350      | 1. 646E-03 | 2. 030E-02 | Inhba, 16323:down Tnf, 21926:up Bmpr1a, 12166:down Bmp4, 12159:up Tgfb2, 21808:down Tgfb3, 21809:down                                                                                                                                                                                                                                                                                                                                                                                                                |
| Glutathione metabolism                               | KEGG PATHWAY | mmu00480      | 1. 651E-03 | 2. 030E-02 | Gstm1, 14862:up Gstt1, 14871:up Gsta4, 14860:up Anpep, 16790:up Ggt5, 23887:up                                                                                                                                                                                                                                                                                                                                                                                                                                       |
| NCAM signaling for neurite out-growth                | Reactome     | R-MMU-375165  | 1. 719E-03 | 2. 068E-02 | Ret, 19713:up Ncam1, 17967:down Fgfr2, 14183:up Fgfr1, 14182:down Kit1, 17311:up Col5a2, 12832:down Col5a1, 12831:down Nrg1, 211323:down Col3a1, 12825:down Egfr, 13649:down                                                                                                                                                                                                                                                                                                                                         |
| Cell surface interactions at the vascular wall       | Reactome     | R-MMU-202733  | 1. 741E-03 | 2. 068E-02 | Sirpb1a, 320832:down Dok2, 13449:up Sirpb1b, 668101:down Gas6, 14456:up Col1a2, 12843:down Ceacam1, 26365:up                                                                                                                                                                                                                                                                                                                                                                                                         |
| Elastic fibre formation                              | Reactome     | R-MMU-1566948 | 1. 815E-03 | 2. 121E-02 | Tgfb2, 21808:down Tgfb3, 21809:down Efemp1, 216616:up Bmp4, 12159:up                                                                                                                                                                                                                                                                                                                                                                                                                                                 |
| Antagonism of Activin by Follistatin                 | Reactome     | R-MMU-2473224 | 1. 846E-03 | 2. 122E-02 | Fstl3, 83554:down Inhba, 16323:down                                                                                                                                                                                                                                                                                                                                                                                                                                                                                  |
| Complement cascade                                   | Reactome     | R-MMU-166658  | 2. 001E-03 | 2. 262E-02 | C1s2, 317677:up C1s1, 50908:up C1rb, 667277:up C3, 12266:up                                                                                                                                                                                                                                                                                                                                                                                                                                                          |
| Prostate cancer                                      | KEGG PATHWAY | mmu05215      | 2. 050E-03 | 2. 281E-02 | Fgfr2, 14183:up Fgfr1, 14182:down Igf1, 16000:up Pdgfc, 54635:down Creb311, 26427:down Egfr, 13649:down                                                                                                                                                                                                                                                                                                                                                                                                              |
| G alpha (i) signalling events                        | Reactome     | R-MMU-418594  | 2. 199E-03 | 2. 408E-02 | Pbbp, 57349:down Cc19, 20308:up Cxc112, 20315:up Cc16, 20305:up Kng1, 16644:up Kng2, 385643:up Cxc19, 17329:up C3, 12266:up Cxcr6, 80901:down                                                                                                                                                                                                                                                                                                                                                                        |
| Immune System                                        | Reactome     | R-MMU-168256  | 2. 590E-03 | 2. 761E-02 | C1s2, 317677:up Cd200, 17470:down Prkar2b, 19088:up Col1a2, 12843:down Nrg1, 211323:down C1rb, 667277:up Sec23a, 20334:down Sirpb1a, 320832:down S100a1, 20193:up Cd4, 12504:up Kit1, 17311:up Ret, 19713:up C1s1, 50908:up Pr12c2, 18811:up Tnfrsf11b, 18383:up Cr1f1, 12931:down H2-T24, 15042:up Clec4n, 56620:up Sirpb1b, 668101:down I11rn, 16181:up Col3a1, 12825:down Egfr, 13649:down Fgfr2, 14183:up Fgfr1, 14182:down Tnfrsf12a, 27279:down Tnf, 21926:up I11r11, 17082:down Clec2d, 93694:up C3, 12266:up |
| Metallothioneins bind metals                         | Reactome     | R-MMU-5661231 | 2. 744E-03 | 2. 761E-02 | Mt2, 17750:up Mt1, 17748:up                                                                                                                                                                                                                                                                                                                                                                                                                                                                                          |

|                                                                          |              |               |           |           |                                                                                                                                                                                                                    |
|--------------------------------------------------------------------------|--------------|---------------|-----------|-----------|--------------------------------------------------------------------------------------------------------------------------------------------------------------------------------------------------------------------|
| Response to metal ions                                                   | Reactome     | R-MMU-5660526 | 2.744E-03 | 2.761E-02 | Mt2, 17750:up Mt1, 17748:up                                                                                                                                                                                        |
| Gastrin-CREB signalling pathway via PKC and MAPK                         | Reactome     | R-MMU-881907  | 2.807E-03 | 2.761E-02 | Cc19, 20308:up Ret, 19713:up Cc16, 20305:up Fgfr2, 14183:up Fgfr1, 14182:down Kng1, 16644:up Kng2, 385643:up Kit1, 17311:up Nrg1, 211323:down Ednrb, 13618:up Htr2b, 15559:down Htr2a, 15558:down Egfr, 13649:down |
| Leishmaniasis                                                            | KEGG PATHWAY | mmu05140      | 2.824E-03 | 2.761E-02 | Tgfb2, 21808:down Tnf, 21926:up Ptgs2, 19225:down C3, 12266:up Tgfb3, 21809:down                                                                                                                                   |
| Metabolism of xenobiotics by cytochrome P450                             | KEGG PATHWAY | mmu00980      | 2.824E-03 | 2.761E-02 | Gstm1, 14862:up Cbr2, 12409:up Gstt1, 14871:up Aldh1a3, 56847:down Gsta4, 14860:up                                                                                                                                 |
| Iron uptake and transport                                                | Reactome     | R-MMU-917937  | 2.875E-03 | 2.761E-02 | Slc40a1, 53945:up Hmox1, 15368:up Trf, 22041:up Tfrc, 22042:up                                                                                                                                                     |
| Formation of Fibrin Clot (Clotting Cascade)                              | Reactome     | R-MMU-140877  | 2.875E-03 | 2.761E-02 | Serpine2, 20720:up Kng1, 16644:up Kng2, 385643:up Serpin1, 12258:up                                                                                                                                                |
| Drug metabolism - cytochrome P450                                        | KEGG PATHWAY | mmu00982      | 3.192E-03 | 3.024E-02 | Gstm1, 14862:up Gstt1, 14871:up Maob, 109731:up Gsta4, 14860:up Aldh1a3, 56847:down                                                                                                                                |
| SHC-related events triggered by IGF1R                                    | Reactome     | R-MMU-2428933 | 3.807E-03 | 3.511E-02 | Igf2, 16002:up Igf1, 16000:up                                                                                                                                                                                      |
| Crosslinking of collagen fibrils                                         | Reactome     | R-MMU-2243919 | 3.807E-03 | 3.511E-02 | Col1a2, 12843:down T111, 21892:down                                                                                                                                                                                |
| Rapl signaling pathway                                                   | KEGG PATHWAY | mmu04015      | 3.971E-03 | 3.615E-02 | Fgfr2, 14183:up Fgfr1, 14182:down Igf1, 16000:up Vegfb, 22340:up Kit1, 17311:up Pdgfc, 54635:down Vegfa, 22339:down Egfr, 13649:down Figf, 14205:up                                                                |
| Tuberculosis                                                             | KEGG PATHWAY | mmu05152      | 4.158E-03 | 3.737E-02 | Tgfb2, 21808:down Tnf, 21926:up Mrc1, 17533:up Mrc2, 17534:down Vdr, 22337:down Tgfb3, 21809:down C3, 12266:up Clec4e, 56619:up                                                                                    |
| Signaling pathways regulating pluripotency of stem cells                 | KEGG PATHWAY | mmu04550      | 4.399E-03 | 3.850E-02 | Inhba, 16323:down Fgfr2, 14183:up Fgfr1, 14182:down Igf1, 16000:up Bmpr1a, 12166:down Bmp4, 12159:up Wnt5a, 22418:down                                                                                             |
| Immunoregulatory interactions between a Lymphoid and a non-Lymphoid cell | Reactome     | R-MMU-198933  | 4.449E-03 | 3.850E-02 | H2-T24, 15042:up Cd200, 17470:down Col1a2, 12843:down Clec2d, 93694:up Col3a1, 12825:down C3, 12266:up                                                                                                             |
| Cargo recognition for clathrin-mediated endocytosis                      | Reactome     | R-MMU-8856825 | 4.756E-03 | 4.066E-02 | Cd4, 12504:up Trf, 22041:up Egfr, 13649:down Wnt5a, 22418:down Tfrc, 22042:up                                                                                                                                      |
| HIF-1 signaling pathway                                                  | KEGG PATHWAY | mmu04066      | 4.852E-03 | 4.098E-02 | Hmox1, 15368:up Igf1, 16000:up Trf, 22041:up Vegfa, 22339:down Tfrc, 22042:up Egfr, 13649:down                                                                                                                     |
| Amoebiasis                                                               | KEGG PATHWAY | mmu05146      | 5.282E-03 | 4.306E-02 | Lama2, 16773:down Tnf, 21926:up Col3a1, 12825:down Tgfb3, 21809:down Tgfb2, 21808:down Col1a2, 12843:down                                                                                                          |
| PI3P, PP2A and IER3 Regulate PI3K/AKT Signaling                          | Reactome     | R-MMU-6811558 | 5.861E-03 | 4.722E-02 | Nrg1, 211323:down Kit1, 17311:up Fgfr2, 14183:up Fgfr1, 14182:down Egfr, 13649:down                                                                                                                                |
| Ras signaling pathway                                                    | KEGG PATHWAY | mmu04014      | 6.035E-03 | 4.807E-02 | Fgfr2, 14183:up Fgfr1, 14182:down Igf1, 16000:up Vegfb, 22340:up Kit1, 17311:up Pdgfc, 54635:down Vegfa, 22339:down Egfr, 13649:down Figf, 14205:up                                                                |
| @@Heme degradation                                                       | Reactome     | R-MMU-189483  | 6.408E-03 | 5.047E-02 | Hmox1, 15368:up Blvrb, 233016:up                                                                                                                                                                                   |
| Histidine metabolism                                                     | KEGG PATHWAY | mmu00340      | 6.605E-03 | 5.144E-02 | Maob, 109731:up Aldh1a3, 56847:down Hal, 15109:up                                                                                                                                                                  |
| MicroRNAs in cancer                                                      | KEGG PATHWAY | mmu05206      | 7.164E-03 | 5.519E-02 | Mir199a-2, 723821:down Mirlet7e, 387248:down Mir214, 387210:down Mirlet7c-1, 387246:down Ptgs2, 19225:down Itga5, 16402:down Vegfa, 22339:down Tgfb2, 21808:down Tnc, 21923:down Egfr, 13649:down                  |
| Negative regulation of the PI3K/AKT network                              | Reactome     | R-MMU-199418  | 7.481E-03 | 5.700E-02 | Nrg1, 211323:down Kit1, 17311:up Fgfr2, 14183:up Fgfr1, 14182:down Egfr, 13649:down                                                                                                                                |

|                                                                      |              |               |            |            |                                                                                                                                                                                                                                                                                                                                                                                                                                                                      |
|----------------------------------------------------------------------|--------------|---------------|------------|------------|----------------------------------------------------------------------------------------------------------------------------------------------------------------------------------------------------------------------------------------------------------------------------------------------------------------------------------------------------------------------------------------------------------------------------------------------------------------------|
| PPAR signaling pathway                                               | KEGG PATHWAY | mmu03320      | 8. 208E-03 | 6. 121E-02 | Fabp4, 11770:up Fabp5, 16592:up Adipoq, 11450:up Pparg, 19016:up Lpl, 16956:up                                                                                                                                                                                                                                                                                                                                                                                       |
| Cytokine Signaling in Immune system                                  | Reactome     | R-MMU-1280215 | 9. 816E-03 | 7. 243E-02 | Tnfrsf12a, 27279:down Crlf1, 12931:down Cd4, 12504:up Ret, 19713:up Fgfr2, 14183:up Fgfr1, 14182:down Kit1, 17311:up Tnf, 21926:up Il1rn, 16181:up Il1rl1, 17082:down Nrg1, 211323:down Pr12c2, 18811:up Tnfrsf11b, 18383:up Egfr, 13649:down                                                                                                                                                                                                                        |
| G alpha (q) signalling events                                        | Reactome     | R-MMU-416476  | 1. 011E-02 | 7. 381E-02 | Cc19, 20308:up Cc16, 20305:up Kng1, 16644:up Kng2, 385643:up EdnrB, 13618:up Htr2b, 15559:down Htr2a, 15558:down                                                                                                                                                                                                                                                                                                                                                     |
| Formyl peptide receptors bind formyl peptides and many other ligands | Reactome     | R-MMU-444473  | 1. 143E-02 | 8. 177E-02 | Cc16, 20305:up Cc19, 20308:up                                                                                                                                                                                                                                                                                                                                                                                                                                        |
| Chemical carcinogenesis                                              | KEGG PATHWAY | mmu05204      | 1. 161E-02 | 8. 220E-02 | Gstm1, 14862:up Ptgs2, 19225:down Gstt1, 14871:up Aldh1a3, 56847:down Gsta4, 14860:up                                                                                                                                                                                                                                                                                                                                                                                |
| Herpes simplex infection                                             | KEGG PATHWAY | mmu05168      | 1. 229E-02 | 8. 618E-02 | H2-T24, 15042:up Oas3, 246727:up Ifit1, 15957:up Tnf, 21926:up Cc12, 20296:up Oas1a, 246730:up C3, 12266:up Cc112, 20293:up                                                                                                                                                                                                                                                                                                                                          |
| Signaling by GPCR                                                    | Reactome     | R-MMU-372790  | 1. 277E-02 | 8. 861E-02 | G1pr, 14652:down Ret, 19713:up Prkar2b, 19088:up Kng1, 16644:up Cc12, 20296:up Ppbp, 57349:down Cc13, 20302:up Nrg1, 211323:down Cc117, 20295:down Htr2b, 15559:down Cxc6, 80901:down EdnrB, 13618:up Cxc112, 20315:up Htr2a, 15558:down Kit1, 17311:up Kng2, 385643:up Egfr, 13649:down Cc19, 20308:up Cc16, 20305:up Cc17, 20306:up Fgfr1, 14182:down Adm, 11535:up Cc14, 20303:up Cxc19, 17329:up Ptgir, 19222:up Cx3cr1, 13051:down C3, 12266:up Fgfr2, 14183:up |
| Taurine and hypotaurine metabolism                                   | KEGG PATHWAY | mmu00430      | 1. 339E-02 | 8. 938E-02 | Cdo1, 12583:up Ggt5, 23887:up                                                                                                                                                                                                                                                                                                                                                                                                                                        |
| SHC1 events in ERBB2 signaling                                       | Reactome     | R-MMU-1250196 | 1. 339E-02 | 8. 938E-02 | Nrg1, 211323:down Egfr, 13649:down                                                                                                                                                                                                                                                                                                                                                                                                                                   |
| Serotonin receptors                                                  | Reactome     | R-MMU-390666  | 1. 339E-02 | 8. 938E-02 | Htr2b, 15559:down Htr2a, 15558:down                                                                                                                                                                                                                                                                                                                                                                                                                                  |
| RA biosynthesis pathway                                              | Reactome     | R-MMU-5365859 | 1. 430E-02 | 9. 459E-02 | Akr1c18, 105349:up Aldh1a2, 19378:up Aldh1a3, 56847:down                                                                                                                                                                                                                                                                                                                                                                                                             |
| Renin-angiotensin system                                             | KEGG PATHWAY | mmu04614      | 1. 537E-02 | 9. 552E-02 | Klk1b11, 16613:up Mme, 17380:up Anpep, 16790:up                                                                                                                                                                                                                                                                                                                                                                                                                      |
| Signal regulatory protein (SIRP) family interactions                 | Reactome     | R-MMU-391160  | 1. 548E-02 | 9. 552E-02 | Sirpb1a, 320832:down Sirpb1b, 668101:down                                                                                                                                                                                                                                                                                                                                                                                                                            |
| Signaling by Activin                                                 | Reactome     | R-MMU-1502540 | 1. 548E-02 | 9. 552E-02 | Fstl3, 83554:down Inhba, 16323:down                                                                                                                                                                                                                                                                                                                                                                                                                                  |
| ERBB2 Activates PTK6 Signaling                                       | Reactome     | R-MMU-8847993 | 1. 548E-02 | 9. 552E-02 | Nrg1, 211323:down Egfr, 13649:down                                                                                                                                                                                                                                                                                                                                                                                                                                   |
| Phagosome                                                            | KEGG PATHWAY | mmu04145      | 1. 584E-02 | 9. 552E-02 | H2-T24, 15042:up Thbs2, 21826:down Itga5, 16402:down Tfrc, 22042:up Mrc2, 17534:down C3, 12266:up Mrc1, 17533:up                                                                                                                                                                                                                                                                                                                                                     |
| Central carbon metabolism in cancer                                  | KEGG PATHWAY | mmu05230      | 1. 600E-02 | 9. 552E-02 | Ret, 19713:up Fgfr2, 14183:up Fgfr1, 14182:down Egfr, 13649:down                                                                                                                                                                                                                                                                                                                                                                                                     |
| Pancreatic cancer                                                    | KEGG PATHWAY | mmu05212      | 1. 600E-02 | 9. 552E-02 | Tgfb2, 21808:down Tgfb3, 21809:down Egfr, 13649:down Vegfa, 22339:down                                                                                                                                                                                                                                                                                                                                                                                               |
| PI-3K cascade:FGFR4                                                  | Reactome     | R-MMU-5654720 | 1. 646E-02 | 9. 552E-02 | Nrg1, 211323:down Kit1, 17311:up Fgfr2, 14183:up Fgfr1, 14182:down Egfr, 13649:down                                                                                                                                                                                                                                                                                                                                                                                  |
| PI-3K cascade:FGFR3                                                  | Reactome     | R-MMU-5654710 | 1. 646E-02 | 9. 552E-02 | Nrg1, 211323:down Kit1, 17311:up Fgfr2, 14183:up Fgfr1, 14182:down Egfr, 13649:down                                                                                                                                                                                                                                                                                                                                                                                  |
| PI-3K cascade:FGFR1                                                  | Reactome     | R-MMU-5654689 | 1. 646E-02 | 9. 552E-02 | Nrg1, 211323:down Kit1, 17311:up Fgfr2, 14183:up Fgfr1, 14182:down Egfr, 13649:down                                                                                                                                                                                                                                                                                                                                                                                  |
| PI-3K cascade:FGFR2                                                  | Reactome     | R-MMU-5654695 | 1. 646E-02 | 9. 552E-02 | Nrg1, 211323:down Kit1, 17311:up Fgfr2, 14183:up Fgfr1, 14182:down Egfr, 13649:down                                                                                                                                                                                                                                                                                                                                                                                  |
| PI3K events in ERBB4 signaling                                       | Reactome     | R-MMU-1250342 | 1. 646E-02 | 9. 552E-02 | Nrg1, 211323:down Kit1, 17311:up Fgfr2, 14183:up Fgfr1, 14182:down Egfr, 13649:down                                                                                                                                                                                                                                                                                                                                                                                  |
| PIP3 activates AKT signaling                                         | Reactome     | R-MMU-1257604 | 1. 646E-02 | 9. 552E-02 | Nrg1, 211323:down Kit1, 17311:up Fgfr2, 14183:up Fgfr1, 14182:down Egfr, 13649:down                                                                                                                                                                                                                                                                                                                                                                                  |

|                                                                    |              |               |           |           |                                                                                                                                                                                                                                                             |
|--------------------------------------------------------------------|--------------|---------------|-----------|-----------|-------------------------------------------------------------------------------------------------------------------------------------------------------------------------------------------------------------------------------------------------------------|
| Renal cell carcinoma                                               | KEGG PATHWAY | mmu05211      | 1.677E-02 | 9.639E-02 | Tgfb2, 21808:down Tgfb3, 21809:down Vegfa, 22339:down Epsa1, 13819:up                                                                                                                                                                                       |
| GAB1 signalosome                                                   | Reactome     | R-MMU-180292  | 1.833E-02 | 1.036E-01 | Nrg1, 211323:down Kit1, 17311:up Fgfr2, 14183:up Fgfr1, 14182:down Egfr, 13649:down                                                                                                                                                                         |
| PI3K/AKT activation                                                | Reactome     | R-MMU-198203  | 1.833E-02 | 1.036E-01 | Nrg1, 211323:down Kit1, 17311:up Fgfr2, 14183:up Fgfr1, 14182:down Egfr, 13649:down                                                                                                                                                                         |
| Clathrin-mediated endocytosis                                      | Reactome     | R-MMU-8856828 | 1.966E-02 | 1.101E-01 | Cd4, 12504:up Trf, 22041:up Egfr, 13649:down Wnt5a, 22418:down Tfrc, 22042:up                                                                                                                                                                               |
| Hormone-sensitive lipase (HSL)-mediated triacylglycerol hydrolysis | Reactome     | R-MMU-163560  | 2.004E-02 | 1.101E-01 | Fabp4, 11770:up Fabp5, 16592:up                                                                                                                                                                                                                             |
| ERBB2 Regulates Cell Motility                                      | Reactome     | R-MMU-6785631 | 2.004E-02 | 1.101E-01 | Nrg1, 211323:down Egfr, 13649:down                                                                                                                                                                                                                          |
| Melanoma                                                           | KEGG PATHWAY | mmu05218      | 2.011E-02 | 1.101E-01 | Pdgfc, 54635:down Fgfr1, 14182:down Igf1, 16000:up Egfr, 13649:down                                                                                                                                                                                         |
| Signaling by VEGF                                                  | Reactome     | R-MMU-194138  | 2.070E-02 | 1.125E-01 | Ret, 19713:up Fgfr2, 14183:up Fgfr1, 14182:down Vegfb, 22340:up Kit1, 17311:up Vegfa, 22339:down Nrg1, 211323:down Egfr, 13649:down Figf, 14205:up                                                                                                          |
| TNF signaling pathway                                              | KEGG PATHWAY | mmu04668      | 2.104E-02 | 1.135E-01 | Creb3l1, 26427:down Tnf, 21926:up Ptgs2, 19225:down Cc112, 20293:up Cc12, 20296:up                                                                                                                                                                          |
| Glycosaminoglycan metabolism                                       | Reactome     | R-MMU-1630316 | 2.176E-02 | 1.155E-01 | Chst11, 58250:down Pre1p, 116847:up Hpse, 15442:up Vcan, 13003:down Gpc4, 14735:down                                                                                                                                                                        |
| Role of LAT2/NTAL/LAB on calcium mobilization                      | Reactome     | R-MMU-2730905 | 2.176E-02 | 1.155E-01 | Nrg1, 211323:down Kit1, 17311:up Fgfr2, 14183:up Fgfr1, 14182:down Egfr, 13649:down                                                                                                                                                                         |
| Anchoring fibril formation                                         | Reactome     | R-MMU-2214320 | 2.251E-02 | 1.178E-01 | Colla2, 12843:down T111, 21892:down                                                                                                                                                                                                                         |
| PI3K events in ERBB2 signaling                                     | Reactome     | R-MMU-1963642 | 2.251E-02 | 1.178E-01 | Nrg1, 211323:down Egfr, 13649:down                                                                                                                                                                                                                          |
| Bladder cancer                                                     | KEGG PATHWAY | mmu05219      | 2.272E-02 | 1.180E-01 | Mmp2, 17390:down Egfr, 13649:down Vegfa, 22339:down                                                                                                                                                                                                         |
| Arachidonic acid metabolism                                        | Reactome     | R-MMU-2142753 | 2.383E-02 | 1.228E-01 | Hpgd, 15446:up Ptgs2, 19225:down Akr1c18, 105349:up Ggt5, 23887:up                                                                                                                                                                                          |
| DAP12 interactions                                                 | Reactome     | R-MMU-2172127 | 2.694E-02 | 1.334E-01 | Sirpb1a, 320832:down Prkar2b, 19088:up Ret, 19713:up Fgfr2, 14183:up Fgfr1, 14182:down Sirpb1b, 668101:down Kit1, 17311:up Nrg1, 211323:down Egfr, 13649:down                                                                                               |
| @@Disease                                                          | Reactome     | R-MMU-1643685 | 2.740E-02 | 1.334E-01 | Fgfr2, 14183:up                                                                                                                                                                                                                                             |
| Signaling by FGFR2 IIIa TM                                         | Reactome     | R-MMU-8851708 | 2.740E-02 | 1.334E-01 | Fgfr2, 14183:up                                                                                                                                                                                                                                             |
| FGFR2 mutant receptor activation                                   | Reactome     | R-MMU-1839126 | 2.740E-02 | 1.334E-01 | Fgfr2, 14183:up                                                                                                                                                                                                                                             |
| Signaling by FGFR2 in disease                                      | Reactome     | R-MMU-5655253 | 2.740E-02 | 1.334E-01 | Fgfr2, 14183:up                                                                                                                                                                                                                                             |
| Signaling by FGFR in disease                                       | Reactome     | R-MMU-1226099 | 2.740E-02 | 1.334E-01 | Fgfr2, 14183:up                                                                                                                                                                                                                                             |
| Diseases of signal transduction                                    | Reactome     | R-MMU-5663202 | 2.740E-02 | 1.334E-01 | Fgfr2, 14183:up                                                                                                                                                                                                                                             |
| Innate Immune System                                               | Reactome     | R-MMU-168249  | 2.750E-02 | 1.334E-01 | Sirpb1a, 320832:down Prkar2b, 19088:up S100a1, 20193:up Ret, 19713:up Fgfr2, 14183:up Fgfr1, 14182:down Sirpb1b, 668101:down Kit1, 17311:up C1s2, 317677:up Nrg1, 211323:down C1s1, 50908:up C1rb, 667277:up C3, 12266:up Clec4n, 56620:up Egfr, 13649:down |
| Signaling by Type 1 Insulin-like Growth Factor 1 Receptor (IGF1R)  | Reactome     | R-MMU-2404192 | 2.797E-02 | 1.334E-01 | Kit1, 17311:up Ret, 19713:up Fgfr2, 14183:up Fgfr1, 14182:down Igf2, 16002:up Igf1, 16000:up Nrg1, 211323:down Egfr, 13649:down                                                                                                                             |
| IRS-related events triggered by IGF1R                              | Reactome     | R-MMU-2428928 | 2.797E-02 | 1.334E-01 | Kit1, 17311:up Ret, 19713:up Fgfr2, 14183:up Fgfr1, 14182:down Igf2, 16002:up Igf1, 16000:up Nrg1, 211323:down Egfr, 13649:down                                                                                                                             |
| IGF1R signaling cascade                                            | Reactome     | R-MMU-2428924 | 2.797E-02 | 1.334E-01 | Kit1, 17311:up Ret, 19713:up Fgfr2, 14183:up Fgfr1, 14182:down Igf2, 16002:up Igf1, 16000:up Nrg1, 211323:down Egfr, 13649:down                                                                                                                             |

|                                                                          |              |               |           |           |                                                                                                                                                                      |
|--------------------------------------------------------------------------|--------------|---------------|-----------|-----------|----------------------------------------------------------------------------------------------------------------------------------------------------------------------|
| Chondroitin sulfate/dermatan sulfate metabolism                          | Reactome     | R-MMU-1793185 | 3.007E-02 | 1.403E-01 | Chst11, 58250:down Vcan, 13003:down Gpc4, 14735:down                                                                                                                 |
| Retinoid metabolism and transport                                        | Reactome     | R-MMU-975634  | 3.007E-02 | 1.403E-01 | Akr1c18, 105349:up Lpl, 16956:up Gpc4, 14735:down                                                                                                                    |
| VEGFR2 mediated cell proliferation                                       | Reactome     | R-MMU-5218921 | 3.019E-02 | 1.403E-01 | Ret, 19713:up Fgfr2, 14183:up Fgfr1, 14182:down Kit1, 17311:up Vegfa, 22339:down Nrg1, 211323:down Egfr, 13649:down                                                  |
| Pantothenate and CoA biosynthesis                                        | KEGG PATHWAY | mmu00770      | 3.061E-02 | 1.403E-01 | Enpp3, 209558:down Enpp1, 18605:down                                                                                                                                 |
| Other semaphorin interactions                                            | Reactome     | R-MMU-416700  | 3.061E-02 | 1.403E-01 | Plxnd1, 67784:up Sema7a, 20361:down                                                                                                                                  |
| Metabolism of porphyrins                                                 | Reactome     | R-MMU-189445  | 3.061E-02 | 1.403E-01 | Hmx1, 15368:up Blvrb, 233016:up                                                                                                                                      |
| Activation of Matrix Metalloproteinases                                  | Reactome     | R-MMU-1592389 | 3.167E-02 | 1.432E-01 | Klk1b11, 16613:up Mmp2, 17390:down Mmp13, 17386:up                                                                                                                   |
| Heparan sulfate/heparin (HS-GAG) metabolism                              | Reactome     | R-MMU-1638091 | 3.167E-02 | 1.432E-01 | Hpse, 15442:up Vcan, 13003:down Gpc4, 14735:down                                                                                                                     |
| Signal transduction by L1                                                | Reactome     | R-MMU-445144  | 3.353E-02 | 1.497E-01 | Fgfr1, 14182:down Egfr, 13649:down                                                                                                                                   |
| Chondroitin sulfate biosynthesis                                         | Reactome     | R-MMU-2022870 | 3.353E-02 | 1.497E-01 | Chst11, 58250:down Vcan, 13003:down                                                                                                                                  |
| Signaling by Interleukins                                                | Reactome     | R-MMU-449147  | 3.468E-02 | 1.539E-01 | Crlf1, 12931:down Cd4, 12504:up Ret, 19713:up Fgfr2, 14183:up Fgfr1, 14182:down Kit1, 17311:up Il1rn, 16181:up Il1r11, 17082:down Nrg1, 211323:down Egfr, 13649:down |
| Transcriptional regulation of white adipocyte differentiation            | Reactome     | R-MMU-381340  | 3.500E-02 | 1.543E-01 | Tnf, 21926:up Pparg, 19016:up Fabp4, 11770:up                                                                                                                        |
| Gap junction                                                             | KEGG PATHWAY | mmu04540      | 3.608E-02 | 1.580E-01 | Pdgfc, 54635:down Htr2b, 15559:down Htr2a, 15558:down Egfr, 13649:down                                                                                               |
| HS-GAG degradation                                                       | Reactome     | R-MMU-2024096 | 3.655E-02 | 1.580E-01 | Hpse, 15442:up Gpc4, 14735:down                                                                                                                                      |
| Synthesis of Prostaglandins (PG) and Thromboxanes (TX)                   | Reactome     | R-MMU-2162123 | 3.655E-02 | 1.580E-01 | Ptgs2, 19225:down Akr1c18, 105349:up                                                                                                                                 |
| Arginine and proline metabolism                                          | KEGG PATHWAY | mmu00330      | 3.674E-02 | 1.580E-01 | P4ha1, 18451:down Gatm, 67092:down Maob, 109731:up                                                                                                                   |
| RET signaling                                                            | Reactome     | R-MMU-8853659 | 3.721E-02 | 1.590E-01 | Dok2, 13449:up Ret, 19713:up Fgfr2, 14183:up Fgfr1, 14182:down Kit1, 17311:up Nrg1, 211323:down Egfr, 13649:down                                                     |
| Staphylococcus aureus infection                                          | KEGG PATHWAY | mmu05150      | 3.851E-02 | 1.636E-01 | C1s1, 50908:up C1s2, 317677:up C3, 12266:up                                                                                                                          |
| Fructose biosynthesis                                                    | Reactome     | R-MMU-5652227 | 4.082E-02 | 1.654E-01 | Sord, 20322:up                                                                                                                                                       |
| Biogenic amines are oxidatively deaminated to aldehydes by MAOA and MAOB | Reactome     | R-MMU-141333  | 4.082E-02 | 1.654E-01 | Maob, 109731:up                                                                                                                                                      |
| TP53 Regulates Transcription of Death Receptors and Ligands              | Reactome     | R-MMU-6803211 | 4.082E-02 | 1.654E-01 | Igfbp3, 16009:up                                                                                                                                                     |
| Transcriptional misregulation in cancer                                  | KEGG PATHWAY | mmu05202      | 4.191E-02 | 1.688E-01 | Hpgd, 15446:up Pparg, 19016:up Plat, 18791:down Igf1, 16000:up Ly11, 17095:up Igfbp3, 16009:up                                                                       |
| Metabolism of fat-soluble vitamins                                       | Reactome     | R-MMU-6806667 | 4.219E-02 | 1.690E-01 | Akr1c18, 105349:up Lpl, 16956:up Gpc4, 14735:down                                                                                                                    |



|                                                                             |              |               |            |            |                                                                                                                                                                                                                             |
|-----------------------------------------------------------------------------|--------------|---------------|------------|------------|-----------------------------------------------------------------------------------------------------------------------------------------------------------------------------------------------------------------------------|
| Downstream signaling of activated FGFR1                                     | Reactome     | R-MMU-5654687 | 4. 351E-02 | 1. 733E-01 | Prkar2b, 19088:up Ret, 19713:up Fgfr2, 14183:up Fgfr1, 14182:down Kit1, 17311:up Flrt2, 399558:down Nrg1, 211323:down Egfr, 13649:down                                                                                      |
| FoxO signaling pathway                                                      | KEGG PATHWAY | mmu04068      | 4. 386E-02 | 1. 737E-01 | Tgfb2, 21808:down Tgfb3, 21809:down Igf1, 16000:up Egfr, 13649:down Plk2, 20620:down                                                                                                                                        |
| Endocrine and other factor-regulated calcium reabsorption                   | KEGG PATHWAY | mmu04961      | 4. 410E-02 | 1. 737E-01 | Vdr, 22337:down Klk1b11, 16613:up Fxyd2, 11936:up                                                                                                                                                                           |
| Semaphorin interactions                                                     | Reactome     | R-MMU-373755  | 4. 604E-02 | 1. 790E-01 | Plxnd1, 67784:up Sema7a, 20361:down Dpys13, 22240:down                                                                                                                                                                      |
| Hepatitis C                                                                 | KEGG PATHWAY | mmu05160      | 4. 615E-02 | 1. 790E-01 | Oas1a, 246730:up Tnf, 21926:up Oas3, 246727:up Ifit1, 15957:up Egfr, 13649:down                                                                                                                                             |
| Phenylalanine metabolism                                                    | KEGG PATHWAY | mmu00360      | 4. 621E-02 | 1. 790E-01 | Maob, 109731:up Aldh1a3, 56847:down                                                                                                                                                                                         |
| Signaling by FGFR1                                                          | Reactome     | R-MMU-5654736 | 4. 734E-02 | 1. 823E-01 | Prkar2b, 19088:up Ret, 19713:up Fgfr2, 14183:up Fgfr1, 14182:down Kit1, 17311:up Flrt2, 399558:down Nrg1, 211323:down Egfr, 13649:down                                                                                      |
| Longevity regulating pathway                                                | KEGG PATHWAY | mmu04211      | 4. 837E-02 | 1. 853E-01 | Creb311, 26427:down Igf1, 16000:up Adipoq, 11450:up Pparg, 19016:up                                                                                                                                                         |
| A tetrasaccharide linker sequence is required for GAG synthesis             | Reactome     | R-MMU-1971475 | 4. 962E-02 | 1. 890E-01 | Vcan, 13003:down Gpc4, 14735:down                                                                                                                                                                                           |
| NOD-like receptor signaling pathway                                         | KEGG PATHWAY | mmu04621      | 5. 213E-02 | 1. 919E-01 | Cc12, 20296:up Tnf, 21926:up Cc112, 20293:up                                                                                                                                                                                |
| Adaptive Immune System                                                      | Reactome     | R-MMU-1280218 | 5. 232E-02 | 1. 919E-01 | Sec23a, 20334:down H2-T24, 15042:up Cd200, 17470:down Fgfr2, 14183:up Fgfr1, 14182:down Kit1, 17311:up Clec2d, 93694:up Colla2, 12843:down Nrg1, 211323:down Col3a1, 12825:down C3, 12266:up Cd4, 12504:up Egfr, 13649:down |
| NF-kappa B signaling pathway                                                | KEGG PATHWAY | mmu04064      | 5. 291E-02 | 1. 919E-01 | Tnf, 21926:up Ptgs2, 19225:down Cxc112, 20315:up Cc14, 20303:up                                                                                                                                                             |
| Oxygen-dependent asparagine hydroxylation of Hypoxia-inducible Factor Alpha | Reactome     | R-MMU-1234162 | 5. 405E-02 | 1. 919E-01 | Epas1, 13819:up                                                                                                                                                                                                             |
| WNT5A-dependent internalization of FZD2, FZD5 and ROR2                      | Reactome     | R-MMU-5140745 | 5. 405E-02 | 1. 919E-01 | Wnt5a, 22418:down                                                                                                                                                                                                           |
| Vitamins B6 activation to pyridoxal phosphate                               | Reactome     | R-MMU-964975  | 5. 405E-02 | 1. 919E-01 | Pdxk, 216134:up                                                                                                                                                                                                             |
| Alternative complement activation                                           | Reactome     | R-MMU-173736  | 5. 405E-02 | 1. 919E-01 | C3, 12266:up                                                                                                                                                                                                                |
| FGFR1c and Klotho ligand binding and activation                             | Reactome     | R-MMU-190374  | 5. 405E-02 | 1. 919E-01 | Fgfr1, 14182:down                                                                                                                                                                                                           |
| Inflammatory bowel disease (IBD)                                            | KEGG PATHWAY | mmu05321      | 5. 425E-02 | 1. 919E-01 | Tgfb2, 21808:down Tnf, 21926:up Tgfb3, 21809:down                                                                                                                                                                           |
| Melanogenesis                                                               | KEGG PATHWAY | mmu04916      | 5. 448E-02 | 1. 919E-01 | Kit1, 17311:up Creb311, 26427:down Ednrb, 13618:up Wnt5a, 22418:down                                                                                                                                                        |
| Metabolism of vitamins and cofactors                                        | Reactome     | R-MMU-196854  | 5. 598E-02 | 1. 962E-01 | Ptgs2, 19225:down Pdxk, 216134:up Akr1c18, 105349:up Lpl, 16956:up Gpc4, 14735:down                                                                                                                                         |
| Toll-like receptor signaling pathway                                        | KEGG PATHWAY | mmu04620      | 5. 769E-02 | 2. 012E-01 | Tnf, 21926:up Cc14, 20303:up Cc13, 20302:up Cxc19, 17329:up                                                                                                                                                                 |
| L1CAM interactions                                                          | Reactome     | R-MMU-373760  | 5. 859E-02 | 2. 024E-01 | Fgfr1, 14182:down Cd24a, 12484:down Egfr, 13649:down                                                                                                                                                                        |
| Wnt signaling pathway                                                       | KEGG PATHWAY | mmu04310      | 5. 861E-02 | 2. 024E-01 | Sfrp4, 20379:up Sfrp2, 20319:up Sfrp1, 20377:up Wnt5a, 22418:down Gpc4, 14735:down                                                                                                                                          |

|                                                       |              |               |           |           |                                                                                                                                        |
|-------------------------------------------------------|--------------|---------------|-----------|-----------|----------------------------------------------------------------------------------------------------------------------------------------|
| Signaling by EGFR                                     | Reactome     | R-MMU-177929  | 5.922E-02 | 2.035E-01 | Prkar2b, 19088:up Ret, 19713:up Fgfr2, 14183:up Fgfr1, 14182:down Kit1, 17311:up Adam12, 11489:down Nrg1, 211323:down Egfr, 13649:down |
| Transferrin endocytosis and recycling                 | Reactome     | R-MMU-917977  | 6.035E-02 | 2.054E-01 | Trf, 22041:up Tfrc, 22042:up                                                                                                           |
| TRP channels                                          | Reactome     | R-MMU-3295583 | 6.035E-02 | 2.054E-01 | Mcoln3, 171166:up Mcoln2, 68279:up                                                                                                     |
| Signaling by ERBB4                                    | Reactome     | R-MMU-1236394 | 6.484E-02 | 2.081E-01 | Cxcl12, 20315:up Ret, 19713:up Fgfr2, 14183:up Fgfr1, 14182:down Kit1, 17311:up Nrg1, 211323:down Prl2c2, 18811:up Egfr, 13649:down    |
| GRB2 events in EGFR signaling                         | Reactome     | R-MMU-179812  | 6.547E-02 | 2.081E-01 | Ret, 19713:up Fgfr2, 14183:up Fgfr1, 14182:down Kit1, 17311:up Nrg1, 211323:down Egfr, 13649:down                                      |
| Signalling to p38 via RIT and RIN                     | Reactome     | R-MMU-187706  | 6.547E-02 | 2.081E-01 | Ret, 19713:up Fgfr2, 14183:up Fgfr1, 14182:down Kit1, 17311:up Nrg1, 211323:down Egfr, 13649:down                                      |
| SHC1 events in ERBB4 signaling                        | Reactome     | R-MMU-1250347 | 6.547E-02 | 2.081E-01 | Ret, 19713:up Fgfr2, 14183:up Fgfr1, 14182:down Kit1, 17311:up Nrg1, 211323:down Egfr, 13649:down                                      |
| SOS-mediated signalling                               | Reactome     | R-MMU-112412  | 6.547E-02 | 2.081E-01 | Ret, 19713:up Fgfr2, 14183:up Fgfr1, 14182:down Kit1, 17311:up Nrg1, 211323:down Egfr, 13649:down                                      |
| RAF/MAP kinase cascade                                | Reactome     | R-MMU-5673001 | 6.547E-02 | 2.081E-01 | Ret, 19713:up Fgfr2, 14183:up Fgfr1, 14182:down Kit1, 17311:up Nrg1, 211323:down Egfr, 13649:down                                      |
| SHC1 events in EGFR signaling                         | Reactome     | R-MMU-180336  | 6.547E-02 | 2.081E-01 | Ret, 19713:up Fgfr2, 14183:up Fgfr1, 14182:down Kit1, 17311:up Nrg1, 211323:down Egfr, 13649:down                                      |
| FRS-mediated FGFR2 signaling                          | Reactome     | R-MMU-5654700 | 6.669E-02 | 2.081E-01 | Ret, 19713:up Fgfr2, 14183:up Fgfr1, 14182:down Kit1, 17311:up Nrg1, 211323:down Egfr, 13649:down                                      |
| FRS-mediated FGFR4 signaling                          | Reactome     | R-MMU-5654712 | 6.669E-02 | 2.081E-01 | Ret, 19713:up Fgfr2, 14183:up Fgfr1, 14182:down Kit1, 17311:up Nrg1, 211323:down Egfr, 13649:down                                      |
| FRS-mediated FGFR3 signaling                          | Reactome     | R-MMU-5654706 | 6.669E-02 | 2.081E-01 | Ret, 19713:up Fgfr2, 14183:up Fgfr1, 14182:down Kit1, 17311:up Nrg1, 211323:down Egfr, 13649:down                                      |
| FRS-mediated FGFR1 signaling                          | Reactome     | R-MMU-5654693 | 6.669E-02 | 2.081E-01 | Ret, 19713:up Fgfr2, 14183:up Fgfr1, 14182:down Kit1, 17311:up Nrg1, 211323:down Egfr, 13649:down                                      |
| Riboflavin metabolism                                 | KEGG PATHWAY | mmu00740      | 6.711E-02 | 2.081E-01 | Blvrb, 233016:up                                                                                                                       |
| Amine Oxidase reactions                               | Reactome     | R-MMU-140179  | 6.711E-02 | 2.081E-01 | Maob, 109731:up                                                                                                                        |
| Prostacyclin signalling through prostacyclin receptor | Reactome     | R-MMU-392851  | 6.711E-02 | 2.081E-01 | Ptgir, 19222:up                                                                                                                        |
| Fibronectin matrix formation                          | Reactome     | R-MMU-1566977 | 6.711E-02 | 2.081E-01 | Ceacam1, 26365:up                                                                                                                      |
| Dectin-2 family                                       | Reactome     | R-MMU-5621480 | 6.711E-02 | 2.081E-01 | Clec4n, 56620:up                                                                                                                       |
| Thyroid cancer                                        | KEGG PATHWAY | mmu05216      | 6.790E-02 | 2.097E-01 | Ret, 19713:up Pparg, 19016:up                                                                                                          |
| Hippo signaling pathway                               | KEGG PATHWAY | mmu04390      | 6.984E-02 | 2.147E-01 | Tgfb2, 21808:down Tgfb3, 21809:down Bmpr1a, 12166:down Bmp4, 12159:up Wnt5a, 22418:down                                                |
| Frs2-mediated activation                              | Reactome     | R-MMU-170968  | 7.171E-02 | 2.160E-01 | Ret, 19713:up Fgfr2, 14183:up Fgfr1, 14182:down Kit1, 17311:up Nrg1, 211323:down Egfr, 13649:down                                      |
| MAPK1/MAPK3 signaling                                 | Reactome     | R-MMU-5684996 | 7.171E-02 | 2.160E-01 | Ret, 19713:up Fgfr2, 14183:up Fgfr1, 14182:down Kit1, 17311:up Nrg1, 211323:down Egfr, 13649:down                                      |
| Signalling to RAS                                     | Reactome     | R-MMU-167044  | 7.171E-02 | 2.160E-01 | Ret, 19713:up Fgfr2, 14183:up Fgfr1, 14182:down Kit1, 17311:up Nrg1, 211323:down Egfr, 13649:down                                      |
| ARMS-mediated activation                              | Reactome     | R-MMU-170984  | 7.171E-02 | 2.160E-01 | Ret, 19713:up Fgfr2, 14183:up Fgfr1, 14182:down Kit1, 17311:up Nrg1, 211323:down Egfr, 13649:down                                      |
| EGFR interacts with phospholipase C-gamma             | Reactome     | R-MMU-212718  | 7.179E-02 | 2.160E-01 | Prkar2b, 19088:up Egfr, 13649:down                                                                                                     |
| Peptide hormone metabolism                            | Reactome     | R-MMU-2980736 | 7.256E-02 | 2.172E-01 | Igf1, 16000:up Inhba, 16323:down Mme, 17380:up                                                                                         |
| @@Signaling by FGFR                                   | Reactome     | R-MMU-190236  | 7.283E-02 | 2.172E-01 | Prkar2b, 19088:up Ret, 19713:up Fgfr2, 14183:up Fgfr1, 14182:down Kit1, 17311:up Flrt2, 399558:down Nrg1, 211323:down Egfr, 13649:down |
| Signaling by Leptin                                   | Reactome     | R-MMU-2586552 | 7.431E-02 | 2.207E-01 | Ret, 19713:up Fgfr2, 14183:up Fgfr1, 14182:down Kit1, 17311:up Nrg1, 211323:down Egfr, 13649:down                                      |

|                                                          |              |               |           |           |                                                                                                                                                                                                                      |
|----------------------------------------------------------|--------------|---------------|-----------|-----------|----------------------------------------------------------------------------------------------------------------------------------------------------------------------------------------------------------------------|
| Transmembrane transport of small molecules               | Reactome     | R-MMU-382551  | 7.500E-02 | 2.218E-01 | Hmx1, 15368:up Ank, 11732:down Fxyd2, 11936:up Prkar2b, 19088:up Fxyd1, 56188:up Emb, 13723:up Trf, 22041:up Mcoln2, 68279:up Tfrc, 22042:up Slc40a1, 53945:up Mcoln3, 171166:up Slc29a1, 63959:up Slc2a6, 227659:up |
| Prolonged ERK activation events                          | Reactome     | R-MMU-169893  | 7.562E-02 | 2.218E-01 | Ret, 19713:up Fgfr2, 14183:up Fgfr1, 14182:down Kit1, 17311:up Nrg1, 211323:down Egfr, 13649:down                                                                                                                    |
| Interleukin receptor SHC signaling                       | Reactome     | R-MMU-912526  | 7.562E-02 | 2.218E-01 | Ret, 19713:up Fgfr2, 14183:up Fgfr1, 14182:down Kit1, 17311:up Nrg1, 211323:down Egfr, 13649:down                                                                                                                    |
| Toxoplasmosis                                            | KEGG PATHWAY | mmu05145      | 7.897E-02 | 2.270E-01 | Tgfb2, 21808:down Tnf, 21926:up Lama2, 16773:down Tgfb3, 21809:down                                                                                                                                                  |
| Catabolism of glucuronate to xylulose-5-phosphate        | Reactome     | R-MMU-5661270 | 7.998E-02 | 2.270E-01 | Sord, 20322:up                                                                                                                                                                                                       |
| Activation of C3 and C5                                  | Reactome     | R-MMU-174577  | 7.998E-02 | 2.270E-01 | C3, 12266:up                                                                                                                                                                                                         |
| GRB7 events in ERBB2 signaling                           | Reactome     | R-MMU-1306955 | 7.998E-02 | 2.270E-01 | Nrg1, 211323:down                                                                                                                                                                                                    |
| Synthesis of Lipoxins (LX)                               | Reactome     | R-MMU-2142700 | 7.998E-02 | 2.270E-01 | Hpgd, 15446:up                                                                                                                                                                                                       |
| Synthesis of 15-eicosatetraenoic acid derivatives        | Reactome     | R-MMU-2142770 | 7.998E-02 | 2.270E-01 | Ptgs2, 19225:down                                                                                                                                                                                                    |
| Signalling to ERKs                                       | Reactome     | R-MMU-187687  | 8.240E-02 | 2.329E-01 | Ret, 19713:up Fgfr2, 14183:up Fgfr1, 14182:down Kit1, 17311:up Nrg1, 211323:down Egfr, 13649:down                                                                                                                    |
| Interleukin-2 signaling                                  | Reactome     | R-MMU-451927  | 8.520E-02 | 2.389E-01 | Ret, 19713:up Fgfr2, 14183:up Fgfr1, 14182:down Kit1, 17311:up Nrg1, 211323:down Egfr, 13649:down                                                                                                                    |
| Regulation of actin cytoskeleton                         | KEGG PATHWAY | mmu04810      | 8.950E-02 | 2.432E-01 | Itga11, 319480:down Fgfr2, 14183:up Fgfr1, 14182:down Pdgfc, 54635:down Itga5, 16402:down Egfr, 13649:down                                                                                                           |
| Arrhythmogenic right ventricular cardiomyopathy (ARVC)   | KEGG PATHWAY | mmu05412      | 9.054E-02 | 2.432E-01 | Itga11, 319480:down Lama2, 16773:down Itga5, 16402:down                                                                                                                                                              |
| Interleukin-3, 5 and GM-CSF signaling                    | Reactome     | R-MMU-512988  | 9.096E-02 | 2.432E-01 | Ret, 19713:up Fgfr2, 14183:up Fgfr1, 14182:down Kit1, 17311:up Nrg1, 211323:down Egfr, 13649:down                                                                                                                    |
| Nicotinate and nicotinamide metabolism                   | KEGG PATHWAY | mmu00760      | 9.222E-02 | 2.432E-01 | Enpp3, 209558:down Enpp1, 18605:down                                                                                                                                                                                 |
| Amine ligand-binding receptors                           | Reactome     | R-MMU-375280  | 9.222E-02 | 2.432E-01 | Htr2b, 15559:down Htr2a, 15558:down                                                                                                                                                                                  |
| Signaling by ERBB2                                       | Reactome     | R-MMU-1227986 | 9.222E-02 | 2.432E-01 | Nrg1, 211323:down Egfr, 13649:down                                                                                                                                                                                   |
| AMPK inhibits chREBP transcriptional activation activity | Reactome     | R-MMU-163680  | 9.267E-02 | 2.432E-01 | Adipoq, 11450:up                                                                                                                                                                                                     |
| Proton-coupled monocarboxylate transport                 | Reactome     | R-MMU-433692  | 9.267E-02 | 2.432E-01 | Emb, 13723:up                                                                                                                                                                                                        |
| PTK6 promotes HIF1A stabilization                        | Reactome     | R-MMU-8857538 | 9.267E-02 | 2.432E-01 | Egfr, 13649:down                                                                                                                                                                                                     |
| FGFR1b ligand binding and activation                     | Reactome     | R-MMU-190370  | 9.267E-02 | 2.432E-01 | Fgfr1, 14182:down                                                                                                                                                                                                    |
| TNFR1-mediated ceramide production                       | Reactome     | R-MMU-5626978 | 9.267E-02 | 2.432E-01 | Tnf, 21926:up                                                                                                                                                                                                        |
| Downstream signaling of activated FGFR4                  | Reactome     | R-MMU-5654716 | 9.296E-02 | 2.432E-01 | Prkar2b, 19088:up Ret, 19713:up Fgfr2, 14183:up Fgfr1, 14182:down Kit1, 17311:up Nrg1, 211323:down Egfr, 13649:down                                                                                                  |
| Downstream signaling of activated FGFR2                  | Reactome     | R-MMU-5654696 | 9.296E-02 | 2.432E-01 | Prkar2b, 19088:up Ret, 19713:up Fgfr2, 14183:up Fgfr1, 14182:down Kit1, 17311:up Nrg1, 211323:down Egfr, 13649:down                                                                                                  |

|                                                           |              |               |           |           |                                                                                                                     |
|-----------------------------------------------------------|--------------|---------------|-----------|-----------|---------------------------------------------------------------------------------------------------------------------|
| Downstream signaling of activated FGFR3                   | Reactome     | R-MMU-5654708 | 9.296E-02 | 2.432E-01 | Prkar2b, 19088:up Ret, 19713:up Fgfr2, 14183:up Fgfr1, 14182:down Kit1, 17311:up Nrg1, 211323:down Egfr, 13649:down |
| Downstream signaling events of B Cell Receptor (BCR)      | Reactome     | R-MMU-1168372 | 9.384E-02 | 2.445E-01 | Nrg1, 211323:down Kit1, 17311:up Fgfr2, 14183:up Fgfr1, 14182:down Egfr, 13649:down                                 |
| FCERI mediated MAPK activation                            | Reactome     | R-MMU-2871796 | 9.542E-02 | 2.472E-01 | Ret, 19713:up Fgfr2, 14183:up Fgfr1, 14182:down Kit1, 17311:up Nrg1, 211323:down Egfr, 13649:down                   |
| Influenza A                                               | KEGG PATHWAY | mmu05164      | 9.557E-02 | 2.472E-01 | Oas1a, 246730:up Tnf, 21926:up Cc12, 20296:up Oas3, 246727:up Cc112, 20293:up                                       |
| Signaling by FGFR4                                        | Reactome     | R-MMU-5654743 | 9.697E-02 | 2.499E-01 | Prkar2b, 19088:up Ret, 19713:up Fgfr2, 14183:up Fgfr1, 14182:down Kit1, 17311:up Nrg1, 211323:down Egfr, 13649:down |
| VEGFA-VEGFR2 Pathway                                      | Reactome     | R-MMU-4420097 | 9.832E-02 | 2.515E-01 | Ret, 19713:up Fgfr2, 14183:up Fgfr1, 14182:down Kit1, 17311:up Vegfa, 22339:down Nrg1, 211323:down Egfr, 13649:down |
| Signaling by FGFR3                                        | Reactome     | R-MMU-5654741 | 9.832E-02 | 2.515E-01 | Prkar2b, 19088:up Ret, 19713:up Fgfr2, 14183:up Fgfr1, 14182:down Kit1, 17311:up Nrg1, 211323:down Egfr, 13649:down |
| Platinum drug resistance                                  | KEGG PATHWAY | mmu01524      | 1.016E-01 | 2.587E-01 | Gstm1, 14862:up Gstt1, 14871:up Gsta4, 14860:up                                                                     |
| MAPK family signaling cascades                            | Reactome     | R-MMU-5683057 | 1.047E-01 | 2.587E-01 | Ret, 19713:up Fgfr2, 14183:up Fgfr1, 14182:down Kit1, 17311:up Nrg1, 211323:down Egfr, 13649:down                   |
| Glycerophospholipid catabolism                            | Reactome     | R-MMU-6814848 | 1.052E-01 | 2.587E-01 | Gdpd1, 66569:up                                                                                                     |
| Regulation of gene expression by Hypoxia-inducible Factor | Reactome     | R-MMU-1234158 | 1.052E-01 | 2.587E-01 | Epas1, 13819:up                                                                                                     |
| Histidine catabolism                                      | Reactome     | R-MMU-70921   | 1.052E-01 | 2.587E-01 | Hal1, 15109:up                                                                                                      |
| Creatine metabolism                                       | Reactome     | R-MMU-71288   | 1.052E-01 | 2.587E-01 | Gatm, 67092:down                                                                                                    |
| Degradation of cysteine and homocysteine                  | Reactome     | R-MMU-1614558 | 1.052E-01 | 2.587E-01 | Cdo1, 12583:up                                                                                                      |
| Nicotinamide salvaging                                    | Reactome     | R-MMU-197264  | 1.052E-01 | 2.587E-01 | Ptgs2, 19225:down                                                                                                   |
| Fructose metabolism                                       | Reactome     | R-MMU-5652084 | 1.052E-01 | 2.587E-01 | Sord, 20322:up                                                                                                      |
| Downstream signal transduction                            | Reactome     | R-MMU-186763  | 1.095E-01 | 2.677E-01 | Prkar2b, 19088:up Ret, 19713:up Fgfr2, 14183:up Fgfr1, 14182:down Kit1, 17311:up Nrg1, 211323:down Egfr, 13649:down |
| Tyrosine metabolism                                       | KEGG PATHWAY | mmu00350      | 1.096E-01 | 2.677E-01 | Maob, 109731:up Aldh1a3, 56847:down                                                                                 |
| Endocytosis                                               | KEGG PATHWAY | mmu04144      | 1.110E-01 | 2.702E-01 | H2-T24, 15042:up Ret, 19713:up Fgfr2, 14183:up Tfrc, 22042:up Tgfb2, 21808:down Tgfb3, 21809:down Egfr, 13649:down  |
| AMPK signaling pathway                                    | KEGG PATHWAY | mmu04152      | 1.125E-01 | 2.729E-01 | Creb311, 26427:down Igf1, 16000:up Adipoq, 11450:up Pparg, 19016:up                                                 |
| Glycine, serine and threonine metabolism                  | KEGG PATHWAY | mmu00260      | 1.141E-01 | 2.748E-01 | Gatm, 67092:down Maob, 109731:up                                                                                    |
| Aldosterone-regulated sodium reabsorption                 | KEGG PATHWAY | mmu04960      | 1.141E-01 | 2.748E-01 | Fxyd2, 11936:up Igf1, 16000:up                                                                                      |
| DAP12 signaling                                           | Reactome     | R-MMU-2424491 | 1.169E-01 | 2.762E-01 | Prkar2b, 19088:up Ret, 19713:up Fgfr2, 14183:up Fgfr1, 14182:down Kit1, 17311:up Nrg1, 211323:down Egfr, 13649:down |
| TNFR1-induced proapoptotic signaling                      | Reactome     | R-MMU-5357786 | 1.175E-01 | 2.762E-01 | Tnf, 21926:up                                                                                                       |

|                                                                                          |              |               |            |            |                                                                                                                                                                                                                                                                                                                                                                                                                                                                                                        |
|------------------------------------------------------------------------------------------|--------------|---------------|------------|------------|--------------------------------------------------------------------------------------------------------------------------------------------------------------------------------------------------------------------------------------------------------------------------------------------------------------------------------------------------------------------------------------------------------------------------------------------------------------------------------------------------------|
| Transport of nucleosides and free purine and pyrimidine bases across the plasma membrane | Reactome     | R-MMU-83936   | 1. 175E-01 | 2. 762E-01 | Slc29a1, 63959:up                                                                                                                                                                                                                                                                                                                                                                                                                                                                                      |
| FGFR2b ligand binding and activation                                                     | Reactome     | R-MMU-190377  | 1. 175E-01 | 2. 762E-01 | Fgfr2, 14183:up                                                                                                                                                                                                                                                                                                                                                                                                                                                                                        |
| Negative regulation of TCF-dependent signaling by WNT ligand antagonists                 | Reactome     | R-MMU-3772470 | 1. 175E-01 | 2. 762E-01 | Wnt5a, 22418:down                                                                                                                                                                                                                                                                                                                                                                                                                                                                                      |
| Synthesis of UDP-N-acetyl-glucosamine                                                    | Reactome     | R-MMU-446210  | 1. 175E-01 | 2. 762E-01 | Gfpt2, 14584:down                                                                                                                                                                                                                                                                                                                                                                                                                                                                                      |
| Porphyrin and chlorophyll metabolism                                                     | KEGG PATHWAY | mmu00860      | 1. 186E-01 | 2. 762E-01 | Hmx1, 15368:up Blvrb, 233016:up                                                                                                                                                                                                                                                                                                                                                                                                                                                                        |
| Antigen Presentation: Folding, assembly and peptide loading of class I MHC               | Reactome     | R-MMU-983170  | 1. 186E-01 | 2. 762E-01 | Sec23a, 20334:down H2-T24, 15042:up                                                                                                                                                                                                                                                                                                                                                                                                                                                                    |
| Serotonergic synapse                                                                     | KEGG PATHWAY | mmu04726      | 1. 194E-01 | 2. 772E-01 | Ptgs2, 19225:down Htr2b, 15559:down Htr2a, 15558:down Maob, 109731:up                                                                                                                                                                                                                                                                                                                                                                                                                                  |
| Metabolism                                                                               | Reactome     | R-MMU-1430728 | 1. 203E-01 | 2. 782E-01 | G1plr, 14652:down Prkar2b, 19088:up Mt1, 17748:up Ha1, 15109:up Cdo1, 12583:up Maob, 109731:up Hmx1, 15368:up Blvrb, 233016:up Gpc4, 14735:down Pre1p, 116847:up Vcan, 13003:down Ddah1, 69219:down Gdpd1, 66569:up Hpgd, 15446:up Gatm, 67092:down Hpse, 15442:up Fabp5, 16592:up Chst11, 58250:down Lp1, 16956:up Uck2, 80914:down Mt2, 17750:up Plpp3, 67916:up Pdxk, 216134:up Sord, 20322:up Adipoq, 11450:up Ptgs2, 19225:down Ampd3, 11717:up Ggt5, 23887:up Fabp4, 11770:up Akr1c18, 105349:up |
| Insulin secretion                                                                        | KEGG PATHWAY | mmu04911      | 1. 221E-01 | 2. 815E-01 | Creb311, 26427:down Fxyd2, 11936:up G1plr, 14652:down                                                                                                                                                                                                                                                                                                                                                                                                                                                  |
| Phospholipase C-mediated cascade: FGFR1                                                  | Reactome     | R-MMU-5654219 | 1. 278E-01 | 2. 887E-01 | Fgfr1, 14182:down Prkar2b, 19088:up                                                                                                                                                                                                                                                                                                                                                                                                                                                                    |
| @@Vitamin B6 metabolism                                                                  | KEGG PATHWAY | mmu00750      | 1. 297E-01 | 2. 887E-01 | Pdxk, 216134:up                                                                                                                                                                                                                                                                                                                                                                                                                                                                                        |
| Glycoprotein hormones                                                                    | Reactome     | R-MMU-209822  | 1. 297E-01 | 2. 887E-01 | Inhba, 16323:down                                                                                                                                                                                                                                                                                                                                                                                                                                                                                      |
| Downregulation of ERBB2:ERBB3 signaling                                                  | Reactome     | R-MMU-1358803 | 1. 297E-01 | 2. 887E-01 | Nrg1, 211323:down                                                                                                                                                                                                                                                                                                                                                                                                                                                                                      |
| Dissolution of Fibrin Clot                                                               | Reactome     | R-MMU-75205   | 1. 297E-01 | 2. 887E-01 | Plat, 18791:down                                                                                                                                                                                                                                                                                                                                                                                                                                                                                       |
| Reactions specific to the complex N-glycan synthesis pathway                             | Reactome     | R-MMU-975578  | 1. 297E-01 | 2. 887E-01 | Man2a2, 140481:up                                                                                                                                                                                                                                                                                                                                                                                                                                                                                      |
| Prostanoid ligand receptors                                                              | Reactome     | R-MMU-391908  | 1. 297E-01 | 2. 887E-01 | Ptgir, 19222:up                                                                                                                                                                                                                                                                                                                                                                                                                                                                                        |
| EGFR Transactivation by Gastrin                                                          | Reactome     | R-MMU-2179392 | 1. 297E-01 | 2. 887E-01 | Egfr, 13649:down                                                                                                                                                                                                                                                                                                                                                                                                                                                                                       |
| Lipid digestion, mobilization, and transport                                             | Reactome     | R-MMU-73923   | 1. 313E-01 | 2. 903E-01 | Fabp4, 11770:up Fabp5, 16592:up Lp1, 16956:up                                                                                                                                                                                                                                                                                                                                                                                                                                                          |
| Visual phototransduction                                                                 | Reactome     | R-MMU-2187338 | 1. 313E-01 | 2. 903E-01 | Akr1c18, 105349:up Lp1, 16956:up Gpc4, 14735:down                                                                                                                                                                                                                                                                                                                                                                                                                                                      |
| @@Arachidonic acid metabolism                                                            | KEGG PATHWAY | mmu00590      | 1. 344E-01 | 2. 962E-01 | Ptgs2, 19225:down Cbr2, 12409:up Ggt5, 23887:up                                                                                                                                                                                                                                                                                                                                                                                                                                                        |

|                                                                                                     |              |               |           |           |                                                                                                                     |
|-----------------------------------------------------------------------------------------------------|--------------|---------------|-----------|-----------|---------------------------------------------------------------------------------------------------------------------|
| Signaling by the B Cell Receptor (BCR)                                                              | Reactome     | R-MMU-983705  | 1.356E-01 | 2.979E-01 | Nrg1, 211323:down Kit1, 17311:up Fgfr2, 14183:up Fgfr1, 14182:down Egfr, 13649:down                                 |
| Phospholipase C-mediated cascade; FGFR2                                                             | Reactome     | R-MMU-5654221 | 1.371E-01 | 2.985E-01 | Fgfr2, 14183:up Prkar2b, 19088:up                                                                                   |
| Ton transport by P-type ATPases                                                                     | Reactome     | R-MMU-936837  | 1.371E-01 | 2.985E-01 | Fxyd2, 11936:up Fxyd1, 56188:up                                                                                     |
| @@Signaling by FGFR2                                                                                | Reactome     | R-MMU-5654738 | 1.371E-01 | 2.985E-01 | Prkar2b, 19088:up Ret, 19713:up Fgfr2, 14183:up Fgfr1, 14182:down Kit1, 17311:up Nrg1, 211323:down Egfr, 13649:down |
| Antigen processing and presentation                                                                 | KEGG PATHWAY | mmu04612      | 1.375E-01 | 2.985E-01 | Tnf, 21926:up Cd4, 12504:up H2-T24, 15042:up                                                                        |
| IRS-mediated signalling                                                                             | Reactome     | R-MMU-112399  | 1.387E-01 | 2.993E-01 | Ret, 19713:up Fgfr2, 14183:up Fgfr1, 14182:down Kit1, 17311:up Nrg1, 211323:down Egfr, 13649:down                   |
| NGF signalling via TRKA from the plasma membrane                                                    | Reactome     | R-MMU-187037  | 1.388E-01 | 2.993E-01 | Prkar2b, 19088:up Ret, 19713:up Fgfr2, 14183:up Fgfr1, 14182:down Kit1, 17311:up Nrg1, 211323:down Egfr, 13649:down |
| Calcitonin-like ligand receptors                                                                    | Reactome     | R-MMU-419812  | 1.417E-01 | 3.020E-01 | Adm, 11535:up                                                                                                       |
| Dermatan sulfate biosynthesis                                                                       | Reactome     | R-MMU-2022923 | 1.417E-01 | 3.020E-01 | Vcan, 13003:down                                                                                                    |
| Sperm Motility And Taxes                                                                            | Reactome     | R-MMU-1300642 | 1.417E-01 | 3.020E-01 | Hvcn1, 74096:up                                                                                                     |
| Pyrimidine salvage reactions                                                                        | Reactome     | R-MMU-73614   | 1.417E-01 | 3.020E-01 | Uck2, 80914:down                                                                                                    |
| TNFR2 non-canonical NF-kB pathway                                                                   | Reactome     | R-MMU-5668541 | 1.439E-01 | 3.039E-01 | Tnfrsf12a, 27279:down Tnf, 21926:up Tnfrsf11b, 18383:up                                                             |
| Transport of glucose and other sugars, bile salts and organic acids, metal ions and amine compounds | Reactome     | R-MMU-425366  | 1.439E-01 | 3.039E-01 | Slc40a1, 53945:up Emb, 13723:up Slc2a6, 227659:up                                                                   |
| Insulin receptor signalling cascade                                                                 | Reactome     | R-MMU-74751   | 1.461E-01 | 3.075E-01 | Ret, 19713:up Fgfr2, 14183:up Fgfr1, 14182:down Kit1, 17311:up Nrg1, 211323:down Egfr, 13649:down                   |
| MAPK signaling pathway                                                                              | KEGG PATHWAY | mmu04010      | 1.480E-01 | 3.086E-01 | Fgfr2, 14183:up Fgfr1, 14182:down Tnf, 21926:up Tgfb2, 21808:down Tgfb3, 21809:down Egfr, 13649:down                |
| Phospholipase D signaling pathway                                                                   | KEGG PATHWAY | mmu04072      | 1.487E-01 | 3.086E-01 | Kit1, 17311:up Pdgfc, 54635:down Plpp3, 67916:up Egfr, 13649:down                                                   |
| Systemic lupus erythematosus                                                                        | KEGG PATHWAY | mmu05322      | 1.513E-01 | 3.086E-01 | Tnf, 21926:up C1s2, 317677:up C3, 12266:up C1s1, 50908:up                                                           |
| Hepatitis B                                                                                         | KEGG PATHWAY | mmu05161      | 1.513E-01 | 3.086E-01 | Creb311, 26427:down Tnf, 21926:up Tgfb2, 21808:down Tgfb3, 21809:down                                               |
| Cocaine addiction                                                                                   | KEGG PATHWAY | mmu05030      | 1.514E-01 | 3.086E-01 | Creb311, 26427:down Maob, 109731:up                                                                                 |
| Transcriptional Regulation of Adipocyte Differentiation in 3T3-L1 Pre-adipocytes                    | Reactome     | R-MMU-442533  | 1.514E-01 | 3.086E-01 | Tnf, 21926:up Fabp4, 11770:up                                                                                       |
| Metabolism of carbohydrates                                                                         | Reactome     | R-MMU-71387   | 1.517E-01 | 3.086E-01 | Sord, 20322:up Hpse, 15442:up Gpc4, 14735:down Chst11, 58250:down Vcan, 13003:down Pre1p, 116847:up                 |
| FGFR1c ligand binding and activation                                                                | Reactome     | R-MMU-190373  | 1.536E-01 | 3.086E-01 | Fgfr1, 14182:down                                                                                                   |
| CS/DS degradation                                                                                   | Reactome     | R-MMU-2024101 | 1.536E-01 | 3.086E-01 | Vcan, 13003:down                                                                                                    |

|                                                                                                          |              |               |           |           |                                                           |
|----------------------------------------------------------------------------------------------------------|--------------|---------------|-----------|-----------|-----------------------------------------------------------|
| Transport of gamma-carboxylated protein precursors from the endoplasmic reticulum to the Golgi apparatus | Reactome     | R-MMU-159763  | 1.536E-01 | 3.086E-01 | Gas6, 14456:up                                            |
| Keratan sulfate degradation                                                                              | Reactome     | R-MMU-2022857 | 1.536E-01 | 3.086E-01 | Pre1p, 116847:up                                          |
| Peptide hormone biosynthesis                                                                             | Reactome     | R-MMU-209952  | 1.536E-01 | 3.086E-01 | Inhba, 16323:down                                         |
| Platelet Adhesion to exposed collagen                                                                    | Reactome     | R-MMU-75892   | 1.536E-01 | 3.086E-01 | Colla2, 12843:down                                        |
| Endocrine resistance                                                                                     | KEGG PATHWAY | mmu01522      | 1.536E-01 | 3.086E-01 | Mmp2, 17390:down   Igf1, 16000:up   Egfr, 13649:down      |
| Amino sugar and nucleotide sugar metabolism                                                              | KEGG PATHWAY | mmu00520      | 1.562E-01 | 3.129E-01 | Gfpt2, 14584:down   Np1, 74091:up                         |
| Estrogen signaling pathway                                                                               | KEGG PATHWAY | mmu04915      | 1.602E-01 | 3.198E-01 | Creb311, 26427:down   Mmp2, 17390:down   Egfr, 13649:down |
| Type II diabetes mellitus                                                                                | KEGG PATHWAY | mmu04930      | 1.611E-01 | 3.198E-01 | Tnf, 21926:up   Adipoq, 11450:up                          |
| Nuclear Receptor transcription pathway                                                                   | Reactome     | R-MMU-383280  | 1.611E-01 | 3.198E-01 | Vdr, 22337:down   Pparg, 19016:up                         |
| Integration of energy metabolism                                                                         | Reactome     | R-MMU-163685  | 1.636E-01 | 3.200E-01 | Adipoq, 11450:up   Glp1r, 14652:down   Prkar2b, 19088:up  |
| TP53 Regulates Transcription of Cell Death Genes                                                         | Reactome     | R-MMU-5633008 | 1.653E-01 | 3.200E-01 | Igfbp3, 16009:up                                          |
| Translocation of ZAP-70 to Immunological synapse                                                         | Reactome     | R-MMU-202430  | 1.653E-01 | 3.200E-01 | Cd4, 12504:up                                             |
| eNOS activation                                                                                          | Reactome     | R-MMU-203615  | 1.653E-01 | 3.200E-01 | Ddah1, 69219:down                                         |
| Facilitative Na <sup>+</sup> -independent glucose transporters                                           | Reactome     | R-MMU-428790  | 1.653E-01 | 3.200E-01 | Slc2a6, 227659:up                                         |
| Metabolism of Angiotensinogen to Angiotensins                                                            | Reactome     | R-MMU-2022377 | 1.653E-01 | 3.200E-01 | Mme, 17380:up                                             |
| Removal of aminoterminal propeptides from gamma-carboxylated proteins                                    | Reactome     | R-MMU-159782  | 1.653E-01 | 3.200E-01 | Gas6, 14456:up                                            |
| GRB2 events in ERBB2 signaling                                                                           | Reactome     | R-MMU-1963640 | 1.653E-01 | 3.200E-01 | Nrg1, 211323:down                                         |
| Formation of Senescence-Associated Heterochromatin Foci (SAHF)                                           | Reactome     | R-MMU-2559584 | 1.653E-01 | 3.200E-01 | Hmgal-rs1, 111241:up                                      |
| Ion homeostasis                                                                                          | Reactome     | R-MMU-5578775 | 1.659E-01 | 3.204E-01 | Fxyd2, 11936:up   Fxyd1, 56188:up                         |
| Class B/2 (Secretin family receptors)                                                                    | Reactome     | R-MMU-373080  | 1.708E-01 | 3.290E-01 | Glp1r, 14652:down   Adm, 11535:up                         |
| Choline metabolism in cancer                                                                             | KEGG PATHWAY | mmu05231      | 1.737E-01 | 3.331E-01 | Pdgfc, 54635:down   Plpp3, 67916:up   Egfr, 13649:down    |
| Nuclear signaling by ERBB4                                                                               | Reactome     | R-MMU-1251985 | 1.758E-01 | 3.331E-01 | Pr12c2, 18811:up   Cxc112, 20315:up                       |

|                                                                         |              |               |           |           |                                                                                                                                                                                                                                                                                                                                                                             |
|-------------------------------------------------------------------------|--------------|---------------|-----------|-----------|-----------------------------------------------------------------------------------------------------------------------------------------------------------------------------------------------------------------------------------------------------------------------------------------------------------------------------------------------------------------------------|
| Folate biosynthesis                                                     | KEGG PATHWAY | mmu00790      | 1.768E-01 | 3.331E-01 | Alpl, 11647:up                                                                                                                                                                                                                                                                                                                                                              |
| Nicotinate metabolism                                                   | Reactome     | R-MMU-196807  | 1.768E-01 | 3.331E-01 | Ptgs2, 19225:down                                                                                                                                                                                                                                                                                                                                                           |
| FGFR2c ligand binding and activation                                    | Reactome     | R-MMU-190375  | 1.768E-01 | 3.331E-01 | Fgfr2, 14183:up                                                                                                                                                                                                                                                                                                                                                             |
| LGI-ADAM interactions                                                   | Reactome     | R-MMU-5682910 | 1.768E-01 | 3.331E-01 | Lgi2, 246316:up                                                                                                                                                                                                                                                                                                                                                             |
| Gamma-carboxylation, transport, and amino-terminal cleavage of proteins | Reactome     | R-MMU-159854  | 1.768E-01 | 3.331E-01 | Gas6, 14456:up                                                                                                                                                                                                                                                                                                                                                              |
| Starch and sucrose metabolism                                           | KEGG PATHWAY | mmu00500      | 1.807E-01 | 3.396E-01 | Enpp3, 209558:down Enpp1, 18605:down                                                                                                                                                                                                                                                                                                                                        |
| Basal cell carcinoma                                                    | KEGG PATHWAY | mmu05217      | 1.857E-01 | 3.453E-01 | Bmp4, 12159:up Wnt5a, 22418:down                                                                                                                                                                                                                                                                                                                                            |
| Signaling by SCF-KIT                                                    | Reactome     | R-MMU-1433557 | 1.875E-01 | 3.453E-01 | Ret, 19713:up Fgfr2, 14183:up Fgfr1, 14182:down Kitl, 17311:up Nrg1, 211323:down Egfr, 13649:down                                                                                                                                                                                                                                                                           |
| Downregulation of TGF-beta receptor signaling                           | Reactome     | R-MMU-2173788 | 1.881E-01 | 3.453E-01 | Pmepa1, 65112:down                                                                                                                                                                                                                                                                                                                                                          |
| Eicosanoid ligand-binding receptors                                     | Reactome     | R-MMU-391903  | 1.881E-01 | 3.453E-01 | Ptgir, 19222:up                                                                                                                                                                                                                                                                                                                                                             |
| Regulation of FZD by ubiquitination                                     | Reactome     | R-MMU-4641263 | 1.881E-01 | 3.453E-01 | Rspo2, 239405:up                                                                                                                                                                                                                                                                                                                                                            |
| Phosphorylation of CD3 and TCR zeta chains                              | Reactome     | R-MMU-202427  | 1.881E-01 | 3.453E-01 | Cd4, 12504:up                                                                                                                                                                                                                                                                                                                                                               |
| Purine salvage                                                          | Reactome     | R-MMU-74217   | 1.881E-01 | 3.453E-01 | Ampd3, 11717:up                                                                                                                                                                                                                                                                                                                                                             |
| Synthesis of Leukotrienes (LT) and Eoxins (EX)                          | Reactome     | R-MMU-2142691 | 1.881E-01 | 3.453E-01 | Ggt5, 23887:up                                                                                                                                                                                                                                                                                                                                                              |
| Miscellaneous transport and binding events                              | Reactome     | R-MMU-5223345 | 1.881E-01 | 3.453E-01 | Ank, 11732:down                                                                                                                                                                                                                                                                                                                                                             |
| Signaling by PTK6                                                       | Reactome     | R-MMU-8848021 | 1.907E-01 | 3.490E-01 | Nrg1, 211323:down Egfr, 13649:down                                                                                                                                                                                                                                                                                                                                          |
| Metabolic pathways                                                      | KEGG PATHWAY | mmu01100      | 1.923E-01 | 3.510E-01 | Maob, 109731:up P4ha1, 18451:down Gatm, 67092:down Enpp1, 18605:down Hal, 15109:up Cdo1, 12583:up Aldh1a3, 56847:down Cbr2, 12409:up Man2a2, 140481:up Alpl, 11647:up Hpse, 15442:up Aldh1a2, 19378:up Uck2, 80914:down Gfpt2, 14584:down Plpp3, 67916:up Pdxk, 216134:up Sord, 20322:up Enpp3, 209558:down Anep, 16790:up Ptgs2, 19225:down Ampd3, 11717:up Ggt5, 23887:up |
| Signaling by Insulin receptor                                           | Reactome     | R-MMU-74752   | 1.937E-01 | 3.528E-01 | Ret, 19713:up Fgfr2, 14183:up Fgfr1, 14182:down Kitl, 17311:up Nrg1, 211323:down Egfr, 13649:down                                                                                                                                                                                                                                                                           |
| Regulation of lipolysis in adipocytes                                   | KEGG PATHWAY | mmu04923      | 1.957E-01 | 3.553E-01 | Fabp4, 11770:up Ptgs2, 19225:down                                                                                                                                                                                                                                                                                                                                           |
| Regulation of KIT signaling                                             | Reactome     | R-MMU-1433559 | 1.993E-01 | 3.556E-01 | Kitl, 17311:up                                                                                                                                                                                                                                                                                                                                                              |
| Syndecan interactions                                                   | Reactome     | R-MMU-3000170 | 1.993E-01 | 3.556E-01 | Tnc, 21923:down                                                                                                                                                                                                                                                                                                                                                             |
| WNT5A-dependent internalization of FZD4                                 | Reactome     | R-MMU-5099900 | 1.993E-01 | 3.556E-01 | Wnt5a, 22418:down                                                                                                                                                                                                                                                                                                                                                           |
| PKA activation                                                          | Reactome     | R-MMU-163615  | 1.993E-01 | 3.556E-01 | Prkar2b, 19088:up                                                                                                                                                                                                                                                                                                                                                           |
| FGFR1 ligand binding and activation                                     | Reactome     | R-MMU-190242  | 1.993E-01 | 3.556E-01 | Fgfr1, 14182:down                                                                                                                                                                                                                                                                                                                                                           |



|                                                                                                                  |              |               |           |           |                                                                   |
|------------------------------------------------------------------------------------------------------------------|--------------|---------------|-----------|-----------|-------------------------------------------------------------------|
| PKA-mediated phosphorylation of CREB                                                                             | Reactome     | R-MMU-111931  | 1.993E-01 | 3.556E-01 | Prkar2b, 19088:up                                                 |
| Legionellosis                                                                                                    | KEGG PATHWAY | mmu05134      | 2.007E-01 | 3.562E-01 | Tnf, 21926:up C3, 12266:up                                        |
| Ovarian steroidogenesis                                                                                          | KEGG PATHWAY | mmu04913      | 2.007E-01 | 3.562E-01 | Ptgs2, 19225:down Igf1, 16000:up                                  |
| Glycerolipid metabolism                                                                                          | KEGG PATHWAY | mmu00561      | 2.057E-01 | 3.623E-01 | Plpp3, 67916:up Lpl, 16956:up                                     |
| Synthesis of substrates in N-glycan biosynthesis                                                                 | Reactome     | R-MMU-446219  | 2.057E-01 | 3.623E-01 | Gfpt2, 14584:down Npl, 74091:up                                   |
| Insulin resistance                                                                                               | KEGG PATHWAY | mmu04931      | 2.086E-01 | 3.639E-01 | Creb311, 26427:down Gfpt2, 14584:down Tnf, 21926:up               |
| G alpha (s) signalling events                                                                                    | Reactome     | R-MMU-418555  | 2.086E-01 | 3.639E-01 | Gplr1, 14652:down Ptgir, 19222:up Adm, 11535:up                   |
| Scavenging of heme from plasma                                                                                   | Reactome     | R-MMU-2168880 | 2.104E-01 | 3.639E-01 | Hp, 15439:up                                                      |
| PD-1 signaling                                                                                                   | Reactome     | R-MMU-389948  | 2.104E-01 | 3.639E-01 | Cd4, 12504:up                                                     |
| Oxygen-dependent proline hydroxylation of Hypoxia-inducible Factor Alpha                                         | Reactome     | R-MMU-1234176 | 2.104E-01 | 3.639E-01 | Epas1, 13819:up                                                   |
| PKA activation in glucagon signalling                                                                            | Reactome     | R-MMU-164378  | 2.104E-01 | 3.639E-01 | Prkar2b, 19088:up                                                 |
| CRMPs in Sema3A signaling                                                                                        | Reactome     | R-MMU-399956  | 2.104E-01 | 3.639E-01 | Dpysl3, 22240:down                                                |
| VEGF signaling pathway                                                                                           | KEGG PATHWAY | mmu04370      | 2.108E-01 | 3.639E-01 | Ptgs2, 19225:down Vegfa, 22339:down                               |
| Cell adhesion molecules (CAMs)                                                                                   | KEGG PATHWAY | mmu04514      | 2.143E-01 | 3.690E-01 | Ncam1, 17967:down Cd4, 12504:up Vcan, 13003:down H2-T24, 15042:up |
| Allograft rejection                                                                                              | KEGG PATHWAY | mmu05330      | 2.209E-01 | 3.747E-01 | Tnf, 21926:up H2-T24, 15042:up                                    |
| TP53 regulates transcription of additional cell cycle genes whose exact role in the p53 pathway remain uncertain | Reactome     | R-MMU-6804115 | 2.213E-01 | 3.747E-01 | Plk2, 20620:down                                                  |
| TNF receptor superfamily (TNFSF) members mediating non-canonical NF-kB pathway                                   | Reactome     | R-MMU-5676594 | 2.213E-01 | 3.747E-01 | Tnfrsf12a, 27279:down                                             |
| Synthesis of bile acids and bile salts via 24-hydroxycholesterol                                                 | Reactome     | R-MMU-193775  | 2.213E-01 | 3.747E-01 | Akr1c18, 105349:up                                                |
| Synthesis of bile acids and bile salts via 27-hydroxycholesterol                                                 | Reactome     | R-MMU-193807  | 2.213E-01 | 3.747E-01 | Akr1c18, 105349:up                                                |
| Colorectal cancer                                                                                                | KEGG PATHWAY | mmu05210      | 2.311E-01 | 3.846E-01 | Tgfb2, 21808:down Tgfb3, 21809:down                               |
| Graft-versus-host disease                                                                                        | KEGG PATHWAY | mmu05332      | 2.311E-01 | 3.846E-01 | Tnf, 21926:up H2-T24, 15042:up                                    |
| FGFR2 ligand binding and activation                                                                              | Reactome     | R-MMU-190241  | 2.321E-01 | 3.846E-01 | Fgfr2, 14183:up                                                   |

|                                                                                                                       |              |               |            |            |                                                                                                                                                                                                                                                                          |
|-----------------------------------------------------------------------------------------------------------------------|--------------|---------------|------------|------------|--------------------------------------------------------------------------------------------------------------------------------------------------------------------------------------------------------------------------------------------------------------------------|
| Synthesis, secretion, and deacylation of Ghrelin                                                                      | Reactome     | R-MMU-422085  | 2. 321E-01 | 3. 846E-01 | Igf1, 16000:up                                                                                                                                                                                                                                                           |
| DARPP-32 events                                                                                                       | Reactome     | R-MMU-180024  | 2. 321E-01 | 3. 846E-01 | Prkar2b, 19088:up                                                                                                                                                                                                                                                        |
| Tie2 Signaling                                                                                                        | Reactome     | R-MMU-210993  | 2. 321E-01 | 3. 846E-01 | Dok2, 13449:up                                                                                                                                                                                                                                                           |
| Glioma                                                                                                                | KEGG PATHWAY | mmu05214      | 2. 362E-01 | 3. 898E-01 | Igf1, 16000:up Egfr, 13649:down                                                                                                                                                                                                                                          |
| Metabolism of proteins                                                                                                | Reactome     | R-MMU-392499  | 2. 363E-01 | 3. 898E-01 | Sec23a, 20334:down Inhba, 16323:down Pappa, 18491:down Igfbp4, 16010:up Man2a2, 140481:up Lmcd1, 30937:up Np1, 74091:up Igf2, 16002:up Gas6, 14456:up Igf1, 16000:up Uchl5, 56207:up Mmp2, 17390:down Klk1b11, 16613:up Gfpt2, 14584:down Mme, 17380:up Igfbp3, 16009:up |
| Regulation of TLR by endogenous ligand                                                                                | Reactome     | R-MMU-5686938 | 2. 427E-01 | 3. 984E-01 | S100a1, 20193:up                                                                                                                                                                                                                                                         |
| Amphetamine addiction                                                                                                 | KEGG PATHWAY | mmu05031      | 2. 464E-01 | 4. 026E-01 | Creb311, 26427:down Maob, 109731:up                                                                                                                                                                                                                                      |
| RNA polymerase II transcribes snRNA genes                                                                             | Reactome     | R-MMU-6807505 | 2. 464E-01 | 4. 026E-01 | Ice1, 218333:down Nabp1, 109019:down                                                                                                                                                                                                                                     |
| Calcium signaling pathway                                                                                             | KEGG PATHWAY | mmu04020      | 2. 496E-01 | 4. 060E-01 | Ednrb, 13618:up Htr2b, 15559:down Htr2a, 15558:down Egfr, 13649:down                                                                                                                                                                                                     |
| Fc epsilon receptor (FCERI) signaling                                                                                 | Reactome     | R-MMU-2454202 | 2. 510E-01 | 4. 060E-01 | Ret, 19713:up Fgfr2, 14183:up Fgfr1, 14182:down Kit1, 17311:up Nrg1, 211323:down Egfr, 13649:down                                                                                                                                                                        |
| p53 signaling pathway                                                                                                 | KEGG PATHWAY | mmu04115      | 2. 515E-01 | 4. 060E-01 | Igf1, 16000:up Igfbp3, 16009:up                                                                                                                                                                                                                                          |
| Platelet activation                                                                                                   | KEGG PATHWAY | mmu04611      | 2. 522E-01 | 4. 060E-01 | Col3a1, 12825:down Ptgir, 19222:up Colla2, 12843:down                                                                                                                                                                                                                    |
| Glycosaminoglycan biosynthesis - chondroitin sulfate / dermatan sulfate                                               | KEGG PATHWAY | mmu00532      | 2. 531E-01 | 4. 060E-01 | Chst11, 58250:down                                                                                                                                                                                                                                                       |
| EGFR downregulation                                                                                                   | Reactome     | R-MMU-182971  | 2. 531E-01 | 4. 060E-01 | Egfr, 13649:down                                                                                                                                                                                                                                                         |
| SHC-mediated cascade:FGFR1                                                                                            | Reactome     | R-MMU-5654688 | 2. 531E-01 | 4. 060E-01 | Fgfr1, 14182:down                                                                                                                                                                                                                                                        |
| Type I diabetes mellitus                                                                                              | KEGG PATHWAY | mmu04940      | 2. 566E-01 | 4. 098E-01 | Tnf, 21926:up H2-T24, 15042:up                                                                                                                                                                                                                                           |
| Biosynthesis of the N-glycan precursor (dolichol lipid-linked oligosaccharide, LLO) and transfer to a nascent protein | Reactome     | R-MMU-446193  | 2. 566E-01 | 4. 098E-01 | Gfpt2, 14584:down Np1, 74091:up                                                                                                                                                                                                                                          |
| Ion channel transport                                                                                                 | Reactome     | R-MMU-983712  | 2. 616E-01 | 4. 122E-01 | Fxyd2, 11936:up Mcoln3, 171166:up Mcoln2, 68279:up Fxyd1, 56188:up                                                                                                                                                                                                       |
| Thyroid hormone synthesis                                                                                             | KEGG PATHWAY | mmu04918      | 2. 617E-01 | 4. 122E-01 | Creb311, 26427:down Fxyd2, 11936:up                                                                                                                                                                                                                                      |
| Inflammatory mediator regulation of TRP channels                                                                      | KEGG PATHWAY | mmu04750      | 2. 634E-01 | 4. 122E-01 | Igf1, 16000:up Htr2b, 15559:down Htr2a, 15558:down                                                                                                                                                                                                                       |
| Glycosaminoglycan degradation                                                                                         | KEGG PATHWAY | mmu00531      | 2. 634E-01 | 4. 122E-01 | Hpse, 15442:up                                                                                                                                                                                                                                                           |
| Sulfur amino acid metabolism                                                                                          | Reactome     | R-MMU-1614635 | 2. 634E-01 | 4. 122E-01 | Cdo1, 12583:up                                                                                                                                                                                                                                                           |
| Regulation of Hypoxia-inducible Factor (HIF) by oxygen                                                                | Reactome     | R-MMU-1234174 | 2. 634E-01 | 4. 122E-01 | Epas1, 13819:up                                                                                                                                                                                                                                                          |

|                                                        |              |               |           |           |                                                                                                                     |
|--------------------------------------------------------|--------------|---------------|-----------|-----------|---------------------------------------------------------------------------------------------------------------------|
| IL-6-type cytokine receptor ligand interactions        | Reactome     | R-MMU-6788467 | 2.634E-01 | 4.122E-01 | Cr1f1, 12931:down                                                                                                   |
| Cellular response to hypoxia                           | Reactome     | R-MMU-2262749 | 2.634E-01 | 4.122E-01 | Epas1, 13819:up                                                                                                     |
| TGF-beta receptor signaling activates SMADs            | Reactome     | R-MMU-2173789 | 2.634E-01 | 4.122E-01 | Pmepa1, 65112:down                                                                                                  |
| Adipocytokine signaling pathway                        | KEGG PATHWAY | mmu04920      | 2.720E-01 | 4.197E-01 | Tnf, 21926:up Adipoq, 11450:up                                                                                      |
| Proximal tubule bicarbonate reclamation                | KEGG PATHWAY | mmu04964      | 2.736E-01 | 4.197E-01 | Fxyd2, 11936:up                                                                                                     |
| Chylomicron-mediated lipid transport                   | Reactome     | R-MMU-174800  | 2.736E-01 | 4.197E-01 | Lpl, 16956:up                                                                                                       |
| Surfactant metabolism                                  | Reactome     | R-MMU-5683826 | 2.736E-01 | 4.197E-01 | Lmcd1, 30937:up                                                                                                     |
| eNOS activation and regulation                         | Reactome     | R-MMU-203765  | 2.736E-01 | 4.197E-01 | Ddah1, 69219:down                                                                                                   |
| TNFs bind their physiological receptors                | Reactome     | R-MMU-5669034 | 2.736E-01 | 4.197E-01 | Tnfrsf11b, 18383:up                                                                                                 |
| Metabolism of nitric oxide                             | Reactome     | R-MMU-202131  | 2.736E-01 | 4.197E-01 | Ddah1, 69219:down                                                                                                   |
| Common Pathway of Fibrin Clot Formation                | Reactome     | R-MMU-140875  | 2.736E-01 | 4.197E-01 | Serpine2, 20720:up                                                                                                  |
| Chronic myeloid leukemia                               | KEGG PATHWAY | mmu05220      | 2.771E-01 | 4.241E-01 | Tgfb2, 21808:down Tgfb3, 21809:down                                                                                 |
| Adherens junction                                      | KEGG PATHWAY | mmu04520      | 2.822E-01 | 4.257E-01 | Fgfr1, 14182:down Egfr, 13649:down                                                                                  |
| EPH-Ephrin signaling                                   | Reactome     | R-MMU-2682334 | 2.822E-01 | 4.257E-01 | Mmp2, 17390:down Vegfa, 22339:down                                                                                  |
| Fertilization                                          | Reactome     | R-MMU-1187000 | 2.836E-01 | 4.257E-01 | Hvcn1, 74096:up                                                                                                     |
| Regulation of Complement cascade                       | Reactome     | R-MMU-977606  | 2.836E-01 | 4.257E-01 | C3, 12266:up                                                                                                        |
| Reproduction                                           | Reactome     | R-MMU-1474165 | 2.836E-01 | 4.257E-01 | Hvcn1, 74096:up                                                                                                     |
| TNFR1-induced NFkappaB signaling pathway               | Reactome     | R-MMU-5357956 | 2.836E-01 | 4.257E-01 | Tnf, 21926:up                                                                                                       |
| Metal ion SLC transporters                             | Reactome     | R-MMU-425410  | 2.836E-01 | 4.257E-01 | Slc40a1, 53945:up                                                                                                   |
| Signaling by BMP                                       | Reactome     | R-MMU-201451  | 2.836E-01 | 4.257E-01 | Bmpr1a, 12166:down                                                                                                  |
| @@Pyrimidine metabolism                                | Reactome     | R-MMU-73848   | 2.935E-01 | 4.359E-01 | Uck2, 80914:down                                                                                                    |
| Asthma                                                 | KEGG PATHWAY | mmu05310      | 2.935E-01 | 4.359E-01 | Tnf, 21926:up                                                                                                       |
| Myogenesis                                             | Reactome     | R-MMU-525793  | 2.935E-01 | 4.359E-01 | Cdo1, 12583:up                                                                                                      |
| CDO in myogenesis                                      | Reactome     | R-MMU-375170  | 2.935E-01 | 4.359E-01 | Cdo1, 12583:up                                                                                                      |
| PI3K Cascade                                           | Reactome     | R-MMU-109704  | 2.975E-01 | 4.409E-01 | Fgfr2, 14183:up Fgfr1, 14182:down                                                                                   |
| Signalling by NGF                                      | Reactome     | R-MMU-166520  | 2.982E-01 | 4.410E-01 | Prkar2b, 19088:up Ret, 19713:up Fgfr2, 14183:up Fgfr1, 14182:down Kit1, 17311:up Nrg1, 211323:down Egfr, 13649:down |
| Salmonella infection                                   | KEGG PATHWAY | mmu05132      | 3.026E-01 | 4.438E-01 | Cc13, 20302:up Cc14, 20303:up                                                                                       |
| N-glycan antennae elongation in the medial/trans-Golgi | Reactome     | R-MMU-975576  | 3.033E-01 | 4.438E-01 | Man2a2, 140481:up                                                                                                   |

|                                                                      |              |               |            |            |                                                                                                                                   |
|----------------------------------------------------------------------|--------------|---------------|------------|------------|-----------------------------------------------------------------------------------------------------------------------------------|
| HS-GAG biosynthesis                                                  | Reactome     | R-MMU-2022928 | 3. 033E-01 | 4. 438E-01 | Gpc4, 14735:down                                                                                                                  |
| SHC-mediated cascade:FGFR2                                           | Reactome     | R-MMU-5654699 | 3. 033E-01 | 4. 438E-01 | Fgfr2, 14183:up                                                                                                                   |
| Keratan sulfate biosynthesis                                         | Reactome     | R-MMU-2022854 | 3. 033E-01 | 4. 438E-01 | Pre1p, 116847:up                                                                                                                  |
| cAMP signaling pathway                                               | KEGG PATHWAY | mmu04024      | 3. 046E-01 | 4. 448E-01 | Creb311, 26427:down Fxyd2, 11936:up G1plr, 14652:down Fxyd1, 56188:up                                                             |
| Dorso-ventral axis formation                                         | KEGG PATHWAY | mmu04320      | 3. 129E-01 | 4. 467E-01 | Egfr, 13649:down                                                                                                                  |
| G protein gated Potassium channels                                   | Reactome     | R-MMU-1296059 | 3. 129E-01 | 4. 467E-01 | Kcnj15, 16516:down                                                                                                                |
| Inhibition of voltage gated Ca2+ channels via Gbeta/gamma subunits   | Reactome     | R-MMU-997272  | 3. 129E-01 | 4. 467E-01 | Kcnj15, 16516:down                                                                                                                |
| Synthesis of bile acids and bile salts via 7alpha-hydroxycholesterol | Reactome     | R-MMU-193368  | 3. 129E-01 | 4. 467E-01 | Akr1c18, 105349:up                                                                                                                |
| Generation of second messenger molecules                             | Reactome     | R-MMU-202433  | 3. 129E-01 | 4. 467E-01 | Cd4, 12504:up                                                                                                                     |
| Regulation of TNFR1 signaling                                        | Reactome     | R-MMU-5357905 | 3. 129E-01 | 4. 467E-01 | Tnf, 21926:up                                                                                                                     |
| Calmodulin induced events                                            | Reactome     | R-MMU-111933  | 3. 129E-01 | 4. 467E-01 | Prkar2b, 19088:up                                                                                                                 |
| WNT ligand biogenesis and trafficking                                | Reactome     | R-MMU-3238698 | 3. 129E-01 | 4. 467E-01 | Wnt5a, 22418:down                                                                                                                 |
| CaM pathway                                                          | Reactome     | R-MMU-111997  | 3. 129E-01 | 4. 467E-01 | Prkar2b, 19088:up                                                                                                                 |
| Laminin interactions                                                 | Reactome     | R-MMU-3000157 | 3. 129E-01 | 4. 467E-01 | Lama2, 16773:down                                                                                                                 |
| Activation of G protein gated Potassium channels                     | Reactome     | R-MMU-1296041 | 3. 129E-01 | 4. 467E-01 | Kcnj15, 16516:down                                                                                                                |
| DAG and IP3 signaling                                                | Reactome     | R-MMU-1489509 | 3. 224E-01 | 4. 575E-01 | Prkar2b, 19088:up                                                                                                                 |
| PLC-gamma1 signalling                                                | Reactome     | R-MMU-167021  | 3. 224E-01 | 4. 575E-01 | Prkar2b, 19088:up                                                                                                                 |
| EPHA-mediated growth cone collapse                                   | Reactome     | R-MMU-3928663 | 3. 224E-01 | 4. 575E-01 | Vegfa, 22339:down                                                                                                                 |
| Vesicle-mediated transport                                           | Reactome     | R-MMU-5653656 | 3. 236E-01 | 4. 583E-01 | Kdelr3, 105785:down Sec23a, 20334:down Cd4, 12504:up Trf, 22041:up Wnt5a, 22418:down Tfrc, 22042:up Egfr, 13649:down Hp, 15439:up |
| Interleukin-6 family signaling                                       | Reactome     | R-MMU-6783589 | 3. 317E-01 | 4. 660E-01 | Cr1f1, 12931:down                                                                                                                 |
| Cargo concentration in the ER                                        | Reactome     | R-MMU-5694530 | 3. 317E-01 | 4. 660E-01 | Sec23a, 20334:down                                                                                                                |
| Ca-dependent events                                                  | Reactome     | R-MMU-111996  | 3. 317E-01 | 4. 660E-01 | Prkar2b, 19088:up                                                                                                                 |
| Endosomal/Vacuolar pathway                                           | Reactome     | R-MMU-1236977 | 3. 317E-01 | 4. 660E-01 | H2-T24, 15042:up                                                                                                                  |
| Small cell lung cancer                                               | KEGG PATHWAY | mmu05222      | 3. 381E-01 | 4. 740E-01 | Ptgs2, 19225:down Lama2, 16773:down                                                                                               |
| Ca2+ pathway                                                         | Reactome     | R-MMU-4086398 | 3. 410E-01 | 4. 771E-01 | Wnt5a, 22418:down                                                                                                                 |
| Viral myocarditis                                                    | KEGG PATHWAY | mmu05416      | 3. 431E-01 | 4. 791E-01 | H2-T24, 15042:up Lama2, 16773:down                                                                                                |
| ErbB signaling pathway                                               | KEGG PATHWAY | mmu04012      | 3. 481E-01 | 4. 840E-01 | Nrg1, 211323:down Egfr, 13649:down                                                                                                |

|                                                                      |              |               |           |           |                                                                                       |
|----------------------------------------------------------------------|--------------|---------------|-----------|-----------|---------------------------------------------------------------------------------------|
| Synthesis of bile acids and bile salts                               | Reactome     | R-MMU-192105  | 3.501E-01 | 4.840E-01 | Akr1c18, 105349:up                                                                    |
| Negative regulation of FGFR1 signaling                               | Reactome     | R-MMU-5654726 | 3.501E-01 | 4.840E-01 | Fgfr1, 14182:down                                                                     |
| Keratan sulfate/keratin metabolism                                   | Reactome     | R-MMU-1638074 | 3.501E-01 | 4.840E-01 | Pre1p, 116847:up                                                                      |
| GnRH signaling pathway                                               | KEGG PATHWAY | mmu04912      | 3.531E-01 | 4.872E-01 | Mmp2, 17390:down Egfr, 13649:down                                                     |
| Glucagon-type ligand receptors                                       | Reactome     | R-MMU-420092  | 3.590E-01 | 4.926E-01 | Glp1r, 14652:down                                                                     |
| Sialic acid metabolism                                               | Reactome     | R-MMU-4085001 | 3.590E-01 | 4.926E-01 | Npl, 74091:up                                                                         |
| TP53 Regulates Transcription of Cell Cycle Genes                     | Reactome     | R-MMU-6791312 | 3.590E-01 | 4.926E-01 | Plk2, 20620:down                                                                      |
| Inwardly rectifying K+ channels                                      | Reactome     | R-MMU-1296065 | 3.679E-01 | 5.017E-01 | Kcnj15, 16516:down                                                                    |
| Gamma carboxylation, hypusine formation and arylsulfatase activation | Reactome     | R-MMU-163841  | 3.679E-01 | 5.017E-01 | Gas6, 14456:up                                                                        |
| Negative regulation of FGFR2 signaling                               | Reactome     | R-MMU-5654727 | 3.679E-01 | 5.017E-01 | Fgfr2, 14183:up                                                                       |
| HTLV-I infection                                                     | KEGG PATHWAY | mmu05166      | 3.686E-01 | 5.017E-01 | Tgfb2, 21808:down Tnf, 21926:up H2-T24, 15042:up Wnt5a, 22418:down Tgfb3, 21809:down  |
| Neuroactive ligand-receptor interaction                              | KEGG PATHWAY | mmu04080      | 3.713E-01 | 5.044E-01 | Ednrb, 13618:up Glp1r, 14652:down Htr2b, 15559:down Htr2a, 15558:down Ptgir, 19222:up |
| mTOR signaling pathway                                               | KEGG PATHWAY | mmu04150      | 3.723E-01 | 5.047E-01 | Tnf, 21926:up Igf1, 16000:up Wnt5a, 22418:down                                        |
| Metabolism of water-soluble vitamins and cofactors                   | Reactome     | R-MMU-196849  | 3.730E-01 | 5.047E-01 | Ptgs2, 19225:down Pdxk, 216134:up                                                     |
| beta-Alanine metabolism                                              | KEGG PATHWAY | mmu00410      | 3.766E-01 | 5.068E-01 | Aldh1a3, 56847:down                                                                   |
| Glucagon signaling in metabolic regulation                           | Reactome     | R-MMU-163359  | 3.766E-01 | 5.068E-01 | Prkar2b, 19088:up                                                                     |
| Metabolism of nucleotides                                            | Reactome     | R-MMU-15869   | 3.828E-01 | 5.140E-01 | Ampd3, 11717:up Uck2, 80914:down                                                      |
| Prion diseases                                                       | KEGG PATHWAY | mmu05020      | 3.852E-01 | 5.154E-01 | Ncam1, 17967:down                                                                     |
| Binding and Uptake of Ligands by Scavenger Receptors                 | Reactome     | R-MMU-2173782 | 3.852E-01 | 5.154E-01 | Hp, 15439:up                                                                          |
| Cell-Cell communication                                              | Reactome     | R-MMU-1500931 | 3.877E-01 | 5.176E-01 | Sirpb1a, 320832:down Sirpb1b, 668101:down                                             |
| @@Purine metabolism                                                  | Reactome     | R-MMU-73847   | 3.937E-01 | 5.198E-01 | Ampd3, 11717:up                                                                       |
| Primary immunodeficiency                                             | KEGG PATHWAY | mmu05340      | 3.937E-01 | 5.198E-01 | Cd4, 12504:up                                                                         |
| Fructose and mannose metabolism                                      | KEGG PATHWAY | mmu00051      | 3.937E-01 | 5.198E-01 | Sord, 20322:up                                                                        |
| African trypanosomiasis                                              | KEGG PATHWAY | mmu05143      | 3.937E-01 | 5.198E-01 | Tnf, 21926:up                                                                         |
| ER-Phagosome pathway                                                 | Reactome     | R-MMU-1236974 | 3.937E-01 | 5.198E-01 | H2-T24, 15042:up                                                                      |

|                                                                               |              |               |           |           |                                                                                                                      |
|-------------------------------------------------------------------------------|--------------|---------------|-----------|-----------|----------------------------------------------------------------------------------------------------------------------|
| Prolactin receptor signaling                                                  | Reactome     | R-MMU-1170546 | 3.937E-01 | 5.198E-01 | Pr12c2, 18811:up                                                                                                     |
| Membrane Trafficking                                                          | Reactome     | R-MMU-199991  | 3.961E-01 | 5.219E-01 | Kdelr3, 105785:down Sec23a, 20334:down Cd4, 12504:up Trf, 22041:up Wnt5a, 22418:down Tfrc, 22042:up Egfr, 13649:down |
| Stimuli-sensing channels                                                      | Reactome     | R-MMU-2672351 | 3.974E-01 | 5.227E-01 | Mcoln3, 171166:up Mcoln2, 68279:up                                                                                   |
| Pentose and glucuronate interconversions                                      | KEGG PATHWAY | mmu00040      | 4.021E-01 | 5.251E-01 | Sord, 20322:up                                                                                                       |
| Glucagon-like Peptide-1 (GLP1) regulates insulin secretion                    | Reactome     | R-MMU-381676  | 4.021E-01 | 5.251E-01 | Glp1r, 14652:down                                                                                                    |
| TNF signaling                                                                 | Reactome     | R-MMU-75893   | 4.021E-01 | 5.251E-01 | Tnf, 21926:up                                                                                                        |
| Cardiac conduction                                                            | Reactome     | R-MMU-5576891 | 4.023E-01 | 5.251E-01 | Fxyd2, 11936:up Fxyd1, 56188:up                                                                                      |
| Alanine, aspartate and glutamate metabolism                                   | KEGG PATHWAY | mmu00250      | 4.104E-01 | 5.317E-01 | Gfpt2, 14584:down                                                                                                    |
| Transport of vitamins, nucleosides, and related molecules                     | Reactome     | R-MMU-425397  | 4.104E-01 | 5.317E-01 | Slc29a1, 63959:up                                                                                                    |
| EPH-ephrin mediated repulsion of cells                                        | Reactome     | R-MMU-3928665 | 4.185E-01 | 5.383E-01 | Mmp2, 17390:down                                                                                                     |
| Interleukin-1 signaling                                                       | Reactome     | R-MMU-446652  | 4.185E-01 | 5.383E-01 | Il1rn, 16181:up                                                                                                      |
| Histidine, lysine, phenylalanine, tyrosine, proline and tryptophan catabolism | Reactome     | R-MMU-6788656 | 4.266E-01 | 5.466E-01 | Hal, 15109:up                                                                                                        |
| Alzheimer's disease                                                           | KEGG PATHWAY | mmu05010      | 4.315E-01 | 5.488E-01 | Tnf, 21926:up Mme, 17380:up Lpl, 16956:up                                                                            |
| cGMP-PKG signaling pathway                                                    | KEGG PATHWAY | mmu04022      | 4.315E-01 | 5.488E-01 | Creb3l1, 26427:down Fxyd2, 11936:up Ednrb, 13618:up                                                                  |
| Fat digestion and absorption                                                  | KEGG PATHWAY | mmu04975      | 4.345E-01 | 5.488E-01 | Plpp3, 67916:up                                                                                                      |
| PLC beta mediated events                                                      | Reactome     | R-MMU-112043  | 4.345E-01 | 5.488E-01 | Prkar2b, 19088:up                                                                                                    |
| Phospholipase C-mediated cascade; FGFR3                                       | Reactome     | R-MMU-5654227 | 4.345E-01 | 5.488E-01 | Prkar2b, 19088:up                                                                                                    |
| GABA B receptor activation                                                    | Reactome     | R-MMU-977444  | 4.345E-01 | 5.488E-01 | Kcnj15, 16516:down                                                                                                   |
| Activation of GABAB receptors                                                 | Reactome     | R-MMU-991365  | 4.345E-01 | 5.488E-01 | Kcnj15, 16516:down                                                                                                   |
| T cell receptor signaling pathway                                             | KEGG PATHWAY | mmu04660      | 4.356E-01 | 5.492E-01 | Tnf, 21926:up Cd4, 12504:up                                                                                          |
| Bile acid and bile salt metabolism                                            | Reactome     | R-MMU-194068  | 4.423E-01 | 5.527E-01 | Akr1c18, 105349:up                                                                                                   |
| G-protein mediated events                                                     | Reactome     | R-MMU-112040  | 4.423E-01 | 5.527E-01 | Prkar2b, 19088:up                                                                                                    |
| Phospholipase C-mediated cascade; FGFR4                                       | Reactome     | R-MMU-5654228 | 4.423E-01 | 5.527E-01 | Prkar2b, 19088:up                                                                                                    |
| Death Receptor Signalling                                                     | Reactome     | R-MMU-73887   | 4.423E-01 | 5.527E-01 | Tnf, 21926:up                                                                                                        |
| Asparagine N-linked glycosylation                                             | Reactome     | R-MMU-446203  | 4.443E-01 | 5.542E-01 | Gfpt2, 14584:down Npl, 74091:up Man2a2, 140481:up Sec23a, 20334:down                                                 |

|                                                              |              |               |            |            |                                                                                                                                                                                                                                                   |
|--------------------------------------------------------------|--------------|---------------|------------|------------|---------------------------------------------------------------------------------------------------------------------------------------------------------------------------------------------------------------------------------------------------|
| GPCR downstream signaling                                    | Reactome     | R-MMU-388396  | 4. 493E-01 | 5. 573E-01 | Ednrb, 13618:up Glp1r, 14652:down Cc19, 20308:up Cxc112, 20315:up Cc16, 20305:up Kng1, 16644:up Kng2, 385643:up Adm, 11535:up Cxcr6, 80901:down Cxc19, 17329:up Pbbp, 57349:down Ptgir, 19222:up C3, 12266:up Htr2b, 15559:down Htr2a, 15558:down |
| @Axon guidance                                               | KEGG PATHWAY | mmu04360      | 4. 496E-01 | 5. 573E-01 | Sema7a, 20361:down Cxc112, 20315:up Wnt5a, 22418:down                                                                                                                                                                                             |
| Intestinal immune network for IgA production                 | KEGG PATHWAY | mmu04672      | 4. 500E-01 | 5. 573E-01 | Cxc112, 20315:up                                                                                                                                                                                                                                  |
| Vasopressin regulates renal water homeostasis via Aquaporins | Reactome     | R-MMU-432040  | 4. 500E-01 | 5. 573E-01 | Prkar2b, 19088:up                                                                                                                                                                                                                                 |
| @Purine metabolism                                           | KEGG PATHWAY | mmu00230      | 4. 532E-01 | 5. 603E-01 | Ampd3, 11717:up Enpp3, 209558:down Enpp1, 18605:down                                                                                                                                                                                              |
| Vasopressin-regulated water reabsorption                     | KEGG PATHWAY | mmu04962      | 4. 576E-01 | 5. 638E-01 | Creb311, 26427:down                                                                                                                                                                                                                               |
| Sphingolipid de novo biosynthesis                            | Reactome     | R-MMU-1660661 | 4. 576E-01 | 5. 638E-01 | Plpp3, 67916:up                                                                                                                                                                                                                                   |
| SLC-mediated transmembrane transport                         | Reactome     | R-MMU-425407  | 4. 625E-01 | 5. 688E-01 | Slc40a1, 53945:up Emb, 13723:up Slc29a1, 63959:up Slc2a6, 227659:up                                                                                                                                                                               |
| Ether lipid metabolism                                       | KEGG PATHWAY | mmu00565      | 4. 651E-01 | 5. 690E-01 | Plpp3, 67916:up                                                                                                                                                                                                                                   |
| DNA Damage/Telomere Stress Induced Senescence                | Reactome     | R-MMU-2559586 | 4. 651E-01 | 5. 690E-01 | Hmgal-rs1, 111241:up                                                                                                                                                                                                                              |
| Growth hormone receptor signaling                            | Reactome     | R-MMU-982772  | 4. 651E-01 | 5. 690E-01 | Pr12c2, 18811:up                                                                                                                                                                                                                                  |
| Carbohydrate digestion and absorption                        | KEGG PATHWAY | mmu04973      | 4. 725E-01 | 5. 770E-01 | Fxyd2, 11936:up                                                                                                                                                                                                                                   |
| Tryptophan metabolism                                        | KEGG PATHWAY | mmu00380      | 4. 798E-01 | 5. 849E-01 | Maob, 109731:up                                                                                                                                                                                                                                   |
| Thyroid hormone signaling pathway                            | KEGG PATHWAY | mmu04919      | 4. 903E-01 | 5. 967E-01 | Fxyd2, 11936:up Bmp4, 12159:up                                                                                                                                                                                                                    |
| Sphingolipid metabolism                                      | KEGG PATHWAY | mmu00600      | 4. 941E-01 | 5. 971E-01 | Plpp3, 67916:up                                                                                                                                                                                                                                   |
| Cysteine and methionine metabolism                           | KEGG PATHWAY | mmu00270      | 4. 941E-01 | 5. 971E-01 | Cdo1, 12583:up                                                                                                                                                                                                                                    |
| GPVI-mediated activation cascade                             | Reactome     | R-MMU-114604  | 4. 941E-01 | 5. 971E-01 | Col1a2, 12843:down                                                                                                                                                                                                                                |
| Aquaporin-mediated transport                                 | Reactome     | R-MMU-445717  | 4. 941E-01 | 5. 971E-01 | Prkar2b, 19088:up                                                                                                                                                                                                                                 |
| N-Glycan biosynthesis                                        | KEGG PATHWAY | mmu00510      | 5. 010E-01 | 6. 045E-01 | Man2a2, 140481:up                                                                                                                                                                                                                                 |
| Leukocyte transendothelial migration                         | KEGG PATHWAY | mmu04670      | 5. 078E-01 | 6. 108E-01 | Mmp2, 17390:down Cxc112, 20315:up                                                                                                                                                                                                                 |
| Golgi Associated Vesicle Biogenesis                          | Reactome     | R-MMU-432722  | 5. 079E-01 | 6. 108E-01 | Tfrc, 22042:up                                                                                                                                                                                                                                    |
| Metabolism of lipids and lipoproteins                        | Reactome     | R-MMU-556833  | 5. 124E-01 | 6. 147E-01 | Hpgd, 15446:up Ggt5, 23887:up Fabp5, 16592:up Ptgs2, 19225:down Lp1, 16956:up Fabp4, 11770:up Plpp3, 67916:up Gdpd1, 66569:up Akr1c18, 105349:up                                                                                                  |
| Drug metabolism - other enzymes                              | KEGG PATHWAY | mmu00983      | 5. 147E-01 | 6. 147E-01 | Uck2, 80914:down                                                                                                                                                                                                                                  |
| COPI-dependent Golgi-to-ER retrograde traffic                | Reactome     | R-MMU-6811434 | 5. 147E-01 | 6. 147E-01 | Kdelr3, 105785:down                                                                                                                                                                                                                               |

|                                                                                       |              |               |            |            |                                                       |
|---------------------------------------------------------------------------------------|--------------|---------------|------------|------------|-------------------------------------------------------|
| Cell cycle                                                                            | KEGG PATHWAY | mmu04110      | 5. 207E-01 | 6. 185E-01 | Tgfb2, 21808:down Tgfb3, 21809:down                   |
| Endometrial cancer                                                                    | KEGG PATHWAY | mmu05213      | 5. 215E-01 | 6. 185E-01 | Egfr, 13649:down                                      |
| Amyotrophic lateral sclerosis (ALS)                                                   | KEGG PATHWAY | mmu05014      | 5. 215E-01 | 6. 185E-01 | Tnf, 21926:up                                         |
| Lysine degradation                                                                    | KEGG PATHWAY | mmu00310      | 5. 215E-01 | 6. 185E-01 | Plod2, 26432:down                                     |
| Platelet homeostasis                                                                  | Reactome     | R-MMU-418346  | 5. 281E-01 | 6. 253E-01 | Ptgir, 19222:up                                       |
| Alcoholism                                                                            | KEGG PATHWAY | mmu05034      | 5. 327E-01 | 6. 298E-01 | Creb311, 26427:down Slc29a1, 63959:up Maob, 109731:up |
| Non-small cell lung cancer                                                            | KEGG PATHWAY | mmu05223      | 5. 474E-01 | 6. 427E-01 | Egfr, 13649:down                                      |
| Lipoprotein metabolism                                                                | Reactome     | R-MMU-174824  | 5. 474E-01 | 6. 427E-01 | Lpl, 16956:up                                         |
| GABA receptor activation                                                              | Reactome     | R-MMU-977443  | 5. 474E-01 | 6. 427E-01 | Kcnj15, 16516:down                                    |
| Asymmetric localization of PCP proteins                                               | Reactome     | R-MMU-4608870 | 5. 474E-01 | 6. 427E-01 | Wnt5a, 22418:down                                     |
| COPII (Coat Protein 2) Mediated Vesicle Transport                                     | Reactome     | R-MMU-204005  | 5. 536E-01 | 6. 479E-01 | Sec23a, 20334:down                                    |
| PI Metabolism                                                                         | Reactome     | R-MMU-1483255 | 5. 536E-01 | 6. 479E-01 | Gdpd1, 66569:up                                       |
| Dopaminergic synapse                                                                  | KEGG PATHWAY | mmu04728      | 5. 579E-01 | 6. 518E-01 | Creb311, 26427:down Maob, 109731:up                   |
| Opioid Signalling                                                                     | Reactome     | R-MMU-111885  | 5. 598E-01 | 6. 519E-01 | Prkar2b, 19088:up                                     |
| Costimulation by the CD28 family                                                      | Reactome     | R-MMU-388841  | 5. 598E-01 | 6. 519E-01 | Cd4, 12504:up                                         |
| Signaling by TGF-beta Receptor Complex                                                | Reactome     | R-MMU-170834  | 5. 719E-01 | 6. 637E-01 | Pmepa1, 65112:down                                    |
| Measles                                                                               | KEGG PATHWAY | mmu05162      | 5. 737E-01 | 6. 648E-01 | Oas1a, 246730:up Oas3, 246727:up                      |
| Cytosolic DNA-sensing pathway                                                         | KEGG PATHWAY | mmu04623      | 5. 778E-01 | 6. 662E-01 | Cc14, 20303:up                                        |
| Long-term depression                                                                  | KEGG PATHWAY | mmu04730      | 5. 778E-01 | 6. 662E-01 | Igf1, 16000:up                                        |
| Metabolism of amino acids and derivatives                                             | Reactome     | R-MMU-71291   | 5. 841E-01 | 6. 723E-01 | Cdo1, 12583:up Gatm, 67092:down Hal, 15109:up         |
| Transport to the Golgi and subsequent modification                                    | Reactome     | R-MMU-948021  | 5. 892E-01 | 6. 771E-01 | Sec23a, 20334:down Man2a2, 140481:up                  |
| Longevity regulating pathway - multiple species                                       | KEGG PATHWAY | mmu04213      | 5. 951E-01 | 6. 827E-01 | Igf1, 16000:up                                        |
| Glycolysis / Gluconeogenesis                                                          | KEGG PATHWAY | mmu00010      | 6. 007E-01 | 6. 858E-01 | Aldh1a3, 56847:down                                   |
| Loss of proteins required for interphase microtubule organization from the centrosome | Reactome     | R-MMU-380284  | 6. 007E-01 | 6. 858E-01 | Prkar2b, 19088:up                                     |
| Loss of Nlp from mitotic centrosomes                                                  | Reactome     | R-MMU-380259  | 6. 007E-01 | 6. 858E-01 | Prkar2b, 19088:up                                     |
| trans-Golgi Network Vesicle Budding                                                   | Reactome     | R-MMU-199992  | 6. 062E-01 | 6. 899E-01 | Tfrc, 22042:up                                        |



|                                                          |              |               |           |           |                                                   |
|----------------------------------------------------------|--------------|---------------|-----------|-----------|---------------------------------------------------|
| Clathrin derived vesicle budding                         | Reactome     | R-MMU-421837  | 6.062E-01 | 6.899E-01 | Tfrc, 22042:up                                    |
| Fc epsilon RI signaling pathway                          | KEGG PATHWAY | mmu04664      | 6.117E-01 | 6.949E-01 | Tnf, 21926:up                                     |
| RIG-I-like receptor signaling pathway                    | KEGG PATHWAY | mmu04622      | 6.170E-01 | 6.988E-01 | Tnf, 21926:up                                     |
| AURKA Activation by TPX2                                 | Reactome     | R-MMU-8854518 | 6.170E-01 | 6.988E-01 | Prkar2b, 19088:up                                 |
| Adrenergic signaling in cardiomyocytes                   | KEGG PATHWAY | mmu04261      | 6.260E-01 | 7.077E-01 | Creb311, 26427:down Fxyd2, 11936:up               |
| Bile secretion                                           | KEGG PATHWAY | mmu04976      | 6.327E-01 | 7.122E-01 | Fxyd2, 11936:up                                   |
| Non-alcoholic fatty liver disease (NAFLD)                | KEGG PATHWAY | mmu04932      | 6.330E-01 | 7.122E-01 | Tnf, 21926:up Adipoq, 11450:up                    |
| Muscle contraction                                       | Reactome     | R-MMU-397014  | 6.365E-01 | 7.149E-01 | Fxyd2, 11936:up Fxyd1, 56188:up                   |
| Viral carcinogenesis                                     | KEGG PATHWAY | mmu05203      | 6.374E-01 | 7.149E-01 | Creb311, 26427:down H2-T24, 15042:up C3, 12266:up |
| Gastric acid secretion                                   | KEGG PATHWAY | mmu04971      | 6.428E-01 | 7.159E-01 | Kcnj15, 16516:down                                |
| Regulation of insulin secretion                          | Reactome     | R-MMU-422356  | 6.428E-01 | 7.159E-01 | Glp1r, 14652:down                                 |
| Centrosome maturation                                    | Reactome     | R-MMU-380287  | 6.428E-01 | 7.159E-01 | Prkar2b, 19088:up                                 |
| Recruitment of mitotic centrosome proteins and complexes | Reactome     | R-MMU-380270  | 6.428E-01 | 7.159E-01 | Prkar2b, 19088:up                                 |
| TCF dependent signaling in response to WNT               | Reactome     | R-MMU-201681  | 6.434E-01 | 7.159E-01 | Rspo2, 239405:up Wnt5a, 22418:down                |
| Oxytocin signaling pathway                               | KEGG PATHWAY | mmu04921      | 6.502E-01 | 7.223E-01 | Ptgs2, 19225:down Egfr, 13649:down                |
| Autoimmune thyroid disease                               | KEGG PATHWAY | mmu05320      | 6.622E-01 | 7.327E-01 | H2-T24, 15042:up                                  |
| Salivary secretion                                       | KEGG PATHWAY | mmu04970      | 6.622E-01 | 7.327E-01 | Fxyd2, 11936:up                                   |
| Bacterial invasion of epithelial cells                   | KEGG PATHWAY | mmu05100      | 6.668E-01 | 7.327E-01 | Itga5, 16402:down                                 |
| Cardiac muscle contraction                               | KEGG PATHWAY | mmu04260      | 6.668E-01 | 7.327E-01 | Fxyd2, 11936:up                                   |
| PCP/CE pathway                                           | Reactome     | R-MMU-4086400 | 6.668E-01 | 7.327E-01 | Wnt5a, 22418:down                                 |
| Metabolism of polyamines                                 | Reactome     | R-MMU-351202  | 6.668E-01 | 7.327E-01 | Gatm, 67092:down                                  |
| Golgi-to-ER retrograde transport                         | Reactome     | R-MMU-8856688 | 6.668E-01 | 7.327E-01 | Kdelr3, 105785:down                               |
| @@Sphingolipid metabolism                                | Reactome     | R-MMU-428157  | 6.714E-01 | 7.366E-01 | Plpp3, 67916:up                                   |
| Regulation of PLK1 Activity at G2/M Transition           | Reactome     | R-MMU-2565942 | 6.760E-01 | 7.404E-01 | Prkar2b, 19088:up                                 |
| Aldosterone synthesis and secretion                      | KEGG PATHWAY | mmu04925      | 6.978E-01 | 7.619E-01 | Creb311, 26427:down                               |
| Downstream TCR signaling                                 | Reactome     | R-MMU-202424  | 7.020E-01 | 7.653E-01 | Cd4, 12504:up                                     |
| Steroid hormone biosynthesis                             | KEGG PATHWAY | mmu00140      | 7.061E-01 | 7.686E-01 | Akr1c18, 105349:up                                |
| Fc gamma R-mediated phagocytosis                         | KEGG PATHWAY | mmu04666      | 7.102E-01 | 7.718E-01 | Plpp3, 67916:up                                   |

|                                                                       |              |               |           |           |                                                                 |
|-----------------------------------------------------------------------|--------------|---------------|-----------|-----------|-----------------------------------------------------------------|
| Retinol metabolism                                                    | KEGG PATHWAY | mmu00830      | 7.142E-01 | 7.726E-01 | Aldh1a2, 19378:up                                               |
| Progesterone-mediated oocyte maturation                               | KEGG PATHWAY | mmu04914      | 7.142E-01 | 7.726E-01 | Igf1, 16000:up                                                  |
| MHC class II antigen presentation                                     | Reactome     | R-MMU-2132295 | 7.142E-01 | 7.726E-01 | Sec23a, 20334:down                                              |
| Antigen processing-Cross presentation                                 | Reactome     | R-MMU-1236975 | 7.181E-01 | 7.757E-01 | H2-T24, 15042:up                                                |
| Anchoring of the basal body to the plasma membrane                    | Reactome     | R-MMU-5620912 | 7.221E-01 | 7.775E-01 | Prkar2b, 19088:up                                               |
| UCH proteinases                                                       | Reactome     | R-MMU-5689603 | 7.221E-01 | 7.775E-01 | Uch15, 56207:up                                                 |
| Glycerophospholipid metabolism                                        | KEGG PATHWAY | mmu00564      | 7.334E-01 | 7.874E-01 | Plpp3, 67916:up                                                 |
| Potassium Channels                                                    | Reactome     | R-MMU-1296071 | 7.334E-01 | 7.874E-01 | Kcnj15, 16516:down                                              |
| Huntington's disease                                                  | KEGG PATHWAY | mmu05016      | 7.503E-01 | 8.042E-01 | Creb311, 26427:down Pparg, 19016:up                             |
| Glucagon signaling pathway                                            | KEGG PATHWAY | mmu04922      | 7.582E-01 | 8.102E-01 | Creb311, 26427:down                                             |
| Beta-catenin independent WNT signaling                                | Reactome     | R-MMU-3858494 | 7.582E-01 | 8.102E-01 | Wnt5a, 22418:down                                               |
| @@Pyrimidine metabolism                                               | KEGG PATHWAY | mmu00240      | 7.616E-01 | 8.113E-01 | Uck2, 80914:down                                                |
| Retrograde endocannabinoid signaling                                  | KEGG PATHWAY | mmu04723      | 7.616E-01 | 8.113E-01 | Ptgs2, 19225:down                                               |
| Pancreatic secretion                                                  | KEGG PATHWAY | mmu04972      | 7.649E-01 | 8.115E-01 | Fxyd2, 11936:up                                                 |
| Class I MHC mediated antigen processing & presentation                | Reactome     | R-MMU-983169  | 7.652E-01 | 8.115E-01 | Sec23a, 20334:down H2-T24, 15042:up                             |
| TCR signaling                                                         | Reactome     | R-MMU-202403  | 7.745E-01 | 8.201E-01 | Cd4, 12504:up                                                   |
| Factors involved in megakaryocyte development and platelet production | Reactome     | R-MMU-983231  | 7.776E-01 | 8.222E-01 | Prkar2b, 19088:up                                               |
| Hedgehog 'off' state                                                  | Reactome     | R-MMU-5610787 | 7.807E-01 | 8.241E-01 | Prkar2b, 19088:up                                               |
| Generic Transcription Pathway                                         | Reactome     | R-MMU-212436  | 7.818E-01 | 8.241E-01 | Vdr, 22337:down Pparg, 19016:up Igf1, 16000:up Plk2, 20620:down |
| C-type lectin receptors (CLRs)                                        | Reactome     | R-MMU-5621481 | 7.897E-01 | 8.300E-01 | Clec4n, 56620:up                                                |
| ER to Golgi Anterograde Transport                                     | Reactome     | R-MMU-199977  | 7.897E-01 | 8.300E-01 | Sec23a, 20334:down                                              |
| Cholinergic synapse                                                   | KEGG PATHWAY | mmu04725      | 7.926E-01 | 8.318E-01 | Creb311, 26427:down                                             |
| Oocyte meiosis                                                        | KEGG PATHWAY | mmu04114      | 8.011E-01 | 8.370E-01 | Igf1, 16000:up                                                  |
| Mus musculus biological processes                                     | Reactome     | R-MMU-5334727 | 8.012E-01 | 8.370E-01 | Tnf, 21926:up Fabp4, 11770:up                                   |
| Natural killer cell mediated cytotoxicity                             | KEGG PATHWAY | mmu04650      | 8.119E-01 | 8.470E-01 | Tnf, 21926:up                                                   |
| Sphingolipid signaling pathway                                        | KEGG PATHWAY | mmu04071      | 8.246E-01 | 8.576E-01 | Tnf, 21926:up                                                   |

|                                                                                        |              |               |           |           |                                                                                                     |
|----------------------------------------------------------------------------------------|--------------|---------------|-----------|-----------|-----------------------------------------------------------------------------------------------------|
| Toll-Like Receptors Cascades                                                           | Reactome     | R-MMU-168898  | 8.246E-01 | 8.576E-01 | S100a1, 20193:up                                                                                    |
| Signaling by Wnt                                                                       | Reactome     | R-MMU-195721  | 8.267E-01 | 8.585E-01 | Rspo2, 239405:up Wnt5a, 22418:down                                                                  |
| Cellular Senescence                                                                    | Reactome     | R-MMU-2559583 | 8.318E-01 | 8.626E-01 | Hmgal-rs1, 111241:up                                                                                |
| Vascular smooth muscle contraction                                                     | KEGG PATHWAY | mmu04270      | 8.341E-01 | 8.637E-01 | Ptgir, 19222:up                                                                                     |
| Neurotransmitter Receptor Binding And Downstream Transmission In The Postsynaptic Cell | Reactome     | R-MMU-112314  | 8.431E-01 | 8.717E-01 | Kcnj15, 16516:down                                                                                  |
| Intra-Golgi and retrograde Golgi-to-ER traffic                                         | Reactome     | R-MMU-6811442 | 8.475E-01 | 8.736E-01 | Kdelr3, 105785:down                                                                                 |
| Phase 1 - Functionalization of compounds                                               | Reactome     | R-MMU-211945  | 8.475E-01 | 8.736E-01 | Maob, 109731:up                                                                                     |
| Apoptosis                                                                              | KEGG PATHWAY | mmu04210      | 8.557E-01 | 8.809E-01 | Tnf, 21926:up                                                                                       |
| Tight junction                                                                         | KEGG PATHWAY | mmu04530      | 8.597E-01 | 8.837E-01 | Shroom4, 208431:down                                                                                |
| Insulin signaling pathway                                                              | KEGG PATHWAY | mmu04910      | 8.617E-01 | 8.844E-01 | Prkar2b, 19088:up                                                                                   |
| Transcriptional Regulation by TP53                                                     | Reactome     | R-MMU-3700989 | 8.662E-01 | 8.877E-01 | Igfbp3, 16009:up P1k2, 20620:down                                                                   |
| Signaling by Hedgehog                                                                  | Reactome     | R-MMU-5358351 | 8.710E-01 | 8.913E-01 | Prkar2b, 19088:up                                                                                   |
| Phospholipid metabolism                                                                | Reactome     | R-MMU-1483257 | 8.830E-01 | 9.023E-01 | Gdpd1, 66569:up                                                                                     |
| G2/M Transition                                                                        | Reactome     | R-MMU-69275   | 8.878E-01 | 9.059E-01 | Prkar2b, 19088:up                                                                                   |
| Mitotic G2-G2/M phases                                                                 | Reactome     | R-MMU-453274  | 8.909E-01 | 9.078E-01 | Prkar2b, 19088:up                                                                                   |
| Post-translational protein modification                                                | Reactome     | R-MMU-597592  | 8.991E-01 | 9.148E-01 | Sec23a, 20334:down Npl, 74091:up Man2a2, 140481:up Gas6, 14456:up Uch15, 56207:up Gfpt2, 14584:down |
| Protein processing in endoplasmic reticulum                                            | KEGG PATHWAY | mmu04141      | 9.025E-01 | 9.168E-01 | Sec23a, 20334:down                                                                                  |
| Assembly of the primary cilium                                                         | Reactome     | R-MMU-5617833 | 9.116E-01 | 9.247E-01 | Prkar2b, 19088:up                                                                                   |
| Cellular responses to stress                                                           | Reactome     | R-MMU-2262752 | 9.170E-01 | 9.290E-01 | Hmgal-rs1, 111241:up Epas1, 13819:up                                                                |
| Transmission across Chemical Synapses                                                  | Reactome     | R-MMU-112315  | 9.322E-01 | 9.430E-01 | Kcnj15, 16516:down                                                                                  |
| Biological oxidations                                                                  | Reactome     | R-MMU-211859  | 9.488E-01 | 9.583E-01 | Maob, 109731:up                                                                                     |
| Epstein-Barr virus infection                                                           | KEGG PATHWAY | mmu05169      | 9.522E-01 | 9.605E-01 | H2-T24, 15042:up                                                                                    |
| Deubiquitination                                                                       | Reactome     | R-MMU-5688426 | 9.607E-01 | 9.676E-01 | Uch15, 56207:up                                                                                     |
| Organelle biogenesis and maintenance                                                   | Reactome     | R-MMU-1852241 | 9.800E-01 | 9.856E-01 | Prkar2b, 19088:up                                                                                   |
| Neuronal System                                                                        | Reactome     | R-MMU-112316  | 9.853E-01 | 9.895E-01 | Kcnj15, 16516:down                                                                                  |
| Cell Cycle, Mitotic                                                                    | Reactome     | R-MMU-69278   | 9.972E-01 | 9.993E-01 | Prkar2b, 19088:up                                                                                   |

|                 |          |               |           |           |                                                                                                        |
|-----------------|----------|---------------|-----------|-----------|--------------------------------------------------------------------------------------------------------|
| Gene Expression | Reactome | R-MMU-74160   | 9.979E-01 | 9.993E-01 | Pparg, 19016:up Nabp1, 109019:down Plk2, 20620:down Ice1, 218333:down Vdr, 22337:down Igfbp3, 16009:up |
| @Cell Cycle     | Reactome | R-MMU-1640170 | 9.997E-01 | 9.997E-01 | Prkar2b, 19088:up                                                                                      |
