# Supplementary material for: MicroRNA-26b-5p Inhibits Mouse Liver Fibrogenesis and Angiogenesis by Targeting PDGF Receptor-Beta
Source: PubMed Central journal article supplement (PMC6426711; doi:10.1016/j.omtn.2019.02.014), 2019-02-26
Supplement: mmc4.pdf [file mmc4.pdf]

**MicroRNA-26b-5p Inhibits Mouse Liver Fibrogenesis and Angiogenesis by Targeting PDGF Receptor-beta**  
 Le Yang#, Chengbin Dong#, Jingjing Yang, Lin Yang, Na Chang, Changbo Qi, Liying Li\*

**Supplementary table 4. GO terms (Biological Process) in TGF- $\beta$ 1-treated BMSCs with or without miR-26b-5p mimics**

| Term                                           | ID         | P-Value  | Corrected P-Value | input_gene                                                                                                                                                                                                                                                                                                                                                                                                                                                                                                                                                                                                                                                                                                                                                                                                                                                                                                                                                                                                                                                                                                                                                                                                                                                                                                                                                                                                                                                                                                                                                                                                                                                                                                                                                                                                                 |
|------------------------------------------------|------------|----------|-------------------|----------------------------------------------------------------------------------------------------------------------------------------------------------------------------------------------------------------------------------------------------------------------------------------------------------------------------------------------------------------------------------------------------------------------------------------------------------------------------------------------------------------------------------------------------------------------------------------------------------------------------------------------------------------------------------------------------------------------------------------------------------------------------------------------------------------------------------------------------------------------------------------------------------------------------------------------------------------------------------------------------------------------------------------------------------------------------------------------------------------------------------------------------------------------------------------------------------------------------------------------------------------------------------------------------------------------------------------------------------------------------------------------------------------------------------------------------------------------------------------------------------------------------------------------------------------------------------------------------------------------------------------------------------------------------------------------------------------------------------------------------------------------------------------------------------------------------|
| regulation of multicellular organismal process | GO:0051239 | 6.36E-22 | 6.43E-19          | Fstl3,83554:down Clec2d,93694:up Adm,11535:up Flrt2,399558:down Tmem176b,65963:up Plxnd1,67784:up Sfrp4,20379:up C3,12266:up Ankrd1,107765:down Cx3cr1,13051:down Cd109,235505:down Loxl2,94352:down Plk2,20620:down Trf,22041:up Cd24a,12484:down Wnt5a,22418:down Stc1,20855:up Il1rn,16181:up Adipoq,11450:up Bmp4,12159:up Igf1,16000:up Crabp2,12904:down Tgfb2,21808:down Hpse,15442:up F3,14066:up Fgfr2,14183:up Thbs2,21826:down Clec4e,56619:up Cthrc1,68588:down Htr2b,15559:down Kng1,16644:up Prl2c2,18811:up Efemp1,216616:up Dpysl3,22240:down Aspn,66695:down Vdr,22337:down Cxcl12,20315:up Htr2a,15558:down Mmp2,17390:down Gas6,14456:up Egfr,13649:down Sfrp1,20377:up C1qtnf3,81799:down Tgfb3,21814:up Tfrc,22042:up Ceacam1,26365:up Sfrp2,20319:up Rspo2,239405:up Npnt,114249:up Tnfrsf11b,18383:up S100a1,20193:up Col5a2,12832:down Ly9,17085:up Ccl2,20296:up Ednrb,13618:up Figf,14205:up Mgp,17313:up Mmp13,17386:up Sema7a,20361:down Epas1,13819:up Tnfrsf12a,27279:down Gpm6b,14758:up Ddah1,69219:down Clec4n,56620:up Postn,50706:down Ncam1,17967:down Bmpr1a,12166:down Wisp1,22402:down Ccl4,20303:up Ank,11732:down Ret,19713:up Prg4,96875:down Plpp3,67916:up Creb3l1,26427:down Il1r1,17082:down Kitl,17311:up Fam101b,76566:down Lrrc17,74511:down Lama2,16773:down Ptk7,71461:down Inhba,16323:down Plat,18791:down Ccl3,20302:up Ctla2a,13024:down Sprx2,68792:down Vegfa,22339:down Serpine2,20720:up Adamts12,239337:down Igf2,16002:up Anpep,16790:up Pparg,19016:up Tnf,21926:up Tmem176a,66058:up Glp1r,14652:down Lmcd1,30937:up Fxyd1,56188:up Fgfr1,14182:down Has2,15117:down Lpl,16956:up Hmox1,15368:up Sulf1,240725:down Ptgs2,19225:down Grem1,23892:up Col3a1,12825:down Serping1,12258:up Col5a1,12831:down Errfi1,74155:down Enpp1,18605:down Tnfsf9,21950:up |
| response to wounding                           | GO:0009611 | 1.41E-18 | 1.22E-15          | Adm,11535:up Ccl7,20306:up Ccl2,20296:up C3,12266:up Pdgfc,54635:down Ednrb,13618:up Sema7a,20361:down Tnfrsf12a,27279:down Cx3cr1,13051:down Cd109,235505:down Cd24a,12484:down Wnt5a,22418:down Ccl12,20293:up Ccl4,20303:up Adipoq,11450:up Igf1,16000:up Tnc,21923:down Tgfb2,21808:down Hpse,15442:up Plpp3,67916:up F3,14066:up Il1r1,17082:down Kng1,16644:up Ccl9,20308:up Ccl6,20305:up Ptk7,71461:down Aoa8,27052:up Anxa8,11752:down Nin1,18081:up Ccl3,20302:up Tfpi2,21789:down Ctla2a,13024:down Fabp4,11770:up Mmp2,17390:down Serpine2,20720:up Adamts12,239337:down Pparg,19016:up Gas6,14456:up Tnf,21926:up Egfr,13649:down Hmox1,15368:up C1qtnf3,81799:down Ptgs2,19225:down Col3a1,12825:down Ccl8,20307:up Ceacam1,26365:up Serping1,12258:up Col5a1,12831:down                                                                                                                                                                                                                                                                                                                                                                                                                                                                                                                                                                                                                                                                                                                                                                                                                                                                                                                                                                                                                                     |
| cell migration                                 | GO:0016477 | 3.91E-18 | 2.96E-15          | Flrt2,399558:down Plxnd1,67784:up Cx3cr1,13051:down Igf1,16000:up Loxl2,94352:down Cxl14,57266:down Cd24a,12484:down Wnt5a,22418:down Mark1,226778:up Stc1,20855:up Il1rn,16181:up Adipoq,11450:up Bmp4,12159:up Igf1,16000:up Cxcl9,17329:up Tgfb2,21808:down F3,14066:up Cthrc1,68588:down Htr2b,15559:down Prl2c2,18811:up Efemp1,216616:up Ccl6,20305:up Dpysl3,22240:down Saa3,20210:up Cxl12,20315:up Mmp2,17390:down Gas6,14456:up Egfr,13649:down Sfrp1,20377:up Tgfb3,21814:up Ccl8,20307:up Ceacam1,26365:up Sfrp2,20319:up Ccl2,20296:up Ccl7,20306:up Ednrb,13618:up Figf,14205:up Pdgfc,54635:down Sema7a,20361:down Tnfrsf12a,27279:down Postn,50706:down Ccl12,20293:up Bmpr1a,12166:down Ccl4,20303:up Ret,19713:up Plpp3,67916:up Kitl,17311:up Ccl9,20308:up Lama2,16773:down Ptk7,71461:down Ccl3,20302:up Plat,18791:down Sprx2,68792:down Vegfa,22339:down Lrrc15,74488:down Adamts12,239337:down Tnf,21926:up Fgfr1,14182:down Has2,15117:down Sulf1,240725:down Ptgs2,19225:down Grem1,23892:up Col3a1,12825:down Col5a1,12831:down                                                                                                                                                                                                                                                                                                                                                                                                                                                                                                                                                                                                                                                                                                                                                                 |
| cell motility                                  | GO:0048870 | 4.98E-18 | 3.02E-15          | Flrt2,399558:down Plxnd1,67784:up Cx3cr1,13051:down Igf1,16000:up Loxl2,94352:down Trf,22041:up Cxl14,57266:down Cd24a,12484:down Ceacam10,26366:up Wnt5a,22418:down Mark1,226778:up Stc1,20855:up Il1rn,16181:up Adipoq,11450:up Bmp4,12159:up Igf1,16000:up Cxcl9,17329:up Tgfb2,21808:down F3,14066:up Cthrc1,68588:down Htr2b,15559:down Prl2c2,18811:up Efemp1,216616:up Ccl6,20305:up Dpysl3,22240:down Saa3,20210:up Cxl12,20315:up Mmp2,17390:down Gas6,14456:up Egfr,13649:down Sfrp1,20377:up Tgfb3,21814:up Ccl8,20307:up Ceacam1,26365:up Sfrp2,20319:up Ccl2,20296:up Ccl7,20306:up Ednrb,13618:up Figf,14205:up Pdgfc,54635:down Sema7a,20361:down Sord,20322:up Tnfrsf12a,27279:down Postn,50706:down Ccl12,20293:up Bmpr1a,12166:down Ccl4,20303:up Ret,19713:up Plpp3,67916:up Kitl,17311:up Ccl9,20308:up Lama2,16773:down Ptk7,71461:down Ccl3,20302:up Plat,18791:down Sprx2,68792:down Vegfa,22339:down Adamts12,239337:down Lrrc15,74488:down Tnf,21926:up Fgfr1,14182:down Has2,15117:down Sulf1,240725:down Ptgs2,19225:down Grem1,23892:up Col3a1,12825:down Col5a1,12831:down                                                                                                                                                                                                                                                                                                                                                                                                                                                                                                                                                                                                                                                                                                                    |
| localization of cell                           | GO:0051674 | 4.98E-18 | 3.02E-15          | Flrt2,399558:down Plxnd1,67784:up Cx3cr1,13051:down Igf1,16000:up Loxl2,94352:down Trf,22041:up Cxl14,57266:down Cd24a,12484:down Ceacam10,26366:up Wnt5a,22418:down Mark1,226778:up Stc1,20855:up Il1rn,16181:up Adipoq,11450:up Bmp4,12159:up Igf1,16000:up Cxcl9,17329:up Tgfb2,21808:down F3,14066:up Cthrc1,68588:down Htr2b,15559:down Prl2c2,18811:up Efemp1,216616:up Ccl6,20305:up Dpysl3,22240:down Saa3,20210:up Cxl12,20315:up Mmp2,17390:down Gas6,14456:up Egfr,13649:down Sfrp1,20377:up Tgfb3,21814:up Ccl8,20307:up Ceacam1,26365:up Sfrp2,20319:up Ccl2,20296:up Ccl7,20306:up Ednrb,13618:up Figf,14205:up Pdgfc,54635:down Sema7a,20361:down Sord,20322:up Tnfrsf12a,27279:down Postn,50706:down Ccl12,20293:up Bmpr1a,12166:down Ccl4,20303:up Ret,19713:up Plpp3,67916:up Kitl,17311:up Ccl9,20308:up Lama2,16773:down Ptk7,71461:down Ccl3,20302:up Plat,18791:down Sprx2,68792:down Vegfa,22339:down Adamts12,239337:down Lrrc15,74488:down Tnf,21926:up Fgfr1,14182:down Has2,15117:down Sulf1,240725:down Ptgs2,19225:down Grem1,23892:up Col3a1,12825:down Col5a1,12831:down                                                                                                                                                                                                                                                                                                                                                                                                                                                                                                                                                                                                                                                                                                                    |
| vasculature development                        | GO:0001944 | 1.38E-17 | 7.63E-15          | Adm,11535:up Hpgd,15446:up Plxnd1,67784:up Ccl2,20296:up Aldh1a2,19378:up C3,12266:up Figf,14205:up Epas1,13819:up Tnfrsf12a,27279:down Ddah1,69219:down Ly11,17095:up Cx3cr1,13051:down Loxl2,94352:down Wnt5a,22418:down Bmpr1a,12166:down Ccl12,20293:up Col8a1,12837:down Bmp4,12159:up Igf1,16000:up Tgfb2,21808:down Vegfb,22340:up Hpse,15442:up Plpp3,67916:up Fgfr2,14183:up F3,14066:up Thbs2,21826:down Prl2c2,18811:up Ptk7,71461:down Sprx2,68792:down Cxl12,20315:up Vegfa,22339:down Mmp2,17390:down Anpep,16790:up Col1a2,12843:down Fgfr1,14182:down Has2,15117:down Hmox1,15368:up Sulf1,240725:down Tgfb3,21814:up Ptgs2,19225:down Grem1,23892:up Col3a1,12825:down Ceacam1,26365:up Sfrp2,20319:up Col5a1,12831:down Errfi1,74155:down                                                                                                                                                                                                                                                                                                                                                                                                                                                                                                                                                                                                                                                                                                                                                                                                                                                                                                                                                                                                                                                                |

|                                                         |            |          |          |                                                                                                                                                                                                                                                                                                                                                                                                                                                                                                                                                                                                                                                                                                                                                                                                                                                                                                                                                                                                                                                                                                                                                                                                                                                                                                                                                                                                                                                                                                                                                                                                                                                                                                                                                                                                           |
|---------------------------------------------------------|------------|----------|----------|-----------------------------------------------------------------------------------------------------------------------------------------------------------------------------------------------------------------------------------------------------------------------------------------------------------------------------------------------------------------------------------------------------------------------------------------------------------------------------------------------------------------------------------------------------------------------------------------------------------------------------------------------------------------------------------------------------------------------------------------------------------------------------------------------------------------------------------------------------------------------------------------------------------------------------------------------------------------------------------------------------------------------------------------------------------------------------------------------------------------------------------------------------------------------------------------------------------------------------------------------------------------------------------------------------------------------------------------------------------------------------------------------------------------------------------------------------------------------------------------------------------------------------------------------------------------------------------------------------------------------------------------------------------------------------------------------------------------------------------------------------------------------------------------------------------|
| ossification                                            | GO:0015103 | 4.24E-17 | 2.06E-14 | Fstl3,83554:down Mgp,17313:up Mmp13,17386:up Sema7a,20361:down Gpm6b,14758:up lbsp,15891:up lgfbp3,16009:up Wnt5a,22418:down Bmpr1a,12166:down Stc1,20855:up Bmp4,12159:up lglf1,16000:up Ank,11732:down Tnc,21923:down Creb3l1,26427:down Fgfr2,14183:up Mrc2,17534:down Fam101b,76566:down Cthrc1,68588:down Lrrc1,74511:down Aspn,66695:down Vegfa,22339:down Mmp2,17390:down lglf2,16002:up Tnf,21926:up Alpl,11647:up Fgfr1,14182:down Sfrp1,20377:up Tgfb3,21814:up Ptgs2,19225:down Grem1,23892:up Sfrp2,20319:up Rspo2,239405:up Npnt,114249:up Enpp1,18605:down                                                                                                                                                                                                                                                                                                                                                                                                                                                                                                                                                                                                                                                                                                                                                                                                                                                                                                                                                                                                                                                                                                                                                                                                                                  |
| organ development                                       | GO:0048513 | 4.41E-17 | 2.06E-14 | Fstl3,83554:down Clec2d,93694:up Adm,11535:up Flrt2,399558:down Tmem176b,65963:up Plxnd1,67784:up Ankrd1,107765:down Serpinh1,12406:down Lyl1,17095:up Cx3cr1,13051:down lbsp,15891:up Cd109,235505:down Loxl2,94352:down Loxl3,16950:down Trf,22041:up Cxc14,57266:down Cd24a,12484:down Wnt5a,22418:down Stc1,20855:up Col8a1,12837:down Adipoq,11450:up Bmp4,12159:up lglf1,16000:up Tgfb2,21808:down Hpse,15442:up Fgfr2,14183:up Clec4e,56619:up Cthrc1,68588:down Htr2b,15559:down Efemp1,216616:up Gjb5,14622:down Aspn,66695:down Ninj1,18081:up Vdr,22337:down Cxc12,20315:up Mmp2,17390:down Slc40a1,53945:up Gas6,14456:up Egfr,13649:down Col11a1,12814:down Alpl,11647:up Sfrp1,20377:up Tgfb3,21814:up Tfrc,22042:up Ceacam1,26365:up Sfrp2,20319:up Rspo2,239405:up Fam20a,208659:down Cdsn,386463:up Npnt,114249:up Tnfrsf11b,18383:up Col5a2,12832:down Lyl9,17085:up Aldh1a2,19378:up Pdgc,54635:down Ednrb,13618:up Mgp,17313:up Mmp13,17386:up Sema7a,20361:down Epas1,13819:up Uchl5,56207:up Gpm6b,14758:up Shroom4,208431:down Cdo1,12583:up Ncam1,17967:down Bmpr1a,12166:down Wisp1,22402:down Chst11,58250:down Ank,11732:down Tnc,21923:down Ret,19713:up Prg4,96875:down Vegfb,22340:up Aldh1a3,56847:down Kitl,17311:up Fam101b,76566:down Lrrc1,74511:down Hp,15439:up Ptk7,71461:down Inhba,16323:down Bnc2,242509:down Ccl3,20302:up Ctla2a,13024:down Crfl1,12931:down Vegfa,22339:down Serpine2,20720:up Adamts12,239337:down lglf2,16002:up Pparg,19016:up Tnf,21926:up Tmem176a,66058:up Col1a2,12843:down Fgfr1,14182:down Has2,15117:down Hmox1,15368:up Sulf1,240725:down Cd4,12504:up Ptgs2,19225:down Grem1,23892:up Col3a1,12825:down Pcdh19,279653:down Tbx15,21384:down Mcoln3,171166:up Col5a1,12831:down Errfi1,74155:down Enpp1,18605:down Tnfsf9,21950:up |
| regulation of developmental process                     | GO:0050793 | 5.68E-17 | 2.46E-14 | Fstl3,83554:down Clec2d,93694:up Adm,11535:up Flrt2,399558:down Tmem176b,65963:up Plxnd1,67784:up Sfrp4,20379:up C3,12266:up Ankrd1,107765:down Cx3cr1,13051:down lgfbp3,16009:up Cd109,235505:down Loxl2,94352:down Plk2,20620:down Trf,22041:up Cxc14,57266:down Cd24a,12484:down Wnt5a,22418:down l1rn,16181:up Adipoq,11450:up Bmp4,12159:up lglf1,16000:up Crabp2,12904:down Cxc19,17329:up Tgfb2,21808:down Hpse,15442:up Medag,70717:down Fgfr2,14183:up F3,14066:up Thbs2,21826:down Cthrc1,68588:down Pr1c2,18811:up Efemp1,216616:up Dpysl3,22240:down Aspn,66695:down Vdr,22337:down Cxc12,20315:up Htr2a,15558:down Gas6,14456:up Sfrp1,20377:up Tgfb3,21814:up Tfrc,22042:up Ceacam1,26365:up Ccl8,20307:up Sfrp2,20319:up Rspo2,239405:up Npnt,114249:up Tnfrsf11b,18383:up Col5a2,12832:down Ccl2,20296:up Ednrb,13618:up Mgp,17313:up Sema7a,20361:down Tnfrsf12a,27279:down Gpm6b,14758:up Ddah1,69219:down Postn,50706:down Ncam1,17967:down Ccl12,20293:up Bmpr1a,12166:down Wisp1,22402:down Ank,11732:down Ret,19713:up Kitl,17311:up Fam101b,76566:down Lrrc1,74511:down Ccl9,20308:up Lama2,16773:down Ptk7,71461:down Inhba,16323:down Ccl3,20302:up Ctla2a,13024:down Srp2,68792:down Vegfa,22339:down Serpine2,20720:up Adamts12,239337:down lglf2,16002:up Pparg,19016:up Tnf,21926:up Tmem176a,66058:up Glp1r,14652:down Fgfr1,14182:down Hmox1,15368:up Lpl,16956:up Has2,15117:down Sulf1,240725:down Ptgs2,19225:down Grem1,23892:up Col3a1,12825:down Col5a1,12831:down Errfi1,74155:down Enpp1,18605:down Tnfsf9,21950:up                                                                                                                                                                                                                                                |
| blood vessel development                                | GO:0015168 | 8.90E-17 | 3.60E-14 | Adm,11535:up Hpgd,15446:up Plxnd1,67784:up Ccl2,20296:up Aldh1a2,19378:up C3,12266:up Figf,14205:up Epas1,13819:up Tnfrsf12a,27279:down Ddah1,69219:down Lyl1,17095:up Cx3cr1,13051:down Loxl2,94352:down Wnt5a,22418:down Bmpr1a,12166:down Ccl12,20293:up Col8a1,12837:down Bmp4,12159:up Tgfb2,21808:down Vegfb,22340:up Hpse,15442:up Ppp3,67916:up Fgfr2,14183:up F3,14066:up Thbs2,21826:down Pr1c2,18811:up Ptk7,71461:down Srp2,68792:down Cxc12,20315:up Vegfa,22339:down Mmp2,17390:down Anep,16790:up Col1a2,12843:down Fgfr1,14182:down Hmox1,15368:up Has2,15117:down Sulf1,240725:down Tgfb3,21814:up Ptgs2,19225:down Grem1,23892:up Col3a1,12825:down Ceacam1,26365:up Sfrp2,20319:up Col5a1,12831:down                                                                                                                                                                                                                                                                                                                                                                                                                                                                                                                                                                                                                                                                                                                                                                                                                                                                                                                                                                                                                                                                                   |
| regulation of multicellular organismal development      | GO:2000026 | 1.58E-16 | 5.98E-14 | Fstl3,83554:down Clec2d,93694:up Adm,11535:up Flrt2,399558:down Tmem176b,65963:up Plxnd1,67784:up Sfrp4,20379:up C3,12266:up Ankrd1,107765:down Cx3cr1,13051:down Cd109,235505:down Loxl2,94352:down Plk2,20620:down Trf,22041:up Cd24a,12484:down Wnt5a,22418:down l1rn,16181:up Adipoq,11450:up Bmp4,12159:up lglf1,16000:up Crabp2,12904:down Tgfb2,21808:down Hpse,15442:up Fgfr2,14183:up F3,14066:up Thbs2,21826:down Cthrc1,68588:down Pr1c2,18811:up Efemp1,216616:up Dpysl3,22240:down Aspn,66695:down Vdr,22337:down Cxc12,20315:up Gas6,14456:up Sfrp1,20377:up Tgfb3,21814:up Tfrc,22042:up Ceacam1,26365:up Sfrp2,20319:up Rspo2,239405:up Tnfrsf11b,18383:up Col5a2,12832:down Ccl2,20296:up Ednrb,13618:up Mgp,17313:up Sema7a,20361:down Tnfrsf12a,27279:down Gpm6b,14758:up Ddah1,69219:down Ncam1,17967:down Bmpr1a,12166:down Wisp1,22402:down Ank,11732:down Ret,19713:up Kitl,17311:up Fam101b,76566:down Lrrc1,74511:down Lama2,16773:down Ptk7,71461:down Inhba,16323:down Ccl3,20302:up Ctla2a,13024:down Srp2,68792:down Vegfa,22339:down Serpine2,20720:up Adamts12,239337:down Tnf,21926:up Pparg,19016:up Tmem176a,66058:up Fgfr1,14182:down Hmox1,15368:up Sulf1,240725:down Ptgs2,19225:down Grem1,23892:up Col3a1,12825:down Col5a1,12831:down Errfi1,74155:down Tnfsf9,21950:up                                                                                                                                                                                                                                                                                                                                                                                                                                                                                           |
| positive regulation of multicellular organismal process | GO:0051240 | 1.83E-16 | 6.55E-14 | Adm,11535:up Flrt2,399558:down Sfrp4,20379:up C3,12266:up Ankrd1,107765:down Cx3cr1,13051:down Loxl2,94352:down Trf,22041:up Cd24a,12484:down Wnt5a,22418:down Adipoq,11450:up Bmp4,12159:up lglf1,16000:up Crabp2,12904:down Tgfb2,21808:down Hpse,15442:up Fgfr2,14183:up F3,14066:up Thbs2,21826:down Clec4e,56619:up Cthrc1,68588:down Htr2b,15559:down Pr1c2,18811:up Dpysl3,22240:down Vdr,22337:down Cxc12,20315:up Htr2a,15558:down Gas6,14456:up Egfr,13649:down C1qtnf3,81799:down Tfrc,22042:up Ceacam1,26365:up Sfrp2,20319:up Npnt,114249:up Lyl9,17085:up Ccl2,20296:up Ednrb,13618:up Figf,14205:up Mmp13,17386:up Sema7a,20361:down Tnfrsf12a,27279:down Gpm6b,14758:up Ddah1,69219:down Clec4n,56620:up Postn,50706:down Ncam1,17967:down Bmpr1a,12166:down Wisp1,22402:down Ccl4,20303:up Ret,19713:up Ppp3,67916:up Kitl,17311:up l1rn,17082:down Ptk7,71461:down Inhba,16323:down Ccl3,20302:up Plat,18791:down Srp2,68792:down Vegfa,22339:down Serpine2,20720:up lglf2,16002:up Tnf,21926:up Pparg,19016:up Glp1r,14652:down Fgfr1,14182:down Hmox1,15368:up Lpl,16956:up Has2,15117:down Sulf1,240725:down Ptgs2,19225:down Grem1,23892:up Tnfsf9,21950:up                                                                                                                                                                                                                                                                                                                                                                                                                                                                                                                                                                                                                         |

|                                                          |            |          |          |                                                                                                                                                                                                                                                                                                                                                                                                                                                                                                                                                                                                                                                                                                                                                                                                                                                                                                                                                                                                                                                                                                                                                                                                                                                                                                                                                                                                                                                                                                                                                                                                                                                                                                                                                                                                                                                                                                                                                                                                                                                                                                                                           |
|----------------------------------------------------------|------------|----------|----------|-------------------------------------------------------------------------------------------------------------------------------------------------------------------------------------------------------------------------------------------------------------------------------------------------------------------------------------------------------------------------------------------------------------------------------------------------------------------------------------------------------------------------------------------------------------------------------------------------------------------------------------------------------------------------------------------------------------------------------------------------------------------------------------------------------------------------------------------------------------------------------------------------------------------------------------------------------------------------------------------------------------------------------------------------------------------------------------------------------------------------------------------------------------------------------------------------------------------------------------------------------------------------------------------------------------------------------------------------------------------------------------------------------------------------------------------------------------------------------------------------------------------------------------------------------------------------------------------------------------------------------------------------------------------------------------------------------------------------------------------------------------------------------------------------------------------------------------------------------------------------------------------------------------------------------------------------------------------------------------------------------------------------------------------------------------------------------------------------------------------------------------------|
| system development                                       | GO:0048731 | 3.61E-16 | 1.22E-13 | Fstl3,83554:down Clec2d,93694:up Adm,11535:up Flrt2,399558:down Tmem176b,65963:up Hpgd,15446:up Plxnd1,67784:up C3,12266:up Ankrd1,107765:down Serpinh1,12406:down Lyl1,17095:up Cx3cr1,13051:down lbsp,15891:up Cd109,235505:down Loxl2,94352:down Plk2,20620:down Loxl3,16950:down Trf,22041:up Cycl14,57266:down Cd24a,12484:down Wnt5a,22418:down Mark1,226778:up Stc1,20855:up Col8a1,12837:down lglf1,16000:up Adipoq,11450:up Bmp4,12159:up Crabp2,12904:down Tgfb2,21808:down Hpse,15442:up F3,14066:up Fgfr2,14183:up Thbs2,21826:down Clec4e,56619:up Cthrc1,68588:down Htr2b,15559:down Prl2c2,18811:up Efemp1,216616:up Gjb5,14622:down Dpysl3,22240:down Aspn,66695:down Ninj1,18081:up Vdr,22337:down Cycl12,20315:up Mmp2,17390:down Slc40a1,53945:up Gas6,14456:up Egfr,13649:down Col11a1,12814:down Alpl,11647:up Sfrp1,20377:up Tgfb3,21814:up Tfrc,22042:up Ceacam1,26365:up Sfrp2,20319:up Rspo2,239405:up Fam20a,208659:down Cdsn,386463:up Npnt,114249:up Tnfrsf11b,18383:up Col5a2,12832:down Ly9,17085:up Aldh1a2,19378:up Ccl2,20296:up Pdgfc,54635:down Ednrbl,13618:up Figf,14205:up Mgp,17313:up Mmp13,17386:up Sema7a,20361:down Epas1,13819:up Tnfrsf12a,27279:down Uchl5,56207:up Gpm6b,14758:up Ddah1,69219:down Shroom4,208431:down Postn,50706:down Cdo1,12583:up Ncam1,17967:down Bmpr1a,12166:down Ccl12,20293:up Wispl1,22402:down Chst11,58250:down Ank,11732:down Tnc,21923:down Ret,19713:up Prg4,96875:down Vegfb,22340:up Aldh1a3,56847:down Plpp3,67916:up Kitl,17311:up Fam101b,76566:down Lrrc17,74511:down Lama2,16773:down Hp,15439:up Ptk7,71461:down Inhba,16323:down Bnc2,242509:down Ccl3,20302:up Ctla2a,13024:down Srp2,68792:down Crfl1,12931:down Vegfa,22339:down Serpine2,20720:up Adamts12,239337:down Nxn,18230:down lglf2,16002:up Anpep,16790:up Pparg,19016:up Tnf,21926:up Tmem176a,66058:up Col1a2,12843:down Fgfr1,14182:down Has2,15117:down Hmox1,15368:up Sulf1,240725:down Cd4,12504:up Ptgs2,19225:down Grem1,23892:up Col3a1,12825:down Pcdh19,279653:down Tbx15,21384:down Col5a1,12831:down Mcoln3,171166:up Errfi1,74155:down Enpp1,18605:down Tnfsf9,21950:up |
| positive regulation of intracellular signal transduction | GO:1902533 | 5.89E-16 | 1.86E-13 | lglfbp4,16010:up Ccl7,20306:up Ccl2,20296:up C3,12266:up Pdgfc,54635:down Sema7a,20361:down Ankrd1,107765:down Clec4n,56620:up lglfbp3,16009:up Plk2,20620:down Akr1c18,105349:up Trf,22041:up Cd24a,12484:down Ncam1,17967:down Wnt5a,22418:down Ccl12,20293:up Il1rn,16181:up Ccl4,20303:up Adipoq,11450:up Bmp4,12159:up lglf1,16000:up Tgfb2,21808:down Hpse,15442:up Ptgir,19222:up Fgfr2,14183:up F3,14066:up Kitl,17311:up Htr2b,15559:down Ccl9,20308:up Ccl6,20305:up Ccl3,20302:up Crfl1,12931:down Vegfa,22339:down Htr2a,15558:down lglf2,16002:up Gas6,14456:up Tnf,21926:up Lmcd1,30937:up Fgfr1,14182:down Egfr,13649:down Hmox1,15368:up Clqtgnf3,81799:down Cd4,12504:up Ptgs2,19225:down Grem1,23892:up Col3a1,12825:down Ccl8,20307:up Ceacam1,26365:up Npnt,114249:up Tnfrsf11b,18383:up                                                                                                                                                                                                                                                                                                                                                                                                                                                                                                                                                                                                                                                                                                                                                                                                                                                                                                                                                                                                                                                                                                                                                                                                                                                                                                                              |
| regulation of cell migration                             | GO:0030334 | 6.14E-16 | 1.86E-13 | Flrt2,399558:down Plxnd1,67784:up Ccl2,20296:up Pdgfc,54635:down Figf,14205:up Sema7a,20361:down Postn,50706:down Cx3cr1,13051:down lglfbp3,16009:up Cycl14,57266:down Wnt5a,22418:down Bmpr1a,12166:down Ccl12,20293:up Stc1,20855:up Il1rn,16181:up Ccl4,20303:up Adipoq,11450:up Bmp4,12159:up lglf1,16000:up Cycl9,17329:up Ret,19713:up Tgfb2,21808:down Plpp3,67916:up F3,14066:up Kitl,17311:up Prl2c2,18811:up Lama2,16773:down Efemp1,216616:up Dpysl3,22240:down Srp2,68792:down Cycl12,20315:up Vegfa,22339:down Mmp2,17390:down Lrrc15,74488:down Gas6,14456:up Egfr,13649:down Fgfr1,14182:down Sfrp1,20377:up Has2,15117:down Sulf1,240725:down Tgfb3,21814:up Ptgs2,19225:down Grem1,23892:up Col3a1,12825:down Ceacam1,26365:up Sfrp2,20319:up                                                                                                                                                                                                                                                                                                                                                                                                                                                                                                                                                                                                                                                                                                                                                                                                                                                                                                                                                                                                                                                                                                                                                                                                                                                                                                                                                                            |
| cellular response to chemical stimulus                   | GO:0070887 | 6.60E-16 | 1.91E-13 | Fstl3,83554:down Flrt2,399558:down Hpgd,15446:up Ankrd1,107765:down Gstm1,14871:up Cx3cr1,13051:down lbsp,15891:up Cd109,235505:down Trf,22041:up Cycl14,57266:down Cd24a,12484:down Mme,17380:up Wnt5a,22418:down Il1rn,16181:up lglf1,16000:up Adipoq,11450:up Bmp4,12159:up Cycl9,17329:up Tgfb2,21808:down Ptgir,19222:up Fgfr2,14183:up F3,14066:up Htr2b,15559:down Ccl6,20305:up Aspn,66695:down Saa3,20210:up Vdr,22337:down Fabp4,11770:up Cycl12,20315:up Mmp2,17390:down Slc40a1,53945:up Gas6,14456:up Egfr,13649:down Alpl,11647:up Sfrp1,20377:up Tgfb3,21814:up Tfrc,22042:up Ceacam1,26365:up Ccl8,20307:up Sfrp2,20319:up Gstm1,14862:up Npnt,114249:up Mt1,17748:up Col5a2,12832:down Mrc1,17533:up Aldh1a2,19378:up Ccl2,20296:up Ccl7,20306:up Pdgfc,54635:down Ednrbl,13618:up Figf,14205:up lfit3,15959:up Epas1,13819:up Htra3,78558:down Postn,50706:down Hvcn1,74096:up Akr1c18,105349:up Ccl12,20293:up Bmpr1a,12166:down Ccl4,20303:up Chst11,58250:down Ret,19713:up Sdf2l1,64136:up lfit1,15957:up Creb3l1,26427:down Hp,15439:up Ccl9,20308:up Ptk7,71461:down Inhba,16323:down Ccl3,20302:up Vegfa,22339:down Adamts12,239337:down Lrrc15,74488:down lglf2,16002:up Pparg,19016:up Tnf,21926:up Col1a2,12843:down Fgfr1,14182:down Hmox1,15368:up Has2,15117:down Sulf1,240725:down Grem1,23892:up Col3a1,12825:down Enpp1,18605:down                                                                                                                                                                                                                                                                                                                                                                                                                                                                                                                                                                                                                                                                                                                                                                      |
| regulation of cell motility                              | GO:2000145 | 9.10E-16 | 2.51E-13 | Flrt2,399558:down Plxnd1,67784:up Ccl2,20296:up Pdgfc,54635:down Figf,14205:up Sema7a,20361:down Postn,50706:down Cx3cr1,13051:down lglfbp3,16009:up Trf,22041:up Cycl14,57266:down Wnt5a,22418:down Bmpr1a,12166:down Ccl12,20293:up Stc1,20855:up Il1rn,16181:up Ccl4,20303:up Adipoq,11450:up Bmp4,12159:up lglf1,16000:up Cycl9,17329:up Ret,19713:up Tgfb2,21808:down Plpp3,67916:up F3,14066:up Kitl,17311:up Prl2c2,18811:up Lama2,16773:down Efemp1,216616:up Dpysl3,22240:down Srp2,68792:down Cycl12,20315:up Vegfa,22339:down Mmp2,17390:down Lrrc15,74488:down Gas6,14456:up Egfr,13649:down Fgfr1,14182:down Sfrp1,20377:up Has2,15117:down Sulf1,240725:down Tgfb3,21814:up Ptgs2,19225:down Grem1,23892:up Col3a1,12825:down Ceacam1,26365:up Sfrp2,20319:up                                                                                                                                                                                                                                                                                                                                                                                                                                                                                                                                                                                                                                                                                                                                                                                                                                                                                                                                                                                                                                                                                                                                                                                                                                                                                                                                                               |
| organ morphogenesis                                      | GO:0009887 | 1.10E-15 | 2.78E-13 | Col5a2,12832:down Flrt2,399558:down Plxnd1,67784:up Aldh1a2,19378:up Pdgfc,54635:down Mmp13,17386:up Ankrd1,107765:down Serpinh1,12406:down Uchl5,56207:up Wnt5a,22418:down Bmpr1a,12166:down Stc1,20855:up Col8a1,12837:down Bmp4,12159:up lglf1,16000:up Chst11,58250:down Tnc,21923:down Tgfb2,21808:down Aldh1a3,56847:down Fgfr2,14183:up Fam101b,76566:down Cthrc1,68588:down Htr2b,15559:down Ptk7,71461:down Inhba,16323:down Bnc2,242509:down Aspn,66695:down Vdr,22337:down Vegfa,22339:down Mmp2,17390:down lglf2,16002:up Slc40a1,53945:up Tnf,21926:up Col1a2,12843:down Alpl,11647:up Col11a1,12814:down Egfr,13649:down Fgfr1,14182:down Sfrp1,20377:up Has2,15117:down Sulf1,240725:down Tgfb3,21814:up Grem1,23892:up Col3a1,12825:down Ceacam1,26365:up Sfrp2,20319:up Tbx15,21384:down Col5a1,12831:down Rspo2,239405:up Fam20a,208659:down Tnfrsf11b,18383:up Npnt,114249:up Cdsn,386463:up Errfi1,74155:down                                                                                                                                                                                                                                                                                                                                                                                                                                                                                                                                                                                                                                                                                                                                                                                                                                                                                                                                                                                                                                                                                                                                                                                                         |

|                                      |            |          |          |                                                                                                                                                                                                                                                                                                                                                                                                                                                                                                                                                                                                                                                                                                                                                                                                                                                                                                                                                                                                                                                                                                                                                                                                                                                                                                                                                                                                                   |
|--------------------------------------|------------|----------|----------|-------------------------------------------------------------------------------------------------------------------------------------------------------------------------------------------------------------------------------------------------------------------------------------------------------------------------------------------------------------------------------------------------------------------------------------------------------------------------------------------------------------------------------------------------------------------------------------------------------------------------------------------------------------------------------------------------------------------------------------------------------------------------------------------------------------------------------------------------------------------------------------------------------------------------------------------------------------------------------------------------------------------------------------------------------------------------------------------------------------------------------------------------------------------------------------------------------------------------------------------------------------------------------------------------------------------------------------------------------------------------------------------------------------------|
| circulatory system development       | GO:0072359 | 1.15E-15 | 2.78E-13 | Adm,11535:up Flrt2,399558:down Hpgd,15446:up Plxnd1,67784:up Ccl2,20296:up Aldh1a2,19378:up C3,12266:up Figf,14205:up Mmp13,17386:up Epas1,13819:up Ankrd1,107765:down Tnfrsf12a,27279:down Ddah1,69219:down Lyl1,17095:up Cx3cr1,13051:down Loxl2,94352:down Ncam1,17967:down Wnt5a,22418:down Bmpr1a,12166:down Ccl12,20293:up Wispl,22402:down Col8a1,12837:down Bmp4,12159:up Ggf1,16000:up Tgfb2,21808:down Vegfb,22340:up Hpse,15442:up Ppp3,67916:up Fgfr2,14183:up F3,14066:up Thbs2,21826:down Htr2b,15559:down Prl2c2,18811:up Ptk7,71461:down Sprx2,68792:down Cxcl12,20315:up Vegfa,22339:down Mmp2,17390:down Nxn,18230:down Anpep,16790:up Col1a2,12843:down Fgfr1,14182:down Col11a1,12814:down Has2,15117:down Hmox1,15368:up Sulf1,240725:down Tgfb3,21814:up Ptgs2,19225:down Grem1,23892:up Col3a1,12825:down Ceacam1,26365:up Sfrp2,20319:up Col5a1,12831:down Errfi1,74155:down                                                                                                                                                                                                                                                                                                                                                                                                                                                                                                              |
| cardiovascular system development    | GO:0072358 | 1.15E-15 | 2.78E-13 | Adm,11535:up Flrt2,399558:down Hpgd,15446:up Plxnd1,67784:up Ccl2,20296:up Aldh1a2,19378:up C3,12266:up Figf,14205:up Mmp13,17386:up Epas1,13819:up Ankrd1,107765:down Tnfrsf12a,27279:down Ddah1,69219:down Lyl1,17095:up Cx3cr1,13051:down Loxl2,94352:down Ncam1,17967:down Wnt5a,22418:down Bmpr1a,12166:down Ccl12,20293:up Wispl,22402:down Col8a1,12837:down Bmp4,12159:up Ggf1,16000:up Tgfb2,21808:down Vegfb,22340:up Hpse,15442:up Ppp3,67916:up Fgfr2,14183:up F3,14066:up Thbs2,21826:down Htr2b,15559:down Prl2c2,18811:up Ptk7,71461:down Sprx2,68792:down Cxcl12,20315:up Vegfa,22339:down Mmp2,17390:down Nxn,18230:down Anpep,16790:up Col1a2,12843:down Fgfr1,14182:down Col11a1,12814:down Has2,15117:down Hmox1,15368:up Sulf1,240725:down Tgfb3,21814:up Ptgs2,19225:down Grem1,23892:up Col3a1,12825:down Ceacam1,26365:up Sfrp2,20319:up Col5a1,12831:down Errfi1,74155:down                                                                                                                                                                                                                                                                                                                                                                                                                                                                                                              |
| locomotion                           | GO:0040011 | 1.19E-15 | 2.78E-13 | Flrt2,399558:down Plxnd1,67784:up Cx3cr1,13051:down Gfbbp3,16009:up Loxl2,94352:down Trf,22041:up Cxcl14,57266:down Cd24a,12484:down Ceacam10,26366:up Wnt5a,22418:down Mark1,226778:up Stc1,20855:up Il1rn,16181:up Adipoq,11450:up Bmp4,12159:up Ggf1,16000:up Cxcl9,17329:up Tgfb2,21808:down F3,14066:up Cthrc1,68588:down Htr2b,15559:down Prl2c2,18811:up Efemp1,216616:up Ccl6,20305:up Dpysl3,22240:down Saa3,20210:up Cxcr6,80901:down Cxcl12,20315:up Mmp2,17390:down Gas6,14456:up Egfr,13649:down Sfrp1,20377:up Tgfb3,21814:up Ceacam1,26365:up Ccl8,20307:up Sfrp2,20319:up Ccl2,20296:up Ccl7,20306:up Ednrb,13618:up Figf,14205:up Pdgfc,54635:down Sema7a,20361:down Sord,20322:up Tnfrsf12a,27279:down Postn,50706:down Ptx3,19288:up Ccl12,20293:up Bmpr1a,12166:down Ccl4,20303:up Ret,19713:up Ppp3,67916:up Kitl,17311:up Ccl9,20308:up Lama2,16773:down Ptk7,71461:down Ccl3,20302:up Plat,18791:down Sprx2,68792:down Vegfa,22339:down Adamts12,239337:down Lrrc15,74488:down Tnf,21926:up Fgfr1,14182:down Has2,15117:down Sulf1,240725:down Ptgs2,19225:down Grem1,23892:up Col3a1,12825:down Col5a1,12831:down                                                                                                                                                                                                                                                                         |
| extracellular matrix organization    | GO:0030198 | 1.86E-15 | 4.18E-13 | P4ha1,18451:down Col5a2,12832:down Flrt2,399558:down Mmp13,17386:up Ltp2,16997:down Serpinh1,12406:down Gpm6b,14758:up Postn,50706:down lbsp,15891:up Smoc2,64074:down Tnf,21926:up Loxl2,94352:down Col1a2,12843:down Col11a1,12814:down Has2,15117:down Sulf1,240725:down Grem1,23892:up Col3a1,12825:down Sfrp2,20319:up Pxdn,69675:down Col5a1,12831:down Tgfb2,21808:down Hpse,15442:up Tnfrsf11b,18383:up Npnt,114249:up Creb3l1,26427:down                                                                                                                                                                                                                                                                                                                                                                                                                                                                                                                                                                                                                                                                                                                                                                                                                                                                                                                                                                 |
| extracellular structure organization | GO:0043062 | 2.11E-15 | 4.57E-13 | P4ha1,18451:down Col5a2,12832:down Flrt2,399558:down Mmp13,17386:up Ltp2,16997:down Serpinh1,12406:down Gpm6b,14758:up Postn,50706:down lbsp,15891:up Smoc2,64074:down Tnf,21926:up Loxl2,94352:down Col1a2,12843:down Col11a1,12814:down Has2,15117:down Sulf1,240725:down Grem1,23892:up Col3a1,12825:down Sfrp2,20319:up Pxdn,69675:down Col5a1,12831:down Tgfb2,21808:down Hpse,15442:up Tnfrsf11b,18383:up Npnt,114249:up Creb3l1,26427:down                                                                                                                                                                                                                                                                                                                                                                                                                                                                                                                                                                                                                                                                                                                                                                                                                                                                                                                                                                 |
| response to organic substance        | GO:0010033 | 2.86E-15 | 5.99E-13 | Fstl3,83554:down Adm,11535:up Flrt2,399558:down Hpgd,15446:up Ankrd1,107765:down Cx3cr1,13051:down lbsp,15891:up Ccl109,235505:down Cd24a,12484:down Mme,17380:up Wnt5a,22418:down Il1rn,16181:up Ggf1,16000:up Adipoq,11450:up Bmp4,12159:up Cxcl9,17329:up Tgfb2,21808:down Ptgir,19222:up F3,14066:up Fgfr2,14183:up Htr2b,15559:down Ccl6,20305:up Slpi,20568:up Aspn,66695:down Saa3,20210:up Vdr,22337:down Fabp4,11770:up Cxcl12,20315:up Htr2a,15558:down Mmp2,17390:down Pappa,18491:down Gas6,14456:up Egfr,13649:down Alpl,11647:up Sfrp1,20377:up Tgfb3,21814:up Ceacam1,26365:up Ccl8,20307:up Sfrp2,20319:up Serpina3g,20715:up Npnt,114249:up Tnfrsf11b,18383:up Col5a2,12832:down Mrc1,17533:up Aldh1a2,19378:up Ccl2,20296:up Ccl7,20306:up Pdgfc,54635:down Ednrb,13618:up Figf,14205:up Ftit3,15959:up Htra3,78558:down Sord,20322:up Postn,50706:down Cdo1,12583:up Akr1c18,105349:up Ncam1,17967:down Ccl12,20293:up Bmpr1a,12166:down Ccl4,20303:up Chst11,58250:down Gatm,67092:down Ret,19713:up Sdf2l1,64136:up Ftit1,15957:up Creb3l1,26427:down Ccl9,20308:up Ptk7,71461:down Inhba,16323:down Ccl3,20302:up Vegfa,22339:down Adamts12,239337:down Lrrc15,74488:down Ggf2,16002:up Pparg,19016:up Tnf,21926:up Col1a2,12843:down Glp1r,14652:down Fgfr1,14182:down Hmox1,15368:up Has2,15117:down Sulf1,240725:down Ptgs2,19225:down Grem1,23892:up Col3a1,12825:down Enpp1,18605:down |
| blood vessel morphogenesis           | GO:0048514 | 6.18E-15 | 1.21E-12 | Adm,11535:up Hpgd,15446:up Plxnd1,67784:up Ccl2,20296:up C3,12266:up Figf,14205:up Epas1,13819:up Tnfrsf12a,27279:down Ddah1,69219:down Cx3cr1,13051:down Loxl2,94352:down Wnt5a,22418:down Bmpr1a,12166:down Ccl12,20293:up Col8a1,12837:down Bmp4,12159:up Tgfb2,21808:down Vegfb,22340:up Hpse,15442:up Fgfr2,14183:up F3,14066:up Thbs2,21826:down Prl2c2,18811:up Sprx2,68792:down Cxcl12,20315:up Vegfa,22339:down Mmp2,17390:down Anpep,16790:up Fgfr1,14182:down Hmox1,15368:up Has2,15117:down Sulf1,240725:down Tgfb3,21814:up Ptgs2,19225:down Grem1,23892:up Col3a1,12825:down Ceacam1,26365:up Sfrp2,20319:up                                                                                                                                                                                                                                                                                                                                                                                                                                                                                                                                                                                                                                                                                                                                                                                        |
| regulation of locomotion             | GO:0040012 | 6.75E-15 | 1.21E-12 | Flrt2,399558:down Plxnd1,67784:up Ccl2,20296:up Pdgfc,54635:down Figf,14205:up Sema7a,20361:down Postn,50706:down Cx3cr1,13051:down Gfbbp3,16009:up Trf,22041:up Ptx3,19288:up Cxcl14,57266:down Wnt5a,22418:down Bmpr1a,12166:down Ccl12,20293:up Stc1,20855:up Il1rn,16181:up Ccl4,20303:up Adipoq,11450:up Bmp4,12159:up Ggf1,16000:up Cxcl9,17329:up Ret,19713:up Tgfb2,21808:down Ppp3,67916:up F3,14066:up Kitl,17311:up Prl2c2,18811:up Lama2,16773:down Efemp1,216616:up Dpysl3,22240:down Sprx2,68792:down Cxcl12,20315:up Vegfa,22339:down Mmp2,17390:down Lrrc15,74488:down Gas6,14456:up Egfr,13649:down Fgfr1,14182:down Has2,15117:down Sfrp1,20377:up Sulf1,240725:down Tgfb3,21814:up Ptgs2,19225:down Grem1,23892:up Col3a1,12825:down Ceacam1,26365:up Sfrp2,20319:up                                                                                                                                                                                                                                                                                                                                                                                                                                                                                                                                                                                                                           |

|                                             |            |          |          |                                                                                                                                                                                                                                                                                                                                                                                                                                                                                                                                                                                                                                                                                                                                                                                                                                                                                                                                                                                                                                                                                                                                                                                                                                                                                                                                                                                                                                                                                                                                                                       |
|---------------------------------------------|------------|----------|----------|-----------------------------------------------------------------------------------------------------------------------------------------------------------------------------------------------------------------------------------------------------------------------------------------------------------------------------------------------------------------------------------------------------------------------------------------------------------------------------------------------------------------------------------------------------------------------------------------------------------------------------------------------------------------------------------------------------------------------------------------------------------------------------------------------------------------------------------------------------------------------------------------------------------------------------------------------------------------------------------------------------------------------------------------------------------------------------------------------------------------------------------------------------------------------------------------------------------------------------------------------------------------------------------------------------------------------------------------------------------------------------------------------------------------------------------------------------------------------------------------------------------------------------------------------------------------------|
| positive regulation of cell proliferation   | GO:0008284 | 6.77E-15 | 1.21E-12 | Adm,11535:up Ccl2,20296:up Aldh1a2,19378:up Pdgfc,54635:down Figf,14205:up Ednrb,13618:up Cx3cr1,13051:down Akr1c18,105349:up Trf,22041:up Cd24a,12484:down Ncam1,17967:down Wnt5a,22418:down Bmpr1a,12166:down Wisp1,22402:down Bmp4,12159:up Igf1,16000:up Tnc,21923:down Tgfb2,21808:down Hpse,15442:up Fgfr2,14183:up F3,14066:up Kitl,17311:up Cthrc1,68588:down Htr2b,15559:down Prl2c2,18811:up Efemp1,216616:up Fabp4,11770:up Crlf1,12931:down Cxcl12,20315:up Vegfa,22339:down Htr2a,15558:down Mmp2,17390:down Igf2,16002:up Gas6,14456:up Tnf,21926:up Glp1r,14652:down Fgfr1,14182:down Egfr,13649:down Has2,15117:down Hmox1,15368:up Sfrp1,20377:up Cd4,12504:up Tgfb3,21814:up Ptgs2,19225:down Tfrc,22042:up Grem1,23892:up Ceacam1,26365:up Sfrp2,20319:up Tnfrsf9,21950:up                                                                                                                                                                                                                                                                                                                                                                                                                                                                                                                                                                                                                                                                                                                                                                         |
| anatomical structure morphogenesis          | GO:0009653 | 8.91E-15 | 1.55E-12 | Adm,11535:up Flrt2,399558:down Hpgd,15446:up Plxnd1,67784:up C3,12266:up Ankrd1,107765:down Serpinh1,12406:down Cx3cr1,13051:down Cd109,235505:down Loxl2,94352:down Loxl3,16950:down Wnt5a,22418:down Stc1,20855:up Il1rn,16181:up Col8a1,12837:down Adipoq,11450:up Bmp4,12159:up Igf1,16000:up Crabp2,12904:down Cxcl9,17329:up Tgfb2,21808:down Hpse,15442:up Fgfr2,14183:up F3,14066:up Thbs2,21826:down Cthrc1,68588:down Htr2b,15559:down Prl2c2,18811:up Gjb5,14622:down Aspn,66695:down Ninj1,18081:up Vdr,22337:down Cxcl12,20315:up Mmp2,17390:down Slc40a1,53945:up Egfr,13649:down Col11a1,12814:down Alpl,11647:up Sfrp1,20377:up Tgfb3,21814:up Ceacam1,26365:up Ccl8,20307:up Sfrp2,20319:up Rspo2,239405:up Fam20a,208659:down Cdsn,386463:up Npnt,114249:up Tnfrsf11b,18383:up Col5a2,12832:down Aldh1a2,19378:up Ccl2,20296:up Pdgfc,54635:down Figf,14205:up Mgp,17313:up Mmp13,17386:up Sema7a,20361:down Epas1,13819:up Tnfrsf12a,27279:down Uchl5,56207:up Ddah1,69219:down Postn,50706:down Ccl12,20293:up Bmpr1a,12166:down Chst11,58250:down Tnc,21923:down Ret,19713:up Vegfb,22340:up Aldh1a3,56847:down Ppp3,67916:up Fam101b,76566:down Lama2,16773:down Ptk7,71461:down Inhba,16323:down Bnc2,242509:down Ccl3,20302:up Sprx2,68792:down Vegfa,22339:down Serpine2,20720:up Adamts12,239337:down Igf2,16002:up Anpep,16790:up Tnf,21926:up Col1a2,12843:down Fgfr1,14182:down Hmox1,15368:up Has2,15117:down Sulf1,240725:down Ptgs2,19225:down Grem1,23892:up Col3a1,12825:down Tbx15,21384:down Col5a1,12831:down Errfi1,174155:down |
| positive regulation of response to stimulus | GO:0048584 | 9.66E-15 | 1.61E-12 | Igf1,16000:up Sfrp4,20379:up C3,12266:up Ankrd1,107765:down Igf1,16000:up Plk2,20620:down Trf,22041:up Cxcl14,57266:down Cd24a,12484:down Wnt5a,22418:down Il1rn,16181:up Adipoq,11450:up Bmp4,12159:up Igf1,16000:up Cxcl9,17329:up Tgfb2,21808:down Hpse,15442:up Ptgir,19222:up Fgfr2,14183:up F3,14066:up Htr2b,15559:down Ccl6,20305:up Fabp4,11770:up Cxcl12,20315:up Htr2a,15558:down Mmp2,17390:down Gas6,14456:up Egfr,13649:down Sfrp1,20377:up C1qtnf3,81799:down Tgfb3,21814:up C1rb,667277:up Tfrc,22042:up Ceacam1,26365:up Ccl8,20307:up Sfrp2,20319:up Rspo2,239405:up Npnt,114249:up Tnfrsf11b,18383:up Ccl2,20296:up Ccl7,20306:up Pdgfc,54635:down Figf,14205:up Sema7a,20361:down Tnfrsf12a,27279:down Clec4n,56620:up Akr1c18,105349:up Ncam1,17967:down Ccl12,20293:up Bmpr1a,12166:down Ccl4,20303:up C1s2,317677:up Aldh1a3,56847:down Ppp3,67916:up Kitl,17311:up Il1rl1,17082:down Ccl9,20308:up Inhba,16323:down Ccl3,20302:up C1s1,50908:up Crlf1,12931:down Vegfa,22339:down Igf2,16002:up Tnf,21926:up Lmcd1,30937:up Fgfr1,14182:down Hmox1,15368:up Sulf1,240725:down Cd4,12504:up Ptgs2,19225:down Grem1,23892:up Col3a1,12825:down Serping1,12258:up                                                                                                                                                                                                                                                                                                                                                                                |
| tissue development                          | GO:0009888 | 9.81E-15 | 1.61E-12 | Adm,11535:up Plxnd1,67784:up Sfrp4,20379:up Ankrd1,107765:down Serpinh1,12406:down Ibsp,15891:up Cd109,235505:down Loxl2,94352:down Loxl3,16950:down Wnt5a,22418:down Stc1,20855:up Adipoq,11450:up Bmp4,12159:up Igf1,16000:up Tgfb2,21808:down Hpse,15442:up Fgfr2,14183:up Cthrc1,68588:down Htr2b,15559:down Efemp1,216616:up Gjb5,14622:down Aspn,66695:down Ninj1,18081:up Vdr,22337:down Cxcl12,20315:up Mmp2,17390:down Slc40a1,53945:up Gas6,14456:up Egfr,13649:down Col11a1,12814:down Sfrp1,20377:up Tgfb3,21814:up Ceacam1,26365:up Sfrp2,20319:up Rspo2,239405:up Fam20a,208659:down Npnt,114249:up Col5a2,12832:down Aldh1a2,19378:up Ednrb,13618:up Mgp,17313:up Mmp13,17386:up Sema7a,20361:down Gpm6b,14758:up Postn,50706:down Ncam1,17967:down Bmpr1a,12166:down Wisp1,22402:down Chst11,58250:down Ank,11732:down Tnc,21923:down Ret,19713:up Aldh1a3,56847:down Kitl,17311:up Fam101b,76566:down Lrrc17,74511:down Ptk7,71461:down Inhba,16323:down Bnc2,242509:down Crlf1,12931:down Vegfa,22339:down Serpine2,20720:up Adamts12,239337:down Tnf,21926:up Pparg,19016:up Fgfr1,14182:down Has2,15117:down Sulf1,240725:down Ptgs2,19225:down Grem1,23892:up Col3a1,12825:down Mcoln3,171166:up Col5a1,12831:down Errfi1,174155:down Enpp1,18605:down                                                                                                                                                                                                                                                                                           |
| regulation of cellular component movement   | GO:0051270 | 1.02E-14 | 1.63E-12 | Flrt2,399558:down Plxnd1,67784:up Ccl2,20296:up Pdgfc,54635:down Figf,14205:up Sema7a,20361:down Postn,50706:down Cx3cr1,13051:down Igf1,16000:up Tgfb2,21808:down Wnt5a,22418:down Bmpr1a,12166:down Ccl12,20293:up Stc1,20855:up Il1rn,16181:up Ccl4,20303:up Adipoq,11450:up Bmp4,12159:up Igf1,16000:up Cxcl9,17329:up Ret,19713:up Tgfb2,21808:down Ppp3,67916:up F3,14066:up Kitl,17311:up Prl2c2,18811:up Lama2,16773:down Efemp1,216616:up Dpysl3,22240:down Sprx2,68792:down Cxcl12,20315:up Vegfa,22339:down Mmp2,17390:down Lrrc15,74488:down Gas6,14456:up Fxyd1,56188:up Egfr,13649:down Fgfr1,14182:down Has2,15117:down Sfrp1,20377:up Sulf1,240725:down Tgfb3,21814:up Ptgs2,19225:down Grem1,23892:up Col3a1,12825:down Ceacam1,26365:up Sfrp2,20319:up                                                                                                                                                                                                                                                                                                                                                                                                                                                                                                                                                                                                                                                                                                                                                                                              |
| immune response                             | GO:0006955 | 1.07E-14 | 1.67E-12 | Clec2d,93694:up Adm,11535:up Ly9,17085:up Mrc1,17533:up Ccl7,20306:up Ccl2,20296:up C3,12266:up Igf1,16000:up Sema7a,20361:down Clec4n,56620:up Cx3cr1,13051:down Enpp3,209558:down Ptx3,19288:up Cxcl14,57266:down Cd24a,12484:down Wnt5a,22418:down Bmpr1a,12166:down Ccl12,20293:up Ccl4,20303:up Cxcl9,17329:up Oasl1,231655:up Prg4,96875:down Tgfb2,21808:down C1s2,317677:up Igf1,16000:up Il1rl1,17082:down Clec4e,56619:up Ccl9,20308:up Ccl6,20305:up Slpi,20568:up Ccl3,20302:up C1s1,50908:up Cxcl12,20315:up Vegfa,22339:down Phf11a,219131:up Mmp2,17390:down Oas3,246727:up Igf2,16002:up Pparg,19016:up Gas6,14456:up Tnf,21926:up Hmox1,15368:up Susd2,71733:up Cd4,12504:up Tgfb3,21814:up C1rb,667277:up Tfrc,22042:up Col3a1,12825:down Ccl8,20307:up Ceacam1,26365:up Serping1,12258:up Serpina3g,20715:up Tnfrsf11b,18383:up Enpp1,18605:down Tnfrsf9,21950:up                                                                                                                                                                                                                                                                                                                                                                                                                                                                                                                                                                                                                                                                                  |

|                                            |            |          |          |                                                                                                                                                                                                                                                                                                                                                                                                                                                                                                                                                                                                                                                                                                                                                                                                                                                                                                                                                                                                                                                                                                                                                                                                                                                                                                                                                                                                                                                                                                                                                                                                                                                                                                                                                                                                                                                                                                                                                                                                                                                                                                                                                                                                                                                           |
|--------------------------------------------|------------|----------|----------|-----------------------------------------------------------------------------------------------------------------------------------------------------------------------------------------------------------------------------------------------------------------------------------------------------------------------------------------------------------------------------------------------------------------------------------------------------------------------------------------------------------------------------------------------------------------------------------------------------------------------------------------------------------------------------------------------------------------------------------------------------------------------------------------------------------------------------------------------------------------------------------------------------------------------------------------------------------------------------------------------------------------------------------------------------------------------------------------------------------------------------------------------------------------------------------------------------------------------------------------------------------------------------------------------------------------------------------------------------------------------------------------------------------------------------------------------------------------------------------------------------------------------------------------------------------------------------------------------------------------------------------------------------------------------------------------------------------------------------------------------------------------------------------------------------------------------------------------------------------------------------------------------------------------------------------------------------------------------------------------------------------------------------------------------------------------------------------------------------------------------------------------------------------------------------------------------------------------------------------------------------------|
| immune system process                      | GO:0002376 | 1.16E-14 | 1.72E-12 | Fstl3,83554:down Clec2d,93694:up Adm,11535:up Tmem176b,65963:up C3,12266:up Lyl1,17095:up Cx3cr1,13051:down Cd109,235505:down Trf,22041:up Cxcl14,57266:down Cd24a,12484:down Wnt5a,22418:down Igf1,16000:up Adipoq,11450:up Bmp4,12159:up Cxcl9,17329:up Oasl1,231655:up Tgfb2,21808:down Fgfr2,14183:up Clec4e,56619:up Ccl6,20305:up Slpi,20568:up Cxcl12,20315:up Pfh11a,219131:up Mmp2,17390:down Oas3,246727:up Slc40a1,53945:up Gas6,14456:up Sfrp1,20377:up Tgfb3,21814:up C1rb,667277:up Tfrc,22042:up Ceacam1,26365:up Ccl8,20307:up Sfrp2,20319:up Serpina3g,20715:up Tnfrsf11b,18383:up Ly9,17085:up Mrc1,17533:up Ccl2,20296:up Ccl7,20306:up Ednrb,13618:up Figf,14205:up Ampd3,11717:up Iffit3,15959:up Sema7a,20361:down Epas1,13819:up Clec4n,56620:up Enpp3,209558:down Ptx3,19288:up Ccl12,20293:up Bmpr1a,12166:down Ccl4,20303:up Ret,19713:up Prg4,96875:down C1s2,317677:up Iffit1,15957:up Il1r1,17082:down Kitl,17311:up Lrrc17,74511:down Hp,15439:up Ccl9,20308:up Inhba,16323:down Ccl3,20302:up Ctla2a,13024:down C1s1,50908:up Vegfa,22339:down Igf2,16002:up Pparg,19016:up Tnf,21926:up Tmem176a,66058:up Lmcd1,30937:up Hmox1,15368:up Cd4,12504:up Susd2,71733:up Grem1,23892:up Col3a1,12825:down Serping1,12258:up Enpp1,18605:down Tnfsf9,21950:up                                                                                                                                                                                                                                                                                                                                                                                                                                                                                                                                                                                                                                                                                                                                                                                                                                                                                                                                                                   |
| multicellular organismal development       | GO:0007275 | 1.43E-14 | 2.07E-12 | Fstl3,83554:down Adm,11535:up Flrt2,399558:down Tmem176b,65963:up Plxnd1,67784:up Sfrp4,20379:up Serpinh1,12406:down Lyl1,17095:up Ibsp,15891:up Plk2,20620:down Cd24a,12484:down Il1rn,16181:up Bmp4,12159:up Hpse,15442:up Fgfr2,14183:up Thbs2,21826:down Htr2b,15559:down Gjb5,14622:down Aspn,66695:down Mmp2,17390:down Slc40a1,53945:up Egfr,13649:down Alpl,11647:up Tfrc,22042:up Rspo2,239405:up Fam20a,208659:down Cdsn,386463:up Col5a2,12832:down Aldh1a2,19378:up Ccl2,20296:up Ednrb,13618:up Mmp13,17386:up Tnfrsf12a,27279:down Uchl5,56207:up Shroom4,208431:down Cdo1,12583:up Csrp2,13008:down Ncam1,17967:down Chst11,58250:down Tmeff1,230157:down Vegf1,22340:up Aldh1a3,56847:down Plpp3,67916:up Lrrc17,74511:down Lama2,16773:down Ptk7,71461:down Inhba,16323:down Bnc2,242509:down Crlf1,12931:down Vegfa,22339:down Serpine2,20720:up Nxn,18230:down Igf2,16002:up Tnf,21926:up Tmem176a,66058:up Col1a2,12843:down Fgfr1,14182:down Sulf1,240725:down Cd4,12504:up Col3a1,12825:down Tbx15,21384:down Enpp1,18605:down Clec2d,93694:up Hpgd,15446:up C3,12266:up Ankrd1,107765:down Cx3cr1,13051:down Cd109,235505:down Trf,22041:up Loxl3,16950:down Loxl2,94352:down Cxcl14,57266:down Wnt5a,22418:down Stc1,20855:up Mark1,226778:up Col8a1,12837:down Adipoq,11450:up Igf1,16000:up Crabp2,12904:down Tgfb2,21808:down F3,14066:up Clec4e,56619:up Prl2c2,18811:up Cthrc1,68588:down Efemp1,216616:up Dpysl3,22240:down Ninj1,18081:up Vdr,22337:down Cxcl12,20315:up Gas6,14456:up Col11a1,12814:down Sfrp1,20377:up Tgfb3,21814:up Tll1,21892:down Ceacam1,26365:up Sfrp2,20319:up Tnfrsf11b,18383:up Npnt,114249:up Ly9,17085:up Mgp,17313:up Figf,14205:up Pdgrc,54635:down Epas1,13819:up Sema7a,20361:down Gpm6b,14758:up Ddah1,69219:down Postn,50706:down Ccl12,20293:up Bmpr1a,12166:down Wisp1,22402:down Ank,11732:down Tnc,21923:down Ret,19713:up Sdf2l1,64136:up Prg4,96875:down Creb3l1,26427:down Kitl,17311:up Fam101b,76566:down Hp,15439:up Ccl3,20302:up Ctla2a,13024:down Srp2,68792:down Adamts12,239337:down Anpep,16790:up Pparg,19016:up Hmox1,15368:up Has2,15117:down Ptgs2,19225:down Grem1,23892:up Pcdh19,279653:down Mcoln3,171166:up Col5a1,12831:down Errf1,74155:down Tnfsf9,21950:up |
| positive regulation of signal transduction | GO:0009967 | 1.47E-14 | 2.07E-12 | Igfbp4,16010:up Sfrp4,20379:up Ccl7,20306:up Ccl2,20296:up C3,12266:up Pdgrc,54635:down Sema7a,20361:down Ankrd1,107765:down Tnfrsf12a,27279:down Clec4n,56620:up Igf3,16009:up Plk2,20620:down Akr1c18,105349:up Trf,22041:up Cd24a,12484:down Ncam1,17967:down Wnt5a,22418:down Bmpr1a,12166:down Ccl12,20293:up Il1rn,16181:up Ccl4,20303:up Adipoq,11450:up Bmp4,12159:up Igf1,16000:up Tgfb2,21808:down Hpse,15442:up Aldh1a3,56847:down Ptgir,19222:up Fgfr2,14183:up F3,14066:up Kitl,17311:up Htr2b,15559:down Ccl9,20308:up Ccl6,20305:up Inhba,16323:down Ccl3,20302:up Crlf1,12931:down Vegfa,22339:down Htr2a,15558:down Igf2,16002:up Gas6,14456:up Tnf,21926:up Lmcd1,30937:up Fgfr1,14182:down Egfr,13649:down Hmox1,15368:up Sfrp1,20377:up Sulf1,240725:down C1qtnf3,81799:down Cd4,12504:up Tgfb3,21814:up Ptgs2,19225:down Grem1,23892:up Col3a1,12825:down Ceacam1,26365:up Ccl8,20307:up Sfrp2,20319:up Rspo2,239405:up Npnt,114249:up Tnfrsf11b,18383:up                                                                                                                                                                                                                                                                                                                                                                                                                                                                                                                                                                                                                                                                                                                                                                                                                                                                                                                                                                                                                                                                                                                                                                                                                                                                            |
| regulation of cell differentiation         | GO:0045595 | 1.54E-14 | 2.13E-12 | Fstl3,83554:down Clec2d,93694:up Adm,11535:up Flrt2,399558:down Tmem176b,65963:up Plxnd1,67784:up Sfrp4,20379:up Ankrd1,107765:down Cx3cr1,13051:down Igf3,16009:up Cd109,235505:down Loxl2,94352:down Plk2,20620:down Trf,22041:up Cxcl14,57266:down Cd24a,12484:down Wnt5a,22418:down Adipoq,11450:up Bmp4,12159:up Igf1,16000:up Crabp2,12904:down Cxcl9,17329:up Tgfb2,21808:down Medag,70717:down Fgfr2,14183:up Cthrc1,68588:down Prl2c2,18811:up Efemp1,216616:up Dpysl3,22240:down Vdr,22337:down Cxcl12,20315:up Htr2a,15558:down Gas6,14456:up Sfrp1,20377:up Tgfb3,21814:up Ccl8,20307:up Ceacam1,26365:up Sfrp2,20319:up Npnt,114249:up Col5a2,12832:down Ednrb,13618:up Sema7a,20361:down Tnfrsf12a,27279:down Postn,50706:down Bmpr1a,12166:down Wisp1,22402:down Ret,19713:up Kitl,17311:up Fam101b,76566:down Lrrc17,74511:down Ccl9,20308:up Inhba,16323:down Ptk7,71461:down Ccl3,20302:up Ctla2a,13024:down Vegfa,22339:down Serpine2,20720:up Adamts12,239337:down Tmem176a,66058:up Tnf,21926:down Pparg,19016:up Glp1r,14652:down Alpl,11647:up Sfrp1,20377:up Lpl,16956:up Has2,15117:down Ptgs2,19225:down Grem1,23892:up Col3a1,12825:down Col5a1,12831:down Enpp1,18605:down Errf1,74155:down Tnfsf9,21950:up                                                                                                                                                                                                                                                                                                                                                                                                                                                                                                                                                                                                                                                                                                                                                                                                                                                                                                                                                                                                                   |
| cellular response to organic substance     | GO:0071310 | 1.76E-14 | 2.37E-12 | Fstl3,83554:down Flrt2,399558:down Hpgd,15446:up Ankrd1,107765:down Cx3cr1,13051:down Ibsp,15891:up Cd109,235505:down Cd24a,12484:down Mme,17380:up Wnt5a,22418:down Il1rn,16181:up Adipoq,11450:up Bmp4,12159:up Igf1,16000:up Cxcl9,17329:up Tgfb2,21808:down Ptgir,19222:up Fgfr2,14183:up F3,14066:up Htr2b,15559:down Ccl6,20305:up Aspn,66695:down Saa3,20210:up Vdr,22337:down Fap4,11770:up Cxcl12,20315:up Mmp2,17390:down Gas6,14456:up Egfr,13649:down Alpl,11647:up Sfrp1,20377:up Tgfb3,21814:up Ceacam1,26365:up Ccl8,20307:up Sfrp2,20319:up Npnt,114249:up Col5a2,12832:down Mrc1,17533:up Aldh1a2,19378:up Ccl2,20296:up Ccl7,20306:up Figf,14205:up Pdgrc,54635:down Iffit3,15959:up Htra3,78558:down Akr1c18,105349:up Ccl12,20293:up Bmpr1a,12166:down Ccl4,20303:up Chst11,58250:down Ret,19713:up Sdf2l1,64136:up Iffit1,15957:up Creb3l1,26427:down Ccl9,20308:up Inhba,16323:down Ptk7,71461:down Ccl3,20302:up Vegfa,22339:down Adamts12,239337:down Igf2,16002:up Lrrc15,74488:down Pparg,19016:up Tnf,21926:up Col1a2,12843:down Fgfr1,14182:down Has2,15117:down Sulf1,240725:down Grem1,23892:up Col3a1,12825:down Enpp1,18605:down                                                                                                                                                                                                                                                                                                                                                                                                                                                                                                                                                                                                                                                                                                                                                                                                                                                                                                                                                                                                                                                                                          |

|                                              |            |          |          |                                                                                                                                                                                                                                                                                                                                                                                                                                                                                                                                                                                                                                                                                                                                                                                                                                                                                                                                                                                                                                                                                                                                                                                                                                                                                                                                                                                                                                                                                                                                                                                                                                                                                                                                                                                                                                                                                                                                                                                                                                                                                                                                                                                                                                                                                                                                                                                                                                                                                                                                                                                                                                  |
|----------------------------------------------|------------|----------|----------|----------------------------------------------------------------------------------------------------------------------------------------------------------------------------------------------------------------------------------------------------------------------------------------------------------------------------------------------------------------------------------------------------------------------------------------------------------------------------------------------------------------------------------------------------------------------------------------------------------------------------------------------------------------------------------------------------------------------------------------------------------------------------------------------------------------------------------------------------------------------------------------------------------------------------------------------------------------------------------------------------------------------------------------------------------------------------------------------------------------------------------------------------------------------------------------------------------------------------------------------------------------------------------------------------------------------------------------------------------------------------------------------------------------------------------------------------------------------------------------------------------------------------------------------------------------------------------------------------------------------------------------------------------------------------------------------------------------------------------------------------------------------------------------------------------------------------------------------------------------------------------------------------------------------------------------------------------------------------------------------------------------------------------------------------------------------------------------------------------------------------------------------------------------------------------------------------------------------------------------------------------------------------------------------------------------------------------------------------------------------------------------------------------------------------------------------------------------------------------------------------------------------------------------------------------------------------------------------------------------------------------|
| regulation of cell proliferation             | GO:0042127 | 1.95E-14 | 2.57E-12 | Adm,11535:up Sfrp4,20379:up Cx3cr1,13051:down Igf1,16009:up Cd109,235505:down Trf,22041:up Cd24a,12484:down Wnt5a,22418:down Adipoq,11450:up Bmp4,12159:up Igf1,16000:up Cxl9,17329:up Tgfb2,21808:down Hspse,15442:up Ptgir,19222:up Fgfr2,14183:up F3,14066:up Cthrc1,68588:down Htr2b,15559:down Prl2c2,18811:up Efemp1,216616:up Vdr,22337:down Fabp4,11770:up Cxl12,20315:up Htr2a,15558:down Mmp2,17390:down Gas6,14456:up Egfr,13649:down Sfrp1,20377:up Tgfb3,21814:up Tfrc2,2042:up Ceacam1,26365:up Sfrp2,20319:up Tnfrsf11b,18383:up Aldh1a2,19378:up Ccl2,20296:up Ednrb,13618:up Figf,14205:up Pdgfc,54635:down Akr1c18,105349:up Ncam1,17967:down Ccl12,20293:up Bmpr1a,12166:down Wisp1,22402:down Chst11,58250:down Tnc,21923:down Prg4,96875:down Kitl,17311:up Il1r1,17082:down Inhba,16323:down Crif1,12931:down Vegfa,22339:down Serpine2,20720:up Igf2,16002:up Tnf,21926:up Pparg,19016:up Glp1r,14652:down Fgfr1,14182:down Hmox1,15368:up Has2,15117:down Sulf1,240725:down Cd4,12504:up Ptgs2,19225:down Grem1,23892:up Errfi1,74155:down Tnfsf9,21950:up                                                                                                                                                                                                                                                                                                                                                                                                                                                                                                                                                                                                                                                                                                                                                                                                                                                                                                                                                                                                                                                                                                                                                                                                                                                                                                                                                                                                                                                                                                                                               |
| response to cytokine                         | GO:0034097 | 2.24E-14 | 2.90E-12 | Frt2,399558:down Mrc1,17533:up Ccr7,20506:up Ccl2,20296:up Aldh1a2,19378:up Mts,15959:up Ankrd1,107765:down Cx3cr1,13051:down Cd24a,12484:down Mme,17380:up Wnt5a,22418:down Ccl12,20293:up Il1rn,16181:up Ccl4,20303:up Adipoq,11450:up Cxl9,17329:up Ifit1,15957:up F3,14066:up Ccl9,20308:up Ccl6,20305:up Aspn,66695:down Ccl3,20302:up Saa3,20210:up Fabp4,11770:up Cxl12,20315:up Adamts12,239337:down Lrrc15,74488:down Pparg,19016:up Gas6,14456:up Tnf,21926:up Sfrp1,20377:up Ptgs2,19225:down Col3a1,12825:down Ccl8,20307:up Ceacam1,26365:up Serpina3g,20715:up Npnt,114249:up                                                                                                                                                                                                                                                                                                                                                                                                                                                                                                                                                                                                                                                                                                                                                                                                                                                                                                                                                                                                                                                                                                                                                                                                                                                                                                                                                                                                                                                                                                                                                                                                                                                                                                                                                                                                                                                                                                                                                                                                                                      |
| single-multicellular organism process        | GO:0044707 | 2.89E-14 | 3.66E-12 | Fstl3,83554:down Adm,11535:up Frt2,399558:down Tmem176b,65963:up Plxnd1,67784:up Sfrp4,20379:up Serpinh1,12406:down Lyl1,17095:up Igf1,16009:up Ibsp,15891:up Plk2,20620:down Cd24a,12484:down Mme,17380:up Il1rn,16181:up Bmp4,12159:up Hspse,15442:up Fgfr2,14183:up Thbs2,21826:down Htr2b,15559:down Gjb5,14622:down Anxa8,11752:down Aspn,66695:down Mmp2,17390:down Slc40a1,53945:up Egfr,13649:down Alpl,11647:up Tfrc2,22042:up Sncg,20618:up Rspo2,239405:up Fam20a,208659:down Cdsn,386463:up Col5a2,12832:down Aldh1a2,19378:up Ccl2,20296:up Ednrb,13618:up Ampd3,11717:up Mmp13,17386:up Tnfrsf12a,27279:down Uchl5,56207:up Clec4n,56620:up Shroom4,208431:down Cdo1,12583:up Csrp2,13008:down Ncam1,17967:down Ccl4,20303:up Chst11,58250:down Tmeff1,230157:down Vegfb,22340:up Aldh1a3,56847:down Ppp3,67916:up Mrc2,17534:down Lrrc17,74511:down Lama2,16773:down Ptk7,71461:down Inhba,16323:down Bnc2,242509:down Tfpi2,21789:down Crif1,12931:down Vegfa,22339:down Serpine2,20720:up Nxn,18230:down Igf2,16002:up Tmem176a,66058:up Tnf,21926:up Col1a2,12843:down Fxyd1,56188:up Fgfr1,14182:down Lpl,16956:up Sulf1,240725:down Cd4,12504:up Col3a1,12825:down Tbx15,21384:down Serpig1,12258:up Enpp1,18605:down Clec2d,93694:up Hpgd,15446:up C3,12266:up Ankrd1,107765:down Cx3cr1,13051:down Cd109,235505:down Loxl2,94352:down Trf,22041:up Loxl3,16950:down Cxl14,57266:down Wnt5a,22418:down Stc1,20855:up Mark1,226778:up Col8a1,12837:down Adipoq,11450:up Igf1,16000:up Crabp2,12904:down Tgfb2,21808:down F3,14066:up Clec4e,56619:up Cthrc1,68588:down Kng1,16644:up Prl2c2,18811:up Efemp1,216616:up Dpys3,22240:down Ninj1,18081:up Vdr,22337:down Fabp4,11770:up Cxl12,20315:up Htr2a,15558:down Gas6,14456:up Col11a1,12814:down Sfrp1,20377:up C1qtnf3,81799:down Tgfb3,21814:up Tll1,21892:down Ceacam1,26365:up Sfrp2,20319:up Tnfrsf11b,18383:up Prkar2b,19088:up Npnt,114249:up S100a1,20193:up Ly9,17085:up Pdgfc,54635:down Mgp,17313:up Figf,14205:up Epas1,13819:up Slc29a1,63959:up Sema7a,20361:down Gpm6b,14758:up Ddah1,69219:down Postn,50706:down Ccl12,20293:up Bmpr1a,12166:down Wisp1,22402:down Ank,11732:down Tnc,21923:down Ret,19713:up Prg4,96875:down Sdf2l1,64136:up Creb3l1,26427:down Kitl,17311:up Il1r1,17082:down Fam101b,76566:down Hp,15439:up Ccl3,20302:up Plat,18791:down Ctla2a,13024:down Srxp2,68792:down Adamts12,239337:down Anep,16790:up Pparg,19016:up Lmcd1,30937:up Glp1r,14652:down Hmox1,15368:up Has2,15117:down Ptgs2,19225:down Grem1,23892:up Pcdh19,279653:down Mcoln3,171166:up Col5a1,12831:down Errfi1,74155:down Tnfsf9,21950:up |
| positive regulation of signaling             | GO:0023056 | 3.59E-14 | 4.36E-12 | Igf1,16009:up Sfrp4,20379:up C3,12266:up Ankrd1,107765:down Cx3cr1,13051:down Igf1,16009:up Plk2,20620:down Trf,22041:up Cd24a,12484:down Wnt5a,22418:down Il1rn,16181:up Adipoq,11450:up Bmp4,12159:up Igf1,16000:up Tgfb2,21808:down Hspse,15442:up Ptgir,19222:up Fgfr2,14183:up F3,14066:up Htr2b,15559:down Ccl6,20305:up Htr2a,15558:down Gas6,14456:up Egfr,13649:down Sfrp1,20377:up C1qtnf3,81799:down Tgfb3,21814:up Ceacam1,26365:up Ccl8,20307:up Sfrp2,20319:up Rspo2,239405:up Npnt,114249:up Tnfrsf11b,18383:up Ccl2,20296:up Ccl7,20306:up Pdgfc,54635:down Sema7a,20361:down Tnfrsf12a,27279:down Clec4n,56620:up Akr1c18,105349:up Ncam1,17967:down Ccl12,20293:up Bmpr1a,12166:down Ccl4,20303:up Aldh1a3,56847:down Kitl,17311:up Ccl9,20308:up Lama2,16773:down Inhba,16323:down Ccl3,20302:up Crif1,12931:down Vegfa,22339:down Serpine2,20720:up Igf2,16002:up Tnf,21926:up Lmcd1,30937:up Glp1r,14652:down Fgfr1,14182:down Hmox1,15368:up Cd4,12504:up Sulf1,240725:down Ptgs2,19225:down Grem1,23892:up Col3a1,12825:down                                                                                                                                                                                                                                                                                                                                                                                                                                                                                                                                                                                                                                                                                                                                                                                                                                                                                                                                                                                                                                                                                                                                                                                                                                                                                                                                                                                                                                                                                                                                                                              |
| regulation of response to wounding           | GO:1903034 | 3.88E-14 | 4.62E-12 | Ccl7,20306:up Ccl2,20296:up C3,12266:up Ednrb,13618:up Sema7a,20361:down Tnfrsf12a,27279:down Cx3cr1,13051:down Cd109,235505:down Cd24a,12484:down Wnt5a,22418:down Ccl12,20293:up Ccl4,20303:up Adipoq,11450:up Hspse,15442:up Ppp3,67916:up Il1r1,17082:down Kng1,16644:up Ccl9,20308:up Ccl6,20305:up Aoah,27052:up Ccl3,20302:up Ctla2a,13024:down Fabp4,11770:up Serpine2,20720:up Adamts12,239337:down Pparg,19016:up Tnf,21926:up Egfr,13649:down C1qtnf3,81799:down Ptgs2,19225:down Ccl8,20307:up Ceacam1,26365:up Serpig1,12258:up                                                                                                                                                                                                                                                                                                                                                                                                                                                                                                                                                                                                                                                                                                                                                                                                                                                                                                                                                                                                                                                                                                                                                                                                                                                                                                                                                                                                                                                                                                                                                                                                                                                                                                                                                                                                                                                                                                                                                                                                                                                                                     |
| positive regulation of developmental process | GO:0051094 | 4.00E-14 | 4.66E-12 | Adm,11535:up Frt2,399558:down Sfrp4,20379:up C3,12266:up Sema7a,20361:down Ankrd1,107765:down Tnfrsf12a,27279:down Gpm6b,14758:up Ddah1,69219:down Cx3cr1,13051:down Igf1,16009:up Loxl2,94352:down Trf,22041:up Cd24a,12484:down Ncam1,17967:down Wnt5a,22418:down Bmpr1a,12166:down Wisp1,22402:down Adipoq,11450:up Bmp4,12159:up Igf1,16000:up Crabp2,12904:down Cxl9,17329:up Ret,19713:up Tgfb2,21808:down Hspse,15442:up Medag,70717:down Fgfr2,14183:up F3,14066:up Thbs2,21826:down Kitl,17311:up Cthrc1,68588:down Prl2c2,18811:up Ptk7,71461:down Inhba,16323:down Dpys3,22240:down Ccl3,20302:up Vdr,22337:down Srxp2,68792:down Cxl12,20315:up Vegfa,22339:down Htr2a,15558:down Serpine2,20720:up Igf2,16002:up Gas6,14456:up Pparg,19016:up Tnf,21926:up Glp1r,14652:down Fgfr1,14182:down Lpl,16956:up Hmox1,15368:up Sfrp1,20377:up Ptgs2,19225:down Tfrc2,2042:up Grem1,23892:up Ccl8,20307:up Ceacam1,26365:up Sfrp2,20319:up Npnt,114249:up Tnfsf9,21950:up                                                                                                                                                                                                                                                                                                                                                                                                                                                                                                                                                                                                                                                                                                                                                                                                                                                                                                                                                                                                                                                                                                                                                                                                                                                                                                                                                                                                                                                                                                                                                                                                                                                  |



|                                           |            |          |          |                                                                                                                                                                                                                                                                                                                                                                                                                                                                                                                                                                                                                                                                                                                                                                                                                                                                                                                                                                                                                                                                                                                                                                                                                                                                                                                                                                                                                                                                                                                                                                                                                                                                                                                                                              |
|-------------------------------------------|------------|----------|----------|--------------------------------------------------------------------------------------------------------------------------------------------------------------------------------------------------------------------------------------------------------------------------------------------------------------------------------------------------------------------------------------------------------------------------------------------------------------------------------------------------------------------------------------------------------------------------------------------------------------------------------------------------------------------------------------------------------------------------------------------------------------------------------------------------------------------------------------------------------------------------------------------------------------------------------------------------------------------------------------------------------------------------------------------------------------------------------------------------------------------------------------------------------------------------------------------------------------------------------------------------------------------------------------------------------------------------------------------------------------------------------------------------------------------------------------------------------------------------------------------------------------------------------------------------------------------------------------------------------------------------------------------------------------------------------------------------------------------------------------------------------------|
| response to chemical                      | GO:0042221 | 4.49E-14 | 5.14E-12 | Fstl3,83554:down Adm,11535:up Flrt2,399558:down Hpgd,15446:up Plxnd1,67784:up Ankrd1,107765:down Gstt1,14871:up Cx3cr1,13051:down lbsp,15891:up Cd109,235505:down Loxl2,94352:down Trf,22041:up Cxl14,57266:down Cd24a,12484:down Mme,17380:up Wnt5a,22418:down l1rn,16181:up lglf1,16000:up Adipoq,11450:up Bmp4,12159:up Cxl9,17329:up Tgfb2,21808:down Ptgir,19222:up F3,14066:up Fgfr2,14183:up Htr2b,15559:down Ccl6,20305:up Sipi,20568:up Aspn,66695:down Mrc1,17533:up Saa3,20210:up Vdr,22337:down Cxcr6,80901:down Fabp4,11770:up Cxl12,20315:up Htr2a,15558:down Mmp2,17390:down Pappa,18491:down Slc40a1,53945:up Gas6,14456:up Egfr,13649:down Alpl,11647:up Sfrp1,20377:up Tgfb3,21814:up Tfrc,22042:up Ceacam1,26365:up Ccl8,20307:up Sfrp2,20319:up Gstm1,14862:up Sepina3g,20715:up Npnt,114249:up Tnfrsf11b,18383:up Mt1,17748:up Col5a2,12832:down Mrc1,17533:up Aldh1a2,19378:up Ccl2,20296:up Ccl7,20306:up Pdgfc,54635:down Ednrb,13618:up Figf,14205:up lfit3,15959:up Epas1,13819:up Htra3,78558:down Sord,20322:up Postn,50706:down Cdo1,12583:up Hvcn1,74096:up Akr1c18,105349:up Ncam1,17967:down Ccl12,20293:up Bmpr1a,12166:down Ccl4,20303:up Chst1,158250:down Gatm,67092:down Ret,19713:up Sdf2l1,64136:up lfit1,15957:up Creb3l1,26427:down Lama2,16773:down Hp,15439:up Ccl9,20308:up Ptk7,71461:down Inhba,16323:down Ccl3,20302:up Vegfa,22339:down Adamts12,239337:down Lrrc15,74488:down lglf2,16002:up Pparg,19016:up Tnf,21926:up Glp1r,14652:down Col1a2,12843:down Fgfr1,14182:down Has2,15117:down Hmox1,15368:up Sulf1,240725:down Ptgs2,19225:down Grem1,23892:up Col3a1,12825:down Enpp1,18605:down                                                                                                            |
| cellular response to cytokine stimulus    | GO:0071345 | 5.27E-14 | 5.92E-12 | Flrt2,399558:down Mrc1,17533:up Ccl7,20306:up Ccl2,20296:up lfit3,15959:up Ankrd1,107765:down Cx3cr1,13051:down Cd24a,12484:down Mme,17380:up Wnt5a,22418:down Ccl12,20293:up l1rn,16181:up Ccl4,20303:up Adipoq,11450:up Cxl9,17329:up lfit1,15957:up F3,14066:up Ccl9,20308:up Ccl6,20305:up Ccl3,20302:up Aspn,66695:down Saa3,20210:up Fabp4,11770:up Cxl12,20315:up Lrrc15,74488:down Adamts12,239337:down Pparg,19016:up Gas6,14456:up Tnf,21926:up Sfrp1,20377:up Ccl8,20307:up Ceacam1,26365:up Npnt,114249:up                                                                                                                                                                                                                                                                                                                                                                                                                                                                                                                                                                                                                                                                                                                                                                                                                                                                                                                                                                                                                                                                                                                                                                                                                                       |
| positive regulation of MAPK cascade       | GO:0043410 | 6.21E-14 | 6.85E-12 | lglfbp4,16010:up Ccl7,20306:up Ccl2,20296:up C3,12266:up Pdgfc,54635:down Sema7a,20361:down lglfbp3,16009:up Trf,22041:up Cd24a,12484:down Wnt5a,22418:down Ccl12,20293:up l1rn,16181:up Ccl4,20303:up Bmp4,12159:up lglf1,16000:up Tgfb2,21808:down Fgfr2,14183:up Kitl,17311:up Htr2b,15559:down Ccl9,20308:up Ccl6,20305:up Ccl3,20302:up Htr2a,15558:down Vegfa,22339:down lglf2,16002:up Gas6,14456:up Tnf,21926:up Egfr,13649:down Fgfr1,14182:down C1qtnf3,81799:down Ccl8,20307:up Ceacam1,26365:up Tnfrsf11b,18383:up Npnt,114249:up                                                                                                                                                                                                                                                                                                                                                                                                                                                                                                                                                                                                                                                                                                                                                                                                                                                                                                                                                                                                                                                                                                                                                                                                                |
| positive regulation of cell communication | GO:0010647 | 6.62E-14 | 7.17E-12 | lglfbp4,16010:up Sfrp4,20379:up C3,12266:up Ankrd1,107765:down Cx3cr1,13051:down lglfbp3,16009:up Plk2,20620:down Trf,22041:up Cd24a,12484:down Wnt5a,22418:down l1rn,16181:up Adipoq,11450:up Bmp4,12159:up lglf1,16000:up Tgfb2,21808:down Hpsa,15442:up Ptgir,19222:up Fgfr2,14183:up F3,14066:up Htr2b,15559:down Ccl6,20305:up Htr2a,15558:down Gas6,14456:up Egfr,13649:down Sfrp1,20377:up C1qtnf3,81799:down Tgfb3,21814:up Ceacam1,26365:up Ccl8,20307:up Sfrp2,20319:up Rspo2,239405:up Npnt,114249:up Tnfrsf11b,18383:up Ccl2,20296:up Ccl7,20306:up Pdgfc,54635:down Sema7a,20361:down Tnfrsf12a,27279:down Clec4n,56620:up Akr1c18,105349:up Ncam1,17967:down Ccl12,20293:up Bmpr1a,12166:down Ccl4,20303:up Aldh1a3,56847:down Kitl,17311:up Ccl9,20308:up Lama2,16773:down Inhba,16323:down Ccl3,20302:up Crif1,12931:down Vegfa,22339:down Serpine2,20720:up lglf2,16002:up Tnf,21926:up Lmcd1,30937:up Glp1r,14652:down Fgfr1,14182:down Hmox1,15368:up Cd4,12504:up Sulf1,240725:down Ptgs2,19225:down Grem1,23892:up Col3a1,12825:down                                                                                                                                                                                                                                                                                                                                                                                                                                                                                                                                                                                                                                                                                                    |
| regulation of response to stimulus        | GO:0048583 | 8.58E-14 | 9.06E-12 | Fstl3,83554:down lglfbp4,16010:up Clec2d,93694:up Adm,11535:up Flrt2,399558:down Plxnd1,67784:up Sfrp4,20379:up C3,12266:up Ankrd1,107765:down Cx3cr1,13051:down lglfbp3,16009:up Cd109,235505:down Plk2,20620:down Trf,22041:up Cxl14,57266:down Cd24a,12484:down Wnt5a,22418:down l1rn,16181:up lglf1,16000:up Adipoq,11450:up Bmp4,12159:up Crap2,12904:down Cxl9,17329:up Tgfb2,21808:down Hpsa,15442:up Ptgir,19222:up F3,14066:up Fgfr2,14183:up Clec4e,56619:up Cthrc1,68588:down Htr2b,15559:down Kng1,16644:up Ccl6,20305:up Aspn,66695:down Fabp4,11770:up Cxl12,20315:up Htr2a,15558:down Phf11a,219131:up Mmp2,17390:down Gas6,14456:up Egfr,13649:down Sfrp1,20377:up C1qtnf3,81799:down Tgfb3,21814:up C1rb,667277:up Tfrc,22042:up Ceacam1,26365:up Ccl8,20307:up Sfrp2,20319:up Rspo2,239405:up Npnt,114249:up Tnfrsf11b,18383:up Ccl2,20296:up Ccl7,20306:up Pdgfc,54635:down Ednrb,13618:up Figf,14205:up Sema7a,20361:down Htra3,78558:down Tnfrsf12a,27279:down Clec4n,56620:up Postn,50706:down Akr1c18,105349:up Ncam1,17967:down Ccl12,20293:up Bmpr1a,12166:down Wisp1,22402:down Ccl4,20303:up Chst1,158250:down Ret,19713:up Sdf2l1,64136:up C1s2,317677:up Aldh1a3,56847:down lfit1,15957:up Plpp3,67916:up Creb3l1,26427:down l1r1,17082:down Kitl,17311:up Hp,15439:up Ccl9,20308:up Inhba,16323:down Aoah,27052:up Ccl3,20302:up Ctla2a,13024:down Crif1,12931:down C1s1,50908:up Vegfa,22339:down Serpine2,20720:up Adamts12,239337:down Lrrc15,74488:down Nxn,18230:down lglf2,16002:up Pparg,19016:up Tnf,21926:up Lmcd1,30937:up Tnfrsf23,79201:down Fgfr1,14182:down Hmox1,15368:up Sulf1,240725:down Cd4,12504:up Ptgs2,19225:down Grem1,23892:up Col3a1,12825:down Serpine1,12258:up Errfi1,74155:down Enpp1,18605:down |
| response to stress                        | GO:0006950 | 8.65E-14 | 9.06E-12 | Clec2d,93694:up Adm,11535:up Tfec,21426:up Sfrp4,20379:up C3,12266:up Ankrd1,107765:down Cx3cr1,13051:down Cd109,235505:down Ggt5,23887:up Loxl2,94352:down Trf,22041:up Cd24a,12484:down Wnt5a,22418:down l1rn,16181:up lglf1,16000:up Adipoq,11450:up Bmp4,12159:up Cxl9,17329:up Oas1,231655:up Tgfb2,21808:down Hpsa,15442:up Ptgir,19222:up F3,14066:up Clec4e,56619:up Adamts4,240913:down Kng1,16644:up Ccl6,20305:up Anxa8,11752:down Sipi,20568:up Mt2,17750:up Ninj1,18081:up Saa3,20210:up Cxcr6,80901:down Pdia5,72599:down Fabp4,11770:up Cxl12,20315:up Nabp1,109019:down Mmp2,17390:down Oas3,246727:up Gas6,14456:up Egfr,13649:down Sfrp1,20377:up C1qtnf3,81799:down C1rb,667277:up Ceacam1,26365:up Ccl8,20307:up Sfrp2,20319:up Pxdn,69675:down Tnfrsf11b,18383:up Mt1,17748:up Ly9,17085:up Mrc1,17533:up Ccl2,20296:up Ccl7,20306:up Pdgfc,54635:down Ednrb,13618:up lfit3,15959:up Sema7a,20361:down Epas1,13819:up Tnfrsf12a,27279:down Uchl5,56207:up Clec4n,56620:up Hspb7,29818:up Ptx3,19288:up Akr1c18,105349:up Ncam1,17967:down Bmpr1a,12166:down Ccl12,20293:up Ccl4,20303:up Tnc,21923:down Ret,19713:up C1s2,317677:up Sdf2l1,64136:up lfit1,15957:up Plpp3,67916:up Creb3l1,26427:down l1r1,17082:down Hp,15439:up Ccl9,20308:up Ptk7,71461:down Aoah,27052:up Plat,18791:down Ccl3,20302:up Tfpi2,21789:down Ctla2a,13024:down C1s1,50908:up Plod2,26432:down Vegfa,22339:down Serpine2,20720:up Adamts12,239337:down lglf2,16002:up Pparg,19016:up Tnf,21926:up Glp1r,14652:down Lmcd1,30937:up Hmox1,15368:up Cd4,12504:up Ptgs2,19225:down Col3a1,12825:down Col5a1,12831:down Serpine1,12258:up Errfi1,74155:down                                                                                                    |



|                                                         |            |          |          |                                                                                                                                                                                                                                                                                                                                                                                                                                                                                                                                                                                                                                                                                                                                                                                                                                                                                                                                                                                                                                                                                                                                                                                                                                                |
|---------------------------------------------------------|------------|----------|----------|------------------------------------------------------------------------------------------------------------------------------------------------------------------------------------------------------------------------------------------------------------------------------------------------------------------------------------------------------------------------------------------------------------------------------------------------------------------------------------------------------------------------------------------------------------------------------------------------------------------------------------------------------------------------------------------------------------------------------------------------------------------------------------------------------------------------------------------------------------------------------------------------------------------------------------------------------------------------------------------------------------------------------------------------------------------------------------------------------------------------------------------------------------------------------------------------------------------------------------------------|
| movement of cell or subcellular component               | GO:0006928 | 1.36E-13 | 1.38E-11 | Flrt2,399558:down Plxnd1,67784:up Cx3cr1,13051:down lgfbp3,16009:up Loxl2,94352:down Trf,22041:up Cxl14,57266:down Cd24a,12484:down Ceacam10,26366:up Wnt5a,22418:down Mark1,226778:up Stc1,20855:up Il1rn,16181:up Adipoq,11450:up Bmp4,12159:up lgf1,16000:up Cxl9,17329:up Tgfb2,21808:down F3,14066:up Cthrc1,68588:down Htr2b,15559:down Prl2c2,18811:up Efemp1,216616:up Ccl6,20305:up Dpysl3,22240:down Saa3,20210:up Cxl12,20315:up Mmp2,17390:down Gas6,14456:up Egfr,13649:down Sfrp1,20377:up Tgfb3,21814:up Ccl8,20307:up Ceacam1,26365:up Sfrp2,20319:up Ccl2,20296:up Ccl7,20306:up Ednrb,13618:up Figf,14205:up Pdgfc,54635:down Sema7a,20361:down Sord,20322:up Tnfrsf12a,27279:down Postn,50706:down Ccl12,20293:up Bmpr1a,12166:down Ccl4,20303:up Ret,19713:up Plpp3,67916:up Kitl,17311:up Ccl9,20308:up Lama2,16773:down Ptk7,71461:down Ccl3,20302:up Plat,18791:down Srxp2,68792:down Vegfa,22339:down Adamts12,239337:down Lrrc15,74488:down Tnf,21926:up Fxyd1,56188:up Fgfr1,14182:down Has2,15117:down Sulf1,240725:down Ptgs2,19225:down Grem1,23892:up Col3a1,12825:down Col5a1,12831:down                                                                                                                        |
| response to external stimulus                           | GO:0009605 | 1.37E-13 | 1.38E-11 | Adm,11535:up Flrt2,399558:down Plxnd1,67784:up Sfrp4,20379:up C3,12266:up Ankrd1,107765:down Cx3cr1,13051:down Cd109,235505:down Cxl14,57266:down Cd24a,12484:down Wnt5a,22418:down Adipoq,11450:up lgf1,16000:up Cxl9,17329:up Oasl1,231655:up Tgfb2,21808:down Hpse,15442:up Ptgir,19222:up Clec4e,56619:up Adamts4,240913:down Kng1,16644:up Ccl6,20305:up Sipi,20568:up Saa3,20210:up Vdr,22337:down Cxcr6,80901:down Fabp4,11770:up Cxl12,20315:up Htr2a,15558:down Mmp2,17390:down Oas3,246727:up Gas6,14456:up Egfr,13649:down Col11a1,12814:down C1qtnf3,81799:down Tfrc,22042:up Ceacam1,26365:up Ccl8,20307:up Sfrp2,20319:up Npnt,114249:up Tnfrsf11b,18383:up Mrc1,17533:up Ccl2,20296:up Ccl7,20306:up Ednrb,13618:up Figf,14205:up Ifit3,15959:up Sema7a,20361:down Clec4n,56620:up Postn,50706:down Ptx3,19288:up Ccl12,20293:up Ccl4,20303:up Gatm,67092:down Aldh1a3,56847:down Ifit1,15957:up Il1r1,17082:down Ccl9,20308:up Hp,15439:up Lama2,16773:down Aoah,27052:up Ccl3,20302:up Ctla2a,13024:down Plod2,26432:down Vegfa,22339:down Serpine2,20720:up Adamts12,239337:down Pparg,19016:up Tnf,21926:up Lmcd1,30937:up Fgfr1,14182:down Hmox1,15368:up Cd4,12504:up Ptgs2,19225:down Grem1,23892:up Serping1,12258:down |
| MAPK cascade                                            | GO:0000165 | 1.56E-13 | 1.55E-11 | lgfbp4,16010:up Sfrp4,20379:up Ccl7,20306:up Ccl2,20296:up C3,12266:up Pdgfc,54635:down Sema7a,20361:down lgfbp3,16009:up Dok2,13449:up Trf,22041:up Cd24a,12484:down Wnt5a,22418:down Ccl12,20293:up Il1rn,16181:up Ccl4,20303:up Adipoq,11450:up Bmp4,12159:up lgf1,16000:up Ret,19713:up Tgfb2,21808:down Fgfr2,14183:up Kitl,17311:up Htr2b,15559:down Ccl9,20308:up Ccl6,20305:up Inhba,16323:down Ccl3,20302:up Vegfa,22339:down Htr2a,15558:down lgf2,16002:up Gas6,14456:up Tnf,21926:up Egfr,13649:down Fgfr1,14182:down Sfrp1,20377:up C1qtnf3,81799:down Ccl8,20307:up Ceacam1,26365:up Sfrp2,20319:up Tnfrsf11b,18383:up Npnt,114249:up Errfi1,74155:down                                                                                                                                                                                                                                                                                                                                                                                                                                                                                                                                                                          |
| signal transduction by protein phosphorylation          | GO:0023014 | 1.74E-13 | 1.70E-11 | lgfbp4,16010:up Sfrp4,20379:up Ccl7,20306:up Ccl2,20296:up C3,12266:up Pdgfc,54635:down Sema7a,20361:down lgfbp3,16009:up Dok2,13449:up Trf,22041:up Cd24a,12484:down Wnt5a,22418:down Ccl12,20293:up Il1rn,16181:up Ccl4,20303:up Adipoq,11450:up Bmp4,12159:up lgf1,16000:up Ret,19713:up Tgfb2,21808:down Fgfr2,14183:up Kitl,17311:up Htr2b,15559:down Ccl9,20308:up Ccl6,20305:up Inhba,16323:down Ccl3,20302:up Vegfa,22339:down Htr2a,15558:down lgf2,16002:up Gas6,14456:up Tnf,21926:up Egfr,13649:down Fgfr1,14182:down Sfrp1,20377:up C1qtnf3,81799:down Ccl8,20307:up Ceacam1,26365:up Sfrp2,20319:up Tnfrsf11b,18383:up Npnt,114249:up Errfi1,74155:down                                                                                                                                                                                                                                                                                                                                                                                                                                                                                                                                                                          |
| regulation of MAPK cascade                              | GO:0043408 | 2.11E-13 | 2.03E-11 | lgfbp4,16010:up Sfrp4,20379:up Ccl7,20306:up Ccl2,20296:up C3,12266:up Pdgfc,54635:down Sema7a,20361:down lgfbp3,16009:up Trf,22041:up Cd24a,12484:down Wnt5a,22418:down Ccl12,20293:up Il1rn,16181:up Ccl4,20303:up Adipoq,11450:up Bmp4,12159:up lgf1,16000:up Tgfb2,21808:down Fgfr2,14183:up Kitl,17311:up Htr2b,15559:down Ccl9,20308:up Inhba,16323:down Ccl3,20302:up Vegfa,22339:down Htr2a,15558:down lgf2,16002:up Gas6,14456:up Tnf,21926:up Egfr,13649:down Fgfr1,14182:down Sfrp1,20377:up C1qtnf3,81799:down Ccl8,20307:up Ceacam1,26365:up Sfrp2,20319:up Tnfrsf11b,18383:up Npnt,114249:up Errfi1,74155:down                                                                                                                                                                                                                                                                                                                                                                                                                                                                                                                                                                                                                   |
| defense response                                        | GO:0006952 | 2.32E-13 | 2.20E-11 | Clec2d,93694:up Adm,11535:up Ly9,17085:up Mrc1,17533:up Ccl7,20306:up Ccl2,20296:up C3,12266:up Ednrb,13618:up Ifit3,15959:up Sema7a,20361:down Clec4n,56620:up Cx3cr1,13051:down Ggt5,23887:up Ptx3,19288:up Cd24a,12484:down Wnt5a,22418:down Ccl12,20293:up Il1rn,16181:up Ccl4,20303:up Adipoq,11450:up Cxl9,17329:up Oasl1,231655:up C1s2,317677:up Ptgir,19222:up Ifit1,15957:up F3,14066:up Il1r1,17082:down Clec4e,56619:up Adamts4,240913:down Kng1,16644:up Hp,15439:up Ccl9,20308:up Ccl6,20305:up Aoah,27052:up Sipi,20568:up Ccl3,20302:up Saa3,20210:up Ctla2a,13024:down Cxcr6,80901:down C1s1,50908:up Fabp4,11770:up Mmp2,17390:down Adamts12,239337:down Oas3,246727:up lgf2,16002:up Tnf,21926:up Pparg,19016:up Lmcd1,30937:up Egfr,13649:down Hmox1,15368:up C1qtnf3,81799:down Cd4,12504:up Ptgs2,19225:down C1rb,667277:up Ceacam1,26365:up Ccl8,20307:up Serping1,12258:up Tnfrsf11b,18383:up                                                                                                                                                                                                                                                                                                                          |
| negative regulation of multicellular organismal process | GO:0051241 | 2.42E-13 | 2.26E-11 | Fstl3,83554:down Col5a2,12832:down Clec2d,93694:up Adm,11535:up Tmem176b,65963:up Ccl2,20296:up Ednrb,13618:up Cx3cr1,13051:down Plk2,20620:down Cd24a,12484:down Wnt5a,22418:down Bmpr1a,12166:down Stc1,20855:up Adipoq,11450:up Bmp4,12159:up lgf1,16000:up Prg4,96875:down Tgfb2,21808:down Thbs2,21826:down Il1r1,17082:down Fam101b,76566:down Kng1,16644:up Lrrc17,74511:down Efemp1,216616:up Inhba,16323:down Dpysl3,22240:down Aspn,66695:down Vegfa,22339:down Mmp2,17390:down Serpine2,20720:up Adamts12,239337:down Anpep,16790:up Pparg,19016:up Gas6,14456:up Tnf,21926:up Tmem176a,66058:up Fgfr1,14182:down Sfrp1,20377:up Hmox1,15368:up Sulf1,240725:down C1qtnf3,81799:down Tgfb3,21814:up Ptgs2,19225:down Grem1,23892:up Col3a1,12825:down Ceacam1,26365:up Sfrp2,20319:up Serping1,12258:up Col5a1,12831:down Rspo2,239405:up Tnfrsf11b,18383:up Errfi1,74155:down Enpp1,18605:down                                                                                                                                                                                                                                                                                                                                     |

|                                       |            |          |          |                                                                                                                                                                                                                                                                                                                                                                                                                                                                                                                                                                                                                                                                                                                                                                                                                                                                                                                                                                                                                                                                                                                                                                                                                                                                                                                                                                                                                                                                                                                                                                                                                                                                                                                                                                                                                                                                                                                                                                                                                                                                                                                                                                                                                                                                                                                                                                                                                                                                                                                                                                                                                         |
|---------------------------------------|------------|----------|----------|-------------------------------------------------------------------------------------------------------------------------------------------------------------------------------------------------------------------------------------------------------------------------------------------------------------------------------------------------------------------------------------------------------------------------------------------------------------------------------------------------------------------------------------------------------------------------------------------------------------------------------------------------------------------------------------------------------------------------------------------------------------------------------------------------------------------------------------------------------------------------------------------------------------------------------------------------------------------------------------------------------------------------------------------------------------------------------------------------------------------------------------------------------------------------------------------------------------------------------------------------------------------------------------------------------------------------------------------------------------------------------------------------------------------------------------------------------------------------------------------------------------------------------------------------------------------------------------------------------------------------------------------------------------------------------------------------------------------------------------------------------------------------------------------------------------------------------------------------------------------------------------------------------------------------------------------------------------------------------------------------------------------------------------------------------------------------------------------------------------------------------------------------------------------------------------------------------------------------------------------------------------------------------------------------------------------------------------------------------------------------------------------------------------------------------------------------------------------------------------------------------------------------------------------------------------------------------------------------------------------------|
| multicellular organismal process      | GO:0032501 | 2.54E-13 | 2.33E-11 | <p>Fstl3,83554:down Adm,11535:up Flrt2,399558:down Tmem176b,65963:up Plxnd1,67784:up Sfrp4,20379:up Serpinh1,12406:down Lyl1,17095:up lgfbp3,16009:up lbsp,15891:up Plk2,20620:down Cd24a,12484:down Mme,17380:up llrn,16181:up Bmp4,12159:up Hps,15442:up Fgfr2,14183:up Thbs2,21826:down Htr2b,15559:down Gjb5,14622:down Anxa8,11752:down Aspn,66695:down Mmp2,17390:down Slc40a1,53945:up Egfr,13649:down Alpl,11647:up Tfrc,22042:up Snrg,20618:up Rspo2,239405:up Fam20a,208659:down Cdsn,386463:up Col5a2,12832:down Aldh1a2,19378:up Ccl2,20296:up Ednrb,13618:up Ampd3,11717:up Mmp13,17386:up Tnfrsf12a,27279:down Uchl5,56207:up Clec4n,56620:up Shroom4,208431:down Cdo1,12583:up Csrp2,13008:down Ncam1,17967:down Ccl4,20303:up Chst11,58250:down Tmeff1,230157:down Vegfb,22340:up Aldh1a3,56847:down Plpp3,67916:up Mrc2,17534:down Lrrc17,74511:down Lama2,16773:down Ptk7,71461:down Inhba,16323:down Bnc2,242509:down Tfpi2,21789:down Crif1,12931:down Vegfa,22339:down Serpine2,20720:up Nxn,18230:down lgf2,16002:up Tmem176a,66058:up Tnf,21926:up Col1a2,12843:down Fxyd1,56188:up Fgfr1,14182:down Lpl,16956:up Sulf1,240725:down Cd4,12504:up Col3a1,12825:down Tbx15,21384:down Serp1,12258:up Enpp1,18605:down Clec2d,93694:up Hpgd,15446:up C3,12266:up Ankrd1,107765:down Cx3cr1,13051:down Cd109,235505:down Loxl2,94352:down Trf,22041:up Loxl3,16950:down Cxl14,57266:down Wnt5a,22418:down Stc1,20855:up Mark1,226778:up Col8a1,12837:down Adipoq,11450:up lgf1,16000:up Crabp2,12904:down Tgfb2,21808:down F3,14066:down Clec4e,56619:up Cthrc1,68588:down Kng1,16644:up Prl2c2,18811:up Efemp1,216616:up Dpysl3,22240:down Ninj1,18081:up Vdr,22337:down Fabp4,11770:up Cxl12,20315:up Htr2a,15558:down Gas6,14456:up Col11a1,12814:down Sfrp1,20377:up C1qtnf3,81799:down Tgfbr3,21814:up Tll1,21892:down Ceacam1,26365:up Sfrp2,20319:up Tnfrsf11b,18383:up Prkar2b,19088:up Npnt,114249:up S100a1,20193:up Ly9,17085:up Pdgfc,54635:down Mgp,17313:up Figf,14205:up Epas1,13819:up Slc29a1,63959:up Sema7a,20361:down Gpm6b,14758:up Ddah1,69219:down Postn,50706:down Ccl12,20293:up Bmpr1a,12166:down Wisp1,22402:down Ank,11732:down Tnc,21923:down Ret,19713:up Prg4,96875:down Sdf2l1,64136:up Creb3l1,26427:down Kitl,17311:up Fam101b,76566:down Hp,15439:up Ccl3,20302:up Plat,18791:down Ctla2a,13024:down Srp2,68792:down Adamts12,239337:down Anpep,16790:up Pparg,19016:up Lmcd1,30937:up Glp1r,14652:down Hmox1,15368:up Has2,15117:down Ptgs2,19225:down Grem1,23892:up Pcdh19,279653:down Mcoln3,171166:up Col5a1,12831:down Errf1,74155:down Tnfsf9,21950:up</p> |
| single-organism developmental process | GO:0044767 | 3.14E-13 | 2.85E-11 | <p>Fstl3,83554:down Adm,11535:up Flrt2,399558:down Tmem176b,65963:up Plxnd1,67784:up Sfrp4,20379:up Serpinh1,12406:down Lyl1,17095:up lgfbp3,16009:up lbsp,15891:up Plk2,20620:down Cd24a,12484:down llrn,16181:up Bmp4,12159:up Hps,15442:up Medag,70717:down Fgfr2,14183:up Thbs2,21826:down Htr2b,15559:down Gjb5,14622:down Aspn,66695:down Mmp2,17390:down Slc40a1,53945:up Egfr,13649:down Alpl,11647:up Tfrc,22042:up Ccl8,20307:up Rspo2,239405:up Fam20a,208659:down Cdsn,386463:up Col5a2,12832:down Aldh1a2,19378:up Ccl2,20296:up Ednrb,13618:up Mmp13,17386:up Tnfrsf12a,27279:down Uchl5,56207:up Shroom4,208431:down Cdo1,12583:up Csrp2,13008:down Ncam1,17967:down Chst11,58250:down Tmeff1,230157:down Vegfb,22340:up Aldh1a3,56847:down Plpp3,67916:up Mrc2,17534:down Lrrc17,74511:down Lama2,16773:down Ccl9,20308:up Ptk7,71461:down Inhba,16323:down Bnc2,242509:down Crif1,12931:down Vegfa,22339:down Serpine2,20720:up Nxn,18230:down lgf2,16002:up Tnf,21926:up Tmem176a,66058:up Col1a2,12843:down Fgfr1,14182:down Lpl,16956:up Sulf1,240725:down Cd4,12504:up Col3a1,12825:down Tbx15,21384:down Enpp1,18605:down Clec2d,93694:up Hpgd,15446:up C3,12266:up Ankrd1,107765:down Cx3cr1,13051:down Cd109,235505:down Loxl2,94352:down Trf,22041:up Loxl3,16950:down Cxl14,57266:down Wnt5a,22418:down Stc1,20855:up Mark1,226778:up Col8a1,12837:down Adipoq,11450:up lgf1,16000:up Crabp2,12904:down Cxl9,17329:up Tgfb2,21808:down F3,14066:up Clec4e,56619:up Prl2c2,18811:up Cthrc1,68588:down Efemp1,216616:up Dpysl3,22240:down Ninj1,18081:up Vdr,22337:down Fabp4,11770:up Cxl12,20315:up Htr2a,15558:down Gas6,14456:up Col11a1,12814:down Sfrp1,20377:up Tgfbr3,21814:up Tll1,21892:down Ceacam1,26365:up Sfrp2,20319:up Tnfrsf11b,18383:up Npnt,114249:up Ly9,17085:up Mgp,17313:up Figf,14205:up Pdgfc,54635:down Epas1,13819:up Sema7a,20361:down Gpm6b,14758:up Ddah1,69219:down Postn,50706:down Ccl12,20293:up Bmpr1a,12166:down Wisp1,22402:down Ank,11732:down Tnc,21923:down Ret,19713:up Prg4,96875:down Sdf2l1,64136:up Creb3l1,26427:down Kitl,17311:up Fam101b,76566:down Hp,15439:up Ccl3,20302:up Ctla2a,13024:down Srp2,68792:down Prep,116847:up Adamts12,239337:down Anpep,16790:up Pparg,19016:up Glp1r,14652:down Hmox1,15368:up Has2,15117:down Ptgs2,19225:down Grem1,23892:up Pcdh19,279653:down Mcoln3,171166:up Col5a1,12831:down Errf1,74155:down Tnfsf9,21950:up</p>                                                                                                                                                                                   |
| developmental process                 | GO:0032502 | 7.43E-13 | 6.63E-11 | <p>Fstl3,83554:down Adm,11535:up Flrt2,399558:down Tmem176b,65963:up Plxnd1,67784:up Sfrp4,20379:up Serpinh1,12406:down Lyl1,17095:up lgfbp3,16009:up lbsp,15891:up Plk2,20620:down Cd24a,12484:down llrn,16181:up Bmp4,12159:up Hps,15442:up Medag,70717:down Fgfr2,14183:up Thbs2,21826:down Htr2b,15559:down Gjb5,14622:down Aspn,66695:down Mmp2,17390:down Slc40a1,53945:up Egfr,13649:down Alpl,11647:up Tfrc,22042:up Ccl8,20307:up Rspo2,239405:up Fam20a,208659:down Cdsn,386463:up Col5a2,12832:down Aldh1a2,19378:up Ccl2,20296:up Ednrb,13618:up Mmp13,17386:up Tnfrsf12a,27279:down Uchl5,56207:up Shroom4,208431:down Cdo1,12583:up Csrp2,13008:down Ncam1,17967:down Chst11,58250:down Tmeff1,230157:down Vegfb,22340:up Aldh1a3,56847:down Plpp3,67916:up Mrc2,17534:down Lrrc17,74511:down Lama2,16773:down Ccl9,20308:up Ptk7,71461:down Inhba,16323:down Bnc2,242509:down Crif1,12931:down Vegfa,22339:down Serpine2,20720:up Nxn,18230:down lgf2,16002:up Tnf,21926:up Tmem176a,66058:up Col1a2,12843:down Fgfr1,14182:down Lpl,16956:up Sulf1,240725:down Cd4,12504:up Col3a1,12825:down Tbx15,21384:down Enpp1,18605:down Clec2d,93694:up Hpgd,15446:up C3,12266:up Ankrd1,107765:down Cx3cr1,13051:down Cd109,235505:down Loxl2,94352:down Trf,22041:up Loxl3,16950:down Cxl14,57266:down Wnt5a,22418:down Stc1,20855:up Mark1,226778:up Col8a1,12837:down Adipoq,11450:up lgf1,16000:up Crabp2,12904:down Cxl9,17329:up Tgfb2,21808:down F3,14066:up Clec4e,56619:up Prl2c2,18811:up Cthrc1,68588:down Efemp1,216616:up Dpysl3,22240:down Ninj1,18081:up Vdr,22337:down Fabp4,11770:up Cxl12,20315:up Htr2a,15558:down Gas6,14456:up Col11a1,12814:down Sfrp1,20377:up Tgfbr3,21814:up Tll1,21892:down Ceacam1,26365:up Sfrp2,20319:up Tnfrsf11b,18383:up Npnt,114249:up Ly9,17085:up Mgp,17313:up Figf,14205:up Pdgfc,54635:down Epas1,13819:up Sema7a,20361:down Gpm6b,14758:up Ddah1,69219:down Postn,50706:down Ccl12,20293:up Bmpr1a,12166:down Wisp1,22402:down Ank,11732:down Tnc,21923:down Ret,19713:up Prg4,96875:down Sdf2l1,64136:up Creb3l1,26427:down Kitl,17311:up Fam101b,76566:down Hp,15439:up Ccl3,20302:up Ctla2a,13024:down Srp2,68792:down Prep,116847:up Adamts12,239337:down Anpep,16790:up Pparg,19016:up Glp1r,14652:down Hmox1,15368:up Has2,15117:down Ptgs2,19225:down Grem1,23892:up Pcdh19,279653:down Mcoln3,171166:up Col5a1,12831:down Errf1,74155:down Tnfsf9,21950:up</p>                                                                                                                                                                                   |

|                                                  |            |          |          |                                                                                                                                                                                                                                                                                                                                                                                                                                                                                                                                                                                                                                                                                                                                                                                                                                                                                                                                                                                                                                                                                                                                                                                                                                                                                                                                                                                                                                                                                                                                                                                                                                                                                                                                                                                                                                                             |
|--------------------------------------------------|------------|----------|----------|-------------------------------------------------------------------------------------------------------------------------------------------------------------------------------------------------------------------------------------------------------------------------------------------------------------------------------------------------------------------------------------------------------------------------------------------------------------------------------------------------------------------------------------------------------------------------------------------------------------------------------------------------------------------------------------------------------------------------------------------------------------------------------------------------------------------------------------------------------------------------------------------------------------------------------------------------------------------------------------------------------------------------------------------------------------------------------------------------------------------------------------------------------------------------------------------------------------------------------------------------------------------------------------------------------------------------------------------------------------------------------------------------------------------------------------------------------------------------------------------------------------------------------------------------------------------------------------------------------------------------------------------------------------------------------------------------------------------------------------------------------------------------------------------------------------------------------------------------------------|
| cell proliferation                               | GO:0008283 | 7.85E-13 | 6.91E-11 | Igfbp4,16010:up Adm,11535:up Sfrp4,20379:up Cx3cr1,13051:down Igfbp3,16009:up Cd109,235505:down Loxl2,94352:down Trf,22041:up Cd24a,12484:down Wnt5a,22418:down Stc1,20855:up Col8a1,12837:down Adipoq,11450:up Bmp4,12159:up Igf1,16000:up Cxl9,17329:up Tgfb2,21808:down Hpse,15442:up Ptgir,19222:up Fgfr2,14183:up F3,14066:up Cthrc1,68588:down Htr2b,15559:down Prl2c2,18811:up Efemp1,216616:up Vdr,22337:down Fabp4,11770:up Cxl12,20315:up Htr2a,15558:down Mmp2,17390:down Gas6,14456:up Egfr,13649:down Sfrp1,20377:up Tgfr3,21814:up Tfrc,22042:up Ceacam1,26365:up Sfrp2,20319:up Tnfrsf11b,18383:up Aldh1a2,19378:up Ccl2,20296:up Ednrb,13618:up Figf,14205:up Pdgfc,54635:down Akr1c18,105349:up Ncam1,17967:down Ccl12,20293:up Bmpr1a,12166:down Wisp1,22402:down Chst11,58250:down Tnc,21923:down Prg4,96875:down Pdxk,216134:up Kitl,17311:up Il1r1,17082:down Inhba,16323:down Crif1,12931:down Vegfa,22339:down Serpine2,20720:up Igf2,16002:up Pparg,19016:up Tnf,21926:up Glp1r,14652:down Fgfr1,14182:down Hmox1,15368:up Has2,15117:down Sulf1,240725:down Cd4,12504:up Ptgs2,19225:down Grem1,23892:up Errf1,74155:down Tnfsf9,21950:up                                                                                                                                                                                                                                                                                                                                                                                                                                                                                                                                                                                                                                                                                          |
| angiogenesis                                     | GO:0001525 | 8.26E-13 | 7.06E-11 | Adm,11535:up Plxnd1,67784:up Ccl2,20296:up C3,12266:up Figf,14205:up Epas1,13819:up Tnfrsf12a,27279:down Ddah1,69219:down Cx3cr1,13051:down Loxl2,94352:down Wnt5a,22418:down Ccl12,20293:up Col8a1,12837:down Bmp4,12159:up Hpse,15442:up Vegfb,22340:up Fgfr2,14183:up F3,14066:up Thbs2,21826:down Prl2c2,18811:up Srxp2,68792:down Cxl12,20315:up Vegfa,22339:down Mmp2,17390:down Anpep,16790:up Fgfr1,14182:down Hmox1,15368:up Sulf1,240725:down Ptgs2,19225:down Grem1,23892:up Ceacam1,26365:up Sfrp2,20319:up                                                                                                                                                                                                                                                                                                                                                                                                                                                                                                                                                                                                                                                                                                                                                                                                                                                                                                                                                                                                                                                                                                                                                                                                                                                                                                                                     |
| enzyme linked receptor protein signaling pathway | GO:0007167 | 9.67E-13 | 8.15E-11 | Fstl3,83554:down Igfbp4,16010:up Flrt2,399558:down Hpgd,15446:up Ccl2,20296:up Pdgfc,54635:down Figf,14205:up Htra3,78558:down Igfbp3,16009:up Cd109,235505:down Dok2,13449:up Trf,22041:up Wnt5a,22418:down Bmpr1a,12166:down Adipoq,11450:up Bmp4,12159:up Igf1,16000:up Chst11,58250:down Ret,19713:up Tgfb2,21808:down Ptgir,19222:up Fgfr2,14183:up F3,14066:up Efemp1,216616:up Inhba,16323:down Aspn,66695:down Plat,18791:down Vegfa,22339:down Adams12,239337:down Igf2,16002:up Gas6,14456:up Col1a2,12843:down Egfr,13649:down Fgfr1,14182:down Sfrp1,20377:up Sulf1,240725:down Tgfr3,21814:up Grem1,23892:up Col3a1,12825:down Ceacam1,26365:up Sfrp2,20319:up Npnt,114249:up Errf1,74155:down Enpp1,18605:down                                                                                                                                                                                                                                                                                                                                                                                                                                                                                                                                                                                                                                                                                                                                                                                                                                                                                                                                                                                                                                                                                                                                |
| regulation of signal transduction                | GO:0009966 | 1.00E-12 | 8.34E-11 | Fstl3,83554:down Igfbp4,16010:up Adm,11535:up Flrt2,399558:down Sfrp4,20379:up C3,12266:up Ankrd1,107765:down Cx3cr1,13051:down Igfbp3,16009:up Cd109,235505:down Plk2,20620:down Trf,22041:up Cd24a,12484:down Wnt5a,22418:down Il1r1,16181:up Adipoq,11450:up Bmp4,12159:up Igf1,16000:up Crabp2,12904:down Tgfb2,21808:down Hpse,15442:up Ptgir,19222:up Fgfr2,14183:up F3,14066:up Cthrc1,68588:down Htr2b,15559:down Ccl6,20305:up Aspn,66695:down Cxl12,20315:up Htr2a,15558:down Gas6,14456:up Egfr,13649:down Sfrp1,20377:up C1qtnf3,81799:down Tgfr3,21814:up Ceacam1,26365:up Ccl8,20307:up Sfrp2,20319:up Rspo2,239405:up Npnt,114249:up Tnfrsf11b,18383:up Ccl2,20296:up Ccl7,20306:up Pdgfc,54635:down Figf,14205:up Sema7a,20361:down Htra3,78558:down Tnfrsf12a,27279:down Clec4n,56620:up Postn,50706:down Akr1c18,105349:up Ncam1,17967:down Ccl12,20293:up Bmpr1a,12166:down Ccl4,20303:up Chst11,58250:down Ret,19713:up Sdf2l1,64136:up Aldh1a3,56847:down Ppp3,67916:up Creb3l1,26427:down Kitl,17311:up Il1r1,17082:down Ccl9,20308:up Inhba,16323:down Ccl3,20302:up Crif1,12931:down Vegfa,22339:down Serpine2,20720:up Adams12,239337:down Lrrc15,74488:down Igf2,16002:up Nxn,18230:down Pparg,19016:up Tnf,21926:up Lmcd1,30937:up Tnfrsf23,79201:down Fgfr1,14182:down Hmox1,15368:up Sulf1,240725:down Cd4,12504:up Ptgs2,19225:down Grem1,23892:up Col3a1,12825:down Errf1,74155:down Enpp1,18605:down                                                                                                                                                                                                                                                                                                                                                                                                                        |
| regulation of inflammatory response              | GO:0050727 | 1.09E-12 | 8.91E-11 | Ccl9,20308:up Ccl6,20305:up Aoah,27052:up Ccl7,20306:up Ccl2,20296:up C3,12266:up Ednrb,13618:up Ccl3,20302:up Sema7a,20361:down Ctla2a,13024:down Fabp4,11770:up Cx3cr1,13051:down Adams12,239337:down Pparg,19016:up Tnf,21926:up Egfr,13649:down Cd24a,12484:down C1qtnf3,81799:down Wnt5a,22418:down Ccl12,20293:up Ptgs2,19225:down Ccl4,20303:up Adipoq,11450:up Ccl8,20307:up Serp1,12258:up Il1r1,17082:down                                                                                                                                                                                                                                                                                                                                                                                                                                                                                                                                                                                                                                                                                                                                                                                                                                                                                                                                                                                                                                                                                                                                                                                                                                                                                                                                                                                                                                        |
| skeletal system development                      | GO:0001501 | 1.62E-12 | 1.31E-10 | Col5a2,12832:down Pdgfc,54635:down Mgp,17313:up Mmp13,17386:up Serpinh1,12406:down Loxl2,94352:down Wnt5a,22418:down Bmpr1a,12166:down Stc1,20855:up Bmp4,12159:up Igf1,16000:up Chst11,58250:down Tgfb2,21808:down Fgfr2,14183:up Fam101b,76566:down Lrrc17,74511:down Efemp1,216616:up Bnc2,242509:down Vdr,22337:down Vegfa,22339:down Mmp2,17390:down Adams12,239337:down Col1a2,12843:down Col11a1,12814:down Alpl,11647:up Fgfr1,14182:down Sfrp1,20377:up Has2,15117:down Sulf1,240725:down Grem1,23892:up Sfrp2,20319:up Tbx15,21384:down Rspo2,239405:up                                                                                                                                                                                                                                                                                                                                                                                                                                                                                                                                                                                                                                                                                                                                                                                                                                                                                                                                                                                                                                                                                                                                                                                                                                                                                           |
| cell differentiation                             | GO:0030154 | 1.69E-12 | 1.35E-10 | Fstl3,83554:down Clec2d,93694:up Adm,11535:up Flrt2,399558:down Tmem176b,65963:up Plxnd1,67784:up Sfrp4,20379:up Ankrd1,107765:down Serpinh1,12406:down Lyl1,17095:up Cx3cr1,13051:down Igfbp3,16009:up Ibsp,15891:up Cd109,235505:down Loxl2,94352:down Plk2,20620:down Loxl3,16950:down Trf,22041:up Cxl14,57266:down Cd24a,12484:down Wnt5a,22418:down Mark1,226778:up Stc1,20855:up Adipoq,11450:up Bmp4,12159:up Igf1,16000:up Crabp2,12904:down Cxl9,17329:up Tgfb2,21808:down M edag,70717:down Fgfr2,14183:up Clec4e,56619:up Cthrc1,68588:down Htr2b,15559:down Prl2c2,18811:up Efemp1,216616:up Gjb5,14622:down Dpysl3,22240:down Vdr,22337:down Fabp4,11770:up Cxl12,20315:up Htr2a,15558:down Mmp2,17390:down Gas6,14456:up Egfr,13649:down Col11a1,12814:down Alpl,11647:up Sfrp1,20377:up Tgfr3,21814:up Tfrc,22042:up Tll1,21892:down Ceacam1,26365:up Ccl8,20307:up Sfrp2,20319:up Rspo2,239405:up Npnt,114249:up Ccl5a2,12832:down Ly9,17085:up Aldh1a2,19378:up Ccl2,20296:up Ednrb,13618:up Figf,14205:up Mgp,17313:up Sema7a,20361:down Epas1,13819:up Tnfrsf12a,27279:down Postn,50706:down Csrp2,13008:down Ncam1,17967:down Ccl12,20293:up Bmpr1a,12166:down Wisp1,22402:down Chst11,58250:down Tnc,21923:down Ret,19713:up Vegfb,22340:up Ppp3,67916:up Creb3l1,26427:down Mrc2,17534:down Kitl,17311:up Fam101b,76566:down Lrrc17,74511:down Lama2,16773:down Ccl9,20308:up Ptk7,71461:down Inhba,16323:down Ccl3,20302:up Ctla2a,13024:down Vegfa,22339:down Serpine2,20720:up Adams12,239337:down Nxn,18230:down Igf2,16002:up Anpep,16790:up Pparg,19016:up Tnf,21926:up Tmem176a,66058:up Glp1r,14652:down Fgfr1,14182:down Has2,15117:down Lpl,16956:up Sulf1,240725:down Cd4,12504:up Ptgs2,19225:down Grem1,23892:up Col3a1,12825:down Mcoln3,171166:up Col5a1,12831:down Errf1,74155:down Enpp1,18605:down Tnfsf9,21950:up |
| inflammatory response                            | GO:0006954 | 1.89E-12 | 1.49E-10 | Ccl7,20306:up Ccl2,20296:up C3,12266:up Ednrb,13618:up Sema7a,20361:down Cx3cr1,13051:down Ggt5,23887:up Cd24a,12484:down Wnt5a,22418:down Ccl12,20293:up Il1r1,16181:up Ccl4,20303:up Adipoq,11450:up Cxl9,17329:up Ptgir,19222:up F3,14066:up Il1r1,17082:down Kng1,16644:up Hp,15439:up Ccl9,20308:up Ccl6,20305:up Aoah,27052:up Ccl3,20302:up Saa3,20210:up Ctla2a,13024:down Cxcr6,80901:down Fabp4,11770:up Adams12,239337:down Pparg,19016:up Tnf,21926:up Egfr,13649:down Hmox1,15368:up C1qtnf3,81799:down Ptgs2,19225:down Ccl8,20307:up Serp1,12258:up Tnfrsf11b,18383:up                                                                                                                                                                                                                                                                                                                                                                                                                                                                                                                                                                                                                                                                                                                                                                                                                                                                                                                                                                                                                                                                                                                                                                                                                                                                       |

|                                                  |            |          |          |                                                                                                                                                                                                                                                                                                                                                                                                                                                                                                                                                                                                                                                                                                                                                                                                                                                                                                                                                                                                                                                                                                                                                                                                                                                                                                                                                                                                                                                                                                                                                                                                                                                                                                                                                                                                                                                                                                                                                                                                                                                                                                                                                                                                                                                                                                                  |
|--------------------------------------------------|------------|----------|----------|------------------------------------------------------------------------------------------------------------------------------------------------------------------------------------------------------------------------------------------------------------------------------------------------------------------------------------------------------------------------------------------------------------------------------------------------------------------------------------------------------------------------------------------------------------------------------------------------------------------------------------------------------------------------------------------------------------------------------------------------------------------------------------------------------------------------------------------------------------------------------------------------------------------------------------------------------------------------------------------------------------------------------------------------------------------------------------------------------------------------------------------------------------------------------------------------------------------------------------------------------------------------------------------------------------------------------------------------------------------------------------------------------------------------------------------------------------------------------------------------------------------------------------------------------------------------------------------------------------------------------------------------------------------------------------------------------------------------------------------------------------------------------------------------------------------------------------------------------------------------------------------------------------------------------------------------------------------------------------------------------------------------------------------------------------------------------------------------------------------------------------------------------------------------------------------------------------------------------------------------------------------------------------------------------------------|
| positive regulation of protein phosphorylation   | GO:001934  | 2.20E-12 | 1.71E-10 | Igfbp4,16010:up Ccl7,20306:up Ccl2,20296:up C3,12266:up Pdgfc,54635:down Ednrb,13618:up Sema7a,20361:down Igfbp3,16009:up Trf,22041:up Cd24a,12484:down Wnt5a,22418:down Bmpr1a,12166:down Ccl12,20293:up I1rn,16181:up Ccl4,20303:up Adipoq,11450:up Bmp4,12159:up Igf1,16000:up Ret,19713:up Tgfb2,21808:down Plpp3,67916:up Fgfr2,14183:up Kitl,17311:up Htr2b,15559:down Ccl9,20308:up Ccl6,20305:up Inhba,16323:down Ccl3,20302:up Crlf1,12931:down Vegfa,22339:down Htr2a,15558:down Igf2,16002:up Gas6,14456:up Tnf,21926:up Fgfr1,14182:down Egfr,13649:down C1qtnf3,81799:down Cd4,12504:up Grem1,23892:up Ccl8,20307:up Ceacam1,26365:up Sfrp2,20319:up Fam20a,208659:down Tnfrsf11b,18383:up Npnt,114249:up                                                                                                                                                                                                                                                                                                                                                                                                                                                                                                                                                                                                                                                                                                                                                                                                                                                                                                                                                                                                                                                                                                                                                                                                                                                                                                                                                                                                                                                                                                                                                                                           |
| anatomical structure development                 | GO:0048856 | 2.50E-12 | 1.92E-10 | Fstl3,83554:down Adm,11535:up Flrt2,399558:down Tmem176b,65963:up Plxnd1,67784:up Sfrp4,20379:up Serpinh1,12406:down Lyl1,17095:up Igfbp3,16009:up Ibsp,15891:up Plk2,20620:down Cd24a,12484:down I1rn,16181:up Bmp4,12159:up Hpse,15442:up Fgfr2,14183:up Thbs2,21826:down Htr2b,15559:down Gjb5,14622:down Aspn,66695:down Mmp2,17390:down Slc40a1,53945:up Egfr,13649:down Alpl,11647:up Tfrc,22042:up Ccl8,20307:up Rspo2,239405:up Fam20a,208659:down Cdsn,386463:up Col5a2,12832:down Aldh1a2,19378:up Ccl2,20296:up Ednrb,13618:up Mmp13,17386:up Tnfrsf12a,27279:down Uchl5,56207:up Shroom4,208431:down Cdo1,12583:up Csrp2,13008:down Ncam1,17967:down Chst11,58250:down Tmeff1,230157:down Vegfb,22340:up Aldh1a3,56847:down Plpp3,67916:up Lrrc17,74511:down Lama2,16773:down Ccl9,20308:up Ptk7,71461:down Inhba,16323:down Bnc2,242509:down Crlf1,12931:down Vegfa,22339:down Serpine2,20720:up Nxn,18230:down Igf2,16002:up Tnf,21926:up Tmem176a,66058:up Col1a2,12843:down Fgfr1,14182:down Sulf1,240725:down Cd4,12504:up Col3a1,12825:down Tbx15,21384:down Enpp1,18605:down Clec2d,93694:up Hpgd,15446:up C3,12266:up Ankrd1,107765:down Cx3cr1,13051:down Cd109,235505:down Trf,22041:up Loxl3,16950:down Loxl2,94352:down Cxcl14,57266:down Wnt5a,22418:down Stc1,20855:up Mark1,226778:up Col8a1,12837:down Adipoq,11450:up Igf1,16000:up Crabp2,12904:down Cxl9,17329:up Tgfb2,21808:down F3,14066:up Clec4e,56619:up Prl2c2,18811:up Cthrc1,68588:down Efemp1,216616:up Dpysl3,22240:down Ninj1,18081:up Vdr,22337:down Cxl12,20315:up Gas6,14456:up Ccl11a1,12814:down Sfrp1,20377:up Tgfb3,21814:up Tl1,21892:down Ceacam1,26365:up Sfrp2,20319:up Tnfrsf11b,18383:up Npnt,114249:up Ly9,17085:up Mgp,17313:up Figf,14205:up Pdgfc,54635:down Epas1,13819:up Sema7a,20361:down Gpm6b,14758:up Ddah1,69219:down Postn,50706:down Ccl12,20293:up Bmpr1a,12166:down Wisp1,22402:down Ank,11732:down Tnc,21923:down Ret,19713:up Sdf2l1,64136:up Prg4,96875:down Creb3l1,26427:down Kitl,17311:up Fam101b,76566:down Hp,15439:up Ccl3,20302:up Ctla2a,13024:down Srpx2,68792:down Adams12,239337:down Anpep,16790:up Pparg,19016:up Hmox1,15368:up Has2,15117:down Ptgs2,19225:down Grem1,23892:up Pcdh19,279653:down Mcoln3,171166:up Col5a1,12831:down Errf1,74155:down Tnfsf9,21950:up |
| positive regulation of cell differentiation      | GO:0045597 | 2.58E-12 | 1.96E-10 | Adm,11535:up Sfrp4,20379:up Sema7a,20361:down Ankrd1,107765:down Tnfrsf12a,27279:down Cx3cr1,13051:down Igfbp3,16009:up Loxl2,94352:down Trf,22041:up Cd24a,12484:down Wnt5a,22418:down Bmpr1a,12166:down Wisp1,22402:down Adipoq,11450:up Bmp4,12159:up Igf1,16000:up Crabp2,12904:down Cxl9,17329:up Ret,19713:up Tgfb2,21808:down Medag,70717:down Kitl,17311:up Cthrc1,68588:down Prl2c2,18811:up Ptk7,71461:down Inhba,16323:down Dpysl3,22240:down Ccl3,20302:up Vdr,22337:down Cxl12,20315:up Vegfa,22339:down Htr2a,15558:down Serpine2,20720:up Pparg,19016:up Gas6,14456:up Tnf,21926:up Glp1r,14652:down Fgfr1,14182:down Lpl,16956:up Sfrp1,20377:up Has2,15117:down Ptgs2,19225:down Grem1,23892:up Ccl8,20307:up Ceacam1,26365:up Sfrp2,20319:up Npnt,114249:up Tnfsf9,21950:up                                                                                                                                                                                                                                                                                                                                                                                                                                                                                                                                                                                                                                                                                                                                                                                                                                                                                                                                                                                                                                                                                                                                                                                                                                                                                                                                                                                                                                                                                                                    |
| regulation of response to external stimulus      | GO:0032101 | 4.09E-12 | 3.03E-10 | Plxnd1,67784:up Ccl7,20306:up Ccl2,20296:up C3,12266:up Figf,14205:up Ednrb,13618:up Sema7a,20361:down Cx3cr1,13051:down Cd109,235505:down Cxl14,57266:down Cd24a,12484:down Wnt5a,22418:down Ccl12,20293:up Ccl4,20303:up Adipoq,11450:up Cxl9,17329:up Hpse,15442:up I1rn,16181:up Kng1,16644:up Ccl9,20308:up Ccl6,20305:up Aoah,27052:up Ccl3,20302:up Ctla2a,13024:down Fabp4,11770:up Cxl12,20315:up Vegfa,22339:down Serpine2,20720:up Adams12,239337:down Pparg,19016:up Gas6,14456:up Tnf,21926:up Lmcd1,30937:up Fgfr1,14182:down Egfr,13649:down Hmox1,15368:up C1qtnf3,81799:down Ptgs2,19225:down Grem1,23892:up Ccl8,20307:up Ceacam1,26365:up Serp1,12258:up                                                                                                                                                                                                                                                                                                                                                                                                                                                                                                                                                                                                                                                                                                                                                                                                                                                                                                                                                                                                                                                                                                                                                                                                                                                                                                                                                                                                                                                                                                                                                                                                                                      |
| regulation of protein phosphorylation            | GO:001932  | 5.23E-12 | 3.83E-10 | Igfbp4,16010:up Flrt2,399558:down Sfrp4,20379:up Ccl7,20306:up Ccl2,20296:up C3,12266:up Pdgfc,54635:down Ednrb,13618:up Sema7a,20361:down Igfbp3,16009:up Cd109,235505:down Trf,22041:up Cd24a,12484:down Wnt5a,22418:down Bmpr1a,12166:down Ccl12,20293:up I1rn,16181:up Adipoq,11450:up Bmp4,12159:up Igf1,16000:up Ret,19713:up Tgfb2,21808:down Plpp3,67916:up Fgfr2,14183:up Kitl,17311:up Htr2b,15559:down Ccl9,20308:up Ccl6,20305:up Inhba,16323:down Aspn,66695:down Ccl3,20302:up Crlf1,12931:down Fabp4,11770:up Vegfa,22339:down Htr2a,15558:down Lrrc15,74488:down Igf2,16002:up Gas6,14456:up Tnf,21926:up Fgfr1,14182:down Egfr,13649:down Sfrp1,20377:up C1qtnf3,81799:down Cd4,12504:up Grem1,23892:up Ccl8,20307:up Ceacam1,26365:up Sfrp2,20319:up Fam20a,208659:down Npnt,114249:up Prkar2b,19088:up Tnfrsf11b,18383:up Errf1,74155:down Enpp1,18605:down                                                                                                                                                                                                                                                                                                                                                                                                                                                                                                                                                                                                                                                                                                                                                                                                                                                                                                                                                                                                                                                                                                                                                                                                                                                                                                                                                                                                                                   |
| regulation of anatomical structure morphogenesis | GO:0022603 | 8.37E-12 | 5.98E-10 | Col5a2,12832:down Adm,11535:up Plxnd1,67784:up Ccl2,20296:up C3,12266:up Sema7a,20361:down Tnfrsf12a,27279:down Ddah1,69219:down Postn,50706:down Cx3cr1,13051:down Wnt5a,22418:down Bmpr1a,12166:down Ccl12,20293:up I1rn,16181:up Adipoq,11450:up Bmp4,12159:up Crabp2,12904:down Ccl9,17329:up Ret,19713:up Tgfb2,21808:down Fgfr2,14183:up F3,14066:up Thbs2,21826:down Cthrc1,68588:down Prl2c2,18811:up Ptk7,71461:down Aspn,66695:down Ccl3,20302:up Vdr,22337:down Srpx2,68792:down Cxl12,20315:up Vegfa,22339:down Adams12,239337:down Tnf,21926:up Fgfr1,14182:down Hmox1,15368:up Sfrp1,20377:up Has2,15117:down Sulf1,240725:down Tgfb3,21814:up Ptgs2,19225:down Grem1,23892:up Ccl8,20307:up Ceacam1,26365:up Sfrp2,20319:up Col5a1,12831:down Rspo2,239405:up Tnfrsf11b,18383:up                                                                                                                                                                                                                                                                                                                                                                                                                                                                                                                                                                                                                                                                                                                                                                                                                                                                                                                                                                                                                                                                                                                                                                                                                                                                                                                                                                                                                                                                                                                  |
| regulation of intracellular signal transduction  | GO:1902531 | 1.03E-11 | 7.30E-10 | Igfbp4,16010:up Flrt2,399558:down Sfrp4,20379:up Ccl7,20306:up Ccl2,20296:up C3,12266:up Pdgfc,54635:down Sema7a,20361:down Ankrd1,107765:down Clec4n,56620:up Igfbp3,16009:up Plk2,20620:down Akr1c18,105349:up Trf,22041:up Cd24a,12484:down Ncam1,17967:down Wnt5a,22418:down Ccl12,20293:up I1rn,16181:up Ccl4,20303:up Adipoq,11450:up Bmp4,12159:up Igf1,16000:up Ret,19713:up Tgfb2,21808:down Hpse,15442:up Ptgir,19222:up Creb3l1,26427:down Fgfr2,14183:up F3,14066:up I1rn,17082:down Kitl,17311:up Htr2b,15559:down Ccl9,20308:up Ccl6,20305:up Inhba,16323:down Aspn,66695:down Ccl3,20302:up Crlf1,12931:down Cxl12,20315:up Vegfa,22339:down Htr2a,15558:down Serpine2,20720:up Lrrc15,74488:down Igf2,16002:up Gas6,14456:up Tnf,21926:up Lmcd1,30937:up Fgfr1,14182:down Egfr,13649:down Hmox1,15368:up Sfrp1,20377:up C1qtnf3,81799:down Cd4,12504:up Ptgs2,19225:down Grem1,23892:up Col3a1,12825:down Ceacam1,26365:up Ccl8,20307:up Sfrp2,20319:up Npnt,114249:up Tnfrsf11b,18383:up Errf1,74155:down                                                                                                                                                                                                                                                                                                                                                                                                                                                                                                                                                                                                                                                                                                                                                                                                                                                                                                                                                                                                                                                                                                                                                                                                                                                                                       |

|                                              |            |          |          |                                                                                                                                                                                                                                                                                                                                                                                                                                                                                                                                                                                                                                                                                                                                                                                                                                                                                                                                                                                                                                                                                                                                                                                                                                                                                                                                                                                                                                                                                                       |
|----------------------------------------------|------------|----------|----------|-------------------------------------------------------------------------------------------------------------------------------------------------------------------------------------------------------------------------------------------------------------------------------------------------------------------------------------------------------------------------------------------------------------------------------------------------------------------------------------------------------------------------------------------------------------------------------------------------------------------------------------------------------------------------------------------------------------------------------------------------------------------------------------------------------------------------------------------------------------------------------------------------------------------------------------------------------------------------------------------------------------------------------------------------------------------------------------------------------------------------------------------------------------------------------------------------------------------------------------------------------------------------------------------------------------------------------------------------------------------------------------------------------------------------------------------------------------------------------------------------------|
| regulation of response to stress             | GO:0080134 | 1.10E-11 | 7.71E-10 | Clec2d,93694:up Sfrp4,20379:up Ccl7,20306:up Ccl2,20296:up C3,12266:up Ednrb,13618:up Sema7a,20361:down Ankrd1,107765:down Tnfrsf12a,27279:down Cx3cr1,13051:down Cd109,235505:down Trf,22041:up Cd24a,12484:down Wnt5a,22418:down Bmpr1a,12166:down Ccl12,20293:up Il1rn,16181:up Ccl4,20303:up Adipoq,11450:up Tgfb2,21808:down Sdf2l1,64136:up Hpse,15442:up Ppp3,67916:up Iffit1,15957:up Creb3l1,26427:down Il1r1l,17082:down Kng1,16644:up Hp,15439:up Ccl9,20308:up Ccl6,20305:up Aoa,27052:up Ccl3,20302:up Ctla2a,13024:down Fabp4,11770:up Cxl12,20315:up Vegfa,22339:down Mmp2,17390:down Serpine2,20720:up Adamts12,239337:down Igf2,16002:up Pparg,19016:up Tnf,21926:up Lmcd1,30937:up Egfr,13649:down Hmox1,15368:up Sfrp1,20377:up C1qtnf3,81799:down Ptgs2,19225:down Ccl8,20307:up Ceacam1,26365:up Sfrp2,20319:up Serpine1,12258:up Errfi1,74155:down                                                                                                                                                                                                                                                                                                                                                                                                                                                                                                                                                                                                                              |
| positive regulation of phosphorylation       | GO:0042327 | 1.19E-11 | 8.18E-10 | Igfbp4,16010:up Ccl7,20306:up Ccl2,20296:up C3,12266:up Pdgc,54635:down Ednrb,13618:up Sema7a,20361:down Igfbp3,16009:up Trf,22041:up Cd24a,12484:down Wnt5a,22418:down Bmpr1a,12166:down Ccl12,20293:up Il1rn,16181:up Ccl4,20303:up Adipoq,11450:up Bmp4,12159:up Igf1,16000:up Ret,19713:up Tgfb2,21808:down Ppp3,67916:up Fgfr2,14183:up Kitl,17311:up Htr2b,15559:down Ccl9,20308:up Ccl6,20305:up Inhba,16323:down Ccl3,20302:up Crlf1,12931:down Vegfa,22339:down Htr2a,15558:down Igf2,16002:up Gas6,14456:up Tnf,21926:up Fgfr1,14182:down Egfr,13649:down C1qtnf3,81799:down Cd4,12504:up Grem1,23892:up Ccl8,20307:up Ceacam1,26365:up Sfrp2,20319:up Fam20a,208659:down Tnfrsf11b,18383:up Npnt,114249:up                                                                                                                                                                                                                                                                                                                                                                                                                                                                                                                                                                                                                                                                                                                                                                                 |
| cellular response to tumor necrosis factor   | GO:0071356 | 1.78E-11 | 1.22E-09 | Ccl9,20308:up Ccl6,20305:up Ccl7,20306:up Ccl2,20296:up Ccl3,20302:up Ankrd1,107765:down Fabp4,11770:up Adamts12,239337:down Gas6,14456:up Tnf,21926:up Sfrp1,20377:up Ccl12,20293:up Ccl4,20303:up Adipoq,11450:up Ccl8,20307:up Npnt,114249:up                                                                                                                                                                                                                                                                                                                                                                                                                                                                                                                                                                                                                                                                                                                                                                                                                                                                                                                                                                                                                                                                                                                                                                                                                                                      |
| regulation of localization                   | GO:0032879 | 1.99E-11 | 1.35E-09 | Flrt2,399558:down Plxnd1,67784:up Sfrp4,20379:up C3,12266:up Ankrd1,107765:down Cx3cr1,13051:down Igfbp3,16009:up Trf,22041:up Cxl14,57266:down Wnt5a,22418:down Stc1,20855:up Il1rn,16181:up Maob,109731:up Adipoq,11450:up Bmp4,12159:up Igf1,16000:up Cxl9,17329:up Tgfb2,21808:down F3,14066:up Clec4e,56619:up Htr2b,15559:down Pr1c2,18811:up Efemp1,216616:up Dpys3,22240:down Vdr,22337:down Fam132b,227358:down Cxl12,20315:up Htr2a,15558:down Mmp2,17390:down Gas6,14456:up Egfr,13649:down Sfrp1,20377:up C1qtnf3,81799:down Tgfb3,21814:up Sncg,20618:up Fxyd2,11936:up Ceacam1,26365:up Sfrp2,20319:up S100a1,20193:up Iccl1,218333:down Ccl2,20296:up Pdgc,54635:down Ednrb,13618:up Figf,14205:up Mmp13,17386:up Sema7a,20361:down Gpm6b,14758:up Clec4n,56620:up Postn,50706:down Ptx3,19288:up Hvcn1,74096:up Ncam1,17967:down Ccl12,20293:up Bmpr1a,12166:down Ccl4,20303:up Ret,19713:up Ppp3,67916:up Kitl,17311:up Il1r1l,17082:down Lama2,16773:down Inhba,16323:down Ccl3,20302:up Srxp2,68792:down Vegfa,22339:down Serpine2,20720:up Lrrc15,74488:down Anpep,16790:up Kdelr3,105785:down Pparg,19016:up Tnf,21926:up Fxyd1,56188:up Glp1r,14652:down Fgfr1,14182:down Hmox1,15368:up Lpl,16956:up Has2,15117:down Sulf1,240725:down Cd4,12504:up Ptgs2,19225:down Grem1,23892:up Kcnj15,16516:down Col3a1,12825:down Enpp1,18605:down                                                                                                                                       |
| positive regulation of inflammatory response | GO:0050729 | 2.10E-11 | 1.39E-09 | Ccl9,20308:up Ccl6,20305:up Ccl7,20306:up Ccl2,20296:up C3,12266:up Ccl3,20302:up Fabp4,11770:up Tnf,21926:up Cd24a,12484:down Egfr,13649:down Ccl12,20293:up Wnt5a,22418:down Ptgs2,19225:down Ccl4,20303:up Ccl8,20307:up Il1r1l,17082:down                                                                                                                                                                                                                                                                                                                                                                                                                                                                                                                                                                                                                                                                                                                                                                                                                                                                                                                                                                                                                                                                                                                                                                                                                                                         |
| biological adhesion                          | GO:0022610 | 2.10E-11 | 1.39E-09 | Fstl3,83554:down Flrt2,399558:down Ly9,17085:up Ccl2,20296:up Tnfrsf12a,27279:down Gpm6b,14758:up Postn,50706:down Cx3cr1,13051:down Ibsp,15891:up Cd24a,12484:down Ncam1,17967:down Adam12,11489:down Wnt5a,22418:down Wisp1,22402:down Il1rn,16181:up Col8a1,12837:down Adipoq,11450:up Bmp4,12159:up Igf1,16000:up Tnc,21923:down Col12a1,12816:down Ret,19713:up Tgfb2,21808:down Hpse,15442:up Ppp3,67916:up Thbs2,21826:down Clec4e,56619:up Kitl,17311:up Lama2,16773:down Ptck7,71461:down Ninj1,18081:up Tmem8,60455:up Ctla2a,13024:down Srxp2,68792:down Sned1,208777:up Cxl12,20315:up Vegfa,22339:down Mmp2,17390:down Serpine2,20720:up Adamts12,239337:down Lrrc15,74488:down Smoc2,64074:down Igf2,16002:up Gas6,14456:up Tnf,21926:up Egfr,13649:down Has2,15117:down Sfrp1,20377:up Cd4,12504:up Tfrc,22042:up Grem1,23892:up Col3a1,12825:down Ceacam1,26365:up Pcdh19,279653:down Col5a1,12831:down Emb,13723:up Npnt,114249:up Cdsn,386463:up Tnfsf9,21950:up                                                                                                                                                                                                                                                                                                                                                                                                                                                                                                                    |
| collagen fibril organization                 | GO:0030199 | 2.21E-11 | 1.44E-09 | P4ha1,18451:down Col5a2,12832:down Loxl2,94352:down Col1a2,12843:down Col11a1,12814:down Grem1,23892:up Col3a1,12825:down Serpinh1,12406:down Sfrp2,20319:up Col5a1,12831:down Tgfb2,21808:down                                                                                                                                                                                                                                                                                                                                                                                                                                                                                                                                                                                                                                                                                                                                                                                                                                                                                                                                                                                                                                                                                                                                                                                                                                                                                                       |
| regulation of signaling                      | GO:0023051 | 2.25E-11 | 1.45E-09 | Fstl3,83554:down Igfbp4,16010:up Adm,11535:up Flrt2,399558:down Sfrp4,20379:up C3,12266:up Ankrd1,107765:down Cx3cr1,13051:down Igfbp3,16009:up Cd109,235505:down Plk2,20620:down Trf,22041:up Cd24a,12484:down Wnt5a,22418:down Il1rn,16181:up Adipoq,11450:up Bmp4,12159:up Igf1,16000:up Crabp2,12904:down Tgfb2,21808:down Hpse,15442:up Ptgir,19222:up Fgfr2,14183:up F3,14066:up Cthrc1,68588:down Htr2b,15559:down Ccl6,20305:up Aspn,66695:down Cxl12,20315:up Htr2a,15558:down Gas6,14456:up Egfr,13649:down Sfrp1,20377:up C1qtnf3,81799:down Tgfb3,21814:up Sncg,20618:up Ceacam1,26365:up Ccl8,20307:up Sfrp2,20319:up Rspo2,239405:up Npnt,114249:up Tnfrsf11b,18383:up Ccl2,20296:up Ccl7,20306:up Pdgc,54635:down Figf,14205:up Sema7a,20361:down Htra3,78558:down Tnfrsf12a,27279:down Gpm6b,14758:up Clec4n,56620:up Postn,50706:down Akr1c18,105349:up Ncam1,17967:down Ccl12,20293:up Bmpr1a,12166:down Ccl4,20303:up Chst11,58250:down Ret,19713:up Sdf2l1,64136:up Aldh1a3,56847:down Ppp3,67916:up Creb3l1,26427:down Kitl,17311:up Il1r1l,17082:down Ccl9,20308:up Lama2,16773:down Inhba,16323:down Ccl3,20302:up Crlf1,12931:down Vegfa,22339:down Serpine2,20720:up Adamts12,239337:down Lrrc15,74488:down Igf2,16002:up Nxn,18230:down Pparg,19016:up Tnf,21926:up Lmcd1,30937:up Glp1r,14652:down Tnfrsf23,79201:down Fgfr1,14182:down Hmox1,15368:up Sulf1,240725:down Cd4,12504:up Ptgs2,19225:down Grem1,23892:up Col3a1,12825:down Errfi1,74155:down Enpp1,18605:down |
| epithelial cell proliferation                | GO:0050673 | 2.26E-11 | 1.45E-09 | Htr2b,15559:down Igfbp4,16010:up Ccl2,20296:up Aldh1a2,19378:up Ednrb,13618:up Vdr,22337:down Cxl12,20315:up Vegfa,22339:down Igfbp3,16009:up Cd109,235505:down Tnf,21926:up Loxl2,94352:down Egfr,13649:down Has2,15117:down Sfrp1,20377:up Sulf1,240725:down Wnt5a,22418:down Tgfb3,21814:up Bmpr1a,12166:down Col8a1,12837:down Bmp4,12159:up Igf1,16000:up Ceacam1,26365:up Sfrp2,20319:up Tgfb2,21808:down Errfi1,74155:down Fgfr2,14183:up F3,14066:up                                                                                                                                                                                                                                                                                                                                                                                                                                                                                                                                                                                                                                                                                                                                                                                                                                                                                                                                                                                                                                          |

|                                                      |            |          |          |                                                                                                                                                                                                                                                                                                                                                                                                                                                                                                                                                                                                                                                                                                                                                                                                                                                                                                                                                                                                                                                                                                                                                                                                                                                                                                                                                                                                                                                                                                       |
|------------------------------------------------------|------------|----------|----------|-------------------------------------------------------------------------------------------------------------------------------------------------------------------------------------------------------------------------------------------------------------------------------------------------------------------------------------------------------------------------------------------------------------------------------------------------------------------------------------------------------------------------------------------------------------------------------------------------------------------------------------------------------------------------------------------------------------------------------------------------------------------------------------------------------------------------------------------------------------------------------------------------------------------------------------------------------------------------------------------------------------------------------------------------------------------------------------------------------------------------------------------------------------------------------------------------------------------------------------------------------------------------------------------------------------------------------------------------------------------------------------------------------------------------------------------------------------------------------------------------------|
| regulation of phosphorylation                        | GO:0042325 | 3.73E-11 | 2.36E-09 | Igfbp4,16010:up Flrt2,399558:down Sfrp4,20379:up Ccl7,20306:up Ccl2,20296:up C3,12266:up Pdgfc,54635:down Ednrb,13618:up Sema7a,20361:down Igfbp3,16009:up Cd109,235505:down Trf,22041:up Cd24a,12484:down Wnt5a,22418:down Bmpr1a,12166:down Ccl12,20293:up Il1rn,16181:up Ccl4,20303:up Adipoq,11450:up Bmp4,12159:up Igf1,16000:up Ret,19713:up Tgfb2,21808:down Ppp3,67916:up Fgf2,14183:up Kitl,17311:up Htr2b,15559:down Ccl9,20308:up Ccl6,20305:up Inhba,16323:down Aspn,66695:down Ccl3,20302:up Sprx2,68792:down Crif1,12931:down Fabp4,11770:up Vegfa,22339:down Htr2a,15558:down Lrrc15,74488:down Igf2,16002:up Gas6,14456:up Tnf,21926:up Fgfr1,14182:down Egfr,13649:down Sfrp1,20377:up C1qtnf3,81799:down Cd4,12504:up Grem1,23892:up Ccl8,20307:up Ceacam1,26365:up Sfrp2,20319:up Fam20a,208659:down Npnt,114249:up Prkar2b,19088:up Tnfrsf11b,18383:up Errfi1,74155:down Enpp1,18605:down                                                                                                                                                                                                                                                                                                                                                                                                                                                                                                                                                                                         |
| biomineral tissue development                        | GO:0031214 | 3.87E-11 | 2.38E-09 | Fam101b,76566:down Mgp,17313:up Aspn,66695:down Mmp13,17386:up Gpm6b,14758:up Ibsp,15891:up Gas6,14456:up Bmpr1a,12166:down Prgs2,19225:down Grem1,23892:up Bmp4,12159:up Igf1,16000:up Ank,11732:down Rspo2,239405:up Fam20a,208659:down Fgfr2,14183:up Enpp1,18605:down                                                                                                                                                                                                                                                                                                                                                                                                                                                                                                                                                                                                                                                                                                                                                                                                                                                                                                                                                                                                                                                                                                                                                                                                                             |
| regulation of cell communication                     | GO:0010646 | 3.88E-11 | 2.38E-09 | Fstl3,83554:down Igfbp4,16010:up Adm,11535:up Flrt2,399558:down Sfrp4,20379:up C3,12266:up Ankrd1,107765:down Cx3cr1,13051:down Igfbp3,16009:up Cd109,235505:down Plk2,20620:down Trf,22041:up Cd24a,12484:down Wnt5a,22418:down Il1rn,16181:up Adipoq,11450:up Bmp4,12159:up Igf1,16000:up Crabp2,12904:down Tgfb2,21808:down Hpse,15442:up Ptgir,19222:up Fgfr2,14183:up F3,14066:up Cthrc1,68588:down Htr2b,15559:down Ccl6,20305:up Aspn,66695:down Cxl12,20315:up Htr2a,15558:down Gas6,14456:up Egfr,13649:down Sfrp1,20377:up C1qtnf3,81799:down Tgfb3,21814:up Snog,20618:up Ceacam1,26365:up Ccl8,20307:up Sfrp2,20319:up Rspo2,239405:up Npnt,114249:up Tnfrsf11b,18383:up Ccl2,20296:up Ccl7,20306:up Pdgfc,54635:down Figf,14205:up Sema7a,20361:down Htra3,78558:down Tnfrsf12a,27279:down Gpm6b,14758:up Clec4n,56620:up Postn,50706:down Akr1c18,105349:up Ncam1,17967:down Ccl12,20293:up Bmpr1a,12166:down Ccl4,20303:up Cst11,58250:down Ret,19713:up Sdf2l1,64136:up Aldh1a3,56847:down Ppp3,67916:up Creb3l1,26427:down Kitl,17311:up Il1rl1,17082:down Ccl9,20308:up Lama2,16773:down Inhba,16323:down Ccl3,20302:up Crif1,12931:down Vegfa,22339:down Serpine2,20720:up Adamts12,239337:down Lrrc15,74488:down Igf2,16002:up Nxn,18230:down Pparg,19016:up Tnf,21926:up Lmcd1,30937:up Glp1r,14652:down Tnfrsf23,79201:down Fgfr1,14182:down Hmox1,15368:up Sulf1,240725:down Cd4,12504:up Prgs2,19225:down Grem1,23892:up Col3a1,12825:down Errfi1,74155:down Enpp1,18605:down |
| lymphocyte chemotaxis                                | GO:0048247 | 4.29E-11 | 2.61E-09 | Gas6,14456:up Cxl14,57266:down Ccl9,20308:up Ccl6,20305:up Wnt5a,22418:down Ccl7,20306:up Ccl2,20296:up Ccl12,20293:up Ccl4,20303:up Ccl3,20302:up Ccl8,20307:up                                                                                                                                                                                                                                                                                                                                                                                                                                                                                                                                                                                                                                                                                                                                                                                                                                                                                                                                                                                                                                                                                                                                                                                                                                                                                                                                      |
| cell surface receptor signaling pathway              | GO:0007166 | 4.43E-11 | 2.66E-09 | Fstl3,83554:down Igfbp4,16010:up Adm,11535:up Flrt2,399558:down Hpgd,15446:up Plxnd1,67784:up Sfrp4,20379:up C3,12266:up Cx3cr1,13051:down Igfbp3,16009:up Cd109,235505:down Trf,22041:up Cd24a,12484:down Wnt5a,22418:down Mark1,226778:up Il1rn,16181:up Adipoq,11450:up Bmp4,12159:up Igf1,16000:up Cxl9,17329:up Tgfb2,21808:down Ptgir,19222:up F3,14066:up Fgfr2,14183:up Clec4e,56619:up Cthrc1,68588:down Htr2b,15559:down Efemp1,216616:up Ccl6,20305:up Aspn,66695:down Cxcr6,80901:down Cxl12,20315:up Htr2a,15558:down Gas6,14456:up Egfr,13649:down Sfrp1,20377:up Tgfb3,21814:up Ceacam1,26365:up Ccl8,20307:up Sfrp2,20319:up Rspo2,239405:up Npnt,114249:up Ccl2,20296:up Ccl7,20306:up Pdgfc,54635:down Ednrb,13618:up Figf,14205:up Sema7a,20361:down Slc29a1,63959:up Htra3,78558:down Tnfrsf12a,27279:down Postn,50706:down Dok2,13449:up Akr1c18,105349:up Ncam1,17967:down Ccl12,20293:up Bmpr1a,12166:down Wisp1,22402:down Ccl4,20303:up Cst11,58250:down Ret,19713:up Ppp3,67916:up Kitl,17311:up Ccl9,20308:up Hp,15439:up Ptk7,71461:down Inhba,16323:down Plat,18791:down Ccl3,20302:up Vegfa,22339:down Serpine2,20720:up Adamts12,239337:down Lrrc15,74488:down Igf2,16002:up Nxn,18230:down Pparg,19016:up Tnf,21926:up Col1a2,12843:down Glp1r,14652:down Tnfrsf23,79201:down Fgfr1,14182:down Hmox1,15368:up Sulf1,240725:down Cd4,12504:up Grem1,23892:up Col3a1,12825:down Errfi1,74155:down Enpp1,18605:down                                                      |
| positive regulation of response to external stimulus | GO:0032103 | 4.99E-11 | 2.96E-09 | Ccl9,20308:up Ccl6,20305:up Ccl7,20306:up Ccl2,20296:up C3,12266:up Figf,14205:up Ccl3,20302:up Fabp4,11770:up Cxl12,20315:up Vegfa,22339:down Gas6,14456:up Tnf,21926:up Cxl14,57266:down Fgfr1,14182:down Egfr,13649:down Cd24a,12484:down Hmox1,15368:up Wnt5a,22418:down Ccl12,20293:up Prgs2,19225:down Ccl4,20303:up Ccl8,20307:up Cxl9,17329:up Il1rl1,17082:down                                                                                                                                                                                                                                                                                                                                                                                                                                                                                                                                                                                                                                                                                                                                                                                                                                                                                                                                                                                                                                                                                                                              |
| cell adhesion                                        | GO:0007155 | 5.03E-11 | 2.96E-09 | Fstl3,83554:down Flrt2,399558:down Ly9,17085:up Ccl2,20296:up Tnfrsf12a,27279:down Gpm6b,14758:up Postn,50706:down Cx3cr1,13051:down Ibsp,15891:up Cd24a,12484:down Ncam1,17967:down Adam12,11489:down Wnt5a,22418:down Wisp1,22402:down Il1rn,16181:up Col8a1,12837:down Adipoq,11450:up Bmp4,12159:up Igf1,16000:up Tnc,21923:down Col12a1,12816:down Igf2,21808:down Hpse,15442:up Ppp3,67916:up Thbs2,21826:down Clec4e,56619:up Kitl,17311:up Lama2,16773:down Ptk7,71461:down Ninj1,18081:up Tmem8,60455:up Ctla2a,13024:down Sprx2,68792:down Sned1,208777:up Cxl12,20315:up Vegfa,22339:down Mmp2,17390:down Serpine2,20720:up Adamts12,239337:down Smoc2,64074:down Igf2,16002:up Gas6,14456:up Tnf,21926:up Egfr,13649:down Has2,15117:down Sfrp1,20377:up Cd4,12504:up Tfrc,22042:up Grem1,23892:up Col3a1,12825:down Ceacam1,26365:up Pcdh19,279653:down Col5a1,12831:down Emb,13723:up Npnt,114249:up Cdsn,386463:up Tnfsf9,21950:up                                                                                                                                                                                                                                                                                                                                                                                                                                                                                                                                                     |
| positive regulation of phosphate metabolic process   | GO:0045937 | 5.65E-11 | 3.27E-09 | Igfbp4,16010:up Adm,11535:up Ccl7,20306:up Ccl2,20296:up C3,12266:up Pdgfc,54635:down Ednrb,13618:up Sema7a,20361:down Igfbp3,16009:up Trf,22041:up Cd24a,12484:down Wnt5a,22418:down Bmpr1a,12166:down Ccl12,20293:up Il1rn,16181:up Ccl4,20303:up Adipoq,11450:up Bmp4,12159:up Igf1,16000:up Ret,19713:up Tgfb2,21808:down Ppp3,67916:up Ptgir,19222:up Fgfr2,14183:up Kitl,17311:up Htr2b,15559:down Ccl9,20308:up Ccl6,20305:up Inhba,16323:down Ccl3,20302:up Crif1,12931:down Vegfa,22339:down Htr2a,15558:down Igf2,16002:up Gas6,14456:up Tnf,21926:up Fgfr1,14182:down Egfr,13649:down C1qtnf3,81799:down Cd4,12504:up Grem1,23892:up Ccl8,20307:up Ceacam1,26365:up Sfrp2,20319:up Fam20a,208659:down Tnfrsf11b,18383:up Npnt,114249:up                                                                                                                                                                                                                                                                                                                                                                                                                                                                                                                                                                                                                                                                                                                                                    |
| positive regulation of phosphorus metabolic process  | GO:0010562 | 5.65E-11 | 3.27E-09 | Igfbp4,16010:up Adm,11535:up Ccl7,20306:up Ccl2,20296:up C3,12266:up Pdgfc,54635:down Ednrb,13618:up Sema7a,20361:down Igfbp3,16009:up Trf,22041:up Cd24a,12484:down Wnt5a,22418:down Bmpr1a,12166:down Ccl12,20293:up Il1rn,16181:up Ccl4,20303:up Adipoq,11450:up Bmp4,12159:up Igf1,16000:up Ret,19713:up Tgfb2,21808:down Ppp3,67916:up Ptgir,19222:up Fgfr2,14183:up Kitl,17311:up Htr2b,15559:down Ccl9,20308:up Ccl6,20305:up Inhba,16323:down Ccl3,20302:up Crif1,12931:down Vegfa,22339:down Htr2a,15558:down Igf2,16002:up Gas6,14456:up Tnf,21926:up Fgfr1,14182:down Egfr,13649:down C1qtnf3,81799:down Cd4,12504:up Grem1,23892:up Ccl8,20307:up Ceacam1,26365:up Sfrp2,20319:up Fam20a,208659:down Tnfrsf11b,18383:up Npnt,114249:up                                                                                                                                                                                                                                                                                                                                                                                                                                                                                                                                                                                                                                                                                                                                                    |

|                                              |            |          |          |                                                                                                                                                                                                                                                                                                                                                                                                                                                                                                                                                                                                                                                                                                                                                                                                                                                                                                                                                                                                                                                                                                                                                                                                                                                                                                                                                                                                                                                                                                                                                                                                                                                                                                                                                                                                                                                                                                                                                                                                                                                                                                                                                                                                                                                                                                                                                                                                                                                                                                                                                                                                                                                                                                                                              |
|----------------------------------------------|------------|----------|----------|----------------------------------------------------------------------------------------------------------------------------------------------------------------------------------------------------------------------------------------------------------------------------------------------------------------------------------------------------------------------------------------------------------------------------------------------------------------------------------------------------------------------------------------------------------------------------------------------------------------------------------------------------------------------------------------------------------------------------------------------------------------------------------------------------------------------------------------------------------------------------------------------------------------------------------------------------------------------------------------------------------------------------------------------------------------------------------------------------------------------------------------------------------------------------------------------------------------------------------------------------------------------------------------------------------------------------------------------------------------------------------------------------------------------------------------------------------------------------------------------------------------------------------------------------------------------------------------------------------------------------------------------------------------------------------------------------------------------------------------------------------------------------------------------------------------------------------------------------------------------------------------------------------------------------------------------------------------------------------------------------------------------------------------------------------------------------------------------------------------------------------------------------------------------------------------------------------------------------------------------------------------------------------------------------------------------------------------------------------------------------------------------------------------------------------------------------------------------------------------------------------------------------------------------------------------------------------------------------------------------------------------------------------------------------------------------------------------------------------------------|
| response to stimulus                         | GO:0050896 | 7.59E-11 | 4.30E-09 | Fstl3,83554:down lgfbp4,16010:up Adm,11535:up Flrt2,399558:down Plxnd1,67784:up Tfec,21426:up Sfrp4,20379:up Gstt1,14871:up lgfbp3,16009:up lbsp,15891:up Plk2,20620:down Cd24a,12484:down Mme,17380:up l1rn,16181:up Bmp4,12159:up Oasl1,231655:up Hpse,15442:up Ptgir,19222:up Fgfr2,14183:up Htr2b,15559:down Ccl6,20305:up Anxa8,11752:down Sipi,20568:up Aspn,66695:down Mt2,17750:up Cxcr6,80901:down Nabp1,109019:down Phf11a,219131:up Mmp2,17390:down Oas3,246727:up Pappa,18491:down Slc40a1,53945:up Egfr,13649:down Alpl,11647:up C1rb,667277:up Tfrc,22042:up Ccl8,20307:up Gstm1,14862:up Serpina3g,20715:up Rspo2,239405:up Mt1,17748:up Col5a2,12832:down Mrc1,17533:up Aldh1a2,19378:up Ccl2,20296:up Ednrb,13618:up Htra3,78558:down Tnfrsf12a,27279:down Uchl5,56207:up Sord,20322:up Clec4n,56620:up Enpp3,209558:down Cdo1,12583:up Dok2,13449:up Hvcn1,74096:up Ptx3,19288:up Ncam1,17967:down Ccl4,20303:up Chst11,58250:down Aldh1a3,56847:down Plpp3,67916:up Lama2,16773:down Ccl9,20308:up Ptk7,71461:down Inhba,16323:down Tfpi2,21789:down Crlf1,12931:down C1s1,50908:up Plod2,26432:down Vegfa,22339:down Serpine2,20720:up Nxn,18230:down lgf2,16002:up Tnf,21926:up Col1a2,12843:down Fgfr1,14182:down Sulf1,240725:down Sud2,71733:up Cd4,12504:up Col3a1,12825:down Serping1,12258:up Enpp1,18605:down Clec2d,93694:up Hpgd,15446:up C3,12266:up Ankrd1,107765:down Cx3cr1,13051:down Cd109,235505:down Ggt5,23887:up Loxl2,94352:down Trf,22041:up Cxcl14,57266:down Wnt5a,22418:down Mark1,226778:up Adipoq,11450:up lgf1,16000:up Crapb2,12904:down Cxcl9,17329:up Tgfb2,21808:down F3,14066:up Clec4e,56619:up Adamts4,240913:down Cthrc1,68588:down Kng1,16644:up Efemp1,216616:up Ninj1,18081:up Saa3,20210:up Vdr,22337:down Pdia5,72599:down Fabp4,11770:up Cxcl12,20315:up Htr2a,15558:down Smoc2,64074:down Gas6,14456:up Col11a1,12814:down Sfrp1,20377:up C1qtnf3,81799:down Tgfb3,21814:up Ceacam1,26365:up Sfrp2,20319:up Pxdn,69675:down Tnfrsf11b,18383:up Npnt,114249:up Ly9,17085:up Ccl7,20306:up Pdgc,54635:down Figf,14205:up ffit3,15959:up Epas1,13819:up Slc29a1,63959:up Sema7a,20361:down Postn,50706:down Hspb7,29818:up Akr1c18,105349:up Ccl12,20293:up Bmpr1a,12166:down Wisp1,22402:down Tnc,21923:down Gatm,67092:down Ret,19713:up Prg4,96875:down Sdf21,64136:up C1s2,317677:up ffit1,15957:up Creb3l1,26427:down Kitl,17311:up l1r1,17082:down Hp,15439:up Aoah,27052:up Rasl11a,68895:up Ccl3,20302:up Plat,18791:down Ctla2a,13024:down Adamts12,239337:down Lrrc15,74488:down Pparg,19016:up Lmcd1,30937:up Glp1r,14652:down Tnfrsf23,79201:down Hmox1,15368:up Has2,15117:down Ptgs2,19225:down Grem1,23892:up Col5a1,12831:down Errfi1,74155:down Tnfsf9,21950:up |
| ERK1 and ERK2 cascade                        | GO:0070371 | 7.65E-11 | 4.30E-09 | Htr2b,15559:down Ccl9,20308:up Ccl6,20305:up Ccl7,20306:up Ccl2,20296:up C3,12266:up Pdgc,54635:down Ccl3,20302:up Sema7a,20361:down Htr2a,15558:down Gas6,14456:up Trf,22041:up Egfr,13649:down C1qtnf3,81799:down Ccl12,20293:up Ccl4,20303:up Adipoq,11450:up Bmp4,12159:up lgf1,16000:up Ccl8,20307:up Npnt,114249:up Errfi1,74155:down Fgfr2,14183:up                                                                                                                                                                                                                                                                                                                                                                                                                                                                                                                                                                                                                                                                                                                                                                                                                                                                                                                                                                                                                                                                                                                                                                                                                                                                                                                                                                                                                                                                                                                                                                                                                                                                                                                                                                                                                                                                                                                                                                                                                                                                                                                                                                                                                                                                                                                                                                                   |
| mesenchymal cell differentiation             | GO:0048762 | 8.18E-11 | 4.56E-09 | Fam101b,76566:down Htr2b,15559:down Aldh1a2,19378:up Ednrb,13618:up Sema7a,20361:down Loxl2,94352:down Loxl3,16950:down Fgfr1,14182:down Sfrp1,20377:up Has2,15117:down Wnt5a,22418:down Tgfb3,21814:up Bmpr1a,12166:down Grem1,23892:up Bmp4,12159:up Sfrp2,20319:up Ret,19713:up Tgfb2,21808:down Fgfr2,14183:up Kitl,17311:up                                                                                                                                                                                                                                                                                                                                                                                                                                                                                                                                                                                                                                                                                                                                                                                                                                                                                                                                                                                                                                                                                                                                                                                                                                                                                                                                                                                                                                                                                                                                                                                                                                                                                                                                                                                                                                                                                                                                                                                                                                                                                                                                                                                                                                                                                                                                                                                                             |
| positive regulation of ERK1 and ERK2 cascade | GO:0070374 | 8.51E-11 | 4.69E-09 | Htr2b,15559:down Ccl9,20308:up Ccl6,20305:up Ccl7,20306:up Ccl2,20296:up C3,12266:up Pdgc,54635:down Ccl3,20302:up Sema7a,20361:down Htr2a,15558:down Gas6,14456:up Egfr,13649:down C1qtnf3,81799:down Ccl12,20293:up Ccl4,20303:up Bmp4,12159:up Ccl8,20307:up Npnt,114249:up Fgfr2,14183:up                                                                                                                                                                                                                                                                                                                                                                                                                                                                                                                                                                                                                                                                                                                                                                                                                                                                                                                                                                                                                                                                                                                                                                                                                                                                                                                                                                                                                                                                                                                                                                                                                                                                                                                                                                                                                                                                                                                                                                                                                                                                                                                                                                                                                                                                                                                                                                                                                                                |
| cartilage development                        | GO:0051216 | 9.49E-11 | 5.19E-09 | Fam101b,76566:down Efemp1,216616:up Mgp,17313:up Mmp13,17386:up Serpinh1,12406:down Adamts12,239337:down Loxl2,94352:down Col11a1,12814:down Fgfr1,14182:down Sulf1,240725:down Bmpr1a,12166:down Wnt5a,22418:down Stc1,20855:up Grem1,23892:up Bmp4,12159:up Chst11,58250:down Sfrp2,20319:up Rspo2,239405:up Tgfb2,21808:down                                                                                                                                                                                                                                                                                                                                                                                                                                                                                                                                                                                                                                                                                                                                                                                                                                                                                                                                                                                                                                                                                                                                                                                                                                                                                                                                                                                                                                                                                                                                                                                                                                                                                                                                                                                                                                                                                                                                                                                                                                                                                                                                                                                                                                                                                                                                                                                                              |
| positive regulation of cell motility         | GO:2000147 | 1.14E-10 | 6.08E-09 | Prl2c2,18811:up Ccl2,20296:up Pdgc,54635:down Figf,14205:up Sema7a,20361:down Srxp2,68792:down Cxcl12,20315:up Postn,50706:down Vegfa,22339:down Mmp2,17390:down Lrrc15,74488:down Gas6,14456:up Trf,22041:up Cxcl14,57266:down Fgfr1,14182:down Egfr,13649:down Has2,15117:down Wnt5a,22418:down Ccl12,20293:up Ptgs2,19225:down Ccl4,20303:up Bmp4,12159:up lgf1,16000:up Cxcl9,17329:up Ret,19713:up Tgfb2,21808:down Plpp3,67916:up F3,14066:up Kitl,17311:up                                                                                                                                                                                                                                                                                                                                                                                                                                                                                                                                                                                                                                                                                                                                                                                                                                                                                                                                                                                                                                                                                                                                                                                                                                                                                                                                                                                                                                                                                                                                                                                                                                                                                                                                                                                                                                                                                                                                                                                                                                                                                                                                                                                                                                                                            |
| positive regulation of response to wounding  | GO:1903036 | 1.15E-10 | 6.08E-09 | Ccl9,20308:up Ccl6,20305:up Ccl7,20306:up Ccl2,20296:up C3,12266:up Ccl3,20302:up Fabp4,11770:up Tnf,21926:up Cd24a,12484:down Egfr,13649:down Wnt5a,22418:down Ccl12,20293:up Ptgs2,19225:down Ccl4,20303:up Ccl8,20307:up Hpse,15442:up Plpp3,67916:up l1r1,17082:down                                                                                                                                                                                                                                                                                                                                                                                                                                                                                                                                                                                                                                                                                                                                                                                                                                                                                                                                                                                                                                                                                                                                                                                                                                                                                                                                                                                                                                                                                                                                                                                                                                                                                                                                                                                                                                                                                                                                                                                                                                                                                                                                                                                                                                                                                                                                                                                                                                                                     |
| mesenchyme development                       | GO:0060485 | 1.15E-10 | 6.08E-09 | Fam101b,76566:down Htr2b,15559:down Ptk7,71461:down Aldh1a2,19378:up Ednrb,13618:up Bnc2,242509:down Sema7a,20361:down Loxl2,94352:down Loxl3,16950:down Fgfr1,14182:down Sfrp1,20377:up Has2,15117:down Wnt5a,22418:down Tgfb3,21814:up Bmpr1a,12166:down Grem1,23892:up Bmp4,12159:up Sfrp2,20319:up Ret,19713:up Tgfb2,21808:down Fgfr2,14183:up Kitl,17311:up                                                                                                                                                                                                                                                                                                                                                                                                                                                                                                                                                                                                                                                                                                                                                                                                                                                                                                                                                                                                                                                                                                                                                                                                                                                                                                                                                                                                                                                                                                                                                                                                                                                                                                                                                                                                                                                                                                                                                                                                                                                                                                                                                                                                                                                                                                                                                                            |
| cellular developmental process               | GO:0048869 | 1.37E-10 | 7.16E-09 | Fstl3,83554:down Clec2d,93694:up Adm,11535:up Flrt2,399558:down Tmem176b,65963:up Plxnd1,67784:up Sfrp4,20379:up Ankrd1,107765:down Serpinh1,12406:down Lyl1,17095:up Cx3cr1,13051:down lgfbp3,16009:up lbsp,15891:up Cd109,235505:down Loxl2,94352:down Plk2,20620:down Loxl3,16950:down Trf,22041:up Cxcl14,57266:down Cd24a,12484:down Wnt5a,22418:down Mark1,226778:up Stc1,20855:up Adipoq,11450:up Bmp4,12159:up lgf1,16000:up Crabp2,12904:down Cxc9,17329:up Tgfb2,21808:down M edag,70717:down Fgfr2,14183:up Clec4e,56619:up Cthrc1,68588:down Htr2b,15559:down Prl2c2,18811:up Efemp1,216616:up Gjb5,14622:down Dpysl3,22240:down Vdr,22337:down Fabp4,11770:up Cxcl12,20315:up Htr2a,15558:down Mmp2,17390:down Gas6,14456:up Egfr,13649:down Col11a1,12814:down Alpl,11647:up Sfrp1,20377:up Tgfb3,21814:up Tfrc,22042:up Tll1,21892:down Ceacam1,26365:up Ccl8,20307:up Sfrp2,20319:up Rspo2,239405:up Npnt,114249:up Col5a2,12832:down Ly9,17085:up Aldh1a2,19378:up Ccl2,20296:up Ednrb,13618:up Figf,14205:up Mgp,17313:up Sema7a,20361:down Epas1,13819:up Tnfrsf12a,27279:down Postn,50706:down Csrp2,13008:down Ncam1,17967:down Ccl12,20293:up Bmpr1a,12166:down Wisp1,22402:down Chst11,58250:down Tnc,21923:down Ret,19713:up Vegfb,22340:up Plpp3,67916:up Creb3l1,26427:down Mrc2,17534:down Kitl,17311:up Fam101b,76566:down Lrrc17,74511:down Lama2,16773:down Ccl9,20308:up Ptk7,71461:down Inhba,16323:down Ccl3,20302:up Ctla2a,13024:down Prepl,116847:up Vegfa,22339:down Serpine2,20720:up Adamts12,239337:down Nxn,18230:down lgf2,16002:up Anpep,16790:up Pparg,19016:up Tnf,21926:up Tmem176a,66058:up Glp1r,14652:down Fgfr1,14182:down Has2,15117:down Lpl,16956:up Sulf1,240725:down Cd4,12504:up Ptgs2,19225:down Grem1,23892:up Col3a1,12825:down Mcoln3,171166:up Col5a1,12831:down Errfi1,74155:down Enpp1,18605:down Tnfsf9,21950:up                                                                                                                                                                                                                                                                                                                                                                                                                                                                                                                                                                                                                                                                                                                                                                                                                                                             |
| regulation of ERK1 and ERK2 cascade          | GO:0070372 | 1.49E-10 | 7.74E-09 | Htr2b,15559:down Ccl9,20308:up Ccl6,20305:up Ccl7,20306:up Ccl2,20296:up C3,12266:up Pdgc,54635:down Ccl3,20302:up Sema7a,20361:down Htr2a,15558:down Gas6,14456:up Egfr,13649:down C1qtnf3,81799:down Ccl12,20293:up Ccl4,20303:up Adipoq,11450:up Bmp4,12159:up lgf1,16000:up Ccl8,20307:up Npnt,114249:up Errfi1,74155:down Fgfr2,14183:up                                                                                                                                                                                                                                                                                                                                                                                                                                                                                                                                                                                                                                                                                                                                                                                                                                                                                                                                                                                                                                                                                                                                                                                                                                                                                                                                                                                                                                                                                                                                                                                                                                                                                                                                                                                                                                                                                                                                                                                                                                                                                                                                                                                                                                                                                                                                                                                                |



|                                                    |            |          |          |                                                                                                                                                                                                                                                                                                                                                                                                                                                                                                                                                                                                                                                                                                                                                                                                                                                             |
|----------------------------------------------------|------------|----------|----------|-------------------------------------------------------------------------------------------------------------------------------------------------------------------------------------------------------------------------------------------------------------------------------------------------------------------------------------------------------------------------------------------------------------------------------------------------------------------------------------------------------------------------------------------------------------------------------------------------------------------------------------------------------------------------------------------------------------------------------------------------------------------------------------------------------------------------------------------------------------|
| response to tumor necrosis factor                  | GO:0034612 | 1.68E-10 | 8.64E-09 | Ccl9,20308:up Ccl6,20305:up Ccl7,20306:up Ccl2,20296:up Ccl3,20302:up Ankrd1,107765:down Fabp4,11770:up Adamts12,239337:down Gas6,14456:up Tnf,21926:up Sfrp1,20377:up Ccl12,20293:up Ccl4,20303:up Adipoq,11450:up Ccl8,20307:up Npnt,114249:up                                                                                                                                                                                                                                                                                                                                                                                                                                                                                                                                                                                                            |
| cellular response to growth factor stimulus        | GO:0071363 | 1.78E-10 | 9.07E-09 | Fstl3,83554:down Flrt2,399558:down Hpgd,15446:up Ccl2,20296:up Figf,14205:up Aspn,66695:down Ankrd1,107765:down Htra3,78558:down Vegfa,22339:down Ibsp,15891:up Adamts12,239337:down Ccl109,235505:down Gas6,14456:up Akr1c18,105349:up Col1a2,12843:down Fgfr1,14182:down Egfr,13649:down Has2,15117:down Sfrp1,20377:up Sulf1,240725:down Wnt5a,22418:down Tgfb3,21814:up Bmpr1a,12166:down Grem1,23892:up Bmp4,12159:up Col3a1,12825:down Chst11,58250:down Sfrp2,20319:up Tgfb2,21808:down Npnt,114249:up Fgfr2,14183:up                                                                                                                                                                                                                                                                                                                                |
| osteoblast differentiation                         | GO:001649  | 1.81E-10 | 9.16E-09 | Cthrc1,68588:down Sema7a,20361:down Vegfa,22339:down Ibsp,15891:up Igf1,16000:up Igf2,16002:up Tnf,21926:up Alpl,11647:up Fgfr1,14182:down Sfrp1,20377:up Tgfb3,21814:up Bmpr1a,12166:down Bmp4,12159:up Igf1,16000:up Sfrp2,20319:up Tnc,21923:down Rspo2,239405:up Npnt,114249:up Creb31,26427:down Mrc2,17534:down                                                                                                                                                                                                                                                                                                                                                                                                                                                                                                                                       |
| cytokine-mediated signaling pathway                | GO:0019221 | 2.03E-10 | 1.02E-08 | Flrt2,399558:down Ccl9,20308:up Ccl6,20305:up Ccl7,20306:up Ccl2,20296:up Aspn,66695:down Ccl3,20302:up Ccl12,20293:up Cx3cr1,13051:down Lrrc15,74488:down Gas6,14456:up Pparg,19016:up Tnf,21926:up Cd24a,12484:down Wnt5a,22418:down Ccl12,20293:up Il1rn,16181:up Ccl4,20303:up Adipoq,11450:up Ceacam1,26365:up Ccl8,20307:up Cxc19,17329:up F3,14066:up                                                                                                                                                                                                                                                                                                                                                                                                                                                                                                |
| positive regulation of cellular component movement | GO:0051272 | 2.20E-10 | 1.10E-08 | Pr12c2,18811:up Ccl2,20296:up Pdgif,54635:down Figf,14205:up Sema7a,20361:down Srxp2,68792:down Cxc12,20315:up Postn,50706:down Vegfa,22339:down Mmp2,17390:down Lrrc15,74488:down Gas6,14456:up Trf,22041:up Cxc14,57266:down Fgfr1,14182:down Egfr,13649:down Has2,15117:down Wnt5a,22418:down Ccl12,20293:up Ptgs2,19225:down Ccl4,20303:up Bmp4,12159:up Igf1,16000:up Cxc19,17329:up Ret,19713:up Tgfb2,21808:down Plpp3,67916:up F3,14066:up Kitl,17311:up                                                                                                                                                                                                                                                                                                                                                                                            |
| positive regulation of cell migration              | GO:0030335 | 2.36E-10 | 1.17E-08 | Pr12c2,18811:up Ccl2,20296:up Pdgif,54635:down Figf,14205:up Sema7a,20361:down Srxp2,68792:down Cxc12,20315:up Postn,50706:down Vegfa,22339:down Mmp2,17390:down Lrrc15,74488:down Gas6,14456:up Cxc14,57266:down Egfr,13649:down Fgfr1,14182:down Has2,15117:down Wnt5a,22418:down Ccl12,20293:up Ptgs2,19225:down Ccl4,20303:up Bmp4,12159:up Igf1,16000:up Cxc19,17329:up Ret,19713:up Tgfb2,21808:down Plpp3,67916:up F3,14066:up Kitl,17311:up                                                                                                                                                                                                                                                                                                                                                                                                         |
| response to growth factor                          | GO:0070848 | 2.90E-10 | 1.42E-08 | Fstl3,83554:down Flrt2,399558:down Hpgd,15446:up Ccl2,20296:up Figf,14205:up Aspn,66695:down Ankrd1,107765:down Htra3,78558:down Vegfa,22339:down Ibsp,15891:up Adamts12,239337:down Ccl109,235505:down Gas6,14456:up Akr1c18,105349:up Col1a2,12843:down Fgfr1,14182:down Egfr,13649:down Has2,15117:down Sfrp1,20377:up Sulf1,240725:down Wnt5a,22418:down Tgfb3,21814:up Bmpr1a,12166:down Grem1,23892:up Bmp4,12159:up Col3a1,12825:down Chst11,58250:down Sfrp2,20319:up Tgfb2,21808:down Npnt,114249:up Fgfr2,14183:up                                                                                                                                                                                                                                                                                                                                |
| positive regulation of locomotion                  | GO:0040017 | 3.12E-10 | 1.52E-08 | Pr12c2,18811:up Ccl2,20296:up Pdgif,54635:down Figf,14205:up Sema7a,20361:down Srxp2,68792:down Cxc12,20315:up Postn,50706:down Vegfa,22339:down Mmp2,17390:down Lrrc15,74488:down Gas6,14456:up Trf,22041:up Cxc14,57266:down Fgfr1,14182:down Egfr,13649:down Has2,15117:down Wnt5a,22418:down Ccl12,20293:up Ptgs2,19225:down Ccl4,20303:up Bmp4,12159:up Igf1,16000:up Cxc19,17329:up Ret,19713:up Tgfb2,21808:down Plpp3,67916:up F3,14066:up Kitl,17311:up                                                                                                                                                                                                                                                                                                                                                                                            |
| tissue morphogenesis                               | GO:0048729 | 3.30E-10 | 1.59E-08 | Adm,11535:up Plxnd1,67784:up Aldh1a2,19378:up Mgp,17313:up Ankrd1,107765:down Wnt5a,22418:down Bmpr1a,12166:down Stc1,20855:up Bmp4,12159:up Igf1,16000:up Tnc,21923:down Ret,19713:up Tgfb2,21808:down Aldh1a3,56847:down Fgfr2,14183:up Cthrc1,68588:down Ptk7,71461:down Inhba,16323:down Vdr,22337:down Cxc12,20315:up Vegfa,22339:down Mmp2,17390:down Adamts12,239337:down Tnf,21926:up Col11a1,12814:down Egfr,13649:down Fgfr1,14182:down Sfrp1,20377:up Sulf1,240725:down Tgfb3,21814:up Grem1,23892:up Col3a1,12825:down Sfrp2,20319:up Col5a1,12831:down Rspo2,239405:up Npnt,114249:up                                                                                                                                                                                                                                                          |
| negative regulation of developmental process       | GO:0051093 | 4.17E-10 | 1.99E-08 | Fstl3,83554:down Col5a2,12832:down Clec2d,93694:up Tmem176b,65963:up Ccl2,20296:up Ednrb,13618:up Postn,50706:down Cx3cr1,13051:down Plk2,20620:down Cxc14,57266:down Cd24a,12484:down Wnt5a,22418:down Bmpr1a,12166:down Adipoq,11450:up Bmp4,12159:up Igf1,16000:up Tgfb2,21808:down Thbs2,21826:down Fam101b,76566:down Pr12c2,18811:up Lrrc17,74511:down Ccl9,20308:up Efemp1,216616:up Inhba,16323:down Dpysl3,22240:down Aspn,66695:down Vegfa,22339:down Adamts12,239337:down Tnf,21926:up Pparg,19016:up Gas6,14456:up Tmem176a,66058:up Fgfr1,14182:down Sfrp1,20377:up Sulf1,240725:down Tgfb3,21814:up Grem1,23892:up Col3a1,12825:down Ceacam1,26365:up Sfrp2,20319:up Col5a1,12831:down Rspo2,239405:up Npnt,114249:up Tnfrsf11b,18383:up Enpp1,18605:down                                                                                     |
| regulation of organ morphogenesis                  | GO:2000027 | 4.46E-10 | 2.12E-08 | Cthrc1,68588:down Ptk7,71461:down Aspn,66695:down Vdr,22337:down Vegfa,22339:down Tnf,21926:up Fgfr1,14182:down Sfrp1,20377:up Sulf1,240725:down Bmpr1a,12166:down Wnt5a,22418:down Grem1,23892:up Bmp4,12159:up Ceacam1,26365:up Sfrp2,20319:up Rspo2,239405:up Tgfb2,21808:down Tnfrsf11b,18383:up Fgfr2,14183:up                                                                                                                                                                                                                                                                                                                                                                                                                                                                                                                                         |
| response to endogenous stimulus                    | GO:0009719 | 4.91E-10 | 2.29E-08 | Fstl3,83554:down Col5a2,12832:down Flrt2,399558:down Hpgd,15446:up Ccl2,20296:up Pdgif,54635:down Ankrd1,107765:down Htra3,78558:down Sord,20322:up Ccl109,235505:down Cdo1,12583:up Akr1c18,105349:up Cd24a,12484:down Ncam1,17967:down Wnt5a,22418:down Bmpr1a,12166:down Il1rn,16181:up Adipoq,11450:up Bmp4,12159:up Igf1,16000:up Chst11,58250:down Gatm,67092:down Tgfb2,21808:down Ptgir,19222:up Fgfr2,14183:up Htr2b,15559:down Inhba,16323:down Aspn,66695:down Vdr,22337:down Htr2a,15558:down Mmp2,17390:down Adamts12,239337:down Igf2,16002:up Pappa,18491:down Pparg,19016:up Tnf,21926:up Col1a2,12843:down Alpl,11647:up Egfr,13649:down Fgfr1,14182:down Sfrp1,20377:up Hmx1,15368:up Has2,15117:down Sulf1,240725:down Tgfb3,21814:up Grem1,23892:up Col3a1,12825:down Sfrp2,20319:up Serpina3g,20715:up Npnt,114249:up Enpp1,18605:down |
| cellular response to interleukin-1                 | GO:0071347 | 5.02E-10 | 2.32E-08 | Ccl9,20308:up Ccl6,20305:up Ccl7,20306:up Ccl2,20296:up Ccl12,20293:up Il1rn,16181:up Ccl4,20303:up Ccl3,20302:up Saa3,20210:up Ankrd1,107765:down Ccl8,20307:up Adamts12,239337:down                                                                                                                                                                                                                                                                                                                                                                                                                                                                                                                                                                                                                                                                       |
| cell chemotaxis                                    | GO:0060326 | 5.05E-10 | 2.32E-08 | Ccl9,20308:up Ccl6,20305:up Ccl7,20306:up Ccl2,20296:up Figf,14205:up Ednrb,13618:up Ccl3,20302:up Saa3,20210:up Cxc12,20315:up Vegfa,22339:down Cx3cr1,13051:down Gas6,14456:up Cxc14,57266:down Fgfr1,14182:down Wnt5a,22418:down Ccl12,20293:up Ccl4,20303:up Grem1,23892:up Ccl8,20307:up Cxc19,17329:up                                                                                                                                                                                                                                                                                                                                                                                                                                                                                                                                                |
| connective tissue development                      | GO:0061448 | 6.21E-10 | 2.82E-08 | Fam101b,76566:down Efemp1,216616:up Mgp,17313:up Mmp13,17386:up Serpinh1,12406:down Adamts12,239337:down Loxl2,94352:down Col11a1,12814:down Fgfr1,14182:down Sulf1,240725:down Bmpr1a,12166:down Wnt5a,22418:down Stc1,20855:up Grem1,23892:up Bmp4,12159:up Igf1,16000:up Chst11,58250:down Sfrp2,20319:up Col5a1,12831:down Rspo2,239405:up Tgfb2,21808:down                                                                                                                                                                                                                                                                                                                                                                                                                                                                                             |

|                                                     |            |          |          |                                                                                                                                                                                                                                                                                                                                                                                                                                                                                                                                                                                                                                                                                                                                                                                                                                                                                                                                                                                                                                                                                                                                                                                                                                                                                                                                                                                                                                                                                                                                                                                                                                                                                                                                                                                                                                                                                                                                                           |
|-----------------------------------------------------|------------|----------|----------|-----------------------------------------------------------------------------------------------------------------------------------------------------------------------------------------------------------------------------------------------------------------------------------------------------------------------------------------------------------------------------------------------------------------------------------------------------------------------------------------------------------------------------------------------------------------------------------------------------------------------------------------------------------------------------------------------------------------------------------------------------------------------------------------------------------------------------------------------------------------------------------------------------------------------------------------------------------------------------------------------------------------------------------------------------------------------------------------------------------------------------------------------------------------------------------------------------------------------------------------------------------------------------------------------------------------------------------------------------------------------------------------------------------------------------------------------------------------------------------------------------------------------------------------------------------------------------------------------------------------------------------------------------------------------------------------------------------------------------------------------------------------------------------------------------------------------------------------------------------------------------------------------------------------------------------------------------------|
| regulation of defense response                      | GO:0031347 | 6.23E-10 | 2.82E-08 | Clec2d,93694:up Ccl7,20306:up Ccl2,20296:up C3,12266:up Ednrb,13618:up Sema7a,20361:down Cx3cr1,13051:down Cd24a,12484:down Wnt5a,22418:down Ccl12,20293:up Ccl4,20303:up Adipoq,11450:up Irf1,11597:up Irf1r1,17082:down Ccl9,20308:up Ccl6,20305:up Aoah,27052:up Ccl3,20302:up Ctla2a,13024:down Fabp4,11770:up Mmp2,17390:down Igf2,16002:up Adams12,239337:down Pparg,19016:up Tnf,21926:up Lmcd1,30937:up Egfr,13649:down C1qtnf3,81799:down Ptgs2,19225:down Ccl8,20307:up Ceacam1,26365:up Serpin1,12258:up                                                                                                                                                                                                                                                                                                                                                                                                                                                                                                                                                                                                                                                                                                                                                                                                                                                                                                                                                                                                                                                                                                                                                                                                                                                                                                                                                                                                                                       |
| muscle cell proliferation                           | GO:0033002 | 8.70E-10 | 3.91E-08 | Vegfa,22339:down Mmp2,17390:down Igf1,16000:up Pparg,19016:up Tnf,21926:up Egfr,13649:down Fgfr1,14182:down Hmox1,15368:up Ncam1,17967:down Tgfb3,21814:up Bmpr1a,12166:down Wisp1,22402:down Ptgs2,19225:down Adipoq,11450:up Bmp4,12159:up Igf1,16000:up Tgfb2,21808:down Ptgir,19222:up Fgfr2,14183:up                                                                                                                                                                                                                                                                                                                                                                                                                                                                                                                                                                                                                                                                                                                                                                                                                                                                                                                                                                                                                                                                                                                                                                                                                                                                                                                                                                                                                                                                                                                                                                                                                                                 |
| protein phosphorylation                             | GO:0006468 | 9.19E-10 | 4.10E-08 | Igf1,16010:up Frt2,399558:down Sfrp4,20379:up Ccl7,20306:up Ccl2,20296:up C3,12266:up Pdgfr,54635:down Ednrb,13618:up Sema7a,20361:down Igf1,16000:up Cd109,235505:down Dok2,13449:up Plk2,20620:down Trf,22041:up Cd24a,12484:down Wnt5a,22418:down Bmpr1a,12166:down Ccl12,20293:up Mark1,226778:up Irf1r1,17082:down Ccl4,20303:up Adipoq,11450:up Bmp4,12159:up Igf1,16000:up Ret,19713:up Tgfb2,21808:down Plpp3,67916:up Fgfr2,14183:up Kitl,17311:up Htr2b,15559:down Ccl9,20308:up Egfr,13649:down Fgfr1,14182:down Ccl6,20305:up Inhba,16323:down Aspn,66695:down Ccl3,20302:up Saa3,20210:up Crif1,12931:down Fabp4,11770:up Vegfa,22339:down Htr2a,15558:down Lrrc15,74488:down Igf2,16002:up Gas6,14456:up Tnf,21926:up Fgfr1,14182:down Egfr,13649:down Sfrp1,20377:up C1qtnf3,81799:down Ccl4,12504:up Tgfb3,21814:up Grem1,23892:up Ceacam1,26365:up Ccl8,20307:up Sfrp2,20319:up Fam20a,208659:down Npnt,114249:up Tnfrsf11b,18383:up Prkar2b,19088:up Errf1,74155:down Enpp1,18605:down                                                                                                                                                                                                                                                                                                                                                                                                                                                                                                                                                                                                                                                                                                                                                                                                                                                                                                                                                  |
| mesenchymal cell development                        | GO:0014031 | 9.93E-10 | 4.40E-08 | Fam101b,76566:down Htr2b,15559:down Aldh1a2,19378:up Ednrb,13618:up Sema7a,20361:down Loxl2,94352:down Loxl3,16950:down Sfrp1,20377:up Has2,15117:down Tgfb3,21814:up Bmpr1a,12166:down Wnt5a,22418:down Grem1,23892:up Sfrp2,20319:up Ret,19713:up Tgfb2,21808:down Fgfr2,14183:up Kitl,17311:up                                                                                                                                                                                                                                                                                                                                                                                                                                                                                                                                                                                                                                                                                                                                                                                                                                                                                                                                                                                                                                                                                                                                                                                                                                                                                                                                                                                                                                                                                                                                                                                                                                                         |
| bone mineralization                                 | GO:0030282 | 1.02E-09 | 4.47E-08 | Fam101b,76566:down Bmpr1a,12166:down Ptgs2,19225:down Mgp,17313:up Aspn,66695:down Grem1,23892:up Mmp13,17386:up Igf1,16000:up Bmp4,12159:up Ank,11732:down Gpm6b,14758:up Rspo2,239405:up Ibsp,15891:up Fgfr2,14183:up                                                                                                                                                                                                                                                                                                                                                                                                                                                                                                                                                                                                                                                                                                                                                                                                                                                                                                                                                                                                                                                                                                                                                                                                                                                                                                                                                                                                                                                                                                                                                                                                                                                                                                                                   |
| negative regulation of biological process           | GO:0048519 | 1.10E-09 | 4.81E-08 | Fstl3,83554:down Clec2d,93694:up Adm,11535:up Frt2,399558:down Tmem176b,65963:up Hpgd,15446:up Sfrp4,20379:up Ankrd1,107765:down Cx3cr1,13051:down Igf1,16000:up Cd109,235505:down Loxl2,94352:down Plk2,20620:down Loxl3,16950:down Cxl14,57266:down Cd24a,12484:down Wnt5a,22418:down Stc1,20855:up Irf1r1,17082:down Maob,109731:up Adipoq,11450:up Bmp4,12159:up Igf1,16000:up Oasl1,231655:up Tgfb2,21808:down Ptgir,19222:up Fgfr2,14183:up Thbs2,21826:down Cthrc1,68588:down Htr2b,15559:down Kng1,16644:up Prl2c2,18811:up Efemp1,216616:up Dpys3,22240:down Sipi,20568:up Aspn,66695:down Vdr,22337:down Fabp4,11770:up Cxl12,20315:up Nabp1,109019:down Htr2a,15558:down Mmp2,17390:down Oas3,246727:up Slc40a1,53945:up Gas6,14456:up Egfr,13649:down Sfrp1,20377:up C1qtnf3,81799:down Tgfb3,21814:up Ceacam1,26365:up Sfrp2,20319:up Serpin3g,20715:up Rspo2,239405:up Tnfrsf11b,18383:up Prkar2b,19088:up Mt1,17748:up S100a1,20193:up Col5a2,12832:down Aldh1a2,19378:up Ccl2,20296:up Cst7,13011:up Ednrb,13618:up Epas1,13819:up Htra3,78558:down Gpm6b,14758:up Postn,50706:down Ptx3,19288:up Akr1c18,105349:up Ncam1,17967:down Ccl12,20293:up Bmpr1a,12166:down Wisp1,22402:down Ccl4,20303:up Chst11,58250:down Tnc,21923:down Prg4,96875:down Pdxk,216134:up Plpp3,67916:up Creb3l1,26427:down Irf1r1,17082:down Kitl,17311:up Fam101b,76566:down Lrrc17,74511:down Hp,15439:up Ccl9,20308:up Inhba,16323:down Aoah,27052:up Plat,18791:down Tfpi2,21789:down Ctla2a,13024:down Crif1,12931:down Vegfa,22339:down Serpine2,20720:up Adams12,239337:down Lrrc15,74488:down Nxn,18230:down Igf2,16002:up Anpep,16790:up Kdelr3,105785:down Pparg,19016:up Tnf,21926:up Tmem176a,66058:up Gp1r,14652:down Lmcd1,30937:up Tnfrsf23,79201:down Fgfr1,14182:down Hmox1,15368:up Sulf1,240725:down Susd2,71733:up Ptgs2,19225:down Grem1,23892:up Col3a1,12825:down Col5a1,12831:down Serpin1,12258:up Errf1,74155:down Enpp1,18605:down |
| lymphocyte migration                                | GO:0072676 | 1.12E-09 | 4.86E-08 | Gas6,14456:up Cxl14,57266:down Ccl9,20308:up Ccl6,20305:up Wnt5a,22418:down Ccl7,20306:up Ccl2,20296:up Ccl12,20293:up Ccl4,20303:up Ccl3,20302:up Ccl8,20307:up Cxl12,20315:up                                                                                                                                                                                                                                                                                                                                                                                                                                                                                                                                                                                                                                                                                                                                                                                                                                                                                                                                                                                                                                                                                                                                                                                                                                                                                                                                                                                                                                                                                                                                                                                                                                                                                                                                                                           |
| epithelium development                              | GO:0060429 | 1.22E-09 | 5.23E-08 | Adm,11535:up Plxnd1,67784:up Sfrp4,20379:up Aldh1a2,19378:up Mgp,17313:up Ednrb,13618:up Cd109,235505:down Wnt5a,22418:down Bmpr1a,12166:down Stc1,20855:up Adipoq,11450:up Bmp4,12159:up Igf1,16000:up Tnc,21923:down Ret,19713:up Tgfb2,21808:down Hpse,15442:up Aldh1a3,56847:down Fgfr2,14183:up Kitl,17311:up Cthrc1,68588:down Ptk7,71461:down Inhba,16323:down Vdr,22337:down Crif1,12931:down Cxl12,20315:up Vegfa,22339:down Mmp2,17390:down Serpine2,20720:up Adams12,239337:down Slc40a1,53945:up Pparg,19016:up Tnf,21926:up Egfr,13649:down Fgfr1,14182:down Sfrp1,20377:up Sulf1,240725:down Tgfb3,21814:up Ptgs2,19225:down Grem1,23892:up Ceacam1,26365:up Sfrp2,20319:up Mcoln3,171166:up Col5a1,12831:down Rspo2,239405:up Npnt,114249:up Errf1,74155:down                                                                                                                                                                                                                                                                                                                                                                                                                                                                                                                                                                                                                                                                                                                                                                                                                                                                                                                                                                                                                                                                                                                                                                              |
| chemokine-mediated signaling pathway                | GO:0070098 | 1.26E-09 | 5.36E-08 | Ccl9,20308:up Ccl6,20305:up Ccl7,20306:up Ccl2,20296:up Ccl12,20293:up Ccl4,20303:up Ccl3,20302:up Ccl8,20307:up Cxl9,17329:up Cxl12,20315:up                                                                                                                                                                                                                                                                                                                                                                                                                                                                                                                                                                                                                                                                                                                                                                                                                                                                                                                                                                                                                                                                                                                                                                                                                                                                                                                                                                                                                                                                                                                                                                                                                                                                                                                                                                                                             |
| monocyte chemotaxis                                 | GO:0002548 | 1.26E-09 | 5.36E-08 | Ccl9,20308:up Ccl6,20305:up Ccl7,20306:up Ccl2,20296:up Ccl12,20293:up Grem1,23892:up Ccl4,20303:up Ccl3,20302:up Ccl8,20307:up Cxl12,20315:up                                                                                                                                                                                                                                                                                                                                                                                                                                                                                                                                                                                                                                                                                                                                                                                                                                                                                                                                                                                                                                                                                                                                                                                                                                                                                                                                                                                                                                                                                                                                                                                                                                                                                                                                                                                                            |
| regulation of phosphate metabolic process           | GO:0019220 | 1.30E-09 | 5.49E-08 | Igf1,16010:up Adm,11535:up Frt2,399558:down Sfrp4,20379:up Ccl7,20306:up Ccl2,20296:up C3,12266:up Pdgfr,54635:down Ednrb,13618:up Sema7a,20361:down Igf1,16000:up Cd109,235505:down Trf,22041:up Cd24a,12484:down Wnt5a,22418:down Bmpr1a,12166:down Ccl12,20293:up Irf1r1,17082:down Ccl4,20303:up Adipoq,11450:up Bmp4,12159:up Igf1,16000:up Ret,19713:up Tgfb2,21808:down Plpp3,67916:up Ptgir,19222:up Fgfr2,14183:up Kitl,17311:up Htr2b,15559:down Ccl9,20308:up Ccl6,20305:up Inhba,16323:down Aspn,66695:down Ccl3,20302:up Srxp2,68792:down Crif1,12931:down Fabp4,11770:up Vegfa,22339:down Htr2a,15558:down Lrrc15,74488:down Igf2,16002:up Gas6,14456:up Tnf,21926:up Fgfr1,14182:down Egfr,13649:down Sfrp1,20377:up C1qtnf3,81799:down Cd4,12504:up Grem1,23892:up Ceacam1,26365:up Ccl8,20307:up Sfrp2,20319:up Fam20a,208659:down Npnt,114249:up Tnfrsf11b,18383:up Prkar2b,19088:up Errf1,74155:down Enpp1,18605:down                                                                                                                                                                                                                                                                                                                                                                                                                                                                                                                                                                                                                                                                                                                                                                                                                                                                                                                                                                                                                  |
| positive regulation of protein modification process | GO:0031401 | 1.43E-09 | 6.00E-08 | Igf1,16010:up Ccl7,20306:up Ccl2,20296:up C3,12266:up Pdgfr,54635:down Ednrb,13618:up Sema7a,20361:down Igf1,16000:up Trf,22041:up Cd24a,12484:down Wnt5a,22418:down Bmpr1a,12166:down Ccl12,20293:up Irf1r1,17082:down Ccl4,20303:up Adipoq,11450:up Bmp4,12159:up Igf1,16000:up Ret,19713:up Tgfb2,21808:down Plpp3,67916:up Fgfr2,14183:up Kitl,17311:up Htr2b,15559:down Ccl9,20308:up Ccl6,20305:up Inhba,16323:down Ccl3,20302:up Crif1,12931:down Vegfa,22339:down Htr2a,15558:down Igf2,16002:up Gas6,14456:up Tnf,21926:up Fgfr1,14182:down Egfr,13649:down C1qtnf3,81799:down Cd4,12504:up Grem1,23892:up Ccl8,20307:up Ceacam1,26365:up Sfrp2,20319:up Fam20a,208659:down Tnfrsf11b,18383:up Npnt,114249:up                                                                                                                                                                                                                                                                                                                                                                                                                                                                                                                                                                                                                                                                                                                                                                                                                                                                                                                                                                                                                                                                                                                                                                                                                                    |

|                                                          |            |          |          |                                                                                                                                                                                                                                                                                                                                                                                                                                                                                                                                                                                                                                                                                                                                                                                                                                                                                                                                                                                                                                                                                                                                                                                                                                                                                                                                                                                                                                                                                                                                                                                                                                                                                                                                                                                                                                                                                                                                                                                                                                                                                                                                       |
|----------------------------------------------------------|------------|----------|----------|---------------------------------------------------------------------------------------------------------------------------------------------------------------------------------------------------------------------------------------------------------------------------------------------------------------------------------------------------------------------------------------------------------------------------------------------------------------------------------------------------------------------------------------------------------------------------------------------------------------------------------------------------------------------------------------------------------------------------------------------------------------------------------------------------------------------------------------------------------------------------------------------------------------------------------------------------------------------------------------------------------------------------------------------------------------------------------------------------------------------------------------------------------------------------------------------------------------------------------------------------------------------------------------------------------------------------------------------------------------------------------------------------------------------------------------------------------------------------------------------------------------------------------------------------------------------------------------------------------------------------------------------------------------------------------------------------------------------------------------------------------------------------------------------------------------------------------------------------------------------------------------------------------------------------------------------------------------------------------------------------------------------------------------------------------------------------------------------------------------------------------------|
| regulation of phosphorus metabolic process               | GO:0051174 | 1.49E-09 | 6.19E-08 | Igfbp4,16010:up Adm,11535:up Flrt2,399558:down Sfrp4,20379:up Ccl7,20306:up Ccl2,20296:up C3,12266:up Pdgfc,54635:down Ednrb,13618:up Sema7a,20361:down Igfbp3,16009:up Cd109,235505:down Trf,2041:up Cd24a,12484:down Wnt5a,22418:down Bmpr1a,12166:down Ccl12,20293:up Il1rn,16181:up Ccl4,20303:up Adipoq,11450:up Bmp4,12159:up Igf1,16000:up Ret,19713:up Tgfb2,21808:down Plpp3,67916:up Ptgir,19222:up Fgfr2,14183:up Kitl,17311:up Htr2b,15559:down Ccl9,20308:up Ccl6,20305:up Inhba,16323:down Aspn,66695:down Ccl3,20302:up Srxp2,68792:down Crlf1,12931:down Fabp4,11770:up Vegfa,22339:down Htr2a,15558:down Lrrc15,74488:down Igf2,16002:up Gas6,14456:up Tnf,21926:up Fgfr1,14182:down Egfr,13649:down Sfrp1,20377:up C1qtnf3,81799:down Cd4,12504:up Grem1,23892:up Ceacam1,26365:up Ccl8,20307:up Sfrp2,20319:up Fam20a,208659:down Npnt,114249:up Tnfrsf11b,18383:up Prkar2b,19088:up Errfi1,74155:down Enpp1,18605:down                                                                                                                                                                                                                                                                                                                                                                                                                                                                                                                                                                                                                                                                                                                                                                                                                                                                                                                                                                                                                                                                                                                                                                                            |
| leukocyte chemotaxis                                     | GO:0030595 | 1.61E-09 | 6.64E-08 | Ccl9,20308:up Ccl6,20305:up Ccl7,20306:up Ccl2,20296:up Figf,14205:up Ednrb,13618:up Ccl3,20302:up Cxl12,20315:up Cx3cr1,13051:down Gas6,14456:up Cxl14,57266:down Ccl12,20293:up Wnt5a,22418:down Ccl4,20303:up Grem1,23892:up Ccl8,20307:up Cxl9,17329:up                                                                                                                                                                                                                                                                                                                                                                                                                                                                                                                                                                                                                                                                                                                                                                                                                                                                                                                                                                                                                                                                                                                                                                                                                                                                                                                                                                                                                                                                                                                                                                                                                                                                                                                                                                                                                                                                           |
| regulation of epithelial cell proliferation              | GO:0050678 | 1.72E-09 | 7.07E-08 | Htr2b,15559:down Ccl2,20296:up Aldh1a2,19378:up Ednrb,13618:up Vdr,22337:down Cxl12,20315:up Vegfa,22339:down Cd109,235505:down Egfr,13649:down Sfrp1,20377:up Has2,15117:down Sulf1,240725:down Wnt5a,22418:down Tgfb3,21814:up Bmpr1a,12166:down Bmp4,12159:up Igf1,16000:up Ceacam1,26365:up Sfrp2,20319:up Tgfb2,21808:down Errfi1,74155:down Fgfr2,14183:up F3,14066:up                                                                                                                                                                                                                                                                                                                                                                                                                                                                                                                                                                                                                                                                                                                                                                                                                                                                                                                                                                                                                                                                                                                                                                                                                                                                                                                                                                                                                                                                                                                                                                                                                                                                                                                                                          |
| regulation of immune system process                      | GO:0002682 | 1.79E-09 | 7.29E-08 | Fstl3,83554:down Clec2d,93694:up Tmem176b,65963:up Ccl2,20296:up C3,12266:up Figf,14205:up Sema7a,20361:down Cxl14,57266:down Cd24a,12484:down Wnt5a,22418:down Ccl12,20293:up Ccl4,20303:up Adipoq,11450:up Bmp4,12159:up Igf1,16000:up Cxl9,17329:up Tgfb2,21808:down C1s2,317677:up Ilf1,15957:up Il1rl1,17082:down Clec4e,56619:up Kitl,17311:up Lrrc17,74511:down Inhba,16323:down Ccl3,20302:up Ctla2a,13024:down C1s1,50908:up Cxl12,20315:up Vegfa,22339:down Phf1a,219131:up Mmp2,17390:down Igf2,16002:up Pparg,19016:up Gas6,14456:up Tnf,21926:up Tmem176a,66058:up Lmcd1,30937:up Hmox1,15368:up Sfrp1,20377:up Cd4,12504:up C1rb,667277:up Tfrc,22042:up Grem1,23892:up Col3a1,12825:down Ceacam1,26365:up Serping1,12258:up Tnfrsf9,21950:up                                                                                                                                                                                                                                                                                                                                                                                                                                                                                                                                                                                                                                                                                                                                                                                                                                                                                                                                                                                                                                                                                                                                                                                                                                                                                                                                                                           |
| anatomical structure formation involved in morphogenesis | GO:0048646 | 1.99E-09 | 8.04E-08 | Col5a2,12832:down Adm,11535:up Plxnd1,67784:up Ccl2,20296:up C3,12266:up Figf,14205:up Epas1,13819:up Tnfrsf12a,27279:down Ddah1,69219:down Cx3cr1,13051:down Cd109,235505:down Loxl2,94352:down Wnt5a,22418:down Bmpr1a,12166:down Ccl12,20293:up Col8a1,12837:down Bmp4,12159:up Cxl9,17329:up Ret,19713:up Tgfb2,21808:down Vegfb,22340:up Hpse,15442:up Aldh1a3,56847:down Fgfr2,14183:up F3,14066:up Thbs2,21826:down Cthrc1,68588:down Prl2c2,18811:up Ptk7,71461:down Inhba,16323:down Srxp2,68792:down Ccl12,20315:up Vegfa,22339:down Mmp2,17390:down Anpep,16790:up Slc40a1,53945:up Tnf,21926:up Fgfr1,14182:down Hmox1,15368:up Sfrp1,20377:up Sulf1,240725:down Tgfb3,21814:up Ptgs2,19225:down Grem1,23892:up Ccl8,20307:up Ceacam1,26365:up Sfrp2,20319:up Col5a1,12831:down Fam20a,208659:down                                                                                                                                                                                                                                                                                                                                                                                                                                                                                                                                                                                                                                                                                                                                                                                                                                                                                                                                                                                                                                                                                                                                                                                                                                                                                                                        |
| tissue remodeling                                        | GO:0048771 | 2.43E-09 | 9.75E-08 | Cthrc1,68588:down Epas1,13819:up Vdr,22337:down Vegfa,22339:down Mmp2,17390:down Trf,22041:up Cd24a,12484:down Egfr,13649:down Sfrp1,20377:up Tgfb3,21814:up Tfrc,22042:up Grem1,23892:up Igf1,16000:up Ceacam1,26365:up Tgfb2,21808:down Tnfrsf11b,18383:up Enpp1,18605:down                                                                                                                                                                                                                                                                                                                                                                                                                                                                                                                                                                                                                                                                                                                                                                                                                                                                                                                                                                                                                                                                                                                                                                                                                                                                                                                                                                                                                                                                                                                                                                                                                                                                                                                                                                                                                                                         |
| regulation of vasculature development                    | GO:1901342 | 2.98E-09 | 1.19E-07 | Prl2c2,18811:up Adm,11535:up Plxnd1,67784:up Ccl2,20296:up C3,12266:up Tnfrsf12a,27279:down Srxp2,68792:down Ddah1,69219:down Vegfa,22339:down Cx3cr1,13051:down Hmox1,15368:up Sulf1,240725:down Wnt5a,22418:down Ptgs2,19225:down Grem1,23892:up Bmp4,12159:up Ceacam1,26365:up Sfrp2,20319:up F3,14066:up Thbs2,21826:down                                                                                                                                                                                                                                                                                                                                                                                                                                                                                                                                                                                                                                                                                                                                                                                                                                                                                                                                                                                                                                                                                                                                                                                                                                                                                                                                                                                                                                                                                                                                                                                                                                                                                                                                                                                                         |
| regulation of angiogenesis                               | GO:0045765 | 3.29E-09 | 1.31E-07 | Prl2c2,18811:up Adm,11535:up Plxnd1,67784:up Ccl2,20296:up C3,12266:up Tnfrsf12a,27279:down Srxp2,68792:down Ddah1,69219:down Vegfa,22339:down Cx3cr1,13051:down Hmox1,15368:up Sulf1,240725:down Wnt5a,22418:down Ptgs2,19225:down Grem1,23892:up Ceacam1,26365:up Sfrp2,20319:up F3,14066:up Thbs2,21826:down                                                                                                                                                                                                                                                                                                                                                                                                                                                                                                                                                                                                                                                                                                                                                                                                                                                                                                                                                                                                                                                                                                                                                                                                                                                                                                                                                                                                                                                                                                                                                                                                                                                                                                                                                                                                                       |
| cytokine production                                      | GO:0001816 | 3.57E-09 | 1.40E-07 | Ly9,17085:up Ccl2,20296:up C3,12266:up Figf,14205:up Sema7a,20361:down Clec4n,56620:up Postn,50706:down Cd24a,12484:down Wnt5a,22418:down Ccl4,20303:up Adipoq,11450:up Prg4,96875:down Tgfb2,21808:down Hpse,15442:up Il1rl1,17082:down Clec4e,56619:up Htr2b,15559:down Ccl3,20302:up Fabp4,11770:up Tnf,21926:up Pparg,19016:up Gas6,14456:up Fgfr1,14182:down Lpl,16956:up Hmox1,15368:up Cd4,12504:up C1qtnf3,81799:down Sulf1,240725:down Ptgs2,19225:down Ceacam1,26365:up Errfi1,74155:down Tnfrsf9,21950:up                                                                                                                                                                                                                                                                                                                                                                                                                                                                                                                                                                                                                                                                                                                                                                                                                                                                                                                                                                                                                                                                                                                                                                                                                                                                                                                                                                                                                                                                                                                                                                                                                  |
| positive regulation of biological process                | GO:0048518 | 3.57E-09 | 1.40E-07 | Fstl3,83554:down Igfbp4,16010:up Adm,11535:up Flrt2,399558:down Sfrp4,20379:up Lyl1,17095:up Igfbp3,16009:up Plk2,20620:down Cd24a,12484:down Il1rn,16181:up Maob,109731:up Bmp4,12159:up Hpse,15442:up Medag,70717:down Ptgir,19222:up Fgfr2,14183:up Thbs2,21826:down Htr2b,15559:down Ccl6,20305:up Fam132b,227358:down Mmp2,17390:down Slc40a1,53945:up Egfr,13649:down C1rb,667277:up Tfrc,22042:up Ccl8,20307:up Rspo2,239405:up Fam20a,208659:down Aldh1a2,19378:up Ccl2,20296:up Ednrb,13618:up Mmp13,17386:up Tnfrsf12a,27279:down Clec4n,56620:up Ptx3,19288:up Ncam1,17967:down Ccl4,20303:up Vegfb,22340:up Aldh1a3,56847:down Plpp3,67916:up Lama2,16773:down Ccl9,20308:up Ptk7,71461:down Inhba,16323:down Crlf1,12931:down C1s1,50908:up Plod2,26432:down Vegfa,22339:down Serpine2,20720:up Igf2,16002:up Tnf,21926:up Fxyd1,56188:up Fgfr1,14182:down Lpl,16956:up Sulf1,240725:down Cd4,12504:up Col3a1,12825:down Serping1,12258:up C3,12266:up Ankrd1,107765:down Cx3cr1,13051:down Trf,22041:up Loxl2,94352:down Cxl14,57266:down Wnt5a,22418:down Stc1,20855:up Col8a1,12837:down Adipoq,11450:up Igf1,16000:up Crabp2,12904:down Cxl9,17329:up Tgfb2,21808:down F3,14066:up Clec4e,56619:up Prl2c2,18811:up Cthrc1,68588:down Efemp1,216616:up Dpysl3,22240:down Ninj1,18081:up Vdr,22337:down Fabp4,11770:up Cxl12,20315:up Htr2a,15558:down Smoc2,64074:down Gas6,14456:up Sfrp1,20377:up Tgfb3,21814:up C1qtnf3,81799:down Serinc2,230779:down Ceacam1,26365:up Sfrp2,20319:up Tnfrsf11b,18383:up Npnt,114249:up S100a1,20193:up Ic1,218333:down Ly9,17085:up Ccl7,20306:up Figf,14205:up Pdgfc,54635:down Epas1,13819:up Sema7a,20361:down Gpm6b,14758:up Ddah1,69219:down Sdpr,20324:down Postn,50706:down Akr1c18,105349:up Ccl12,20293:up Bmpr1a,12166:down Wisp1,22402:down Tnc,21923:down Ret,19713:up C1s2,317677:up Creb3l1,26427:down Kitl,17311:up Il1rl1,17082:down Hp,15439:up Ras11a,68895:up Ccl3,20302:up Plat,18791:down Srxp2,68792:down Lrrc15,74488:down Pparg,19016:up Lmcd1,30937:up Glp1r,14652:down Hmox1,15368:up Has2,15117:down Ptgs2,19225:down Grem1,23892:up Tnfrsf9,21950:up |

|                                                |            |          |          |                                                                                                                                                                                                                                                                                                                                                                                                                                                                                                                                                                                                                                                                                                                                                                                                                                                                                                                                                                                                                                                                                                                                                                                                                                                                                                                                                                                                                                                                                                                                                                                                                                                                                                                                                                                                                                                                                                                                                                                  |
|------------------------------------------------|------------|----------|----------|----------------------------------------------------------------------------------------------------------------------------------------------------------------------------------------------------------------------------------------------------------------------------------------------------------------------------------------------------------------------------------------------------------------------------------------------------------------------------------------------------------------------------------------------------------------------------------------------------------------------------------------------------------------------------------------------------------------------------------------------------------------------------------------------------------------------------------------------------------------------------------------------------------------------------------------------------------------------------------------------------------------------------------------------------------------------------------------------------------------------------------------------------------------------------------------------------------------------------------------------------------------------------------------------------------------------------------------------------------------------------------------------------------------------------------------------------------------------------------------------------------------------------------------------------------------------------------------------------------------------------------------------------------------------------------------------------------------------------------------------------------------------------------------------------------------------------------------------------------------------------------------------------------------------------------------------------------------------------------|
| positive regulation of cellular process        | GO:0048522 | 4.26E-09 | 1.66E-07 | Fstl3,83554:down lgfbp4,16010:up Adm,11535:up Flrt2,399558:down Sfrp4,20379:up C3,12266:up Ankrd1,107765:down Lyl1,17095:up Cx3cr1,13051:down lgfbp3,16009:up Loxl2,94352:down Plk2,20620:down Trf,22041:up Cxc12,1457266:down Cd24a,12484:down Wnt5a,22418:down Stc1,20855:up Il1rn,16181:up Col8a1,12837:down Maob,109731:up Adipoq,11450:up Bmp4,12159:up lgf1,16000:up Crabp2,12904:down Cxd9,17329:up Tgfb2,21808:down Hpse,15442:up Medag,70717:down Ptgir,19222:up F3,14066:up Fgfr2,14183:up Thbs2,21826:down Clec4e,56619:up Cthrc1,68588:down Htr2b,15559:down Pr1c2,18811:up Efemp1,216616:up Ccl6,20305:up Dpysl3,22240:down Ninj1,18081:up Vdr,22337:down Fabp4,11770:up Cxc12,20315:up Htr2a,15558:down Mmp2,17390:down Smoc2,64074:down Slc40a1,53945:up Gas6,14456:up Egfr,13649:down Sfrp1,20377:up C1qtnf3,81799:down Tgfb3,21814:up Tfrc,22042:up Ceacam1,26365:up Ccl8,20307:up Sfrp2,20319:up Rspo2,239405:up Fam20a,208659:down Npnt,114249:up Tnfrsf11b,18383:up S100a1,20193:up Ic1,218333:down Aldh1a2,19378:up Ccl2,20296:up Ccl7,20306:up Pdgc,54635:down Ednrb,13618:up Figf,14205:up Mmp13,17386:up Sema7a,20361:down Epas1,13819:up Tnfrsf12a,27279:down Ddah1,69219:down Clec4n,56620:up Sdpr,20324:down Postn,50706:down Ptx3,19288:up Akr1c18,105349:up Ncam1,17967:down Bmpr1a,12166:down Ccl12,20293:up Wisp1,22402:down Ccl4,20303:up Tnc,21923:down Ret,19713:up Vegfb,22340:up Aldh1a3,56847:down Ppp3,67916:up Creb3l1,26427:down Il1r1,17082:down Kitl,17311:up Lama2,16773:down Hp,15439:up Ccl9,20308:up Ptk7,71461:down Inhba,16323:down Rasl1a,68895:up Ccl3,20302:up Srxp2,68792:down Crlf1,12931:down Plod2,26432:down Vegfa,22339:down Serpine2,20720:up Lrrc15,74488:down lgf2,16002:up Pparg,19016:up Tnf,21926:up Glp1r,14652:down Lmcd1,30937:up Fxyd1,56188:up Fgfr1,14182:down Has2,15117:down Lpl,16956:up Hmox1,15368:up Sulf1,240725:down Cd4,12504:up Ptgs2,19225:down Grem1,23892:up Col3a1,12825:down Tnfsf9,21950:up |
| innate immune response                         | GO:0045087 | 4.30E-09 | 1.66E-07 | Clec2d,93694:up Ccl9,20308:up Ly9,17085:up Ccl6,20305:up Mrc1,17533:up Ccl7,20306:up Ccl2,20296:up C3,12266:up Slpi,20568:up Ccl3,20302:up Ifit3,15959:up Clec4n,56620:up C1s1,50908:up Mmp2,17390:down Oas3,246727:up lgf2,16002:up Tnf,21926:up Pparg,19016:up Ptx3,19288:up Wnt5a,22418:down Ccl12,20293:up C1rb,667277:up Ccl4,20303:up Ceacam1,26365:up Ccl8,20307:up Serping1,12258:up Oas1,231655:up C1s2,317677:up Ifit1,15957:up Clec4e,56619:up                                                                                                                                                                                                                                                                                                                                                                                                                                                                                                                                                                                                                                                                                                                                                                                                                                                                                                                                                                                                                                                                                                                                                                                                                                                                                                                                                                                                                                                                                                                        |
| chondrocyte differentiation                    | GO:002062  | 4.43E-09 | 1.70E-07 | Fam101b,76566:down Loxl2,94352:down Fgfr1,14182:down Col11a1,12814:down Efemp1,216616:up Sulf1,240725:down Bmpr1a,12166:down Grem1,23892:up Bmp4,12159:up Chst11,58250:down Serpinh1,12406:down Sfrp2,20319:up Adams12,239337:down                                                                                                                                                                                                                                                                                                                                                                                                                                                                                                                                                                                                                                                                                                                                                                                                                                                                                                                                                                                                                                                                                                                                                                                                                                                                                                                                                                                                                                                                                                                                                                                                                                                                                                                                               |
| cellular response to interferon-gamma          | GO:0071346 | 4.56E-09 | 1.74E-07 | Pparg,19016:up Ccl9,20308:up Ccl6,20305:up Mrc1,17533:up Ccl7,20306:up Ccl2,20296:up Ccl12,20293:up Ccl4,20303:up Ccl3,20302:up Ccl8,20307:up                                                                                                                                                                                                                                                                                                                                                                                                                                                                                                                                                                                                                                                                                                                                                                                                                                                                                                                                                                                                                                                                                                                                                                                                                                                                                                                                                                                                                                                                                                                                                                                                                                                                                                                                                                                                                                    |
| regulation of ossification                     | GO:0030278 | 4.89E-09 | 1.86E-07 | Fam101b,76566:down Cthrc1,68588:down Mgp,17313:up Gpm6b,14758:up Vegfa,22339:down Tnf,21926:up Fgfr1,14182:down Sfrp1,20377:up Bmpr1a,12166:down Wnt5a,22418:down Grem1,23892:up Bmp4,12159:up lgf1,16000:up Sfrp2,20319:up Ank,11732:down Npnt,114249:up Enpp1,18605:down Creb3l1,26427:down                                                                                                                                                                                                                                                                                                                                                                                                                                                                                                                                                                                                                                                                                                                                                                                                                                                                                                                                                                                                                                                                                                                                                                                                                                                                                                                                                                                                                                                                                                                                                                                                                                                                                    |
| regulation of cytokine production              | GO:001817  | 4.96E-09 | 1.87E-07 | Htr2b,15559:down Ly9,17085:up Ccl2,20296:up C3,12266:up Figf,14205:up Ccl3,20302:up Sema7a,20361:down Clec4n,56620:up Postn,50706:down Gas6,14456:up Pparg,19016:up Tnf,21926:up Fgfr1,14182:down Cd24a,12484:down Hmox1,15368:up Lpl,16956:up Sulf1,240725:down C1qtnf3,81799:down Wnt5a,22418:down Ptgs2,19225:down Ccl4,20303:up Adipoq,11450:up Ceacam1,26365:up Prg4,96875:down Tgfb2,21808:down Hpse,15442:up Errf1,74155:down Il1r1,17082:down Tnfsf9,21950:up Clec4e,56619:up                                                                                                                                                                                                                                                                                                                                                                                                                                                                                                                                                                                                                                                                                                                                                                                                                                                                                                                                                                                                                                                                                                                                                                                                                                                                                                                                                                                                                                                                                            |
| morphogenesis of a branching epithelium        | GO:0061138 | 4.99E-09 | 1.87E-07 | Adm,11535:up Plxnd1,67784:up Mgp,17313:up Vdr,22337:down Cxc12,20315:up Vegfa,22339:down Tnf,21926:up Fgfr1,14182:down Sfrp1,20377:up Sulf1,240725:down Wnt5a,22418:down Grem1,23892:up Bmpr1a,12159:up lgf1,16000:up Sfrp2,20319:up Tnc,21923:down Rspo2,239405:up Npnt,114249:up Fgfr2,14183:up                                                                                                                                                                                                                                                                                                                                                                                                                                                                                                                                                                                                                                                                                                                                                                                                                                                                                                                                                                                                                                                                                                                                                                                                                                                                                                                                                                                                                                                                                                                                                                                                                                                                                |
| response to interleukin-1                      | GO:0070555 | 5.59E-09 | 2.08E-07 | Ccl9,20308:up Ccl6,20305:up Ccl7,20306:up Ccl2,20296:up Ccl12,20293:up Il1rn,16181:up Ccl4,20303:up Ccl3,20302:up Saa3,20210:up Ankrd1,107765:down Ccl8,20307:up Adams12,239337:down                                                                                                                                                                                                                                                                                                                                                                                                                                                                                                                                                                                                                                                                                                                                                                                                                                                                                                                                                                                                                                                                                                                                                                                                                                                                                                                                                                                                                                                                                                                                                                                                                                                                                                                                                                                             |
| regulation of biological quality               | GO:0065008 | 5.72E-09 | 2.12E-07 | Adm,11535:up Flrt2,399558:down Plxnd1,67784:up Sfrp4,20379:up C3,12266:up Cx3cr1,13051:down Plk2,20620:down Trf,22041:up Cd24a,12484:down Wnt5a,22418:down Stc1,20855:up Il1rn,16181:up Maob,109731:up lgf1,16000:up Adipoq,11450:up Bmp4,12159:up Crabp2,12904:down Tgfb2,21808:down Hpse,15442:up Ptgir,19222:up F3,14066:up Thbs2,21826:down Htr2b,15559:down Kng1,16644:up Anxa8,11752:down Mt2,17750:up Vdr,22337:down Pd1a5,72599:down Fabp4,11770:up Fam132b,227358:down Cxc12,20315:up Htr2a,15558:down Mmp2,17390:down Slc40a1,53945:up Gas6,14456:up Egfr,13649:down Sfrp1,20377:up C1qtnf3,81799:down Tgfb3,21814:up Tfrc,22042:up Sncg,20618:up Ceacam1,26365:up Fam20a,208659:down Tnfrsf11b,18383:up Sytl3,80976:up Mt1,17748:up Aldh1a2,19378:up Ccl2,20296:up Pdgc,54635:down Ednrb,13618:up Ampd3,11717:up Mmp13,17386:up Sema7a,20361:down Epas1,13819:up Slc29a1,63959:up Tnfrsf12a,27279:down Gpm6b,14758:up Ddah1,69219:down Steap1,70358:down Postn,50706:down Cdo1,12583:up Ptx3,19288:up Akr1c18,105349:up Ncam1,17967:down Ccl12,20293:up Ccl4,20303:up Ret,19713:up Inhba,16323:down Ppp3,67916:up Kitl,17311:up Inhba,16323:down Ccl3,20302:up Tfpi2,21789:down Srxp2,68792:down Vegfa,22339:down Serpine2,20720:up Nxn,18230:down lgf2,16002:up Anep,16790:up Kdelr3,105785:down Pparg,19016:up Tnf,21926:up Fxyd1,56188:up Col1a2,12843:down Glp1r,14652:down Fgfr1,14182:down Lpl,16956:up Hmox1,15368:up Cd4,12504:up Ptgs2,19225:down Serping1,12258:up Enpp1,18605:down                                                                                                                                                                                                                                                                                                                                                                                                                                                                         |
| regulation of cell adhesion                    | GO:0030155 | 6.63E-09 | 2.42E-07 | Fstl3,83554:down Ccl2,20296:up Gpm6b,14758:up Postn,50706:down Cd24a,12484:down Wnt5a,22418:down Il1rn,16181:up Col8a1,12837:up Adipoq,11450:up Bmp4,12159:up lgf1,16000:up Tnc,21923:down Ret,19713:up Tgfb2,21808:down Ppp3,67916:up Lama2,16773:down Ninj1,18081:up Ctla2a,13024:down Cxc12,20315:up Vegfa,22339:down Serpine2,20720:up Mmp2,17390:down lgf2,16002:up Smoc2,64074:down Tnf,21926:up Has2,15117:down Cd4,12504:up Tfrc,22042:up Grem1,23892:up Ceacam1,26365:up Npnt,114249:up Tnfsf9,21950:up                                                                                                                                                                                                                                                                                                                                                                                                                                                                                                                                                                                                                                                                                                                                                                                                                                                                                                                                                                                                                                                                                                                                                                                                                                                                                                                                                                                                                                                                 |
| regulation of smooth muscle cell proliferation | GO:0048660 | 6.68E-09 | 2.43E-07 | Tnf,21926:up Pparg,19016:up Egfr,13649:down Hmox1,15368:up Bmpr1a,12166:down Wisp1,22402:down Ptgs2,19225:down lgf1,16000:up Bmp4,12159:up Adipoq,11450:up Vegfa,22339:down Mmp2,17390:down lgfbp3,16009:up Ptgir,19222:up Fgfr2,14183:up                                                                                                                                                                                                                                                                                                                                                                                                                                                                                                                                                                                                                                                                                                                                                                                                                                                                                                                                                                                                                                                                                                                                                                                                                                                                                                                                                                                                                                                                                                                                                                                                                                                                                                                                        |
| positive regulation of transport               | GO:0051050 | 7.05E-09 | 2.55E-07 | Ic1,218333:down Sfrp4,20379:up Ccl2,20296:up C3,12266:up Ednrb,13618:up Mmp13,17386:up Ankrd1,107765:down Clec4n,56620:up Postn,50706:down Trf,22041:up Ptx3,19288:up Wnt5a,22418:down Bmpr1a,12166:down Ccl12,20293:up Stc1,20855:up Ccl4,20303:up Adipoq,11450:up Bmp4,12159:up lgf1,16000:up Tgfb2,21808:down Il1r1,17082:down Clec4e,56619:up Htr2b,15559:down Ccl3,20302:up Fam132b,227358:down Cxc12,20315:up Vegfa,22339:down Pparg,19016:up Gas6,14456:up Tnf,21926:up Fxyd1,56188:up Glp1r,14652:down Egfr,13649:down Fgfr1,14182:down Lpl,16956:up C1qtnf3,81799:down Cd4,12504:up Ptgs2,19225:down Grem1,23892:up Ceacam1,26365:up Sfrp2,20319:up S100a1,20193:up                                                                                                                                                                                                                                                                                                                                                                                                                                                                                                                                                                                                                                                                                                                                                                                                                                                                                                                                                                                                                                                                                                                                                                                                                                                                                                     |

|                                                  |            |          |          |                                                                                                                                                                                                                                                                                                                                                                                                                                                                                                                                                                                                                                                                                                                                                                                                                                                                                                                                                                                                                                                                                                                                                                                                                                                                                                                                                                                                                                                                                                                                                                                                                                                                                                                                                                                                                           |
|--------------------------------------------------|------------|----------|----------|---------------------------------------------------------------------------------------------------------------------------------------------------------------------------------------------------------------------------------------------------------------------------------------------------------------------------------------------------------------------------------------------------------------------------------------------------------------------------------------------------------------------------------------------------------------------------------------------------------------------------------------------------------------------------------------------------------------------------------------------------------------------------------------------------------------------------------------------------------------------------------------------------------------------------------------------------------------------------------------------------------------------------------------------------------------------------------------------------------------------------------------------------------------------------------------------------------------------------------------------------------------------------------------------------------------------------------------------------------------------------------------------------------------------------------------------------------------------------------------------------------------------------------------------------------------------------------------------------------------------------------------------------------------------------------------------------------------------------------------------------------------------------------------------------------------------------|
| wound healing                                    | GO:0042060 | 7.29E-09 | 2.62E-07 | Kng1,16644:up Ptk7,71461:down C3,12266:up Pdgfc,54635:down Anxa8,11752:down Ninj1,18081:up Tfpi2,21789:down Tnfrsf12a,27279:down Serpine2,20720:up Cd109,235505:down Gas6,14456:up Egfr,13649:down Hmox1,15368:up Wnt5a,22418:down lgf1,16000:up Col3a1,12825:down Ceacam1,26365:up Serp1g1,12258:up Col5a1,12831:down Tgfb2,21808:down Hpse,15442:up Ppp3,67916:up F3,14066:up                                                                                                                                                                                                                                                                                                                                                                                                                                                                                                                                                                                                                                                                                                                                                                                                                                                                                                                                                                                                                                                                                                                                                                                                                                                                                                                                                                                                                                           |
| blood circulation                                | GO:0008015 | 7.95E-09 | 2.81E-07 | Htr2b,15559:down Kng1,16644:up Adm,11535:up Ednrb,13618:up Epas1,13819:up Ddah1,69219:down Pdstn,50706:down Vegfa,22339:down Htr2a,15558:down Mmp2,17390:down Gas6,14456:up Pparg,19016:up Glp1r,14652:down Fxyd1,56188:up Col1a2,12843:down Egfr,13649:down Hmox1,15368:up Tgfb3,21814:up Ptgs2,19225:down Stc1,20855:up Ccl4,20303:up Adipoq,11450:up Ceacam1,26365:up Tgfb2,21808:down Vegfb,22340:up S100a1,20193:up                                                                                                                                                                                                                                                                                                                                                                                                                                                                                                                                                                                                                                                                                                                                                                                                                                                                                                                                                                                                                                                                                                                                                                                                                                                                                                                                                                                                  |
| regulation of protein modification process       | GO:0031399 | 7.97E-09 | 2.81E-07 | Igfbp4,16010:up Flrt2,399558:down Sfrp4,20379:up Ccl7,20306:up Ccl2,20296:up C3,12266:up Pdgfc,54635:down Ednrb,13618:up Sema7a,20361:down Igfbp3,16009:up Cd109,235505:down Trf,22041:up Cd24a,12484:down Wnt5a,22418:down Bmpr1a,12166:down Ccl12,20293:up Irl1,16181:up Ccl4,20303:up Adipoq,11450:up Bmp4,12159:up lgf1,16000:up Ret,19713:up Tgfb2,21808:down Ppp3,67916:up Fgfr2,14183:up Kitl,17311:up Htr2b,15559:down Ccl9,20308:up Ccl6,20305:up Inhba,16323:down Aspn,66695:down Ccl3,20302:up Crif1,12931:down Fabp4,11770:up Vegfa,22339:down Htr2a,15558:down Lrrc15,74488:down Nxn,18230:down lgf2,16002:up Gas6,14456:up Tnf,21926:up Fgfr1,14182:down Egfr,13649:down Sfrp1,20377:up C1qtnf3,81799:down Cd4,12504:up Grem1,23892:up Ccl8,20307:up Ceacam1,26365:up Sfrp2,20319:up Fam20a,208659:down Npnt,114249:up Prkar2b,19088:up Tnfrsf11b,18383:up Errf1,74155:down Enpp1,18605:down                                                                                                                                                                                                                                                                                                                                                                                                                                                                                                                                                                                                                                                                                                                                                                                                                                                                                                                |
| negative regulation of cellular process          | GO:0048523 | 8.55E-09 | 3.00E-07 | Fstl3,83554:down Clec2d,93694:up Adm,11535:up Flrt2,399558:down Tmem176b,65963:up Hpgd,15446:up Sfrp4,20379:up Ankrd1,107765:down Cx3cr1,13051:down Igfbp3,16009:up Cd109,235505:down Loxl2,94352:down Plk2,20620:down Loxl3,16950:down Cxcl14,57266:down Cd24a,12484:down Wnt5a,22418:down Stc1,20855:up Irl1,16181:up Maob,109731:up Adipoq,11450:up Bmp4,12159:up lgf1,16000:up Oasl1,231655:up Tgfb2,21808:down Ptgir,19222:up Fgfr2,14183:up Cthrc1,68588:down Htr2b,15559:down Kng1,16644:up Prl2c2,18811:up Efemp1,216616:up Dpysl3,22240:down Slpi,20568:up Aspn,66695:down Vdr,22337:down Fabp4,11770:up Cxl12,20315:up Nabp1,109019:down Htr2a,15558:down Mmp2,17390:down Oas3,246727:up Slc40a1,53945:up Gas6,14456:up Egfr,13649:down Sfrp1,20377:up C1qtnf3,81799:down Tgfb3,21814:up Ceacam1,26365:up Sfrp2,20319:up Serpina3g,20715:up Prkar2b,19088:up Mt1,17748:up S100a1,20193:up Col5a2,12832:down Aldh1a2,19378:up Cst7,13011:up Ednrb,13618:up Epas1,13819:up Htra3,78558:down Gpm6b,14758:up Postn,50706:down Ptx3,19288:up Akr1c18,105349:up Ncam1,17967:down Ccl12,20293:up Bmpr1a,12166:down Wisp1,22402:down Ccl4,20303:up Chst11,58250:down Tnc,21923:down Prg4,96875:down Pdxk,216134:up Ppp3,67916:up Creb3l1,26427:down Irl1,17082:down Kitl,17311:up Fam101b,76566:down Lrrc17,74511:down Ccl9,20308:up Hp,15439:up Inhba,16323:down Plat,18791:down Tfpi2,21789:down Ctla2a,13024:down Crif1,12931:down Vegfa,22339:down Serpine2,20720:up Adamts12,239337:down Lrrc15,74488:down Nxn,18230:down Pparg,19016:up Tnf,21926:up Tmem176a,66058:up Glp1r,14652:down Lmcd1,30937:up Tnfrsf23,79201:down Fgfr1,14182:down Hmox1,15368:up Sulf1,240725:down Sud2,71733:up Ptgs2,19225:down Grem1,23892:up Col3a1,12825:down Serp1g1,12258:up Col5a1,12831:down Errf1,74155:down Enpp1,18605:down |
| circulatory system process                       | GO:0003013 | 9.34E-09 | 3.26E-07 | Htr2b,15559:down Kng1,16644:up Adm,11535:up Ednrb,13618:up Epas1,13819:up Ddah1,69219:down Pdstn,50706:down Vegfa,22339:down Htr2a,15558:down Mmp2,17390:down Gas6,14456:up Pparg,19016:up Glp1r,14652:down Fxyd1,56188:up Col1a2,12843:down Egfr,13649:down Hmox1,15368:up Tgfb3,21814:up Ptgs2,19225:down Stc1,20855:up Ccl4,20303:up Adipoq,11450:up Ceacam1,26365:up Tgfb2,21808:down Vegfb,22340:up S100a1,20193:up                                                                                                                                                                                                                                                                                                                                                                                                                                                                                                                                                                                                                                                                                                                                                                                                                                                                                                                                                                                                                                                                                                                                                                                                                                                                                                                                                                                                  |
| smooth muscle cell proliferation                 | GO:0048659 | 1.16E-08 | 4.01E-07 | Tnf,21926:up Pparg,19016:up Egfr,13649:down Hmox1,15368:up Bmpr1a,12166:down Wisp1,22402:down Ptgs2,19225:down lgf1,16000:up Bmp4,12159:up Adipoq,11450:up Vegfa,22339:down Mmp2,17390:down Igfbp3,16009:up Ptgir,19222:up Fgfr2,14183:up                                                                                                                                                                                                                                                                                                                                                                                                                                                                                                                                                                                                                                                                                                                                                                                                                                                                                                                                                                                                                                                                                                                                                                                                                                                                                                                                                                                                                                                                                                                                                                                 |
| regulation of embryonic development              | GO:0045995 | 1.25E-08 | 4.31E-07 | Col5a2,12832:down Lama2,16773:down Fgfr1,14182:down Sfrp1,20377:up Sulf1,240725:down Ptk7,71461:down Wnt5a,22418:down Bmpr1a,12166:down Irl1,16181:up lgf1,16000:up Bmp4,12159:up Adipoq,11450:up Sfrp2,20319:up Col5a1,12831:down                                                                                                                                                                                                                                                                                                                                                                                                                                                                                                                                                                                                                                                                                                                                                                                                                                                                                                                                                                                                                                                                                                                                                                                                                                                                                                                                                                                                                                                                                                                                                                                        |
| response to oxygen-containing compound           | GO:1901700 | 1.26E-08 | 4.31E-07 | Col5a2,12832:down Adm,11535:up Mrc1,17533:up Ccl7,20306:up Ccl2,20296:up Aldh1a2,19378:up Pdgfc,54635:down Ednrb,13618:up Ankrd1,107765:down Postn,50706:down Cdo1,12583:up Akr1c18,105349:up Ncam1,17967:down Ccl12,20293:up Adipoq,11450:up Bmp4,12159:up lgf1,16000:up Cxl9,17329:up Gatm,67092:down Ret,19713:up Tgfb2,21808:down Ptgir,19222:up Htr2b,15559:down Hp,15439:up Ptk7,71461:down Inhba,16323:down Slpi,20568:up Vdr,22337:down Htr2a,15558:down Mmp2,17390:down lgf2,16002:up Pparg,19016:up Gas6,14456:up Tnf,21926:up Col1a2,12843:down Glp1r,14652:down Egfr,13649:down Hmox1,15368:up Sfrp1,20377:up Tgfb3,21814:up Ptgs2,19225:down Col3a1,12825:down Serpina3g,20715:up Tnfrsf11b,18383:up Enpp1,18605:down Mt1,17748:up                                                                                                                                                                                                                                                                                                                                                                                                                                                                                                                                                                                                                                                                                                                                                                                                                                                                                                                                                                                                                                                                           |
| regulation of cellular protein metabolic process | GO:0032268 | 1.33E-08 | 4.53E-07 | Igfbp4,16010:up Flrt2,399558:down Sfrp4,20379:up C3,12266:up Igfbp3,16009:up Cd109,235505:down Plk2,20620:down Trf,22041:up Cd24a,12484:down Wnt5a,22418:down Irl1,16181:up Adipoq,11450:up Bmp4,12159:up lgf1,16000:up Tgfb2,21808:down F3,14066:up Fgfr2,14183:up Htr2b,15559:down Kng1,16644:up Ccl6,20305:up Slpi,20568:up Aspn,66695:down Fabp4,11770:up Htr2a,15558:down Gas6,14456:up Egfr,13649:down Sfrp1,20377:up C1qtnf3,81799:down Ceacam1,26365:up Ccl8,20307:up Sfrp2,20319:up Serpina3g,20715:up Fam20a,208659:down Npnt,114249:up Tnfrsf11b,18383:up Prkar2b,19088:up Ccl2,20296:up Ccl7,20306:up Cst7,13011:up Ednrb,13618:up Pdgfc,54635:down Sema7a,20361:down Uchl5,56207:up Ccl12,20293:up Bmpr1a,12166:down Ccl4,20303:up Ret,19713:up Ppp3,67916:up Kitl,17311:up Ccl9,20308:up Inhba,16323:down Ccl3,20302:up Plat,18791:down Tfpi2,21789:down Ctla2a,13024:down Crif1,12931:down Vegfa,22339:down Serpine2,20720:up Lrrc15,74488:down lgf2,16002:up Nxn,18230:down Pparg,19016:up Tnf,21926:up Fgfr1,14182:down Cd4,12504:up Grem1,23892:up Serp1g1,12258:up Enpp1,18605:down Errf1,74155:down                                                                                                                                                                                                                                                                                                                                                                                                                                                                                                                                                                                                                                                                                                   |
| morphogenesis of an epithelium                   | GO:0002009 | 1.41E-08 | 4.77E-07 | Cthrc1,68588:down Adm,11535:up Plxnd1,67784:up Ptk7,71461:down Aldh1a2,19378:up Mgp,17313:up Vdr,22337:down Cxl12,20315:up Vegfa,22339:down Mmp2,17390:down Adamts12,239337:down Tnf,21926:up Fgfr1,14182:down Egfr,13649:down Sfrp1,20377:up Sulf1,240725:down Wnt5a,22418:down Grem1,23892:up Bmp4,12159:up lgf1,16000:up Sfrp2,20319:up Tnc,21923:down Col5a1,12831:down Ret,19713:up Tgfb2,21808:down Rspo2,239405:up Aldh1a3,56847:down Npnt,114249:up Fgfr2,14183:up                                                                                                                                                                                                                                                                                                                                                                                                                                                                                                                                                                                                                                                                                                                                                                                                                                                                                                                                                                                                                                                                                                                                                                                                                                                                                                                                                |
| leukocyte migration                              | GO:0050900 | 1.54E-08 | 5.20E-07 | Ccl9,20308:up Ccl6,20305:up Ccl7,20306:up Ccl2,20296:up Figf,14205:up Ednrb,13618:up Ccl3,20302:up Cxl12,20315:up Cx3cr1,13051:down Gas6,14456:up Tnf,21926:up Cxl14,57266:down Cd24a,12484:down Wnt5a,22418:down Ccl12,20293:up Ccl4,20303:up Grem1,23892:up Ccl8,20307:up Cxl9,17329:up Kitl,17311:up                                                                                                                                                                                                                                                                                                                                                                                                                                                                                                                                                                                                                                                                                                                                                                                                                                                                                                                                                                                                                                                                                                                                                                                                                                                                                                                                                                                                                                                                                                                   |

|                                             |            |          |          |                                                                                                                                                                                                                                                                                                                                                                                                                                                                                                                                                                                                                                                                                                                                                                                                                                                                                                                                                                                                                                                                                                                                                                                    |
|---------------------------------------------|------------|----------|----------|------------------------------------------------------------------------------------------------------------------------------------------------------------------------------------------------------------------------------------------------------------------------------------------------------------------------------------------------------------------------------------------------------------------------------------------------------------------------------------------------------------------------------------------------------------------------------------------------------------------------------------------------------------------------------------------------------------------------------------------------------------------------------------------------------------------------------------------------------------------------------------------------------------------------------------------------------------------------------------------------------------------------------------------------------------------------------------------------------------------------------------------------------------------------------------|
| regulation of apoptotic process             | GO:0042981 | 1.63E-08 | 5.48E-07 | Adm,11535:up Sfrp4,20379:up Aldh1a2,19378:up Ednrb,13618:up Ankrd1,107765:down Tnfrsf12a,27279:down Cx3cr1,13051:down lgfbp3,16009:up Plk2,20620:down Akr1c18,105349:up Cd24a,12484:down Wnt5a,22418:down Ccl12,20293:up Il1rn,16181:up Adipoq,11450:up Bmp4,12159:up lgf1,16000:up Chst11,58250:down Tgfb2,21808:down Pdk,216134:up Sdf2l1,64136:up Aldh1a3,56847:down Creb3l1,26427:down Fgfr2,14183:up F3,14066:up Kitl,17311:up Htr2b,15559:down Inhba,16323:down Ccl3,20302:up Vdr,22337:down Crif1,12931:down Cxl12,20315:up Vegfa,22339:down Mmp2,17390:down Slc40a1,53945:up Pparg,19016:up Gas6,14456:up Tnf,21926:up Glp1r,14652:down Tnfrsf23,79201:down Fgfr1,14182:down Egfr,13649:down Hmox1,15368:up Sfrp1,20377:up Tgfb3,21814:up Ptgs2,19225:down Grem1,23892:up Ceacam1,26365:up Sfrp2,20319:up Tnfrsf11b,18383:up Mt1,17748:up                                                                                                                                                                                                                                                                                                                                  |
| intracellular signal transduction           | GO:0035556 | 1.66E-08 | 5.52E-07 | lgfbp4,16010:up Flrt2,399558:down Sfrp4,20379:up C3,12266:up Ankrd1,107765:down lgfbp3,16009:up Plk2,20620:down Trf,22041:up Cd24a,12484:down Wnt5a,22418:down Mark1,226778:up Il1rn,16181:up Adipoq,11450:up Bmp4,12159:up lgf1,16000:up Tgfb2,21808:down Hps,15442:up Ptgir,19222:up Fgfr2,14183:up F3,14066:up Htr2b,15559:down Ccl6,20305:up Aspn,66695:down Mt2,17750:up Saa3,20210:up Cxl12,20315:up Htr2a,15558:down Gas6,14456:up Egfr,13649:down Sfrp1,20377:up C1qtnf3,81799:down Tgfb3,21814:up Ceacam1,26365:up Ccl8,20307:up Sfrp2,20319:up Npnt,114249:up Tnfrsf11b,18383:up Mt1,17748:up Ccl2,20296:up Ccl7,20306:up Pdgc,54635:down Ednrb,13618:up Sema7a,20361:down Clca4,56620:up Dok2,13449:up Akr1c18,105349:up Ncam1,17967:down Ccl12,20293:up Ccl4,20303:up Ret,19713:up Creb3l1,26427:down Kitl,17311:up Il1rl1,17082:down Ccl9,20308:up Ras11a,68895:up Inhba,16323:down Ccl3,20302:up Crif1,12931:down Vegfa,22339:down Serpine2,20720:up Lrrc15,74488:down Hgf2,16002:up Tnf,21926:up Lmcd1,30937:up Col1a2,12843:down Glp1r,14652:down Fgfr1,14182:down Hmox1,15368:up Cd4,12504:up Ptgs2,19225:down Grem1,23892:up Col3a1,12825:down Errfi1,74155:down |
| morphogenesis of a branching structure      | GO:001763  | 1.74E-08 | 5.77E-07 | Adm,11535:up Plxnd1,67784:up Mgp,17313:up Vdr,22337:down Cxl12,20315:up Vegfa,22339:down Tnf,21926:up Fgfr1,14182:down Sfrp1,20377:up Sulf1,240725:down Wnt5a,22418:down Grem1,23892:up Bmp4,12159:up lgf1,16000:up Sfrp2,20319:up Tnc,21923:down Rspo2,239405:up Npnt,114249:up Fgfr2,14183:up                                                                                                                                                                                                                                                                                                                                                                                                                                                                                                                                                                                                                                                                                                                                                                                                                                                                                    |
| regulation of cell death                    | GO:0010941 | 1.87E-08 | 6.18E-07 | Adm,11535:up Sfrp4,20379:up Aldh1a2,19378:up Ednrb,13618:up Ankrd1,107765:down Tnfrsf12a,27279:down Cx3cr1,13051:down lgfbp3,16009:up Plk2,20620:down Akr1c18,105349:up Cd24a,12484:down Ncam1,17967:down Wnt5a,22418:down Ccl12,20293:up Wisp1,22402:down Il1rn,16181:up Adipoq,11450:up Bmp4,12159:up lgf1,16000:up Chst11,58250:down Tgfb2,21808:down Pdk,216134:up Sdf2l1,64136:up Aldh1a3,56847:down Creb3l1,26427:down Fgfr2,14183:up F3,14066:up Kitl,17311:up Htr2b,15559:down Hgf,15439:up Inhba,16323:down Ccl3,20302:up Vdr,22337:down Crif1,12931:down Cxl12,20315:up Vegfa,22339:down Mmp2,17390:down Slc40a1,53945:up Pparg,19016:up Gas6,14456:up Tnf,21926:up Glp1r,14652:down Tnfrsf23,79201:down Fgfr1,14182:down Egfr,13649:down Hmox1,15368:up Sfrp1,20377:up Tgfb3,21814:up Ptgs2,19225:down Grem1,23892:up Ceacam1,26365:up Sfrp2,20319:up Tnfrsf11b,18383:up Mt1,17748:up                                                                                                                                                                                                                                                                                   |
| negative regulation of cell differentiation | GO:0045596 | 1.93E-08 | 6.34E-07 | Fstl3,83554:down Col5a2,12832:down Clec2d,93694:up Tmem176b,65963:up Ednrb,13618:up Postn,50706:down Plk2,20620:down Cxl14,57266:down Cd24a,12484:down Wnt5a,22418:down Bmpr1a,12166:down Adipoq,11450:up Bmp4,12159:up lgf1,16000:up Tgfb2,21808:down Fam101b,76566:down Prlc2,18811:up Ccl9,20308:up Lrrc17,74511:down Efemp1,216616:up Dpysl3,22240:down Vegfa,22339:down Adamts12,239337:down Tmem176a,66058:up Tnf,21926:up Pparg,19016:up Fgfr1,14182:down Sfrp1,20377:up Tgfb3,21814:up Grem1,23892:up Col3a1,12825:down Ceacam1,26365:up Sfrp2,20319:up Col5a1,12831:down Enpp1,18605:down                                                                                                                                                                                                                                                                                                                                                                                                                                                                                                                                                                                 |
| peptidyl-tyrosine phosphorylation           | GO:0018108 | 2.33E-08 | 7.62E-07 | Efemp1,216616:up Pdgc,54635:down Crif1,12931:down Vegfa,22339:down Htr2a,15558:down lgf2,16002:up Gas6,14456:up Cd24a,12484:down Egfr,13649:down Fgfr1,14182:down Sfrp1,20377:up Cd4,12504:up Grem1,23892:up Adipoq,11450:up lgf1,16000:up Sfrp2,20319:up Ppp3,67916:up Errfi1,74155:down Fgfr2,14183:up Kitl,17311:up                                                                                                                                                                                                                                                                                                                                                                                                                                                                                                                                                                                                                                                                                                                                                                                                                                                             |
| regulation of programmed cell death         | GO:0043067 | 2.36E-08 | 7.67E-07 | Adm,11535:up Sfrp4,20379:up Aldh1a2,19378:up Ednrb,13618:up Ankrd1,107765:down Tnfrsf12a,27279:down Cx3cr1,13051:down lgfbp3,16009:up Plk2,20620:down Akr1c18,105349:up Cd24a,12484:down Wnt5a,22418:down Ccl12,20293:up Il1rn,16181:up Adipoq,11450:up Bmp4,12159:up lgf1,16000:up Chst11,58250:down Tgfb2,21808:down Pdk,216134:up Sdf2l1,64136:up Aldh1a3,56847:down Creb3l1,26427:down Fgfr2,14183:up F3,14066:up Kitl,17311:up Htr2b,15559:down Inhba,16323:down Ccl3,20302:up Vdr,22337:down Crif1,12931:down Cxl12,20315:up Vegfa,22339:down Mmp2,17390:down Slc40a1,53945:up Pparg,19016:up Gas6,14456:up Tnf,21926:up Glp1r,14652:down Tnfrsf23,79201:down Fgfr1,14182:down Egfr,13649:down Hmox1,15368:up Sfrp1,20377:up Tgfb3,21814:up Ptgs2,19225:down Grem1,23892:up Ceacam1,26365:up Sfrp2,20319:up Tnfrsf11b,18383:up Mt1,17748:up                                                                                                                                                                                                                                                                                                                                  |
| peptidyl-tyrosine modification              | GO:0018212 | 2.50E-08 | 8.07E-07 | Efemp1,216616:up Pdgc,54635:down Crif1,12931:down Vegfa,22339:down Htr2a,15558:down lgf2,16002:up Gas6,14456:up Cd24a,12484:down Egfr,13649:down Fgfr1,14182:down Sfrp1,20377:up Cd4,12504:up Grem1,23892:up Adipoq,11450:up lgf1,16000:up Sfrp2,20319:up Ppp3,67916:up Errfi1,74155:down Fgfr2,14183:up Kitl,17311:up                                                                                                                                                                                                                                                                                                                                                                                                                                                                                                                                                                                                                                                                                                                                                                                                                                                             |
| regulation of system process                | GO:0044057 | 2.52E-08 | 8.10E-07 | Adm,11535:up Inhba,16323:down Ednrb,13618:up Mmp13,17386:up Epas1,13819:up Htr2a,15558:down Mmp2,17390:down Anpep,16790:up Gas6,14456:up Tnf,21926:up Glp1r,14652:down Trf,22041:up Lmcd1,30937:up Fxyd1,56188:up Fgfr1,14182:down Egfr,13649:down Ncam1,17967:down C1qtnf3,81799:down Wisp1,22402:down Ptgs2,19225:down Stc1,20855:up Adipoq,11450:up lgf1,16000:up Tgfb2,21808:down Npnt,114249:up Errfi1,74155:down S100a1,20193:up                                                                                                                                                                                                                                                                                                                                                                                                                                                                                                                                                                                                                                                                                                                                             |
| response to lipid                           | GO:0033993 | 2.61E-08 | 8.35E-07 | Adm,11535:up Mrc1,17533:up Ccl2,20296:up Aldh1a2,19378:up Ednrb,13618:up Ankrd1,107765:down Cdo1,12583:up Akr1c18,105349:up Cd24a,12484:down Ccl12,20293:up Il1rn,16181:up Bmp4,12159:up lgf1,16000:up Cxl9,17329:up Ret,19713:up Tgfb2,21808:down Ptgir,19222:up Inhba,16323:down Ptk7,71461:down Sipi,20568:up Vdr,22337:down Mmp2,17390:down Pappa,18491:down Pparg,19016:up Tnf,21926:up Alpl,11647:up Egfr,13649:down Hmox1,15368:up Sfrp1,20377:up Tgfb3,21814:up Ptgs2,19225:down Tnfrsf11b,18383:up                                                                                                                                                                                                                                                                                                                                                                                                                                                                                                                                                                                                                                                                        |
| tube development                            | GO:0035295 | 3.19E-08 | 1.01E-06 | Adm,11535:up Plxnd1,67784:up Aldh1a2,19378:up Pdgc,54635:down Mgp,17313:up Ednrb,13618:up Epas1,13819:up Wnt5a,22418:down Bmpr1a,12166:down Bmp4,12159:up lgf1,16000:up Tnc,21923:down Ret,19713:up Fgfr2,14183:up Cthrc1,68588:down Ptk7,71461:down Vdr,22337:down Crif1,12931:down Cxl12,20315:up Vegfa,22339:down Serpine2,20720:up Adamts12,239337:down Tnf,21926:up Egfr,13649:down Fgfr1,14182:down Sfrp1,20377:up Grem1,23892:up Col3a1,12825:down Sfrp2,20319:up Rspo2,239405:up Npnt,114249:up Errfi1,74155:down                                                                                                                                                                                                                                                                                                                                                                                                                                                                                                                                                                                                                                                          |

|                                                                          |            |          |          |                                                                                                                                                                                                                                                                                                                                                                                                                                                                                                                                                                                                                                                                                                                                                                                                                                                                                                                                                                                                                                                                                                                                                         |
|--------------------------------------------------------------------------|------------|----------|----------|---------------------------------------------------------------------------------------------------------------------------------------------------------------------------------------------------------------------------------------------------------------------------------------------------------------------------------------------------------------------------------------------------------------------------------------------------------------------------------------------------------------------------------------------------------------------------------------------------------------------------------------------------------------------------------------------------------------------------------------------------------------------------------------------------------------------------------------------------------------------------------------------------------------------------------------------------------------------------------------------------------------------------------------------------------------------------------------------------------------------------------------------------------|
| phosphorylation                                                          | GO:0016310 | 3.68E-08 | 1.16E-06 | Igfbp4,16010:up Flrt2,399558:down Sfrp4,20379:up C3,12266:up Igfbp3,16009:up Cd109,235505:down Plk2,20620:down Trf,22041:up Cd24a,12484:down Wnt5a,22418:down Mark1,226778:up I1rn,16181:up Adipoq,11450:up Bmp4,12159:up Igf1,16000:up Tgfb2,21808:down Fgfr2,14183:up Htr2b,15559:down Efemp1,216616:up Ccl6,20305:up Aspn,66695:down Saa3,20210:up Fabp4,11770:up Htr2a,15558:down Gas6,14456:up Egfr,13649:down Sfrp1,20377:up C1qtnf3,81799:down Tgfb3,21814:up Ceacam1,26365:up Ccl8,20307:up Sfrp2,20319:up Fam20a,208659:down Npnt,114249:up Tnfrsf11b,18383:up Prkar2b,19088:up Ccl2,20296:up Ccl7,20306:up Ednrb,13618:up Pdgfc,54635:down Sema7a,20361:down Dok2,13449:up Ccl12,20293:up Bmpr1a,12166:down Ccl4,20303:up Ret,19713:up Pdxk,216134:up Plpp3,67916:up Kitl,17311:up Ccl9,20308:up Inhba,16323:down Ccl3,20302:up Srxp2,68792:down Crlf1,12931:down Vegfa,22339:down Igf2,16002:up Lrrc15,74488:down Tnf,21926:up Fgfr1,14182:down Cd4,12504:up Grem1,23892:up Enpp1,18605:down Errf1,74155:down Uck2,80914:down                                                                                                                |
| transmembrane receptor protein serine/threonine kinase signaling pathway | GO:0007178 | 3.92E-08 | 1.23E-06 | Fstl3,83554:down Hpgd,15446:up Inhba,16323:down Ccl2,20296:up Aspn,66695:down Htra3,78558:down Cd109,235505:down Trf,22041:up Col1a2,12843:down Sfrp1,20377:up Sulf1,240725:down Tgfb3,21814:up Bmpr1a,12166:down Wnt5a,22418:down Grem1,23892:up Bmp4,12159:up Col3a1,12825:down Chst1,158250:down Sfrp2,20319:up Tgfb2,21808:down Npnt,114249:up                                                                                                                                                                                                                                                                                                                                                                                                                                                                                                                                                                                                                                                                                                                                                                                                      |
| positive regulation of cellular protein metabolic process                | GO:0032270 | 4.52E-08 | 1.41E-06 | Igfbp4,16010:up Ccl7,20306:up Ccl2,20296:up C3,12266:up Pdgfc,54635:down Ednrb,13618:up Sema7a,20361:down Igfbp3,16009:up Plk2,20620:down Trf,22041:up Cd24a,12484:down Wnt5a,22418:down Bmpr1a,12166:down Ccl12,20293:up I1rn,16181:up Ccl4,20303:up Adipoq,11450:up Bmp4,12159:up Igf1,16000:up Ret,19713:up Tgfb2,21808:down Plpp3,67916:up Fgfr2,14183:up F3,14066:up Kitl,17311:up Htr2b,15559:down Ccl9,20308:up Ccl6,20305:up Inhba,16323:down Ccl3,20302:up Crlf1,12931:down Vegfa,22339:down Htr2a,15558:down Igf2,16002:up Pparg,19016:up Gas6,14456:up Tnf,21926:up Fgfr1,14182:down Egfr,13649:down C1qtnf3,81799:down Cd4,12504:up Grem1,23892:up Ccl8,20307:up Ceacam1,26365:up Sfrp2,20319:up Fam20a,208659:down Tnfrsf11b,18383:up Npnt,114249:up                                                                                                                                                                                                                                                                                                                                                                                       |
| regulation of cellular response to growth factor stimulus                | GO:0090287 | 4.67E-08 | 1.46E-06 | Fstl3,83554:down Figf,14205:up Aspn,66695:down Htra3,78558:down Vegfa,22339:down Adams12,23937:down Cd109,235505:down Fgfr1,14182:down Sfrp1,20377:up Sulf1,240725:down Tgfb3,21814:up Wnt5a,22418:down Grem1,23892:up Bmp4,12159:up Chst1,158250:down Sfrp2,20319:up Npnt,114249:up Fgfr2,14183:up                                                                                                                                                                                                                                                                                                                                                                                                                                                                                                                                                                                                                                                                                                                                                                                                                                                     |
| metal ion homeostasis                                                    | GO:0055065 | 5.35E-08 | 1.66E-06 | Htr2b,15559:down Kng1,16644:up Adm,11535:up Ccl2,20296:up Ednrb,13618:up Ccl3,20302:up Mt2,17750:up Epas1,13819:up Vdr,22337:down Fam132b,227358:down Steap1,70358:down Htr2a,15558:down Slc40a1,53945:up Anpep,16790:up Glp1r,14652:down Fxyd1,56188:up Trf,22041:up Egfr,13649:down Cd24a,12484:down Hmox1,15368:up Cd4,12504:up Stc1,20855:up Tfrc,22042:up Bmp4,12159:up Tgfb2,21808:down Fam20a,208659:down Ptgir,19222:up Mt1,17748:up                                                                                                                                                                                                                                                                                                                                                                                                                                                                                                                                                                                                                                                                                                            |
| regulation of transport                                                  | GO:0051049 | 5.66E-08 | 1.74E-06 | Ice1,218333:down Sfrp4,20379:up Ccl2,20296:up C3,12266:up Ednrb,13618:up Mmp13,17386:up Ankrd1,107765:down Gpm6b,14758:up Clec4n,56620:up Postn,50706:down Hvcn1,74096:up Trf,22041:up Ptx3,19288:up Ncam1,17967:down Wnt5a,22418:down Bmpr1a,12166:down Ccl12,20293:up Stc1,20855:up I1rn,16181:up Ccl4,20303:up Maob,109731:up Adipoq,11450:up Bmp4,12159:up Igf1,16000:up Tgfb2,21808:down I1rl1,17082:down Clec4e,56619:up Htr2b,15559:down Inhba,16323:down Ccl3,20302:up Vdr,22337:down Fam132b,227358:down Cxcl12,20315:up Vegfa,22339:down Htr2a,15558:down Serpine2,20720:up Anpep,16790:up Kdelr3,105785:down Pparg,19016:up Gas6,14456:up Tnf,21926:up Glp1r,14652:down Fxyd1,56188:up Fgfr1,14182:down Egfr,13649:down Lpl,16956:up Hmox1,15368:up Sfrp1,20377:up C1qtnf3,81799:down Cd4,12504:up Ptgs2,19225:down Kcnj15,16516:down Fxyd2,11936:up Sncg,20618:up Grem1,23892:up Ceacam1,26365:up Sfrp2,20319:up Enpp1,18605:down Sc100a1,20193:up                                                                                                                                                                                          |
| ameboidal-type cell migration                                            | GO:0001667 | 5.87E-08 | 1.79E-06 | Htr2b,15559:down Prl2c2,18811:up Plxnd1,67784:up Ednrb,13618:up Sema7a,20361:down Srxp2,68792:down Cxcl12,20315:up Vegfa,22339:down Loxl2,94352:down Fgfr1,14182:down Has2,15117:down Wnt5a,22418:down Tgfb3,21814:up Stc1,20855:up Ptgs2,19225:down Grem1,23892:up Bmp4,12159:up Ceacam1,26365:up Ret,19713:up Tgfb2,21808:down Plpp3,67916:up Kitl,17311:up                                                                                                                                                                                                                                                                                                                                                                                                                                                                                                                                                                                                                                                                                                                                                                                           |
| cellular response to endogenous stimulus                                 | GO:0071495 | 6.04E-08 | 1.83E-06 | Fstl3,83554:down Col5a2,12832:down Flrt2,399558:down Hpgd,15446:up Ccl2,20296:up Pdgfc,54635:down Ankrd1,107765:down Htra3,78558:down Cd109,235505:down Akr1c18,105349:up Wnt5a,22418:down Bmpr1a,12166:down Adipoq,11450:up Bmp4,12159:up Igf1,16000:up Chst1,158250:down Tgfb2,21808:down Ptgir,19222:up Fgfr2,14183:up Htr2b,15559:down Inhba,16323:down Aspn,66695:down Vdr,22337:down Mmp2,17390:down Adams12,239337:down Igf2,16002:up Tnf,21926:up Pparg,19016:up Col1a2,12843:down Egfr,13649:down Fgfr1,14182:down Sfrp1,20377:up Has2,15117:down Sulf1,240725:down Tgfb3,21814:up Grem1,23892:up Col3a1,12825:down Sfrp2,20319:up Npnt,114249:up Enpp1,18605:down                                                                                                                                                                                                                                                                                                                                                                                                                                                                             |
| skeletal system morphogenesis                                            | GO:0048705 | 6.72E-08 | 2.03E-06 | Fam101b,76566:down Bnc2,242509:down Mmp13,17386:up Serpinh1,12406:down Vegfa,22339:down Mmp2,17390:down Alpl,11647:up Col11a1,12814:down Sfrp1,20377:up Has2,15117:down Stc1,20855:up Grem1,23892:up Bmp4,12159:up Chst1,158250:down Sfrp2,20319:up Tbx15,21384:down Tgfb2,21808:down Fgfr2,14183:up                                                                                                                                                                                                                                                                                                                                                                                                                                                                                                                                                                                                                                                                                                                                                                                                                                                    |
| growth                                                                   | GO:0040007 | 6.75E-08 | 2.03E-06 | Igfbp4,16010:up Adm,11535:up Plxnd1,67784:up C3,12266:up Mmp13,17386:up Sema7a,20361:down Htra3,78558:down Tnfrsf12a,27279:down Postn,50706:down Igfbp3,16009:up Ncam1,17967:down Wnt5a,22418:down Bmpr1a,12166:down Wisp1,22402:down Stc1,20855:up Bmp4,12159:up Igf1,16000:up Chst1,158250:down Crabp2,12904:down Tnc,21923:down Tgfb2,21808:down Fgfr2,14183:up Ptk7,71461:down Inhba,16323:down Bnc2,242509:down Ninj1,18081:up Cxcl12,20315:up Vegfa,22339:down Serpine2,20720:up Igf2,16002:up Pparg,19016:up Gas6,14456:up Tnf,21926:up Egfr,13649:down Fgfr1,14182:down Sfrp1,20377:up Tgfb3,21814:up Grem1,23892:up Sfrp2,20319:up Rspo2,23940:down Enpp1,18605:down                                                                                                                                                                                                                                                                                                                                                                                                                                                                           |
| positive regulation of vasculature development                           | GO:1904018 | 7.85E-08 | 2.35E-06 | Prl2c2,18811:up Adm,11535:up Hmox1,15368:up Wnt5a,22418:down C3,12266:up Ptgs2,19225:down Grem1,23892:up Ceacam1,26365:up Srxp2,68792:down Sfrp2,20319:up Ddah1,69219:down Vegfa,22339:down Cx3cr1,13051:down F3,14066:up                                                                                                                                                                                                                                                                                                                                                                                                                                                                                                                                                                                                                                                                                                                                                                                                                                                                                                                               |
| regulation of protein metabolic process                                  | GO:0051246 | 8.71E-08 | 2.59E-06 | Igfbp4,16010:up Flrt2,399558:down Sfrp4,20379:up C3,12266:up Igfbp3,16009:up Cd109,235505:down Plk2,20620:down Trf,22041:up Cd24a,12484:down Wnt5a,22418:down I1rn,16181:up Adipoq,11450:up Bmp4,12159:up Igf1,16000:up Tgfb2,21808:down F3,14066:up Fgfr2,14183:up Htr2b,15559:down Kng1,16644:up Ccl6,20305:up Slpi,20568:up Aspn,66695:down Fabp4,11770:up Htr2a,15558:down Gas6,14456:up Egfr,13649:down Sfrp1,20377:up C1qtnf3,81799:down Ceacam1,26365:up Ccl8,20307:up Sfrp2,20319:up Serpina3g,20715:up Fam20a,208659:down Npnt,114249:up Tnfrsf11b,18383:up Prkar2b,19088:up Ccl2,20296:up Ccl7,20306:up Cst7,13011:up Ednrb,13618:up Pdgfc,54635:down Sema7a,20361:down Uchl5,56207:up Ptx3,19288:up Ccl12,20293:up Bmpr1a,12166:down Ccl4,20303:up Ret,19713:up Prg4,96875:down Plpp3,67916:up Kitl,17311:up Ccl9,20308:up Inhba,16323:down Ccl3,20302:up Plat,18791:down Tfpi2,21789:down Ctla2a,13024:down Crlf1,12931:down Vegfa,22339:down Serpine2,20720:up Lrrc15,74488:down Igf2,16002:up Nxn,18230:down Pparg,19016:up Tnf,21926:up Fgfr1,14182:down Cd4,12504:up Grem1,23892:up Serping1,12258:up Errf1,74155:down Enpp1,18605:down |



|                                                                  |            |          |          |                                                                                                                                                                                                                                                                                                                                                                                                                                                                                                                                                                                                                                                                                                                                                                                                                                                                              |
|------------------------------------------------------------------|------------|----------|----------|------------------------------------------------------------------------------------------------------------------------------------------------------------------------------------------------------------------------------------------------------------------------------------------------------------------------------------------------------------------------------------------------------------------------------------------------------------------------------------------------------------------------------------------------------------------------------------------------------------------------------------------------------------------------------------------------------------------------------------------------------------------------------------------------------------------------------------------------------------------------------|
| regulation of peptidyl-tyrosine phosphorylation                  | GO:0050730 | 9.33E-08 | 2.76E-06 | Pdgfc,54635:down Crif1,12931:down Vegfa,22339:down Htr2a,15558:down lgf2,16002:up Gas6,14456:up Cd24a,12484:down Egfr,13649:down Sfrp1,20377:up Cd4,12504:up Grem1,23892:up Adipoq,11450:up lgf1,16000:up Sfrp2,20319:up Ppp3,67916:up Errfi1,74155:down Kitl,17311:up                                                                                                                                                                                                                                                                                                                                                                                                                                                                                                                                                                                                       |
| prostate gland epithelium morphogenesis                          | GO:0060740 | 9.65E-08 | 2.84E-06 | Sfrp1,20377:up Sulf1,240725:down Wnt5a,22418:down lgf1,16000:up Bmp4,12159:up Tnc,21923:down Mmp2,17390:down Fgfr2,14183:up                                                                                                                                                                                                                                                                                                                                                                                                                                                                                                                                                                                                                                                                                                                                                  |
| inorganic ion homeostasis                                        | GO:0098771 | 1.00E-07 | 2.94E-06 | Htr2b,15559:down Kng1,16644:up Adm,11535:up Sfrp4,20379:up Ccl2,20296:up Ednrb,13618:up Ccl3,20302:up Mt2,17750:up Epas1,13819:up Vdr,22337:down Fam132b,227358:down Steap1,70358:down Htr2a,15558:down Slc40a1,53945:up Anpep,16790:up Glp1r,14652:down Fxyd1,56188:up Trf,22041:up Egfr,13649:down Cd24a,12484:down Hmox1,15368:up Cd4,12504:up Tfrc,22042:up Stc1,20855:up Bmp4,12159:up Tgfb2,21808:down Fam20a,208659:down Ptgir,19222:up Enpp1,18605:down Mt1,17748:up                                                                                                                                                                                                                                                                                                                                                                                                 |
| system process                                                   | GO:0003008 | 1.05E-07 | 3.05E-06 | Adm,11535:up Ednrb,13618:up Mmp13,17386:up Epas1,13819:up Ddan1,69219:down Snrnm4,208431:down Postn,50706:down Cx3cr1,13051:down Plk2,20620:down Trf,22041:up Ncam1,17967:down Mme1,7380:up Wisp1,22402:down Stc1,20855:up Iir1,16181:up Ccl4,20303:up Adipoq,11450:up Bmp4,12159:up lgf1,16000:up Tgfb2,21808:down Vegfb,22340:up Aldh1a3,56847:down Htr2b,15559:down Kng1,16644:up Inhba,16323:down Vdr,22337:down Vegfa,22339:down Htr2a,15558:down Mmp2,17390:down Serpine2,20720:up lgf2,16002:up Anpep,16790:up Pparg,19016:up Gas6,14456:up Tnf,21926:up Glp1r,14652:down Lmcd1,30937:up Fxyd1,56188:up Col1a2,12843:down Fgfr1,14182:down Egfr,13649:down Col11a1,12814:down Hmox1,15368:up Sulf1,240725:down C1qtnf3,81799:down Tgfb3,21814:up Ptgs2,19225:down Ceacam1,26365:up Mcoln3,171166:up Prkar2b,19088:up Npnt,114249:up Errfi1,74155:down S100a1,20193:up |
| response to interferon-gamma                                     | GO:0034341 | 1.07E-07 | 3.12E-06 | Pparg,19016:up Ccl9,20308:up Ccl6,20305:up Mrc1,17533:up Ccl7,20306:up Ccl2,20296:up Ccl12,20293:up Ccl4,20303:up Ccl3,20302:up Ccl8,20307:up                                                                                                                                                                                                                                                                                                                                                                                                                                                                                                                                                                                                                                                                                                                                |
| positive regulation of angiogenesis                              | GO:0045766 | 1.14E-07 | 3.29E-06 | Pr12c2,18811:up Adm,11535:up Hmox1,15368:up Wnt5a,22418:down C3,12266:up Ptgs2,19225:down Grem1,23892:up Srxp2,68792:down Sfrp2,20319:up Ddah1,69219:down Vegfa,22339:down Cx3cr1,13051:down F3,14066:up                                                                                                                                                                                                                                                                                                                                                                                                                                                                                                                                                                                                                                                                     |
| prostate gland morphogenesis                                     | GO:0060512 | 1.24E-07 | 3.57E-06 | Sfrp1,20377:up Sulf1,240725:down Wnt5a,22418:down lgf1,16000:up Bmp4,12159:up Tnc,21923:down Mmp2,17390:down Fgfr2,14183:up                                                                                                                                                                                                                                                                                                                                                                                                                                                                                                                                                                                                                                                                                                                                                  |
| myoblast differentiation                                         | GO:0045445 | 1.28E-07 | 3.66E-06 | Tnf,21926:up Pr12c2,18811:up Cxcl14,57266:down Ccl9,20308:up Grem1,23892:up lgf1,16000:up Epas1,13819:up Bmp4,12159:up Ccl8,20307:up Cxcl9,17329:up lgfbp3,16009:up                                                                                                                                                                                                                                                                                                                                                                                                                                                                                                                                                                                                                                                                                                          |
| negative regulation of immune system process                     | GO:0002683 | 1.41E-07 | 4.02E-06 | Fstl3,83554:down Clec2d,93694:up Lrrc17,74511:down Tmem176b,65963:up Cxcl12,20315:up lgf2,16002:up Pparg,19016:up Tnf,21926:up Tmem176a,66058:up Cd24a,12484:down Hmox1,15368:up Sfrp1,20377:up Ccl12,20293:up Grem1,23892:up Col3a1,12825:down Adipoq,11450:up Bmp4,12159:up Ceacam1,26365:up Serp1g1,12258:up Tgfb2,21808:down Iir1,17082:down Kitl,17311:up                                                                                                                                                                                                                                                                                                                                                                                                                                                                                                               |
| myeloid leukocyte differentiation                                | GO:0002573 | 1.47E-07 | 4.18E-06 | Fstl3,83554:down Clec2d,93694:up Lrrc17,74511:down Ccl3,20302:up Vegfa,22339:down Cd109,235505:down Pparg,19016:up Tnf,21926:up Trf,22041:up Sfrp1,20377:up Tfrc,22042:up Adipoq,11450:up Bmp4,12159:up Ceacam1,26365:up Tnfrsf9,21950:up Kitl,17311:up                                                                                                                                                                                                                                                                                                                                                                                                                                                                                                                                                                                                                      |
| epithelial tube morphogenesis                                    | GO:0060562 | 1.49E-07 | 4.20E-06 | Cthrc1,68588:down Adm,11535:up Plxnd1,67784:up Ptk7,71461:down Aldh1a2,19378:up Mgp,17131:up Vdr,22337:down Cxcl12,20315:up Vegfa,22339:down Adamts12,239337:down Tnf,21926:up Sfrp1,20377:up Wnt5a,22418:down Grem1,23892:up Bmp4,12159:up lgf1,16000:up Sfrp2,20319:up Tnc,21923:down Ret,19713:up Rspo2,239405:up Npnt,114249:up Fgfr2,14183:up                                                                                                                                                                                                                                                                                                                                                                                                                                                                                                                           |
| regulation of secretion                                          | GO:0051046 | 1.70E-07 | 4.78E-06 | Ednrb,13618:up Mmp13,17386:up Ankrd1,107765:down Clec4n,56620:up Postn,50706:down Ncam1,17967:down Wnt5a,22418:down Iir1,16181:up Stc1,20855:up Maob,109731:up Adipoq,11450:up lgf1,16000:up Tgfb2,21808:down Iir1,17082:down Clec4e,56619:up Htr2b,15559:down Inhba,16323:down Ccl3,20302:up Cxcl12,20315:up Htr2a,15558:down Anpep,16790:up Tnf,21926:up Pparg,19016:up Gas6,14456:up Glp1r,14652:down Egfr,13649:down Fgfr1,14182:down Sfrp1,20377:up Lpl,16956:up Hmox1,15368:up C1qtnf3,81799:down Sncg,20618:up Ceacam1,26365:up                                                                                                                                                                                                                                                                                                                                       |
| hematopoietic or lymphoid organ development                      | GO:0048534 | 1.84E-07 | 5.15E-06 | Fstl3,83554:down Clec2d,93694:up Tmem176b,65963:up Ly9,17085:up Epas1,13819:up Lyl1,17095:up Cd109,235505:down Trf,22041:up Cd24a,12484:down Wnt5a,22418:down Adipoq,11450:up Bmp4,12159:up Ret,19713:up Prg4,96875:down Tgfb2,21808:down Fgfr2,14183:up Clec4e,56619:up Kitl,17311:up Lrrc17,74511:down Inhba,16323:down Ccl3,20302:up Ctla2a,13024:down Vegfa,22339:down Slc40a1,53945:up Tnf,21926:up Pparg,19016:up Gas6,14456:up Tmem176a,66058:up Sfrp1,20377:up Tgfb3,21814:up Cd4,12504:up Tfrc,22042:up Ceacam1,26365:up Sfrp2,20319:up Tnfrsf9,21950:up                                                                                                                                                                                                                                                                                                            |
| gland morphogenesis                                              | GO:0022612 | 1.85E-07 | 5.15E-06 | Tnf,21926:up Fgfr1,14182:down Egfr,13649:down Plxnd1,67784:up Sfrp1,20377:up Sulf1,240725:down Wnt5a,22418:down lgf1,16000:up Bmp4,12159:up Vdr,22337:down Ceacam1,26365:up Tnc,21923:down Mmp2,17390:down Fgfr2,14183:up                                                                                                                                                                                                                                                                                                                                                                                                                                                                                                                                                                                                                                                    |
| heart development                                                | GO:0007507 | 1.95E-07 | 5.42E-06 | Htr2b,15559:down Adm,11535:up Flrt2,399558:down Plxnd1,67784:up Ptk7,71461:down Aldh1a2,19378:up Mmp13,17386:up Ankrd1,107765:down Vegfa,22339:down Mmp2,17390:down Col11a1,12814:down Fgfr1,14182:down Ncam1,17967:down Has2,15117:down Wnt5a,22418:down Tgfb3,21814:up Bmpr1a,12166:down Wisp1,22402:down Grem1,23892:up Bmp4,12159:up lgf1,16000:up Col3a1,12825:down Sfrp2,20319:up Col5a1,12831:down Tgfb2,21808:down Vegfb,22340:up Fgfr2,14183:up                                                                                                                                                                                                                                                                                                                                                                                                                     |
| regulation of catalytic activity                                 | GO:0050790 | 1.96E-07 | 5.42E-06 | Flrt2,399558:down Ccl7,20306:up Ccl2,20296:up Pdgfc,54635:down Cst7,13011:up Cd109,235505:down Trf,22041:up Ptx3,19288:up Cd24a,12484:down Wnt5a,22418:down Ccl12,20293:up Iir1,16181:up Ccl4,20303:up Adipoq,11450:up Bmp4,12159:up lgf1,16000:up Tgfb2,21808:down Fgfr2,14183:up F3,14066:up Kitl,17311:up Htr2b,15559:down Kng1,16644:up Hp,15439:up Cd9,20308:up Ccl6,20305:up Sipi,20568:up Aspn,66695:down Ccl3,20302:up Tfpi2,21789:down Vdr,22337:down Fabp4,11770:up Vegfa,22339:down Htr2a,15558:down Serpine2,20720:up Lrrc15,74488:down Oas3,246727:up lgf2,16002:up Pparg,19016:up Gas6,14456:up Tnf,21926:up Fgfr1,14182:down Egfr,13649:down Sfrp1,20377:up Cd4,12504:up Grem1,23892:up Serinc2,230779:down Ceacam1,26365:up Ccl8,20307:up Sfrp2,20319:up Serp1g1,12258:up Serpina3g,20715:up Npnt,114249:up Prkar2b,19088:up Errfi1,74155:down               |
| transmembrane receptor protein tyrosine kinase signaling pathway | GO:0007169 | 2.18E-07 | 5.97E-06 | lgfbp4,16010:up Flrt2,399558:down Efemp1,216616:up Ccl2,20296:up Pdgfc,54635:down Figf,14205:up Plat,18791:down Vegfa,22339:down lgfbp3,16009:up Adamts12,239337:down lgf2,16002:up Dok2,13449:up Fgfr1,14182:down Egfr,13649:down Sulf1,240725:down Wnt5a,22418:down Adipoq,11450:up Bmp4,12159:up lgf1,16000:up Ceacam1,26365:up Ret,19713:up Ptgir,19222:up Errfi1,74155:down Enpp1,18605:down Fgfr2,14183:up F3,14066:up                                                                                                                                                                                                                                                                                                                                                                                                                                                 |

|                                                                                        |            |          |          |                                                                                                                                                                                                                                                                                                                                                                                                                                                                                                                                                                                                                                                                                                                                                                                                                                                                                                                                                                                                                                                                                                                                                                                                                                                                                                                                                                                                                                                                                                                                                                                                                                                                                                                                                                                                                                    |
|----------------------------------------------------------------------------------------|------------|----------|----------|------------------------------------------------------------------------------------------------------------------------------------------------------------------------------------------------------------------------------------------------------------------------------------------------------------------------------------------------------------------------------------------------------------------------------------------------------------------------------------------------------------------------------------------------------------------------------------------------------------------------------------------------------------------------------------------------------------------------------------------------------------------------------------------------------------------------------------------------------------------------------------------------------------------------------------------------------------------------------------------------------------------------------------------------------------------------------------------------------------------------------------------------------------------------------------------------------------------------------------------------------------------------------------------------------------------------------------------------------------------------------------------------------------------------------------------------------------------------------------------------------------------------------------------------------------------------------------------------------------------------------------------------------------------------------------------------------------------------------------------------------------------------------------------------------------------------------------|
| negative regulation of response to stimulus                                            | GO:0048585 | 2.25E-07 | 6.14E-06 | Fstl3,83554:down Clec2d,93694:up Adm,11535:up Flrt2,399558:down Sfrp4,20379:up Htra3,78558:down Cx3cr1,13051:down Cd109,235505:down Wnt5a,22418:down Ccl12,20293:up I1rn,16181:up Adipoq,11450:up Bmp4,12159:up Igf1,16000:up Chst11,58250:down Tgfb2,21808:down Ptgir,19222:up Creb3l1,26427:down I1r1,17082:down Cthrc1,68588:down Kng1,16644:up Htr2b,15559:down Hp,15439:up Aoah,27052:up Aspn,66695:down Ctla2a,13024:down Cxcl12,20315:up Serpine2,20720:up Adamts12,239337:down Lrrc15,74488:down Igf2,16002:up Nxn,18230:down Pparg,19016:up Gas6,14456:up Tnf,21926:up Tnfrsf2,3,79201:down Hmox1,15368:up Sfrp1,20377:up Sulf1,240725:down C1qtnf3,81799:down Tgfb3,21814:up Grem1,23892:up Col3a1,12825:down Ceacam1,26365:up Sfrp2,20319:up Serping1,12258:up Errfi1,74155:down Enpp1,18605:down                                                                                                                                                                                                                                                                                                                                                                                                                                                                                                                                                                                                                                                                                                                                                                                                                                                                                                                                                                                                                       |
| negative regulation of signaling                                                       | GO:0023057 | 2.29E-07 | 6.24E-06 | Fstl3,83554:down Adm,11535:up Flrt2,399558:down Sfrp4,20379:up Htra3,78558:down Gpm6b,14758:up Cx3cr1,13051:down Cd109,235505:down Plk2,20620:down Wnt5a,22418:down I1rn,16181:up Adipoq,11450:up Bmp4,12159:up Igf1,16000:up Chst11,58250:down Tgfb2,21808:down Ptgir,19222:up Creb3l1,26427:down I1r1,17082:down Cthrc1,68588:down Htr2b,15559:down Aspn,66695:down Cxcl12,20315:up Htr2a,15558:down Serpine2,20720:up Adamts12,239337:down Lrrc15,74488:down Nxn,18230:down Pparg,19016:up Gas6,14456:up Tnf,21926:up Tnfrsf2,3,79201:down Sfrp1,20377:up Hmox1,15368:up Sulf1,240725:down C1qtnf3,81799:down Tgfb3,21814:up Ptgs2,19225:down Grem1,23892:up Ceacam1,26365:up Sfrp2,20319:up Errfi1,74155:down Enpp1,18605:down                                                                                                                                                                                                                                                                                                                                                                                                                                                                                                                                                                                                                                                                                                                                                                                                                                                                                                                                                                                                                                                                                                 |
| tube morphogenesis                                                                     | GO:0035239 | 2.33E-07 | 6.31E-06 | Cthrc1,68588:down Adm,11535:up Plxnd1,67784:up Ptk7,71461:down Aldh1a2,19378:up Mgp,17313:up Vdr,22337:down Cxcl12,20315:up Vegfa,22339:down Adamts12,239337:down Tnf,21926:up Egfr,13649:down Sfrp1,20377:up Wnt5a,22418:down Grem1,23892:up Bmp4,12159:up Igf1,16000:up Sfrp2,20319:up Tnc,21923:down Ret,19713:up Rspo2,239405:up Npnt,114249:up Fgfr2,14183:up                                                                                                                                                                                                                                                                                                                                                                                                                                                                                                                                                                                                                                                                                                                                                                                                                                                                                                                                                                                                                                                                                                                                                                                                                                                                                                                                                                                                                                                                 |
| regulation of tissue remodeling                                                        | GO:0034103 | 2.35E-07 | 6.35E-06 | Trf,22041:up Egfr,13649:down Cd24a,12484:down Sfrp1,20377:up Tfrc,22042:up Grem1,23892:up Vdr,22337:down Ceacam1,26365:up Vegfa,22339:down Tnfrsf11b,18383:up                                                                                                                                                                                                                                                                                                                                                                                                                                                                                                                                                                                                                                                                                                                                                                                                                                                                                                                                                                                                                                                                                                                                                                                                                                                                                                                                                                                                                                                                                                                                                                                                                                                                      |
| positive regulation of protein transport                                               | GO:0051222 | 2.38E-07 | 6.40E-06 | Htr2b,15559:down Ice1,218333:down Ccl2,20296:up Ccl3,20302:up Mmp13,17386:up Ankrd1,107765:down Clec4n,56620:up Postn,50706:down Gas6,14456:up Tnf,21926:up Glp1r,14652:down Egfr,13649:down Lpl,16956:up C1qtnf3,81799:down Wnt5a,22418:down Grem1,23892:up Bmp4,12159:up Ptgs2,19225:down Grem1,23892:up Bmp4,12159:up Igf1,16000:up Ceacam1,26365:up Sfrp2,20319:up Tgfb2,21808:down I1r1,17082:down Clec4e,56619:up                                                                                                                                                                                                                                                                                                                                                                                                                                                                                                                                                                                                                                                                                                                                                                                                                                                                                                                                                                                                                                                                                                                                                                                                                                                                                                                                                                                                            |
| positive regulation of smooth muscle cell proliferation                                | GO:0048661 | 2.47E-07 | 6.61E-06 | Tnf,21926:up Egfr,13649:down Hmox1,15368:up Bmpr1a,12166:down Wisp1,22402:down Ptgs2,19225:down Igf1,16000:up Bmp4,12159:up Vegfa,22339:down Mmp2,17390:down Fgfr2,14183:up                                                                                                                                                                                                                                                                                                                                                                                                                                                                                                                                                                                                                                                                                                                                                                                                                                                                                                                                                                                                                                                                                                                                                                                                                                                                                                                                                                                                                                                                                                                                                                                                                                                        |
| regulation of transmembrane receptor protein serine/threonine kinase signaling pathway | GO:0090092 | 2.70E-07 | 7.18E-06 | Fstl3,83554:down Inhba,16323:down Aspn,66695:down Htra3,78558:down Cd109,235505:down Sfrp1,20377:up Tgfb3,21814:up Bmpr1a,12166:down Wnt5a,22418:down Sulf1,240725:down Grem1,23892:up Bmp4,12159:up Chst11,58250:down Sfrp2,20319:up Tgfb2,21808:down Npnt,114249:up                                                                                                                                                                                                                                                                                                                                                                                                                                                                                                                                                                                                                                                                                                                                                                                                                                                                                                                                                                                                                                                                                                                                                                                                                                                                                                                                                                                                                                                                                                                                                              |
| secretion                                                                              | GO:0046903 | 2.85E-07 | 7.56E-06 | Adm,11535:up Ednrb,13618:up Mmp13,17386:up Ankrd1,107765:down Clec4n,56620:up Postn,50706:down Cdo1,12583:up Ncam1,17967:down Wnt5a,22418:down Stc1,20855:up I1rn,16181:up Maob,109731:up Adipoq,11450:up Igf1,16000:up Tgfb2,21808:down Creb3l1,26427:down I1r1,17082:down Clec4e,56619:up Htr2b,15559:down Inhba,16323:down Ccl3,20302:up Vdr,22337:down Cxcl12,20315:up Vegfa,22339:down Htr2a,15558:down Serpine2,20720:up Anpep,16790:up Pparg,19016:up Gas6,14456:up Tnf,21926:up Glp1r,14652:down Egfr,13649:down Fgfr1,14182:down Sfrp1,20377:up Lpl,16956:up Hmox1,15368:up C1qtnf3,81799:down Sncg,20618:up Ceacam1,26365:up Sytn13,80976:up                                                                                                                                                                                                                                                                                                                                                                                                                                                                                                                                                                                                                                                                                                                                                                                                                                                                                                                                                                                                                                                                                                                                                                             |
| single-organism metabolic process                                                      | GO:0044710 | 2.91E-07 | 7.67E-06 | Igf1,16000:up Adm,11535:up Hpgd,15446:up Sfrp4,20379:up C3,12266:up Enpp5,83965:up Serpinh1,12406:down Gstt1,14871:up Blvrb,233016:up Igf1,16000:up Ggt5,23887:up Loxl2,94352:down Loxl3,16950:down Trf,22041:up Cd24a,12484:down Mme,17380:up Wnt5a,22418:down I1rn,16181:up Maob,109731:up Igf1,16000:up Adipoq,11450:up Bmp4,12159:up Hal,15109:up Crabp2,12904:down Tgfb2,21808:down Hpse,15442:up Ptgir,19222:up Fgfr2,14183:up Htr2b,15559:down Ccl6,20305:up Gdpd1,66569:up Vdr,22337:down Fabp4,11770:up Fam132b,227358:down Nabp1,109019:down Htr2a,15558:down Mmp2,17390:down Gas6,14456:up Egfr,13649:down Sfrp1,20377:up C1qtnf3,81799:down Tgfb3,21814:up C1rb,66727:up Tfrc,22042:up Serinc2,230779:down Ceacam1,26365:up Ccl8,20307:up Sfrp2,20319:up Pxdn,69675:down Npnt,114249:up Tnfrsf11b,18383:up Prkar2b,19088:up Aldh1a2,19378:up Ccl2,20296:up Ccl7,20306:up Pdgfr,54635:down Ampd3,11717:up Mmp13,17386:up Sema7a,20361:down Marc1,66112:up Sox10,20322:up Uchl5,56207:up Ddah1,69219:down Steap1,70358:down Npl,74091:up Enpp3,209558:down Man2a2,140481:up Cdo1,12583:up Dok2,13449:up Mamdc2,71738:down Akr1c18,105349:up Fabp5,16592:up Ccl12,20293:up Ccl4,20303:up Chst11,58250:down Gatm,67092:down Ret,19713:up C1s2,317677:up Ppdk,216134:up Vegfb,22340:up Sdf2l1,64136:up Aldh1a3,56847:down Plpp3,67916:up Mrc2,17534:down Kitl,17311:up P4ha1,18451:down Hp,15439:up Ccl9,20308:up Inhba,16323:down Aoah,27052:up Ccl3,20302:up C1s1,50908:up Plod2,26432:down Vegfa,22339:down Gfpt2,14584:down Cbr2,12409:up Nxn,18230:down Igf2,16002:up Pparg,19016:up Tnf,21926:up Lmcd1,30937:up Fgfr1,14182:down Has2,15117:down Lpl,16956:up Hmox1,15368:up Sulf1,240725:down Ptgs2,19225:down Grem1,23892:up Col5a1,12831:down Serping1,12258:up Uck2,80914:down Errfi1,74155:down Enpp1,18605:down |
| branching morphogenesis of an epithelial tube                                          | GO:0048754 | 3.40E-07 | 8.89E-06 | Tnf,21926:up Plxnd1,67784:up Wnt5a,22418:down Mgp,17313:up Grem1,23892:up Igf1,16000:up Bmp4,12159:up Vdr,22337:down Sfrp2,20319:up Tnc,21923:down Cxcl12,20315:up Vegfa,22339:down Rspo2,239405:up Npnt,114249:up Fgfr2,14183:up                                                                                                                                                                                                                                                                                                                                                                                                                                                                                                                                                                                                                                                                                                                                                                                                                                                                                                                                                                                                                                                                                                                                                                                                                                                                                                                                                                                                                                                                                                                                                                                                  |
| developmental growth                                                                   | GO:0048589 | 3.45E-07 | 8.99E-06 | Adm,11535:up Plxnd1,67784:up Ptk7,71461:down C3,12266:up Bnc2,242509:down Nin1,18081:up Mmp13,17386:up Sema7a,20361:down Tnfrsf12a,27279:down Cxcl12,20315:up Postn,50706:down Vegfa,22339:down Igf2,16002:up Fgfr1,14182:down Ncam1,17967:down Sfrp1,20377:up Wnt5a,22418:down Tgfb3,21814:up Bmpr1a,12166:down Wisp1,22402:down Stc1,20855:up Bmp4,12159:up Igf1,16000:up Chst11,58250:down Crabp2,12904:down Sfrp2,20319:up Tnc,21923:down Tgfb2,21808:down Rspo2,239405:up Fgfr2,14183:up                                                                                                                                                                                                                                                                                                                                                                                                                                                                                                                                                                                                                                                                                                                                                                                                                                                                                                                                                                                                                                                                                                                                                                                                                                                                                                                                      |
| negative regulation of cell communication                                              | GO:0010648 | 3.49E-07 | 9.05E-06 | Fstl3,83554:down Adm,11535:up Flrt2,399558:down Sfrp4,20379:up Htra3,78558:down Gpm6b,14758:up Cx3cr1,13051:down Cd109,235505:down Plk2,20620:down Wnt5a,22418:down I1rn,16181:up Adipoq,11450:up Bmp4,12159:up Igf1,16000:up Chst11,58250:down Tgfb2,21808:down Ptgir,19222:up Creb3l1,26427:down I1r1,17082:down Cthrc1,68588:down Htr2b,15559:down Aspn,66695:down Cxcl12,20315:up Htr2a,15558:down Serpine2,20720:up Adamts12,239337:down Lrrc15,74488:down Nxn,18230:down Pparg,19016:up Gas6,14456:up Tnf,21926:up Tnfrsf2,3,79201:down Sfrp1,20377:up Hmox1,15368:up Sulf1,240725:down C1qtnf3,81799:down Tgfb3,21814:up Ptgs2,19225:down Grem1,23892:up Ceacam1,26365:up Sfrp2,20319:up Errfi1,74155:down Enpp1,18605:down                                                                                                                                                                                                                                                                                                                                                                                                                                                                                                                                                                                                                                                                                                                                                                                                                                                                                                                                                                                                                                                                                                 |

|                                                          |            |          |          |                                                                                                                                                                                                                                                                                                                                                                                                                                                                                                                                                                                                                                                                                                                                                                    |
|----------------------------------------------------------|------------|----------|----------|--------------------------------------------------------------------------------------------------------------------------------------------------------------------------------------------------------------------------------------------------------------------------------------------------------------------------------------------------------------------------------------------------------------------------------------------------------------------------------------------------------------------------------------------------------------------------------------------------------------------------------------------------------------------------------------------------------------------------------------------------------------------|
| collagen metabolic process                               | GO:0032963 | 3.64E-07 | 9.41E-06 | Pparg,19016:up Tgfb3,21814:up Ccl2,20296:up Mmp13,17386:up Bmp4,12159:up Serpinh1,12406:down Col5a1,12831:down Mmp2,17390:down Errf1,74155:down Mr2,17534:down                                                                                                                                                                                                                                                                                                                                                                                                                                                                                                                                                                                                     |
| positive regulation of protein metabolic process         | GO:0051247 | 3.99E-07 | 1.02E-05 | Igfbp4,16010:up Ccl7,20306:up Ccl2,20296:up C3,12266:up Pdgfc,54635:down Ednrb,13618:up Sema7a,20361:down Igfbp3,16009:up Plk2,20620:down Trf,22041:up Cd24a,12484:down Wnt5a,22418:down Bmpr1a,12166:down Ccl12,20293:up Il1rn,16181:up Ccl4,20303:up Adipoq,11450:up Bmp4,12159:up Igf1,16000:up Ret,19713:up Tgfb2,21808:down Ppp3,67916:up Fgfr2,14183:up F3,14066:up Kitl,17311:up Htr2b,15559:down Ccl9,20308:up Ccl6,20305:up Inhba,16323:down Ccl3,20302:up Crlf1,12931:down Vegfa,22339:down Htr2a,15558:down Igf2,16002:up Pparg,19016:up Gas6,14456:up Tnf,21926:up Fgfr1,14182:down Egfr,13649:down C1qtnf3,81799:down Ccl4,12504:up Grem1,23892:up Ccl8,20307:up Ceacam1,26365:up Sfrp2,20319:up Fam20a,208659:down Tnfrsf11b,18383:up Npnt,114249:up |
| hemopoiesis                                              | GO:0030097 | 4.19E-07 | 1.07E-05 | Fstl3,83554:down Clec2d,93694:up Tmem176b,65963:up Ly9,17085:up Epas1,13819:up Lyl1,17095:up Cd109,235505:down Trf,22041:up Cd24a,12484:down Wnt5a,22418:down Adipoq,11450:up Bmp4,12159:up Prg4,96875:down Tgfb2,21808:down Fgfr2,14183:up Clec4e,56619:up Kitl,17311:up Lrrc17,74511:down Inhba,16323:down Ccl3,20302:up Ctla2a,13024:down Vegfa,22339:down Tnf,21926:up Pparg,19016:up Gas6,14456:up Tmem176a,66058:up Sfrp1,20377:up Tgfb3,21814:up Cd4,12504:up Tfrc,22042:up Ceacam1,26365:up Sfrp2,20319:up Tnfsf9,21950:up                                                                                                                                                                                                                                 |
| multicellular organismal macromolecule metabolic process | GO:0044259 | 4.20E-07 | 1.07E-05 | Pparg,19016:up Tgfb3,21814:up Ccl2,20296:up Mmp13,17386:up Bmp4,12159:up Serpinh1,12406:down Col5a1,12831:down Mmp2,17390:down Errf1,74155:down Mr2,17534:down                                                                                                                                                                                                                                                                                                                                                                                                                                                                                                                                                                                                     |
| embryonic morphogenesis                                  | GO:0048598 | 4.22E-07 | 1.07E-05 | Cthrc1,68588:down Htr2b,15559:down Col5a2,12832:down Adm,11535:up Ptk7,71461:down Inhba,16323:down Gjb5,14622:down Aldh1a2,19378:up Fgfr1,14182:down Col11a1,12814:down Sfrp1,20377:up Sulf1,240725:down Wnt5a,22418:down Bmpr1a,12166:down Il1rn,16181:up Grem1,23892:up Adipoq,11450:up Bmp4,12159:up Chst11,58250:down Crabp2,12904:down Sfrp2,20319:up Tbx15,21384:down Col5a1,12831:down Ret,19713:up Tgfb2,21808:down Rspo2,239405:up Aldh1a3,56847:down Ppp3,67916:up Fgfr2,14183:up                                                                                                                                                                                                                                                                        |
| regulation of MAP kinase activity                        | GO:0043405 | 4.27E-07 | 1.07E-05 | Htr2b,15559:down Pdgfc,54635:down Vegfa,22339:down Htr2a,15558:down Tnf,21926:up Trf,22041:up Cd24a,12484:down Egfr,13649:down Fgfr1,14182:down Sfrp1,20377:up Wnt5a,22418:down Il1rn,16181:up Adipoq,11450:up Bmp4,12159:up Igf1,16000:up Ceacam1,26365:up Sfrp2,20319:up Kitl,17311:up                                                                                                                                                                                                                                                                                                                                                                                                                                                                           |
| chemotaxis                                               | GO:0006935 | 4.37E-07 | 1.09E-05 | Flrt2,399558:down Lama2,16773:down Ccl9,20308:up Plxnd1,67784:up Ccl6,20305:up Ccl7,20306:up Ccl2,20296:up Figf,14205:up Ednrb,13618:up Ccl3,20302:up Saa3,20210:up Cxcr6,80901:down Cxcl12,20315:up Vegfa,22339:down Cx3cr1,13051:down Gas6,14456:up Cxcl14,57266:down Fgfr1,14182:down Wnt5a,22418:down Ccl12,20293:up Ccl4,20303:up Grem1,23892:up Ccl8,20307:up Cxcl9,17329:up Tgfb2,21808:down                                                                                                                                                                                                                                                                                                                                                                |
| regulation of growth                                     | GO:0040008 | 4.43E-07 | 1.10E-05 | Igfbp4,16010:up Plxnd1,67784:up Inhba,16323:down C3,12266:up Sema7a,20361:down Htra3,78558:down Tnfrsf12a,27279:down Cxcl12,20315:up Vegfa,22339:down Serpine2,20720:up Igfbp3,16009:up Igf2,16002:up Gas6,14456:up Pparg,19016:up Tnf,21926:up Fgfr1,14182:down Egfr,13649:down Ncam1,17967:down Sfrp1,20377:up Wnt5a,22418:down Bmpr1a,12166:down Wisp1,22402:down Grem1,23892:up Bmp4,12159:up Igf1,16000:up Crabp2,12904:down Sfrp2,20319:up Tgfb2,21808:down Enpp1,18605:down Fgfr2,14183:up                                                                                                                                                                                                                                                                  |
| leukocyte differentiation                                | GO:0002521 | 4.55E-07 | 1.12E-05 | Fstl3,83554:down Clec2d,93694:up Lrrc17,74511:down Tmem176b,65963:up Ly9,17085:up Ccl3,20302:up Ctla2a,13024:down Lyl1,17095:up Vegfa,22339:down Cd109,235505:down Tmem176a,66058:up Gas6,14456:up Pparg,19016:up Tnf,21926:up Trf,22041:up Cd24a,12484:down Sfrp1,20377:up Cd4,12504:up Tfrc,22042:up Adipoq,11450:up Bmp4,12159:up Ceacam1,26365:up Kitl,17311:up Tnfsf9,21950:up Clec4e,56619:up                                                                                                                                                                                                                                                                                                                                                                |
| taxis                                                    | GO:0042330 | 4.75E-07 | 1.17E-05 | Flrt2,399558:down Lama2,16773:down Ccl9,20308:up Plxnd1,67784:up Ccl6,20305:up Ccl7,20306:up Ccl2,20296:up Figf,14205:up Ednrb,13618:up Ccl3,20302:up Saa3,20210:up Cxcr6,80901:down Cxcl12,20315:up Vegfa,22339:down Cx3cr1,13051:down Gas6,14456:up Cxcl14,57266:down Fgfr1,14182:down Wnt5a,22418:down Ccl12,20293:up Ccl4,20303:up Grem1,23892:up Ccl8,20307:up Cxcl9,17329:up Tgfb2,21808:down                                                                                                                                                                                                                                                                                                                                                                |
| positive regulation of cytokine production               | GO:0001819 | 4.83E-07 | 1.18E-05 | Htr2b,15559:down Ly9,17085:up Ccl2,20296:up C3,12266:up Figf,14205:up Ccl3,20302:up Sema7a,20361:down Clec4n,56620:up Postn,50706:down Tnf,21926:up Lpl,16956:up Sulf1,240725:down C1qtnf3,81799:down Wnt5a,22418:down Ptgs2,19225:down Ccl4,20303:up Adipoq,11450:up Hpse,15442:up Tnfsf9,21950:up Clec4e,56619:up Il1rl1,17082:down                                                                                                                                                                                                                                                                                                                                                                                                                              |
| positive regulation of protein secretion                 | GO:0050714 | 4.94E-07 | 1.20E-05 | Htr2b,15559:down Ccl3,20302:up Mmp13,17386:up Ankrd1,107765:down Clec4n,56620:up Postn,50706:down Tnf,21926:up Glp1r,14652:down Egfr,13649:down Lpl,16956:up Wnt5a,22418:down C1qtnf3,81799:down Igf1,16000:up Ceacam1,26365:up Tgfb2,21808:down Clec4e,56619:up Il1rl1,17082:down                                                                                                                                                                                                                                                                                                                                                                                                                                                                                 |
| bone development                                         | GO:0060348 | 4.99E-07 | 1.21E-05 | Fam101b,76566:down Lrrc17,74511:down Alpl,11647:up Has2,15117:down Sulf1,240725:down Pdgfc,54635:down Stc1,20855:down Bnc2,242509:down Grem1,23892:up Mmp13,17386:up Igf1,16000:up Bmp4,12159:up Serpinh1,12406:down Sfrp2,20319:up Fgfr2,14183:up                                                                                                                                                                                                                                                                                                                                                                                                                                                                                                                 |
| positive regulation of cell adhesion                     | GO:0045785 | 5.08E-07 | 1.23E-05 | Fstl3,83554:down Ccl2,20296:up Ninj1,18081:up Cxcl12,20315:up Vegfa,22339:down Smoc2,64074:down Igf2,16002:up Tnf,21926:up Cd24a,12484:down Has2,15117:down Wnt5a,22418:down Cd4,12504:up Tfrc,22042:up Col8a1,12837:down Igf1,16000:up Ceacam1,26365:up Ret,19713:up Tgfb2,21808:down Ppp3,67916:up Npnt,114249:up Tnfsf9,21950:up                                                                                                                                                                                                                                                                                                                                                                                                                                |
| regulation of protein kinase activity                    | GO:0045859 | 5.13E-07 | 1.24E-05 | Htr2b,15559:down Flrt2,399558:down Pdgfc,54635:down Aspn,66695:down Fabp4,11770:up Vegfa,22339:down Htr2a,15558:down Lrrc15,74488:down Gas6,14456:up Tnf,21926:up Trf,22041:up Fgfr1,14182:down Egfr,13649:down Cd24a,12484:down Sfrp1,20377:up Wnt5a,22418:down Cd4,12504:up Il1rn,16181:up Grem1,23892:up Adipoq,11450:up Bmp4,12159:up Igf1,16000:up Ceacam1,26365:up Sfrp2,20319:up Tgfb2,21808:down Prkar2b,19088:up Errf1,74155:down Kitl,17311:up                                                                                                                                                                                                                                                                                                           |
| negative regulation of signal transduction               | GO:0009968 | 5.45E-07 | 1.30E-05 | Fstl3,83554:down Adm,11535:up Flrt2,399558:down Sfrp4,20379:up Htra3,78558:down Cx3cr1,13051:down Cd109,235505:down Wnt5a,22418:down Il1rn,16181:up Adipoq,11450:up Bmp4,12159:up Igf1,16000:up Chst11,58250:down Tgfb2,21808:down Ptgir,19222:up Creb3l1,26427:down Il1rl1,17082:down Htr2b,15559:down Cthrc1,68588:down Aspn,66695:down Cxcl12,20315:up Serpine2,20720:up Adamts12,239337:down Nxn,18230:down Lrrc15,74488:down Tnf,21926:up Pparg,19016:up Gas6,14456:up Tnfrsf23,79201:down Sfrp1,20377:up Hmox1,15368:up Sulf1,240725:down C1qtnf3,81799:down Tgfb3,21814:up Grem1,23892:up Ceacam1,26365:up Sfrp2,20319:up Enpp1,18605:down Errf1,74155:down                                                                                                 |

|                                                                    |            |          |          |                                                                                                                                                                                                                                                                                                                                                                                                                                                                                                                                                                                                                                                                                                                                                                                                                                                                                                                                                                                                                                                                                                                                                                                                                                                                                                                                                                                                                                                                                                                                                                                                                                                                                                                                                                                                                                                                                                                                                                                                                                                                                                                                                                                |
|--------------------------------------------------------------------|------------|----------|----------|--------------------------------------------------------------------------------------------------------------------------------------------------------------------------------------------------------------------------------------------------------------------------------------------------------------------------------------------------------------------------------------------------------------------------------------------------------------------------------------------------------------------------------------------------------------------------------------------------------------------------------------------------------------------------------------------------------------------------------------------------------------------------------------------------------------------------------------------------------------------------------------------------------------------------------------------------------------------------------------------------------------------------------------------------------------------------------------------------------------------------------------------------------------------------------------------------------------------------------------------------------------------------------------------------------------------------------------------------------------------------------------------------------------------------------------------------------------------------------------------------------------------------------------------------------------------------------------------------------------------------------------------------------------------------------------------------------------------------------------------------------------------------------------------------------------------------------------------------------------------------------------------------------------------------------------------------------------------------------------------------------------------------------------------------------------------------------------------------------------------------------------------------------------------------------|
| regulation of molecular function                                   | GO:0065009 | 6.06E-07 | 1.44E-05 | Flrt2,399558:down Plxnd1,67784:up Sfrp4,20379:up Cd109,235505:down Plk2,20620:down Trf,22041:up Cd24a,12484:down Wnt5a,22418:down Il1rn,16181:up Adipoq,11450:up Bmp4,12159:up lgf1,16000:up Tgfb2,21808:down F3,14066:up Fgfr2,14183:up Cthrc1,68588:down Htr2b,15559:down Kng1,16644:up Ccl6,20305:up Slpi,20568:up Aspn,66695:down Vdr,22337:down Fabp4,11770:up Htr2a,15558:down Oas3,246727:up Gas6,14456:up Egfr,13649:down Sfrp1,20377:up Tgfb3,21814:up Fxyd2,11936:up Serinc2,230779:down Ceacam1,26365:up Ccl8,20307:up Sfrp2,20319:up Serpina3g,20715:up Npnt,114249:up Prkar2b,19088:up Sl100a1,20193:up Ccl2,20296:up Ccl7,20306:up Cst7,13011:up Pdgc,54635:down Ptx3,19288:up Ccl12,20293:up Ccl4,20303:up Plpp3,67916:up Kitl,17311:up Ccl9,20308:up Hp,15439:up Ccl3,20302:up Tfpi2,21789:down Vegfa,22339:down Serpine2,20720:up lgf2,16002:up Lrrc15,74488:down Pparg,19016:up Tnf,21926:up Fxyd1,56188:up Fgfr1,14182:down Hmox1,15368:up Cd4,12504:up Grem1,23892:up Serping1,12258:up Errfi1,74155:down                                                                                                                                                                                                                                                                                                                                                                                                                                                                                                                                                                                                                                                                                                                                                                                                                                                                                                                                                                                                                                                                                                                                                  |
| response to transition metal nanoparticle                          | GO:1990267 | 6.31E-07 | 1.49E-05 | Loxl2,94352:down Hvcn1,74096:up Trf,22041:up Hmox1,15368:up Tfrc,22042:up Mt2,17750:up Sord,20322:up Gatm,67092:down Mt1,17748:up Slc40a1,53945:up                                                                                                                                                                                                                                                                                                                                                                                                                                                                                                                                                                                                                                                                                                                                                                                                                                                                                                                                                                                                                                                                                                                                                                                                                                                                                                                                                                                                                                                                                                                                                                                                                                                                                                                                                                                                                                                                                                                                                                                                                             |
| myeloid leukocyte migration                                        | GO:0097529 | 6.56E-07 | 1.54E-05 | Ccl9,20308:up Ccl6,20305:up Ccl7,20306:up Ccl2,20296:up Ccl12,20293:up Figf,14205:up Ednrb,13618:up Grem1,23892:up Ccl4,20303:up Ccl3,20302:up Ccl8,20307:up Cxl12,20315:up Cx3cr1,13051:down                                                                                                                                                                                                                                                                                                                                                                                                                                                                                                                                                                                                                                                                                                                                                                                                                                                                                                                                                                                                                                                                                                                                                                                                                                                                                                                                                                                                                                                                                                                                                                                                                                                                                                                                                                                                                                                                                                                                                                                  |
| muscle structure development                                       | GO:0061061 | 6.65E-07 | 1.55E-05 | Prl2c2,18811:up Adm,11535:up Ccl9,20308:up Ednrb,13618:up Epas1,13819:up Ankrd1,107765:down Cxc12,20315:up Vegfa,22339:down lgfbp3,16009:up lgf2,16002:up Tnf,21926:up Cxl14,57266:down Fgfr1,14182:down Col11a1,12814:down Ncam1,17967:down Wnt5a,22418:down Bmpr1a,12166:down Tgfb3,21814:up Wisp1,22402:down Grem1,23892:up Col3a1,12825:down Bmp4,12159:up lgf1,16000:up Ccl8,20307:up Cxl9,17329:up Tgfb2,21808:down Npnt,114249:up Fgfr2,14183:up                                                                                                                                                                                                                                                                                                                                                                                                                                                                                                                                                                                                                                                                                                                                                                                                                                                                                                                                                                                                                                                                                                                                                                                                                                                                                                                                                                                                                                                                                                                                                                                                                                                                                                                        |
| negative regulation of cell proliferation                          | GO:0008285 | 6.65E-07 | 1.55E-05 | Adm,11535:up Inhba,16323:down Sfrp4,20379:up Aldh1a2,19378:up Vdr,22337:down Serpine2,20720:up lgfbp3,16009:up Cd109,235505:down Tnf,21926:up Pparg,19016:up Cd24a,12484:down Hmox1,15368:up Sfrp1,20377:up Sulf1,240725:down Wnt5a,22418:down Ccl12,20293:up Tgfb3,21814:up Ptgs2,19225:down Grem1,23892:up Adipoq,11450:up Bmp4,12159:up lgf1,16000:up Ceacam1,26365:up Sfrp2,20319:up Tgfb2,21808:down Ptgir,19222:up Fgfr2,14183:up Il1r1,17082:down                                                                                                                                                                                                                                                                                                                                                                                                                                                                                                                                                                                                                                                                                                                                                                                                                                                                                                                                                                                                                                                                                                                                                                                                                                                                                                                                                                                                                                                                                                                                                                                                                                                                                                                       |
| regulation of cell development                                     | GO:0060284 | 6.87E-07 | 1.60E-05 | Flrt2,399558:down Plxnd1,67784:up Ednrb,13618:up Sema7a,20361:down Ankrd1,107765:down Tnfrsf12a,27279:down Postn,50706:down Cx3cr1,13051:down Plk2,20620:down Trf,22041:up Cd24a,12484:down Wnt5a,22418:down Bmpr1a,12166:down Wisp1,22402:down Adipoq,11450:up Bmp4,12159:up lgf1,16000:up Crabp2,12904:down Ret,19713:up Tgfb2,21808:down Fam101b,76566:down Prl2c2,18811:up Efemp1,1216616:up Ptk7,71461:down Dpys3,22240:down Vdr,22337:down Cxl12,20315:up Vegfa,22339:down Serpine2,20720:up Tnf,21926:up Pparg,19016:up Fgfr1,14182:down Sfrp1,20377:up Has2,15117:down Tgfb3,21814:up Grem1,23892:up Col3a1,12825:down Sfrp2,20319:up                                                                                                                                                                                                                                                                                                                                                                                                                                                                                                                                                                                                                                                                                                                                                                                                                                                                                                                                                                                                                                                                                                                                                                                                                                                                                                                                                                                                                                                                                                                                  |
| cation homeostasis                                                 | GO:0055080 | 6.89E-07 | 1.60E-05 | Htr2b,15559:down Kng1,16644:up Adm,11535:up Ccl2,20296:up Ednrb,13618:up Ccl3,20302:up Mt2,17750:up Epas1,13819:up Vdr,22337:down Fam132b,227358:down Steap1,70358:down Htr2a,15558:down Slc40a1,53945:up Anpep,16790:up Glp1r,14652:down Fxyd1,56188:up Trf,22041:up Egfr,13649:down Cd24a,12484:down Hmox1,15368:up Cd4,12504:up Stc1,20855:up Tfrc,22042:up Bmp4,12159:up Tgfb2,21808:down Fam20a,208659:down Ptgir,19222:up Mt1,17748:up                                                                                                                                                                                                                                                                                                                                                                                                                                                                                                                                                                                                                                                                                                                                                                                                                                                                                                                                                                                                                                                                                                                                                                                                                                                                                                                                                                                                                                                                                                                                                                                                                                                                                                                                   |
| immune system development                                          | GO:0002520 | 6.99E-07 | 1.61E-05 | Fstl3,83554:down Clec2d,93694:up Tmem176b,65963:up Ly9,17085:up Epas1,13819:up Lyl1,17095:up Cd109,235505:down Trf,22041:up Cd24a,12484:down Wnt5a,22418:down Adipoq,11450:up Bmp4,12159:up Ret,19713:up Prp4,96875:down Tgfb2,21808:down Fgfr2,14183:up Clec4e,56619:up Kitl,17311:up Lrrc17,74511:down Inhba,16323:down Ccl3,20302:up Ctla2a,13024:down Vegfa,22339:down Slc40a1,53945:up Tnf,21926:up Pparg,19016:up Gas6,14456:up Tmem176a,66058:up Sfrp1,20377:up Tgfb3,21814:up Cd4,12504:up Tfrc,22042:up Ceacam1,26365:up Sfrp2,20319:up Tnfsf9,21950:up                                                                                                                                                                                                                                                                                                                                                                                                                                                                                                                                                                                                                                                                                                                                                                                                                                                                                                                                                                                                                                                                                                                                                                                                                                                                                                                                                                                                                                                                                                                                                                                                               |
| positive regulation of cardiac muscle tissue development           | GO:0055025 | 7.12E-07 | 1.64E-05 | Fgfr1,14182:down Ncam1,17967:down Bmpr1a,12166:down Wisp1,22402:down Grem1,23892:up lgf1,16000:up Bmp4,12159:up Fgfr2,14183:up                                                                                                                                                                                                                                                                                                                                                                                                                                                                                                                                                                                                                                                                                                                                                                                                                                                                                                                                                                                                                                                                                                                                                                                                                                                                                                                                                                                                                                                                                                                                                                                                                                                                                                                                                                                                                                                                                                                                                                                                                                                 |
| ion homeostasis                                                    | GO:0050801 | 7.19E-07 | 1.65E-05 | Htr2b,15559:down Kng1,16644:up Adm,11535:up Sfrp4,20379:up Ccl2,20296:up Ednrb,13618:up Ccl3,20302:up Mt2,17750:up Epas1,13819:up Vdr,22337:down Fam132b,227358:down Steap1,70358:down Htr2a,15558:down Slc40a1,53945:up Anpep,16790:up Glp1r,14652:down Fxyd1,56188:up Trf,22041:up Egfr,13649:down Cd24a,12484:down Hmox1,15368:up Cd4,12504:up Tfrc,22042:up Stc1,20855:up Bmp4,12159:up Tgfb2,21808:down Fam20a,208659:down Ptgir,19222:up Enpp1,18605:down Mt1,17748:up                                                                                                                                                                                                                                                                                                                                                                                                                                                                                                                                                                                                                                                                                                                                                                                                                                                                                                                                                                                                                                                                                                                                                                                                                                                                                                                                                                                                                                                                                                                                                                                                                                                                                                   |
| cellular response to stimulus                                      | GO:0051716 | 7.50E-07 | 1.71E-05 | Fstl3,83554:down lgfbp4,16010:up Adm,11535:up Flrt2,399558:down Plxnd1,67784:up Tfrc,21426:up Sfrp4,20379:up Gstt1,14871:up lgfbp3,16009:up lbsp,15891:up Plk2,20620:down Cd24a,12484:down Mme,17380:up Il1rn,16181:up Bmp4,12159:up Hpse,15442:up Ptgir,19222:up Fgfr2,14183:up Htr2b,15559:down Ccl6,20305:up Aspn,66695:down Mt2,17750:up Cxc6,80901:down Nabp1,109019:down Mmp2,17390:down Slc40a1,53945:up Egfr,13649:down Alpl,11647:up Tfrc,22042:up Ccl8,20307:up Gstm1,14862:up Rspo2,239405:up Mt1,17748:up Col5a2,12832:down Mrc1,17533:up Aldh1a2,19378:up Ccl2,20296:up Ednrb,13618:up Htra3,78558:down Tnfrsf12a,27279:down Uchl5,56207:up Clec4n,56620:up Dok2,13449:up Hvcn1,74096:up Ncam1,17967:down Ccl4,20303:up Chst11,58250:down Aldh1a3,56847:down Plpp3,67916:up Ccl9,20308:up Ptk7,71461:down Inhba,16323:down Crfl1,12931:down Plod2,26432:down Vegfa,22339:down Serpine2,20720:up Nxn,18230:down lgf2,16002:up Tnf,21926:up Col1a2,12843:down Fgfr1,14182:down Sulf1,240725:down Cd4,12504:up Col3a1,12825:down Enpp1,18605:down Hpgd,15446:up C3,12266:up Ankrd1,107765:down Cx3cr1,13051:down Cd109,235505:down Trf,22041:up Cxl14,57266:down Wnt5a,22418:down Mark1,226778:up Adipoq,11450:up lgf1,16000:up Crabp2,12904:down Cxl9,17329:up Tgfb2,21808:down F3,14066:up Clec4e,56619:up Cthrc1,68588:down Efemp1,1216616:up Saa3,20210:up Vdr,22337:down Pdia5,72599:down Fabp4,11770:up Cxl12,20315:up Htr2a,15558:down Smoc2,64074:down Gas6,14456:up Sfrp1,20377:up Tgfb3,21814:up C1qtnf3,81799:down Ceacam1,26365:up Sfrp2,20319:up Tnfrsf11b,18383:up Npnt,114249:up Ccl7,20306:up Figf,14205:up Pdgc,54635:down Ifit3,15959:up Epas1,13819:up Slc29a1,63959:up Sema7a,20361:down Postn,50706:down Akr1c18,105349:up Ccl12,20293:up Bmpr1a,12166:down Wisp1,22402:down Tnc,21923:down Ret,19713:up Sdf2l1,64136:up Ifit1,15957:up Creb3l1,26427:down Kitl,17311:up Il1r1,17082:down Hp,15439:up Rasl11a,68895:up Ccl3,20302:up Plat,18791:down Adamts12,239337:down Lrrc15,74488:down Pparg,19016:up Lmcd1,30937:up Glp1r,14652:down Tnfrsf23,79201:down Hmox1,15368:up Has2,15117:down Ptgs2,19225:down Grem1,23892:up Errfi1,74155:down |
| anatomical structure maturation                                    | GO:0071695 | 7.60E-07 | 1.73E-05 | Fam101b,76566:down Aldh1a2,19378:up Ptgs2,19225:down Grem1,23892:up lgf1,16000:up Lyl1,17095:up Ret,19713:up Tgfb2,21808:down Mmp2,17390:down                                                                                                                                                                                                                                                                                                                                                                                                                                                                                                                                                                                                                                                                                                                                                                                                                                                                                                                                                                                                                                                                                                                                                                                                                                                                                                                                                                                                                                                                                                                                                                                                                                                                                                                                                                                                                                                                                                                                                                                                                                  |
| negative regulation of cellular response to growth factor stimulus | GO:0090288 | 7.68E-07 | 1.74E-05 | Fstl3,83554:down Sfrp1,20377:up Sulf1,240725:down Wnt5a,22418:down Tgfb3,21814:up Aspn,66695:down Grem1,23892:up Chst11,58250:down Htra3,78558:down Sfrp2,20319:up Adamts12,239337:down Cd109,235505:down                                                                                                                                                                                                                                                                                                                                                                                                                                                                                                                                                                                                                                                                                                                                                                                                                                                                                                                                                                                                                                                                                                                                                                                                                                                                                                                                                                                                                                                                                                                                                                                                                                                                                                                                                                                                                                                                                                                                                                      |

|                                                      |            |          |          |                                                                                                                                                                                                                                                                                                                                                                                                                                                                                                                                                                                                                                                                                                                                                                                                                                                                                                                                                                      |
|------------------------------------------------------|------------|----------|----------|----------------------------------------------------------------------------------------------------------------------------------------------------------------------------------------------------------------------------------------------------------------------------------------------------------------------------------------------------------------------------------------------------------------------------------------------------------------------------------------------------------------------------------------------------------------------------------------------------------------------------------------------------------------------------------------------------------------------------------------------------------------------------------------------------------------------------------------------------------------------------------------------------------------------------------------------------------------------|
| positive regulation of catalytic activity            | GO:0043085 | 8.18E-07 | 1.85E-05 | Ccl7,20306:up Ccl2,20296:up Pdgfc,54635:down Trf,22041:up Cd24a,12484:down Wnt5a,22418:down Ccl12,20293:up Il1rn,16181:up Ccl4,20303:up Adipoq,11450:up Bmp4,12159:up Igf1,16000:up Tgfb2,21808:down Fgfr2,14183:up F3,14066:up Kitl,17311:up Htr2b,15559:down Ccl9,20308:up Ccl6,20305:up Ccl3,20302:up Vdr,22337:down Vegfa,22339:down Htr2a,15558:down Igf2,16002:up Pparg,16790:up Gas6,14456:up Tnf,21926:up Egfr,13649:down Fgfr1,14182:down Cd4,12504:up Grem1,23892:up Serinc2,230779:down Ccl8,20307:up Ceacam1,26365:up Sfrp2,20319:up Npnt,114249:up                                                                                                                                                                                                                                                                                                                                                                                                      |
| positive regulation of MAP kinase activity           | GO:0043406 | 8.46E-07 | 1.90E-05 | Htr2b,15559:down Tnf,21926:up Trf,22041:up Fgfr1,14182:down Egfr,13649:down Cd24a,12484:down Wnt5a,22418:down Pdgfc,54635:down Il1rn,16181:up Igf1,16000:up Ceacam1,26365:up Vegfa,22339:down Htr2a,15558:down Kitl,17311:up                                                                                                                                                                                                                                                                                                                                                                                                                                                                                                                                                                                                                                                                                                                                         |
| trabecula morphogenesis                              | GO:0061383 | 8.62E-07 | 1.93E-05 | Sfrp1,20377:up Bmpr1a,12166:down Tgfb3,21814:up Grem1,23892:up Tgfb2,21808:down Vegfa,22339:down Mmp2,17390:down Slc40a1,53945:up                                                                                                                                                                                                                                                                                                                                                                                                                                                                                                                                                                                                                                                                                                                                                                                                                                    |
| chemical homeostasis                                 | GO:0048878 | 9.04E-07 | 2.02E-05 | Adm,11535:up Sfrp4,20379:up Ccl2,20296:up Ednrb,13618:up Epas1,13819:up Steap1,70358:down Trf,22041:up Cd24a,12484:down Stc1,20855:up Adipoq,11450:up Bmp4,12159:up Igf1,16000:up Tgfb2,21808:down Ptgir,19222:up Kng1,16644:up Htr2b,15559:down Mt2,17750:up Ccl3,20302:up Vdr,22337:down Fam132b,227358:down Vegfa,22339:down Htr2a,15558:down Anpep,16790:up Slc40a1,53945:up Pparg,19016:up Gas6,14456:up Fxyd1,56188:up Glp1r,14652:down Egfr,13649:down Lpl,16956:up Hmox1,15368:up C1qtnf3,81799:down Cd4,12504:up Tfrc,22042:up Fam20a,208659:down Enpp1,18605:down Mt1,17748:up                                                                                                                                                                                                                                                                                                                                                                             |
| death                                                | GO:0016265 | 1.03E-06 | 2.26E-05 | Adm,11535:up Sfrp4,20379:up Aldh1a2,19378:up Ednrb,13618:up Ankrd1,107765:down Tnfrsf12a,27279:down Cx3cr1,13051:down Igf1,16000:up Plk2,20620:down Akr1c18,105349:up Cd24a,12484:down Ncam1,17967:down Wnt5a,22418:down Ccl12,20293:up Wisp1,22402:down Il1rn,16181:up Adipoq,11450:up Bmp4,12159:up Igf1,16000:up Chst11,58250:down Tgfb2,21808:down Pdxk,216134:up Sdf2l1,64136:up Aldh1a3,56847:down Creb3l1,26427:down Fgfr2,14183:up F3,14066:up Kitl,17311:up Htr2b,15559:down Hsp15439:up Dram1,71712:up Inhba,16323:down Ccl3,20302:up Vdr,22337:down Crif1,12931:down Cxcl12,20315:up Vegfa,22339:down Htr2a,15558:down Mmp2,17390:down Slc40a1,53945:up Pparg,19016:up Gas6,14456:up Tnf,21926:up Glp1r,14652:down Tnfrsf23,79201:down Fgfr1,14182:down Egfr,13649:down Hmox1,15368:up Sfrp1,20377:up Sulf1,240725:down Tgfb3,21814:up Ptgs2,19225:down Grem1,23892:up Ceacam1,26365:up Sfrp2,20319:up Serpina3g,20715:up Tnfrsf11b,18383:up Mt1,17748:up |
| cell death                                           | GO:0008219 | 1.03E-06 | 2.26E-05 | Adm,11535:up Sfrp4,20379:up Aldh1a2,19378:up Ednrb,13618:up Ankrd1,107765:down Tnfrsf12a,27279:down Cx3cr1,13051:down Igf1,16000:up Plk2,20620:down Akr1c18,105349:up Cd24a,12484:down Ncam1,17967:down Wnt5a,22418:down Ccl12,20293:up Wisp1,22402:down Il1rn,16181:up Adipoq,11450:up Bmp4,12159:up Igf1,16000:up Chst11,58250:down Tgfb2,21808:down Pdxk,216134:up Sdf2l1,64136:up Aldh1a3,56847:down Creb3l1,26427:down Fgfr2,14183:up F3,14066:up Kitl,17311:up Htr2b,15559:down Hsp15439:up Dram1,71712:up Inhba,16323:down Ccl3,20302:up Vdr,22337:down Crif1,12931:down Cxcl12,20315:up Vegfa,22339:down Htr2a,15558:down Mmp2,17390:down Slc40a1,53945:up Pparg,19016:up Gas6,14456:up Tnf,21926:up Glp1r,14652:down Tnfrsf23,79201:down Fgfr1,14182:down Egfr,13649:down Hmox1,15368:up Sfrp1,20377:up Sulf1,240725:down Tgfb3,21814:up Ptgs2,19225:down Grem1,23892:up Ceacam1,26365:up Sfrp2,20319:up Serpina3g,20715:up Tnfrsf11b,18383:up Mt1,17748:up |
| regulation of morphogenesis of a branching structure | GO:0060688 | 1.03E-06 | 2.26E-05 | Tnf,21926:up Fgfr1,14182:down Sfrp1,20377:up Sulf1,240725:down Wnt5a,22418:down Grem1,23892:up Bmp4,12159:up Vegfa,22339:down Fgfr2,14183:up                                                                                                                                                                                                                                                                                                                                                                                                                                                                                                                                                                                                                                                                                                                                                                                                                         |
| response to metal ion                                | GO:0010038 | 1.11E-06 | 2.43E-05 | Pparg,19016:up Loxl2,94352:down Akr1c18,105349:up Hvcn1,74096:up Trf,22041:up Egfr,13649:down Ncam1,17967:down Hmox1,15368:up Tfrc,22042:up Mt2,17750:up Sord,20322:up Fabp4,11770:up Gatm,67092:down Slc40a1,53945:up Mt1,17748:up                                                                                                                                                                                                                                                                                                                                                                                                                                                                                                                                                                                                                                                                                                                                  |
| regulation of secretion by cell                      | GO:1903530 | 1.11E-06 | 2.43E-05 | Htr2b,15559:down Inhba,16323:down Ccl3,20302:up Mmp13,17386:up Ankrd1,107765:down Clec4n,56620:up Cxcl12,20315:up Postn,50706:down Htr2a,15558:down Gas6,14456:up Pparg,19016:up Tnf,21926:up Glp1r,14652:down Fgfr1,14182:down Egfr,13649:down Ncam1,17967:down Hmox1,15368:up Lpl,16956:up Sfrp1,20377:up C1qtnf3,81799:down Wnt5a,22418:down Il1rn,16181:up Sncg,20618:up Maob,109731:up Adipoq,11450:up Igf1,16000:up Ceacam1,26365:up Tgfb2,21808:down Il1rl1,17082:down Clec4e,56619:up                                                                                                                                                                                                                                                                                                                                                                                                                                                                        |
| epithelial cell migration                            | GO:0010631 | 1.14E-06 | 2.48E-05 | Pr12c2,18811:up Plxnd1,67784:up Srxp2,68792:down Vegfa,22339:down Loxl2,94352:down Fgfr1,14182:down Has2,15117:down Tgfb3,21814:up Wnt5a,22418:down Stc1,20855:up Ptgs2,19225:down Grem1,23892:up Bmp4,12159:up Ceacam1,26365:up Tgfb2,21808:down Ppp3,67916:up                                                                                                                                                                                                                                                                                                                                                                                                                                                                                                                                                                                                                                                                                                      |
| developmental growth involved in morphogenesis       | GO:0060560 | 1.18E-06 | 2.55E-05 | Plxnd1,67784:up Ptk7,71461:down Bnc2,242509:down Mmp13,17386:up Sema7a,20361:down Tnfrsf12a,27279:down Cxcl12,20315:up Postn,50706:down Vegfa,22339:down Sfrp1,20377:up Wnt5a,22418:down Stc1,20855:up Bmp4,12159:up Sfrp2,20319:up Crabp2,12904:down Tnc,21923:down Fgfr2,14183:up                                                                                                                                                                                                                                                                                                                                                                                                                                                                                                                                                                                                                                                                                  |
| epithelium migration                                 | GO:0090132 | 1.30E-06 | 2.80E-05 | Pr12c2,18811:up Plxnd1,67784:up Srxp2,68792:down Vegfa,22339:down Loxl2,94352:down Fgfr1,14182:down Has2,15117:down Tgfb3,21814:up Wnt5a,22418:down Stc1,20855:up Ptgs2,19225:down Grem1,23892:up Bmp4,12159:up Ceacam1,26365:up Tgfb2,21808:down Ppp3,67916:up                                                                                                                                                                                                                                                                                                                                                                                                                                                                                                                                                                                                                                                                                                      |
| positive regulation of growth                        | GO:0045927 | 1.40E-06 | 3.01E-05 | C3,12266:up Sema7a,20361:down Tnfrsf12a,27279:down Cxcl12,20315:up Vegfa,22339:down Igf2,16002:up Egfr,13649:down Fgfr1,14182:down Sfrp1,20377:up Ncam1,17967:down Bmpr1a,12166:down Wisp1,22402:down Igf1,16000:up Sfrp2,20319:up Crabp2,12904:down Tgfb2,21808:down Fgfr2,14183:up                                                                                                                                                                                                                                                                                                                                                                                                                                                                                                                                                                                                                                                                                 |
| endothelial cell migration                           | GO:0043542 | 1.41E-06 | 3.02E-05 | Pr12c2,18811:up Loxl2,94352:down Fgfr1,14182:down Plxnd1,67784:up Wnt5a,22418:down Ptgs2,19225:down Stc1,20855:up Grem1,23892:up Bmp4,12159:up Ceacam1,26365:up Srxp2,68792:down Vegfa,22339:down Ppp3,67916:up                                                                                                                                                                                                                                                                                                                                                                                                                                                                                                                                                                                                                                                                                                                                                      |
| negative regulation of tissue remodeling             | GO:0034104 | 1.43E-06 | 3.04E-05 | Ceacam1,26365:up Cd24a,12484:down Sfrp1,20377:up Vegfa,22339:down Tnfrsf11b,18383:up Grem1,23892:up                                                                                                                                                                                                                                                                                                                                                                                                                                                                                                                                                                                                                                                                                                                                                                                                                                                                  |
| tissue migration                                     | GO:0090130 | 1.47E-06 | 3.12E-05 | Pr12c2,18811:up Plxnd1,67784:up Srxp2,68792:down Vegfa,22339:down Loxl2,94352:down Fgfr1,14182:down Has2,15117:down Tgfb3,21814:up Wnt5a,22418:down Stc1,20855:up Ptgs2,19225:down Grem1,23892:up Bmp4,12159:up Ceacam1,26365:up Tgfb2,21808:down Ppp3,67916:up                                                                                                                                                                                                                                                                                                                                                                                                                                                                                                                                                                                                                                                                                                      |
| apoptotic process                                    | GO:0006915 | 1.54E-06 | 3.26E-05 | Adm,11535:up Sfrp4,20379:up Aldh1a2,19378:up Ednrb,13618:up Ankrd1,107765:down Tnfrsf12a,27279:down Cx3cr1,13051:down Igf1,16000:up Plk2,20620:down Akr1c18,105349:up Cd24a,12484:down Wnt5a,22418:down Ccl12,20293:up Il1rn,16181:up Adipoq,11450:up Bmp4,12159:up Igf1,16000:up Chst11,58250:down Tgfb2,21808:down Pdxk,216134:up Sdf2l1,64136:up Aldh1a3,56847:down Creb3l1,26427:down Fgfr2,14183:up F3,14066:up Kitl,17311:up Htr2b,15559:down Dram1,71712:up Inhba,16323:down Ccl3,20302:up Vdr,22337:down Crif1,12931:down Cxcl12,20315:up Vegfa,22339:down Mmp2,17390:down Slc40a1,53945:up Pparg,19016:up Gas6,14456:up Tnf,21926:up Glp1r,14652:down Tnfrsf23,79201:down Fgfr1,14182:down Egfr,13649:down Hmox1,15368:up Sfrp1,20377:up Sulf1,240725:down Tgfb3,21814:up Ptgs2,19225:down Grem1,23892:up Ceacam1,26365:up Sfrp2,20319:up Serpina3g,20715:up Tnfrsf11b,18383:up Mt1,17748:up                                                                |

|                                      |            |          |          |                                                                                                                                                                                                                                                                                                                                                                                                                                                                                                                                                                                                                                                                                                                                                                                                                                                                                                                                                                                                                                                                                                                                                                                                                                                                                                                                                                                                                                                                                                                                                                                                                                                                                                                                                                                                                                                                                                                                                                                                                                                                 |
|--------------------------------------|------------|----------|----------|-----------------------------------------------------------------------------------------------------------------------------------------------------------------------------------------------------------------------------------------------------------------------------------------------------------------------------------------------------------------------------------------------------------------------------------------------------------------------------------------------------------------------------------------------------------------------------------------------------------------------------------------------------------------------------------------------------------------------------------------------------------------------------------------------------------------------------------------------------------------------------------------------------------------------------------------------------------------------------------------------------------------------------------------------------------------------------------------------------------------------------------------------------------------------------------------------------------------------------------------------------------------------------------------------------------------------------------------------------------------------------------------------------------------------------------------------------------------------------------------------------------------------------------------------------------------------------------------------------------------------------------------------------------------------------------------------------------------------------------------------------------------------------------------------------------------------------------------------------------------------------------------------------------------------------------------------------------------------------------------------------------------------------------------------------------------|
| lung development                     | GO:0030324 | 1.56E-06 | 3.29E-05 | Tnf,21926:up Fgfr1,14182:down Ptk7,71461:down Wnt5a,22418:down Bmpr1a,12166:down Aldh1a2,19378:up Mgp,17313:up Igf1,16000:up Epas1,13819:up Bmp4,12159:up Tnc,21923:down Vegfa,22339:down Rspo2,239405:up Errfi1,74155:down Fgfr2,14183:up                                                                                                                                                                                                                                                                                                                                                                                                                                                                                                                                                                                                                                                                                                                                                                                                                                                                                                                                                                                                                                                                                                                                                                                                                                                                                                                                                                                                                                                                                                                                                                                                                                                                                                                                                                                                                      |
| respiratory system development       | GO:0060541 | 1.66E-06 | 3.49E-05 | Ptk7,71461:down Aldh1a2,19378:up Mgp,17313:up Epas1,13819:up Vegfa,22339:down Tnf,21926:up Fgfr1,14182:down Bmpr1a,12166:down Wnt5a,22418:down Bmp4,12159:up Igf1,16000:up Tnc,21923:down Rspo2,239405:up Aldh1a3,56847:down Fgfr2,14183:up Errfi1,74155:down                                                                                                                                                                                                                                                                                                                                                                                                                                                                                                                                                                                                                                                                                                                                                                                                                                                                                                                                                                                                                                                                                                                                                                                                                                                                                                                                                                                                                                                                                                                                                                                                                                                                                                                                                                                                   |
| axis elongation                      | GO:0003401 | 1.67E-06 | 3.49E-05 | Sfrp2,20319:up Tnc,21923:down Sfrp1,20377:up Ptk7,71461:down Wnt5a,22418:down Fgfr2,14183:up Bmp4,12159:up                                                                                                                                                                                                                                                                                                                                                                                                                                                                                                                                                                                                                                                                                                                                                                                                                                                                                                                                                                                                                                                                                                                                                                                                                                                                                                                                                                                                                                                                                                                                                                                                                                                                                                                                                                                                                                                                                                                                                      |
| regulation of cell growth            | GO:0001558 | 1.68E-06 | 3.50E-05 | Igfbp4,16010:up Plxnd1,67784:up Inhba,16323:down Sema7a,20361:down Htra3,78558:down Tnfrsf12a,27279:down Cxcl12,20315:up Vegfa,22339:down Igfbp3,16009:up Serpine2,20720:up Pparg,19016:up Egfr,13649:down Sfrp1,20377:up Wnt5a,22418:down Wisp1,22402:down Grem1,23892:up Igf1,16000:up Sfrp2,20319:up Crabp2,12904:down Tgfb2,21808:down Enpp1,18605:down                                                                                                                                                                                                                                                                                                                                                                                                                                                                                                                                                                                                                                                                                                                                                                                                                                                                                                                                                                                                                                                                                                                                                                                                                                                                                                                                                                                                                                                                                                                                                                                                                                                                                                     |
| regulation of bone remodeling        | GO:0046850 | 1.76E-06 | 3.65E-05 | Trf,22041:up Egfr,13649:down Sfrp1,20377:up Tfrc,22042:up Grem1,23892:up Ceacam1,26365:up Vegfa,22339:down Tnfrsf11b,18383:up                                                                                                                                                                                                                                                                                                                                                                                                                                                                                                                                                                                                                                                                                                                                                                                                                                                                                                                                                                                                                                                                                                                                                                                                                                                                                                                                                                                                                                                                                                                                                                                                                                                                                                                                                                                                                                                                                                                                   |
| gland development                    | GO:0048732 | 1.77E-06 | 3.67E-05 | Hp,15439:up Plxnd1,67784:up Vdr,22337:down Vegfa,22339:down Mmp2,17390:down Serpine2,20720:up Igf2,16002:up Cdo1,12583:up Tnf,21926:up Egfr,13649:down Fgfr1,14182:down Hmox1,15368:up Sfrp1,20377:up Sulf1,240725:down Wnt5a,22418:down Tgfb3,21814:up Bmpr1a,12166:down Bmp4,12159:up Igf1,16000:up Ceacam1,26365:up Tnc,21923:down Fgfr2,14183:up                                                                                                                                                                                                                                                                                                                                                                                                                                                                                                                                                                                                                                                                                                                                                                                                                                                                                                                                                                                                                                                                                                                                                                                                                                                                                                                                                                                                                                                                                                                                                                                                                                                                                                            |
| stem cell development                | GO:0048864 | 1.81E-06 | 3.73E-05 | Fam101b,76566:down Htr2b,15559:down Aldh1a2,19378:up Ednrb,13618:up Sema7a,20361:down Loxl2,94352:down Loxl3,16950:down Fgfr1,14182:down Sfrp1,20377:up Has2,15117:down Wnt5a,22418:down Tgfb3,21814:up Bmpr1a,12166:down Grem1,23892:up Sfrp2,20319:up Ret,19713:up Tgfb2,21808:down Fgfr2,14183:up Kitl,17311:up                                                                                                                                                                                                                                                                                                                                                                                                                                                                                                                                                                                                                                                                                                                                                                                                                                                                                                                                                                                                                                                                                                                                                                                                                                                                                                                                                                                                                                                                                                                                                                                                                                                                                                                                              |
| localization                         | GO:0051179 | 1.82E-06 | 3.75E-05 | Adm,11535:up Flrt2,399558:down Plxnd1,67784:up Sfrp4,20379:up C3,12266:up Ankrd1,107765:down Cx3cr1,13051:down Igfbp3,16009:up Loxl2,94352:down Trf,22041:up Cxcl14,57266:down Cd24a,12484:down Ceacam10,26366:up Wnt5a,22418:down Mark1,226778:up Stc1,20855:up Ili1r,16181:up Maob,109731:up Igf1,16000:up Adipoq,11450:up Bmp4,12159:up Crabp2,12904:down Mcoln2,68279:up Cxcl9,17329:up Tgfb2,21808:down F3,14066:up Fgfr2,14183:up Clec4e,56619:up Cthrc1,68588:down Htr2b,15559:down Mfsd12,73822:up Pr1c2,18811:up Efemp1,216616:up Ccl6,20305:up Dpysl3,22240:down Saa3,20210:up Vdr,22337:down Fabp4,11770:up Fam132b,227358:down Cxcl12,20315:up Htr2a,15558:down Mmp2,17390:down Slc16a4,229699:down Slc40a1,53945:up Gas6,14456:up Egfr,13649:down Sec23a,20334:down Sfrp1,20377:up C1qtnf3,81799:down Tgfb3,21814:up Tfrc,22042:up Snca,20618:up Fxyd2,11936:up Serinc2,230779:down Ceacam1,26365:up Ccl8,20307:up Sfrp2,20319:up Npnt,114249:up Syt13,80976:up S100a1,20193:up Ice1,218333:down Mrc1,17533:up Ccl2,20296:up Ccl7,20306:up Pdgcf,54635:down Ednrb,13618:up Figf,14205:up Mmp13,17386:up Sema7a,20361:down Slc29a1,63959:up Tnfrsf12a,27279:down Sord,20322:up Gpm6b,14758:up Clec4n,56620:up Steap1,70358:down Postn,50706:down Cdo1,12583:up Akr1c18,105349:up Hvcn1,74096:up Ptx3,19288:up Fabp5,16592:up Ncam1,17967:down Bmpr1a,12166:down Ccl12,20293:up Ccl4,20303:up Chst11,58250:down Ank,11732:down Ret,19713:up Ppp3,67916:up Creb3l1,26427:down Mrc2,17534:down Ili1r1,17082:down Kitl,17311:up Lama2,16773:down Ccl9,20308:up Ptk7,71461:down Inhba,16323:down Plat,18791:down Ccl3,20302:up Srxp2,68792:down Vegfa,22339:down Serpine2,20720:up Adamts12,239337:down Lrrc15,74488:down Anpep,16790:up Kdelr3,105785:down Pparg,19016:up Tnf,21926:up Glp1r,14652:down Fxyd1,56188:up Fgfr1,14182:down Has2,15117:down Lpl,16956:up Hmox1,15368:up Sulf1,240725:down Cd4,12504:up Ptgs2,19225:down Kcnj15,16516:down Grem1,23892:up Col3a1,12825:down Col5a1,12831:down Mcoln3,171166:up Emb,13723:up Enpp1,18605:down |
| respiratory tube development         | GO:0030323 | 1.90E-06 | 3.90E-05 | Tnf,21926:up Fgfr1,14182:down Ptk7,71461:down Wnt5a,22418:down Bmpr1a,12166:down Aldh1a2,19378:up Mgp,17313:up Igf1,16000:up Epas1,13819:up Bmp4,12159:up Tnc,21923:down Vegfa,22339:down Rspo2,239405:up Errfi1,74155:down Fgfr2,14183:up                                                                                                                                                                                                                                                                                                                                                                                                                                                                                                                                                                                                                                                                                                                                                                                                                                                                                                                                                                                                                                                                                                                                                                                                                                                                                                                                                                                                                                                                                                                                                                                                                                                                                                                                                                                                                      |
| bone remodeling                      | GO:0046849 | 1.92E-06 | 3.91E-05 | Cthrc1,68588:down Trf,22041:up Egfr,13649:down Sfrp1,20377:up Tfrc,22042:up Grem1,23892:up Ceacam1,26365:up Vegfa,22339:down Tnfrsf11b,18383:up Enpp1,18605:down                                                                                                                                                                                                                                                                                                                                                                                                                                                                                                                                                                                                                                                                                                                                                                                                                                                                                                                                                                                                                                                                                                                                                                                                                                                                                                                                                                                                                                                                                                                                                                                                                                                                                                                                                                                                                                                                                                |
| heart morphogenesis                  | GO:0003007 | 2.00E-06 | 4.07E-05 | Htr2b,15559:down Flrt2,399558:down Plxnd1,67784:up Aldh1a2,19378:up Ankrd1,107765:down Vegfa,22339:down Col11a1,12814:down Has2,15117:down Tgfb3,21814:up Bmpr1a,12166:down Wnt5a,22418:down Bmp4,12159:up Sfrp2,20319:up Col5a1,12831:down Tgfb2,21808:down Fgfr2,14183:up                                                                                                                                                                                                                                                                                                                                                                                                                                                                                                                                                                                                                                                                                                                                                                                                                                                                                                                                                                                                                                                                                                                                                                                                                                                                                                                                                                                                                                                                                                                                                                                                                                                                                                                                                                                     |
| single organism cell adhesion        | GO:0098602 | 2.02E-06 | 4.09E-05 | Fstl3,83554:down Ly9,17085:up Ccl2,20296:up Ctla2a,13024:down Srxp2,68792:down Cxcl12,20315:up Postn,50706:down Vegfa,22339:down Serpine2,20720:up Igf2,16002:up Tnf,21926:up Egfr,13649:down Cd24a,12484:down Ncam1,17967:down Has2,15117:down Sfrp1,20377:up Wnt5a,22418:down Cd4,12504:up Ili1r,16181:up Tfrc,22042:up Adipoq,11450:up Bmp4,12159:up Igf1,16000:up Ceacam1,26365:up Ret,19713:up Tgfb2,21808:down Cdsn,386463:up Npnt,114249:up Ppp3,67916:up Clec4e,56619:up Tnfsf9,21950:up                                                                                                                                                                                                                                                                                                                                                                                                                                                                                                                                                                                                                                                                                                                                                                                                                                                                                                                                                                                                                                                                                                                                                                                                                                                                                                                                                                                                                                                                                                                                                                |
| response to drug                     | GO:0042493 | 2.03E-06 | 4.11E-05 | Htr2b,15559:down Gas6,14456:up Ncam1,17967:down Sfrp1,20377:up Inhba,16323:down Tfrc,22042:up Ccl4,20303:up Adipoq,11450:up Ankrd1,107765:down Gstm1,14862:up Sfrp2,20319:up Tgfb2,21808:down Htr2a,15558:down Mmp2,17390:down Igf2,16002:up                                                                                                                                                                                                                                                                                                                                                                                                                                                                                                                                                                                                                                                                                                                                                                                                                                                                                                                                                                                                                                                                                                                                                                                                                                                                                                                                                                                                                                                                                                                                                                                                                                                                                                                                                                                                                    |
| regulation of gastrulation           | GO:0010470 | 2.07E-06 | 4.15E-05 | Col5a2,12832:down Sfrp2,20319:up Fgfr1,14182:down Col5a1,12831:down Bmpr1a,12166:down Ili1r,16181:up Adipoq,11450:up                                                                                                                                                                                                                                                                                                                                                                                                                                                                                                                                                                                                                                                                                                                                                                                                                                                                                                                                                                                                                                                                                                                                                                                                                                                                                                                                                                                                                                                                                                                                                                                                                                                                                                                                                                                                                                                                                                                                            |
| dopaminergic neuron differentiation  | GO:0071542 | 2.07E-06 | 4.15E-05 | Sfrp2,20319:up Sfrp1,20377:up Cxcl12,20315:up Wnt5a,22418:down Vegfa,22339:down Rspo2,239405:up Figf,14205:up                                                                                                                                                                                                                                                                                                                                                                                                                                                                                                                                                                                                                                                                                                                                                                                                                                                                                                                                                                                                                                                                                                                                                                                                                                                                                                                                                                                                                                                                                                                                                                                                                                                                                                                                                                                                                                                                                                                                                   |
| epithelial to mesenchymal transition | GO:0001837 | 2.07E-06 | 4.15E-05 | Fam101b,76566:down Loxl2,94352:down Loxl3,16950:down Has2,15117:down Sfrp1,20377:up Wnt5a,22418:down Tgfb3,21814:up Grem1,23892:up Sfrp2,20319:up Tgfb2,21808:down Fgfr2,14183:up                                                                                                                                                                                                                                                                                                                                                                                                                                                                                                                                                                                                                                                                                                                                                                                                                                                                                                                                                                                                                                                                                                                                                                                                                                                                                                                                                                                                                                                                                                                                                                                                                                                                                                                                                                                                                                                                               |

|                                         |            |          |          |                                                                                                                                                                                                                                                                                                                                                                                                                                                                                                                                                                                                                                                                                                                                                                                                                                                                                                                                                                                                                                                                                                                                                                                                                                                                                                                                                                                                                                                                                                                                                                                                                                                                                                                                                                                                                                                                                                                                                                                     |
|-----------------------------------------|------------|----------|----------|-------------------------------------------------------------------------------------------------------------------------------------------------------------------------------------------------------------------------------------------------------------------------------------------------------------------------------------------------------------------------------------------------------------------------------------------------------------------------------------------------------------------------------------------------------------------------------------------------------------------------------------------------------------------------------------------------------------------------------------------------------------------------------------------------------------------------------------------------------------------------------------------------------------------------------------------------------------------------------------------------------------------------------------------------------------------------------------------------------------------------------------------------------------------------------------------------------------------------------------------------------------------------------------------------------------------------------------------------------------------------------------------------------------------------------------------------------------------------------------------------------------------------------------------------------------------------------------------------------------------------------------------------------------------------------------------------------------------------------------------------------------------------------------------------------------------------------------------------------------------------------------------------------------------------------------------------------------------------------------|
| signal transduction                     | GO:0007165 | 2.14E-06 | 4.26E-05 | Fstl3,83554:down lgfbp4,16010:up Adm,11535:up Flrt2,399558:down Hpgd,15446:up Plxnd1,67784:up Sfrp4,20379:up C3,12266:up Ankrd1,107765:down Cx3cr1,13051:down lgfbp3,16009:up Cd109,235505:down Plk2,20620:down Trf,22041:up Cd24a,12484:down Wnt5a,22418:down Mark1,226778:up Il1rn,16181:up Adipoq,11450:up Bmp4,12159:up lgf1,16000:up Crabp2,12904:down Cxc9,17329:up Tgfb2,21808:down Hpse,15442:up Ptgir,19222:up F3,14066:up Fgfr2,14183:up Clec4e,56619:up Cthrc1,68588:down Htr2b,15559:down Efemp1,216616:up Ccl6,20305:up Aspn,66695:down Mt2,17750:up Saa3,20210:up Vdr,22337:down Cxc6,80901:down Cxl12,20315:up Htr2a,15558:down Smoc2,64074:down Gas6,14456:up Egfr,13649:down Sfrp1,20377:up C1qtnf3,81799:down Tgfb3,21814:up Ceacam1,26365:up Ccl8,20307:up Sfrp2,20319:up Rspo2,239405:up Npnt,114249:up Tnfrsf11b,18383:up Mt1,17748:up Aldh1a2,19378:up Ccl2,20296:up Ccl7,20306:up Pdgfc,54635:down Ednrb,13618:up Figf,14205:up Sema7a,20361:down Slc29a1,63959:up Htra3,78558:down Tnfrsf12a,27279:down Clec4n,56620:up Postn,50706:down Dok2,13449:up Akr1c18,105349:up Ncam1,17967:down Ccl12,20293:up Bmpr1a,12166:down Wisp1,22402:down Ccl4,20303:up Chst11,58250:down Ret,19713:up Sdf2l1,64136:up Aldh1a3,56847:down Ppp3,67916:up Creb3l1,26427:down Il1r1,17082:down Kitl,17311:up Hp,15439:up Ccl9,20308:up Ptk7,71461:down Inhba,16323:down Ras11a,68895:up Plat,18791:down Ccl3,20302:up Crfl1,12931:down Vegfa,22339:down Serpine2,20720:up Adamts12,239337:down Lrrc15,74488:down Nxn,18230:down lgf2,16002:up Pparg,19016:up Tnfrsf2,21926:up Glp1r,14652:down Col1a2,12843:down Lmcd1,30937:up Tnfrsf23,79201:down Fgfr1,14182:down Hmox1,15368:up Sulf1,240725:down Cd4,12504:up Ptgs2,19225:down Grem1,23892:up Col3a1,12825:down Errfi1,74155:down Enpp1,18605:down                                                                                                                                                                      |
| positive regulation of defense response | GO:0031349 | 2.22E-06 | 4.41E-05 | Ccl9,20308:up Ccl6,20305:up Ccl7,20306:up Ccl2,20296:up C3,12266:up Ccl3,20302:up Fabp4,11770:up Mmp2,17390:down Tnf,21926:up Cd24a,12484:down Egfr,13649:down Wnt5a,22418:down Ccl12,20293:up Ptgs2,19225:down Ccl4,20303:up Ccl8,20307:up Il1r1,17082:down                                                                                                                                                                                                                                                                                                                                                                                                                                                                                                                                                                                                                                                                                                                                                                                                                                                                                                                                                                                                                                                                                                                                                                                                                                                                                                                                                                                                                                                                                                                                                                                                                                                                                                                        |
| cell communication                      | GO:0007154 | 2.23E-06 | 4.43E-05 | Fstl3,83554:down lgfbp4,16010:up Adm,11535:up Flrt2,399558:down Hpgd,15446:up Plxnd1,67784:up Sfrp4,20379:up C3,12266:up Enpp5,83965:up Ankrd1,107765:down Cx3cr1,13051:down lgfbp3,16009:up Cd109,235505:down Plk2,20620:down Trf,22041:up Cxl14,57266:down Cd24a,12484:down Wnt5a,22418:down Mark1,226778:up Il1rn,16181:up lgf1,16000:up Adipoq,11450:up Bmp4,12159:up Crabp2,12904:down Cxc9,17329:up Tgfb2,21808:down Hpse,15442:up Ptgir,19222:up F3,14066:up Fgfr2,14183:up Clec4e,56619:up Cthrc1,68588:down Htr2b,15559:down Efemp1,216616:up Ccl6,20305:up Gjb5,14622:down Aspn,66695:down Mt2,17750:up Saa3,20210:up Vdr,22337:down Cxc6,80901:down Cxl12,20315:up Htr2a,15558:down Smoc2,64074:down Gas6,14456:up Egfr,13649:down Sfrp1,20377:up C1qtnf3,81799:down Tgfb3,21814:up Tfrc,22042:up Sncg,20618:up Ceacam1,26365:up Ccl8,20307:up Sfrp2,20319:up Rspo2,239405:up Npnt,114249:up Tnfrsf11b,18383:up Sy13,80976:up Mt1,17748:up Aldh1a2,19378:up Ccl2,20296:up Ccl7,20306:up Pdgfc,54635:down Ednrb,13618:up Figf,14205:up Sema7a,20361:down Slc29a1,63959:up Htra3,78558:down Tnfrsf12a,27279:down Gpm6b,14758:up Clec4n,56620:up Postn,50706:down Dok2,13449:up Akr1c18,105349:up Ncam1,17967:down Bmpr1a,12166:down Ccl12,20293:up Wisp1,22402:down Ccl4,20303:up Chst11,58250:down Tnc,21923:down Ret,19713:up Sdf2l1,64136:up Aldh1a3,56847:down Ppp3,67916:up Creb3l1,26427:down Il1r1,17082:down Kitl,17311:up Lama2,16773:down Hp,15439:up Ccl9,20308:up Ptk7,71461:down Inhba,16323:down Ras11a,68895:up Plat,18791:down Ccl3,20302:up Crfl1,12931:down Pld2,26432:down Vegfa,22339:down Serpine2,20720:up Adamts12,239337:down Lrrc15,74488:down Nxn,18230:down lgf2,16002:up Pparg,19016:up Tnf,21926:up Glp1r,14652:down Col1a2,12843:down Lmcd1,30937:up Tnfrsf23,79201:down Fgfr1,14182:down Hmox1,15368:up Sulf1,240725:down Cd4,12504:up Ptgs2,19225:down Grem1,23892:up Col3a1,12825:down Errfi1,74155:down Enpp1,18605:down Tnfsf9,21950:up |
| cellular metal ion homeostasis          | GO:0006875 | 2.41E-06 | 4.76E-05 | Htr2b,15559:down Kng1,16644:up Adm,11535:up Ccl2,20296:up Ednrb,13618:up Ccl3,20302:up Mt2,17750:up Vdr,22337:down Fam132b,227358:down Htr2a,15558:down Slc40a1,53945:up Glp1r,14652:down Trf,22041:up Fxyd1,56188:up Cd24a,12484:down Hmox1,15368:up Cd4,12504:up Stc1,20855:up Tfrc,22042:up Bmp4,12159:up Tgfb2,21808:down Ptgir,19222:up Mt1,17748:up                                                                                                                                                                                                                                                                                                                                                                                                                                                                                                                                                                                                                                                                                                                                                                                                                                                                                                                                                                                                                                                                                                                                                                                                                                                                                                                                                                                                                                                                                                                                                                                                                           |
| single organism signaling               | GO:0044700 | 2.41E-06 | 4.76E-05 | Fstl3,83554:down lgfbp4,16010:up Adm,11535:up Flrt2,399558:down Hpgd,15446:up Plxnd1,67784:up Sfrp4,20379:up C3,12266:up Ankrd1,107765:down Cx3cr1,13051:down lgfbp3,16009:up Cd109,235505:down Plk2,20620:down Trf,22041:up Cxl14,57266:down Cd24a,12484:down Wnt5a,22418:down Mark1,226778:up Il1rn,16181:up lgf1,16000:up Adipoq,11450:up Bmp4,12159:up Crabp2,12904:down Cxc9,17329:up Tgfb2,21808:down Hpse,15442:up Ptgir,19222:up F3,14066:up Fgfr2,14183:up Clec4e,56619:up Cthrc1,68588:down Htr2b,15559:down Efemp1,216616:up Ccl6,20305:up Aspn,66695:down Mt2,17750:up Saa3,20210:up Vdr,22337:down Cxc6,80901:down Cxl12,20315:up Htr2a,15558:down Smoc2,64074:down Gas6,14456:up Egfr,13649:down Sfrp1,20377:up C1qtnf3,81799:down Tgfb3,21814:up Sncg,20618:up Ceacam1,26365:up Ccl8,20307:up Sfrp2,20319:up Rspo2,239405:up Npnt,114249:up Tnfrsf11b,18383:up Sy13,80976:up Mt1,17748:up Aldh1a2,19378:up Ccl2,20296:up Ccl7,20306:up Pdgfc,54635:down Ednrb,13618:up Figf,14205:up Sema7a,20361:down Slc29a1,63959:up Htra3,78558:down Tnfrsf12a,27279:down Gpm6b,14758:up Clec4n,56620:up Postn,50706:down Dok2,13449:up Akr1c18,105349:up Ncam1,17967:down Bmpr1a,12166:down Ccl12,20293:up Wisp1,22402:down Ccl4,20303:up Chst11,58250:down Tnc,21923:down Ret,19713:up Sdf2l1,64136:up Aldh1a3,56847:down Ppp3,67916:up Creb3l1,26427:down Il1r1,17082:down Kitl,17311:up Lama2,16773:down Hp,15439:up Ccl9,20308:up Ptk7,71461:down Inhba,16323:down Ras11a,68895:up Plat,18791:down Ccl3,20302:up Crfl1,12931:down Vegfa,22339:down Serpine2,20720:up Adamts12,239337:down Lrrc15,74488:down Nxn,18230:down lgf2,16002:up Pparg,19016:up Tnf,21926:up Glp1r,14652:down Col1a2,12843:down Lmcd1,30937:up Tnfrsf23,79201:down Fgfr1,14182:down Hmox1,15368:up Sulf1,240725:down Cd4,12504:up Ptgs2,19225:down Grem1,23892:up Col3a1,12825:down Errfi1,74155:down Enpp1,18605:down Tnfsf9,21950:up                                                              |
| prostate gland development              | GO:0030850 | 2.44E-06 | 4.79E-05 | Sfrp1,20377:up Sulf1,240725:down Wnt5a,22418:down lgf1,16000:up Bmp4,12159:up Tnc,21923:down Mmp2,17390:down Fgfr2,14183:up                                                                                                                                                                                                                                                                                                                                                                                                                                                                                                                                                                                                                                                                                                                                                                                                                                                                                                                                                                                                                                                                                                                                                                                                                                                                                                                                                                                                                                                                                                                                                                                                                                                                                                                                                                                                                                                         |
| cardiac muscle tissue development       | GO:0048738 | 2.47E-06 | 4.83E-05 | Fgfr1,14182:down Col11a1,12814:down Ncam1,17967:down Wnt5a,22418:down Bmpr1a,12166:down Tgfb3,21814:up Aldh1a2,19378:up Wisp1,22402:down Grem1,23892:up lgf1,16000:up Bmp4,12159:up Ankrd1,107765:down Vegfa,22339:down Tgfb2,21808:down Fgfr2,14183:up                                                                                                                                                                                                                                                                                                                                                                                                                                                                                                                                                                                                                                                                                                                                                                                                                                                                                                                                                                                                                                                                                                                                                                                                                                                                                                                                                                                                                                                                                                                                                                                                                                                                                                                             |
| regulation of transferase activity      | GO:0051338 | 2.49E-06 | 4.86E-05 | Htr2b,15559:down Flrt2,399558:down Pdgfc,54635:down Aspn,66695:down Fabp4,11770:up Vegfa,22339:down Htr2a,15558:down Lrrc15,74488:down lgf2,16002:up Gas6,14456:up Pparg,19016:up Tnf,21926:down Trf,22041:up Fgfr1,14182:down Egfr,13649:down Cd24a,12484:down Sfrp1,20377:up Wnt5a,22418:down Cd4,12504:up Il1rn,16181:up Grem1,23892:up Serinc2,230779:down Adipoq,11450:up Bmp4,12159:up lgf1,16000:up Ceacam1,26365:up Sfrp2,20319:up Tgfb2,21808:down Prkar2b,19088:up Errfi1,74155:down Kitl,17311:up                                                                                                                                                                                                                                                                                                                                                                                                                                                                                                                                                                                                                                                                                                                                                                                                                                                                                                                                                                                                                                                                                                                                                                                                                                                                                                                                                                                                                                                                        |



|                                              |            |          |          |                                                                                                                                                                                                                                                                                                                                                                                                                                                                                                                                                                                                                                                                                                                                                                                                                                                                                                                                                                                                                                                                                                                                                                                                                                                                                                                                                                                                                                                                                                                                                                                                                                                                                                                                                                                                                                                                                                                                                                                                                                                                                                                                                                                                                                                                                                                                                                                                                                                                                                                                                                                                                                                                                                                                                                                                                                                                                                                                                                                                                                                                                                                                   |
|----------------------------------------------|------------|----------|----------|-----------------------------------------------------------------------------------------------------------------------------------------------------------------------------------------------------------------------------------------------------------------------------------------------------------------------------------------------------------------------------------------------------------------------------------------------------------------------------------------------------------------------------------------------------------------------------------------------------------------------------------------------------------------------------------------------------------------------------------------------------------------------------------------------------------------------------------------------------------------------------------------------------------------------------------------------------------------------------------------------------------------------------------------------------------------------------------------------------------------------------------------------------------------------------------------------------------------------------------------------------------------------------------------------------------------------------------------------------------------------------------------------------------------------------------------------------------------------------------------------------------------------------------------------------------------------------------------------------------------------------------------------------------------------------------------------------------------------------------------------------------------------------------------------------------------------------------------------------------------------------------------------------------------------------------------------------------------------------------------------------------------------------------------------------------------------------------------------------------------------------------------------------------------------------------------------------------------------------------------------------------------------------------------------------------------------------------------------------------------------------------------------------------------------------------------------------------------------------------------------------------------------------------------------------------------------------------------------------------------------------------------------------------------------------------------------------------------------------------------------------------------------------------------------------------------------------------------------------------------------------------------------------------------------------------------------------------------------------------------------------------------------------------------------------------------------------------------------------------------------------------|
| neurogenesis                                 | GO:0022008 | 2.55E-06 | 4.97E-05 | Adm,11535:up Flrt2,399558:down Plxnd1,67784:up Ccl2,20296:up Aldh1a2,19378:up Figf,14205:up Ednr b,13618:up Sema7a,20361:down Ankrd1,107765:down Tnfrsf12a,27279:down Postn,50706:down Cx3cr1,13051:down Plk2,20620:down Trf,22041:up Cd24a,12484:down Ncam1,17967:down Wnt5a,22418:down Bmpr1a,12166:down Ccl12,20293:up Mark1,226778:up Bmp4,12159:up Igf1,16000:up Crabp2,12904:down Tnc,21923:down Ret,19713:up Tgfb2,21808:down Plpp3,67916:up Fgfr2,14183:up Cthrc1,68588:down Prl2c2,18811:up Lama2,16773:down Efemp1,216616:up Ptk7,71461:down Inhba,16323:down Dpysl3,22240:down Ccl3,20302:up Cxcl12,20315:up Vegfa,22339:down Mmp2,17390:down Serpine2,20720:up Pparg,19016:up Gas6,14456:up Egfr,13649:down Fgfr1,14182:down Sfrp1,20377:up Col3a1,12825:down Sfrp2,20319:up Mcoln3,171166:up Rspo2,239405:up                                                                                                                                                                                                                                                                                                                                                                                                                                                                                                                                                                                                                                                                                                                                                                                                                                                                                                                                                                                                                                                                                                                                                                                                                                                                                                                                                                                                                                                                                                                                                                                                                                                                                                                                                                                                                                                                                                                                                                                                                                                                                                                                                                                                                                                                                                         |
| negative regulation of cartilage development | GO:0061037 | 2.57E-06 | 4.98E-05 | Fam101b,76566:down Efemp1,216616:up Tgfb2,21808:down Adamts12,239337:down Grem1,23892:up Bmp4,12159:up                                                                                                                                                                                                                                                                                                                                                                                                                                                                                                                                                                                                                                                                                                                                                                                                                                                                                                                                                                                                                                                                                                                                                                                                                                                                                                                                                                                                                                                                                                                                                                                                                                                                                                                                                                                                                                                                                                                                                                                                                                                                                                                                                                                                                                                                                                                                                                                                                                                                                                                                                                                                                                                                                                                                                                                                                                                                                                                                                                                                                            |
| regulation of biological process             | GO:0050789 | 2.57E-06 | 4.98E-05 | Fstl3,83554:down Igf1,16000:up Adm,11535:up Flrt2,399558:down Tmem176b,65963:up Plxnd1,67784:up Tfec,21426:up Sfrp4,20379:up Lyl1,17095:up Igf1,16000:up Plk2,20620:down Cd24a,12484:down Irl1,16181:up Maob,109731:up Bmp4,12159:up Oasl1,231655:up Hpse,15442:up Medag,70717:down Ptgir,19222:up Fgfr2,14183:up Thbs2,21826:down Htr2b,15559:down Dram1,71712:up Ccl6,20305:up Sipi,20568:up Aspn,66695:down Mt2,17750:up Cxcr6,80901:down Fam132b,227358:down Nabp1,109019:down Phf11a,219131:up Mmp2,17390:down Oas3,246727:up Slc40a1,53945:up Egfr,13649:down C1rb,667277:up Tfrc,22042:up Sncg,20618:up Ccl8,20307:up Serpina3g,20715:up Rspo2,239405:up Fam20a,208659:down Mt1,17748:up Col5a2,12832:down Aldh1a2,19378:up Ccl2,20296:up Ednr b,13618:up Mmp13,17386:up Htra3,78558:down Tnfrsf12a,27279:down Uchl5,56207:up Clec4n,56620:up Dok2,13449:up Hvcn1,74096:up Ptx3,19288:up Ncam1,17967:down Ccl4,20303:up Chst11,58250:down Vegfb,22340:up Aldh1a3,56847:down Plpp3,67916:up Lrrc17,74511:down Lama2,16773:down Ccl9,20308:up Ptk7,71461:down Inhba,16323:down Bnc2,242509:down Tfpi2,21789:down Crif1,12931:down C1s1,50908:up Plod2,26432:down Vegfa,22339:down Serpine2,20720:up Nxn,18230:down Igf2,16002:up Kdelr3,105785:down Tmem176a,66058:up Tnf,21926:up Col1a2,12843:down Fxyd1,56188:up Fgfr1,14182:down Lpl,16956:up Sulf1,240725:down Susd2,71733:up Cd4,12504:up Col3a1,12825:down Tbx15,21384:down Serpina1,12258:up Enpp1,18605:down Clec2d,93694:up Hpgd,15446:up C3,12266:up Ankrd1,107765:down Cx3cr1,13051:down Cd109,235505:down Loxl2,94352:down Loxl3,16950:down Trf,22041:up Cxcl14,57266:down Wnt5a,22418:down Stc1,20855:up Mark1,226778:up Col8a1,12837:down Adipoq,11450:up Igf1,16000:up Crabp2,12904:down Cxcl9,17329:up Tgfb2,21808:down F3,14066:up Clec4e,56619:up Cthrc1,68588:down Kng1,16644:up Prl2c2,18811:up Efemp1,216616:up Dpysl3,22240:down Nin1,18081:up Saa3,20210:up Vdr,22337:down Pdia5,72599:down Fabp4,11770:up Cxcl12,20315:up Htra2a,15558:down Smoc2,64074:down Gas6,14456:up Sfrp1,20377:up C1qtnf3,81799:down Tgfb3,21814:up Fxyd2,11936:up Serinc2,230779:down Ceacam1,226365:up Sfrp2,20319:up Tnfrsf11b,18383:up Prkar2b,19088:up Npnt,114249:up S100a1,20193:up Icc1,218333:down Ly9,17085:up Ccl7,20306:up Pdgc,54635:down Mgp,17313:up Figf,14205:up Cst7,13011:up Sema7a,20361:down Epas1,13819:up Slc29a1,63959:up Gpm6b,14758:up Ddah1,69219:down Sdpr,20324:down Postn,50706:down Akr1c18,105349:up Ccl12,20293:up Bmpr1a,12166:down Wisp1,22402:down Ank,11732:down Tnc,21923:down Ret,19713:up Prg4,96875:down Sdf2l1,64136:up Pdxk,216134:up C1s2,317677:up Ifit1,15957:up Creb3l1,26427:down Irl1,17082:down Kitl,17311:up Fam101b,76566:down Hp,15439:up Aoah,27052:up Rasl11a,68895:up Plat,18791:down Ccl3,20302:up Cta2a,13024:down Sprx2,68792:down Adamts12,239337:down Lrrc15,74488:down Anpep,16790:up Pparg,19016:up Lmcd1,30937:up Glp1r,14652:down Tnfrsf23,79201:down Hmox1,15368:up Has2,15117:down Ptgs2,19225:down Grem1,23892:up Kcnj15,16516:down Phf11d,219132:up Col5a1,12831:down Errf1,74155:down Tnfsf9,21950:up |
| programmed cell death                        | GO:0012501 | 2.66E-06 | 5.12E-05 | Adm,11535:up Sfrp4,20379:up Aldh1a2,19378:up Ednr b,13618:up Ankrd1,107765:down Tnfrsf12a,27279:down Cx3cr1,13051:down Igf1,16000:up Plk2,20620:down Akr1c18,105349:up Cd24a,12484:down Wnt5a,22418:down Ccl12,20293:up Irl1,16181:up Adipoq,11450:up Bmp4,12159:up Igf1,16000:up Chst11,58250:down Tgfb2,21808:down Pdxk,216134:up Sdf2l1,64136:up Aldh1a3,56847:down Creb3l1,26427:down Fgfr2,14183:up F3,14066:up Kitl,17311:up Htra2b,15559:down Dram1,71712:up Inhba,16323:down Ccl3,20302:up Vdr,22337:down Crif1,12931:down Cxcl12,20315:up Vegfa,22339:down Mmp2,17390:down Slc40a1,53945:up Pparg,19016:up Gas6,14456:up Tnf,21926:up Glp1r,14652:down Tnfrsf23,79201:down Fgfr1,14182:down Egfr,13649:down Hmox1,15368:up Sfrp1,20377:up Sulf1,240725:down Tgfb3,21814:up Ptgs2,19225:down Grem1,23892:up Ceacam1,26365:up Sfrp2,20319:up Serpina3g,20715:up Tnfrsf11b,18383:up Mt1,17748:up                                                                                                                                                                                                                                                                                                                                                                                                                                                                                                                                                                                                                                                                                                                                                                                                                                                                                                                                                                                                                                                                                                                                                                                                                                                                                                                                                                                                                                                                                                                                                                                                                                                                                                                                                                                                                                                                                                                                                                                                                                                                                                                                                                                                                            |
| multicellular organismal metabolic process   | GO:0044236 | 2.68E-06 | 5.13E-05 | Pparg,19016:up Tgfb3,21814:up Ccl2,20296:up Mmp13,17386:up Bmp4,12159:up Serpinh1,12406:down Col5a1,12831:down Mmp2,17390:down Errf1,74155:down Mrc2,17534:down                                                                                                                                                                                                                                                                                                                                                                                                                                                                                                                                                                                                                                                                                                                                                                                                                                                                                                                                                                                                                                                                                                                                                                                                                                                                                                                                                                                                                                                                                                                                                                                                                                                                                                                                                                                                                                                                                                                                                                                                                                                                                                                                                                                                                                                                                                                                                                                                                                                                                                                                                                                                                                                                                                                                                                                                                                                                                                                                                                   |
| regulation of leukocyte chemotaxis           | GO:0002688 | 2.68E-06 | 5.13E-05 | Gas6,14456:up Cxcl14,57266:down Wnt5a,22418:down Ccl2,20296:up Ccl12,20293:up Figf,14205:up Grem1,23892:up Ccl4,20303:up Cxcl9,17329:up Cxcl12,20315:up                                                                                                                                                                                                                                                                                                                                                                                                                                                                                                                                                                                                                                                                                                                                                                                                                                                                                                                                                                                                                                                                                                                                                                                                                                                                                                                                                                                                                                                                                                                                                                                                                                                                                                                                                                                                                                                                                                                                                                                                                                                                                                                                                                                                                                                                                                                                                                                                                                                                                                                                                                                                                                                                                                                                                                                                                                                                                                                                                                           |
| signaling                                    | GO:0023052 | 2.69E-06 | 5.13E-05 | Fstl3,83554:down Igf1,16000:up Adm,11535:up Flrt2,399558:down Hpgd,15446:up Plxnd1,67784:up Sfrp4,20379:up C3,12266:up Ankrd1,107765:down Cx3cr1,13051:down Igf1,16000:up Cd109,235505:down Plk2,20620:down Trf,22041:up Cxcl14,57266:down Cd24a,12484:down Wnt5a,22418:down Mark1,226778:up Irl1,16181:up Igf1,16000:up Adipoq,11450:up Bmp4,12159:up Crabp2,12904:down Cxcl9,17329:up Tgfb2,21808:down Hpse,15442:up Ptgir,19222:up F3,14066:up Fgfr2,14183:up Clec4e,56619:up Cthrc1,68588:down Htra2b,15559:down Efemp1,216616:up Ccl6,20305:up Aspn,66695:down Mt2,17750:up Saa3,20210:up Vdr,22337:down Cxcr6,80901:down Cxcl12,20315:up Htra2a,15558:down Smoc2,64074:down Gas6,14456:up Egfr,13649:down Sfrp1,20377:up C1qtnf3,81799:down Tgfb3,21814:up Sncg,20618:up Ceacam1,26365:up Ccl8,20307:up Sfrp2,20319:up Rspo2,239405:down Npnt,114249:up Tnfrsf11b,18383:up Syty13,80976:up Mt1,17748:up Aldh1a2,19378:up Ccl2,20296:up Ccl7,20306:up Pdgc,54635:down Ednr b,13618:up Figf,14205:up Sema7a,20361:down Slc29a1,63959:up Htra3,78558:down Tnfrsf12a,27279:down Gpm6b,14758:up Clec4n,56620:up Postn,50706:down Dok2,13449:up Akr1c18,105349:up Ncam1,17967:down Bmpr1a,12166:down Ccl12,20293:up Wisp1,22402:down Ccl4,20303:up Chst11,58250:down Tnc,21923:down Ret,19713:up Sdf2l1,64136:up Aldh1a3,56847:down Plpp3,67916:up Creb3l1,26427:down Irl1,17082:down Kitl,17311:up Lama2,16773:down Hp,15439:up Ccl9,20308:up Ptk7,71461:down Inhba,16323:down Rasl11a,68895:up Plat,18791:down Ccl3,20302:up Crif1,12931:down Vegfa,22339:down Serpine2,20720:up Adamts12,239337:down Lrrc15,74488:down Nxn,18230:down Igf2,16002:up Pparg,19016:up Tnf,21926:up Glp1r,14652:down Col1a2,12843:down Lmcd1,30937:up Tnfrsf23,79201:down Fgfr1,14182:down Hmox1,15368:up Sulf1,240725:down Cd4,12504:up Ptgs2,19225:down Grem1,23892:up Col3a1,12825:down Errf1,74155:down Enpp1,18605:down Tnfsf9,21950:up                                                                                                                                                                                                                                                                                                                                                                                                                                                                                                                                                                                                                                                                                                                                                                                                                                                                                                                                                                                                                                                                                                                                                                                                       |
| regulation of epidermis development          | GO:0045682 | 2.71E-06 | 5.16E-05 | Tnf,21926:up Inhba,16323:down Sfrp4,20379:up Bmp4,12159:up Vdr,22337:down Hpse,15442:up Tgfb2,21808:down Cd109,235505:down Errf1,74155:down                                                                                                                                                                                                                                                                                                                                                                                                                                                                                                                                                                                                                                                                                                                                                                                                                                                                                                                                                                                                                                                                                                                                                                                                                                                                                                                                                                                                                                                                                                                                                                                                                                                                                                                                                                                                                                                                                                                                                                                                                                                                                                                                                                                                                                                                                                                                                                                                                                                                                                                                                                                                                                                                                                                                                                                                                                                                                                                                                                                       |

|                                                                                                 |            |          |          |                                                                                                                                                                                                                                                                                                                                                                                                                                                                                                                                                                                                                                                                                                                                                                                                                                                                                                                                                                                                                                                                                                                                                                                                      |
|-------------------------------------------------------------------------------------------------|------------|----------|----------|------------------------------------------------------------------------------------------------------------------------------------------------------------------------------------------------------------------------------------------------------------------------------------------------------------------------------------------------------------------------------------------------------------------------------------------------------------------------------------------------------------------------------------------------------------------------------------------------------------------------------------------------------------------------------------------------------------------------------------------------------------------------------------------------------------------------------------------------------------------------------------------------------------------------------------------------------------------------------------------------------------------------------------------------------------------------------------------------------------------------------------------------------------------------------------------------------|
| regulation of cell-cell adhesion                                                                | GO:0022407 | 2.82E-06 | 5.33E-05 | Fstl3,83554:down Ccl2,20296:up Ctla2a,13024:down Cxcl12,20315:up Vegfa,22339:down Serpine2,20720:up lgf2,16002:up Tnf,21926:up Cd24a,12484:down Has2,15117:down Wnt5a,22418:down Cd4,12504:up Il1rn,16181:up Tfrc,22042:up Adipoq,11450:up Bmp4,12159:up lgf1,16000:up Ceacam1,26365:up Plpp3,67916:up Tnfsf9,21950:up                                                                                                                                                                                                                                                                                                                                                                                                                                                                                                                                                                                                                                                                                                                                                                                                                                                                               |
| positive regulation of protein kinase activity                                                  | GO:0045860 | 2.82E-06 | 5.33E-05 | Htr2b,15559:down Pdgfc,54635:down Vegfa,22339:down Htr2a,15558:down Gas6,14456:up Tnf,21926:up Trf,22041:up Cd24a,12484:down Egfr,13649:down Fgfr1,14182:down Wnt5a,22418:down Cd4,12504:up Il1rn,16181:up Grem1,23892:up Adipoq,11450:up Bmp4,12159:up lgf1,16000:up Ceacam1,26365:up Tgfb2,21808:down Kitl,17311:up                                                                                                                                                                                                                                                                                                                                                                                                                                                                                                                                                                                                                                                                                                                                                                                                                                                                                |
| positive regulation of molecular function                                                       | GO:0044093 | 2.93E-06 | 5.53E-05 | Plxnd1,67784:up Ccl7,20306:up Ccl2,20296:up Pdgfc,54635:down Plk2,20620:down Trf,22041:up Cd24a,12484:down Wnt5a,22418:down Ccl12,20293:up Il1rn,16181:up Ccl4,20303:up Adipoq,11450:up Bmp4,12159:up lgf1,16000:up Tgfb2,21808:down Plpp3,67916:up Fgfr2,14183:up F3,14066:up Kitl,17311:up Cthrc1,68588:down Htr2b,15559:down Ccl9,20308:up Ccl6,20305:up Ccl3,20302:up Vdr,22337:down Vegfa,22339:down Htr2a,15558:down lgf2,16002:up Pparg,19016:up Gas6,14456:up Tnf,21926:up Egfr,13649:down Fgfr1,14182:down Cd4,12504:up Tgfb3,21814:up Grem1,23892:up Serinc2,230779:down Ccl8,20307:up Ceacam1,26365:up Sfrp2,20319:up Npnt,114249:up S100a1,20193:up                                                                                                                                                                                                                                                                                                                                                                                                                                                                                                                                      |
| regulation of kinase activity                                                                   | GO:0043549 | 3.03E-06 | 5.70E-05 | Htr2b,15559:down Flrt2,399558:down Pdgfc,54635:down Aspn,66695:down Fabp4,11770:up Vegfa,22339:down Htr2a,15558:down Lrrc15,74488:down Gas6,14456:up Tnf,21926:up Trf,22041:up Fgfr1,14182:down Egfr,13649:down Cd24a,12484:down Sfrp1,20377:up Wnt5a,22418:down Cd4,12504:up Il1rn,16181:up Grem1,23892:up Adipoq,11450:up Bmp4,12159:up lgf1,16000:up Ceacam1,26365:up Sfrp2,20319:up Tgfb2,21808:down Prkar2b,19088:up Erff1,74155:down Kitl,17311:up                                                                                                                                                                                                                                                                                                                                                                                                                                                                                                                                                                                                                                                                                                                                             |
| positive regulation of immune system process                                                    | GO:0002684 | 3.07E-06 | 5.75E-05 | Inhba,16323:down Ccl2,20296:up C3,12266:up Figf,14205:up Ccl3,20302:up Sema7a,20361:down C1s1,50908:up Cxcl12,20315:up Mmp2,17390:down lgf2,16002:up Gas6,14456:up Tnf,21926:up Cxcl14,57266:down Cd24a,12484:down Hmox1,15368:up Wnt5a,22418:down Cd4,12504:up Ccl12,20293:up C1rb,667277:up Tfrc,22042:up Ccl4,20303:up lgf1,16000:up Ceacam1,26365:up Serping1,12258:up Cxcl9,17329:up Tgfb2,21808:down C1s2,317677:up Il1rl1,17082:down Tnfsf9,21950:up Kitl,17311:up                                                                                                                                                                                                                                                                                                                                                                                                                                                                                                                                                                                                                                                                                                                            |
| negative regulation of cell migration                                                           | GO:0030336 | 3.18E-06 | 5.92E-05 | Sfrp1,20377:up Sulf1,240725:down Bmpr1a,12166:down Tgfb3,21814:up Ccl12,20293:up Dpysl3,22240:down Stc1,20855:up Il1rn,16181:up Grem1,23892:up Col3a1,12825:down Adipoq,11450:up Sfrp2,20319:up Cxcl12,20315:up Cx3cr1,13051:down lgfbp3,16009:up                                                                                                                                                                                                                                                                                                                                                                                                                                                                                                                                                                                                                                                                                                                                                                                                                                                                                                                                                    |
| osteoclast differentiation                                                                      | GO:0030316 | 3.34E-06 | 6.17E-05 | Fstl3,83554:down Tnf,21926:up Clec2d,93694:up Trf,22041:up Lrrc17,74511:down Sfrp1,20377:up Tfrc,22042:up Ccl3,20302:up Ceacam1,26365:up Cd109,235505:down                                                                                                                                                                                                                                                                                                                                                                                                                                                                                                                                                                                                                                                                                                                                                                                                                                                                                                                                                                                                                                           |
| single organismal cell-cell adhesion                                                            | GO:0016337 | 3.43E-06 | 6.31E-05 | Fstl3,83554:down Ly9,17085:up Ccl2,20296:up Ctla2a,13024:down Sprx2,68792:down Cxcl12,20315:up Vegfa,22339:down Serpine2,20720:up lgf2,16002:up Tnf,21926:up Egfr,13649:down Cd24a,12484:down Ncam1,17967:down Has2,15117:down Wnt5a,22418:down Cd4,12504:up Il1rn,16181:up Tfrc,22042:up Adipoq,11450:up Bmp4,12159:up lgf1,16000:up Ceacam1,26365:up Ret,19713:up Tgfb2,21808:down Cdsn,386463:up Npnt,114249:up Plpp3,67916:up Tnfsf9,21950:up Clec4e,56619:up                                                                                                                                                                                                                                                                                                                                                                                                                                                                                                                                                                                                                                                                                                                                    |
| phosphate-containing compound metabolic process                                                 | GO:0006796 | 3.52E-06 | 6.42E-05 | lgfbp4,16010:up Adm,11535:up Flrt2,399558:down Sfrp4,20379:up C3,12266:up Enpp5,83965:up lgfbp3,16009:up Cd109,235505:down Plk2,20620:down Trf,22041:up Cd24a,12484:down Wnt5a,22418:down Mark1,226778:up Il1rn,16181:up Adipoq,11450:up Bmp4,12159:up lgf1,16000:up Tgfb2,21808:down Ptgir,19222:up Fgfr2,14183:up Htr2b,15559:down Efemp1,216616:up Ccl6,20305:up Aspn,66695:down Saa3,20210:up Fabp4,11770:up Htr2a,15558:down Gas6,14456:up Egfr,13649:down Alpl,11647:up Sfrp1,20377:up C1qtnf3,81799:down Tgfb3,21814:up Serinc2,230779:down Ceacam1,26365:up Ccl8,20307:up Sfrp2,20319:up Fam20a,208659:down Npnt,114249:up Tnfrsf1b,18383:up Prkar2b,19088:up Ccl2,20296:up Ccl7,20306:up Ednr,13618:up Pdgfc,54635:down Ampd3,11717:up Sema7a,20361:down Enpp3,209558:down Dok2,13449:up Fabp5,16592:up Ccl12,20293:up Bmpr1a,12166:down Ccl4,20303:up Ret,19713:up Pdxxk,216134:up Plpp3,67916:up Kitl,17311:up Ccl9,20308:up Inhba,16323:down Ccl3,20302:up Sprx2,68792:down Crfl1,12931:down Gfpt2,14584:down Vegfa,22339:down Cbr2,12409:up Lrrc15,74488:down lgf2,16002:up Tnf,21926:up Fgfr1,14182:down Cd4,12504:up Grem1,23892:up Uck2,80914:down Erff1,74155:down Enpp1,18605:down |
| digestive system development                                                                    | GO:0055123 | 3.52E-06 | 6.42E-05 | Egfr,13649:down Sfrp1,20377:up Wnt5a,22418:down Aldh1a2,19378:up Pdgfc,54635:down Ednr,13618:up Col3a1,12825:down lgf1,16000:up Bmp4,12159:up Sfrp2,20319:up Fgfr2,14183:up lgf2,16002:up                                                                                                                                                                                                                                                                                                                                                                                                                                                                                                                                                                                                                                                                                                                                                                                                                                                                                                                                                                                                            |
| negative regulation of transmembrane receptor protein serine/threonine kinase signaling pathway | GO:0090101 | 3.71E-06 | 6.74E-05 | Fstl3,83554:down Sfrp1,20377:up Wnt5a,22418:down Tgfb3,21814:up Aspn,66695:down Grem1,23892:up Chst11,58250:down Htra3,78558:down Sfrp2,20319:up Cd109,235505:down                                                                                                                                                                                                                                                                                                                                                                                                                                                                                                                                                                                                                                                                                                                                                                                                                                                                                                                                                                                                                                   |
| regulation of muscle cell differentiation                                                       | GO:0051147 | 3.86E-06 | 6.99E-05 | Tnf,21926:up Prl2c2,18811:up Cxcl14,57266:down Ccl9,20308:up Wisp1,22402:down Grem1,23892:up lgf1,16000:up Bmp4,12159:up Ccl8,20307:up Cxcl9,17329:up Cxcl12,20315:up lgfbp3,16009:up Fgfr2,14183:up                                                                                                                                                                                                                                                                                                                                                                                                                                                                                                                                                                                                                                                                                                                                                                                                                                                                                                                                                                                                 |
| regulation of myoblast differentiation                                                          | GO:0045661 | 3.89E-06 | 7.02E-05 | Tnf,21926:up Prl2c2,18811:up Cxcl14,57266:down Ccl9,20308:up Bmp4,12159:up Ccl8,20307:up Cxcl9,17329:up lgfbp3,16009:up                                                                                                                                                                                                                                                                                                                                                                                                                                                                                                                                                                                                                                                                                                                                                                                                                                                                                                                                                                                                                                                                              |
| negative regulation of locomotion                                                               | GO:0040013 | 4.03E-06 | 7.25E-05 | Dpysl3,22240:down Cxcl12,20315:up Cx3cr1,13051:down lgfbp3,16009:up Ptx3,19288:up Sfrp1,20377:up Sulf1,240725:down Ccl12,20293:up Tgfb3,21814:up Bmpr1a,12166:down Wnt5a,22418:down Il1rn,16181:up Stc1,20855:up Grem1,23892:up Adipoq,11450:up Col3a1,12825:down Sfrp2,20319:up                                                                                                                                                                                                                                                                                                                                                                                                                                                                                                                                                                                                                                                                                                                                                                                                                                                                                                                     |
| cell-cell signaling                                                                             | GO:0007267 | 4.11E-06 | 7.36E-05 | Adm,11535:up Sfrp4,20379:up Ccl2,20296:up Slc29a1,63959:up Gpm6b,14758:up Cx3cr1,13051:down Plk2,20620:down Cxcl14,57266:down Cd24a,12484:down Ncam1,17967:down Wnt5a,22418:down Wisp1,22402:down Mark1,226778:up Il1rn,16181:up Adipoq,11450:up Bmp4,12159:up Tnc,21923:down Plpp3,67916:up Fgfr2,14183:up Cthrc1,68588:down Htr2b,15559:down Lama2,16773:down Ptk7,71461:down Inhba,16323:down Plat,18791:down Htr2a,15558:down Serpine2,20720:up Nxn,18230:down Tnf,21926:up Pparg,19016:up Glp1r,14652:down Egfr,13649:down Fgfr1,14182:down Sfrp1,20377:up Sulf1,240725:down C1qtnf3,81799:down Ptgs2,19225:down Grem1,23892:up Sncg,20618:up Sfrp2,20319:up Rspo2,239405:up Syt13,80976:up Tnfsf9,21950:up                                                                                                                                                                                                                                                                                                                                                                                                                                                                                     |
| myeloid cell differentiation                                                                    | GO:0030099 | 4.11E-06 | 7.36E-05 | Fstl3,83554:down Clec2d,93694:up Lrrc17,74511:down Inhba,16323:down Ccl3,20302:up Epas1,13819:up Vegfa,22339:down Cd109,235505:down Pparg,19016:up Tnf,21926:up Trf,22041:up Sfrp1,20377:up Tgfb3,21814:up Tfrc,22042:up Adipoq,11450:up Bmp4,12159:up Ceacam1,26365:up Kitl,17311:up Tnfsf9,21950:up                                                                                                                                                                                                                                                                                                                                                                                                                                                                                                                                                                                                                                                                                                                                                                                                                                                                                                |
| positive regulation of epithelial cell proliferation                                            | GO:0050679 | 4.15E-06 | 7.41E-05 | Htr2b,15559:down Egfr,13649:down Has2,15117:down Sfrp1,20377:up Wnt5a,22418:down Bmpr1a,12166:down Ccl2,20296:up lgf1,16000:up Bmp4,12159:up Cxcl12,20315:up Vegfa,22339:down F3,14066:up Fgfr2,14183:up                                                                                                                                                                                                                                                                                                                                                                                                                                                                                                                                                                                                                                                                                                                                                                                                                                                                                                                                                                                             |

|                                                                  |            |          |          |                                                                                                                                                                                                                                                                                                                                                                                                                                                                                                                                                                                                                                                                                                                                                                                        |
|------------------------------------------------------------------|------------|----------|----------|----------------------------------------------------------------------------------------------------------------------------------------------------------------------------------------------------------------------------------------------------------------------------------------------------------------------------------------------------------------------------------------------------------------------------------------------------------------------------------------------------------------------------------------------------------------------------------------------------------------------------------------------------------------------------------------------------------------------------------------------------------------------------------------|
| regulation of epithelial cell migration                          | GO:0010632 | 4.46E-06 | 7.92E-05 | Prl2c2,18811:up Fgfr1,14182:down Has2,15117:down Wnt5a,22418:down Tgfb3,21814:up Ptgs2,19225:down Stc1,20855:up Bmp4,12159:up Ceacam1,26365:up Srxp2,68792:down Vegfa,22339:down Tgfb2,21808:down Ppp3,67916:up                                                                                                                                                                                                                                                                                                                                                                                                                                                                                                                                                                        |
| muscle cell differentiation                                      | GO:0042692 | 4.60E-06 | 8.15E-05 | Prl2c2,18811:up Adm,11535:up Ccl9,20308:up Ednr,13618:up Epas1,13819:up Ankrd1,107765:down Cxc12,20315:up Vegfa,22339:down Igfbp3,16009:up Ig2,16002:up Tnf,21926:up Cxc14,57266:down Wisp1,22402:down Grem1,23892:up Bmp4,12159:up Ig1,16000:up Ccl8,20307:up Cxc19,17329:up Npnt,114249:up Fgfr2,14183:up                                                                                                                                                                                                                                                                                                                                                                                                                                                                            |
| response to transforming growth factor beta                      | GO:0071559 | 4.79E-06 | 8.43E-05 | Col1a2,12843:down Akr1c18,105349:up Hpgd,15446:up Tgfb3,21814:up Ccl2,20296:up Aspn,66695:down Col3a1,12825:down Ankrd1,107765:down Htra3,78558:down Chst11,58250:down Tgfb2,21808:down Npnt,114249:up Cd109,235505:down                                                                                                                                                                                                                                                                                                                                                                                                                                                                                                                                                               |
| cellular response to transforming growth factor beta stimulus    | GO:0071560 | 4.79E-06 | 8.43E-05 | Col1a2,12843:down Akr1c18,105349:up Hpgd,15446:up Tgfb3,21814:up Ccl2,20296:up Aspn,66695:down Col3a1,12825:down Ankrd1,107765:down Htra3,78558:down Chst11,58250:down Tgfb2,21808:down Npnt,114249:up Cd109,235505:down                                                                                                                                                                                                                                                                                                                                                                                                                                                                                                                                                               |
| establishment of planar polarity involved in neural tube closure | GO:0090177 | 4.82E-06 | 8.43E-05 | Cthrc1,68588:down Sfrp2,20319:up Sfrp1,20377:up Ptk7,71461:down Wnt5a,22418:down                                                                                                                                                                                                                                                                                                                                                                                                                                                                                                                                                                                                                                                                                                       |
| positive regulation of protein kinase B signaling                | GO:0051897 | 5.05E-06 | 8.80E-05 | Tnf,21926:up Gas6,14456:up Akr1c18,105349:up Egfr,13649:down C1qtnf3,81799:down Ig1,16000:up Hspse,15442:up F3,14066:up Ig2,16002:up                                                                                                                                                                                                                                                                                                                                                                                                                                                                                                                                                                                                                                                   |
| homeostatic process                                              | GO:0042592 | 5.17E-06 | 8.98E-05 | Adm,11535:up Sfrp4,20379:up Ccl2,20296:up Ednr,13618:up Ampa3,11717:up Epas1,13819:up Steap1,70358:down Trf,22041:up Cd24a,12484:down Stc1,20855:up Il1rn,16181:up Adipoq,11450:up Bmp4,12159:up Ig1,16000:up Tgfb2,21808:down Ptgir,19222:up Kitl,17311:up Htr2b,15559:down Kng1,16644:up Inhba,16323:down Mt2,17750:up Ccl3,20302:up Vdr,22337:down Pdia5,72599:down Fabp4,11770:up Fam132b,227358:down Vegfa,22339:down Htra2a,15558:down Nxn,18230:down Anpep,16790:up Slc40a1,53945:up Gas6,14456:up Pparg,19016:up Tnf,21926:up Glp1r,14652:down Fxyd1,56188:up Egfr,13649:down Lpl,16956:up Hmox1,15368:up C1qtnf3,81799:down Cd4,12504:up Tgfb3,21814:up Ptgs2,19225:down Tfrc,22042:up Ceacam1,26365:up Fam20a,208659:down Tnfrsf11b,18383:up Enpp1,18605:down Mt1,17748:down |
| negative regulation of cell motility                             | GO:2000146 | 5.18E-06 | 8.98E-05 | Sfrp1,20377:up Sulf1,240725:down Bmpr1a,12166:down Tgfb3,21814:up Ccl12,20293:up Dpysl3,22240:down Stc1,20855:up Il1rn,16181:up Grem1,23892:up Col3a1,12825:down Adipoq,11450:up Sfrp2,20319:up Cxc12,20315:up Cx3cr1,13051:down Igfbp3,16009:up                                                                                                                                                                                                                                                                                                                                                                                                                                                                                                                                       |
| positive regulation of endocytosis                               | GO:0045807 | 5.26E-06 | 9.10E-05 | Tnf,21926:up Pparg,19016:up Gas6,14456:up Trf,22041:up Ptx3,19288:up Wnt5a,22418:down Sfrp4,20379:up Ccl2,20296:up C3,12266:up Grem1,23892:up Vegfa,22339:down                                                                                                                                                                                                                                                                                                                                                                                                                                                                                                                                                                                                                         |
| positive regulation of apoptotic process                         | GO:0043065 | 5.43E-06 | 9.32E-05 | Adm,11535:up Inhba,16323:down Sfrp4,20379:up Aldh1a2,19378:up Ccl3,20302:up Ankrd1,107765:down Tnfrsf12a,27279:down Vdr,22337:down Mmp2,17390:down Igfbp3,16009:up Pparg,19016:up Tnf,21926:up Akr1c18,105349:up Cd24a,12484:down Hmox1,15368:up Sfrp1,20377:up Wnt5a,22418:down Ptgs2,19225:down Adipoq,11450:up Bmp4,12159:up Ceacam1,26365:up Sfrp2,20319:up Tgfb2,21808:down Aldh1a3,56847:down F3,14066:up                                                                                                                                                                                                                                                                                                                                                                        |
| cell growth                                                      | GO:0016049 | 5.43E-06 | 9.32E-05 | Igfbp4,16010:up Plxnd1,67784:up Inhba,16323:down Sema7a,20361:down Htra3,78558:down Tnfrsf12a,27279:down Cxc12,20315:up Postn,50706:down Vegfa,22339:down Igfbp3,16009:up Serpine2,20720:up Pparg,19016:up Egfr,13649:down Sfrp1,20377:up Wnt5a,22418:down Tgfb3,21814:up Wisp1,22402:down Grem1,23892:up Ig1,16000:up Sfrp2,20319:up Crabp2,12904:down Tgfb2,21808:down Enpp1,18605:down                                                                                                                                                                                                                                                                                                                                                                                              |
| response to acid chemical                                        | GO:0011101 | 5.49E-06 | 9.39E-05 | Col5a2,12832:down Tnf,21926:up Pparg,19016:up Col1a2,12843:down Akr1c18,105349:up Egfr,13649:down Ptk7,71461:down Tgfb3,21814:up Aldh1a2,19378:up Pdgc,54635:down Col3a1,12825:down Ret,19713:up Mmp2,17390:down Ptgir,19222:up Cdo1,12583:up                                                                                                                                                                                                                                                                                                                                                                                                                                                                                                                                          |
| trabecula formation                                              | GO:0060343 | 5.61E-06 | 9.52E-05 | Sfrp1,20377:up Vegfa,22339:down Tgfb3,21814:up Mmp2,17390:down Grem1,23892:up Slc40a1,53945:up                                                                                                                                                                                                                                                                                                                                                                                                                                                                                                                                                                                                                                                                                         |
| chondrocyte development                                          | GO:0002063 | 5.61E-06 | 9.52E-05 | Fam101b,76566:down Chst11,58250:down Serpinh1,12406:down Sfrp2,20319:up Col11a1,12814:down Sulf1,240725:down                                                                                                                                                                                                                                                                                                                                                                                                                                                                                                                                                                                                                                                                           |
| regulation of leukocyte differentiation                          | GO:1902105 | 5.63E-06 | 9.52E-05 | Fstl3,83554:down Clec2d,93694:up Lrrc17,74511:down Tmem176b,65963:up Ccl3,20302:up Ctla2a,13024:down Gas6,14456:up Tnf,21926:up Tmem176a,66058:up Cd24a,12484:down Sfrp1,20377:up Adipoq,11450:up Bmp4,12159:up Ceacam1,26365:up Tnfrsf9,21950:up Kitl,17311:up                                                                                                                                                                                                                                                                                                                                                                                                                                                                                                                        |
| negative regulation of cellular component movement               | GO:0051271 | 5.63E-06 | 9.52E-05 | Dpysl3,22240:down Cxc12,20315:up Cx3cr1,13051:down Igfbp3,16009:up Sfrp1,20377:up Ccl12,20293:up Tgfb3,21814:up Bmpr1a,12166:down Wnt5a,22418:down Sulf1,240725:down Il1rn,16181:up Stc1,20855:up Grem1,23892:up Adipoq,11450:up Col3a1,12825:down Sfrp2,20319:up                                                                                                                                                                                                                                                                                                                                                                                                                                                                                                                      |
| secretion by cell                                                | GO:0032940 | 5.95E-06 | 1.00E-04 | Adm,11535:up Mmp13,17386:up Ankrd1,107765:down Clec4n,56620:up Postn,50706:down Ncam1,17967:down Wnt5a,22418:down Il1rn,16181:up Maob,109731:up Adipoq,11450:up Ig1,16000:up Tgfb2,21808:down Creb3l1,26427:down Il1r1,17082:down Clec4e,56619:up Htr2b,15559:down Inhba,16323:down Ccl3,20302:up Cxc12,20315:up Htra2a,15558:down Serpine2,20720:up Tnf,21926:up Pparg,19016:up Gas6,14456:up Glp1r,14652:down Egfr,13649:down Fgfr1,14182:down Sfrp1,20377:up Lpl,16956:up Hmox1,15368:up C1qtnf3,81799:down Sncg,20618:up Ceacam1,26365:up Sytn1,80976:up                                                                                                                                                                                                                           |
| negative regulation of epithelial cell proliferation             | GO:0050680 | 6.26E-06 | 1.05E-04 | Sfrp1,20377:up Sulf1,240725:down Wnt5a,22418:down Tgfb3,21814:up Bmp4,12159:up Ceacam1,26365:up Vdr,22337:down Sfrp2,20319:up Tgfb2,21808:down Cd109,235505:down Fgfr2,14183:up                                                                                                                                                                                                                                                                                                                                                                                                                                                                                                                                                                                                        |
| regulation of biomineral tissue development                      | GO:0070167 | 6.38E-06 | 1.07E-04 | Fam101b,76566:down Gas6,14456:up Bmpr1a,12166:down Mgp,17313:up Aspn,66695:down Grem1,23892:up Bmp4,12159:up Gpm6b,14758:up Ank,11732:down                                                                                                                                                                                                                                                                                                                                                                                                                                                                                                                                                                                                                                             |
| positive regulation of programmed cell death                     | GO:0043068 | 6.44E-06 | 1.07E-04 | Adm,11535:up Inhba,16323:down Sfrp4,20379:up Aldh1a2,19378:up Ccl3,20302:up Ankrd1,107765:down Tnfrsf12a,27279:down Vdr,22337:down Mmp2,17390:down Igfbp3,16009:up Pparg,19016:up Tnf,21926:up Akr1c18,105349:up Cd24a,12484:down Hmox1,15368:up Sfrp1,20377:up Wnt5a,22418:down Ptgs2,19225:down Adipoq,11450:up Bmp4,12159:up Ceacam1,26365:up Sfrp2,20319:up Tgfb2,21808:down Aldh1a3,56847:down F3,14066:up                                                                                                                                                                                                                                                                                                                                                                        |

|                                                   |             |          |          |                                                                                                                                                                                                                                                                                                                                                                                                                                                                                                                                                                                                                                                                                                                                                                                                                                                                                                                                                                                                                                                                                                                                                                                                     |
|---------------------------------------------------|-------------|----------|----------|-----------------------------------------------------------------------------------------------------------------------------------------------------------------------------------------------------------------------------------------------------------------------------------------------------------------------------------------------------------------------------------------------------------------------------------------------------------------------------------------------------------------------------------------------------------------------------------------------------------------------------------------------------------------------------------------------------------------------------------------------------------------------------------------------------------------------------------------------------------------------------------------------------------------------------------------------------------------------------------------------------------------------------------------------------------------------------------------------------------------------------------------------------------------------------------------------------|
| phosphorus metabolic process                      | GO:0006793  | 6.57E-06 | 1.09E-04 | Igfbp4,16010:up Adm,11535:up Flrt2,399558:down Sfrp4,20379:up C3,12266:up Enpp5,83965:up Igfbp3,16009:up Cd109,235505:down Plk2,20620:down Trf,22041:up Cd24a,12484:down Wnt5a,22418:down Mar1,226778:up Il1rn,16181:up Adipoq,11450:up Bmp4,12159:up Igf1,16000:up Tgfb2,21808:down Ptgir,19222:up Fgfr2,14183:up Htr2b,15559:down Efemp1,216616:up Ccl6,20305:up Aspn,66695:down Saa3,20210:up Fabp4,11770:up Htr2a,15558:down Gas6,14456:up Egfr,13649:down Alpl,11647:up Sfrp1,20377:up C1qtnf3,81799:down Tgfb3,21814:up Serinc2,230779:down Ceacam1,26365:up Ccl8,20307:up Sfrp2,20319:up Fam20a,208659:down Npnt,114249:up Tnfrsf11b,18383:up Prkar2b,19088:up Ccl2,20296:up Cd7,20306:up Ednrb,13618:up Pdgfc,54635:down Ampd3,11717:up Sema7a,20361:down Enpp3,209558:down Dok2,13449:up Fabp5,16592:up Ccl12,20293:up Bmpr1a,12166:down Ccl4,20303:up Ret,19713:up Pdxk,216134:up Plpp3,67916:up Kitl,17311:up Ccl9,20308:up Inhba,16323:down Ccl3,20302:up Srp2,68792:down Crif1,12931:down Gfpt2,14584:down Vegfa,22339:down Cbr2,12409:up Lrrc15,74488:down Igf2,16002:up Tnf,21926:up Fgfr1,14182:down Cd4,12504:up Grem1,23892:up Uck2,80914:down Errfi1,74155:down Enpp1,18605:down |
| positive regulation of cell death                 | GO:0010942  | 6.77E-06 | 1.12E-04 | Adm,11535:up Hp,15439:up Inhba,16323:down Sfrp4,20379:up Aldh1a2,19378:up Ccl3,20302:up Ankrd1,107765:down Tnfrsf12a,27279:down Vdr,22337:down Mmp2,17390:down Igfbp3,16009:up Pparg,19016:up Tnf,21926:up Akr1c18,105349:up Cd24a,12484:down Hmox1,15368:up Sfrp1,20377:up Wnt5a,22418:down Ptgs2,19225:down Adipoq,11450:up Bmp4,12159:up Ceacam1,26365:up Sfrp2,20319:up Tgfb2,21808:down Aldh1a3,56847:down F3,14066:up                                                                                                                                                                                                                                                                                                                                                                                                                                                                                                                                                                                                                                                                                                                                                                         |
| morphogenesis of embryonic epithelium             | GO:0016331  | 6.80E-06 | 1.12E-04 | Cthrc1,68588:down Adm,11535:up Sfrp1,20377:up Sulf1,240725:down Ptk7,71461:down Wnt5a,22418:down Aldh1a2,19378:up Grem1,23892:up Bmp4,12159:up Sfrp2,20319:up Ret,19713:up Aldh1a3,56847:down Fgfr2,14183:up                                                                                                                                                                                                                                                                                                                                                                                                                                                                                                                                                                                                                                                                                                                                                                                                                                                                                                                                                                                        |
| positive regulation of epithelial cell migration  | GO:0010634  | 6.81E-06 | 1.12E-04 | Prl2c2,18811:up Fgfr1,14182:down Has2,15117:down Wnt5a,22418:down Ptgs2,19225:down Bmp4,12159:up Srp2,68792:down Tgfb2,21808:down Vegfa,22339:down Plpp3,67916:up                                                                                                                                                                                                                                                                                                                                                                                                                                                                                                                                                                                                                                                                                                                                                                                                                                                                                                                                                                                                                                   |
| regulation of hydrolase activity                  | GO:0051336  | 6.84E-06 | 1.12E-04 | Ccl7,20306:up Ccl2,20296:up Cst7,13011:up Cd109,235505:down Ptx3,19288:up Wnt5a,22418:down Ccl12,20293:up Ccl4,20303:up Igf1,16000:up Tgfb2,21808:down Fgfr2,14183:up F3,14066:up Kng1,16644:up Htr2b,15559:down Ccl9,20308:up Ccl6,20305:up Slpi,20568:up Ccl3,20302:up Tfpi2,21789:down Htr2a,15558:down Vegfa,22339:down Serpine2,20720:up Oas3,246727:up Pparg,19016:up Gas6,14456:up Tnf,21926:up Fgfr1,14182:down Ccl8,20307:up Sfrp2,20319:up Serp1g1,12258:up Serpina3g,20715:up Npnt,114249:up                                                                                                                                                                                                                                                                                                                                                                                                                                                                                                                                                                                                                                                                                             |
| positive regulation of endothelial cell migration | GO:0010595  | 6.89E-06 | 1.13E-04 | Prl2c2,18811:up Fgfr1,14182:down Wnt5a,22418:down Ptgs2,19225:down Bmp4,12159:up Srp2,68792:down Vegfa,22339:down Plpp3,67916:up                                                                                                                                                                                                                                                                                                                                                                                                                                                                                                                                                                                                                                                                                                                                                                                                                                                                                                                                                                                                                                                                    |
| regulation of cartilage development               | GO:0061035  | 6.89E-06 | 1.13E-04 | Fam101b,76566:down Loxl2,94352:down Efemp1,216616:up Wnt5a,22418:down Grem1,23892:up Bmp4,12159:up Tgfb2,21808:down Adamts12,239337:down                                                                                                                                                                                                                                                                                                                                                                                                                                                                                                                                                                                                                                                                                                                                                                                                                                                                                                                                                                                                                                                            |
| negative regulation of bone remodeling            | GO:0046851  | 6.90E-06 | 1.13E-04 | Ceacam1,26365:up Sfrp1,20377:up Vegfa,22339:down Tnfrsf11b,18383:up Grem1,23892:up                                                                                                                                                                                                                                                                                                                                                                                                                                                                                                                                                                                                                                                                                                                                                                                                                                                                                                                                                                                                                                                                                                                  |
| negative regulation of embryonic development      | GO:0045992  | 7.10E-06 | 1.16E-04 | Col5a2,12832:down Sfrp2,20319:up Col5a1,12831:down Sulf1,240725:down Wnt5a,22418:down Bmp4,12159:up                                                                                                                                                                                                                                                                                                                                                                                                                                                                                                                                                                                                                                                                                                                                                                                                                                                                                                                                                                                                                                                                                                 |
| positive regulation of stem cell proliferation    | GO:0006648  | 7.14E-06 | 1.16E-04 | Prl2c2,18811:up Fgfr1,14182:down Wnt5a,22418:down Bmpr1a,12166:down Bmp4,12159:up Vegfa,22339:down Cx3cr1,13051:down Fgfr2,14183:up Kitl,17311:up                                                                                                                                                                                                                                                                                                                                                                                                                                                                                                                                                                                                                                                                                                                                                                                                                                                                                                                                                                                                                                                   |
| regulation of fat cell differentiation            | GO:0045598  | 7.42E-06 | 1.20E-04 | Pparg,19016:up Sfrp1,20377:up Wnt5a,22418:down Ptgs2,19225:down Igf1,16000:up Adipoq,11450:up Sfrp2,20319:up Vegfa,22339:down Htr2a,15558:down Medag,70717:down Enpp1,18605:down                                                                                                                                                                                                                                                                                                                                                                                                                                                                                                                                                                                                                                                                                                                                                                                                                                                                                                                                                                                                                    |
| positive regulation of cell division              | GO:0051781  | 7.42E-06 | 1.20E-04 | Htr2b,15559:down Tnf,21926:up Wnt5a,22418:down Pdgfc,54635:down Figf,14205:up Igf1,16000:up Vegfa,22339:down Vegfb,22340:up Tgfb2,21808:down Fgfr2,14183:up Igf2,16002:up                                                                                                                                                                                                                                                                                                                                                                                                                                                                                                                                                                                                                                                                                                                                                                                                                                                                                                                                                                                                                           |
| endothelial cell proliferation                    | GO:00101935 | 7.50E-06 | 1.21E-04 | Htr2b,15559:down Loxl2,94352:down Sulf1,240725:down Wnt5a,22418:down Ccl2,20296:up Aldh1a2,19378:up Bmp4,12159:up Cxcl12,20315:up Vegfa,22339:down F3,14066:up                                                                                                                                                                                                                                                                                                                                                                                                                                                                                                                                                                                                                                                                                                                                                                                                                                                                                                                                                                                                                                      |
| negative regulation of protein metabolic process  | GO:0051248  | 8.02E-06 | 1.28E-04 | Flrt2,399558:down Sfrp4,20379:up Ednrb,13618:up Cst7,13011:up Igfbp3,16009:up Cd109,235505:down Ptx3,19288:up Adipoq,11450:up Bmp4,12159:up Igf1,16000:up Prg4,96875:down Plpp3,67916:up Kng1,16644:up Slpi,20568:up Plat,18791:down Aspn,66695:down Tfpi2,21789:down Ctla2a,13024:down Fabp4,11770:up Vegfa,22339:down Serpine2,20720:up Nxn,18230:down Lrrc15,74488:down Gas6,14456:up Tnf,21926:up Egfr,13649:down Sfrp1,20377:up Grem1,23892:up Ceacam1,26365:up Sfrp2,20319:up Serp1g1,12258:up Serpina3g,20715:up Prkar2b,19088:up Enpp1,18605:down Errfi1,74155:down                                                                                                                                                                                                                                                                                                                                                                                                                                                                                                                                                                                                                         |

|                                                          |            |          |          |                                                                                                                                                                                                                                                                                                                                                                                                                                                                                                                                                                                                                                                                                                                                                                                                                                                                                                                                                                                                                                                                                                                                                                                                                                                                                                                                                                                                                                                                                                                                                                                                                                                                                                                                                                                                                                                                                                                                                                                                                                                                                                                                                                                                                                                                                                                                                                                                                                                                                                                                                                                                                                                                                                                                                                                                                                                                                                                                                                                                                                                                                                                                                                                                                       |
|----------------------------------------------------------|------------|----------|----------|-----------------------------------------------------------------------------------------------------------------------------------------------------------------------------------------------------------------------------------------------------------------------------------------------------------------------------------------------------------------------------------------------------------------------------------------------------------------------------------------------------------------------------------------------------------------------------------------------------------------------------------------------------------------------------------------------------------------------------------------------------------------------------------------------------------------------------------------------------------------------------------------------------------------------------------------------------------------------------------------------------------------------------------------------------------------------------------------------------------------------------------------------------------------------------------------------------------------------------------------------------------------------------------------------------------------------------------------------------------------------------------------------------------------------------------------------------------------------------------------------------------------------------------------------------------------------------------------------------------------------------------------------------------------------------------------------------------------------------------------------------------------------------------------------------------------------------------------------------------------------------------------------------------------------------------------------------------------------------------------------------------------------------------------------------------------------------------------------------------------------------------------------------------------------------------------------------------------------------------------------------------------------------------------------------------------------------------------------------------------------------------------------------------------------------------------------------------------------------------------------------------------------------------------------------------------------------------------------------------------------------------------------------------------------------------------------------------------------------------------------------------------------------------------------------------------------------------------------------------------------------------------------------------------------------------------------------------------------------------------------------------------------------------------------------------------------------------------------------------------------------------------------------------------------------------------------------------------------|
| biological regulation                                    | GO:0065007 | 8.13E-06 | 1.30E-04 | Fstl3,83554:down lgfbp4,16010:up Adm,11535:up Flrt2,399558:down Tmem176b,65963:up Plxnd1,67784:up Tfec,21426:up Sfrp4,20379:up Lyl1,17095:up lgfbp3,16009:up Plk2,20620:down Cd24a,12484:down Il1rn,16181:up Maob,109731:up Bmp4,12159:up Oasl1,231655:up Hpse,15442:up Medag,70717:down Ptgir,19222:up Fgfr2,14183:up Thbs2,21826:down Htr2b,15559:down Dram1,71712:up Ccl6,20305:up Anxa8,11752:down Slpi,20568:up Aspn,66695:down Mt2,17750:up Cxcr6,80901:down Fam132b,227358:down Nabp1,109019:down Phf11a,219131:up Mmp2,17390:down Oas3,246727:up Slc40a1,53945:up Egfr,13649:down C1rb,667277:up Tfrc,22042:up Sncg,20618:up Ccl8,20307:up Serpina3g,20715:up Rspo2,239405:up Fam20a,208659:down Syt13,80976:up Mt1,17748:up Col5a2,12832:down Aldh1a2,19378:up Ccl2,20296:up Ednrb,13618:up Ampd3,11717:up Mmp13,17386:up Htra3,78558:down Tnfrsf12a,27279:down Uchl5,56207:up Clec4n,56620:up Steap1,70358:down Cdo1,12583:up Dok2,13449:up Hvcn1,74096:up Ptx3,19288:up Ncam1,17967:down Ccl4,20303:up Chst11,58250:down Vegfb,22340:up Aldh1a3,56847:down Plpp3,67916:up Lrrc17,74511:down Lama2,16773:down Ccl9,20308:up Ptk7,71461:down Inhba,16323:down Bnc2,242509:down Tfpi2,21789:down Crfl1,12931:down C1s1,50908:up Plod2,26432:down Vegfa,22339:down Serpine2,20720:up Nxn,18230:down lgf2,16002:up Kdelr3,105785:down Tmem176a,66058:up Tnf,21926:up Col1a2,12843:down Fxyd1,56188:up Fgfr1,14182:down Lpl,16956:up Sulf1,240725:down Susd2,71733:up Cd4,12504:up Col3a1,12825:down Tbx15,21384:down Serping1,12258:up Enpp1,18605:down Clec2d,93694:up Hpgd,15446:up C3,12266:up Ankrd1,107765:down Cx3cr1,13051:down Cd109,235505:down Loxl2,94352:down Loxl3,16950:down Trf,22041:up Cxc14,57266:down Wnt5a,22418:down Stc1,20855:up Mark1,226778:up Col8a1,12837:down Adipoq,11450:up lgf1,16000:up Crabp2,12904:down Cxc19,17329:up Tgfb2,21808:down F3,14066:up Clec4e,56619:up Cthrc1,68588:down Kng1,16644:up Pr12c2,18811:up Efemp1,216616:up Dpysl3,22240:down Ninj1,18081:up Saa3,20210:up Vdr,22337:down Pdia5,72599:down Fabp4,11770:up Cxc12,20315:up Htra2a,15558:down Smoc2,64074:down Gas6,14456:up Sfrp1,20377:up C1qtnf3,81799:down Tgfb3,21814:up Fxyd2,11936:up Serinc2,230779:down Ceacam1,26365:up Sfrp2,20319:up Tnfrsf11b,18383:up Prkar2b,19088:up Npnt,114249:up Slc10a1,20193:up lce1,218333:down Ly9,17085:up Ccl7,20306:up Pdgfc,54635:down Mgp,17313:up Figf,14205:up Cst7,13011:up Sema7a,20361:down Epas1,13819:up Slc29a1,63959:up Gpm6b,14758:up Ddah1,69219:down Sdpr,20324:down Postn,50706:down Akr1c18,105349:up Ccl12,20293:up Bmpr1a,12166:down Wisp1,22402:down Ank,11732:down Tnc,21923:down Ret,19713:up Prg4,96875:down Sdf2l1,64136:up Pdxk,216134:up C1s2,317677:up Ifit1,15957:up Creb3l1,26427:down Il1rl1,17082:down Kitl,17311:up Fam101b,76566:down Hp,15439:up Aoh,27052:up Ras11a,68895:up Plat,18791:down Ccl3,20302:up Ctla2a,13024:down Sprx2,68792:down Adamts12,239337:down Lrrc15,74488:down Anpep,16790:up Pparg,19016:up Lmcd1,30937:up Glp1r,14652:down Tnfrsf23,79201:down Hmox1,15368:up Has2,15117:down Ptgs2,19225:down Kcnj15,16516:down Grem1,23892:up Phf11d,219132:up Col5a1,12831:down Errf1,74155:down Tnfsf9,21950:up |
| cellular response to acid chemical                       | GO:0071229 | 8.29E-06 | 1.32E-04 | Col5a2,12832:down Tnf,21926:up Col1a2,12843:down Akr1c18,105349:up Egfr,13649:down Ptk7,71461:down Aldh1a2,19378:up Pdgfc,54635:down Col3a1,12825:down Ret,19713:up Mmp2,17390:down Ptgir,19222:up                                                                                                                                                                                                                                                                                                                                                                                                                                                                                                                                                                                                                                                                                                                                                                                                                                                                                                                                                                                                                                                                                                                                                                                                                                                                                                                                                                                                                                                                                                                                                                                                                                                                                                                                                                                                                                                                                                                                                                                                                                                                                                                                                                                                                                                                                                                                                                                                                                                                                                                                                                                                                                                                                                                                                                                                                                                                                                                                                                                                                    |
| cellular response to oxygen-containing compound          | GO:1901701 | 8.55E-06 | 1.36E-04 | Htra2b,15559:down Col5a2,12832:down Mrc1,17533:up Ptk7,71461:down Inhba,16323:down Ccl7,20306:up Ccl2,20296:up Aldh1a2,19378:up Pdgfc,54635:down Ankrd1,107765:down Vdr,22337:down Postn,50706:down Mmp2,17390:down lgf2,16002:up Gas6,14456:up Pparg,19016:up Tnf,21926:up Col1a2,12843:down Akr1c18,105349:up Egfr,13649:down Sfrp1,20377:up Ccl12,20293:up Col3a1,12825:down Adipoq,11450:up Bmp4,12159:up lgf1,16000:up Ret,19713:up Ptgir,19222:up Enpp1,18605:down Mt1,17748:up                                                                                                                                                                                                                                                                                                                                                                                                                                                                                                                                                                                                                                                                                                                                                                                                                                                                                                                                                                                                                                                                                                                                                                                                                                                                                                                                                                                                                                                                                                                                                                                                                                                                                                                                                                                                                                                                                                                                                                                                                                                                                                                                                                                                                                                                                                                                                                                                                                                                                                                                                                                                                                                                                                                                 |
| cellular ion homeostasis                                 | GO:0006873 | 8.80E-06 | 1.39E-04 | Htra2b,15559:down Kng1,16644:up Adm,11535:up Ccl2,20296:up Ednrb,13618:up Ccl3,20302:up Mt2,17750:up Vdr,22337:down Fam132b,227358:down Htra2a,15558:down Slc40a1,53945:up Glp1r,14652:down Trf,22041:up Fxyd1,56188:up Cd24a,12484:down Hmox1,15368:up Cd4,12504:up Stc1,20855:up Tfrc,22042:up Bmp4,12159:up Tgfb2,21808:down Ptgir,19222:up Enpp1,18605:down Mt1,17748:up                                                                                                                                                                                                                                                                                                                                                                                                                                                                                                                                                                                                                                                                                                                                                                                                                                                                                                                                                                                                                                                                                                                                                                                                                                                                                                                                                                                                                                                                                                                                                                                                                                                                                                                                                                                                                                                                                                                                                                                                                                                                                                                                                                                                                                                                                                                                                                                                                                                                                                                                                                                                                                                                                                                                                                                                                                          |
| positive regulation of transferase activity              | GO:0051347 | 8.81E-06 | 1.39E-04 | Htra2b,15559:down Pdgfc,54635:down Vegfa,22339:down Htra2a,15558:down lgf2,16002:up Gas6,14456:up Tnf,21926:up Trf,22041:up Cd24a,12484:down Egfr,13649:down Fgfr1,14182:down Wnt5a,22418:down Cd4,12504:up Il1rn,16181:up Grem1,23892:up Serinc2,230779:down Adipoq,11450:up Bmp4,12159:up lgf1,16000:up Ceacam1,26365:up Tgfb2,21808:down Kitl,17311:up                                                                                                                                                                                                                                                                                                                                                                                                                                                                                                                                                                                                                                                                                                                                                                                                                                                                                                                                                                                                                                                                                                                                                                                                                                                                                                                                                                                                                                                                                                                                                                                                                                                                                                                                                                                                                                                                                                                                                                                                                                                                                                                                                                                                                                                                                                                                                                                                                                                                                                                                                                                                                                                                                                                                                                                                                                                             |
| regulation of chemotaxis                                 | GO:0050920 | 8.90E-06 | 1.40E-04 | Gas6,14456:up Cxc14,57266:down Fgfr1,14182:down Plxnd1,67784:up Wnt5a,22418:down Ccl2,20296:up Ccl12,20293:up Figf,14205:up Grem1,23892:up Ccl4,20303:up Cxc19,17329:up Cxc12,20315:up Vegfa,22339:down                                                                                                                                                                                                                                                                                                                                                                                                                                                                                                                                                                                                                                                                                                                                                                                                                                                                                                                                                                                                                                                                                                                                                                                                                                                                                                                                                                                                                                                                                                                                                                                                                                                                                                                                                                                                                                                                                                                                                                                                                                                                                                                                                                                                                                                                                                                                                                                                                                                                                                                                                                                                                                                                                                                                                                                                                                                                                                                                                                                                               |
| protein metabolic process                                | GO:0019538 | 9.28E-06 | 1.46E-04 | lgfbp4,16010:up Flrt2,399558:down Sfrp4,20379:up C3,12266:up Serpinh1,12406:down lgfbp3,16009:up Cd109,235505:down Ggt5,23887:up Loxl2,94352:down Plk2,20620:down Trf,22041:up Cd24a,12484:down Adam12,11489:down Mme,17380:up Fkbp14,231997:down Wnt5a,22418:down Mark1,226778:up Il1rn,16181:up Adipoq,11450:up Bmp4,12159:up lgf1,16000:up Tgfb2,21808:down Hpse,15442:up F3,14066:up Fgfr2,14183:up Adamts4,240913:down Htra2b,15559:down Kng1,16644:up Efemp1,216616:up Ccl6,20305:up Slpi,20568:up Aspn,66695:down Saa3,20210:up Pdia5,72599:down Fabp4,11770:up Htra2a,15558:down Mmp2,17390:down Pappa,18491:down Gas6,14456:up Egfr,13649:down Col11a1,12814:down Sfrp1,20377:up C1qtnf3,81799:down Tgfb3,21814:up C1rb,667277:up Tl1,21892:down Ceacam1,26365:up Ccl8,20307:up Sfrp2,20319:up Pamr1,210622:up Serpina3g,20715:up Fam20a,208659:down Npnt,114249:up Tnfrsf11b,18383:up Prkar2b,19088:up Neur3,214854:down Ccl2,20296:up Ccl7,20306:up Pdzn3,55983:down Pdgfc,54635:down Cst7,13011:up Ednrb,13618:up Mmp13,17386:up Sema7a,20361:down Htra3,78558:down Uchl5,56207:up Ddah1,69219:down Fkbp10,14230:down Dok2,13449:up Man2a2,140481:up Mamdc2,71738:down Ptx3,19288:up Bmpr1a,12166:down Ccl12,20293:up Ccl4,20303:up Klk1b11,16613:up Chst11,58250:down Ret,19713:up Prg4,96875:down Vegfb,22340:up Sdf2l1,64136:up C1s2,317677:up Plpp3,67916:up Kitl,17311:up P4ha1,18451:down Hp,15439:up Ccl9,20308:up Inhba,16323:down Plat,18791:down Ccl3,20302:up Tfpi2,21789:down Ctla2a,13024:down Crfl1,12931:down C1s1,50908:up Vegfa,22339:down Serpine2,20720:up Adamts12,239337:down Lrrc15,74488:down Nxn,18230:down lgf2,16002:up Anpep,16790:up Pparg,19016:up Tnf,21926:up Fgfr1,14182:down Sulf1,240725:down Cd4,12504:up Grem1,23892:up Col3a1,12825:down Serping1,12258:up Errf1,74155:down Enpp1,18605:down                                                                                                                                                                                                                                                                                                                                                                                                                                                                                                                                                                                                                                                                                                                                                                                                                                                                                                                                                                                                                                                                                                                                                                                                                                                                                                                                                                         |
| positive regulation of kinase activity                   | GO:0033674 | 9.43E-06 | 1.48E-04 | Htra2b,15559:down Pdgfc,54635:down Vegfa,22339:down Htra2a,15558:down Gas6,14456:up Tnf,21926:up Trf,22041:up Cd24a,12484:down Egfr,13649:down Fgfr1,14182:down Wnt5a,22418:down Cd4,12504:up Il1rn,16181:up Grem1,23892:up Adipoq,11450:up Bmp4,12159:up lgf1,16000:up Ceacam1,26365:up Tgfb2,21808:down Kitl,17311:up                                                                                                                                                                                                                                                                                                                                                                                                                                                                                                                                                                                                                                                                                                                                                                                                                                                                                                                                                                                                                                                                                                                                                                                                                                                                                                                                                                                                                                                                                                                                                                                                                                                                                                                                                                                                                                                                                                                                                                                                                                                                                                                                                                                                                                                                                                                                                                                                                                                                                                                                                                                                                                                                                                                                                                                                                                                                                               |
| establishment of planar polarity of embryonic epithelium | GO:0042249 | 9.64E-06 | 1.51E-04 | Cthrc1,68588:down Sfrp2,20319:up Sfrp1,20377:up Ptk7,71461:down Wnt5a,22418:down                                                                                                                                                                                                                                                                                                                                                                                                                                                                                                                                                                                                                                                                                                                                                                                                                                                                                                                                                                                                                                                                                                                                                                                                                                                                                                                                                                                                                                                                                                                                                                                                                                                                                                                                                                                                                                                                                                                                                                                                                                                                                                                                                                                                                                                                                                                                                                                                                                                                                                                                                                                                                                                                                                                                                                                                                                                                                                                                                                                                                                                                                                                                      |

|                                                                 |            |          |          |                                                                                                                                                                                                                                                                                                                                                                                                                                                                                                            |
|-----------------------------------------------------------------|------------|----------|----------|------------------------------------------------------------------------------------------------------------------------------------------------------------------------------------------------------------------------------------------------------------------------------------------------------------------------------------------------------------------------------------------------------------------------------------------------------------------------------------------------------------|
| positive regulation of developmental growth                     | GO:0048639 | 1.01E-05 | 1.58E-04 | Fgfr1,14182:down Ncam1,17967:down Bmpr1a,12166:down C3,12266:up Wisp1,22402:down Sema7a,20361:down Igf1,16000:up Tnfrsf12a,27279:down Crabp2,12904:down Cxcl12,20315:up Vegfa,22339:down Fgfr2,14183:up Igf2,16002:up                                                                                                                                                                                                                                                                                      |
| positive regulation of cytokine secretion                       | GO:0050715 | 1.09E-05 | 1.70E-04 | Htr2b,15559:down Tnf,21926:up Lpl,16956:up C1qtnf3,81799:down Wnt5a,22418:down Ccl3,20302:up Clec4n,56620:up Postn,50706:down Clec4e,56619:up Il1r1,17082:down                                                                                                                                                                                                                                                                                                                                             |
| regulation of BMP signaling pathway                             | GO:0030510 | 1.11E-05 | 1.72E-04 | Fstl3,83554:down Sfrp1,20377:up Sulf1,240725:down Wnt5a,22418:down Tgfb3,21814:up Grem1,23892:up Bmp4,12159:up Htra3,78558:down Sfrp2,20319:up                                                                                                                                                                                                                                                                                                                                                             |
| negative regulation of cellular protein metabolic process       | GO:0032269 | 1.13E-05 | 1.75E-04 | Flrt2,399558:down Sfrp4,20379:up Ednrb,13618:up Cst7,13011:up Igf1,16000:up Adipoq,11450:up Bmp4,12159:up Ppp3,67916:up Kng1,16644:up Slpi,20568:up Plat,18791:down Aspn,66695:down Tfpi2,21789:down Ctla2a,13024:down Fabp4,11770:up Vegfa,22339:down Serpine2,20720:up Nxn,18230:down Lrrc15,74488:down Gas6,14456:up Tnf,21926:up Egfr,13649:down Sfrp1,20377:up Grem1,23892:up Ceacam1,26365:up Sfrp2,20319:up Serping1,12258:up Serpina3g,20715:up Prkar2b,19088:up Enpp1,18605:down Errf1,74155:down |
| cellular chemical homeostasis                                   | GO:0055082 | 1.18E-05 | 1.81E-04 | Htr2b,15559:down Kng1,16644:up Adm,11535:up Ccl2,20296:up Ednrb,13618:up Ccl3,20302:up Mt2,17750:up Vdr,22337:down Fam132b,227358:down Htra2a,15558:down Slc40a1,53945:up Gas6,14456:up Glp1r,14652:down Fxyd1,56188:up Trf,22041:up Cd24a,12484:down Hmox1,15368:up C1qtnf3,81799:down Ccl4,12504:up Stc1,20855:up Tfrc,22042:up Bmp4,12159:up Igf1,16000:up Tgfb2,21808:down Ptgir,19222:up Enpp1,18605:down Mt1,17748:up                                                                                |
| negative regulation of catalytic activity                       | GO:0043086 | 1.18E-05 | 1.81E-04 | Kng1,16644:up Flrt2,399558:down Hp,15439:up Slpi,20568:up Cst7,13011:up Aspn,66695:down Tfpi2,21789:down Fabp4,11770:up Vegfa,22339:down Serpine2,20720:up Cd109,235505:down Lrrc15,74488:down Tnf,21926:up Gas6,14456:up Pparg,19016:up Ptx3,19288:up Sfrp1,20377:up Adipoq,11450:up Bmp4,12159:up Igf1,16000:up Ceacam1,26365:up Sfrp2,20319:up Serping1,12258:up Serpina3g,20715:up Tgfb2,21808:down Prkar2b,19088:up Errf1,74155:down                                                                  |
| positive regulation of protein serine/threonine kinase activity | GO:0071902 | 1.21E-05 | 1.85E-04 | Htr2b,15559:down Tnf,21926:up Trf,22041:up Fgfr1,14182:down Egfr,13649:down Cd24a,12484:down Wnt5a,22418:down Pdgfr,54635:down Il1r1,16181:up Igf1,16000:up Adipoq,11450:up Ceacam1,26365:up Vegfa,22339:down Htra2a,15558:down Kitl,17311:up                                                                                                                                                                                                                                                              |
| skin development                                                | GO:0043588 | 1.28E-05 | 1.95E-04 | Col5a2,12832:down Tnf,21926:up Col1a2,12843:down Egfr,13649:down Inhba,16323:down Ptgs2,19225:down Col3a1,12825:down Vdr,22337:down Col5a1,12831:down Tgfb2,21808:down Hspse,15442:up Cdsn,386463:up Cd109,235505:down Errf1,74155:down Fgfr2,14183:up                                                                                                                                                                                                                                                     |
| positive regulation of peptidyl-tyrosine phosphorylation        | GO:0050731 | 1.28E-05 | 1.95E-04 | Gas6,14456:up Cd24a,12484:down Cd4,12504:up Grem1,23892:up Igf1,16000:up Adipoq,11450:up Crif1,12931:down Vegfa,22339:down Htra2a,15558:down Ppp3,67916:up Igf2,16002:up Kitl,17311:up                                                                                                                                                                                                                                                                                                                     |
| stem cell differentiation                                       | GO:0048863 | 1.30E-05 | 1.98E-04 | Fam101b,76566:down Htr2b,15559:down Aldh1a2,19378:up Ednrb,13618:up Sema7a,20361:down Loxl2,94352:down Loxl3,16950:down Fgfr1,14182:down Sfrp1,20377:up Has2,15117:down Wnt5a,22418:down Tgfb3,21814:up Bmpr1a,12166:down Grem1,23892:up Bmp4,12159:up Sfrp2,20319:up Ret,19713:up Tgfb2,21808:down Fgfr2,14183:up Kitl,17311:up                                                                                                                                                                           |
| acute inflammatory response                                     | GO:0002526 | 1.31E-05 | 1.98E-04 | Tnf,21926:up Pparg,19016:up Hp,15439:up C3,12266:up Ptgs2,19225:down Il1r1,16181:up Ednrb,13618:up Saa3,20210:up Serping1,12258:up F3,14066:up                                                                                                                                                                                                                                                                                                                                                             |
| negative regulation of chondrocyte differentiation              | GO:0032331 | 1.31E-05 | 1.99E-04 | Fam101b,76566:down Efemp1,216616:up Adamts12,239337:down Grem1,23892:up Bmp4,12159:up                                                                                                                                                                                                                                                                                                                                                                                                                      |
| sprouting angiogenesis                                          | GO:0002040 | 1.32E-05 | 1.99E-04 | Prl2c2,18811:up Loxl2,94352:down Ptgs2,19225:down Grem1,23892:up Bmp4,12159:up Ceacam1,26365:up Srxp2,68792:down Vegfa,22339:down                                                                                                                                                                                                                                                                                                                                                                          |
| cell-type specific apoptotic process                            | GO:0097285 | 1.33E-05 | 2.00E-04 | Sfrp4,20379:up Ccl3,20302:up Crif1,12931:down Cxcl12,20315:up Igf1,16000:up Adipoq,11450:up Tnf,21926:up Glp1r,14652:down Akr1c18,105349:up Cd24a,12484:down Hmox1,15368:up Sfrp1,20377:up Wnt5a,22418:down Ccl12,20293:up Adipoq,11450:up Bmp4,12159:up Igf1,16000:up Ceacam1,26365:up Sfrp2,20319:up Tgfb2,21808:down Fgfr2,14183:up Kitl,17311:up Mt1,17748:up                                                                                                                                          |
| positive regulation of epidermis development                    | GO:0045684 | 1.36E-05 | 2.04E-04 | Vdr,22337:down Tnf,21926:up Tgfb2,21808:down Sfrp4,20379:up Hspse,15442:up Bmp4,12159:up                                                                                                                                                                                                                                                                                                                                                                                                                   |
| negative regulation of leukocyte differentiation                | GO:0002106 | 1.36E-05 | 2.04E-04 | Fstl3,83554:down Tmem176a,66058:up Clec2d,93694:up Lrrc17,74511:down Tmem176b,65963:up Sfrp1,20377:up Bmp4,12159:up Adipoq,11450:up Ceacam1,26365:up                                                                                                                                                                                                                                                                                                                                                       |
| regulation of hemopoiesis                                       | GO:0003706 | 1.42E-05 | 2.11E-04 | Fstl3,83554:down Clec2d,93694:up Lrrc17,74511:down Tmem176b,65963:up Inhba,16323:down Ccl3,20302:up Ctla2a,13024:down Vegfa,22339:down Gas6,14456:up Tnf,21926:up Tmem176a,66058:up Cd24a,12484:down Sfrp1,20377:up Adipoq,11450:up Bmp4,12159:up Ceacam1,26365:up Tnfsf9,21950:up Kitl,17311:up                                                                                                                                                                                                           |
| regulation of developmental growth                              | GO:0048638 | 1.42E-05 | 2.11E-04 | Plxnd1,67784:up C3,12266:up Sema7a,20361:down Tnfrsf12a,27279:down Cxcl12,20315:up Vegfa,22339:down Igf2,16002:up Fgfr1,14182:down Sfrp1,20377:up Ncam1,17967:down Wnt5a,22418:down Bmpr1a,12166:down Wisp1,22402:down Bmp4,12159:up Igf1,16000:up Sfrp2,20319:up Crabp2,12904:down Fgfr2,14183:up                                                                                                                                                                                                         |
| regulation of endothelial cell migration                        | GO:0010594 | 1.43E-05 | 2.12E-04 | Prl2c2,18811:up Fgfr1,14182:down Wnt5a,22418:down Ptgs2,19225:down Stc1,20855:up Bmp4,12159:up Ceacam1,26365:up Srxp2,68792:down Vegfa,22339:down Ppp3,67916:up                                                                                                                                                                                                                                                                                                                                            |
| regulation of extrinsic apoptotic signaling pathway             | GO:0001236 | 1.47E-05 | 2.17E-04 | Tnf,21926:up Tnfrsf23,79201:down Fgfr1,14182:down Sfrp1,20377:up Hmox1,15368:up Inhba,16323:down Igf1,16000:up Bmp4,12159:up Tnfrsf12a,27279:down Sfrp2,20319:up Tgfb2,21808:down Cx3cr1,13051:down                                                                                                                                                                                                                                                                                                        |
| coronary vasculature development                                | GO:0060976 | 1.49E-05 | 2.21E-04 | Fgfr1,14182:down Plxnd1,67784:up Ptk7,71461:down Tgfb3,21814:up Bmp4,12159:up Vegfb,22340:up Vegfa,22339:down Fgfr2,14183:up                                                                                                                                                                                                                                                                                                                                                                               |
| regulation of endothelial cell proliferation                    | GO:0001936 | 1.51E-05 | 2.23E-04 | Htr2b,15559:down Sulf1,240725:down Wnt5a,22418:down Ccl2,20296:up Aldh1a2,19378:up Bmp4,12159:up Cxcl12,20315:up Vegfa,22339:down F3,14066:up                                                                                                                                                                                                                                                                                                                                                              |
| divalent inorganic cation homeostasis                           | GO:0072507 | 1.64E-05 | 2.41E-04 | Htr2b,15559:down Kng1,16644:up Adm,11535:up Ccl2,20296:up Ednrb,13618:up Ccl3,20302:up Mt2,17750:up Vdr,22337:down Htra2a,15558:down Fxyd1,56188:up Glp1r,14652:down Cd24a,12484:down Egfr,13649:down Cd4,12504:up Stc1,20855:up Bmp4,12159:up Tgfb2,21808:down Fam20a,208659:down Ptgir,19222:up Mt1,17748:up                                                                                                                                                                                             |
| positive regulation of cardiac muscle tissue growth             | GO:0055023 | 1.66E-05 | 2.43E-04 | Fgfr1,14182:down Ncam1,17967:down Bmpr1a,12166:down Wisp1,22402:down Fgfr2,14183:up Igf1,16000:up                                                                                                                                                                                                                                                                                                                                                                                                          |

|                                                    |            |          |          |                                                                                                                                                                                                                                                                                                                                                                                                                                                                                                                                                                                                                                                                                                                                                                                                                                                                                                                                                                  |
|----------------------------------------------------|------------|----------|----------|------------------------------------------------------------------------------------------------------------------------------------------------------------------------------------------------------------------------------------------------------------------------------------------------------------------------------------------------------------------------------------------------------------------------------------------------------------------------------------------------------------------------------------------------------------------------------------------------------------------------------------------------------------------------------------------------------------------------------------------------------------------------------------------------------------------------------------------------------------------------------------------------------------------------------------------------------------------|
| positive regulation of calcium-mediated signaling  | GO:0050850 | 1.66E-05 | 2.43E-04 | Lmcd1,30937:up Cd24a,12484:down Ncam1,17967:down Cd4,12504:up Ccl4,20303:up Igf1,16000:up                                                                                                                                                                                                                                                                                                                                                                                                                                                                                                                                                                                                                                                                                                                                                                                                                                                                        |
| response to inorganic substance                    | GO:0010035 | 1.69E-05 | 2.46E-04 | Hp,15439:up Mt2,17750:up Sord,20322:up Fabp4,11770:up Mmp2,17390:down Slc40a1,53945:up Pparg,19016:up Tnf,21926:up Loxl2,94352:down Trf,22041:up Hvcn1,74096:up Akr1c18,105349:up Egfr,13649:down Hmox1,15368:up Ncam1,17967:down Tfrc,22042:up Gatm,67092:down Mt1,17748:up                                                                                                                                                                                                                                                                                                                                                                                                                                                                                                                                                                                                                                                                                     |
| positive regulation of nucleocytoplasmic transport | GO:0046824 | 1.70E-05 | 2.47E-04 | Tnf,21926:up Gas6,14456:up Egfr,13649:down Bmpr1a,12166:down Ptgs2,19225:down Grem1,23892:up Igf1,16000:up Bmp4,12159:up Ceacam1,26365:up Sfrp2,20319:up                                                                                                                                                                                                                                                                                                                                                                                                                                                                                                                                                                                                                                                                                                                                                                                                         |
| cell-substrate adhesion                            | GO:0031589 | 1.74E-05 | 2.53E-04 | Ninj1,18081:up Tnfrsf12a,27279:down Gpm6b,14758:up Sned1,20877:up Postn,50706:down Vegfa,22339:down Adamts12,239337:down Smoc2,64074:down Gas6,14456:up Sfrp1,20377:up Has2,15117:down Grem1,23892:up Col8a1,12837:down Col3a1,12825:down Hpse,15442:up Npnt,114249:up                                                                                                                                                                                                                                                                                                                                                                                                                                                                                                                                                                                                                                                                                           |
| nervous system development                         | GO:0007399 | 1.76E-05 | 2.53E-04 | Adm,11535:up Flrt2,399558:down Plxnd1,67784:up Ccl2,20296:up Aldh1a2,19378:up Figf,14205:up Ednr,13618:up Sema7a,20361:down Ankrd1,107765:down Tnfrsf12a,27279:down Uchl5,56207:up Shroom4,208431:down Postn,50706:down Cx3cr1,13051:down Plk2,20620:down Trf,22041:up Cd24a,12484:down Ncam1,17967:down Wnt5a,22418:down Bmpr1a,12166:down Ccl12,20293:up Mark1,226778:up Bmp4,12159:up Igf1,16000:up Crabp2,12904:down Tnc,21923:down Ret,19713:up Tgfb2,21808:down Aldh1a3,56847:down Ppp3,67916:up Fgfr2,14183:up Thbs2,21826:down Cthrc1,68588:down Prll2c2,18811:up Lama2,16773:down Efemp1,216616:up Ptk7,1461:down Inhba,16323:down Dpysl3,22240:down Ccl3,20302:up Srxp2,68792:down Cxcl12,20315:up Vegfa,22339:down Mmp2,17390:down Serpine2,20720:up Pparg,19016:up Gas6,14456:up Tnf,21926:up Fgfr1,14182:down Egfr,13649:down Sfrp1,20377:up Sulf1,240725:down Col3a1,12825:down Sfrp2,20319:up Pcdh19,279653:down Mcoln3,171166:up Rspo2,239405:up |
| regulation of ion transport                        | GO:0043269 | 1.76E-05 | 2.53E-04 | Sfrp4,20379:up Vdr,22337:down Gpm6b,14758:up Fam132b,227358:down Cxcl12,20315:up Htr2a,15558:down Serpine2,20720:up Tnf,21926:up Glp1r,14652:down Hvcn1,74096:up Fxyd1,56188:up Cd4,12504:up Ccl12,20293:up Ptgs2,19225:down Il1rn,16181:up Stc1,20855:up Kcnj15,16516:down Fxyd2,11936:up Ccl4,20303:up Snycg,20618:up Maob,109731:up Bmp4,12159:up Igf1,16000:up Tgfb2,21808:down S100a1,20193:up                                                                                                                                                                                                                                                                                                                                                                                                                                                                                                                                                              |
| regulation of anion transport                      | GO:0044070 | 1.78E-05 | 2.55E-04 | Tnf,21926:up Fxyd1,56188:up Sfrp4,20379:up Stc1,20855:up Il1rn,16181:up Snycg,20618:up Maob,109731:up Gpm6b,14758:up Fam132b,227358:down Cxcl12,20315:up Htr2a,15558:down                                                                                                                                                                                                                                                                                                                                                                                                                                                                                                                                                                                                                                                                                                                                                                                        |
| cellular cation homeostasis                        | GO:0030003 | 1.81E-05 | 2.58E-04 | Htr2b,15559:down Kng1,16644:up Adm,11535:up Ccl2,20296:up Ednr,13618:up Ccl3,20302:up Mt2,17750:up Vdr,22337:down Fam132b,227358:down Htr2a,15558:down Slc40a1,53945:up Glp1r,14652:down Trf,22041:up Fxyd1,56188:up Cd24a,12484:down Hmox1,15368:up Cd4,12504:up Stc1,20855:up Tfrc,22042:up Bmp4,12159:up Tgfb2,21808:down Ptgir,19222:up Mt1,17748:up                                                                                                                                                                                                                                                                                                                                                                                                                                                                                                                                                                                                         |
| positive regulation of ossification                | GO:0045778 | 1.84E-05 | 2.63E-04 | Cthrc1,68588:down Wnt5a,22418:down Bmpr1a,12166:down Igf1,16000:up Bmp4,12159:up Gpm6b,14758:up Sfrp2,20319:up Vegfa,22339:down Npnt,114249:up                                                                                                                                                                                                                                                                                                                                                                                                                                                                                                                                                                                                                                                                                                                                                                                                                   |
| positive regulation of leukocyte migration         | GO:0002687 | 1.85E-05 | 2.63E-04 | Gas6,14456:up Cxcl14,57266:down Wnt5a,22418:down Ccl2,20296:up Ccl12,20293:up Figf,14205:up Ccl4,20303:up Cxcl9,17329:up Cxcl12,20315:up Kitl,17311:up                                                                                                                                                                                                                                                                                                                                                                                                                                                                                                                                                                                                                                                                                                                                                                                                           |
| neutrophil chemotaxis                              | GO:0030593 | 1.89E-05 | 2.69E-04 | Ccl9,20308:up Ccl6,20305:up Ccl7,20306:up Ccl2,20296:up Ccl12,20293:up Ccl4,20303:up Ccl3,20302:up Ccl8,20307:up                                                                                                                                                                                                                                                                                                                                                                                                                                                                                                                                                                                                                                                                                                                                                                                                                                                 |
| regulation of epithelial cell differentiation      | GO:0030856 | 1.92E-05 | 2.72E-04 | Tnf,21926:up Sfrp4,20379:up Bmp4,12159:up Adipoq,11450:up Ceacam1,26365:up Vdr,22337:down Vegfa,22339:down Tgfb2,21808:down Cd109,235505:down Errf1,74155:down Kitl,17311:up                                                                                                                                                                                                                                                                                                                                                                                                                                                                                                                                                                                                                                                                                                                                                                                     |
| gastrulation                                       | GO:0007369 | 1.92E-05 | 2.72E-04 | Col5a2,12832:down Fgfr1,14182:down Sfrp1,20377:up Wnt5a,22418:down Inhba,16323:down Bmpr1a,12166:down Il1rn,16181:up Bmp4,12159:up Adipoq,11450:up Sfrp2,20319:up Col5a1,12831:down Ppp3,67916:up                                                                                                                                                                                                                                                                                                                                                                                                                                                                                                                                                                                                                                                                                                                                                                |
| embryo development                                 | GO:0009790 | 1.92E-05 | 2.72E-04 | Col5a2,12832:down Adm,11535:up Aldh1a2,19378:up Pdgfc,54635:down Epas1,13819:up Wnt5a,22418:down Bmpr1a,12166:down Il1rn,16181:up Adipoq,11450:up Bmp4,12159:up Igf1,16000:up Chst1,58250:down Crabp2,12904:down Ret,19713:up Tgfb2,21808:down Aldh1a3,56847:down Ppp3,67916:up Fgfr2,14183:up Kitl,17311:up Cthrc1,68588:down Htr2b,15559:down Lama2,16773:down Ptk7,1461:down Gjb5,14622:down Inhba,16323:down Vegfa,22339:down Col11a1,12814:down Egfr,13649:down Fgfr1,14182:down Sfrp1,20377:up Sulf1,240725:down Tgfb3,21814:up Grem1,23892:up Sfrp2,20319:up Col5a1,12831:down Tbx15,21384:down Rspo2,239405:up                                                                                                                                                                                                                                                                                                                                           |
| immune effector process                            | GO:0002252 | 2.01E-05 | 2.82E-04 | Clec2d,93694:up Ly9,17085:up Ccl2,20296:up C3,12266:up Ifit3,15959:up Sema7a,20361:down C1s1,50908:up Cx3cr1,13051:down Oas3,246727:up Igf2,16002:up Tnf,21926:up Ptx3,19288:up Lmcd1,30937:up Cd24a,12484:down Hmox1,15368:up Wnt5a,22418:down C1rb,667277:up Tfrc,22042:up Ceacam1,26365:up Cxcl9,17329:up Serping1,12258:up Oasl1,231655:up Tgfb2,21808:down C1s2,317677:up Ifit1,15957:up Clec4e,56619:up                                                                                                                                                                                                                                                                                                                                                                                                                                                                                                                                                    |
| positive regulation of chemotaxis                  | GO:0050921 | 2.01E-05 | 2.82E-04 | Gas6,14456:up Cxcl14,57266:down Fgfr1,14182:down Wnt5a,22418:down Ccl2,20296:up Figf,14205:up Ccl4,20303:up Cxcl9,17329:up Cxcl12,20315:up Vegfa,22339:down                                                                                                                                                                                                                                                                                                                                                                                                                                                                                                                                                                                                                                                                                                                                                                                                      |
| cellular response to iron ion                      | GO:0071281 | 2.01E-05 | 2.82E-04 | Trf,22041:up Hmox1,15368:up Tfrc,22042:up Slc40a1,53945:up                                                                                                                                                                                                                                                                                                                                                                                                                                                                                                                                                                                                                                                                                                                                                                                                                                                                                                       |
| regulation of protein autophosphorylation          | GO:0031952 | 2.02E-05 | 2.82E-04 | Vegfa,22339:down Pdgfc,54635:down Errf1,74155:down Enpp1,18605:down Grem1,23892:up Adipoq,11450:up                                                                                                                                                                                                                                                                                                                                                                                                                                                                                                                                                                                                                                                                                                                                                                                                                                                               |
| cellular response to metal ion                     | GO:0071248 | 2.03E-05 | 2.84E-04 | Pparg,19016:up Akr1c18,105349:up Hvcn1,74096:up Trf,22041:up Hmox1,15368:up Tfrc,22042:up Fabp4,11770:up Mt1,17748:up Slc40a1,53945:up                                                                                                                                                                                                                                                                                                                                                                                                                                                                                                                                                                                                                                                                                                                                                                                                                           |
| small molecule metabolic process                   | GO:0044281 | 2.06E-05 | 2.86E-04 | Igf1,16010:up Adm,11535:up Hpgd,15446:up Aldh1a2,19378:up C3,12266:up Ampd3,11717:up Enpp5,83965:up Marc1,66112:up Sord,20322:up Ddah1,69219:down Npl,74091:up Igf1,16000:up Enpp3,209558:down Man2a2,140481:up Cdo1,12583:up Mamdc2,71738:down Ggt5,23887:up Akr1c18,105349:up Fabp5,16592:up Mme,17380:up Wnt5a,22418:down Adipoq,11450:up Hal,15109:up Igf1,16000:up Chst1,58250:down Crabp2,12904:down Gatm,67092:down Pdxk,216134:up Hpse,15442:up Aldh1a3,56847:down Ptgir,19222:up P4ha1,18451:down Htr2b,15559:down Vdr,22337:down Fabp4,11770:up Fam132b,227358:down Vegfa,22339:down Htr2a,15558:down Gfpt2,14584:down Cbr2,12409:up Igf2,16002:up Pparg,19016:up Tnf,21926:up Fgfr1,14182:down Lpl,16956:up Sulf1,240725:down C1qtnf3,81799:down Ptgs2,19225:down Serinc2,230779:down Prkar2b,19088:up Uck2,80914:down Enpp1,18605:down                                                                                                               |
| negative regulation of prostatic bud formation     | GO:0060686 | 2.31E-05 | 3.17E-04 | Sulf1,240725:down Wnt5a,22418:down Bmp4,12159:up                                                                                                                                                                                                                                                                                                                                                                                                                                                                                                                                                                                                                                                                                                                                                                                                                                                                                                                 |
| negative regulation of odontogenesis               | GO:0042483 | 2.31E-05 | 3.17E-04 | Rspo2,239405:up Tnfrsf11b,18383:up Aspn,66695:down                                                                                                                                                                                                                                                                                                                                                                                                                                                                                                                                                                                                                                                                                                                                                                                                                                                                                                               |



|                                                            |            |          |          |                                                                                                                                                                                                                                                                                                                                                                                                                                                                                                                                                                                                                                                                                                                                                                                                                                                                                                                                                                                                                                                                                                                                                                         |
|------------------------------------------------------------|------------|----------|----------|-------------------------------------------------------------------------------------------------------------------------------------------------------------------------------------------------------------------------------------------------------------------------------------------------------------------------------------------------------------------------------------------------------------------------------------------------------------------------------------------------------------------------------------------------------------------------------------------------------------------------------------------------------------------------------------------------------------------------------------------------------------------------------------------------------------------------------------------------------------------------------------------------------------------------------------------------------------------------------------------------------------------------------------------------------------------------------------------------------------------------------------------------------------------------|
| regulation of protein serine/threonine kinase activity     | GO:0071900 | 2.36E-05 | 3.24E-04 | Htr2b,15559:down Pdgfc,54635:down Vegfa,22339:down Htr2a,15558:down Tnf,21926:up Trf,22041:up Cd24a,12484:down Egfr,13649:down Fgfr1,14182:down Sfrp1,20377:up Wnt5a,22418:down Il1rn,16181:up Adipoq,11450:up Bmp4,12159:up Igf1,16000:up Ceacam1,26365:up Sfrp2,20319:up Prkar2b,19088:up Kitl,17311:up                                                                                                                                                                                                                                                                                                                                                                                                                                                                                                                                                                                                                                                                                                                                                                                                                                                               |
| regulation of stem cell proliferation                      | GO:0072091 | 2.37E-05 | 3.24E-04 | Prl2c2,18811:up Fgfr1,14182:down Cd24a,12484:down Wnt5a,22418:down Bmpr1a,12166:down Bmp4,12159:up Vegfa,22339:down Cx3cr1,13051:down Fgfr2,14183:up Kitl,17311:up                                                                                                                                                                                                                                                                                                                                                                                                                                                                                                                                                                                                                                                                                                                                                                                                                                                                                                                                                                                                      |
| positive regulation of muscle organ development            | GO:0048636 | 2.38E-05 | 3.24E-04 | Fgfr1,14182:down Ncam1,17967:down Bmpr1a,12166:down Wisp1,22402:down Grem1,23892:up Igf1,16000:up Bmp4,12159:up Fgfr2,14183:up                                                                                                                                                                                                                                                                                                                                                                                                                                                                                                                                                                                                                                                                                                                                                                                                                                                                                                                                                                                                                                          |
| positive regulation of striated muscle tissue development  | GO:0045844 | 2.38E-05 | 3.24E-04 | Fgfr1,14182:down Ncam1,17967:down Bmpr1a,12166:down Wisp1,22402:down Grem1,23892:up Igf1,16000:up Bmp4,12159:up Fgfr2,14183:up                                                                                                                                                                                                                                                                                                                                                                                                                                                                                                                                                                                                                                                                                                                                                                                                                                                                                                                                                                                                                                          |
| positive regulation of cellular metabolic process          | GO:0031325 | 2.39E-05 | 3.25E-04 | Fstl3,83554:down Igf1,16010:up Adm,11535:up Sfrp4,20379:up C3,12266:up Lyl1,17095:up Igf1,16009:up Plk2,20620:down Trf,22041:up Cd24a,12484:down Wnt5a,22418:down Il1rn,16181:up Maob,10973:up Adipoq,11450:up Bmp4,12159:up Igf1,16000:up Tgfb2,21808:down Ptgir,19222:up F3,14066:up Fgfr2,14183:up Htr2b,15559:down Prl2c2,18811:up Ccl6,20305:up Vdr,22337:down Htr2a,15558:down Slc40a1,53945:up Gas6,14456:up Egfr,13649:down Sfrp1,20377:up C1qtnf3,81799:down Tgfb3,21814:up Tfrc,22042:up Ceacam1,26365:up Ccl8,20307:up Sfrp2,20319:up Fam20a,208659:down Npnt,114249:up Tnfrsf11b,18383:up Ic1,218333:down Ccl2,20296:up Ccl7,20306:up Pdgfc,54635:down Ednrb,13618:up Epas1,13819:up Sema7a,20361:down Ddah1,69219:down Sdpr,20324:down Ptx3,19288:up Akr1c18,105349:up Ccl12,20293:up Bmpr1a,12166:down Ccl4,20303:up Ret,19713:up Plpp3,67916:up Creb3l1,26427:down Kitl,17311:up Ccl9,20308:up Rasl11a,68895:up Inhba,16323:down Ccl3,20302:up Crlf1,12931:down Plod2,26432:down Vegfa,22339:down Igf2,16002:up Pparg,19016:up Tnf,21926:up Lmcd1,30937:up Glp1r,14652:down Fgfr1,14182:down Hmox1,15368:up Cd4,12504:up Ptgs2,19225:down Grem1,23892:up |
| positive regulation of heart growth                        | GO:0060421 | 2.43E-05 | 3.29E-04 | Fgfr1,14182:down Ncam1,17967:down Bmpr1a,12166:down Wisp1,22402:down Fgfr2,14183:up Igf1,16000:up                                                                                                                                                                                                                                                                                                                                                                                                                                                                                                                                                                                                                                                                                                                                                                                                                                                                                                                                                                                                                                                                       |
| bone morphogenesis                                         | GO:0060349 | 2.46E-05 | 3.33E-04 | Alpl,11647:up Has2,15117:down Stc1,20855:up Bnc2,242509:down Mmp13,17386:up Bmp4,12159:up Serpinh1,12406:down Sfrp2,20319:up Fgfr2,14183:up                                                                                                                                                                                                                                                                                                                                                                                                                                                                                                                                                                                                                                                                                                                                                                                                                                                                                                                                                                                                                             |
| cellular homeostasis                                       | GO:0019725 | 2.48E-05 | 3.35E-04 | Htr2b,15559:down Kng1,16644:up Adm,11535:up Ccl2,20296:up Ednrb,13618:up Ccl3,20302:up Mt2,17750:up Vdr,22337:down Pdia5,72599:down Fam132b,227358:down Htr2a,15558:down Nxn,18230:down Slc40a1,53945:up Gas6,14456:up Glp1r,14652:down Fxyd1,56188:up Trf,22041:up Cd24a,12484:down Hmox1,15368:up C1qtnf3,81799:down Cd4,12504:up Stc1,20855:up Tfrc,22042:up Bmp4,12159:up Igf1,16000:up Tgfb2,21808:down Ptgir,19222:up Enpp1,18605:down Mt1,17748:up                                                                                                                                                                                                                                                                                                                                                                                                                                                                                                                                                                                                                                                                                                               |
| organ growth                                               | GO:0035265 | 2.50E-05 | 3.36E-04 | Fgfr1,14182:down Ncam1,17967:down Bmpr1a,12166:down Tgfb3,21814:up Wisp1,22402:down Stc1,20855:up Bnc2,242509:down Mmp13,17386:up Igf1,16000:up Tgfb2,21808:down Rspo2,239405:up Fgfr2,14183:up                                                                                                                                                                                                                                                                                                                                                                                                                                                                                                                                                                                                                                                                                                                                                                                                                                                                                                                                                                         |
| generation of neurons                                      | GO:0048699 | 2.52E-05 | 3.39E-04 | Adm,11535:up Flrt2,399558:down Plxnd1,67784:up Aldh1a2,19378:up Figf,14205:up Ednrb,13618:up Sema7a,20361:down Ankrd1,107765:down Tnfrsf12a,27279:down Postn,50706:down Cx3cr1,13051:down Plk2,20620:down Trf,22041:up Cd24a,12484:down Ncam1,17967:down Wnt5a,22418:down Bmpr1a,12166:down Mark1,226778:up Bmp4,12159:up Crabp2,12904:down Tnc,21923:down Ret,19713:up Tgfb2,21808:down Fgfr2,14183:up Cthrc1,68588:down Prl2c2,18811:up Lama2,16773:down Efemp1,216616:up Ptk7,71461:down Inhba,16323:down Dpysl3,22240:down Cxcl12,20315:up Vegfa,22339:down Serpine2,20720:up Mmp2,17390:down Pparg,19016:up Gas6,14456:up Egfr,13649:down Fgfr1,14182:down Sfrp1,20377:up Col3a1,12825:down Sfrp2,20319:up Mcoln3,171166:up Rspo2,239405:up                                                                                                                                                                                                                                                                                                                                                                                                                        |
| negative regulation of cytokine production                 | GO:0018181 | 2.56E-05 | 3.42E-04 | Tnf,21926:up Pparg,19016:up Gas6,14456:up Fgfr1,14182:down Cd24a,12484:down Hmox1,15368:up C1qtnf3,81799:down Adipoq,11450:up Ceacam1,26365:up Prg4,96875:down Tgfb2,21808:down Errf1,74155:down Il1rl1,17082:down                                                                                                                                                                                                                                                                                                                                                                                                                                                                                                                                                                                                                                                                                                                                                                                                                                                                                                                                                      |
| second-messenger-mediated signaling                        | GO:0019932 | 2.56E-05 | 3.42E-04 | Htr2b,15559:down Tnf,21926:up Glp1r,14652:down Lmcd1,30937:up Cd24a,12484:down Ncam1,17967:down Cd4,12504:up Ednrb,13618:up Ccl4,20303:up Mt2,17750:up Igf1,16000:up Ptgir,19222:up Mt1,17748:up                                                                                                                                                                                                                                                                                                                                                                                                                                                                                                                                                                                                                                                                                                                                                                                                                                                                                                                                                                        |
| transforming growth factor beta receptor signaling pathway | GO:0007179 | 2.57E-05 | 3.42E-04 | Col1a2,12843:down Hpgd,15446:up Tgfb3,21814:up Ccl2,20296:up Aspn,66695:down Col3a1,12825:down Htra3,78558:down Chst11,58250:down Tgfb2,21808:down Npnt,114249:up Cd109,235505:down                                                                                                                                                                                                                                                                                                                                                                                                                                                                                                                                                                                                                                                                                                                                                                                                                                                                                                                                                                                     |
| regulation of osteoblast differentiation                   | GO:0045667 | 2.57E-05 | 3.43E-04 | Cthrc1,68588:down Tnf,21926:up Fgfr1,14182:down Sfrp1,20377:up Bmpr1a,12166:down Igf1,16000:up Bmp4,12159:up Sfrp2,20319:up Vegfa,22339:down Npnt,114249:up                                                                                                                                                                                                                                                                                                                                                                                                                                                                                                                                                                                                                                                                                                                                                                                                                                                                                                                                                                                                             |
| positive regulation of muscle tissue development           | GO:0018663 | 2.66E-05 | 3.53E-04 | Fgfr1,14182:down Ncam1,17967:down Bmpr1a,12166:down Wisp1,22402:down Grem1,23892:up Igf1,16000:up Bmp4,12159:up Fgfr2,14183:up                                                                                                                                                                                                                                                                                                                                                                                                                                                                                                                                                                                                                                                                                                                                                                                                                                                                                                                                                                                                                                          |
| positive regulation of leukocyte chemotaxis                | GO:0002690 | 2.66E-05 | 3.53E-04 | Gas6,14456:up Cxcl14,57266:down Wnt5a,22418:down Ccl2,20296:up Figf,14205:up Ccl4,20303:up Cxcl9,17329:up Cxcl12,20315:up                                                                                                                                                                                                                                                                                                                                                                                                                                                                                                                                                                                                                                                                                                                                                                                                                                                                                                                                                                                                                                               |
| behavior                                                   | GO:0007610 | 2.70E-05 | 3.57E-04 | Htr2b,15559:down Plxnd1,67784:up Ccl2,20296:up Figf,14205:up Srp2,68792:down Cxcl12,20315:up Vegfa,22339:down Htr2a,15558:down Cx3cr1,13051:down Serpine2,20720:up Igf2,16002:up Gas6,14456:up Plk2,20620:down Glp1r,14652:down Cxcl14,57266:down Fgfr1,14182:down Egfr,13649:down Ncam1,17967:down Wnt5a,22418:down Ccl12,20293:up Ptgs2,19225:down Il1rn,16181:up Ccl4,20303:up Sncg,20618:up Grem1,23892:up Igf1,16000:up Cxcl9,17329:up Mcoln3,171166:up Aldh1a3,56847:down Prkar2b,19088:up                                                                                                                                                                                                                                                                                                                                                                                                                                                                                                                                                                                                                                                                        |
| positive regulation of protein import into nucleus         | GO:0042307 | 2.70E-05 | 3.57E-04 | Tnf,21926:up Egfr,13649:down Bmpr1a,12166:down Ptgs2,19225:down Grem1,23892:up Igf1,16000:up Bmp4,12159:up Ceacam1,26365:up Sfrp2,20319:up                                                                                                                                                                                                                                                                                                                                                                                                                                                                                                                                                                                                                                                                                                                                                                                                                                                                                                                                                                                                                              |
| stem cell proliferation                                    | GO:0072089 | 2.84E-05 | 3.74E-04 | Prl2c2,18811:up Fgfr1,14182:down Cd24a,12484:down Wnt5a,22418:down Bmpr1a,12166:down Bmp4,12159:up Sfrp2,20319:up Prg4,96875:down Vegfa,22339:down Cx3cr1,13051:down Fgfr2,14183:up Kitl,17311:up                                                                                                                                                                                                                                                                                                                                                                                                                                                                                                                                                                                                                                                                                                                                                                                                                                                                                                                                                                       |
| positive regulation of secretion                           | GO:0051047 | 2.88E-05 | 3.78E-04 | Htr2b,15559:down Ednrb,13618:up Ccl3,20302:up Mmp13,17386:up Ankrd1,107765:down Clec4n,56620:up Cxcl12,20315:up Postn,50706:down Tnf,21926:up Glp1r,14652:down Egfr,13649:down Fgfr1,14182:down Lpl,16956:up C1qtnf3,81799:down Wnt5a,22418:down Igf1,16000:up Ceacam1,26365:up Tgfb2,21808:down Clec4e,56619:up Il1rl1,17082:down                                                                                                                                                                                                                                                                                                                                                                                                                                                                                                                                                                                                                                                                                                                                                                                                                                      |

|                                                                |            |          |          |                                                                                                                                                                                                                                                                                                                                                                                                                                                                                           |
|----------------------------------------------------------------|------------|----------|----------|-------------------------------------------------------------------------------------------------------------------------------------------------------------------------------------------------------------------------------------------------------------------------------------------------------------------------------------------------------------------------------------------------------------------------------------------------------------------------------------------|
| positive regulation of cell development                        | GO:0010720 | 2.92E-05 | 3.82E-04 | Prl2c2,18811:up Ptk7,71461:down Dpysl3,22240:down Sema7a,20361:down Ankrd1,107765:down Tnfrsf12a,27279:down Vdr,22337:down Cxcl12,20315:up Vegfa,22339:down Cx3cr1,13051:down Serpine2,20720:up Pparg,19016:up Trf,22041:up Cd24a,12484:down Fgfr1,14182:down Has2,15117:down Wnt5a,22418:down Wisp1,22402:down Adipoq,11450:up Bmp4,12159:up Igf1,16000:up Crabp2,12904:down Ret,19713:up Tgfb2,21808:down                                                                               |
| regulation of cardiac muscle tissue development                | GO:0055024 | 2.97E-05 | 3.88E-04 | Fgfr1,14182:down Ncam1,17967:down Bmpr1a,12166:down Wisp1,22402:down Grem1,23892:up Igf1,16000:up Bmp4,12159:up Fgfr2,14183:up                                                                                                                                                                                                                                                                                                                                                            |
| organ maturation                                               | GO:0048799 | 2.99E-05 | 3.88E-04 | Fam101b,76566:down Ret,19713:up Aldh1a2,19378:up Grem1,23892:up Igf1,16000:up                                                                                                                                                                                                                                                                                                                                                                                                             |
| myeloid leukocyte cytokine production                          | GO:0061082 | 2.99E-05 | 3.88E-04 | Gas6,14456:up Hmox1,15368:up Wnt5a,22418:down Tgfb2,21808:down Sema7a,20361:down                                                                                                                                                                                                                                                                                                                                                                                                          |
| bone trabecula formation                                       | GO:0060346 | 3.12E-05 | 4.04E-04 | Sfrp1,20377:up Vegfa,22339:down Mmp2,17390:down Grem1,23892:up                                                                                                                                                                                                                                                                                                                                                                                                                            |
| negative regulation of immune response                         | GO:0050777 | 3.27E-05 | 4.22E-04 | Tnf,21926:up Pparg,19016:up Clec2d,93694:up Hmox1,15368:up Col3a1,12825:down Ceacam1,26365:up Serping1,12258:up Tgfb2,21808:down Igf1,16000:up Il1r1,17082:down                                                                                                                                                                                                                                                                                                                           |
| response to amino acid                                         | GO:0043200 | 3.31E-05 | 4.27E-04 | Col5a2,12832:down Tnf,21926:up Col1a2,12843:down Egfr,13649:down Pdgfc,54635:down Col3a1,12825:down Mmp2,17390:down Cdo1,12583:up                                                                                                                                                                                                                                                                                                                                                         |
| regulation of protein secretion                                | GO:0050708 | 3.34E-05 | 4.30E-04 | Htr2b,15559:down Ccl3,20302:up Mmp13,17386:up Ankrd1,107765:down Clec4n,56620:up Postn,50706:down Gas6,14456:up Tnf,21926:up Glp1r,14652:down Egfr,13649:down Lpl,16956:up Sfrp1,20377:up C1qtnf3,81799:down Wnt5a,22418:down Igf1,16000:up Ceacam1,26365:up Tgfb2,21808:down Clec4e,56619:up Il1r1,17082:down                                                                                                                                                                            |
| regulation of behavior                                         | GO:0050795 | 3.35E-05 | 4.30E-04 | Htr2b,15559:down Gas6,14456:up Cxcl14,57266:down Fgfr1,14182:down Plxnd1,67784:up Wnt5a,22418:down Ccl2,20296:up Ccl12,20293:up Figf,14205:up Grem1,23892:up Ccl4,20303:up Cxcl9,17329:up Cxcl12,20315:up Vegfa,22339:down Htr2a,15558:down                                                                                                                                                                                                                                               |
| positive regulation of fat cell differentiation                | GO:0045600 | 3.42E-05 | 4.39E-04 | Pparg,19016:up Sfrp2,20319:up Sfrp1,20377:up Htr2a,15558:down Medag,70717:down Ptgs2,19225:down Igf1,16000:up                                                                                                                                                                                                                                                                                                                                                                             |
| regulation of protein transport                                | GO:0051223 | 3.46E-05 | 4.42E-04 | Htr2b,15559:down Ice1,218333:down Ccl2,20296:up Ccl3,20302:up Mmp13,17386:up Ankrd1,107765:down Clec4n,56620:up Postn,50706:down Kdelr3,105785:down Gas6,14456:up Tnf,21926:up Glp1r,14652:down Egfr,13649:down Lpl,16956:up Sfrp1,20377:up C1qtnf3,81799:down Wnt5a,22418:down Bmpr1a,12166:down Ptgs2,19225:down Grem1,23892:up Adipoq,11450:up Bmp4,12159:up Igf1,16000:up Ceacam1,26365:up Sfrp2,20319:up Tgfb2,21808:down Il1r1,17082:down Clec4e,56619:up                           |
| positive regulation of secretion by cell                       | GO:1903532 | 3.47E-05 | 4.42E-04 | Htr2b,15559:down Ccl3,20302:up Mmp13,17386:up Ankrd1,107765:down Clec4n,56620:up Cxcl12,20315:up Postn,50706:down Tnf,21926:up Glp1r,14652:down Egfr,13649:down Fgfr1,14182:down Lpl,16956:up C1qtnf3,81799:down Wnt5a,22418:down Igf1,16000:up Ceacam1,26365:up Tgfb2,21808:down Clec4e,56619:up Il1r1,17082:down                                                                                                                                                                        |
| muscle tissue morphogenesis                                    | GO:0060415 | 3.68E-05 | 4.67E-04 | Col11a1,12814:down Wnt5a,22418:down Bmpr1a,12166:down Tgfb3,21814:up Col3a1,12825:down Ankrd1,107765:down Tgfb2,21808:down Fgfr2,14183:up                                                                                                                                                                                                                                                                                                                                                 |
| negative regulation of osteoclast differentiation              | GO:0045671 | 3.81E-05 | 4.82E-04 | Fstl3,83554:down Ceacam1,26365:up Clec2d,93694:up Lrrc17,74511:down Sfrp1,20377:up                                                                                                                                                                                                                                                                                                                                                                                                        |
| mesodermal cell differentiation                                | GO:0048333 | 3.81E-05 | 4.82E-04 | Sfrp2,20319:up Fgfr1,14182:down Inhba,16323:down Bmpr1a,12166:down Bmp4,12159:up                                                                                                                                                                                                                                                                                                                                                                                                          |
| negative regulation of apoptotic process                       | GO:0043066 | 3.93E-05 | 4.95E-04 | Htr2b,15559:down Ednrb,13618:up Crlf1,12931:down Cxcl12,20315:up Vegfa,22339:down Cx3cr1,13051:down Slc40a1,53945:up Gas6,14456:up Tnf,21926:up Plk2,20620:down Glp1r,14652:down Tnfrsf23,79201:down Egfr,13649:down Hmox1,15368:up Sfrp1,20377:up Wnt5a,22418:down Ccl12,20293:up Tgfb3,21814:up Il1rn,16181:up Grem1,23892:up Bmp4,12159:up Igf1,16000:up Chst11,58250:down Sfrp2,20319:up Tgfb2,21808:down Pdxk,216134:up Creb3l1,26427:down Fgfr2,14183:up Kitl,17311:up Mt1,17748:up |
| humoral immune response mediated by circulating immunoglobulin | GO:0002455 | 4.08E-05 | 5.12E-04 | Tnf,21926:up C1s1,50908:up Serping1,12258:up C1s2,317677:up C3,12266:up C1rb,667277:up                                                                                                                                                                                                                                                                                                                                                                                                    |
| digestive tract development                                    | GO:0048565 | 4.44E-05 | 5.54E-04 | Egfr,13649:down Sfrp1,20377:up Wnt5a,22418:down Aldh1a2,19378:up Pdgfc,54635:down Ednrb,13618:up Col3a1,12825:down Bmp4,12159:up Sfrp2,20319:up Fgfr2,14183:up                                                                                                                                                                                                                                                                                                                            |

|                                           |            |          |          |                                                                                                                                                                                                                                                                                                                                                                                                                                                                                                                                                                                                                                                                                                                                                                                                                                                                                                                                                                                                                                                                                                                                                                                                                                                                                                                                                                                                                                                                                                                                                                                                                                                                                                                                                                                                                                                                                                                                                                                                                                                                                                                                                                                                                                                                                                                                                                                                                                                                                                                                                                                                                                                                                                                                                                                                                                                                                                                                                            |
|-------------------------------------------|------------|----------|----------|------------------------------------------------------------------------------------------------------------------------------------------------------------------------------------------------------------------------------------------------------------------------------------------------------------------------------------------------------------------------------------------------------------------------------------------------------------------------------------------------------------------------------------------------------------------------------------------------------------------------------------------------------------------------------------------------------------------------------------------------------------------------------------------------------------------------------------------------------------------------------------------------------------------------------------------------------------------------------------------------------------------------------------------------------------------------------------------------------------------------------------------------------------------------------------------------------------------------------------------------------------------------------------------------------------------------------------------------------------------------------------------------------------------------------------------------------------------------------------------------------------------------------------------------------------------------------------------------------------------------------------------------------------------------------------------------------------------------------------------------------------------------------------------------------------------------------------------------------------------------------------------------------------------------------------------------------------------------------------------------------------------------------------------------------------------------------------------------------------------------------------------------------------------------------------------------------------------------------------------------------------------------------------------------------------------------------------------------------------------------------------------------------------------------------------------------------------------------------------------------------------------------------------------------------------------------------------------------------------------------------------------------------------------------------------------------------------------------------------------------------------------------------------------------------------------------------------------------------------------------------------------------------------------------------------------------------------|
| regulation of cellular process            | GO:0050794 | 4.45E-05 | 5.54E-04 | Fstl3,83554:down lgfbp4,16010:up Adm,11535:up Flrt2,399558:down Tmem176b,65963:up Plxnd1,67784:up Tfec,21426:up Sfrp4,20379:up Lyl1,17095:up lgfbp3,16009:up Plk2,20620:down Cd24a,12484:down I1rn,16181:up Maob,109731:up Bmp4,12159:up Oasl1,231655:up Hpse,15442:up Medag,70717:down Ptgir,19222:up Fgfr2,14183:up Thbs2,21826:down Htr2b,15559:down Dram1,71712:up Ccl6,20305:up Sipi,20568:up Aspn,66695:down Mt2,17750:up Cxcrc6,80901:down Fam132b,227358:down Nabp1,109019:down Mmp2,17390:down Oas3,246727:up Slc40a1,53945:up Egfr,13649:down Tfrc,22042:up Snccg,20618:up Ccl8,20307:up Serpina3g,20715:up Rspo2,239405:up Fam20a,208659:down Mt1,17748:up Col5a2,12832:down Aldh1a2,19378:up Ccl2,20296:up Ednrb,13618:up Mmp13,17386:up Htra3,78558:down Tnfrsf12a,27279:down Uchl5,56207:up Clec4n,56620:up Dok2,13449:up Hvcn1,74096:up PtX3,19288:up Ncam1,127967:down Ccl4,20303:up Chst11,58250:down Vegfb,22340:up Aldh1a3,56847:down Ppp3,67916:up Lrrc17,74511:down Lama2,16773:down Ccl9,20308:up Ptk7,71461:down Inhba,16323:down Bnc2,242509:down Tfpi2,21789:down Crif1,12931:down Plod2,26432:down Vegfa,22339:down Serpine2,20720:up Nxn,18230:down lgf2,16002:up Tmem176a,66058:up Tnf,21926:up Col1a2,12843:down Fxyd1,56188:up Fgfr1,14182:down Lpl,16956:up Sulf1,240725:down Sud2,71733:up Cd4,12504:up Col3a1,12825:down Tbx15,21384:down Serping1,12258:up Enpp1,18605:down Clec2d,93694:up Hpgd,15446:up C3,12266:up Ankrd1,107765:down Cx3cr1,13051:down Cd109,235505:down Loxl2,94352:down Trf,22041:up Loxl3,16950:down Cxl14,57266:down Wnt5a,22418:down Stc1,20855:up Mark1,226778:up Col8a1,12837:down Adipoq,11450:up lgf1,16000:up Crabp2,12904:down Cxl9,17329:up Tgfb2,21808:down F3,14066:up Clec4e,56619:up CtHrc1,68588:down Kng1,16644:up Pr1c2,18811:up Efemp1,216616:up Dpysl3,22240:down Ninj1,18081:up Saa3,20210:up Vdr,22337:down Pdia5,72599:down Fabbp4,11770:up Cxl12,20315:up Htr2a,15558:down Smoc2,64074:down Gas6,14456:up Sfrp1,20377:up C1qtnf3,81799:down Tgfb3,21814:up Fxyd2,11936:up Ceacam1,26365:up Sfrp2,20319:up Tnfrsf11b,18383:up Prkr2b,19088:up Npnt,114249:up S100a1,20193:up Ice1,218333:down Ccl7,20306:up Pdgfc,54635:down Figf,14205:up Cst7,13011:up Sema7a,20361:down Epas1,13819:up Slc29a1,63959:up Gpm6b,14758:up Ddah1,69219:down Sdpr,20324:down Postn,50706:down Akr1c18,105349:up Ccl12,20293:up Bmpr1a,12166:down Wisp1,22402:down Tnc,21923:down Ret,19713:up Prg4,96875:down Sdf2l1,64136:up Pdxk,216134:up lfit1,15957:up Creb3l1,26427:down Kitl,17311:up I1rl1,17082:down Fam101b,76566:down Hp,15439:up Rasl11a,68895:up Ccl3,20302:up Plat,18791:down Ctla2a,13024:down Sprx2,68792:down Adamts12,239337:down Lrrc15,74488:down Pparg,19016:up Lmcd1,30937:up Glp1r,14652:down Tnfrsf23,79201:down Hmox1,15368:up Has2,15117:down Ptgs2,19225:down Grem1,23892:up Kcnj15,16516:down Phf11d,219132:up Col5a1,12831:down Errfi1,74155:down Tnfsf9,21950:up |
| response to BMP                           | GO:0071772 | 4.45E-05 | 5.54E-04 | Fstl3,83554:down Sfrp1,20377:up Sulf1,240725:down Wnt5a,22418:down Bmpr1a,12166:down Tgfb3,21814:up Grem1,23892:up Bmp4,12159:up Htra3,78558:down Sfrp2,20319:up Adamts12,239337:down                                                                                                                                                                                                                                                                                                                                                                                                                                                                                                                                                                                                                                                                                                                                                                                                                                                                                                                                                                                                                                                                                                                                                                                                                                                                                                                                                                                                                                                                                                                                                                                                                                                                                                                                                                                                                                                                                                                                                                                                                                                                                                                                                                                                                                                                                                                                                                                                                                                                                                                                                                                                                                                                                                                                                                      |
| cellular response to BMP stimulus         | GO:0071773 | 4.45E-05 | 5.54E-04 | Fstl3,83554:down Sfrp1,20377:up Sulf1,240725:down Wnt5a,22418:down Bmpr1a,12166:down Tgfb3,21814:up Grem1,23892:up Bmp4,12159:up Htra3,78558:down Sfrp2,20319:up Adamts12,239337:down                                                                                                                                                                                                                                                                                                                                                                                                                                                                                                                                                                                                                                                                                                                                                                                                                                                                                                                                                                                                                                                                                                                                                                                                                                                                                                                                                                                                                                                                                                                                                                                                                                                                                                                                                                                                                                                                                                                                                                                                                                                                                                                                                                                                                                                                                                                                                                                                                                                                                                                                                                                                                                                                                                                                                                      |
| response to hormone                       | GO:0009725 | 4.55E-05 | 5.66E-04 | Inhba,16323:down Vdr,22337:down Sord,20322:up Mmp2,17390:down lgf2,16002:up Pappa,18491:down Cdo1,12583:up Pparg,19016:up Tnf,21926:up Akr1c18,105349:up Egfr,13649:down Cd24a,12484:down Alpl,11647:up Hmox1,15368:up Sfrp1,20377:up Tgfb3,21814:up I1rn,16181:up Adipoq,11450:up Bmp4,12159:up lgf1,16000:up Gatm,67092:down Serpina3g,20715:up Tgfb2,21808:down Ptgir,19222:up Enpp1,18605:down                                                                                                                                                                                                                                                                                                                                                                                                                                                                                                                                                                                                                                                                                                                                                                                                                                                                                                                                                                                                                                                                                                                                                                                                                                                                                                                                                                                                                                                                                                                                                                                                                                                                                                                                                                                                                                                                                                                                                                                                                                                                                                                                                                                                                                                                                                                                                                                                                                                                                                                                                         |
| response to organic cyclic compound       | GO:0014070 | 4.58E-05 | 5.68E-04 | Htr2b,15559:down Inhba,16323:down lfit3,15959:up Saa3,20210:up Vdr,22337:down Htr2a,15558:down Mmp2,17390:down lgf2,16002:up Pappa,18491:down Cdo1,12583:up Pparg,19016:up Tnf,21926:up Akr1c18,105349:up Egfr,13649:down Cd24a,12484:down Alpl,11647:up Ncam1,127967:down Hmox1,15368:up Sfrp1,20377:up Ccl12,20293:up I1rn,16181:up Adipoq,11450:up Bmp4,12159:up lgf1,16000:up Tgfb2,21808:down lfit1,15957:up                                                                                                                                                                                                                                                                                                                                                                                                                                                                                                                                                                                                                                                                                                                                                                                                                                                                                                                                                                                                                                                                                                                                                                                                                                                                                                                                                                                                                                                                                                                                                                                                                                                                                                                                                                                                                                                                                                                                                                                                                                                                                                                                                                                                                                                                                                                                                                                                                                                                                                                                          |
| fever generation                          | GO:0001660 | 4.61E-05 | 5.70E-04 | Tnf,21926:up Ptgs2,19225:down I1rn,16181:up Ednrb,13618:up                                                                                                                                                                                                                                                                                                                                                                                                                                                                                                                                                                                                                                                                                                                                                                                                                                                                                                                                                                                                                                                                                                                                                                                                                                                                                                                                                                                                                                                                                                                                                                                                                                                                                                                                                                                                                                                                                                                                                                                                                                                                                                                                                                                                                                                                                                                                                                                                                                                                                                                                                                                                                                                                                                                                                                                                                                                                                                 |
| protein secretion                         | GO:0009306 | 4.71E-05 | 5.81E-04 | Htr2b,15559:down Ccl3,20302:up Mmp13,17386:up Ankrd1,107765:down Clec4n,56620:up Postn,50706:down Gas6,14456:up Tnf,21926:up Glp1r,14652:down Egfr,13649:down Lpl,16956:up Sfrp1,20377:up C1qtnf3,81799:down Wnt5a,22418:down I1rn,16181:up Snccg,20618:up lgf1,16000:up Ceacam1,26365:up Tgfb2,21808:down Clec4e,56619:up I1rl1,17082:down                                                                                                                                                                                                                                                                                                                                                                                                                                                                                                                                                                                                                                                                                                                                                                                                                                                                                                                                                                                                                                                                                                                                                                                                                                                                                                                                                                                                                                                                                                                                                                                                                                                                                                                                                                                                                                                                                                                                                                                                                                                                                                                                                                                                                                                                                                                                                                                                                                                                                                                                                                                                                |
| positive regulation of cell-cell adhesion | GO:0022409 | 4.74E-05 | 5.84E-04 | Fstl3,83554:down Tnf,21926:up Cd24a,12484:down Has2,15117:down Wnt5a,22418:down Ccl2,20296:up Cd4,12504:up Tfrc,22042:up lgf1,16000:up Ceacam1,26365:up Ppp3,67916:up lgf2,16002:up Tnfsf9,21950:up                                                                                                                                                                                                                                                                                                                                                                                                                                                                                                                                                                                                                                                                                                                                                                                                                                                                                                                                                                                                                                                                                                                                                                                                                                                                                                                                                                                                                                                                                                                                                                                                                                                                                                                                                                                                                                                                                                                                                                                                                                                                                                                                                                                                                                                                                                                                                                                                                                                                                                                                                                                                                                                                                                                                                        |
| collagen biosynthetic process             | GO:0032964 | 4.79E-05 | 5.88E-04 | Serpinh1,12406:down Pparg,19016:up Col5a1,12831:down Ccl2,20296:up Errfi1,74155:down Bmp4,12159:up                                                                                                                                                                                                                                                                                                                                                                                                                                                                                                                                                                                                                                                                                                                                                                                                                                                                                                                                                                                                                                                                                                                                                                                                                                                                                                                                                                                                                                                                                                                                                                                                                                                                                                                                                                                                                                                                                                                                                                                                                                                                                                                                                                                                                                                                                                                                                                                                                                                                                                                                                                                                                                                                                                                                                                                                                                                         |
| regulation of nervous system development  | GO:0051960 | 4.91E-05 | 6.01E-04 | Pr1c2,18811:up Flrt2,399558:down Efemp1,216616:up Plxnd1,67784:up Ptk7,71461:down Dpysl3,22240:down Ednrb,13618:up Sema7a,20361:down Ankrd1,107765:down Tnfrsf12a,27279:down Sprx2,68792:down Cxl12,20315:up Vegfa,22339:down Cx3cr1,13051:down Serpine2,20720:up Pparg,19016:up Tnf,21926:up Plk2,20620:down Trf,22041:up Fgfr1,14182:down Cd24a,12484:down Sfrp1,20377:up Wnt5a,22418:down Bmpr1a,12166:down Col3a1,12825:down Bmp4,12159:up lgf1,16000:up Crabp2,12904:down Sfrp2,20319:up Ret,19713:up Thbs2,21826:down                                                                                                                                                                                                                                                                                                                                                                                                                                                                                                                                                                                                                                                                                                                                                                                                                                                                                                                                                                                                                                                                                                                                                                                                                                                                                                                                                                                                                                                                                                                                                                                                                                                                                                                                                                                                                                                                                                                                                                                                                                                                                                                                                                                                                                                                                                                                                                                                                                |
| cellular response to amino acid stimulus  | GO:0071230 | 5.00E-05 | 6.07E-04 | Col5a2,12832:down Tnf,21926:up Col1a2,12843:down Egfr,13649:down Pdgfc,54635:down Mmp2,17390:down Col3a1,12825:down                                                                                                                                                                                                                                                                                                                                                                                                                                                                                                                                                                                                                                                                                                                                                                                                                                                                                                                                                                                                                                                                                                                                                                                                                                                                                                                                                                                                                                                                                                                                                                                                                                                                                                                                                                                                                                                                                                                                                                                                                                                                                                                                                                                                                                                                                                                                                                                                                                                                                                                                                                                                                                                                                                                                                                                                                                        |
| cardiac muscle tissue growth              | GO:0055017 | 5.00E-05 | 6.07E-04 | Fgfr1,14182:down Ncam1,127967:down Bmpr1a,12166:down Tgfb3,21814:up Wisp1,22402:down lgf1,16000:up Tgfb2,21808:down Fgfr2,14183:up                                                                                                                                                                                                                                                                                                                                                                                                                                                                                                                                                                                                                                                                                                                                                                                                                                                                                                                                                                                                                                                                                                                                                                                                                                                                                                                                                                                                                                                                                                                                                                                                                                                                                                                                                                                                                                                                                                                                                                                                                                                                                                                                                                                                                                                                                                                                                                                                                                                                                                                                                                                                                                                                                                                                                                                                                         |
| reproductive structure development        | GO:0048608 | 5.01E-05 | 6.07E-04 | Adm,11535:up Inhba,16323:down Gjb5,14622:down Epas1,13819:up Vegfa,22339:down Mmp2,17390:down Serpine2,20720:up Pparg,19016:up Egfr,13649:down Sfrp1,20377:up Sulf1,240725:down Wnt5a,22418:down Ptgs2,19225:down Bmp4,12159:up lgf1,16000:up Sfrp2,20319:up Tnc,21923:down Fgfr2,14183:up Kitl,17311:up                                                                                                                                                                                                                                                                                                                                                                                                                                                                                                                                                                                                                                                                                                                                                                                                                                                                                                                                                                                                                                                                                                                                                                                                                                                                                                                                                                                                                                                                                                                                                                                                                                                                                                                                                                                                                                                                                                                                                                                                                                                                                                                                                                                                                                                                                                                                                                                                                                                                                                                                                                                                                                                   |
| mesonephric epithelium development        | GO:0072163 | 5.02E-05 | 6.07E-04 | Fgfr1,14182:down Sfrp1,20377:up Grem1,23892:up Bmp4,12159:up Crif1,12931:down Ret,19713:up Vegfa,22339:down Npnt,114249:up Fgfr2,14183:up                                                                                                                                                                                                                                                                                                                                                                                                                                                                                                                                                                                                                                                                                                                                                                                                                                                                                                                                                                                                                                                                                                                                                                                                                                                                                                                                                                                                                                                                                                                                                                                                                                                                                                                                                                                                                                                                                                                                                                                                                                                                                                                                                                                                                                                                                                                                                                                                                                                                                                                                                                                                                                                                                                                                                                                                                  |
| ureteric bud development                  | GO:0001657 | 5.02E-05 | 6.07E-04 | Fgfr1,14182:down Sfrp1,20377:up Grem1,23892:up Bmp4,12159:up Crif1,12931:down Ret,19713:up Vegfa,22339:down Npnt,114249:up Fgfr2,14183:up                                                                                                                                                                                                                                                                                                                                                                                                                                                                                                                                                                                                                                                                                                                                                                                                                                                                                                                                                                                                                                                                                                                                                                                                                                                                                                                                                                                                                                                                                                                                                                                                                                                                                                                                                                                                                                                                                                                                                                                                                                                                                                                                                                                                                                                                                                                                                                                                                                                                                                                                                                                                                                                                                                                                                                                                                  |
| mesonephric tubule development            | GO:0072164 | 5.02E-05 | 6.07E-04 | Fgfr1,14182:down Sfrp1,20377:up Grem1,23892:up Bmp4,12159:up Crif1,12931:down Ret,19713:up Vegfa,22339:down Npnt,114249:up Fgfr2,14183:up                                                                                                                                                                                                                                                                                                                                                                                                                                                                                                                                                                                                                                                                                                                                                                                                                                                                                                                                                                                                                                                                                                                                                                                                                                                                                                                                                                                                                                                                                                                                                                                                                                                                                                                                                                                                                                                                                                                                                                                                                                                                                                                                                                                                                                                                                                                                                                                                                                                                                                                                                                                                                                                                                                                                                                                                                  |
| positive regulation of cell growth        | GO:0030307 | 5.07E-05 | 6.12E-04 | Egfr,13649:down Sfrp1,20377:up Wisp1,22402:down Sema7a,20361:down lgf1,16000:up Tnfrsf12a,27279:down Sfrp2,20319:up Crabp2,12904:down Cxl12,20315:up Vegfa,22339:down Tgfb2,21808:down                                                                                                                                                                                                                                                                                                                                                                                                                                                                                                                                                                                                                                                                                                                                                                                                                                                                                                                                                                                                                                                                                                                                                                                                                                                                                                                                                                                                                                                                                                                                                                                                                                                                                                                                                                                                                                                                                                                                                                                                                                                                                                                                                                                                                                                                                                                                                                                                                                                                                                                                                                                                                                                                                                                                                                     |

|                                                        |             |          |          |                                                                                                                                                                                                                                                                                                                                                                                                                                                                                                                                                                                                                                                                                                                                                                                                                                                                                                                                                                                         |
|--------------------------------------------------------|-------------|----------|----------|-----------------------------------------------------------------------------------------------------------------------------------------------------------------------------------------------------------------------------------------------------------------------------------------------------------------------------------------------------------------------------------------------------------------------------------------------------------------------------------------------------------------------------------------------------------------------------------------------------------------------------------------------------------------------------------------------------------------------------------------------------------------------------------------------------------------------------------------------------------------------------------------------------------------------------------------------------------------------------------------|
| positive regulation of protein localization to nucleus | GO:1900182  | 5.14E-05 | 6.20E-04 | Tnf,21926:up Egfr,13649:down Bmpr1a,12166:down Ptgs2,19225:down Grem1,23892:up Igf1,16000:up Bmp4,12159:up Ceacam1,26365:up Sfrp2,20319:up Tgfb2,21808:down                                                                                                                                                                                                                                                                                                                                                                                                                                                                                                                                                                                                                                                                                                                                                                                                                             |
| regulation of cellular localization                    | GO:0060341  | 5.19E-05 | 6.24E-04 | Ice1,218333:down Ccl2,20296:up Mmp13,17386:up Ankrd1,107765:down Gpm6b,14758:up Clec4n,56620:up Postn,50706:down Ncam1,17967:down Wnt5a,22418:down Bmpr1a,12166:down Irlr1,16181:up Maob,109731:up Adipoq,11450:up Bmp4,12159:up Igf1,16000:up Tgfb2,21808:down Irlr1,17082:down Clec4e,56619:up Htr2b,15559:down Inhba,16323:down Ccl3,20302:up Cxl12,20315:up Htr2a,15558:down Lrrc15,74488:down Pparg,19016:up Gas6,14456:up Tnf,21926:up Glp1r,14652:down Egfr,13649:down Fgfr1,14182:down Sfrp1,20377:up Lpl,16956:up Hmox1,15368:up C1qtnf3,81799:down Cd4,12504:up Ptgs2,19225:down Sncg,20618:up Grem1,23892:up Ceacam1,26365:up Sfrp2,20319:up                                                                                                                                                                                                                                                                                                                                 |
| regulation of establishment of protein localization    | GO:0070201  | 5.20E-05 | 6.24E-04 | Htr2b,15559:down Ice1,218333:down Ccl2,20296:up Ccl3,20302:up Mmp13,17386:up Ankrd1,107765:down Clec4n,56620:up Postn,50706:down Lrrc15,74488:down Kdelr3,105785:down Gas6,14456:up Tnf,21926:up Glp1r,14652:down Egfr,13649:down Lpl,16956:up Sfrp1,20377:up C1qtnf3,81799:down Wnt5a,22418:down Bmpr1a,12166:down Ptgs2,19225:down Grem1,23892:up Adipoq,11450:up Bmp4,12159:up Igf1,16000:up Ceacam1,26365:up Sfrp2,20319:up Tgfb2,21808:down Irlr1,17082:down Clec4e,56619:up                                                                                                                                                                                                                                                                                                                                                                                                                                                                                                       |
| negative regulation of programmed cell death           | GO:0043069  | 5.39E-05 | 6.45E-04 | Htr2b,15559:down Ednrb,13618:up Crlf1,12931:down Cxl12,20315:up Vegfa,22339:down Cx3cr1,13051:down Slc40a1,53945:up Gas6,14456:up Tnf,21926:up Plk2,20620:down Glp1r,14652:down Tnfrsf23,79201:down Egfr,13649:down Hmox1,15368:up Sfrp1,20377:up Wnt5a,22418:down Ccl12,20293:up Tgfb3,21814:up Irlr1,16181:up Grem1,23892:up Bmp4,12159:up Igf1,16000:up Chst11,58250:down Sfrp2,20319:up Tgfb2,21808:down Pdkk,216134:up Creb3l1,26427:down Fgfr2,14183:up Kitl,17311:up Mt1,17748:up                                                                                                                                                                                                                                                                                                                                                                                                                                                                                                |
| regulation of leukocyte migration                      | GO:0002685  | 5.41E-05 | 6.47E-04 | Gas6,14456:up Cxl14,57266:down Wnt5a,22418:down Ccl2,20296:up Ccl12,20293:up Figf,14205:up Grem1,23892:up Ccl4,20303:up Cxl9,17329:up Cxl12,20315:up Kitl,17311:up                                                                                                                                                                                                                                                                                                                                                                                                                                                                                                                                                                                                                                                                                                                                                                                                                      |
| cell development                                       | GO:0048468  | 5.50E-05 | 6.56E-04 | Adm,11535:up Flrt2,399558:down Plxnd1,67784:up Aldh1a2,19378:up Ednrb,13618:up Sema7a,20361:down Epas1,13819:up Ankrd1,107765:down Tnfrsf12a,27279:down Serpinh1,12406:down Postn,50706:down Cx3cr1,13051:down Loxl2,94352:down Plk2,20620:down Loxl3,16950:down Trf,22041:up Cd24a,12484:down Ncam1,17967:down Wnt5a,22418:down Bmpr1a,12166:down Wisp1,22402:down Stc1,20855:up Adipoq,11450:up Bmp4,12159:up Igf1,16000:up Chst11,58250:down Crabp2,12904:down Tnc,21923:down Ret,19713:up Tgfb2,21808:down Fgfr2,14183:up Kitl,17311:up Fam101b,76566:down Chtrc1,68588:down Htr2b,15559:down Prl2c2,18811:up Lama2,16773:down Efemp1,216616:up Ptk7,71461:down Inhba,16323:down Dpysl3,22240:down Vdr,22337:down Cxl12,20315:up Vegfa,22339:down Mmp2,17390:down Serpine2,20720:up Pparg,19016:up Tnf,21926:up Col11a1,12814:down Egfr,13649:down Fgfr1,14182:down Has2,15117:down Sfrp1,20377:up Sulf1,240725:down Tgfb3,21814:up Grem1,23892:up Col3a1,12825:down Sfrp2,20319:up |
| smooth muscle cell migration                           | GO:0014909  | 5.52E-05 | 6.56E-04 | Has2,15117:down Bmpr1a,12166:down Plat,18791:down Igf1,16000:up Adipoq,11450:up Postn,50706:down Igf1,16000:up F3,14066:up                                                                                                                                                                                                                                                                                                                                                                                                                                                                                                                                                                                                                                                                                                                                                                                                                                                              |
| vascular process in circulatory system                 | GO:0003018  | 5.53E-05 | 6.56E-04 | Htr2b,15559:down Kng1,16644:up Adm,11535:up Egfr,13649:down Tgfb3,21814:up Ptgs2,19225:down Ednrb,13618:up Ccl4,20303:up Ceacam1,26365:up Vegfa,22339:down Htr2a,15558:down Mmp2,17390:down                                                                                                                                                                                                                                                                                                                                                                                                                                                                                                                                                                                                                                                                                                                                                                                             |
| negative regulation of ion transport                   | GO:0043271  | 5.53E-05 | 6.56E-04 | Tnf,21926:up Sfrp4,20379:up Ptgs2,19225:down Stc1,20855:up Irlr1,16181:up Maob,109731:up Gpm6b,14758:up Tgfb2,21808:down Htr2a,15558:down Serpine2,20720:up                                                                                                                                                                                                                                                                                                                                                                                                                                                                                                                                                                                                                                                                                                                                                                                                                             |
| reproductive system development                        | GO:0061458  | 5.58E-05 | 6.60E-04 | Adm,11535:up Inhba,16323:down Gjb5,14622:down Epas1,13819:up Vegfa,22339:down Mmp2,17390:down Serpine2,20720:up Pparg,19016:up Egfr,13649:down Sfrp1,20377:up Sulf1,240725:down Wnt5a,22418:down Ptgs2,19225:down Bmp4,12159:up Igf1,16000:up Sfrp2,20319:up Tnc,21923:down Fgfr2,14183:up Kitl,17311:up                                                                                                                                                                                                                                                                                                                                                                                                                                                                                                                                                                                                                                                                                |
| negative regulation of cell death                      | GO:0060548  | 5.60E-05 | 6.61E-04 | Ednrb,13618:up Cx3cr1,13051:down Plk2,20620:down Ncam1,17967:down Wnt5a,22418:down Ccl12,20293:up Wisp1,22402:down Irlr1,16181:up Bmp4,12159:up Igf1,16000:up Chst11,58250:down Tgfb2,21808:down Pdkk,216134:up Creb3l1,26427:down Fgfr2,14183:up Kitl,17311:up Htr2b,15559:down Crlf1,12931:down Cxl12,20315:up Vegfa,22339:down Slc40a1,53945:up Tnf,21926:up Gas6,14456:up Glp1r,14652:down Egfr,13649:down Tnfrsf23,79201:down Sfrp1,20377:up Hmox1,15368:up Tgfb3,21814:up Grem1,23892:up Sfrp2,20319:up Mt1,17748:up                                                                                                                                                                                                                                                                                                                                                                                                                                                              |
| response to steroid hormone                            | GO:0048545  | 5.63E-05 | 6.63E-04 | Vdr,22337:down Mmp2,17390:down Pappa,18491:down Cdo1,12583:up Pparg,19016:up Tnf,21926:up Akr1c18,105349:up Alpl,11647:up Cd24a,12484:down Egfr,13649:down Hmox1,15368:up Sfrp1,20377:up Irlr1,16181:up Bmp4,12159:up Igf1,16000:up Tgfb2,21808:down                                                                                                                                                                                                                                                                                                                                                                                                                                                                                                                                                                                                                                                                                                                                    |
| exocrine system development                            | GO:0035272  | 5.64E-05 | 6.63E-04 | Tnf,21926:up Fgfr1,14182:down Egfr,13649:down Plxnd1,67784:up Igf2,16002:up Fgfr2,14183:up Igf1,16000:up                                                                                                                                                                                                                                                                                                                                                                                                                                                                                                                                                                                                                                                                                                                                                                                                                                                                                |
| natural killer cell chemotaxis                         | GO:0035747  | 5.69E-05 | 6.65E-04 | Cxl14,57266:down Ccl12,20293:up Ccl4,20303:up                                                                                                                                                                                                                                                                                                                                                                                                                                                                                                                                                                                                                                                                                                                                                                                                                                                                                                                                           |
| regulation of natural killer cell chemotaxis           | GO:0000501  | 5.69E-05 | 6.65E-04 | Cxl14,57266:down Ccl12,20293:up Ccl4,20303:up                                                                                                                                                                                                                                                                                                                                                                                                                                                                                                                                                                                                                                                                                                                                                                                                                                                                                                                                           |
| regulation of cytokine secretion                       | GO:0050707  | 5.77E-05 | 6.74E-04 | Htr2b,15559:down Tnf,21926:up Gas6,14456:up Lpl,16956:up C1qtnf3,81799:down Wnt5a,22418:down Ccl3,20302:up Clec4n,56620:up Postn,50706:down Clec4e,56619:up Irlr1,17082:down                                                                                                                                                                                                                                                                                                                                                                                                                                                                                                                                                                                                                                                                                                                                                                                                            |
| mesonephros development                                | GO:0001823  | 5.93E-05 | 6.91E-04 | Fgfr1,14182:down Sfrp1,20377:up Grem1,23892:up Bmp4,12159:up Crlf1,12931:down Ret,19713:up Vegfa,22339:down Npnt,114249:up Fgfr2,14183:up                                                                                                                                                                                                                                                                                                                                                                                                                                                                                                                                                                                                                                                                                                                                                                                                                                               |
| neutrophil migration                                   | GO:1990266  | 6.09E-05 | 7.06E-04 | Ccl9,20308:up Ccl6,20305:up Ccl7,20306:up Ccl2,20296:up Ccl12,20293:up Ccl4,20303:up Ccl3,20302:up Ccl8,20307:up                                                                                                                                                                                                                                                                                                                                                                                                                                                                                                                                                                                                                                                                                                                                                                                                                                                                        |
| positive regulation of endothelial cell proliferation  | GO:0001938  | 6.35E-05 | 7.36E-04 | Htr2b,15559:down Cxl12,20315:up Wnt5a,22418:down Vegfa,22339:down Ccl2,20296:up F3,14066:up Bmp4,12159:up                                                                                                                                                                                                                                                                                                                                                                                                                                                                                                                                                                                                                                                                                                                                                                                                                                                                               |
| regulation of bone resorption                          | GO:0045124  | 6.53E-05 | 7.55E-04 | Ceacam1,26365:up Trf,22041:up Egfr,13649:down Vegfa,22339:down Tfrc,22042:up Tnfrsf11b,18383:up                                                                                                                                                                                                                                                                                                                                                                                                                                                                                                                                                                                                                                                                                                                                                                                                                                                                                         |
| lateral sprouting from an epithelium                   | GO:0060601  | 6.57E-05 | 7.56E-04 | Sulf1,240725:down Wnt5a,22418:down Fgfr2,14183:up Bmp4,12159:up                                                                                                                                                                                                                                                                                                                                                                                                                                                                                                                                                                                                                                                                                                                                                                                                                                                                                                                         |
| positive regulation of nervous system development      | GO:0051962  | 6.67E-05 | 7.67E-04 | Prl2c2,18811:up Flrt2,399558:down Ptk7,71461:down Dpysl3,22240:down Sema7a,20361:down Ankrd1,107765:down Tnfrsf12a,27279:down Srxp2,68792:down Cxl12,20315:up Vegfa,22339:down Cx3cr1,13051:down Serpine2,20720:up Pparg,19016:up Trf,22041:up Cd24a,12484:down Fgfr1,14182:down Wnt5a,22418:down Bmp4,12159:up Igf1,16000:up Crabp2,12904:down Ret,19713:up Thbs2,21826:down                                                                                                                                                                                                                                                                                                                                                                                                                                                                                                                                                                                                           |
| cellular response to inorganic substance               | GO:00071241 | 6.98E-05 | 8.00E-04 | Pparg,19016:up Akr1c18,105349:up Hvcn1,74096:up Trf,22041:up Hmox1,15368:up Tfrc,22042:up Fabp4,11770:up Mt1,17748:up Slc40a1,53945:up                                                                                                                                                                                                                                                                                                                                                                                                                                                                                                                                                                                                                                                                                                                                                                                                                                                  |
| proteoglycan metabolic process                         | GO:0006029  | 7.13E-05 | 8.17E-04 | Mamdc2,71738:down Chst11,58250:down Col11a1,12814:down Sulf1,240725:down Hpse,15442:up Adams12,239337:down Igf1,16000:up                                                                                                                                                                                                                                                                                                                                                                                                                                                                                                                                                                                                                                                                                                                                                                                                                                                                |

|                                                                                |            |          |          |                                                                                                                                                                                                                                                                                                                                                         |
|--------------------------------------------------------------------------------|------------|----------|----------|---------------------------------------------------------------------------------------------------------------------------------------------------------------------------------------------------------------------------------------------------------------------------------------------------------------------------------------------------------|
| regulation of cell fate commitment                                             | GO:0010453 | 7.35E-05 | 8.37E-04 | Sfrp2,20319:up Fgfr1,14182:down Bmpr1a,12166:down Fgfr2,14183:up Bmp4,12159:up                                                                                                                                                                                                                                                                          |
| negative regulation of myoblast differentiation                                | GO:0045662 | 7.35E-05 | 8.37E-04 | Tnf,21926:up Prl2c2,18811:up Cxcl14,57266:down Ccl9,20308:up Bmp4,12159:up                                                                                                                                                                                                                                                                              |
| acute-phase response                                                           | GO:0006953 | 7.56E-05 | 8.56E-04 | Tnf,21926:up Hp,15439:up Ptgs2,19225:down Il1rn,16181:up Ednrb,13618:up Saa3,20210:up                                                                                                                                                                                                                                                                   |
| negative regulation of myeloid leukocyte differentiation                       | GO:0002762 | 7.56E-05 | 8.56E-04 | Fstl3,83554:down Ceacam1,26365:up Clec2d,93694:up Lrrc17,74511:down Sfrp1,20377:up Adipoq,11450:up                                                                                                                                                                                                                                                      |
| negative regulation of protein phosphorylation                                 | GO:0001933 | 7.81E-05 | 8.83E-04 | Flrt2,399558:down Sfrp4,20379:up Aspn,66695:down Fabp4,11770:up Igf1,16000:up Cd109,235505:down Lrrc15,74488:down Sfrp1,20377:up Grem1,23892:up Adipoq,11450:up Bmp4,12159:up Igf1,16000:up Ceacam1,26365:up Sfrp2,20319:up Prkar2b,19088:up Plpp3,67916:up Enpp1,18605:down Errf1,74155:down                                                           |
| regulation of body fluid levels                                                | GO:0050878 | 7.84E-05 | 8.83E-04 | Kng1,16644:up C3,12266:up Pdgc,54635:down Anxa8,11752:down Ednrb,13618:up Mmp13,17386:up Tfpi2,21789:down Vdr,22337:down Vegfa,22339:down Serpine2,20720:up Cdo1,12583:up Gas6,14456:up Ceacam1,26365:up Serpin1,12258:up Hpse,15442:up F3,14066:up                                                                                                     |
| neural crest cell differentiation                                              | GO:0014033 | 8.07E-05 | 9.04E-04 | Htr2b,15559:down Sfrp1,20377:up Bmpr1a,12166:down Aldh1a2,19378:up Ednrb,13618:up Sema7a,20361:down Ret,19713:up Kitl,17311:up                                                                                                                                                                                                                          |
| muscle organ morphogenesis                                                     | GO:0048644 | 8.07E-05 | 9.04E-04 | Col11a1,12814:down Wnt5a,22418:down Bmpr1a,12166:down Tgfb3,21814:up Col3a1,12825:down Ankrd1,107765:down Tgfb2,21808:down Fgfr2,14183:up                                                                                                                                                                                                               |
| heart growth                                                                   | GO:0060419 | 8.07E-05 | 9.04E-04 | Fgfr1,14182:down Ncam1,17967:down Bmpr1a,12166:down Tgfb3,21814:up Wisp1,22402:down Igf1,16000:up Tgfb2,21808:down Fgfr2,14183:up                                                                                                                                                                                                                       |
| cellular divalent inorganic cation homeostasis                                 | GO:0072503 | 8.10E-05 | 9.05E-04 | Htr2b,15559:down Kng1,16644:up Adm,11535:up Ccl2,20296:up Ednrb,13618:up Ccl3,20302:up Mt2,17750:up Vdr,22337:down Htr2a,15558:down Fxyd1,56188:up Glp1r,14652:down Cd24a,12484:down Cd4,12504:up Stc1,20855:up Bmp4,12159:up Tgfb2,21808:down Ptgir,19222:up Mt1,17748:up                                                                              |
| positive regulation of hydrolase activity                                      | GO:0051345 | 8.19E-05 | 9.14E-04 | Htr2b,15559:down Ccl9,20308:up Ccl6,20305:up Ccl7,20306:up Ccl2,20296:up Ccl3,20302:up Vegfa,22339:down Htr2a,15558:down Pparg,19016:up Tnf,21926:up Fgfr1,14182:down Wnt5a,22418:down Ccl12,20293:up Ccl4,20303:up Ccl8,20307:up Sfrp2,20319:up Npnt,114249:up Fgfr2,14183:up F3,14066:up                                                              |
| response to molecule of bacterial origin                                       | GO:0002237 | 8.54E-05 | 9.51E-04 | Tnf,21926:up Adm,11535:up Cd24a,12484:down Mrc1,17533:up Wnt5a,22418:down Ccl2,20296:up Ccl12,20293:up Ptgs2,19225:down Slpi,20568:up Ednrb,13618:up Ankrd1,107765:down Cxcl9,17329:up Tnfrsf11b,18383:up Ptgir,19222:up                                                                                                                                |
| regulation of chondrocyte differentiation                                      | GO:0032330 | 8.73E-05 | 9.68E-04 | Fam101b,76566:down Loxl2,94352:down Efemp1,216616:up Adamts12,239337:down Grem1,23892:up Bmp4,12159:up                                                                                                                                                                                                                                                  |
| regulation of mesenchymal cell proliferation                                   | GO:0010464 | 8.73E-05 | 9.68E-04 | Fgfr1,14182:down Wnt5a,22418:down Vegfa,22339:down Bmpr1a,12166:down Fgfr2,14183:up Bmp4,12159:up                                                                                                                                                                                                                                                       |
| granulocyte chemotaxis                                                         | GO:0071621 | 8.84E-05 | 9.80E-04 | Ccl9,20308:up Ccl6,20305:up Ccl7,20306:up Ccl2,20296:up Ccl12,20293:up Ccl4,20303:up Ccl3,20302:up Ccl8,20307:up                                                                                                                                                                                                                                        |
| complement activation, classical pathway                                       | GO:0006958 | 8.97E-05 | 9.89E-04 | C1s1,50908:up Serpin1,12258:up C1s2,317677:up C3,12266:up C1rb,667277:up                                                                                                                                                                                                                                                                                |
| morphogenesis of an epithelial fold                                            | GO:0060571 | 8.97E-05 | 9.89E-04 | Egfr,13649:down Sulf1,240725:down Wnt5a,22418:down Fgfr2,14183:up Bmp4,12159:up                                                                                                                                                                                                                                                                         |
| bone trabecula morphogenesis                                                   | GO:0061430 | 9.06E-05 | 9.90E-04 | Sfrp1,20377:up Vegfa,22339:down Mmp2,17390:down Grem1,23892:up                                                                                                                                                                                                                                                                                          |
| regulation of establishment of planar polarity involved in neural tube closure | GO:0090178 | 9.06E-05 | 9.90E-04 | Sfrp2,20319:up Sfrp1,20377:up Ptk7,71461:down Wnt5a,22418:down                                                                                                                                                                                                                                                                                          |
| macrophage cytokine production                                                 | GO:0010934 | 9.06E-05 | 9.90E-04 | Gas6,14456:up Wnt5a,22418:down Tgfb2,21808:down Sema7a,20361:down                                                                                                                                                                                                                                                                                       |
| sequestering of triglyceride                                                   | GO:0030730 | 9.06E-05 | 9.90E-04 | Tnf,21926:up Pparg,19016:up Lpl,16956:up Enpp1,18605:down                                                                                                                                                                                                                                                                                               |
| planar cell polarity pathway involved in neural tube closure                   | GO:0090179 | 9.06E-05 | 9.90E-04 | Sfrp2,20319:up Sfrp1,20377:up Ptk7,71461:down Wnt5a,22418:down                                                                                                                                                                                                                                                                                          |
| regulation of protein import into nucleus                                      | GO:0042306 | 9.45E-05 | 1.03E-03 | Tnf,21926:up Gas6,14456:up Egfr,13649:down C1qtnf3,81799:down Bmpr1a,12166:down Ptgs2,19225:down Grem1,23892:up Igf1,16000:up Bmp4,12159:up Ceacam1,26365:up Sfrp2,20319:up                                                                                                                                                                             |
| urogenital system development                                                  | GO:0001655 | 9.58E-05 | 1.04E-03 | Aldh1a2,19378:up Crlf1,12931:down Vegfa,22339:down Mmp2,17390:down Fgfr1,14182:down Sfrp1,20377:up Wnt5a,22418:down Sulf1,240725:down Grem1,23892:up Adipoq,11450:up Bmp4,12159:up Igf1,16000:up Tnc,21923:down Ret,19713:up Npnt,114249:up Fgfr2,14183:up                                                                                              |
| regulation of immune response                                                  | GO:0050776 | 9.84E-05 | 1.07E-03 | Clec2d,93694:up C3,12266:up Sema7a,20361:down C1s1,50908:up Phf11a,219131:up Mmp2,17390:down Igf1,16000:up Pparg,19016:up Tnf,21926:up Cd24a,12484:down Hmox1,15368:up Wnt5a,22418:down Cd4,12504:up Tfrc,22042:up C1rb,667277:up Col3a1,12825:down Ceacam1,26365:up Serpin1,12258:up Tgfb2,21808:down C1s2,317677:up Il1rl1,17082:down Clec4e,56619:up |
| limb morphogenesis                                                             | GO:0035108 | 1.00E-04 | 1.08E-03 | Fgfr1,14182:down Wnt5a,22418:down Bmpr1a,12166:down Aldh1a2,19378:up Grem1,23892:up Bmp4,12159:up Chst11,58250:down Sfrp2,20319:up Crabp2,12904:down Rspo2,239405:up Fgfr2,14183:up                                                                                                                                                                     |
| appendage morphogenesis                                                        | GO:0035107 | 1.00E-04 | 1.08E-03 | Fgfr1,14182:down Wnt5a,22418:down Bmpr1a,12166:down Aldh1a2,19378:up Grem1,23892:up Bmp4,12159:up Chst11,58250:down Sfrp2,20319:up Crabp2,12904:down Rspo2,239405:up Fgfr2,14183:up                                                                                                                                                                     |
| negative regulation of BMP signaling pathway                                   | GO:0030514 | 1.00E-04 | 1.08E-03 | Fstl3,83554:down Htra3,78558:down Sfrp2,20319:up Sfrp1,20377:up Wnt5a,22418:down Grem1,23892:up                                                                                                                                                                                                                                                         |
| transition metal ion homeostasis                                               | GO:0055076 | 1.03E-04 | 1.11E-03 | Tf,22041:up Hmox1,15368:up Tfrc,22042:up Mt2,17750:up Epas1,13819:up Fam132b,227358:down Steap1,70358:down Mt1,17748:up Slc40a1,53945:up                                                                                                                                                                                                                |

|                                                          |            |          |          |                                                                                                                                                                                                                                                                                                                                                                                                                                                                                                                                                                                                                                                                                                                                                                                                                                                                                                                                                                                                                                                                                                                                                                                                                                                                                                                                                                                                                                                                                                                                                                                                                                                                                                                                                                                                                                                                                                                                                                                                                                                                                                                                                                                                                                                                                                                                                                                                                                                                                                                                                                                                                                                                                                                                                                                                                                                                                                                                                                                                                                                                                                                                                                                                                                                                                                                                                                                                                                                                                                                                                                                                                                                                                                                                               |
|----------------------------------------------------------|------------|----------|----------|-----------------------------------------------------------------------------------------------------------------------------------------------------------------------------------------------------------------------------------------------------------------------------------------------------------------------------------------------------------------------------------------------------------------------------------------------------------------------------------------------------------------------------------------------------------------------------------------------------------------------------------------------------------------------------------------------------------------------------------------------------------------------------------------------------------------------------------------------------------------------------------------------------------------------------------------------------------------------------------------------------------------------------------------------------------------------------------------------------------------------------------------------------------------------------------------------------------------------------------------------------------------------------------------------------------------------------------------------------------------------------------------------------------------------------------------------------------------------------------------------------------------------------------------------------------------------------------------------------------------------------------------------------------------------------------------------------------------------------------------------------------------------------------------------------------------------------------------------------------------------------------------------------------------------------------------------------------------------------------------------------------------------------------------------------------------------------------------------------------------------------------------------------------------------------------------------------------------------------------------------------------------------------------------------------------------------------------------------------------------------------------------------------------------------------------------------------------------------------------------------------------------------------------------------------------------------------------------------------------------------------------------------------------------------------------------------------------------------------------------------------------------------------------------------------------------------------------------------------------------------------------------------------------------------------------------------------------------------------------------------------------------------------------------------------------------------------------------------------------------------------------------------------------------------------------------------------------------------------------------------------------------------------------------------------------------------------------------------------------------------------------------------------------------------------------------------------------------------------------------------------------------------------------------------------------------------------------------------------------------------------------------------------------------------------------------------------------------------------------------------|
| positive regulation of metabolic process                 | GO:0009893 | 1.05E-04 | 1.13E-03 | Fstl3,83554:down lgfbp4,16010:up Adm,11535:up Sfrp4,20379:up C3,12266:up Lyl1,17095:up lgfbp3,16009:up Plk2,20620:down Trf,22041:up Cd24a,12484:down Wnt5a,22418:down Irlrn,16181:up Maob,10973:up Adipoq,11450:up Bmp4,12159:up lgf1,16000:up Tgfb2,21808:down Ptgfr,19222:up F3,14066:up Fgfr2,14183:up Htr2b,15559:down Prl2c2,18811:up Ccl6,20305:up Vdr,22337:down Htr2a,15558:down Slc40a1,53945:up Gas6,14456:up Egfr,13649:down Sfrp1,20377:up C1qtnf3,81799:down Tgfb3,21814:up Tfrc2,2042:up Serinc2,230779:down Ceacam1,26365:up Ccl8,20307:up Sfrp2,20319:up Fam20a,208659:down Npnt,114249:up Tnfrsf11b,18383:up lce1,218333:down Aldh1a2,19378:up Ccl2,20296:up Ccl7,20306:up Pdgc,54635:down Ednr,13618:up Epas1,13819:up Sema7a,20361:down Ddah1,69219:down Sdpr,20324:down Ptx3,19288:up Akr1c18,105349:up Ccl12,20293:up Bmpr1a,12166:down Ccl4,20303:up Tnc,21923:down Ret,19713:up Plpp3,67916:up Creb3l1,26427:down Kitl,17311:up Ccl9,20308:up Rasl11a,68895:up Inhba,16323:down Ccl3,20302:up Crfl1,12931:down Plod2,26432:down Vegfa,22339:down lgf2,16002:up Pparg,19016:up Tnf,21926:up Lmcd1,30937:up Glp1r,14652:down Fgfr1,14182:down Hmox1,15368:up Has2,15117:down Cd4,12504:up Ptgs2,19225:down Grem1,23892:up                                                                                                                                                                                                                                                                                                                                                                                                                                                                                                                                                                                                                                                                                                                                                                                                                                                                                                                                                                                                                                                                                                                                                                                                                                                                                                                                                                                                                                                                                                                                                                                                                                                                                                                                                                                                                                                                                                                                                                                                                                                                                                                                                                                                                                                                                                                                                                                                                                                                                                |
| regulation of leukocyte apoptotic process                | GO:200106  | 1.06E-04 | 1.13E-03 | Gas6,14456:up Cd24a,12484:down Wnt5a,22418:down Bmp4,12159:up Ceacam1,26365:up Cxcl12,20315:up Tgfb2,21808:down Kitl,17311:up                                                                                                                                                                                                                                                                                                                                                                                                                                                                                                                                                                                                                                                                                                                                                                                                                                                                                                                                                                                                                                                                                                                                                                                                                                                                                                                                                                                                                                                                                                                                                                                                                                                                                                                                                                                                                                                                                                                                                                                                                                                                                                                                                                                                                                                                                                                                                                                                                                                                                                                                                                                                                                                                                                                                                                                                                                                                                                                                                                                                                                                                                                                                                                                                                                                                                                                                                                                                                                                                                                                                                                                                                 |
| regulation of cell division                              | GO:0051302 | 1.07E-04 | 1.15E-03 | Htr2b,15559:down Tnf,21926:up Wnt5a,22418:down Sud2,71733:up Pdgc,54635:down Figf,14205:up lgf1,16000:up Bmp4,12159:up Sfrp2,20319:up Vegfa,22339:down Tgfb2,21808:down Vegfb,22340:up Fgfr2,14183:up lgf2,16002:up                                                                                                                                                                                                                                                                                                                                                                                                                                                                                                                                                                                                                                                                                                                                                                                                                                                                                                                                                                                                                                                                                                                                                                                                                                                                                                                                                                                                                                                                                                                                                                                                                                                                                                                                                                                                                                                                                                                                                                                                                                                                                                                                                                                                                                                                                                                                                                                                                                                                                                                                                                                                                                                                                                                                                                                                                                                                                                                                                                                                                                                                                                                                                                                                                                                                                                                                                                                                                                                                                                                           |
| cardiac muscle tissue morphogenesis                      | GO:0055008 | 1.11E-04 | 1.18E-03 | Ankrd1,107765:down Col11a1,12814:down Wnt5a,22418:down Tgfb2,21808:down Bmpr1a,12166:down Tgfb3,21814:up Fgfr2,14183:up                                                                                                                                                                                                                                                                                                                                                                                                                                                                                                                                                                                                                                                                                                                                                                                                                                                                                                                                                                                                                                                                                                                                                                                                                                                                                                                                                                                                                                                                                                                                                                                                                                                                                                                                                                                                                                                                                                                                                                                                                                                                                                                                                                                                                                                                                                                                                                                                                                                                                                                                                                                                                                                                                                                                                                                                                                                                                                                                                                                                                                                                                                                                                                                                                                                                                                                                                                                                                                                                                                                                                                                                                       |
| positive regulation of osteoblast differentiation        | GO:0045669 | 1.11E-04 | 1.18E-03 | Cthrc1,68588:down Sfrp2,20319:up Vegfa,22339:down Bmpr1a,12166:down Npnt,114249:up lgf1,16000:up Bmp4,12159:up                                                                                                                                                                                                                                                                                                                                                                                                                                                                                                                                                                                                                                                                                                                                                                                                                                                                                                                                                                                                                                                                                                                                                                                                                                                                                                                                                                                                                                                                                                                                                                                                                                                                                                                                                                                                                                                                                                                                                                                                                                                                                                                                                                                                                                                                                                                                                                                                                                                                                                                                                                                                                                                                                                                                                                                                                                                                                                                                                                                                                                                                                                                                                                                                                                                                                                                                                                                                                                                                                                                                                                                                                                |
| regulation of osteoclast differentiation                 | GO:0045670 | 1.11E-04 | 1.18E-03 | Fstl3,83554:down Ceacam1,26365:up Tnf,21926:up Clec2d,93694:up Lrrc17,74511:down Sfrp1,20377:up Ccl3,20302:up                                                                                                                                                                                                                                                                                                                                                                                                                                                                                                                                                                                                                                                                                                                                                                                                                                                                                                                                                                                                                                                                                                                                                                                                                                                                                                                                                                                                                                                                                                                                                                                                                                                                                                                                                                                                                                                                                                                                                                                                                                                                                                                                                                                                                                                                                                                                                                                                                                                                                                                                                                                                                                                                                                                                                                                                                                                                                                                                                                                                                                                                                                                                                                                                                                                                                                                                                                                                                                                                                                                                                                                                                                 |
| negative regulation of response to external stimulus     | GO:0032102 | 1.12E-04 | 1.18E-03 | Pparg,19016:up Kng1,16644:up Hmox1,15368:up C1qtnf3,81799:down Wnt5a,22418:down Aoah,27052:up Ccl12,20293:up Grem1,23892:up Adipoq,11450:up Ctla2a,13024:down Ceacam1,26365:up Serpine1,12258:up Cx3cr1,13051:down Serpine2,20720:up Cd109,235505:down                                                                                                                                                                                                                                                                                                                                                                                                                                                                                                                                                                                                                                                                                                                                                                                                                                                                                                                                                                                                                                                                                                                                                                                                                                                                                                                                                                                                                                                                                                                                                                                                                                                                                                                                                                                                                                                                                                                                                                                                                                                                                                                                                                                                                                                                                                                                                                                                                                                                                                                                                                                                                                                                                                                                                                                                                                                                                                                                                                                                                                                                                                                                                                                                                                                                                                                                                                                                                                                                                        |
| pharyngeal arch artery morphogenesis                     | GO:0061626 | 1.12E-04 | 1.18E-03 | Tgfb2,21808:down Bmpr1a,12166:down Bmp4,12159:up                                                                                                                                                                                                                                                                                                                                                                                                                                                                                                                                                                                                                                                                                                                                                                                                                                                                                                                                                                                                                                                                                                                                                                                                                                                                                                                                                                                                                                                                                                                                                                                                                                                                                                                                                                                                                                                                                                                                                                                                                                                                                                                                                                                                                                                                                                                                                                                                                                                                                                                                                                                                                                                                                                                                                                                                                                                                                                                                                                                                                                                                                                                                                                                                                                                                                                                                                                                                                                                                                                                                                                                                                                                                                              |
| regulation of prostatic bud formation                    | GO:0060685 | 1.12E-04 | 1.18E-03 | Sulf1,240725:down Wnt5a,22418:down Bmp4,12159:up                                                                                                                                                                                                                                                                                                                                                                                                                                                                                                                                                                                                                                                                                                                                                                                                                                                                                                                                                                                                                                                                                                                                                                                                                                                                                                                                                                                                                                                                                                                                                                                                                                                                                                                                                                                                                                                                                                                                                                                                                                                                                                                                                                                                                                                                                                                                                                                                                                                                                                                                                                                                                                                                                                                                                                                                                                                                                                                                                                                                                                                                                                                                                                                                                                                                                                                                                                                                                                                                                                                                                                                                                                                                                              |
| planar cell polarity pathway involved in axis elongation | GO:0003402 | 1.12E-04 | 1.18E-03 | Sfrp2,20319:up Sfrp1,20377:up Wnt5a,22418:down                                                                                                                                                                                                                                                                                                                                                                                                                                                                                                                                                                                                                                                                                                                                                                                                                                                                                                                                                                                                                                                                                                                                                                                                                                                                                                                                                                                                                                                                                                                                                                                                                                                                                                                                                                                                                                                                                                                                                                                                                                                                                                                                                                                                                                                                                                                                                                                                                                                                                                                                                                                                                                                                                                                                                                                                                                                                                                                                                                                                                                                                                                                                                                                                                                                                                                                                                                                                                                                                                                                                                                                                                                                                                                |
| tendon development                                       | GO:0035989 | 1.12E-04 | 1.18E-03 | Col5a1,12831:down Col11a1,12814:down Bmp4,12159:up                                                                                                                                                                                                                                                                                                                                                                                                                                                                                                                                                                                                                                                                                                                                                                                                                                                                                                                                                                                                                                                                                                                                                                                                                                                                                                                                                                                                                                                                                                                                                                                                                                                                                                                                                                                                                                                                                                                                                                                                                                                                                                                                                                                                                                                                                                                                                                                                                                                                                                                                                                                                                                                                                                                                                                                                                                                                                                                                                                                                                                                                                                                                                                                                                                                                                                                                                                                                                                                                                                                                                                                                                                                                                            |
| head development                                         | GO:0060322 | 1.19E-04 | 1.25E-03 | Inhba,16323:down Aldh1a2,19378:up Sema7a,20361:down Uchl5,56207:up Shroom4,208431:down Cxcl12,20315:up Mmp2,17390:down Cx3cr1,13051:down Serpine2,20720:up Egfr,13649:down Fgfr1,14182:down Ncam1,17967:down Sfrp1,20377:up Wnt5a,22418:down Bmpr1a,12166:down Bmp4,12159:up lgf1,16000:up Col3a1,12825:down Sfrp2,20319:up Pcdh19,279653:down Tgfb2,21808:down Aldh1a3,56847:down Fgfr2,14183:up                                                                                                                                                                                                                                                                                                                                                                                                                                                                                                                                                                                                                                                                                                                                                                                                                                                                                                                                                                                                                                                                                                                                                                                                                                                                                                                                                                                                                                                                                                                                                                                                                                                                                                                                                                                                                                                                                                                                                                                                                                                                                                                                                                                                                                                                                                                                                                                                                                                                                                                                                                                                                                                                                                                                                                                                                                                                                                                                                                                                                                                                                                                                                                                                                                                                                                                                             |
| single-organism process                                  | GO:0044699 | 1.20E-04 | 1.26E-03 | Fstl3,83554:down lgfbp4,16010:up Adm,11535:up Frl2,399558:down Tmem176b,65963:up Pxn1,67784:up Sfrp4,20379:up Ltbp2,16997:down Serpinh1,12406:down Lyl1,17095:up Gstt1,14871:up Blvrb,233016:up lgfbp3,16009:up lbsp,15891:up Plk2,20620:down Cd24a,12484:down Mme,17380:up Irlrn,16181:up Maoab,109731:up Bmp4,12159:up Hpse,15442:up Medag,70717:down Ptgfr,19222:up Fgfr2,14183:up Thbs2,21826:down Htr2b,15559:down Dram1,71712:up Ccl6,20305:up Gjb5,14622:down Anxa8,11752:down Aspn,66695:down Mt2,17750:up Cxcr6,80901:down Fam132b,227358:down Nabp1,109019:down Mmp2,17390:down Slc40a1,53945:up Egfr,13649:down Alpl,11647:up C1rb,667277:up Tfrc,22042:up Sneg,20618:up Ccl8,20307:up Serpina3g,20715:up Rspo2,239405:up Fam20a,208659:down Cdsn,386463:up Sytl3,80976:up Mt1,17748:up Col5a2,12832:down Aldh1a2,19378:up Ccl2,20296:up Ednr,13618:up Ampd3,11717:up Mmp13,17386:up Htra3,78558:down Tnfrsf12a,27279:down Uchl5,56207:up Sord,20322:up Clec4n,56620:up Shroom4,208431:down Steap1,70358:down Enpp3,209558:down Cdo1,12583:up Dok2,13449:up Mamdc2,17138:down Csrp2,13008:down Hvcn1,74096:up Ptx3,19288:up Ncam1,17967:down Ccl4,20303:up Chst11,58250:down Tmeff1,230157:down Vegfb,22340:up Aldh1a3,56847:up Plpp3,67916:up Mrcc2,17534:down Lrrc17,74511:down Lama2,16773:down Ccl9,20308:up Ptk7,71461:down Inhba,16323:down Bnc2,242509:down Tfpi2,21789:down Crfl1,12931:down C1s1,50908:up Plod2,26432:down Vegfa,22339:down Gfpt2,14584:down Serpine2,20720:up Cbr2,12409:up Nxn,18230:down lgf2,16002:up Kdelr3,105785:down Tmem176a,66058:up Tnf,21926:up Col1a2,12843:down Fxyd1,56188:up Fgfr1,14182:down Lpl,16956:up Sulf1,240725:down Sud2,71733:up Cd4,12504:up Col3a1,12825:down Tbx15,21384:down Serpine1,12258:up Emb,13723:up Uck2,80914:down Enpp1,18605:down Clec2d,93694:up Hpgd,15446:up C3,12266:up Enpp5,83965:up Ankrd1,107765:down Cx3cr1,13051:down Cd109,235505:down Ggt5,23887:up Loxl2,94352:down Loxl3,16950:down Trf,22041:up Cxcl14,57266:down Ceacam10,26366:up Wnt5a,22418:down Stc1,20855:up Mark1,226778:up Col8a1,12837:down Adipoq,11450:up Hal,15109:up lgf1,16000:up Crabp2,12904:down Mcoln2,68279:up Cxcl9,17329:up Tgfb2,21808:down F3,14066:up Clec4e,56619:up Cthrc1,68588:down Kng1,16644:up Prl2c2,18811:up Efemp1,216616:up Dpysl3,22240:down Ninj1,18081:up Saa3,20210:up Gdpd1,66569:up Vdr,22337:down Pdia5,72599:down Fabp4,11770:up Cxcl12,20315:up Htr2a,15558:down Slc16a4,229699:down Smoc2,64074:down Gas6,14456:up Col11a1,12814:down Sec23a,20334:down Sfrp1,20377:up C1qtnf3,81799:down Tgfb3,21814:up Fxyd2,11936:up Serinc2,230779:down Tll1,21892:down Ceacam1,26365:up Sfrp2,20319:up Pxdn,69675:down Tnfrsf11b,18383:up Prkar2b,19088:up Npnt,114249:up S100a1,20193:up Lyl9,17085:up Ccl7,20306:up Pdzrn3,55983:down Pdgc,54635:down Mgp,17313:up Figf,14205:up Sema7a,20361:down Epas1,13819:up Slc29a1,63959:up Marc1,66112:up Gpm6b,14758:up Ddah1,69219:down Postn,50706:down Npl,74091:up Man2a2,140481:up Akr1c18,105349:up Fabp5,16592:up Ccl12,20293:up Bmpr1a,12166:down Wisp1,22402:down Ank,11732:down Tnc,21923:down Gatm,67092:down Ret,19713:up Prg4,96875:down Sdf2l1,64136:up Pdxk,216134:up C1s2,317677:up Creb3l1,26427:down Irlrn1,17082:down Kitl,17311:up Fam101b,76566:down P4ha1,18451:down Hp,15439:up Aoah,27052:up Rasl11a,68895:up Plat,18791:down Ccl3,20302:up Ctla2a,13024:down Srp2,68792:down Prep,116847:up Adams12,239337:down Lrrc15,74488:down Anpep,16790:up Pparg,19016:up Glp1r,14652:down Lmcd1,30937:up Tnfrsf23,79201:down Has2,15117:down Hmox1,15368:up Ptgs2,19225:down Kcnj15,16516:down Grem1,23892:up Pcdh19,279653:down Col5a1,12831:down Mcoln3,171166:up Erf1,74155:down Tnfrsf9,21950:up |

|                                                             |            |          |          |                                                                                                                                                                                                                                                                                                                                                                                                                                                                                                    |
|-------------------------------------------------------------|------------|----------|----------|----------------------------------------------------------------------------------------------------------------------------------------------------------------------------------------------------------------------------------------------------------------------------------------------------------------------------------------------------------------------------------------------------------------------------------------------------------------------------------------------------|
| branching involved in prostate gland morphogenesis          | GO:0060442 | 1.22E-04 | 1.28E-03 | Sfrp1,20377:up Fgfr2,14183:up Igf1,16000:up Bmp4,12159:up                                                                                                                                                                                                                                                                                                                                                                                                                                          |
| convergent extension                                        | GO:0060026 | 1.22E-04 | 1.28E-03 | Sfrp2,20319:up Sfrp1,20377:up Ptk7,71461:down Wnt5a,22418:down                                                                                                                                                                                                                                                                                                                                                                                                                                     |
| positive regulation of striated muscle cell differentiation | GO:0051155 | 1.23E-04 | 1.29E-03 | Ccl8,20307:up Cxcl9,17329:up Cxcl12,20315:up Wisp1,22402:down Grem1,23892:up Igf1,16000:up Bmp4,12159:up                                                                                                                                                                                                                                                                                                                                                                                           |
| extrinsic apoptotic signaling pathway                       | GO:0097191 | 1.24E-04 | 1.30E-03 | Tnf,21926:up Tnfrsf23,79201:down Fgfr1,14182:down Sfrp1,20377:up Hmox1,15368:up Inhba,16323:down Igf1,16000:up Bmp4,12159:up Tnfrsf12a,27279:down Sfrp2,20319:up Tgfb2,21808:down Cx3cr1,13051:down Kitl,17311:up                                                                                                                                                                                                                                                                                  |
| regulation of myeloid leukocyte differentiation             | GO:0002761 | 1.28E-04 | 1.34E-03 | Fstl3,83554:down Tnf,21926:up Clec2d,93694:up Lrrc17,74511:down Sfrp1,20377:up Ccl3,20302:up Adipoq,11450:up Ceacam1,26365:up Kitl,17311:up                                                                                                                                                                                                                                                                                                                                                        |
| macrophage chemotaxis                                       | GO:0048246 | 1.30E-04 | 1.35E-03 | Ccl2,20296:up Ccl12,20293:up Cx3cr1,13051:down Ednrb,13618:up Ccl3,20302:up                                                                                                                                                                                                                                                                                                                                                                                                                        |
| regulation of vascular endothelial growth factor production | GO:0010574 | 1.30E-04 | 1.35E-03 | Sulf1,240725:down Ccl2,20296:up Hpse,15442:up C3,12266:up Ptgs2,19225:down                                                                                                                                                                                                                                                                                                                                                                                                                         |
| midbrain development                                        | GO:0030901 | 1.31E-04 | 1.35E-03 | Uchl5,56207:up Sfrp2,20319:up Fgfr1,14182:down Sfrp1,20377:up Wnt5a,22418:down Fgfr2,14183:up                                                                                                                                                                                                                                                                                                                                                                                                      |
| positive regulation of organ growth                         | GO:0046622 | 1.31E-04 | 1.35E-03 | Fgfr1,14182:down Ncam1,17967:down Bmpr1a,12166:down Wisp1,22402:down Fgfr2,14183:up Igf1,16000:up                                                                                                                                                                                                                                                                                                                                                                                                  |
| regulation of endocytosis                                   | GO:0030100 | 1.32E-04 | 1.37E-03 | Tnf,21926:up Pparg,19016:up Gas6,14456:up Trf,22041:up Ptx3,19288:up Wnt5a,22418:down Sfrp4,20379:up Ccl2,20296:up C3,12266:up Grem1,23892:up Adipoq,11450:up Vegfa,22339:down                                                                                                                                                                                                                                                                                                                     |
| embryonic appendage morphogenesis                           | GO:0035113 | 1.33E-04 | 1.37E-03 | Fgfr1,14182:down Wnt5a,22418:down Bmpr1a,12166:down Aldh1a2,19378:up Grem1,23892:up Bmp4,12159:up Chst11,58250:down Sfrp2,20319:up Crabp2,12904:down Rspo2,239405:up                                                                                                                                                                                                                                                                                                                               |
| BMP signaling pathway                                       | GO:0030509 | 1.33E-04 | 1.37E-03 | Fstl3,83554:down Sfrp1,20377:up Sulf1,240725:down Wnt5a,22418:down Bmpr1a,12166:down Tgfb3,21814:up Grem1,23892:up Bmp4,12159:up Htra3,78558:down Sfrp2,20319:up                                                                                                                                                                                                                                                                                                                                   |
| kidney epithelium development                               | GO:0072073 | 1.33E-04 | 1.37E-03 | Fgfr1,14182:down Sfrp1,20377:up Grem1,23892:up Bmp4,12159:up Adipoq,11450:up Crif1,12931:down Ret,19713:up Vegfa,22339:down Nptn,114249:up Fgfr2,14183:up                                                                                                                                                                                                                                                                                                                                          |
| embryonic limb morphogenesis                                | GO:0030326 | 1.33E-04 | 1.37E-03 | Fgfr1,14182:down Wnt5a,22418:down Bmpr1a,12166:down Aldh1a2,19378:up Grem1,23892:up Bmp4,12159:up Chst11,58250:down Sfrp2,20319:up Crabp2,12904:down Rspo2,239405:up                                                                                                                                                                                                                                                                                                                               |
| positive regulation of muscle cell differentiation          | GO:0051149 | 1.37E-04 | 1.40E-03 | Wisp1,22402:down Grem1,23892:up Igf1,16000:up Bmp4,12159:up Ccl8,20307:up Cxcl9,17329:up Cxcl12,20315:up Igf1,16000:up                                                                                                                                                                                                                                                                                                                                                                             |
| muscle cell migration                                       | GO:0014812 | 1.49E-04 | 1.52E-03 | Has2,15117:down Bmpr1a,12166:down Plat,18791:down Igf1,16000:up Adipoq,11450:up Postn,50706:down Igf1,16000:up F3,14066:up                                                                                                                                                                                                                                                                                                                                                                         |
| blood vessel remodeling                                     | GO:0001974 | 1.49E-04 | 1.52E-03 | Ceacam1,26365:up Vegfa,22339:down Tgfb2,21808:down Tgfb3,21814:up Igf1,16000:up Epas1,13819:up                                                                                                                                                                                                                                                                                                                                                                                                     |
| response to corticosteroid                                  | GO:0031960 | 1.50E-04 | 1.53E-03 | Tnf,21926:up Akr1c18,105349:up Alpl,11647:up Il1rn,16181:up Pappa,18491:down Cdo1,12583:up Bmp4,12159:up                                                                                                                                                                                                                                                                                                                                                                                           |
| positive regulation of behavior                             | GO:0048520 | 1.51E-04 | 1.54E-03 | Gas6,14456:up Cxcl14,57266:down Fgfr1,14182:down Wnt5a,22418:down Ccl2,20296:up Figf,14205:up Ccl4,20303:up Cxcl9,17329:up Cxcl12,20315:up Vegfa,22339:down                                                                                                                                                                                                                                                                                                                                        |
| oxoacid metabolic process                                   | GO:0043436 | 1.53E-04 | 1.55E-03 | P4ha1,18451:down Hpgd,15446:up Aldh1a2,19378:up C3,12266:up Marc3,66112:up Ddah1,69219:down Fabp4,11770:up Fam132b,227358:down Htr2a,15558:down Gfpt2,14584:down Npl,74091:up Cdo1,12583:up Mamdc2,71738:down Pparg,19016:up Ggt5,23887:up Akr1c18,105349:up Lpl,16956:up Sulf1,240725:down Ptgs2,19225:down Serinc2,230779:down Adipoq,11450:up Hal,15109:up Igf1,16000:up Chst11,58250:down Crabp2,12904:down Gatm,67092:down Hpse,15442:up Aldh1a3,56847:down Prkar2b,19088:up Enpp1,18605:down |
| negative regulation of peptidase activity                   | GO:0010466 | 1.54E-04 | 1.56E-03 | Kng1,16644:up Gas6,14456:up Slpi,20568:up Cst7,13011:up Tfpi2,21789:down Igf1,16000:up Sfrp2,20319:up Serping1,12258:up Serpina3g,20715:up Vegfa,22339:down Serpine2,20720:up Cd109,235505:down                                                                                                                                                                                                                                                                                                    |
| vascular endothelial growth factor production               | GO:0010573 | 1.55E-04 | 1.57E-03 | Sulf1,240725:down Ccl2,20296:up Hpse,15442:up C3,12266:up Ptgs2,19225:down                                                                                                                                                                                                                                                                                                                                                                                                                         |
| cytokine secretion                                          | GO:0050663 | 1.58E-04 | 1.60E-03 | Htr2b,15559:down Tnf,21926:up Gas6,14456:up Lpl,16956:up C1qtnf3,81799:down Wnt5a,22418:down Ccl3,20302:up Clec4n,56620:up Postn,50706:down Clec4e,56619:up Il1rl1,17082:down                                                                                                                                                                                                                                                                                                                      |
| regulation of lymphocyte chemotaxis                         | GO:1901623 | 1.60E-04 | 1.62E-03 | Cxcl14,57266:down Wnt5a,22418:down Ccl12,20293:up Ccl4,20303:up                                                                                                                                                                                                                                                                                                                                                                                                                                    |
| outflow tract morphogenesis                                 | GO:0003151 | 1.66E-04 | 1.67E-03 | Sfrp2,20319:up Plxnd1,67784:up Wnt5a,22418:down Tgfb2,21808:down Bmpr1a,12166:down Fgfr2,14183:up Bmp4,12159:up                                                                                                                                                                                                                                                                                                                                                                                    |
| iron ion homeostasis                                        | GO:0055072 | 1.66E-04 | 1.67E-03 | Trf,22041:up Fam132b,227358:down Hmox1,15368:up Steap1,70358:down Tfrc,22042:up Slc40a1,53945:up Epas1,13819:up                                                                                                                                                                                                                                                                                                                                                                                    |
| reactive nitrogen species metabolic process                 | GO:2001057 | 1.66E-04 | 1.67E-03 | Tnf,21926:up Ptx3,19288:up Ddah1,69219:down Egfr,13649:down Ptgs2,19225:down Marc3,66112:up Igf1,16000:up                                                                                                                                                                                                                                                                                                                                                                                          |
| regulation of epidermal cell differentiation                | GO:0045604 | 1.69E-04 | 1.69E-03 | Vdr,22337:down Tgfb2,21808:down Sfrp4,20379:up Cd109,235505:down Errfi1,74155:down Bmp4,12159:up                                                                                                                                                                                                                                                                                                                                                                                                   |
| myeloid cell homeostasis                                    | GO:0002262 | 1.71E-04 | 1.71E-03 | Cd24a,12484:down Hmox1,15368:up Inhba,16323:down Tgfb3,21814:up Ccl2,20296:up Ampd3,11717:up Epas1,13819:up Bmp4,12159:up Vegfa,22339:down Kitl,17311:up                                                                                                                                                                                                                                                                                                                                           |
| positive regulation of neuron projection development        | GO:0010976 | 1.73E-04 | 1.72E-03 | Fgfr1,14182:down Cd24a,12484:down Ptk7,71461:down Wnt5a,22418:down Dpysl3,22240:down Sema7a,20361:down Bmp4,12159:up Ankrd1,107765:down Tnfrsf12a,27279:down Crabp2,12904:down Ret,19713:up Cxcl12,20315:up Vegfa,22339:down Serpine2,20720:up                                                                                                                                                                                                                                                     |
| epithelial cell differentiation                             | GO:0030855 | 1.73E-04 | 1.72E-03 | Ptk7,71461:down Sfrp4,20379:up Ednrb,13618:up Vdr,22337:down Vegfa,22339:down Cd109,235505:down Pparg,19016:up Tnf,21926:up Fgfr1,14182:down Wnt5a,22418:down Stc1,20855:up Ptgs2,19225:down Grem1,23892:up Adipoq,11450:up Bmp4,12159:up Igf1,16000:up Ceacam1,26365:up Mcoln3,171166:up Tgfb2,21808:down Errfi1,74155:down Fgfr2,14183:up Kitl,17311:up                                                                                                                                          |
| calcium ion homeostasis                                     | GO:0055074 | 1.73E-04 | 1.72E-03 | Htr2b,15559:down Kng1,16644:up Adm,11535:up Ccl2,20296:up Ednrb,13618:up Ccl3,20302:up Vdr,22337:down Htr2a,15558:down Fxyd1,56188:up Glp1r,14652:down Cd24a,12484:down Cd4,12504:up Stc1,20855:up Bmp4,12159:up Tgfb2,21808:down Fam20a,208659:down Ptgir,19222:up                                                                                                                                                                                                                                |



|                                                                                           |            |          |          |                                                                                                                                                                                                                                                                                                                                                                                                                                                                                                    |
|-------------------------------------------------------------------------------------------|------------|----------|----------|----------------------------------------------------------------------------------------------------------------------------------------------------------------------------------------------------------------------------------------------------------------------------------------------------------------------------------------------------------------------------------------------------------------------------------------------------------------------------------------------------|
| negative regulation of cell development                                                   | GO:0010721 | 1.76E-04 | 1.75E-03 | Fam101b,76566:down Efemp1,216616:up Dpysl3,22240:down Ednrb,13618:up Postn,50706:down Plk2,20620:down Cd24a,12484:down Sfrp1,20377:up Tgfb2,21808:down Bmp4,12159:up Igf1,16000:up Col3a1,12825:down Sfrp2,20319:up Tgfb2,21808:down                                                                                                                                                                                                                                                               |
| negative regulation of response to wounding                                               | GO:1903035 | 1.77E-04 | 1.75E-03 | Pparg,19016:up Kng1,16644:up C1qtnf3,81799:down Aoah,27052:up Adipoq,11450:up Ceacam1,26365:up Ctla2a,13024:down Serpin1,12258:up Cx3cr1,13051:down Serpine2,20720:up Cd109,235505:down                                                                                                                                                                                                                                                                                                            |
| epidermis development                                                                     | GO:0008544 | 1.80E-04 | 1.78E-03 | Tnf,21926:up Fgfr1,14182:down Egfr,13649:down Inhba,16323:down Sfrp4,20379:up Ptgs2,19225:down Bmp4,12159:up Vdr,22337:down Mcoln3,171166:up Tgfb2,21808:down Hpse,15442:up Cd109,235505:down Errfi1,74155:down Fgfr2,14183:up                                                                                                                                                                                                                                                                     |
| developmental maturation                                                                  | GO:0021700 | 1.80E-04 | 1.78E-03 | Fam101b,76566:down Pparg,19016:up Fgfr1,14182:down Aldh1a2,19378:up Ptgs2,19225:down Ednrb,13618:up Grem1,23892:up Igf1,16000:up Epas1,13819:up Lyl1,17095:up Ret,19713:up Vegfa,22339:down Tgfb2,21808:down Mmp2,17390:down                                                                                                                                                                                                                                                                       |
| regulation of metal ion transport                                                         | GO:0010959 | 1.83E-04 | 1.80E-03 | Vdr,22337:down Cxcl12,20315:up Htr2a,15558:down Serpine2,20720:up Fxyd1,56188:up Glp1r,14652:down Cd4,12504:up Ccl12,20293:up Stc1,20855:up Ptgs2,19225:down Fxyd2,11936:up Ccl4,20303:up Bmp4,12159:up Igf1,16000:up Tgfb2,21808:down S100a1,20193:up                                                                                                                                                                                                                                             |
| negative regulation of viral life cycle                                                   | GO:1903901 | 1.83E-04 | 1.80E-03 | Ceacam1,26365:up Tnf,21926:up Ptx3,19288:up Oasl1,231655:up Slpi,20568:up Oas3,246727:up Ccl4,20303:up                                                                                                                                                                                                                                                                                                                                                                                             |
| blood coagulation                                                                         | GO:0007596 | 1.86E-04 | 1.83E-03 | Kng1,16644:up Gas6,14456:up C3,12266:up Pdgfc,54635:down Anxa8,11752:down Tfpi2,21789:down Ceacam1,26365:up Serpin1,12258:up Hpse,15442:up Serpine2,20720:up F3,14066:up                                                                                                                                                                                                                                                                                                                           |
| organic acid metabolic process                                                            | GO:0006082 | 1.89E-04 | 1.85E-03 | P4ha1,18451:down Hpgd,15446:up Aldh1a2,19378:up C3,12266:up Marc3,66112:up Ddah1,69219:down Fabp4,11770:up Fam132b,227358:down Htr2a,15558:down Gfpt2,14584:down Npl,74091:up Cdo1,12583:up Mamdc2,71738:down Pparg,19016:up Ggt5,23887:up Akr1c18,105349:up Lpl,16956:up Sulf1,240725:down Ptgs2,19225:down Serinc2,230779:down Adipoq,11450:up Hal,15109:up Igf1,16000:up Chst11,58250:down Crabp2,12904:down Gatm,67092:down Hpse,15442:up Aldh1a3,56847:down Prkar2b,19088:up Enpp1,18605:down |
| platelet-derived growth factor receptor signaling pathway                                 | GO:0048008 | 1.90E-04 | 1.86E-03 | Vegfa,22339:down Pdgfc,54635:down Ptgir,19222:up Plat,18791:down F3,14066:up Adipoq,11450:up                                                                                                                                                                                                                                                                                                                                                                                                       |
| prostate glandular acinus morphogenesis                                                   | GO:0060526 | 1.94E-04 | 1.88E-03 | Sfrp1,20377:up Fgfr2,14183:up Igf1,16000:up                                                                                                                                                                                                                                                                                                                                                                                                                                                        |
| branching involved in prostate gland morphogenesis                                        | GO:0060687 | 1.94E-04 | 1.88E-03 | Sfrp1,20377:up Fgfr2,14183:up Bmp4,12159:up                                                                                                                                                                                                                                                                                                                                                                                                                                                        |
| prostate epithelial cord arborization involved in prostate glandular acinus morphogenesis | GO:0060527 | 1.94E-04 | 1.88E-03 | Sfrp1,20377:up Fgfr2,14183:up Igf1,16000:up                                                                                                                                                                                                                                                                                                                                                                                                                                                        |
| regulation of mesodermal cell fate specification                                          | GO:0042661 | 1.94E-04 | 1.88E-03 | Sfrp2,20319:up Fgfr1,14182:down Bmpr1a,12166:down                                                                                                                                                                                                                                                                                                                                                                                                                                                  |
| negative regulation of gastrulation                                                       | GO:2000542 | 1.94E-04 | 1.88E-03 | Col5a2,12832:down Sfrp2,20319:up Col5a1,12831:down                                                                                                                                                                                                                                                                                                                                                                                                                                                 |
| inner ear development                                                                     | GO:0048839 | 1.97E-04 | 1.90E-03 | Cthrc1,68588:down Cxcl14,57266:down Fgfr1,14182:down Col11a1,12814:down Ptk7,71461:down Wnt5a,22418:down Igf1,16000:up Bmp4,12159:up Mcoln3,171166:up Aldh1a3,56847:down Fgfr2,14183:up                                                                                                                                                                                                                                                                                                            |
| regulation of bone mineralization                                                         | GO:0030500 | 2.01E-04 | 1.94E-03 | Fam101b,76566:down Ank,11732:down Gpm6b,14758:up Bmpr1a,12166:down Mgp,17313:up Grem1,23892:up Bmp4,12159:up                                                                                                                                                                                                                                                                                                                                                                                       |
| neuron projection development                                                             | GO:0031175 | 2.02E-04 | 1.95E-03 | Adm,11535:up Flrt2,399558:down Lama2,16773:down Efemp1,216616:up Plxnd1,67784:up Ptk7,71461:down Dpysl3,22240:down Sema7a,20361:down Ankrd1,107765:down Tnfrsf12a,27279:down Cxcl12,20315:up Postn,50706:down Vegfa,22339:down Mmp2,17390:down Serpine2,20720:up Plk2,20620:down Cd24a,12484:down Egfr,13649:down Fgfr1,14182:down Ncam1,17967:down Sfrp1,20377:up Wnt5a,22418:down Bmp4,12159:up Sfrp2,20319:up Crabp2,12904:down Tnc,21923:down Ret,19713:up Tgfb2,21808:down Fgfr2,14183:up     |
| regulation of homeostatic process                                                         | GO:0032844 | 2.03E-04 | 1.95E-03 | Htr2b,15559:down Inhba,16323:down Ednrb,13618:up Vegfa,22339:down Htr2a,15558:down Anpep,16790:up Tnf,21926:up Trf,22041:up Glp1r,14652:down Cd24a,12484:down Egfr,13649:down Cd4,12504:up Ptgs2,19225:down Tfrc,22042:up Bmp4,12159:up Ceacam1,26365:up Tgfb2,21808:down Tnfrsf11b,18383:up Kitl,17311:up                                                                                                                                                                                         |
| regulation of neurogenesis                                                                | GO:0050767 | 2.04E-04 | 1.96E-03 | Pr1c2,18811:up Flrt2,399558:down Efemp1,216616:up Plxnd1,67784:up Ptk7,71461:down Dpysl3,22240:down Ednrb,13618:up Sema7a,20361:down Ankrd1,107765:down Tnfrsf12a,27279:down Cxcl12,20315:up Vegfa,22339:down Cx3cr1,13051:down Serpine2,20720:up Pparg,19016:up Plk2,20620:down Trf,22041:up Fgfr1,14182:down Cd24a,12484:down Sfrp1,20377:up Wnt5a,22418:down Bmpr1a,12166:down Bmp4,12159:up Col3a1,12825:down Sfrp2,20319:up Crabp2,12904:down Ret,19713:up                                    |
| formation of primary germ layer                                                           | GO:0001704 | 2.05E-04 | 1.96E-03 | Col5a2,12832:down Fgfr1,14182:down Wnt5a,22418:down Inhba,16323:down Bmpr1a,12166:down Bmp4,12159:up Sfrp2,20319:up Col5a1,12831:down                                                                                                                                                                                                                                                                                                                                                              |
| morphogenesis of an epithelial bud                                                        | GO:0060572 | 2.06E-04 | 1.96E-03 | Sulf1,240725:down Wnt5a,22418:down Fgfr2,14183:up Bmp4,12159:up                                                                                                                                                                                                                                                                                                                                                                                                                                    |
| response to iron ion                                                                      | GO:0010039 | 2.06E-04 | 1.96E-03 | Trf,22041:up Hmox1,15368:up Tfrc,22042:up Slc40a1,53945:up                                                                                                                                                                                                                                                                                                                                                                                                                                         |
| regulation of hair follicle development                                                   | GO:0051797 | 2.06E-04 | 1.96E-03 | Tnf,21926:up Tgfb2,21808:down Inhba,16323:down Hpse,15442:up                                                                                                                                                                                                                                                                                                                                                                                                                                       |
| mesodermal cell fate commitment                                                           | GO:0001710 | 2.06E-04 | 1.96E-03 | Sfrp2,20319:up Fgfr1,14182:down Bmpr1a,12166:down Bmp4,12159:up                                                                                                                                                                                                                                                                                                                                                                                                                                    |
| retinoic acid metabolic process                                                           | GO:0042573 | 2.06E-04 | 1.96E-03 | Crabp2,12904:down Akr1c18,105349:up Aldh1a2,19378:up Aldh1a3,56847:down                                                                                                                                                                                                                                                                                                                                                                                                                            |
| hemostasis                                                                                | GO:0007599 | 2.07E-04 | 1.97E-03 | Kng1,16644:up Gas6,14456:up C3,12266:up Pdgfc,54635:down Anxa8,11752:down Tfpi2,21789:down Ceacam1,26365:up Serpin1,12258:up Hpse,15442:up Serpine2,20720:up F3,14066:up                                                                                                                                                                                                                                                                                                                           |
| sensory organ development                                                                 | GO:0007423 | 2.09E-04 | 1.98E-03 | Cthrc1,68588:down Col5a2,12832:down Ptk7,71461:down Inhba,16323:down Aldh1a2,19378:up Bnc2,242509:down Nin1,18081:up Vegfa,22339:down Cxcl14,57266:down Col11a1,12814:down Egfr,13649:down Fgfr1,14182:down Wnt5a,22418:down Col8a1,12837:down Bmp4,12159:up Igf1,16000:up Col5a1,12831:down Mcoln3,171166:up Tgfb2,21808:down Aldh1a3,56847:down Fgfr2,14183:up                                                                                                                                   |
| regulation of acute inflammatory response                                                 | GO:0002673 | 2.14E-04 | 2.02E-03 | Tnf,21926:up Pparg,19016:up Serpin1,12258:up C3,12266:up Ptgs2,19225:down Ednrb,13618:up                                                                                                                                                                                                                                                                                                                                                                                                           |

|                                                     |            |          |          |                                                                                                                                                                                                                                                                                                                                                                                                                                                                                                                                                                                                                                                                                                                                                                                                                                                                                                                                                                                                                                                                                                                                                                                                                                                                                                                                                                                                                                                                                                                                                                                                                                                                                                                                                                                                                                                                                                                                                                                                                                                                                                                                                                                                                                                                                                                                                                                                                                                                                                                                                                                                                                                                                                                                                                                                                                                                                                                                                                                                                                                                                                                                                                                                                                                                                                                                                                                                       |
|-----------------------------------------------------|------------|----------|----------|-------------------------------------------------------------------------------------------------------------------------------------------------------------------------------------------------------------------------------------------------------------------------------------------------------------------------------------------------------------------------------------------------------------------------------------------------------------------------------------------------------------------------------------------------------------------------------------------------------------------------------------------------------------------------------------------------------------------------------------------------------------------------------------------------------------------------------------------------------------------------------------------------------------------------------------------------------------------------------------------------------------------------------------------------------------------------------------------------------------------------------------------------------------------------------------------------------------------------------------------------------------------------------------------------------------------------------------------------------------------------------------------------------------------------------------------------------------------------------------------------------------------------------------------------------------------------------------------------------------------------------------------------------------------------------------------------------------------------------------------------------------------------------------------------------------------------------------------------------------------------------------------------------------------------------------------------------------------------------------------------------------------------------------------------------------------------------------------------------------------------------------------------------------------------------------------------------------------------------------------------------------------------------------------------------------------------------------------------------------------------------------------------------------------------------------------------------------------------------------------------------------------------------------------------------------------------------------------------------------------------------------------------------------------------------------------------------------------------------------------------------------------------------------------------------------------------------------------------------------------------------------------------------------------------------------------------------------------------------------------------------------------------------------------------------------------------------------------------------------------------------------------------------------------------------------------------------------------------------------------------------------------------------------------------------------------------------------------------------------------------------------------------------|
| positive regulation of phagocytosis                 | GO:0050766 | 2.14E-04 | 2.02E-03 | Tnf,21926:up Pparg,19016:up Gas6,14456:up Ptx3,19288:up Ccl2,20296:up C3,12266:up                                                                                                                                                                                                                                                                                                                                                                                                                                                                                                                                                                                                                                                                                                                                                                                                                                                                                                                                                                                                                                                                                                                                                                                                                                                                                                                                                                                                                                                                                                                                                                                                                                                                                                                                                                                                                                                                                                                                                                                                                                                                                                                                                                                                                                                                                                                                                                                                                                                                                                                                                                                                                                                                                                                                                                                                                                                                                                                                                                                                                                                                                                                                                                                                                                                                                                                     |
| cellular response to drug                           | GO:0035690 | 2.14E-04 | 2.02E-03 | Ankrd1,107765:down Gas6,14456:up Gstm1,14862:up Tfrc,22042:up Ccl4,20303:up Adipoq,11450:up                                                                                                                                                                                                                                                                                                                                                                                                                                                                                                                                                                                                                                                                                                                                                                                                                                                                                                                                                                                                                                                                                                                                                                                                                                                                                                                                                                                                                                                                                                                                                                                                                                                                                                                                                                                                                                                                                                                                                                                                                                                                                                                                                                                                                                                                                                                                                                                                                                                                                                                                                                                                                                                                                                                                                                                                                                                                                                                                                                                                                                                                                                                                                                                                                                                                                                           |
| protein kinase B signaling                          | GO:0043491 | 2.17E-04 | 2.04E-03 | Tnf,21926:up Gas6,14456:up Akr1c18,105349:up Egfr,13649:down C1qtnf3,81799:down Ccl12,20293:up gfl,16000:up Hpse,15442:up F3,14066:up gfl,16002:up                                                                                                                                                                                                                                                                                                                                                                                                                                                                                                                                                                                                                                                                                                                                                                                                                                                                                                                                                                                                                                                                                                                                                                                                                                                                                                                                                                                                                                                                                                                                                                                                                                                                                                                                                                                                                                                                                                                                                                                                                                                                                                                                                                                                                                                                                                                                                                                                                                                                                                                                                                                                                                                                                                                                                                                                                                                                                                                                                                                                                                                                                                                                                                                                                                                    |
| coagulation                                         | GO:0050817 | 2.19E-04 | 2.05E-03 | Kng1,16644:up Gas6,14456:up C3,12266:up Pdgrc,54635:down Anxa8,11752:down Tfpi2,21789:down Ceacam1,26365:up Serpin1,12258:up Hpse,15442:up Serpine2,20720:up F3,14066:up                                                                                                                                                                                                                                                                                                                                                                                                                                                                                                                                                                                                                                                                                                                                                                                                                                                                                                                                                                                                                                                                                                                                                                                                                                                                                                                                                                                                                                                                                                                                                                                                                                                                                                                                                                                                                                                                                                                                                                                                                                                                                                                                                                                                                                                                                                                                                                                                                                                                                                                                                                                                                                                                                                                                                                                                                                                                                                                                                                                                                                                                                                                                                                                                                              |
| regulation of smooth muscle cell migration          | GO:0014910 | 2.21E-04 | 2.07E-03 | Has2,15117:down Postn,50706:down Bmpr1a,12166:down lgfbp3,16009:up F3,14066:up gfl,16000:up Adipoq,11450:up                                                                                                                                                                                                                                                                                                                                                                                                                                                                                                                                                                                                                                                                                                                                                                                                                                                                                                                                                                                                                                                                                                                                                                                                                                                                                                                                                                                                                                                                                                                                                                                                                                                                                                                                                                                                                                                                                                                                                                                                                                                                                                                                                                                                                                                                                                                                                                                                                                                                                                                                                                                                                                                                                                                                                                                                                                                                                                                                                                                                                                                                                                                                                                                                                                                                                           |
| hair cycle process                                  | GO:0022405 | 2.22E-04 | 2.07E-03 | Tnf,21926:up Egfr,13649:down Inhba,16323:down Ptgs2,19225:down Hpse,15442:up Tgfb2,21808:down Fgfr2,14183:up Cd109,235505:down                                                                                                                                                                                                                                                                                                                                                                                                                                                                                                                                                                                                                                                                                                                                                                                                                                                                                                                                                                                                                                                                                                                                                                                                                                                                                                                                                                                                                                                                                                                                                                                                                                                                                                                                                                                                                                                                                                                                                                                                                                                                                                                                                                                                                                                                                                                                                                                                                                                                                                                                                                                                                                                                                                                                                                                                                                                                                                                                                                                                                                                                                                                                                                                                                                                                        |
| molting cycle process                               | GO:0022404 | 2.22E-04 | 2.07E-03 | Tnf,21926:up Egfr,13649:down Inhba,16323:down Ptgs2,19225:down Hpse,15442:up Tgfb2,21808:down Fgfr2,14183:up Cd109,235505:down                                                                                                                                                                                                                                                                                                                                                                                                                                                                                                                                                                                                                                                                                                                                                                                                                                                                                                                                                                                                                                                                                                                                                                                                                                                                                                                                                                                                                                                                                                                                                                                                                                                                                                                                                                                                                                                                                                                                                                                                                                                                                                                                                                                                                                                                                                                                                                                                                                                                                                                                                                                                                                                                                                                                                                                                                                                                                                                                                                                                                                                                                                                                                                                                                                                                        |
| hair follicle development                           | GO:001942  | 2.22E-04 | 2.07E-03 | Tnf,21926:up Egfr,13649:down Inhba,16323:down Ptgs2,19225:down Hpse,15442:up Tgfb2,21808:down Fgfr2,14183:up Cd109,235505:down                                                                                                                                                                                                                                                                                                                                                                                                                                                                                                                                                                                                                                                                                                                                                                                                                                                                                                                                                                                                                                                                                                                                                                                                                                                                                                                                                                                                                                                                                                                                                                                                                                                                                                                                                                                                                                                                                                                                                                                                                                                                                                                                                                                                                                                                                                                                                                                                                                                                                                                                                                                                                                                                                                                                                                                                                                                                                                                                                                                                                                                                                                                                                                                                                                                                        |
| negative regulation of hemopoiesis                  | GO:1903707 | 2.24E-04 | 2.08E-03 | Fstl3,83554:down Tmem176a,66058:up Clec2d,93694:up Lrrc17,74511:down Tmem176b,65963:up Sfrp1,20377:up Bmp4,12159:up Adipoq,11450:up Ceacam1,26365:up                                                                                                                                                                                                                                                                                                                                                                                                                                                                                                                                                                                                                                                                                                                                                                                                                                                                                                                                                                                                                                                                                                                                                                                                                                                                                                                                                                                                                                                                                                                                                                                                                                                                                                                                                                                                                                                                                                                                                                                                                                                                                                                                                                                                                                                                                                                                                                                                                                                                                                                                                                                                                                                                                                                                                                                                                                                                                                                                                                                                                                                                                                                                                                                                                                                  |
| positive regulation of cell projection organization | GO:0031346 | 2.27E-04 | 2.11E-03 | Pri2c2,18811:up Efemp1,216616:up Ptk7,71461:down Dpysl3,22240:down Sema7a,20361:down Ankrd1,107765:down Tnfrsf12a,27279:down Cxcl12,20315:up Vegfa,22339:down Serpine2,20720:up Cd24a,12484:down Fgfr1,14182:down Wnt5a,22418:down Bmp4,12159:up Crabp2,12904:down Ret,19713:up                                                                                                                                                                                                                                                                                                                                                                                                                                                                                                                                                                                                                                                                                                                                                                                                                                                                                                                                                                                                                                                                                                                                                                                                                                                                                                                                                                                                                                                                                                                                                                                                                                                                                                                                                                                                                                                                                                                                                                                                                                                                                                                                                                                                                                                                                                                                                                                                                                                                                                                                                                                                                                                                                                                                                                                                                                                                                                                                                                                                                                                                                                                       |
| positive regulation of homeostatic process          | GO:0032846 | 2.28E-04 | 2.11E-03 | Tnf,21926:up Trf,22041:up Egfr,13649:down Cd24a,12484:down Inhba,16323:down Cd4,12504:up Ptgs2,19225:down Tfrc,22042:up Ednrb,13618:up Bmp4,12159:up Ceacam1,26365:up Tgfb2,21808:down                                                                                                                                                                                                                                                                                                                                                                                                                                                                                                                                                                                                                                                                                                                                                                                                                                                                                                                                                                                                                                                                                                                                                                                                                                                                                                                                                                                                                                                                                                                                                                                                                                                                                                                                                                                                                                                                                                                                                                                                                                                                                                                                                                                                                                                                                                                                                                                                                                                                                                                                                                                                                                                                                                                                                                                                                                                                                                                                                                                                                                                                                                                                                                                                                |
| single-organism cellular process                    | GO:0044763 | 2.28E-04 | 2.11E-03 | Fstl3,83554:down lgfbp4,16010:up Adm,11535:up Flrt2,399558:down Tmem176b,65963:up Plxnd1,67784:up Sfrp4,20379:up Ltbp2,16997:down Serpinh1,12406:down Lyl1,17095:up Gstt1,14871:up Blvrb,233016:up lgfbp3,16009:up lbsp,15891:up Plk2,20620:down Cd24a,12484:down Mme,17380:up Il1rn,16181:up Maoab,109731:up Bmp4,12159:up Hpse,15442:up Medag,70717:down Ptgir,19222:up Fgfr2,14183:up Thbs2,21826:down Htr2b,15559:down Dram1,71712:up Ccl6,20305:up Gjb5,14622:down Aspn,66695:down Mt2,17750:up Cxcr6,80901:down Fam132b,227358:down Nabp1,109019:down Mmp2,17390:down Slc40a1,53945:up Egfr,13649:down Alpl,11647:up Tfrc,22042:up Sncg,20618:up Ccl8,20307:up Serpina3g,20715:up Rspo2,239405:up Synt13,80976:up Mt1,17748:up Col5a2,12832:down Aldh1a2,19378:up Ccl2,20296:up Ednrb,13618:up Ampd3,11717:up Mmp13,17386:up Htra3,78558:down Tnfrsf12a,27279:down Uchl5,56207:up Sord,20322:up Clec4n,56620:up Shroom4,208431:down Enpp3,209558:down Cdo1,12583:up Dok2,13449:up Mamdc2,71738:down Csrp2,13008:down Hvcn1,74096:up Ncam1,17967:down Ccl4,20303:up Chst11,58250:down Vegfb,22340:up Aldh1a3,56847:down Ppp3,67916:up Mrc2,17534:down Lrrc17,74511:down Lama2,16773:down Ccl9,20308:up Ptk7,71461:down Inhba,16323:down Crfl1,12931:down Plod2,26432:down Vegfa,22339:down Gfpt2,14584:down Serpine2,20720:up Cbr2,12409:up Nxn,18230:down gfl,16002:up Kdelr3,105785:down Tmem176a,66058:up Tnf,21926:up Col1a2,12843:down Fxyd1,56188:up Fgfr1,14182:down Lpl,16956:up Sulf1,240725:down SUSD2,71733:up Cd4,12504:up Col3a1,12825:down Emb,13723:up Uck2,80914:down Enpp1,18605:down Clec2d,93694:up Hpgd,15446:up C3,12266:up Enpp5,583965:up Ankrd1,107765:down Cx3cr1,13051:down Cd109,235505:down Ggt5,23887:up Loxl2,94352:down Loxl3,16950:down Trf,22041:up Cxcl14,57266:down Ceacam10,26366:up Wnt5a,22418:down Stc1,20855:up Mark1,226778:up Adipoq,11450:up Hal,15109:up gfl,16000:up Crabp2,12904:down Cxcl9,17329:up Tgfb2,21808:down F3,14066:up Clec4e,56619:up Cthrc1,68588:down Kng1,16644:up Pri2c2,18811:up Efemp1,216616:up Dpysl3,22240:down Saa3,20210:up Vdr,22337:down Pdla5,72599:down Fabp4,11770:up Cxcl12,20315:up Htr2a,15558:down Slc16a4,229699:down Smoc2,64074:down Gas6,14456:up Col11a1,12814:down Sfrp1,20377:up C1qtnf3,81799:down Tgfb3,21814:up Fxyd2,11936:up Serinc2,230779:down Tll1,21892:down Ceacam1,26365:up Sfrp2,20319:up Pxdn,69675:down Tnfrsf11b,18383:up Prkar2b,19088:up Npnt,114249:up S100a1,20193:up Ly9,17085:up Ccl7,20306:up Pdzn3,55983:down Pdgrc,54635:down Mgp,17313:up Figf,14205:up Sema7a,20361:down Epas1,13819:up Slc29a1,63959:up Marc1,66112:up Gpm6b,14758:up Ddah1,69219:down Postn,50706:down Npl,74091:up Man2a2,140481:up Akr1c18,105349:up Fabp5,16592:up Ccl12,20293:up Bmpr1a,12166:down Wisp1,22402:down Ank,11732:down Tnc,21923:down Gatm,67092:down Ret,19713:up Sdf211,64136:up Pdxk,216134:up Creb3l1,26427:down Il1r1,17082:down Kitl,17311:up Fam101b,76566:down P4ha1,18451:down Hp,15439:up Aoa8,27052:up Ras11a,68895:up Plat,18791:down Ccl3,20302:up Ctla2a,13024:down SrpX2,68792:down Prep1,116847:up Adams12,239337:down Lrrc15,74488:down Anpep,16790:up Pparg,19016:up Glp1r,14652:down Lmcd1,30937:up Tnfrsf23,79201:down Has2,15117:down Hmox1,15368:up Ptgs2,19225:down Kcnj15,16516:down Grem1,23892:up Mcoln3,171166:up Col5a1,12831:down Errf1,74155:down Tnfsf9,21950:up |
| ion transport                                       | GO:006811  | 2.29E-04 | 2.12E-03 | Sfrp4,20379:up Gpm6b,14758:up Steap1,70358:down Hvcn1,74096:up Trf,22041:up Ccl12,20293:up Stc1,20855:up Il1rn,16181:up Ccl4,20303:up Maob,109731:up Bmp4,12159:up lgf1,16000:up Ank,11732:down Mcoln2,68279:up Tgfb2,21808:down Htr2b,15559:down Vdr,22337:down Fam132b,227358:down Cxcl12,20315:up Htr2a,15558:down Serpine2,20720:up Slc16a4,229699:down Slc40a1,53945:up Pparg,19016:up Gas6,14456:up Tnf,21926:up Fxyd1,56188:up Glp1r,14652:down Fgfr1,14182:down Cd4,12504:up Ptgs2,19225:down Tfrc,22042:up Sncg,20618:up Fxyd2,11936:up Kcnj15,16516:down Serinc2,230779:down Mcoln3,171166:up Emb,13723:up Enpp1,18605:down S100a1,20193:up                                                                                                                                                                                                                                                                                                                                                                                                                                                                                                                                                                                                                                                                                                                                                                                                                                                                                                                                                                                                                                                                                                                                                                                                                                                                                                                                                                                                                                                                                                                                                                                                                                                                                                                                                                                                                                                                                                                                                                                                                                                                                                                                                                                                                                                                                                                                                                                                                                                                                                                                                                                                                                                                                                                                                 |
| embryonic organ development                         | GO:0048568 | 2.36E-04 | 2.18E-03 | Cthrc1,68588:down Adm,11535:up Ptk7,71461:down Gjb5,14622:down Aldh1a2,19378:up Epas1,13819:up Vegfa,22339:down Col11a1,12814:down Egfr,13649:down Fgfr1,14182:down Bmpr1a,12166:down Wnt5a,22418:down Bmp4,12159:up Chst11,58250:down Tbx15,21384:down Tgfb2,21808:down Aldh1a3,56847:down Fgfr2,14183:up Kitl,17311:up                                                                                                                                                                                                                                                                                                                                                                                                                                                                                                                                                                                                                                                                                                                                                                                                                                                                                                                                                                                                                                                                                                                                                                                                                                                                                                                                                                                                                                                                                                                                                                                                                                                                                                                                                                                                                                                                                                                                                                                                                                                                                                                                                                                                                                                                                                                                                                                                                                                                                                                                                                                                                                                                                                                                                                                                                                                                                                                                                                                                                                                                              |
| regulation of protein localization to nucleus       | GO:1900180 | 2.39E-04 | 2.20E-03 | Tnf,21926:up Gas6,14456:up Egfr,13649:down C1qtnf3,81799:down Bmpr1a,12166:down Ptgs2,19225:down Grem1,23892:up lgf1,16000:up Bmp4,12159:up Ceacam1,26365:up Sfrp2,20319:up Tgfb2,21808:down                                                                                                                                                                                                                                                                                                                                                                                                                                                                                                                                                                                                                                                                                                                                                                                                                                                                                                                                                                                                                                                                                                                                                                                                                                                                                                                                                                                                                                                                                                                                                                                                                                                                                                                                                                                                                                                                                                                                                                                                                                                                                                                                                                                                                                                                                                                                                                                                                                                                                                                                                                                                                                                                                                                                                                                                                                                                                                                                                                                                                                                                                                                                                                                                          |
| regulation of protein kinase B signaling            | GO:0051896 | 2.39E-04 | 2.20E-03 | Tnf,21926:up Gas6,14456:up Akr1c18,105349:up Egfr,13649:down C1qtnf3,81799:down lgf1,16000:up Hpse,15442:up F3,14066:up gfl,16002:up                                                                                                                                                                                                                                                                                                                                                                                                                                                                                                                                                                                                                                                                                                                                                                                                                                                                                                                                                                                                                                                                                                                                                                                                                                                                                                                                                                                                                                                                                                                                                                                                                                                                                                                                                                                                                                                                                                                                                                                                                                                                                                                                                                                                                                                                                                                                                                                                                                                                                                                                                                                                                                                                                                                                                                                                                                                                                                                                                                                                                                                                                                                                                                                                                                                                  |
| non-canonical Wnt signaling pathway                 | GO:0035567 | 2.40E-04 | 2.21E-03 | Cthrc1,68588:down Sfrp2,20319:up Sfrp1,20377:up Ptk7,71461:down Wnt5a,22418:down Sfrp4,20379:up                                                                                                                                                                                                                                                                                                                                                                                                                                                                                                                                                                                                                                                                                                                                                                                                                                                                                                                                                                                                                                                                                                                                                                                                                                                                                                                                                                                                                                                                                                                                                                                                                                                                                                                                                                                                                                                                                                                                                                                                                                                                                                                                                                                                                                                                                                                                                                                                                                                                                                                                                                                                                                                                                                                                                                                                                                                                                                                                                                                                                                                                                                                                                                                                                                                                                                       |
| cardiac muscle cell proliferation                   | GO:0060038 | 2.40E-04 | 2.21E-03 | Fgfr1,14182:down Ncam1,17967:down Tgfb2,21808:down Bmpr1a,12166:down Tgfb3,21814:up Fgfr2,14183:up                                                                                                                                                                                                                                                                                                                                                                                                                                                                                                                                                                                                                                                                                                                                                                                                                                                                                                                                                                                                                                                                                                                                                                                                                                                                                                                                                                                                                                                                                                                                                                                                                                                                                                                                                                                                                                                                                                                                                                                                                                                                                                                                                                                                                                                                                                                                                                                                                                                                                                                                                                                                                                                                                                                                                                                                                                                                                                                                                                                                                                                                                                                                                                                                                                                                                                    |

|                                                                 |            |          |          |                                                                                                                                                                                                                                                                                                                                                                                                                                                                                                                                                                                                                                                                                                                                                                                                                                                                                                                                                                                                                                                                 |
|-----------------------------------------------------------------|------------|----------|----------|-----------------------------------------------------------------------------------------------------------------------------------------------------------------------------------------------------------------------------------------------------------------------------------------------------------------------------------------------------------------------------------------------------------------------------------------------------------------------------------------------------------------------------------------------------------------------------------------------------------------------------------------------------------------------------------------------------------------------------------------------------------------------------------------------------------------------------------------------------------------------------------------------------------------------------------------------------------------------------------------------------------------------------------------------------------------|
| positive regulation of macromolecule metabolic process          | GO:0010604 | 2.47E-04 | 2.26E-03 | Fstl3,83554:down lgfbp4,16010:up Sfrp4,20379:up C3,12266:up Ly1,17095:up lgfbp3,16009:up Plk2,20620:down Trf,22041:up Cd24a,12484:down Wnt5a,22418:down Il1rn,16181:up Adipoq,11450:up Bmp4,12159:up lgf1,16000:up Tgfb2,21808:down Fgfr2,14183:up F3,14066:up Htr2b,15559:down Pr12c2,18811:up Ccl6,20305:up Vdr,22337:down Htr2a,15558:down Slc40a1,53945:up Gas6,14456:up Egfr,13649:down Sfrp1,20377:up C1qtnf3,81799:down Tgfr3,21814:up Tfrc,22042:up Ceacam1,26365:up Ccl8,20307:up Sfrp2,20319:up Fam20a,208659:down Npnt,114249:up Tnfrsf11b,18383:up lce1,218333:down Aldh1a2,19378:up Ccl2,20296:up Ccl7,20306:up Ednrb,13618:up Pdgfr,54635:down Epas1,13819:up Sema7a,20361:down Sdpr,20324:down Ccl12,20293:up Bmpr1a,12166:down Ccl4,20303:up Tnc,21923:down Ret,19713:up Plpp3,67916:up Creb3l1,26427:down Kitl,17311:up Ccl9,20308:up Rasl1a,68895:up Inhba,16323:down Ccl3,20302:up Crlf1,12931:down Vegfa,22339:down lgf2,16002:up Pparg,19016:up Tnf,21926:up Glp1r,14652:down Fgfr1,14182:down Has2,15117:down Cd4,12504:up Grem1,23892:up |
| cellular response to lipid                                      | GO:0071396 | 2.54E-04 | 2.32E-03 | Mrc1,17533:up Ptk7,71461:down Inhba,16323:down Ccl2,20296:up Aldh1a2,19378:up Ankrd1,107765:down Vdr,22337:down Mmp2,17390:down Pparg,19016:up Tnf,21926:up Akr1c18,105349:up Egfr,13649:down Sfrp1,20377:up Ccl12,20293:up Bmp4,12159:up lgf1,16000:up Ret,19713:up Ptgir,19222:up                                                                                                                                                                                                                                                                                                                                                                                                                                                                                                                                                                                                                                                                                                                                                                             |
| skin epidermis development                                      | GO:0098773 | 2.58E-04 | 2.35E-03 | Tnf,21926:up Egfr,13649:down Inhba,16323:down Ptgs2,19225:down Hpse,15442:up Tgfb2,21808:down Fgfr2,14183:up Cd109,235505:down                                                                                                                                                                                                                                                                                                                                                                                                                                                                                                                                                                                                                                                                                                                                                                                                                                                                                                                                  |
| granulocyte migration                                           | GO:0097530 | 2.58E-04 | 2.35E-03 | Ccl9,20308:up Ccl6,20305:up Ccl7,20306:up Ccl2,20296:up Ccl12,20293:up Ccl4,20303:up Ccl3,20302:up Ccl8,20307:up                                                                                                                                                                                                                                                                                                                                                                                                                                                                                                                                                                                                                                                                                                                                                                                                                                                                                                                                                |
| response to copper ion                                          | GO:0046688 | 2.62E-04 | 2.38E-03 | Sord,20322:up Loxl2,94352:down Mt2,17750:up Mt1,17748:up                                                                                                                                                                                                                                                                                                                                                                                                                                                                                                                                                                                                                                                                                                                                                                                                                                                                                                                                                                                                        |
| negative regulation of biomineral tissue development            | GO:0070168 | 2.62E-04 | 2.38E-03 | Fam101b,76566:down Gas6,14456:up Aspn,66695:down Grem1,23892:up                                                                                                                                                                                                                                                                                                                                                                                                                                                                                                                                                                                                                                                                                                                                                                                                                                                                                                                                                                                                 |
| regulation of calcium ion transport                             | GO:0051924 | 2.62E-04 | 2.38E-03 | Glp1r,14652:down Ccl12,20293:up Cd4,12504:up Ptgs2,19225:down Stc1,20855:up Ccl4,20303:up lgf1,16000:up Bmp4,12159:up Vdr,22337:down Cxcl12,20315:up Tgfb2,21808:down S100a1,20193:up                                                                                                                                                                                                                                                                                                                                                                                                                                                                                                                                                                                                                                                                                                                                                                                                                                                                           |
| response to biotic stimulus                                     | GO:0009607 | 2.63E-04 | 2.38E-03 | Adamts4,240913:down Adm,11535:up Hp,15439:up Mrc1,17533:up Ccl2,20296:up Slpi,20568:up Ednrb,13618:up lfit3,15959:up Ankrd1,107765:down Clec4n,56620:up Oas3,246727:up Tnf,21926:up Lmcd1,30937:up Ptx3,19288:up Cd24a,12484:down Wnt5a,22418:down Cd4,12504:up Ccl12,20293:up Ptgs2,19225:down Ceacam1,26365:up Cxc19,17329:up Oasl1,231655:up lfit1,15957:up Tnfrsf11b,18383:up Ptgir,19222:up Clec4e,56619:up                                                                                                                                                                                                                                                                                                                                                                                                                                                                                                                                                                                                                                                |
| regulation of phagocytosis                                      | GO:0050764 | 2.65E-04 | 2.40E-03 | Tnf,21926:up Pparg,19016:up Gas6,14456:up Ptx3,19288:up Ccl2,20296:up C3,12266:up Adipoq,11450:up                                                                                                                                                                                                                                                                                                                                                                                                                                                                                                                                                                                                                                                                                                                                                                                                                                                                                                                                                               |
| negative regulation of defense response                         | GO:0031348 | 2.73E-04 | 2.47E-03 | Pparg,19016:up Clec2d,93694:up C1qtnf3,81799:down Aoah,27052:up Adipoq,11450:up Ceacam1,26365:up Cta2a,13024:down Serp1g,12258:up Cx3cr1,13051:down lgf2,16002:up                                                                                                                                                                                                                                                                                                                                                                                                                                                                                                                                                                                                                                                                                                                                                                                                                                                                                               |
| negative regulation of phosphorylation                          | GO:0042326 | 2.78E-04 | 2.51E-03 | Flrt2,399558:down Sfrp4,20379:up Aspn,66695:down Fabp4,11770:up lgfbp3,16009:up Cd109,235505:down Lrrc15,74488:down Sfrp1,20377:up Grem1,23892:up Adipoq,11450:up Bmp4,12159:up lgf1,16000:up Ceacam1,26365:up Sfrp2,20319:up Prkar2b,19088:up Plpp3,67916:up Enpp1,18605:down Errf1,74155:down                                                                                                                                                                                                                                                                                                                                                                                                                                                                                                                                                                                                                                                                                                                                                                 |
| limb development                                                | GO:0060173 | 2.83E-04 | 2.54E-03 | Fgfr1,14182:down Wnt5a,22418:down Bmpr1a,12166:down Aldh1a2,19378:up Grem1,23892:up Bmp4,12159:up Chst11,58250:down Sfrp2,20319:up Crabp2,12904:down Rspo2,239405:up Fgfr2,14183:up                                                                                                                                                                                                                                                                                                                                                                                                                                                                                                                                                                                                                                                                                                                                                                                                                                                                             |
| appendage development                                           | GO:0048736 | 2.83E-04 | 2.54E-03 | Fgfr1,14182:down Wnt5a,22418:down Bmpr1a,12166:down Aldh1a2,19378:up Grem1,23892:up Bmp4,12159:up Chst11,58250:down Sfrp2,20319:up Crabp2,12904:down Rspo2,239405:up Fgfr2,14183:up                                                                                                                                                                                                                                                                                                                                                                                                                                                                                                                                                                                                                                                                                                                                                                                                                                                                             |
| response to other organism                                      | GO:0051707 | 2.89E-04 | 2.58E-03 | Adamts4,240913:down Adm,11535:up Hp,15439:up Mrc1,17533:up Ccl2,20296:up Slpi,20568:up Ednrb,13618:up lfit3,15959:up Ankrd1,107765:down Clec4n,56620:up Oas3,246727:up Tnf,21926:up Ptx3,19288:up Lmcd1,30937:up Cd24a,12484:down Wnt5a,22418:down Cd4,12504:up Ccl12,20293:up Ptgs2,19225:down Cxc19,17329:up Oasl1,231655:up lfit1,15957:up Tnfrsf11b,18383:up Ptgir,19222:up Clec4e,56619:up                                                                                                                                                                                                                                                                                                                                                                                                                                                                                                                                                                                                                                                                 |
| response to external biotic stimulus                            | GO:0043207 | 2.89E-04 | 2.58E-03 | Adamts4,240913:down Adm,11535:up Hp,15439:up Mrc1,17533:up Ccl2,20296:up Slpi,20568:up Ednrb,13618:up lfit3,15959:up Ankrd1,107765:down Clec4n,56620:up Oas3,246727:up Tnf,21926:up Ptx3,19288:up Lmcd1,30937:up Cd24a,12484:down Wnt5a,22418:down Cd4,12504:up Ccl12,20293:up Ptgs2,19225:down Cxc19,17329:up Oasl1,231655:up lfit1,15957:up Tnfrsf11b,18383:up Ptgir,19222:up Clec4e,56619:up                                                                                                                                                                                                                                                                                                                                                                                                                                                                                                                                                                                                                                                                 |
| neural crest cell development                                   | GO:0014032 | 2.89E-04 | 2.58E-03 | Htr2b,15559:down Ret,19713:up Bmpr1a,12166:down Aldh1a2,19378:up Ednrb,13618:up Sema7a,20361:down Kitl,17311:up                                                                                                                                                                                                                                                                                                                                                                                                                                                                                                                                                                                                                                                                                                                                                                                                                                                                                                                                                 |
| cardiac ventricle development                                   | GO:0003231 | 2.90E-04 | 2.58E-03 | Col11a1,12814:down Ptk7,71461:down Wnt5a,22418:down Bmpr1a,12166:down Tgfr3,21814:up Bmp4,12159:up Sfrp2,20319:up Tgfb2,21808:down Fgfr2,14183:up                                                                                                                                                                                                                                                                                                                                                                                                                                                                                                                                                                                                                                                                                                                                                                                                                                                                                                               |
| brain development                                               | GO:0007420 | 2.90E-04 | 2.58E-03 | Inhba,16323:down Aldh1a2,19378:up Sema7a,20361:down Uchl5,56207:up Shroom4,208431:down Cxc12,20315:up Cx3cr1,13051:down Serpine2,20720:up Egfr,13649:down Fgfr1,14182:down Sfrp1,20377:up Ncam1,17967:down Wnt5a,22418:down Bmpr1a,12166:down Bmp4,12159:up lgf1,16000:up Col3a1,12825:down Sfrp2,20319:up Pcdh19,279653:down Aldh1a3,56847:down Fgfr2,14183:up                                                                                                                                                                                                                                                                                                                                                                                                                                                                                                                                                                                                                                                                                                 |
| Wnt signaling pathway, planar cell polarity pathway             | GO:0060071 | 2.92E-04 | 2.59E-03 | Cthrc1,68588:down Sfrp2,20319:up Sfrp1,20377:up Ptk7,71461:down Wnt5a,22418:down                                                                                                                                                                                                                                                                                                                                                                                                                                                                                                                                                                                                                                                                                                                                                                                                                                                                                                                                                                                |
| regulation of establishment of planar polarity                  | GO:0090175 | 2.92E-04 | 2.59E-03 | Cthrc1,68588:down Sfrp2,20319:up Sfrp1,20377:up Ptk7,71461:down Wnt5a,22418:down                                                                                                                                                                                                                                                                                                                                                                                                                                                                                                                                                                                                                                                                                                                                                                                                                                                                                                                                                                                |
| positive regulation of mesenchymal cell proliferation           | GO:0002053 | 2.92E-04 | 2.59E-03 | Fgfr1,14182:down Wnt5a,22418:down Vegfa,22339:down Bmpr1a,12166:down Fgfr2,14183:up                                                                                                                                                                                                                                                                                                                                                                                                                                                                                                                                                                                                                                                                                                                                                                                                                                                                                                                                                                             |
| detection of mechanical stimulus involved in sensory perception | GO:0050974 | 2.92E-04 | 2.59E-03 | Tnf,21926:up Col11a1,12814:down Htr2a,15558:down Serpine2,20720:up lgf1,16000:up                                                                                                                                                                                                                                                                                                                                                                                                                                                                                                                                                                                                                                                                                                                                                                                                                                                                                                                                                                                |
| digestive tract morphogenesis                                   | GO:0048546 | 3.01E-04 | 2.65E-03 | Sfrp2,20319:up Egfr,13649:down Sfrp1,20377:up Wnt5a,22418:down Fgfr2,14183:up Bmp4,12159:up                                                                                                                                                                                                                                                                                                                                                                                                                                                                                                                                                                                                                                                                                                                                                                                                                                                                                                                                                                     |
| regulation of nitric oxide biosynthetic process                 | GO:0045428 | 3.01E-04 | 2.65E-03 | Tnf,21926:up Ptx3,19288:up Ddah1,69219:down Egfr,13649:down Ptgs2,19225:down lgf1,16000:up                                                                                                                                                                                                                                                                                                                                                                                                                                                                                                                                                                                                                                                                                                                                                                                                                                                                                                                                                                      |
| regulation of cardiac muscle tissue growth                      | GO:0055021 | 3.01E-04 | 2.65E-03 | Fgfr1,14182:down Ncam1,17967:down Bmpr1a,12166:down Wisp1,22402:down Fgfr2,14183:up lgf1,16000:up                                                                                                                                                                                                                                                                                                                                                                                                                                                                                                                                                                                                                                                                                                                                                                                                                                                                                                                                                               |

|                                                                                                  |             |          |          |                                                                                                                                                                                                                                                                                                                                                                                                                                                                                                                                                                                                                            |
|--------------------------------------------------------------------------------------------------|-------------|----------|----------|----------------------------------------------------------------------------------------------------------------------------------------------------------------------------------------------------------------------------------------------------------------------------------------------------------------------------------------------------------------------------------------------------------------------------------------------------------------------------------------------------------------------------------------------------------------------------------------------------------------------------|
| positive regulation of cellular component organization                                           | GO:0051130  | 3.02E-04 | 2.66E-03 | lce1,218333:down Flrt2,399558:down Sfrp4,20379:up Ccl2,20296:up C3,12266:up Sema7a,20361:down Ankrd1,107765:down Tnfrsf12a,27279:down lgfbp3,16009:up Trf,22041:up Ptx3,19288:up Cd24a,12484:down Wnt5a,22418:down Bmp4,12159:up lgf1,16000:up Crabp2,12904:down Cxcl9,17329:up Ret,19713:up Tgfb2,21808:down Thbs2,21826:down Prl2c2,18811:up Efemp1,216616:up Ptk7,71461:down Dpysl3,22240:down Srxp2,68792:down Cxd12,20315:up Plod2,26432:down Vegfa,22339:down Serpine2,20720:up lgf2,16002:up Pparg,19016:up Gas6,14456:up Tnf,21926:up Lmcd1,30937:up Fgfr1,14182:down Has2,15117:down Grem1,23892:up Ccl8,20307:up |
| mesenchymal-epithelial cell signaling                                                            | GO:0060638  | 3.06E-04 | 2.67E-03 | Tnc,21923:down Fgfr1,14182:down Wnt5a,22418:down                                                                                                                                                                                                                                                                                                                                                                                                                                                                                                                                                                           |
| positive regulation of cell migration involved in sprouting angiogenesis                         | GO:0090050  | 3.06E-04 | 2.67E-03 | Srxp2,68792:down Vegfa,22339:down Ptgs2,19225:down                                                                                                                                                                                                                                                                                                                                                                                                                                                                                                                                                                         |
| convergent extension involved in axis elongation                                                 | GO:0060028  | 3.06E-04 | 2.67E-03 | Sfrp2,20319:up Sfrp1,20377:up Wnt5a,22418:down                                                                                                                                                                                                                                                                                                                                                                                                                                                                                                                                                                             |
| membranous septum morphogenesis                                                                  | GO:0003149  | 3.06E-04 | 2.67E-03 | Tgfb2,21808:down Fgfr2,14183:up Bmp4,12159:up                                                                                                                                                                                                                                                                                                                                                                                                                                                                                                                                                                              |
| lung vasculature development                                                                     | GO:0060426  | 3.06E-04 | 2.67E-03 | Vegfa,22339:down Errfi1,74155:down lgf1,16000:up                                                                                                                                                                                                                                                                                                                                                                                                                                                                                                                                                                           |
| single-organism nuclear import                                                                   | GO:1902593  | 3.15E-04 | 2.73E-03 | Tnf,21926:up Gas6,14456:up Akr1c18,105349:up Egfr,13649:down C1qtnf3,81799:down Bmpr1a,12166:down Ptgs2,19225:down Grem1,23892:up lgf1,16000:up Bmp4,12159:up Ceacam1,26365:up Sfrp2,20319:up Tgfb2,21808:down                                                                                                                                                                                                                                                                                                                                                                                                             |
| protein import into nucleus                                                                      | GO:0006606  | 3.15E-04 | 2.73E-03 | Tnf,21926:up Gas6,14456:up Akr1c18,105349:up Egfr,13649:down C1qtnf3,81799:down Bmpr1a,12166:down Ptgs2,19225:down Grem1,23892:up lgf1,16000:up Bmp4,12159:up Ceacam1,26365:up Sfrp2,20319:up Tgfb2,21808:down                                                                                                                                                                                                                                                                                                                                                                                                             |
| protein targeting to nucleus                                                                     | GO:0044744  | 3.15E-04 | 2.73E-03 | Tnf,21926:up Gas6,14456:up Akr1c18,105349:up Egfr,13649:down C1qtnf3,81799:down Bmpr1a,12166:down Ptgs2,19225:down Grem1,23892:up lgf1,16000:up Bmp4,12159:up Ceacam1,26365:up Sfrp2,20319:up Tgfb2,21808:down                                                                                                                                                                                                                                                                                                                                                                                                             |
| signal transduction in absence of ligand                                                         | GO:0038034  | 3.16E-04 | 2.73E-03 | Tnf,21926:up Fgfr1,14182:down Tgfb2,21808:down Inhba,16323:down Cx3cr1,13051:down Kitl,17311:up lgf1,16000:up                                                                                                                                                                                                                                                                                                                                                                                                                                                                                                              |
| extrinsic apoptotic signaling pathway in absence of ligand                                       | GO:0097192  | 3.16E-04 | 2.73E-03 | Tnf,21926:up Fgfr1,14182:down Tgfb2,21808:down Inhba,16323:down Cx3cr1,13051:down Kitl,17311:up lgf1,16000:up                                                                                                                                                                                                                                                                                                                                                                                                                                                                                                              |
| regulation of chemokine production                                                               | GO:0032642  | 3.16E-04 | 2.73E-03 | Tnf,21926:up Lpl,16956:up C1qtnf3,81799:down Postn,50706:down Wnt5a,22418:down Il1r1,17082:down Adipoq,11450:up                                                                                                                                                                                                                                                                                                                                                                                                                                                                                                            |
| odontogenesis                                                                                    | GO:0042476  | 3.21E-04 | 2.76E-03 | Inhba,16323:down Bmpr1a,12166:down Aspn,66695:down Bmp4,12159:up Rspo2,239405:up Tnfrsf11b,18383:up Fam20a,208659:down Fgfr2,14183:up                                                                                                                                                                                                                                                                                                                                                                                                                                                                                      |
| leukocyte apoptotic process                                                                      | GO:0071887  | 3.21E-04 | 2.76E-03 | Gas6,14456:up Cd24a,12484:down Wnt5a,22418:down Bmp4,12159:up Ceacam1,26365:up Cxcl12,20315:up Tgfb2,21808:down Kitl,17311:up                                                                                                                                                                                                                                                                                                                                                                                                                                                                                              |
| response to vitamin K                                                                            | GO:0032571  | 3.26E-04 | 2.76E-03 | Gas6,14456:up Postn,50706:down                                                                                                                                                                                                                                                                                                                                                                                                                                                                                                                                                                                             |
| negative regulation of odontogenesis of dentin-containing tooth                                  | GO:0042489  | 3.26E-04 | 2.76E-03 | Rspo2,239405:up Tnfrsf11b,18383:up                                                                                                                                                                                                                                                                                                                                                                                                                                                                                                                                                                                         |
| cellular response to vitamin K                                                                   | GO:0071307  | 3.26E-04 | 2.76E-03 | Gas6,14456:up Postn,50706:down                                                                                                                                                                                                                                                                                                                                                                                                                                                                                                                                                                                             |
| lateral mesodermal cell fate specification                                                       | GO:0048377  | 3.26E-04 | 2.76E-03 | Fgfr1,14182:down Bmpr1a,12166:down                                                                                                                                                                                                                                                                                                                                                                                                                                                                                                                                                                                         |
| fibroblast growth factor receptor signaling pathway involved in orbitofrontal cortex development | GO:0035607  | 3.26E-04 | 2.76E-03 | Fgfr1,14182:down Fgfr2,14183:up                                                                                                                                                                                                                                                                                                                                                                                                                                                                                                                                                                                            |
| lateral mesodermal cell fate commitment                                                          | GO:0048372  | 3.26E-04 | 2.76E-03 | Fgfr1,14182:down Bmpr1a,12166:down                                                                                                                                                                                                                                                                                                                                                                                                                                                                                                                                                                                         |
| orbitofrontal cortex development                                                                 | GO:0021769  | 3.26E-04 | 2.76E-03 | Fgfr1,14182:down Fgfr2,14183:up                                                                                                                                                                                                                                                                                                                                                                                                                                                                                                                                                                                            |
| regulation of lateral mesodermal cell fate specification                                         | GO:0048378  | 3.26E-04 | 2.76E-03 | Fgfr1,14182:down Bmpr1a,12166:down                                                                                                                                                                                                                                                                                                                                                                                                                                                                                                                                                                                         |
| positive regulation of activation-induced cell death of T cells                                  | GO:0070237  | 3.26E-04 | 2.76E-03 | Ceacam1,26365:up Tgfb2,21808:down                                                                                                                                                                                                                                                                                                                                                                                                                                                                                                                                                                                          |
| regulation of neuron projection development                                                      | GO:0010975  | 3.26E-04 | 2.76E-03 | Efemp1,216616:up Plxnd1,67784:up Ptk7,71461:down Dpysl3,22240:down Sema7a,20361:down Ankrd1,107765:down Tnfrsf12a,27279:down Cxcl12,20315:up Vegfa,22339:down Serpine2,20720:up Plk2,20620:down Cd24a,12484:down Fgfr1,14182:down Sfrp1,20377:up Wnt5a,22418:down Bmp4,12159:up Sfrp2,20319:up Crabp2,12904:down Ret,19713:up                                                                                                                                                                                                                                                                                              |
| outflow tract septum morphogenesis                                                               | GO:0003148  | 3.27E-04 | 2.76E-03 | Tgfb2,21808:down Bmpr1a,12166:down Fgfr2,14183:up Bmp4,12159:up                                                                                                                                                                                                                                                                                                                                                                                                                                                                                                                                                            |
| heat generation                                                                                  | GO:00031649 | 3.27E-04 | 2.76E-03 | Tnf,21926:up Ptgs2,19225:down Il1rn,16181:up Ednrb,13618:up                                                                                                                                                                                                                                                                                                                                                                                                                                                                                                                                                                |
| nuclear import                                                                                   | GO:0051170  | 3.29E-04 | 2.77E-03 | Tnf,21926:up Gas6,14456:up Akr1c18,105349:up Egfr,13649:down C1qtnf3,81799:down Bmpr1a,12166:down Ptgs2,19225:down Grem1,23892:up lgf1,16000:up Bmp4,12159:up Ceacam1,26365:up Sfrp2,20319:up Tgfb2,21808:down                                                                                                                                                                                                                                                                                                                                                                                                             |
| mesenchymal cell proliferation                                                                   | GO:0010463  | 3.35E-04 | 2.81E-03 | Fgfr1,14182:down Wnt5a,22418:down Vegfa,22339:down Bmpr1a,12166:down Fgfr2,14183:up Bmp4,12159:up                                                                                                                                                                                                                                                                                                                                                                                                                                                                                                                          |

|                                                                                                                           |            |          |          |                                                                                                                                                                                                                                                                                                                                                                                                                                                                                      |
|---------------------------------------------------------------------------------------------------------------------------|------------|----------|----------|--------------------------------------------------------------------------------------------------------------------------------------------------------------------------------------------------------------------------------------------------------------------------------------------------------------------------------------------------------------------------------------------------------------------------------------------------------------------------------------|
| positive regulation of chemokine production                                                                               | GO:0032722 | 3.35E-04 | 2.81E-03 | Tnf,21926:up Lpl,16956:up Postn,50706:down Wnt5a,22418:down Il1rl1,17082:down Adipoq,11450:up                                                                                                                                                                                                                                                                                                                                                                                        |
| epithelial tube branching involved in lung morphogenesis                                                                  | GO:0060441 | 3.37E-04 | 2.83E-03 | Tnf,21926:up Tnc,21923:down Rspo2,239405:up Fgfr2,14183:up Bmp4,12159:up                                                                                                                                                                                                                                                                                                                                                                                                             |
| regulation of renal system process                                                                                        | GO:0098801 | 3.37E-04 | 2.83E-03 | Gas6,14456:up Stc1,20855:up Ednrb,13618:up Anep,16790:up Adipoq,11450:up                                                                                                                                                                                                                                                                                                                                                                                                             |
| tube formation                                                                                                            | GO:0035148 | 3.41E-04 | 2.86E-03 | Cthrc1,68588:down Adm,11535:up Sfrp1,20377:up Ptk7,71461:down Wnt5a,22418:down Grem1,23892:up Bmp4,12159:up Sfrp2,20319:up Ret,19713:up Vegfa,22339:down                                                                                                                                                                                                                                                                                                                             |
| cellular calcium ion homeostasis                                                                                          | GO:0006874 | 3.43E-04 | 2.87E-03 | Htr2b,15559:down Kng1,16644:up Adm,11535:up Ccl2,20296:up Ednrb,13618:up Ccl3,20302:up Vdr,22337:down Htr2a,15558:down Fxyd1,56188:up Glp1r,14652:down Cd24a,12484:down Cd4,12504:up Stc1,20855:up Bmp4,12159:up Tgfb2,21808:down Ptgir,19222:up                                                                                                                                                                                                                                     |
| response to bacterium                                                                                                     | GO:0009617 | 3.45E-04 | 2.87E-03 | Adams4,240913:down Adm,11535:up Hp,15439:up Mrc1,17533:up Ccl2,20296:up Slpi,20568:up Ednrb,13618:up Ankrd1,107765:down Tnf,21926:up Cd24a,12484:down Cd4,12504:up Ccl12,20293:up Wnt5a,22418:down Ptgs2,19225:down Cxcl9,17329:up Ptgir,19222:up Tnfrsf11b,18383:up Clec4e,56619:up                                                                                                                                                                                                 |
| divalent metal ion transport                                                                                              | GO:0070838 | 3.70E-04 | 3.08E-03 | Htr2b,15559:down Vdr,22337:down Cxcl12,20315:up Htr2a,15558:down Slc40a1,53945:up Gas6,14456:up Trf,22041:up Glp1r,14652:down Cd4,12504:up Ccl12,20293:up Stc1,20855:up Ptgs2,19225:down Ccl4,20303:up Bmp4,12159:up Igf1,16000:up Tgfb2,21808:down S100a1,20193:up                                                                                                                                                                                                                  |
| endochondral bone morphogenesis                                                                                           | GO:0060350 | 3.72E-04 | 3.09E-03 | Serpinh1,12406:down Alpl,11647:up Stc1,20855:up Bnc2,242509:down Mmp13,17386:up Bmp4,12159:up                                                                                                                                                                                                                                                                                                                                                                                        |
| chemokine production                                                                                                      | GO:0032602 | 3.74E-04 | 3.10E-03 | Tnf,21926:up Lpl,16956:up C1qtnf3,81799:down Postn,50706:down Wnt5a,22418:down Il1rl1,17082:down Adipoq,11450:up                                                                                                                                                                                                                                                                                                                                                                     |
| cellular transition metal ion homeostasis                                                                                 | GO:0046916 | 3.74E-04 | 3.10E-03 | Trf,22041:up Fam132b,227358:down Hmox1,15368:up Tfrc,22042:up Mt2,17750:up Slc40a1,53945:up Mt1,17748:up                                                                                                                                                                                                                                                                                                                                                                             |
| fat cell differentiation                                                                                                  | GO:0045444 | 3.76E-04 | 3.11E-03 | Pparg,19016:up Sfrp1,20377:up Wnt5a,22418:down Ptgs2,19225:down Igf1,16000:up Adipoq,11450:up Sfrp2,20319:up Fabp4,11770:up Vegfa,22339:down Htr2a,15558:down Medag,70717:down Enpp1,18605:down                                                                                                                                                                                                                                                                                      |
| cell-cell adhesion                                                                                                        | GO:0098609 | 3.78E-04 | 3.11E-03 | Fstl3,83554:down Ly9,17085:up Ccl2,20296:up Ctla2a,13024:down Srxp2,68792:down Cxcl12,20315:up Vegfa,22339:down Serpine2,20720:up Igf1,16000:up Tnf,21926:up Egfr,13649:down Cd24a,12484:down Ncam1,17967:down Has2,15117:down Wnt5a,22418:down Cd4,12504:up Il1rn,16181:up Tfrc,22042:up Adipoq,11450:up Bmp4,12159:up Igf1,16000:up Ceacam1,26365:up Pcdh19,279653:down Ret,19713:up Tgfb2,21808:down Cdsn,386463:up Npnt,114249:up Plpp3,67916:up Tnfsf9,21950:up Clec4e,56619:up |
| developmental process involved in reproduction                                                                            | GO:0003006 | 3.78E-04 | 3.12E-03 | Adm,11535:up Inhba,16323:down Gjb5,14622:down Epas1,13819:up Vdr,22337:down Cxcl12,20315:up Vegfa,22339:down Mmp2,17390:down Serpine2,20720:up Pparg,19016:up Alpl,11647:up Egfr,13649:down Sfrp1,20377:up Sulf1,240725:down Wnt5a,22418:down Bmpr1a,12166:down Ptgs2,19225:down Bmp4,12159:up Igf1,16000:up Sfrp2,20319:up Tnc,21923:down Fgfr2,14183:up Kitl,17311:up                                                                                                              |
| regulation of lymphocyte migration                                                                                        | GO:2000401 | 3.87E-04 | 3.18E-03 | Cxcl14,57266:down Cxcl12,20315:up Wnt5a,22418:down Ccl12,20293:up Ccl4,20303:up                                                                                                                                                                                                                                                                                                                                                                                                      |
| negative regulation of innate immune response                                                                             | GO:0045824 | 3.87E-04 | 3.18E-03 | Ceacam1,26365:up Pparg,19016:up Clec2d,93694:up Serpig1,12258:up Igf2,16002:up                                                                                                                                                                                                                                                                                                                                                                                                       |
| divalent inorganic cation transport                                                                                       | GO:0072511 | 3.94E-04 | 3.23E-03 | Htr2b,15559:down Vdr,22337:down Cxcl12,20315:up Htr2a,15558:down Slc40a1,53945:up Gas6,14456:up Trf,22041:up Glp1r,14652:down Cd4,12504:up Ccl12,20293:up Stc1,20855:up Ptgs2,19225:down Ccl4,20303:up Bmp4,12159:up Igf1,16000:up Tgfb2,21808:down S100a1,20193:up                                                                                                                                                                                                                  |
| positive regulation of cardiac muscle cell differentiation                                                                | GO:2000727 | 4.03E-04 | 3.29E-03 | Wisp1,22402:down Grem1,23892:up Igf1,16000:up Bmp4,12159:up                                                                                                                                                                                                                                                                                                                                                                                                                          |
| positive regulation of lymphocyte apoptotic process                                                                       | GO:0070230 | 4.03E-04 | 3.29E-03 | Ceacam1,26365:up Cd24a,12484:down Wnt5a,22418:down Tgfb2,21808:down                                                                                                                                                                                                                                                                                                                                                                                                                  |
| adaptive immune response based on somatic recombination of immune receptors built from immunoglobulin superfamily domains | GO:0002460 | 4.29E-04 | 3.50E-03 | Tnf,21926:up Cd24a,12484:down Ly9,17085:up Cd4,12504:up C3,12266:up C1rb,667277:up Tfrc,22042:up Serpig1,12258:up C1s1,50908:up Vegfa,22339:down C1s2,317677:up Il1rl1,17082:down                                                                                                                                                                                                                                                                                                    |
| salivary gland morphogenesis                                                                                              | GO:0007435 | 4.43E-04 | 3.61E-03 | Tnf,21926:up Fgfr1,14182:down Egfr,13649:down Plxnd1,67784:up Fgfr2,14183:up                                                                                                                                                                                                                                                                                                                                                                                                         |
| negative regulation of viral genome replication                                                                           | GO:0045071 | 4.43E-04 | 3.61E-03 | Ceacam1,26365:up Tnf,21926:up Oas1,231655:up Slpi,20568:up Oas3,246727:up                                                                                                                                                                                                                                                                                                                                                                                                            |
| negative regulation of protein modification process                                                                       | GO:0031400 | 4.46E-04 | 3.63E-03 | Flrt2,399558:down Sfrp4,20379:up Aspn,66695:down Fabp4,11770:up Igf1,16000:up Cd109,235505:down Lrrc15,74488:down Nxn,18230:down Tnf,21926:up Sfrp1,20377:up Grem1,23892:up Adipoq,11450:up Bmp4,12159:up Igf1,16000:up Ceacam1,26365:up Sfrp2,20319:up Prkar2b,19088:up Plpp3,67916:up Errfi1,74155:down Enpp1,18605:down                                                                                                                                                           |
| diterpenoid biosynthetic process                                                                                          | GO:0016102 | 4.53E-04 | 3.65E-03 | Akr1c18,105349:up Aldh1a2,19378:up Aldh1a3,56847:down                                                                                                                                                                                                                                                                                                                                                                                                                                |
| cellular response to interferon-alpha                                                                                     | GO:0035457 | 4.53E-04 | 3.65E-03 | Gas6,14456:up Iffit1,15957:up Iffit3,15959:up                                                                                                                                                                                                                                                                                                                                                                                                                                        |
| extracellular fibril organization                                                                                         | GO:0043206 | 4.53E-04 | 3.65E-03 | Ltbp2,16997:down Col5a1,12831:down Col3a1,12825:down                                                                                                                                                                                                                                                                                                                                                                                                                                 |
| regulation of alkaline phosphatase activity                                                                               | GO:0010692 | 4.53E-04 | 3.65E-03 | Tnf,21926:up Tgfb2,21808:down Npnt,114249:up                                                                                                                                                                                                                                                                                                                                                                                                                                         |
| retinoic acid biosynthetic process                                                                                        | GO:0002138 | 4.53E-04 | 3.65E-03 | Akr1c18,105349:up Aldh1a2,19378:up Aldh1a3,56847:down                                                                                                                                                                                                                                                                                                                                                                                                                                |
| regulation of fever generation                                                                                            | GO:0031620 | 4.53E-04 | 3.65E-03 | Tnf,21926:up Ptgs2,19225:down Ednrb,13618:up                                                                                                                                                                                                                                                                                                                                                                                                                                         |
| regulation of heart growth                                                                                                | GO:0060420 | 4.55E-04 | 3.67E-03 | Fgfr1,14182:down Ncam1,17967:down Bmpr1a,12166:down Wisp1,22402:down Fgfr2,14183:up Igf1,16000:up                                                                                                                                                                                                                                                                                                                                                                                    |

|                                                             |            |          |          |                                                                                                                                                                                                                                                                                                                                                                                                                                                                                                                                |
|-------------------------------------------------------------|------------|----------|----------|--------------------------------------------------------------------------------------------------------------------------------------------------------------------------------------------------------------------------------------------------------------------------------------------------------------------------------------------------------------------------------------------------------------------------------------------------------------------------------------------------------------------------------|
| negative regulation of transport                            | GO:0051051 | 4.84E-04 | 3.89E-03 | Sfrp4,20379:up Gpm6b,14758:up Htr2a,15558:down Serpine2,20720:up Anpep,16790:up Kdelr3,105785:down Gas6,14456:up Pparg,19016:up Tnf,21926:up Hmox1,15368:up Sfrp1,20377:up C1qtnf3,81799:down Il1rn,16181:up Stc1,20855:up Ptgs2,19225:down Adipoq,11450:up Maob,109731:up Tgfb2,21808:down Enpp1,18605:down                                                                                                                                                                                                                   |
| negative regulation of molecular function                   | GO:0044092 | 4.88E-04 | 3.92E-03 | Kng1,16644:up Flrt2,399558:down Hp,15439:up Sfrp4,20379:up Slpi,20568:up Cst7,13011:up Aspn,66695:down Tfpi2,21789:down Fabp4,11770:up Vegfa,22339:down Serpine2,20720:up Cd109,235505:down Lrrc15,74488:down Tnf,21926:up Gas6,14456:up Pparg,19016:up Ptx3,19288:up Hmox1,15368:up Sfrp1,20377:up Adipoq,11450:up Bmp4,12159:up Igf1,16000:up Ceacam1,26365:up Sfrp2,20319:up Serping1,12258:up Serpina3g,20715:up Tgfb2,21808:down Prkar2b,19088:up Erf1,74155:down                                                         |
| hematopoietic stem cell proliferation                       | GO:0071425 | 4.91E-04 | 3.93E-03 | Sfrp2,20319:up Prg4,96875:down Wnt5a,22418:down Kitl,17311:up                                                                                                                                                                                                                                                                                                                                                                                                                                                                  |
| negative regulation of proteolysis                          | GO:0045861 | 4.94E-04 | 3.96E-03 | Kng1,16644:up Gas6,14456:up Slpi,20568:up Cst7,13011:up Plat,18791:down Tfpi2,21789:down Igf1,16000:up Ctla2a,13024:down Sfrp2,20319:up Serping1,12258:up Serpina3g,20715:up Vegfa,22339:down Serpine2,20720:up Cd109,235505:down                                                                                                                                                                                                                                                                                              |
| regulation of peptidase activity                            | GO:0052547 | 5.00E-04 | 4.00E-03 | Tnf,21926:up Pparg,19016:up Kng1,16644:up Gas6,14456:up Slpi,20568:up Cst7,13011:up Tfpi2,21789:down Igf1,16000:up Sfrp2,20319:up Serping1,12258:up Serpina3g,20715:up Vegfa,22339:down Serpine2,20720:up Cd109,235505:down F3,14066:up                                                                                                                                                                                                                                                                                        |
| regulation of protein localization                          | GO:0032880 | 5.04E-04 | 4.02E-03 | Htr2b,15559:down Ice1,218333:down Ccl2,20296:up Ccl3,20302:up Mmp13,17386:up Ankrd1,107765:down Gpm6b,14758:up Clec4n,56620:up Postn,50706:down Lrrc15,74488:down Kdelr3,105785:down Gas6,14456:up Tnf,21926:up Gip1r,14652:down Egfr,13649:down Lpl,16956:up Sfrp1,20377:up C1qtnf3,81799:down Wnt5a,22418:down Bmpr1a,12166:down Ptgs2,19225:down Grem1,23892:up Adipoq,11450:up Bmp4,12159:up Igf1,16000:up Ceacam1,26365:up Sfrp2,20319:up Tgfb2,21808:down Il1r1,17082:down Clec4e,56619:up                               |
| negative regulation of anion transport                      | GO:1903792 | 5.05E-04 | 4.02E-03 | Tnf,21926:up Gpm6b,14758:up Sfrp4,20379:up Il1rn,16181:up Maob,109731:up                                                                                                                                                                                                                                                                                                                                                                                                                                                       |
| cellular iron ion homeostasis                               | GO:0006879 | 5.05E-04 | 4.02E-03 | Trf,22041:up Fam132b,227358:down Hmox1,15368:up Tfrc,22042:up Slc40a1,53945:up                                                                                                                                                                                                                                                                                                                                                                                                                                                 |
| cardiac chamber development                                 | GO:0003205 | 5.20E-04 | 4.13E-03 | Col11a1,12814:down Plxnd1,67784:up Ptk7,71461:down Wnt5a,22418:down Bmpr1a,12166:down Tgfb3,21814:up Bmp4,12159:up Sfrp2,20319:up Tgfb2,21808:down Fgfr2,14183:up                                                                                                                                                                                                                                                                                                                                                              |
| neuron development                                          | GO:0048666 | 5.36E-04 | 4.25E-03 | Cthrc1,68588:down Adm,11535:up Flrt2,399558:down Lama2,16773:down Efemp1,216616:up Plxnd1,67784:up Ptk7,71461:down Dpysl3,22240:down Ednrb,13618:up Sema7a,20361:down Ankrd1,107765:down Tnfrsf12a,27279:down Cxcl12,20315:up Postn,50706:down Vegfa,22339:down Mmp2,17390:down Serpin2,20720:up Plk2,20620:down Cd24a,12484:down Egfr,13649:down Fgfr1,14182:down Ncam1,17967:down Sfrp1,20377:up Wnt5a,22418:down Bmp4,12159:up Sfrp2,20319:up Crabp2,12904:down Tnc,21923:down Ret,19713:up Tgfb2,21808:down Fgfr2,14183:up |
| regulation of nucleocytoplasmic transport                   | GO:0046822 | 5.52E-04 | 4.37E-03 | Tnf,21926:up Gas6,14456:up Egfr,13649:down C1qtnf3,81799:down Bmpr1a,12166:down Ptgs2,19225:down Grem1,23892:up Igf1,16000:up Bmp4,12159:up Ceacam1,26365:up Sfrp2,20319:up                                                                                                                                                                                                                                                                                                                                                    |
| artery morphogenesis                                        | GO:0048844 | 5.53E-04 | 4.37E-03 | Hpgd,15446:up Vegfa,22339:down Tgfb2,21808:down Bmpr1a,12166:down Col3a1,12825:down Bmp4,12159:up                                                                                                                                                                                                                                                                                                                                                                                                                              |
| nitric oxide biosynthetic process                           | GO:0006809 | 5.53E-04 | 4.37E-03 | Tnf,21926:up Ptx3,19288:up Ddah1,69219:down Egfr,13649:down Ptgs2,19225:down Igf1,16000:up                                                                                                                                                                                                                                                                                                                                                                                                                                     |
| molting cycle                                               | GO:0042303 | 5.55E-04 | 4.38E-03 | Tnf,21926:up Egfr,13649:down Inhba,16323:down Ptgs2,19225:down Hpse,15442:up Tgfb2,21808:down Fgfr2,14183:up Cd109,235505:down                                                                                                                                                                                                                                                                                                                                                                                                 |
| hair cycle                                                  | GO:0042633 | 5.55E-04 | 4.38E-03 | Tnf,21926:up Egfr,13649:down Inhba,16323:down Ptgs2,19225:down Hpse,15442:up Tgfb2,21808:down Fgfr2,14183:up Cd109,235505:down                                                                                                                                                                                                                                                                                                                                                                                                 |
| artery development                                          | GO:0060840 | 5.58E-04 | 4.39E-03 | Hpgd,15446:up Plxnd1,67784:up Vegfa,22339:down Tgfb2,21808:down Bmpr1a,12166:down Col3a1,12825:down Bmp4,12159:up                                                                                                                                                                                                                                                                                                                                                                                                              |
| temperature homeostasis                                     | GO:0001659 | 5.73E-04 | 4.50E-03 | Tnf,21926:up Htr2a,15558:down Ptgs2,19225:down Il1rn,16181:up Ednrb,13618:up                                                                                                                                                                                                                                                                                                                                                                                                                                                   |
| positive regulation of nitric oxide biosynthetic process    | GO:0045429 | 5.73E-04 | 4.50E-03 | Tnf,21926:up Ptx3,19288:up Ddah1,69219:down Egfr,13649:down Ptgs2,19225:down                                                                                                                                                                                                                                                                                                                                                                                                                                                   |
| cell-matrix adhesion                                        | GO:0007160 | 5.75E-04 | 4.51E-03 | Grem1,23892:up Nin1,18081:up Col3a1,12825:down Gpm6b,14758:up Sned1,208777:up Postn,50706:down Hpse,15442:up Vegfa,22339:down Npnt,114249:up Adams12,239337:down                                                                                                                                                                                                                                                                                                                                                               |
| response to lipopolysaccharide                              | GO:0032496 | 5.75E-04 | 4.51E-03 | Tnf,21926:up Adm,11535:up Mrc1,17533:up Ccl2,20296:up Ccl12,20293:up Ptgs2,19225:down Slpi,20568:up Ednrb,13618:up Ankrd1,107765:down Cxcl9,17329:up Tnfrsf11b,18383:up Ptgir,19222:up                                                                                                                                                                                                                                                                                                                                         |
| forebrain development                                       | GO:0030900 | 5.90E-04 | 4.60E-03 | Fgfr1,14182:down Egfr,13649:down Ncam1,17967:down Wnt5a,22418:down Inhba,16323:down Bmpr1a,12166:down Aldh1a2,19378:up Sema7a,20361:down Col3a1,12825:down Bmp4,12159:up Uchl5,56207:up Cxcl12,20315:up Aldh1a3,56847:down Cx3cr1,13051:down Fgfr2,14183:up                                                                                                                                                                                                                                                                    |
| negative regulation of epithelial to mesenchymal transition | GO:0010719 | 5.91E-04 | 4.60E-03 | Sfrp2,20319:up Sfrp1,20377:up Tgfb2,21808:down Tgfb3,21814:up                                                                                                                                                                                                                                                                                                                                                                                                                                                                  |
| positive regulation of cardiac muscle cell proliferation    | GO:0060045 | 5.91E-04 | 4.60E-03 | Fgfr1,14182:down Ncam1,17967:down Bmpr1a,12166:down Fgfr2,14183:up                                                                                                                                                                                                                                                                                                                                                                                                                                                             |
| branch elongation of an epithelium                          | GO:0060602 | 5.91E-04 | 4.60E-03 | Tnc,21923:down Wnt5a,22418:down Fgfr2,14183:up Bmp4,12159:up                                                                                                                                                                                                                                                                                                                                                                                                                                                                   |
| regulation of reproductive process                          | GO:2000241 | 5.92E-04 | 4.60E-03 | Sfrp1,20377:up Sulf1,240725:down Wnt5a,22418:down Inhba,16323:down Ednrb,13618:up Plat,18791:down Igf1,16000:up Bmp4,12159:up Fgfr2,14183:up                                                                                                                                                                                                                                                                                                                                                                                   |
| humoral immune response                                     | GO:0006959 | 5.93E-04 | 4.61E-03 | Tnf,21926:up Adm,11535:up C3,12266:up C1rb,667277:up Slpi,20568:up Serping1,12258:up C1s1,50908:up C1s2,317677:up                                                                                                                                                                                                                                                                                                                                                                                                              |
| negative regulation of viral process                        | GO:0048525 | 6.02E-04 | 4.67E-03 | Ceacam1,26365:up Tnf,21926:up Ptx3,19288:up Oasl1,231655:up Slpi,20568:up Oas3,246727:up Ccl4,20303:up                                                                                                                                                                                                                                                                                                                                                                                                                         |
| negative regulation of hydrolase activity                   | GO:0051346 | 6.10E-04 | 4.73E-03 | Tnf,21926:up Kng1,16644:up Gas6,14456:up Ptx3,19288:up Slpi,20568:up Cst7,13011:up Tfpi2,21789:down Igf1,16000:up Sfrp2,20319:up Serping1,12258:up Serpina3g,20715:up Vegfa,22339:down Tgfb2,21808:down Serpine2,20720:up Cd109,235505:down                                                                                                                                                                                                                                                                                    |

|                                                                              |            |          |          |                                                                                                                                                                                                                                                                                                                                                                                                                                                                                                                                                                                                                                                                                                                                                                                                                                                                                                                                                                                                                                                                                                                                                                                                                                                                                                                                                                                                                                                                                                                                                                                                                                                                                                                                                                                                |
|------------------------------------------------------------------------------|------------|----------|----------|------------------------------------------------------------------------------------------------------------------------------------------------------------------------------------------------------------------------------------------------------------------------------------------------------------------------------------------------------------------------------------------------------------------------------------------------------------------------------------------------------------------------------------------------------------------------------------------------------------------------------------------------------------------------------------------------------------------------------------------------------------------------------------------------------------------------------------------------------------------------------------------------------------------------------------------------------------------------------------------------------------------------------------------------------------------------------------------------------------------------------------------------------------------------------------------------------------------------------------------------------------------------------------------------------------------------------------------------------------------------------------------------------------------------------------------------------------------------------------------------------------------------------------------------------------------------------------------------------------------------------------------------------------------------------------------------------------------------------------------------------------------------------------------------|
| regulation of cellular metabolic process                                     | GO:0031323 | 6.35E-04 | 4.89E-03 | Fstl3,83554:down Igfbp4,16010:up Adm,11535:up Flrt2,399558:down Tfec,21426:up Sfrp4,20379:up C3,12266:up Ankrd1,107765:down Lyl1,17095:up Igfbp3,16009:up Cd109,235505:down Loxl2,94352:down Plk2,20620:down Loxl3,16950:down Trf,22041:up Cd24a,12484:down Wnt5a,22418:down Ilrn,16181:up Maob,109731:up Adipoq,11450:up Bmp4,12159:up Igf1,16000:up Tgfb2,21808:down Ptgir,19222:up F3,14066:up Fgfr2,14183:up Htr2b,15559:down Kng1,16644:up Prl2c2,18811:up Dram1,71712:up Efemp1,216616:up Ccl6,20305:up Sipi,20568:up Aspn,66695:down Vdr,22337:down Fabp4,11770:up Fam132b,227358:down Htr2a,15558:down Oas3,246727:up Slc40a1,53945:up Gas6,14456:up Egfr,13649:down Sfrp1,20377:up C1qtnf3,81799:down Tgfb3,21814:up Tfrc,22042:up Ceacam1,26365:up Ccl8,20307:up Sfrp2,20319:up Serpina3g,20715:up Fam20a,208659:down Npnt,114249:up Tnfrsf11b,18383:up Prkar2b,19088:up S100a1,20193:up Iccl1,218333:down Ccl2,20296:up Ccl7,20306:up Pdgfc,54635:down Cst7,13011:up Ednr,13618:up Sema7a,20361:down Epas1,13819:up Htra3,78558:down Uchl5,56207:up Ddah1,69219:down Sdp,20324:down Ptx3,19288:up Akr1c18,105349:up Bmpr1a,12166:down Ccl12,20293:up Ccl4,20303:up Ret,19713:up Prg4,96875:down Plpp3,67916:up Creb3l1,26427:down Kitl,17311:up Hp,15439:up Ccl9,20308:up Inhba,16323:down Rasl1a,68895:up Bnc2,242509:down Plat,18791:down Ccl3,20302:up Tfpi2,21789:down Ctla2a,13024:down Srxp2,68792:down Crlf1,12931:down Plod2,26432:down Vegfa,22339:down Serpine2,20720:up Lrrc15,74488:down Nxn,18230:down Igf2,16002:up Pparg,19016:up Tnf,21926:up Glp1r,14652:down Lmcd1,30937:up Fgfr1,14182:down Hmox1,15368:up Sulf1,240725:down Cd4,12504:up Ptgs2,19225:down Grem1,23892:up Phf11d,219132:up Tbx15,21384:down Serping1,12258:up Errfi1,74155:down Enpp1,18605:down |
| positive regulation of hair follicle development                             | GO:0051798 | 6.38E-04 | 4.89E-03 | Tnf,21926:up Tgfb2,21808:down Hps,15442:up                                                                                                                                                                                                                                                                                                                                                                                                                                                                                                                                                                                                                                                                                                                                                                                                                                                                                                                                                                                                                                                                                                                                                                                                                                                                                                                                                                                                                                                                                                                                                                                                                                                                                                                                                     |
| prostatic bud formation                                                      | GO:0060513 | 6.38E-04 | 4.89E-03 | Sulf1,240725:down Wnt5a,22418:down Bmp4,12159:up                                                                                                                                                                                                                                                                                                                                                                                                                                                                                                                                                                                                                                                                                                                                                                                                                                                                                                                                                                                                                                                                                                                                                                                                                                                                                                                                                                                                                                                                                                                                                                                                                                                                                                                                               |
| terpenoid biosynthetic process                                               | GO:0016114 | 6.38E-04 | 4.89E-03 | Akr1c18,105349:up Aldh1a2,19378:up Aldh1a3,56847:down                                                                                                                                                                                                                                                                                                                                                                                                                                                                                                                                                                                                                                                                                                                                                                                                                                                                                                                                                                                                                                                                                                                                                                                                                                                                                                                                                                                                                                                                                                                                                                                                                                                                                                                                          |
| lung-associated mesenchyme development                                       | GO:0060484 | 6.38E-04 | 4.89E-03 | Fgfr1,14182:down Ptk7,71461:down Fgfr2,14183:up                                                                                                                                                                                                                                                                                                                                                                                                                                                                                                                                                                                                                                                                                                                                                                                                                                                                                                                                                                                                                                                                                                                                                                                                                                                                                                                                                                                                                                                                                                                                                                                                                                                                                                                                                |
| positive regulation of insulin-like growth factor receptor signaling pathway | GO:0043568 | 6.38E-04 | 4.89E-03 | Igfbp4,16010:up Igfbp3,16009:up Igf1,16000:up                                                                                                                                                                                                                                                                                                                                                                                                                                                                                                                                                                                                                                                                                                                                                                                                                                                                                                                                                                                                                                                                                                                                                                                                                                                                                                                                                                                                                                                                                                                                                                                                                                                                                                                                                  |
| bone mineralization involved in bone maturation                              | GO:0035630 | 6.38E-04 | 4.89E-03 | Fam101b,76566:down Grem1,23892:up Igf1,16000:up                                                                                                                                                                                                                                                                                                                                                                                                                                                                                                                                                                                                                                                                                                                                                                                                                                                                                                                                                                                                                                                                                                                                                                                                                                                                                                                                                                                                                                                                                                                                                                                                                                                                                                                                                |
| negative regulation of protein autophosphorylation                           | GO:0031953 | 6.38E-04 | 4.89E-03 | Errfi1,74155:down Enpp1,18605:down Adipoq,11450:up                                                                                                                                                                                                                                                                                                                                                                                                                                                                                                                                                                                                                                                                                                                                                                                                                                                                                                                                                                                                                                                                                                                                                                                                                                                                                                                                                                                                                                                                                                                                                                                                                                                                                                                                             |
| protein modification process                                                 | GO:0036211 | 6.47E-04 | 4.94E-03 | Igfbp4,16010:up Flrt2,399558:down Sfrp4,20379:up C3,12266:up Igfbp3,16009:up Cd109,235505:down Loxl2,94352:down Plk2,20620:down Trf,22041:up Cd24a,12484:down Wnt5a,22418:down Mark1,226778:up Ilrn,16181:up Adipoq,11450:up Bmp4,12159:up Igf1,16000:up Tgfb2,21808:down Fgfr2,14183:up Htr2b,15559:down Efemp1,216616:up Ccl6,20305:up Aspn,66695:down Saa3,20210:up Fabp4,11770:up Htr2a,15558:down Gas6,14456:up Egfr,13649:down Sfrp1,20377:up C1qtnf3,81799:down Tgfb3,21814:up Ceacam1,26365:up Ccl8,20307:up Sfrp2,20319:up Fam20a,208659:down Npnt,114249:up Tnfrsf11b,18383:up Prkar2b,19088:up Neur13,214854:down Ccl2,20296:up Ccl7,20306:up Ednr,13618:up Pdgfc,54635:down Pdzn3,55983:down Sema7a,20361:down Uchl5,56207:up Ddah1,69219:down Dok2,13449:up Man2a2,140481:up Mamdc2,71738:down Ccl12,20293:up Bmpr1a,12166:down Ccl4,20303:up Ret,19713:up Vegfb,22340:up Sdf2l1,64136:up Plpp3,67916:up Kitl,17311:up P4ha1,18451:down Ccl9,20308:up Inhba,16323:down Ccl3,20302:up Crlf1,12931:down Vegfa,22339:down Lrrc15,74488:down Igf2,16002:up Nxn,18230:down Tnf,21926:up Fgfr1,14182:down Cd4,12504:up Grem1,23892:up Col3a1,12825:down Errfi1,74155:down Enpp1,18605:down                                                                                                                                                                                                                                                                                                                                                                                                                                                                                                                                                                                              |
| cellular protein modification process                                        | GO:006464  | 6.47E-04 | 4.94E-03 | Igfbp4,16010:up Flrt2,399558:down Sfrp4,20379:up C3,12266:up Igfbp3,16009:up Cd109,235505:down Loxl2,94352:down Plk2,20620:down Trf,22041:up Cd24a,12484:down Wnt5a,22418:down Mark1,226778:up Ilrn,16181:up Adipoq,11450:up Bmp4,12159:up Igf1,16000:up Tgfb2,21808:down Fgfr2,14183:up Htr2b,15559:down Efemp1,216616:up Ccl6,20305:up Aspn,66695:down Saa3,20210:up Fabp4,11770:up Htr2a,15558:down Gas6,14456:up Egfr,13649:down Sfrp1,20377:up C1qtnf3,81799:down Tgfb3,21814:up Ceacam1,26365:up Ccl8,20307:up Sfrp2,20319:up Fam20a,208659:down Npnt,114249:up Tnfrsf11b,18383:up Prkar2b,19088:up Neur13,214854:down Ccl2,20296:up Ccl7,20306:up Ednr,13618:up Pdgfc,54635:down Pdzn3,55983:down Sema7a,20361:down Uchl5,56207:up Ddah1,69219:down Dok2,13449:up Man2a2,140481:up Mamdc2,71738:down Ccl12,20293:up Bmpr1a,12166:down Ccl4,20303:up Ret,19713:up Vegfb,22340:up Sdf2l1,64136:up Plpp3,67916:up Kitl,17311:up P4ha1,18451:down Ccl9,20308:up Inhba,16323:down Ccl3,20302:up Crlf1,12931:down Vegfa,22339:down Lrrc15,74488:down Igf2,16002:up Nxn,18230:down Tnf,21926:up Fgfr1,14182:down Cd4,12504:up Grem1,23892:up Col3a1,12825:down Errfi1,74155:down Enpp1,18605:down                                                                                                                                                                                                                                                                                                                                                                                                                                                                                                                                                                                              |
| vascular endothelial growth factor receptor signaling pathway                | GO:0048010 | 6.48E-04 | 4.94E-03 | Sulf1,240725:down Vegfa,22339:down Ccl2,20296:up Figf,14205:up Bmp4,12159:up                                                                                                                                                                                                                                                                                                                                                                                                                                                                                                                                                                                                                                                                                                                                                                                                                                                                                                                                                                                                                                                                                                                                                                                                                                                                                                                                                                                                                                                                                                                                                                                                                                                                                                                   |
| negative regulation of smooth muscle cell proliferation                      | GO:0048662 | 6.48E-04 | 4.94E-03 | Pparg,19016:up Hmox1,15368:up Ptgir,19222:up Igfbp3,16009:up Adipoq,11450:up                                                                                                                                                                                                                                                                                                                                                                                                                                                                                                                                                                                                                                                                                                                                                                                                                                                                                                                                                                                                                                                                                                                                                                                                                                                                                                                                                                                                                                                                                                                                                                                                                                                                                                                   |
| positive regulation of neurogenesis                                          | GO:0050769 | 6.50E-04 | 4.95E-03 | Prl2c2,18811:up Ptk7,71461:down Dpysl3,22240:down Sema7a,20361:down Ankrd1,107765:down Tnfrsf12a,27279:down Cxcl12,20315:up Vegfa,22339:down Cx3cr1,13051:down Serpine2,20720:up Pparg,19016:up Trf,22041:up Cd24a,12484:down Fgfr1,14182:down Wnt5a,22418:down Bmp4,12159:up Crabp2,12904:down Ret,19713:up                                                                                                                                                                                                                                                                                                                                                                                                                                                                                                                                                                                                                                                                                                                                                                                                                                                                                                                                                                                                                                                                                                                                                                                                                                                                                                                                                                                                                                                                                   |
| hexose metabolic process                                                     | GO:0019318 | 6.60E-04 | 5.02E-03 | Tnf,21926:up Igfbp4,16010:up Fabp5,16592:up C1qtnf3,81799:down Igf1,16000:up Adipoq,11450:up Sor,20322:up Igfbp3,16009:up Enpp1,18605:down Igf2,16002:up Man2a2,140481:up                                                                                                                                                                                                                                                                                                                                                                                                                                                                                                                                                                                                                                                                                                                                                                                                                                                                                                                                                                                                                                                                                                                                                                                                                                                                                                                                                                                                                                                                                                                                                                                                                      |
| cytosolic calcium ion homeostasis                                            | GO:0051480 | 6.65E-04 | 5.04E-03 | Htr2b,15559:down Kng1,16644:up Glp1r,14652:down Fxyd1,56188:up Adm,11535:up Cd24a,12484:down Cd4,12504:up Ednr,13618:up Ccl3,20302:up Bmp4,12159:up Tgfb2,21808:down Htr2a,15558:down Ptgir,19222:up                                                                                                                                                                                                                                                                                                                                                                                                                                                                                                                                                                                                                                                                                                                                                                                                                                                                                                                                                                                                                                                                                                                                                                                                                                                                                                                                                                                                                                                                                                                                                                                           |



|                                                                      |            |          |          |                                                                                                                                                                                                                                                                                                                                                                                                                                                                                                                                                                                                                                                                                                                                                                                                                                                                                                                                                         |
|----------------------------------------------------------------------|------------|----------|----------|---------------------------------------------------------------------------------------------------------------------------------------------------------------------------------------------------------------------------------------------------------------------------------------------------------------------------------------------------------------------------------------------------------------------------------------------------------------------------------------------------------------------------------------------------------------------------------------------------------------------------------------------------------------------------------------------------------------------------------------------------------------------------------------------------------------------------------------------------------------------------------------------------------------------------------------------------------|
| regulation of blood pressure                                         | GO:0008217 | 6.66E-04 | 5.04E-03 | Pparg,19016:up Gas6,14456:up Glp1r,14652:down Col1a2,12843:down Hmox1,15368:up Ptgs2,19225:down Ednrb,13618:up Adipoq,11450:up Ddah1,69219:down Postn,50706:down                                                                                                                                                                                                                                                                                                                                                                                                                                                                                                                                                                                                                                                                                                                                                                                        |
| pathway-restricted SMAD protein phosphorylation                      | GO:0060389 | 6.67E-04 | 5.04E-03 | Tgfb2,21808:down Inhba,16323:down Bmpr1a,12166:down Tgfb3,21814:up Grem1,23892:up Bmp4,12159:up                                                                                                                                                                                                                                                                                                                                                                                                                                                                                                                                                                                                                                                                                                                                                                                                                                                         |
| mesoderm formation                                                   | GO:0001707 | 6.67E-04 | 5.04E-03 | Sfrp2,20319:up Fgfr1,14182:down Wnt5a,22418:down Inhba,16323:down Bmpr1a,12166:down Bmp4,12159:up                                                                                                                                                                                                                                                                                                                                                                                                                                                                                                                                                                                                                                                                                                                                                                                                                                                       |
| positive regulation of intracellular protein transport               | GO:0090316 | 6.77E-04 | 5.10E-03 | Tnf,21926:up Gas6,14456:up Ic1,218333:down Egfr,13649:down Bmpr1a,12166:down Ccl2,20296:up Ptgs2,19225:down Grem1,23892:up Igf1,16000:up Bmp4,12159:up Ceacam1,26365:up Sfrp2,20319:up                                                                                                                                                                                                                                                                                                                                                                                                                                                                                                                                                                                                                                                                                                                                                                  |
| negative regulation of phosphorus metabolic process                  | GO:0010563 | 6.92E-04 | 5.20E-03 | Flrt2,399558:down Sfrp4,20379:up Aspn,66695:down Fabp4,11770:up Igf3,16009:up Cd109,235505:down Lrrc15,74488:down Tnf,21926:up Sfrp1,20377:up Grem1,23892:up Adipoq,11450:up Bmp4,12159:up Igf1,16000:up Ceacam1,26365:up Sfrp2,20319:up Tgfb2,21808:down Prkar2b,19088:up Plpp3,67916:up Errfi1,74155:down Enpp1,18605:down                                                                                                                                                                                                                                                                                                                                                                                                                                                                                                                                                                                                                            |
| negative regulation of phosphate metabolic process                   | GO:0045936 | 6.92E-04 | 5.20E-03 | Flrt2,399558:down Sfrp4,20379:up Aspn,66695:down Fabp4,11770:up Igf3,16009:up Cd109,235505:down Lrrc15,74488:down Tnf,21926:up Sfrp1,20377:up Grem1,23892:up Adipoq,11450:up Bmp4,12159:up Igf1,16000:up Ceacam1,26365:up Sfrp2,20319:up Tgfb2,21808:down Prkar2b,19088:up Plpp3,67916:up Errfi1,74155:down Enpp1,18605:down                                                                                                                                                                                                                                                                                                                                                                                                                                                                                                                                                                                                                            |
| calcium ion transport                                                | GO:0006816 | 6.95E-04 | 5.22E-03 | Htr2b,15559:down Gas6,14456:up Glp1r,14652:down Ccl12,20293:up Cd4,12504:up Ptgs2,19225:down Stc1,20855:up Ccl4,20303:up Igf1,16000:up Bmp4,12159:up Vdr,22337:down Cxcl12,20315:up Tgfb2,21808:down Htr2a,15558:down Sl100a1,20193:up                                                                                                                                                                                                                                                                                                                                                                                                                                                                                                                                                                                                                                                                                                                  |
| epithelial tube formation                                            | GO:0072175 | 6.98E-04 | 5.23E-03 | Cthrc1,68588:down Adm,11535:up Sfrp1,20377:up Ptk7,71461:down Wnt5a,22418:down Grem1,23892:up Bmp4,12159:up Sfrp2,20319:up Ret,19713:up                                                                                                                                                                                                                                                                                                                                                                                                                                                                                                                                                                                                                                                                                                                                                                                                                 |
| embryonic epithelial tube formation                                  | GO:0010183 | 6.98E-04 | 5.23E-03 | Cthrc1,68588:down Adm,11535:up Sfrp1,20377:up Ptk7,71461:down Wnt5a,22418:down Grem1,23892:up Bmp4,12159:up Sfrp2,20319:up Ret,19713:up                                                                                                                                                                                                                                                                                                                                                                                                                                                                                                                                                                                                                                                                                                                                                                                                                 |
| positive regulation of DNA replication                               | GO:0045740 | 6.99E-04 | 5.23E-03 | Fgfr1,14182:down Egfr,13649:down Pdgfr,54635:down Grem1,23892:up Kitl,17311:up Igf1,16000:up Bmp4,12159:up                                                                                                                                                                                                                                                                                                                                                                                                                                                                                                                                                                                                                                                                                                                                                                                                                                              |
| type B pancreatic cell proliferation                                 | GO:0044342 | 7.05E-04 | 5.25E-03 | Igf3,16010:up Sfrp1,20377:up Igf3,16009:up Errfi1,74155:down                                                                                                                                                                                                                                                                                                                                                                                                                                                                                                                                                                                                                                                                                                                                                                                                                                                                                            |
| regulation of osteoblast proliferation                               | GO:0033688 | 7.05E-04 | 5.25E-03 | Cthrc1,68588:down Sfrp1,20377:up Hpse,15442:up Grem1,23892:up                                                                                                                                                                                                                                                                                                                                                                                                                                                                                                                                                                                                                                                                                                                                                                                                                                                                                           |
| positive regulation of vascular endothelial growth factor production | GO:0010575 | 7.05E-04 | 5.25E-03 | Sulf1,240725:down Hpse,15442:up C3,12266:up Ptgs2,19225:down                                                                                                                                                                                                                                                                                                                                                                                                                                                                                                                                                                                                                                                                                                                                                                                                                                                                                            |
| regulation of leukocyte cell-cell adhesion                           | GO:1903037 | 7.16E-04 | 5.33E-03 | Tnf,21926:up Cd24a,12484:down Has2,15117:down Ccl2,20296:up Cd4,12504:up Tfrc,22042:up Igf1,16000:up Bmp4,12159:up Ctla2a,13024:down Ceacam1,26365:up Cxcl12,20315:up Igf2,16002:up Tnfsf9,21950:up                                                                                                                                                                                                                                                                                                                                                                                                                                                                                                                                                                                                                                                                                                                                                     |
| ear development                                                      | GO:0043583 | 7.20E-04 | 5.35E-03 | Cthrc1,68588:down Cxcl14,57266:down Fgfr1,14182:down Col11a1,12814:down Ptk7,71461:down Wnt5a,22418:down Igf1,16000:up Bmp4,12159:up Mcoln3,171166:up Aldh1a3,56847:down Fgfr2,14183:up                                                                                                                                                                                                                                                                                                                                                                                                                                                                                                                                                                                                                                                                                                                                                                 |
| salivary gland development                                           | GO:0007431 | 7.30E-04 | 5.41E-03 | Tnf,21926:up Fgfr1,14182:down Egfr,13649:down Plxnd1,67784:up Fgfr2,14183:up                                                                                                                                                                                                                                                                                                                                                                                                                                                                                                                                                                                                                                                                                                                                                                                                                                                                            |
| complement activation                                                | GO:0006956 | 7.30E-04 | 5.41E-03 | C1s1,50908:up Serping1,12258:up C1s2,317677:up C3,12266:up C1rb,667277:up                                                                                                                                                                                                                                                                                                                                                                                                                                                                                                                                                                                                                                                                                                                                                                                                                                                                               |
| positive regulation of cytosolic calcium ion concentration           | GO:0007204 | 7.33E-04 | 5.42E-03 | Htr2b,15559:down Kng1,16644:up Glp1r,14652:down Adm,11535:up Cd24a,12484:down Cd4,12504:up Ednrb,13618:up Ccl3,20302:up Bmp4,12159:up Tgfb2,21808:down Htr2a,15558:down Ptgir,19222:up                                                                                                                                                                                                                                                                                                                                                                                                                                                                                                                                                                                                                                                                                                                                                                  |
| homeostasis of number of cells                                       | GO:0048872 | 7.43E-04 | 5.48E-03 | Cd24a,12484:down Hmox1,15368:up Inhba,16323:down Tgfb3,21814:up Ccl2,20296:up Ampd3,11717:up Epas1,13819:up Bmp4,12159:up Ceacam1,26365:up Vegfa,22339:down Tgfb2,21808:down Slc40a1,53945:up Kitl,17311:up                                                                                                                                                                                                                                                                                                                                                                                                                                                                                                                                                                                                                                                                                                                                             |
| regulation of hormone levels                                         | GO:0010817 | 7.45E-04 | 5.50E-03 | Adm,11535:up Inhba,16323:down Aldh1a2,19378:up Htr2a,15558:down Igf2,16002:up Pparg,19016:up Tnf,21926:up Akr1c18,105349:up Glp1r,14652:down Egfr,13649:down Fgfr1,14182:down Sfrp1,20377:up C1qtnf3,81799:down Irrn,16181:up Adipoq,11450:up Igf1,16000:up Crabp2,12904:down Aldh1a3,56847:down                                                                                                                                                                                                                                                                                                                                                                                                                                                                                                                                                                                                                                                        |
| regulation of leukocyte proliferation                                | GO:0070663 | 7.52E-04 | 5.54E-03 | Cd24a,12484:down Ccl12,20293:up Cd4,12504:up Tfrc,22042:up Grem1,23892:up Igf1,16000:up Bmp4,12159:up Ceacam1,26365:up Igf2,16002:up Kitl,17311:up Tnfsf9,21950:up                                                                                                                                                                                                                                                                                                                                                                                                                                                                                                                                                                                                                                                                                                                                                                                      |
| response to abiotic stimulus                                         | GO:0009628 | 7.66E-04 | 5.63E-03 | Htr2b,15559:down Tfec,21426:up Ccl2,20296:up Plat,18791:down Epas1,13819:up Ankrd1,107765:down Nabp1,109019:down Vegfa,22339:down Htr2a,15558:down Hspb7,29818:up Mmp2,17390:down Serpine2,20720:up Pparg,19016:up Tnf,21926:up Loxl2,94352:down Hvcn1,74096:up Egfr,13649:down Cd24a,12484:down Col11a1,12814:down Hmox1,15368:up Mme,17380:up Sfrp1,20377:up Igf1,16000:up Col3a1,12825:down Sfrp2,20319:up Tgfb2,21808:down                                                                                                                                                                                                                                                                                                                                                                                                                                                                                                                          |
| positive regulation of leukocyte cell-cell adhesion                  | GO:1903039 | 7.69E-04 | 5.65E-03 | Tnf,21926:up Cd24a,12484:down Has2,15117:down Ccl2,20296:up Cd4,12504:up Tfrc,22042:up Igf1,16000:up Ceacam1,26365:up Igf2,16002:up Tnfsf9,21950:up                                                                                                                                                                                                                                                                                                                                                                                                                                                                                                                                                                                                                                                                                                                                                                                                     |
| renal system development                                             | GO:0072001 | 7.70E-04 | 5.65E-03 | Fgfr1,14182:down Sfrp1,20377:up Sulf1,240725:down Wnt5a,22418:down Aldh1a2,19378:up Grem1,23892:up Bmp4,12159:up Adipoq,11450:up Crlf1,12931:down Ret,19713:up Vegfa,22339:down Npnt,114249:up Fgfr2,14183:up                                                                                                                                                                                                                                                                                                                                                                                                                                                                                                                                                                                                                                                                                                                                           |
| regulation of cellular component organization                        | GO:0051128 | 7.87E-04 | 5.77E-03 | Igf3,16010:up Ic1,218333:down Flrt2,399558:down Plxnd1,67784:up Sfrp4,20379:up Ccl2,20296:up C3,12266:up Sema7a,20361:down Ankrd1,107765:down Htra3,78558:down Tnfrsf12a,27279:down Gpm6b,14758:up Postn,50706:down Igf3,16009:up PIK2,20620:down Trf,22041:up Ptx3,19288:up Cd24a,12484:down Ncam1,17967:down Wnt5a,22418:down Ccl12,20293:up Wisp1,22402:down Adipoq,11450:up Bmp4,12159:up Igf1,16000:up Crabp2,12904:down Cxcl9,17329:up Ret,19713:up Tgfb2,21808:down Fgfr2,14183:up Thbs2,21826:down Prllc2,18811:up Efemp1,216616:up Ptk7,71461:down Inhba,16323:down Dpysl3,22240:down Ccl3,20302:up Srxp2,68792:down Plod2,26432:down Cxcl12,20315:up Vegfa,22339:down Serpine2,20720:up Lrrc15,74488:down Igf2,16002:up Pparg,19016:up Gas6,14456:up Tnf,21926:up Lmc1,30937:up Fgfr1,14182:down Egfr,13649:down Has2,15117:down Sfrp1,20377:up Tgfb3,21814:up Grem1,23892:up Ccl8,20307:up Sfrp2,20319:up Col5a1,12831:down Enpp1,18605:down |

|                                                                  |            |          |          |                                                                                                                                                                                                                                                                                                                                                                                                                                                                                                                                                                                                                  |
|------------------------------------------------------------------|------------|----------|----------|------------------------------------------------------------------------------------------------------------------------------------------------------------------------------------------------------------------------------------------------------------------------------------------------------------------------------------------------------------------------------------------------------------------------------------------------------------------------------------------------------------------------------------------------------------------------------------------------------------------|
| neuron differentiation                                           | GO:0030182 | 7.88E-04 | 5.77E-03 | Adm,11535:up Flrt2,399558:down Plxnd1,67784:up Aldh1a2,19378:up Figf,14205:up Ednrb,13618:up Sema7a,20361:down Ankrd1,107765:down Tnfrsf12a,27279:down Postn,50706:down Plk2,20620:down Cd24a,12484:down Ncam1,17967:down Wnt5a,22418:down Bmp4,12159:up Crabp2,12904:down Tnc,21923:down Ret,19713:up Tgfb2,21808:down Fgfr2,14183:up Cthrc1,68588:down Lama2,16773:down Efemp1,216616:up Ptk7,71461:down Inhba,16323:down Dpysl3,22240:down Cxcl12,20315:up Vegfa,22339:down Serpine2,20720:up Mmp2,17390:down Egfr,13649:down Fgfr1,14182:down Sfrp1,20377:up Sfrp2,20319:up Mcoln3,171166:up Rspo2,239405:up |
| bone resorption                                                  | GO:0045453 | 7.97E-04 | 5.80E-03 | Ceacam1,26365:up Trf,22041:up Egfr,13649:down Vegfa,22339:down Tfrc,22042:up Tnfrsf11b,18383:up                                                                                                                                                                                                                                                                                                                                                                                                                                                                                                                  |
| neuroblast proliferation                                         | GO:0007405 | 7.97E-04 | 5.80E-03 | Prl2c2,18811:up Fgfr1,14182:down Cd24a,12484:down Vegfa,22339:down Cx3cr1,13051:down Fgfr2,14183:up                                                                                                                                                                                                                                                                                                                                                                                                                                                                                                              |
| nitric oxide metabolic process                                   | GO:0046209 | 7.97E-04 | 5.80E-03 | Tnf,21926:up Ptx3,19288:up Ddah1,69219:down Egfr,13649:down Ptgs2,19225:down Igf1,16000:up                                                                                                                                                                                                                                                                                                                                                                                                                                                                                                                       |
| response to glucocorticoid                                       | GO:0051384 | 7.97E-04 | 5.80E-03 | Tnf,21926:up Alpl,11647:up Il1rn,16181:up Pappa,18491:down Cdo1,12583:up Bmp4,12159:up                                                                                                                                                                                                                                                                                                                                                                                                                                                                                                                           |
| lung morphogenesis                                               | GO:0060425 | 7.97E-04 | 5.80E-03 | Tnf,21926:up Tnc,21923:down Rspo2,239405:up Fgfr2,14183:up Igf1,16000:up Bmp4,12159:up                                                                                                                                                                                                                                                                                                                                                                                                                                                                                                                           |
| vasoconstriction                                                 | GO:0042310 | 8.08E-04 | 5.87E-03 | Htr2b,15559:down Adm,11535:up Egfr,13649:down Htr2a,15558:down Ptgs2,19225:down Mmp2,17390:down Ednrb,13618:up                                                                                                                                                                                                                                                                                                                                                                                                                                                                                                   |
| memory                                                           | GO:0007613 | 8.09E-04 | 5.87E-03 | Plk2,20620:down Glp1r,14652:down Ptgs2,19225:down Il1rn,16181:up Igf1,16000:up Htr2a,15558:down Cx3cr1,13051:down Igf2,16002:up                                                                                                                                                                                                                                                                                                                                                                                                                                                                                  |
| glial cell migration                                             | GO:0008347 | 8.19E-04 | 5.92E-03 | Efemp1,216616:up Tgfb2,21808:down Ccl2,20296:up Ccl12,20293:up Ccl3,20302:up                                                                                                                                                                                                                                                                                                                                                                                                                                                                                                                                     |
| positive regulation of kidney development                        | GO:0090184 | 8.19E-04 | 5.92E-03 | Ret,19713:up Vegfa,22339:down Grem1,23892:up Bmp4,12159:up Adipoq,11450:up                                                                                                                                                                                                                                                                                                                                                                                                                                                                                                                                       |
| regulation of lipid biosynthetic process                         | GO:0046890 | 8.19E-04 | 5.92E-03 | Htr2b,15559:down Tnf,21926:up Akr1c18,105349:up C3,12266:up Igf1,16000:up Vdr,22337:down Ceacam1,26365:up Htr2a,15558:down Igf2,16002:up                                                                                                                                                                                                                                                                                                                                                                                                                                                                         |
| regulation of hair cycle                                         | GO:0042634 | 8.35E-04 | 6.02E-03 | Tnf,21926:up Tgfb2,21808:down Inhba,16323:down Hpse,15442:up                                                                                                                                                                                                                                                                                                                                                                                                                                                                                                                                                     |
| positive regulation of blood vessel endothelial cell migration   | GO:0043536 | 8.35E-04 | 6.02E-03 | Prl2c2,18811:up Srxp2,68792:down Vegfa,22339:down Ptgs2,19225:down                                                                                                                                                                                                                                                                                                                                                                                                                                                                                                                                               |
| positive regulation of activated T cell proliferation            | GO:0042104 | 8.35E-04 | 6.02E-03 | Cd24a,12484:down Igf2,16002:up Tnfsf9,21950:up Igf1,16000:up                                                                                                                                                                                                                                                                                                                                                                                                                                                                                                                                                     |
| response to organonitrogen compound                              | GO:0010243 | 8.43E-04 | 6.07E-03 | Htr2b,15559:down Col5a2,12832:down Pdgcf,54635:down Htr2a,15558:down Mmp2,17390:down Igf2,16002:up Cdo1,12583:up Pparg,19016:up Tnf,21926:up Col1a2,12843:down Egfr,13649:down Ncam1,17967:down Hmox1,15368:up Sfrp1,20377:up Adipoq,11450:up Igf1,16000:up Col3a1,12825:down Gatm,67092:down Serpina3g,20715:up Enpp1,18605:down                                                                                                                                                                                                                                                                                |
| negative regulation of protein kinase activity                   | GO:0006469 | 8.55E-04 | 6.14E-03 | Flrt2,399558:down Sfrp1,20377:up Aspn,66695:down Bmp4,12159:up Adipoq,11450:up Ceacam1,26365:up Sfrp2,20319:up Fabp4,11770:up Prkar2b,19088:up Lrrc15,74488:down Errf1,74155:down                                                                                                                                                                                                                                                                                                                                                                                                                                |
| lymphocyte mediated immunity                                     | GO:0002449 | 8.55E-04 | 6.14E-03 | Tnf,21926:up Clec2d,93694:up Cd24a,12484:down C3,12266:up C1rb,667277:up Tfrc,22042:up Ceacam1,26365:up Serping1,12258:up C1s1,50908:up C1s2,317677:up Igf2,16002:up                                                                                                                                                                                                                                                                                                                                                                                                                                             |
| regulation of wound healing                                      | GO:0061041 | 8.59E-04 | 6.16E-03 | Kng1,16644:up Ceacam1,26365:up Tnfrsf12a,27279:down Serping1,12258:up Hpse,15442:up Serpine2,20720:up Ppp3,67916:up Cd109,235505:down                                                                                                                                                                                                                                                                                                                                                                                                                                                                            |
| positive regulation of chemokine secretion                       | GO:0090197 | 8.66E-04 | 6.16E-03 | Lpl,16956:up Postn,50706:down Il1rl1,17082:down                                                                                                                                                                                                                                                                                                                                                                                                                                                                                                                                                                  |
| cellular response to vitamin                                     | GO:0071295 | 8.66E-04 | 6.16E-03 | Vdr,22337:down Gas6,14456:up Postn,50706:down                                                                                                                                                                                                                                                                                                                                                                                                                                                                                                                                                                    |
| skin morphogenesis                                               | GO:0043589 | 8.66E-04 | 6.16E-03 | Col1a2,12843:down Cdsn,386463:up Errf1,74155:down                                                                                                                                                                                                                                                                                                                                                                                                                                                                                                                                                                |
| negative regulation of natural killer cell mediated cytotoxicity | GO:0045953 | 8.66E-04 | 6.16E-03 | Ceacam1,26365:up Clec2d,93694:up Igf2,16002:up                                                                                                                                                                                                                                                                                                                                                                                                                                                                                                                                                                   |
| positive regulation of hair cycle                                | GO:0042635 | 8.66E-04 | 6.16E-03 | Tnf,21926:up Tgfb2,21808:down Hpse,15442:up                                                                                                                                                                                                                                                                                                                                                                                                                                                                                                                                                                      |
| renal system process                                             | GO:0003014 | 8.67E-04 | 6.16E-03 | Gas6,14456:up Sulf1,240725:down Stc1,20855:up Ednrb,13618:up Anpep,16790:up Bmp4,12159:up Adipoq,11450:up                                                                                                                                                                                                                                                                                                                                                                                                                                                                                                        |
| regulation of cell morphogenesis involved in differentiation     | GO:0010769 | 8.67E-04 | 6.16E-03 | Has2,15117:down Plxnd1,67784:up Sfrp1,20377:up Wnt5a,22418:down Tgfb3,21814:up Grem1,23892:up Sema7a,20361:down Tnfrsf12a,27279:down Sfrp2,20319:up Crabp2,12904:down Ret,19713:up Cxcl12,20315:up Postn,50706:down Vegfa,22339:down Tgfb2,21808:down                                                                                                                                                                                                                                                                                                                                                            |
| regulation of calcium-mediated signaling                         | GO:0050848 | 8.69E-04 | 6.16E-03 | Lmcd1,30937:up Cd24a,12484:down Ncam1,17967:down Cd4,12504:up Ccl4,20303:up Igf1,16000:up                                                                                                                                                                                                                                                                                                                                                                                                                                                                                                                        |
| striated muscle cell proliferation                               | GO:0014855 | 8.69E-04 | 6.16E-03 | Fgfr1,14182:down Ncam1,17967:down Tgfb2,21808:down Bmpr1a,12166:down Tgfb3,21814:up Fgfr2,14183:up                                                                                                                                                                                                                                                                                                                                                                                                                                                                                                               |
| negative regulation of homeostatic process                       | GO:0032845 | 8.85E-04 | 6.27E-03 | Htr2b,15559:down Glp1r,14652:down Cd24a,12484:down Ceacam1,26365:up Vegfa,22339:down Tgfb2,21808:down Htr2a,15558:down Tnfrsf11b,18383:up Anpep,16790:up Kitl,17311:up                                                                                                                                                                                                                                                                                                                                                                                                                                           |
| muscle tissue development                                        | GO:0060537 | 9.06E-04 | 6.41E-03 | Aldh1a2,19378:up Ankrd1,107765:down Vegfa,22339:down Col11a1,12814:down Fgfr1,14182:down Ncam1,17967:down Tgfb3,21814:up Bmpr1a,12166:down Wnt5a,22418:down Wisp1,22402:down Grem1,23892:up Bmp4,12159:up Igf1,16000:up Col3a1,12825:down Tgfb2,21808:down Fgfr2,14183:up                                                                                                                                                                                                                                                                                                                                        |
| erythrocyte homeostasis                                          | GO:0034101 | 9.12E-04 | 6.43E-03 | Cd24a,12484:down Hmox1,15368:up Inhba,16323:down Tgfb3,21814:up Ampd3,11717:up Epas1,13819:up Bmp4,12159:up Vegfa,22339:down                                                                                                                                                                                                                                                                                                                                                                                                                                                                                     |
| multicellular organismal homeostasis                             | GO:0048871 | 9.20E-04 | 6.48E-03 | Tnf,21926:up Trf,22041:up Egfr,13649:down Ptgs2,19225:down Tfrc,22042:up Il1rn,16181:up Ednrb,13618:up Ampd3,11717:up Epas1,13819:up Ceacam1,26365:up Vegfa,22339:down Htr2a,15558:down Tnfrsf11b,18383:up Slc40a1,53945:up                                                                                                                                                                                                                                                                                                                                                                                      |
| regulation of myeloid cell differentiation                       | GO:0045637 | 9.27E-04 | 6.52E-03 | Fstl3,83554:down Tnf,21926:up Clec2d,93694:up Lrrc17,74511:down Sfrp1,20377:up Inhba,16323:down Ccl3,20302:up Adipoq,11450:up Ceacam1,26365:up Kitl,17311:up                                                                                                                                                                                                                                                                                                                                                                                                                                                     |

|                                                                                 |            |          |          |                                                                                                                                                                                                   |
|---------------------------------------------------------------------------------|------------|----------|----------|---------------------------------------------------------------------------------------------------------------------------------------------------------------------------------------------------|
| organ formation                                                                 | GO:0048645 | 9.46E-04 | 6.64E-03 | Fgfr1,14182:down Sulf1,240725:down Wnt5a,22418:down Bmpr1a,12166:down Fgfr2,14183:up Bmp4,12159:up                                                                                                |
| mesoderm morphogenesis                                                          | GO:0048332 | 9.46E-04 | 6.64E-03 | Sfrp2,20319:up Fgfr1,14182:down Wnt5a,22418:down Inhba,16323:down Bmpr1a,12166:down Bmp4,12159:up                                                                                                 |
| leukocyte mediated immunity                                                     | GO:0002443 | 9.54E-04 | 6.65E-03 | Tnf,21926:up Clec2d,93694:up Cd24a,12484:down Hmox1,15368:up Ccl2,20296:up C3,12266:up C1rb,667277:up Tfrc,22042:up Ceacam1,26365:up C1s1,50908:up Serping1,12258:up C1s2,317677:up lgf2,16002:up |
| negative regulation of endodermal cell differentiation                          | GO:1903225 | 9.65E-04 | 6.65E-03 | Col5a2,12832:down Col5a1,12831:down                                                                                                                                                               |
| proteoglycan catabolic process                                                  | GO:0030167 | 9.65E-04 | 6.65E-03 | Hpse,15442:up Adamts12,239337:down                                                                                                                                                                |
| pigment catabolic process                                                       | GO:0046149 | 9.65E-04 | 6.65E-03 | Hmox1,15368:up Blvrb,233016:up                                                                                                                                                                    |
| ventricular zone neuroblast division                                            | GO:0021847 | 9.65E-04 | 6.65E-03 | Fgfr1,14182:down Fgfr2,14183:up                                                                                                                                                                   |
| regulation of transcription from RNA polymerase II promoter in response to iron | GO:0034395 | 9.65E-04 | 6.65E-03 | Hmox1,15368:up Slc40a1,53945:up                                                                                                                                                                   |
| regulation of planar cell polarity pathway involved in axis elongation          | GO:2000040 | 9.65E-04 | 6.65E-03 | Sfrp2,20319:up Sfrp1,20377:up                                                                                                                                                                     |
| lateral mesodermal cell differentiation                                         | GO:0048371 | 9.65E-04 | 6.65E-03 | Fgfr1,14182:down Bmpr1a,12166:down                                                                                                                                                                |
| negative regulation of planar cell polarity pathway involved in axis elongation | GO:2000041 | 9.65E-04 | 6.65E-03 | Sfrp2,20319:up Sfrp1,20377:up                                                                                                                                                                     |
| lateral mesoderm morphogenesis                                                  | GO:0048369 | 9.65E-04 | 6.65E-03 | Fgfr1,14182:down Bmpr1a,12166:down                                                                                                                                                                |
| negative regulation of dendritic cell differentiation                           | GO:2001199 | 9.65E-04 | 6.65E-03 | Tmem176a,66058:up Tmem176b,65963:up                                                                                                                                                               |
| negative regulation of bone mineralization involved in bone maturation          | GO:1900158 | 9.65E-04 | 6.65E-03 | Fam101b,76566:down Grem1,23892:up                                                                                                                                                                 |
| heme catabolic process                                                          | GO:0042167 | 9.65E-04 | 6.65E-03 | Hmox1,15368:up Blvrb,233016:up                                                                                                                                                                    |
| phospholipase C-activating serotonin receptor signaling pathway                 | GO:0007208 | 9.65E-04 | 6.65E-03 | Htr2b,15559:down Htr2a,15558:down                                                                                                                                                                 |
| lateral mesoderm formation                                                      | GO:0048370 | 9.65E-04 | 6.65E-03 | Fgfr1,14182:down Bmpr1a,12166:down                                                                                                                                                                |
| telencephalon development                                                       | GO:0021537 | 9.68E-04 | 6.66E-03 | Fgfr1,14182:down Egfr,13649:down Wnt5a,22418:down Inhba,16323:down Sema7a,20361:down Col3a1,12825:down Bmp4,12159:up Uchl5,56207:up Cxcl12,20315:up Aldh1a3,56847:down Cx3cr1,13051:down          |
| regulation of odontogenesis                                                     | GO:0042481 | 9.80E-04 | 6.72E-03 | Rspo2,239405:up Tnfrsf11b,18383:up Aspn,66695:down Bmp4,12159:up                                                                                                                                  |
| regulation of vascular permeability                                             | GO:0043114 | 9.80E-04 | 6.72E-03 | Ceacam1,26365:up Adm,11535:up Vegfa,22339:down Ccl4,20303:up                                                                                                                                      |
| regulation of neural precursor cell proliferation                               | GO:2000177 | 9.95E-04 | 6.81E-03 | Prl2c2,18811:up Trf,22041:up Cd24a,12484:down Wnt5a,22418:down Vegfa,22339:down Cx3cr1,13051:down lgf1,16000:up                                                                                   |
| regulation of fibroblast proliferation                                          | GO:0048145 | 1.06E-03 | 7.27E-03 | Pparg,19016:up Gas6,14456:up Egfr,13649:down Sfrp1,20377:up Wnt5a,22418:down Pdgfc,54635:down lgf1,16000:up                                                                                       |
| positive regulation of T cell proliferation                                     | GO:0042102 | 1.14E-03 | 7.64E-03 | Ceacam1,26365:up Cd24a,12484:down Cd4,12504:up Tfrc,22042:up lgf2,16002:up Tnfsf9,21950:up lgf1,16000:up                                                                                          |
| regulation of chemokine secretion                                               | GO:0090196 | 1.14E-03 | 7.64E-03 | Lpl,16956:up Postn,50706:down  l1r1,17082:down                                                                                                                                                    |
| chemokine secretion                                                             | GO:0090195 | 1.14E-03 | 7.64E-03 | Lpl,16956:up Postn,50706:down  l1r1,17082:down                                                                                                                                                    |
| negative regulation of natural killer cell mediated immunity                    | GO:0002716 | 1.14E-03 | 7.64E-03 | Ceacam1,26365:up Clec2d,93694:up lgf2,16002:up                                                                                                                                                    |
| regulation of apoptotic process involved in morphogenesis                       | GO:1902337 | 1.14E-03 | 7.64E-03 | Vdr,22337:down Tgfb2,21808:down Tgfb3,21814:up                                                                                                                                                    |
| positive regulation of inflammatory response to antigenic stimulus              | GO:0002863 | 1.14E-03 | 7.64E-03 | Tnf,21926:up Cd24a,12484:down C3,12266:up                                                                                                                                                         |
| prostate glandular acinus development                                           | GO:0060525 | 1.14E-03 | 7.64E-03 | Sfrp1,20377:up Fgfr2,14183:up lgf1,16000:up                                                                                                                                                       |
| regulation of macrophage cytokine production                                    | GO:0010935 | 1.14E-03 | 7.64E-03 | Wnt5a,22418:down Tgfb2,21808:down Sema7a,20361:down                                                                                                                                               |

|                                                              |            |          |          |                                                                                                                                                                                                                                                                                                                                                                                                                                                                                                                                                                                                                                                                                                                                                                                                                                                                                                                                                                                                                                                                                                                                                                                                                                                                                                                                                                                                                                                                                                                                                                                                                |
|--------------------------------------------------------------|------------|----------|----------|----------------------------------------------------------------------------------------------------------------------------------------------------------------------------------------------------------------------------------------------------------------------------------------------------------------------------------------------------------------------------------------------------------------------------------------------------------------------------------------------------------------------------------------------------------------------------------------------------------------------------------------------------------------------------------------------------------------------------------------------------------------------------------------------------------------------------------------------------------------------------------------------------------------------------------------------------------------------------------------------------------------------------------------------------------------------------------------------------------------------------------------------------------------------------------------------------------------------------------------------------------------------------------------------------------------------------------------------------------------------------------------------------------------------------------------------------------------------------------------------------------------------------------------------------------------------------------------------------------------|
| positive regulation of sprouting angiogenesis                | GO:1903672 | 1.14E-03 | 7.64E-03 | Srpx2,68792:down Vegfa,22339:down Ptgs2,19225:down                                                                                                                                                                                                                                                                                                                                                                                                                                                                                                                                                                                                                                                                                                                                                                                                                                                                                                                                                                                                                                                                                                                                                                                                                                                                                                                                                                                                                                                                                                                                                             |
| negative regulation of cell adhesion                         | GO:007162  | 1.14E-03 | 7.64E-03 | Cd24a,12484:down Il1rn,16181:up Bmp4,12159:up Adipoq,11450:up Ceacam1,26365:up Tnc,21923:down Cxcl12,20315:up Postn,50706:down Vegfa,22339:down Serpine2,20720:up Mmp2,17390:down                                                                                                                                                                                                                                                                                                                                                                                                                                                                                                                                                                                                                                                                                                                                                                                                                                                                                                                                                                                                                                                                                                                                                                                                                                                                                                                                                                                                                              |
| negative regulation of JNK cascade                           | GO:0046329 | 1.14E-03 | 7.64E-03 | Ceacam1,26365:up Sfrp2,20319:up Sfrp1,20377:up Sfrp4,20379:up                                                                                                                                                                                                                                                                                                                                                                                                                                                                                                                                                                                                                                                                                                                                                                                                                                                                                                                                                                                                                                                                                                                                                                                                                                                                                                                                                                                                                                                                                                                                                  |
| coronary vasculature morphogenesis                           | GO:0060977 | 1.14E-03 | 7.64E-03 | Fgfr1,14182:down Vegfa,22339:down Tgfb3,21814:up Fgfr2,14183:up                                                                                                                                                                                                                                                                                                                                                                                                                                                                                                                                                                                                                                                                                                                                                                                                                                                                                                                                                                                                                                                                                                                                                                                                                                                                                                                                                                                                                                                                                                                                                |
| positive regulation of lymphocyte migration                  | GO:2000403 | 1.14E-03 | 7.64E-03 | Cxcl14,57266:down Cxcl12,20315:up Wnt5a,22418:down Ccl4,20303:up                                                                                                                                                                                                                                                                                                                                                                                                                                                                                                                                                                                                                                                                                                                                                                                                                                                                                                                                                                                                                                                                                                                                                                                                                                                                                                                                                                                                                                                                                                                                               |
| regulation of sprouting angiogenesis                         | GO:1903670 | 1.14E-03 | 7.64E-03 | Ceacam1,26365:up Srpx2,68792:down Vegfa,22339:down Ptgs2,19225:down                                                                                                                                                                                                                                                                                                                                                                                                                                                                                                                                                                                                                                                                                                                                                                                                                                                                                                                                                                                                                                                                                                                                                                                                                                                                                                                                                                                                                                                                                                                                            |
| osteoblast proliferation                                     | GO:0033687 | 1.14E-03 | 7.64E-03 | Cthrc1,68588:down Sfrp1,20377:up Hpse,15442:up Grem1,23892:up                                                                                                                                                                                                                                                                                                                                                                                                                                                                                                                                                                                                                                                                                                                                                                                                                                                                                                                                                                                                                                                                                                                                                                                                                                                                                                                                                                                                                                                                                                                                                  |
| regulation of immune effector process                        | GO:0002697 | 1.14E-03 | 7.64E-03 | Tnf,21926:up Clec2d,93694:up Lmcd1,30937:up Cd24a,12484:down Hmox1,15368:up Wnt5a,22418:down Ccl2,20296:up C3,12266:up Tfrc,22042:up Sema7a,20361:down Ceacam1,26365:up Serping1,12258:up Tgfb2,21808:down Iffit1,15957:up Igf2,16002:up                                                                                                                                                                                                                                                                                                                                                                                                                                                                                                                                                                                                                                                                                                                                                                                                                                                                                                                                                                                                                                                                                                                                                                                                                                                                                                                                                                       |
| calcium-mediated signaling                                   | GO:0019722 | 1.15E-03 | 7.67E-03 | Htr2b,15559:down Tnf,21926:up Lmcd1,30937:up Cd24a,12484:down Ncam1,17967:down Cd4,12504:up Ccl4,20303:up Igf1,16000:up                                                                                                                                                                                                                                                                                                                                                                                                                                                                                                                                                                                                                                                                                                                                                                                                                                                                                                                                                                                                                                                                                                                                                                                                                                                                                                                                                                                                                                                                                        |
| stress-activated protein kinase signaling cascade            | GO:0031098 | 1.19E-03 | 7.92E-03 | Tnf,21926:up Trf,22041:up Sfrp1,20377:up Wnt5a,22418:down Sfrp4,20379:up Il1rn,16181:up Ceacam1,26365:up Sfrp2,20319:up Vegfa,22339:down Tgfb2,21808:down Errfi1,74155:down                                                                                                                                                                                                                                                                                                                                                                                                                                                                                                                                                                                                                                                                                                                                                                                                                                                                                                                                                                                                                                                                                                                                                                                                                                                                                                                                                                                                                                    |
| adaptive immune response                                     | GO:0002250 | 1.19E-03 | 7.94E-03 | Tnf,21926:up Cd24a,12484:down Ly9,17085:up Cd4,12504:up C3,12266:up C1rb,667277:up Tfrc,22042:up Clec4n,56620:up Serping1,12258:up C1s1,50908:up Serpina3g,20715:up Vegfa,22339:down C1s2,317677:up Il1rl1,17082:down                                                                                                                                                                                                                                                                                                                                                                                                                                                                                                                                                                                                                                                                                                                                                                                                                                                                                                                                                                                                                                                                                                                                                                                                                                                                                                                                                                                          |
| cytokine production involved in immune response              | GO:0002367 | 1.21E-03 | 8.05E-03 | Tnf,21926:up Gas6,14456:up Hmox1,15368:up Wnt5a,22418:down Tgfb2,21808:down Sema7a,20361:down                                                                                                                                                                                                                                                                                                                                                                                                                                                                                                                                                                                                                                                                                                                                                                                                                                                                                                                                                                                                                                                                                                                                                                                                                                                                                                                                                                                                                                                                                                                  |
| regulation of epithelial cell apoptotic process              | GO:1904035 | 1.21E-03 | 8.05E-03 | Gas6,14456:up Akr1c18,105349:up Hmox1,15368:up Sfrp4,20379:up Igf1,16000:up Bmp4,12159:up                                                                                                                                                                                                                                                                                                                                                                                                                                                                                                                                                                                                                                                                                                                                                                                                                                                                                                                                                                                                                                                                                                                                                                                                                                                                                                                                                                                                                                                                                                                      |
| negative regulation of immune effector process               | GO:0002698 | 1.22E-03 | 8.06E-03 | Ceacam1,26365:up Tnf,21926:up Clec2d,93694:up Serping1,12258:up Hmox1,15368:up Tgfb2,21808:down Igf2,16002:up                                                                                                                                                                                                                                                                                                                                                                                                                                                                                                                                                                                                                                                                                                                                                                                                                                                                                                                                                                                                                                                                                                                                                                                                                                                                                                                                                                                                                                                                                                  |
| negative regulation of extrinsic apoptotic signaling pathway | GO:2001237 | 1.22E-03 | 8.06E-03 | Tnf,21926:up Sfrp2,20319:up Tnfrsf23,79201:down Hmox1,15368:up Cx3cr1,13051:down Igf1,16000:up Bmp4,12159:up                                                                                                                                                                                                                                                                                                                                                                                                                                                                                                                                                                                                                                                                                                                                                                                                                                                                                                                                                                                                                                                                                                                                                                                                                                                                                                                                                                                                                                                                                                   |
| fibroblast proliferation                                     | GO:0048144 | 1.22E-03 | 8.06E-03 | Pparg,19016:up Gas6,14456:up Egfr,13649:down Sfrp1,20377:up Wnt5a,22418:down Pdgfc,54635:down Igf1,16000:up                                                                                                                                                                                                                                                                                                                                                                                                                                                                                                                                                                                                                                                                                                                                                                                                                                                                                                                                                                                                                                                                                                                                                                                                                                                                                                                                                                                                                                                                                                    |
| regulation of primary metabolic process                      | GO:0080090 | 1.23E-03 | 8.16E-03 | Fstl3,83554:down Igf1,16000:up Adm,11535:up Flrt2,399558:down Tfrc,21426:up Sfrp4,20379:up C3,12266:up Ankrd1,107765:down Lyl1,17095:up Igf1,16000:up Cd109,235505:down Loxl2,94352:down Plk2,20620:down Loxl3,16950:down Trf,22041:up Cd24a,12484:down Wnt5a,22418:down Il1rn,16181:up Mabob,109731:up Adipoq,11450:up Bmp4,12159:up Igf1,16000:up Tgfb2,21808:down Ptgir,19222:up F3,14066:up Fgfr2,14183:up Htr2b,15559:down Kng1,16644:up Prl2c2,18811:up Efemp1,216616:up Ccl6,20305:up Slpi,20568:up Aspn,66695:down Vdr,22337:down Fabp4,11770:up Fam132b,227358:down Htr2a,15558:down Oas3,246727:up Slc40a1,53945:up Gas6,14456:up Egfr,13649:down Sfrp1,20377:up C1qtnf3,81799:down Tgfb3,21814:up Tfrc,22042:up Ceacam1,26365:up Ccl8,20307:up Sfrp2,20319:up Serpina3g,20715:up Fam20a,208659:down Npt1,114249:up Tnfrsf11b,18383:up Prkar2b,19088:up S100a1,20193:up Igf1,16000:up Epas1,13819:up Htra3,78558:down Uchl5,56207:up Sdpr,20324:down Ptx3,19288:up Akr1c18,105349:up Ccl12,20293:up Bmpr1a,12166:down Ccl4,20303:up Ret,19713:up Prg4,96875:down Ppp3,67916:up Creb3l1,26427:down Kitl,17311:up Ccl9,20308:up Inhba,16323:down Ras11a,68895:up Bnc2,242509:down Plat,18791:down Ccl3,20302:up Tfpi2,21789:down Ctla2a,13024:down Crlf1,12931:down Vegfa,22339:down Serpine2,20720:up Lrrc15,74488:down Nxn,18230:down Igf2,16002:up Pparg,19016:up Tnf,21926:up Glp1r,14652:down Lmcd1,30937:up Fgfr1,14182:down Has2,15117:down Hmox1,15368:up Sulf1,240725:down Cd4,12504:up Grem1,23892:up Phf11d,219132:up Tbx15,21384:down Serping1,12258:up Errfi1,74155:down Enpp1,18605:down |
| ventricular cardiac muscle tissue morphogenesis              | GO:0055010 | 1.26E-03 | 8.31E-03 | Col11a1,12814:down Tgfb2,21808:down Bmpr1a,12166:down Tgfb3,21814:up Fgfr2,14183:up                                                                                                                                                                                                                                                                                                                                                                                                                                                                                                                                                                                                                                                                                                                                                                                                                                                                                                                                                                                                                                                                                                                                                                                                                                                                                                                                                                                                                                                                                                                            |
| embryonic cranial skeleton morphogenesis                     | GO:0048701 | 1.26E-03 | 8.31E-03 | Chst11,58250:down Tbx15,21384:down Tgfb2,21808:down Fgfr2,14183:up Bmp4,12159:up                                                                                                                                                                                                                                                                                                                                                                                                                                                                                                                                                                                                                                                                                                                                                                                                                                                                                                                                                                                                                                                                                                                                                                                                                                                                                                                                                                                                                                                                                                                               |
| branching involved in salivary gland morphogenesis           | GO:0060445 | 1.32E-03 | 8.68E-03 | Tnf,21926:up Fgfr1,14182:down Plxnd1,67784:up Fgfr2,14183:up                                                                                                                                                                                                                                                                                                                                                                                                                                                                                                                                                                                                                                                                                                                                                                                                                                                                                                                                                                                                                                                                                                                                                                                                                                                                                                                                                                                                                                                                                                                                                   |
| endocytosis                                                  | GO:0006897 | 1.32E-03 | 8.68E-03 | Htr2b,15559:down Adm,11535:up Mrc1,17533:up Sfrp4,20379:up Ccl2,20296:up C3,12266:up Vegfa,22339:down Gas6,14456:up Pparg,19016:up Tnf,21926:up Ptx3,19288:up Trf,22041:up Cd24a,12484:down Wnt5a,22418:down Tfrc,22042:up Grem1,23892:up Adipoq,11450:up Mrc2,17534:down                                                                                                                                                                                                                                                                                                                                                                                                                                                                                                                                                                                                                                                                                                                                                                                                                                                                                                                                                                                                                                                                                                                                                                                                                                                                                                                                      |
| activation of protein kinase activity                        | GO:0032147 | 1.32E-03 | 8.68E-03 | Tnf,21926:up Gas6,14456:up Trf,22041:up Egfr,13649:down Wnt5a,22418:down Pdgfc,54635:down Igf1,16000:up Bmp4,12159:up Tgfb2,21808:down Vegfa,22339:down                                                                                                                                                                                                                                                                                                                                                                                                                                                                                                                                                                                                                                                                                                                                                                                                                                                                                                                                                                                                                                                                                                                                                                                                                                                                                                                                                                                                                                                        |
| regulation of stress-activated MAPK cascade                  | GO:0032872 | 1.32E-03 | 8.68E-03 | Tnf,21926:up Trf,22041:up Sfrp1,20377:up Wnt5a,22418:down Sfrp4,20379:up Il1rn,16181:up Ceacam1,26365:up Sfrp2,20319:up Vegfa,22339:down Tgfb2,21808:down                                                                                                                                                                                                                                                                                                                                                                                                                                                                                                                                                                                                                                                                                                                                                                                                                                                                                                                                                                                                                                                                                                                                                                                                                                                                                                                                                                                                                                                      |
| cardiac chamber morphogenesis                                | GO:0003206 | 1.36E-03 | 8.88E-03 | Col11a1,12814:down Wnt5a,22418:down Bmpr1a,12166:down Tgfb3,21814:up Bmp4,12159:up Sfrp2,20319:up Tgfb2,21808:down Fgfr2,14183:up                                                                                                                                                                                                                                                                                                                                                                                                                                                                                                                                                                                                                                                                                                                                                                                                                                                                                                                                                                                                                                                                                                                                                                                                                                                                                                                                                                                                                                                                              |
| negative regulation of intracellular signal transduction     | GO:1902532 | 1.38E-03 | 9.02E-03 | Flrt2,399558:down Sfrp4,20379:up Aspn,66695:down Cxcl12,20315:up Serpine2,20720:up Lrrc15,74488:down Sfrp1,20377:up C1qtnf3,81799:down Adipoq,11450:up Bmp4,12159:up Igf1,16000:up Ceacam1,26365:up Sfrp2,20319:up Tgfb2,21808:down Creb3l1,26427:down Errfi1,74155:down Il1rl1,17082:down                                                                                                                                                                                                                                                                                                                                                                                                                                                                                                                                                                                                                                                                                                                                                                                                                                                                                                                                                                                                                                                                                                                                                                                                                                                                                                                     |

|                                                                                                 |            |          |          |                                                                                                                                                                                                                                                                                                                                                                                                                                                                                                                                                                                                                                                                                                                                                                                                                                                             |
|-------------------------------------------------------------------------------------------------|------------|----------|----------|-------------------------------------------------------------------------------------------------------------------------------------------------------------------------------------------------------------------------------------------------------------------------------------------------------------------------------------------------------------------------------------------------------------------------------------------------------------------------------------------------------------------------------------------------------------------------------------------------------------------------------------------------------------------------------------------------------------------------------------------------------------------------------------------------------------------------------------------------------------|
| regulation of stress-activated protein kinase signaling cascade                                 | GO:0070302 | 1.38E-03 | 9.02E-03 | Tnf,21926:up Trf,22041:up Sfrp1,20377:up Wnt5a,22418:down Sfrp4,20379:up Il1rn,16181:up Ceacam1,26365:up Sfrp2,20319:up Vegfa,22339:down Tgfb2,21808:down                                                                                                                                                                                                                                                                                                                                                                                                                                                                                                                                                                                                                                                                                                   |
| regulation of extrinsic apoptotic signaling pathway in absence of ligand                        | GO:2001239 | 1.39E-03 | 9.08E-03 | Tnf,21926:up Fgfr1,14182:down Tgfb2,21808:down Inhba,16323:down Cx3cr1,13051:down                                                                                                                                                                                                                                                                                                                                                                                                                                                                                                                                                                                                                                                                                                                                                                           |
| regulation of reactive oxygen species biosynthetic process                                      | GO:1903426 | 1.41E-03 | 9.22E-03 | Tnf,21926:up Ptx3,19288:up Ddah1,69219:down Egfr,13649:down Ptgs2,19225:down Igf1,16000:up                                                                                                                                                                                                                                                                                                                                                                                                                                                                                                                                                                                                                                                                                                                                                                  |
| receptor metabolic process                                                                      | GO:0043112 | 1.42E-03 | 9.24E-03 | Htr2b,15559:down Tnf,21926:up Pparg,19016:up Adm,11535:up Sfrp4,20379:up Tfrc,22042:up Grem1,23892:up Adipoq,11450:up Vegfa,22339:down                                                                                                                                                                                                                                                                                                                                                                                                                                                                                                                                                                                                                                                                                                                      |
| mesodermal cell fate specification                                                              | GO:0007501 | 1.46E-03 | 9.43E-03 | Sfrp2,20319:up Fgfr1,14182:down Bmpr1a,12166:down                                                                                                                                                                                                                                                                                                                                                                                                                                                                                                                                                                                                                                                                                                                                                                                                           |
| negative regulation of leukocyte mediated cytotoxicity                                          | GO:0001911 | 1.46E-03 | 9.43E-03 | Ceacam1,26365:up Clec2d,93694:up Igf2,16002:up                                                                                                                                                                                                                                                                                                                                                                                                                                                                                                                                                                                                                                                                                                                                                                                                              |
| positive regulation of T cell apoptotic process                                                 | GO:0070234 | 1.46E-03 | 9.43E-03 | Ceacam1,26365:up Wnt5a,22418:down Tgfb2,21808:down                                                                                                                                                                                                                                                                                                                                                                                                                                                                                                                                                                                                                                                                                                                                                                                                          |
| regulation of vitamin metabolic process                                                         | GO:0030656 | 1.46E-03 | 9.43E-03 | Vdr,22337:down Tnf,21926:up Akr1c18,105349:up                                                                                                                                                                                                                                                                                                                                                                                                                                                                                                                                                                                                                                                                                                                                                                                                               |
| regulation of heat generation                                                                   | GO:0031650 | 1.46E-03 | 9.43E-03 | Tnf,21926:up Ptgs2,19225:down Ednrb,13618:up                                                                                                                                                                                                                                                                                                                                                                                                                                                                                                                                                                                                                                                                                                                                                                                                                |
| retinal metabolic process                                                                       | GO:0042574 | 1.46E-03 | 9.43E-03 | Akr1c18,105349:up Aldh1a2,19378:up Aldh1a3,56847:down                                                                                                                                                                                                                                                                                                                                                                                                                                                                                                                                                                                                                                                                                                                                                                                                       |
| regulation of odontogenesis of dentin-containing tooth                                          | GO:0042487 | 1.46E-03 | 9.43E-03 | Rspo2,239405:up Tnfrsf11b,18383:up Bmp4,12159:up                                                                                                                                                                                                                                                                                                                                                                                                                                                                                                                                                                                                                                                                                                                                                                                                            |
| neural tube closure                                                                             | GO:0001843 | 1.47E-03 | 9.48E-03 | Cthrc1,68588:down Sfrp2,20319:up Adm,11535:up Sfrp1,20377:up Ptk7,71461:down Wnt5a,22418:down Bmp4,12159:up                                                                                                                                                                                                                                                                                                                                                                                                                                                                                                                                                                                                                                                                                                                                                 |
| positive regulation of Wnt signaling pathway                                                    | GO:0030177 | 1.47E-03 | 9.48E-03 | Sfrp2,20319:up Sfrp1,20377:up Sulf1,240725:down Wnt5a,22418:down Rspo2,239405:up Sfrp4,20379:up Fgfr2,14183:up                                                                                                                                                                                                                                                                                                                                                                                                                                                                                                                                                                                                                                                                                                                                              |
| positive regulation of transmembrane receptor protein serine/threonine kinase signaling pathway | GO:0090100 | 1.47E-03 | 9.48E-03 | Sulf1,240725:down Tgfb2,21808:down Inhba,16323:down Bmpr1a,12166:down Tgfb3,21814:up Nptn,114249:up Bmp4,12159:up                                                                                                                                                                                                                                                                                                                                                                                                                                                                                                                                                                                                                                                                                                                                           |
| regulation of blood vessel size                                                                 | GO:0050880 | 1.49E-03 | 9.56E-03 | Htr2b,15559:down Kng1,16644:up Adm,11535:up Egfr,13649:down Tgfb3,21814:up Ptgs2,19225:down Ednrb,13618:up Htr2a,15558:down Mmp2,17390:down                                                                                                                                                                                                                                                                                                                                                                                                                                                                                                                                                                                                                                                                                                                 |
| sensory perception of pain                                                                      | GO:0019233 | 1.51E-03 | 9.69E-03 | Tnf,21926:up Fgfr1,14182:down Ncam1,17967:down Mme,17380:up Ptgs2,19225:down Il1rn,16181:up Ednrb,13618:up Htr2a,15558:down                                                                                                                                                                                                                                                                                                                                                                                                                                                                                                                                                                                                                                                                                                                                 |
| regulation of keratinocyte differentiation                                                      | GO:0045616 | 1.52E-03 | 9.69E-03 | Vdr,22337:down Tgfb2,21808:down Cd109,235505:down Errfi1,74155:down                                                                                                                                                                                                                                                                                                                                                                                                                                                                                                                                                                                                                                                                                                                                                                                         |
| positive regulation of leukocyte apoptotic process                                              | GO:2000108 | 1.52E-03 | 9.69E-03 | Ceacam1,26365:up Cd24a,12484:down Wnt5a,22418:down Tgfb2,21808:down                                                                                                                                                                                                                                                                                                                                                                                                                                                                                                                                                                                                                                                                                                                                                                                         |
| positive regulation of tissue remodeling                                                        | GO:0034105 | 1.52E-03 | 9.69E-03 | Vdr,22337:down Trf,22041:up Egfr,13649:down Tfrc,22042:up                                                                                                                                                                                                                                                                                                                                                                                                                                                                                                                                                                                                                                                                                                                                                                                                   |
| negative regulation of cellular metabolic process                                               | GO:0031324 | 1.52E-03 | 9.69E-03 | Flrt2,399558:down Sfrp4,20379:up Ednrb,13618:up Cst7,13011:up Epas1,13819:up Ankrd1,107765:down Gfbp3,16009:up Cd109,235505:down Loxl2,94352:down Loxl3,16950:down Akr1c18,105349:up Ptx3,19288:up Wnt5a,22418:down Ccl4,20303:up Adipoq,11450:up Bmp4,12159:up Igf1,16000:up Prg4,96875:down Tgfb2,21808:down Plpp3,67916:up Fgfr2,14183:up Htr2b,15559:down Kng1,16644:up Hp,15439:up Slpi,20568:up Aspn,66695:down Plat,18791:down Tfpi2,21789:down Vdr,22337:down Ctla2a,13024:down Fabp4,11770:up Vegfa,22339:down Serpine2,20720:up Lrrc15,74488:down Nxn,18230:down Pparg,19016:up Gas6,14456:up Tnf,21926:up Lmcd1,30937:up Fgfr1,14182:down Egfr,13649:down Hmox1,15368:up Sfrp1,20377:up C1qtnf3,81799:down Grem1,23892:up Ceacam1,26365:up Sfrp2,20319:up Serpina3g,20715:up Prkar2b,19088:up Errfi1,74155:down Enpp1,18605:down S100a1,20193:up |
| negative regulation of myeloid cell differentiation                                             | GO:0045638 | 1.53E-03 | 9.69E-03 | Fstl3,83554:down Ceacam1,26365:up Clec2d,93694:up Lrrc17,74511:down Sfrp1,20377:up Adipoq,11450:up                                                                                                                                                                                                                                                                                                                                                                                                                                                                                                                                                                                                                                                                                                                                                          |
| regulation of cytokine-mediated signaling pathway                                               | GO:0001959 | 1.53E-03 | 9.69E-03 | Pparg,19016:up Gas6,14456:up Cd24a,12484:down Wnt5a,22418:down Il1rn,16181:up Adipoq,11450:up                                                                                                                                                                                                                                                                                                                                                                                                                                                                                                                                                                                                                                                                                                                                                               |
| negative regulation of ossification                                                             | GO:0030279 | 1.53E-03 | 9.69E-03 | Fam101b,76566:down Tnf,21926:up Fgfr1,14182:down Sfrp1,20377:up Enpp1,18605:down Grem1,23892:up                                                                                                                                                                                                                                                                                                                                                                                                                                                                                                                                                                                                                                                                                                                                                             |
| cardiac ventricle morphogenesis                                                                 | GO:0003208 | 1.53E-03 | 9.69E-03 | Sfrp2,20319:up Col11a1,12814:down Tgfb2,21808:down Bmpr1a,12166:down Tgfb3,21814:up Fgfr2,14183:up                                                                                                                                                                                                                                                                                                                                                                                                                                                                                                                                                                                                                                                                                                                                                          |
| detection of mechanical stimulus                                                                | GO:0050982 | 1.53E-03 | 9.71E-03 | Tnf,21926:up Col11a1,12814:down Htr2a,15558:down Serpine2,20720:up Igf1,16000:up                                                                                                                                                                                                                                                                                                                                                                                                                                                                                                                                                                                                                                                                                                                                                                            |
| positive regulation of reactive oxygen species biosynthetic process                             | GO:1903428 | 1.53E-03 | 9.71E-03 | Tnf,21926:up Ptx3,19288:up Ddah1,69219:down Egfr,13649:down Ptgs2,19225:down                                                                                                                                                                                                                                                                                                                                                                                                                                                                                                                                                                                                                                                                                                                                                                                |
| establishment of planar polarity                                                                | GO:0001736 | 1.53E-03 | 9.71E-03 | Cthrc1,68588:down Sfrp2,20319:up Sfrp1,20377:up Ptk7,71461:down Wnt5a,22418:down                                                                                                                                                                                                                                                                                                                                                                                                                                                                                                                                                                                                                                                                                                                                                                            |
| regulation of tube size                                                                         | GO:0035150 | 1.56E-03 | 9.85E-03 | Htr2b,15559:down Kng1,16644:up Adm,11535:up Egfr,13649:down Tgfb3,21814:up Ptgs2,19225:down Ednrb,13618:up Htr2a,15558:down Mmp2,17390:down                                                                                                                                                                                                                                                                                                                                                                                                                                                                                                                                                                                                                                                                                                                 |

|                                                                                      |            |          |          |                                                                                                                                                                                                                                                                                                |
|--------------------------------------------------------------------------------------|------------|----------|----------|------------------------------------------------------------------------------------------------------------------------------------------------------------------------------------------------------------------------------------------------------------------------------------------------|
| cardiac septum development                                                           | GO:0003279 | 1.57E-03 | 9.88E-03 | Plxnd1,67784:up Ptk7,71461:down Wnt5a,22418:down Tgfb2,21808:down Bmpr1a,12166:down Fgfr2,14183:up Bmp4,12159:up                                                                                                                                                                               |
| regulation of striated muscle cell differentiation                                   | GO:0051153 | 1.57E-03 | 9.88E-03 | Ccl8,20307:up Cxcl9,17329:up Cxcl12,20315:up Wisp1,22402:down Grem1,23892:up Igf1,16000:up Bmp4,12159:up                                                                                                                                                                                       |
| tube closure                                                                         | GO:0060606 | 1.57E-03 | 9.88E-03 | Cthrc1,68588:down Sfrp2,20319:up Adm,11535:up Sfrp1,20377:up Ptk7,71461:down Wnt5a,22418:down Bmp4,12159:up                                                                                                                                                                                    |
| protein import                                                                       | GO:0017038 | 1.58E-03 | 9.95E-03 | Tnf,21926:up Gas6,14456:up Akr1c18,105349:up Egfr,13649:down C1qtnf3,81799:down Bmpr1a,12166:down Prgs2,19225:down Grem1,23892:up Igf1,16000:up Bmp4,12159:up Ceacam1,26365:up Sfrp2,20319:up Tgfb2,21808:down                                                                                 |
| regulation of striated muscle tissue development                                     | GO:0016202 | 1.59E-03 | 1.00E-02 | Fgfr1,14182:down Ncam1,17967:down Bmpr1a,12166:down Wisp1,22402:down Grem1,23892:up Igf1,16000:up Bmp4,12159:up Fgfr2,14183:up                                                                                                                                                                 |
| gliogenesis                                                                          | GO:0042063 | 1.60E-03 | 1.00E-02 | Pparg,19016:up Trf,22041:up Egfr,13649:down Efemp1,216616:up Ccl2,20296:up Ccl12,20293:up Ccl3,20302:up Igf1,16000:up Bmp4,12159:up Tgfb2,21808:down Ppp3,67916:up Serpine2,20720:up                                                                                                           |
| regulation of blood circulation                                                      | GO:1903522 | 1.62E-03 | 1.01E-02 | Glp1r,14652:down Fxyd1,56188:up Adm,11535:up Egfr,13649:down Ptgs2,19225:down Stc1,20855:up Epas1,13819:up Tgfb2,21808:down Htr2a,15558:down Mmp2,17390:down S100a1,20193:up                                                                                                                   |
| striated muscle tissue development                                                   | GO:0014706 | 1.66E-03 | 1.04E-02 | Fgfr1,14182:down Col11a1,12814:down Ncam1,17967:down Wnt5a,22418:down Bmpr1a,12166:down Tgfb3,21814:up Aldh1a2,19378:up Wisp1,22402:down Grem1,23892:up Igf1,16000:up Bmp4,12159:up Ankrd1,107765:down Vegfa,22339:down Tgfb2,21808:down Fgfr2,14183:up                                        |
| inner ear morphogenesis                                                              | GO:0042472 | 1.67E-03 | 1.04E-02 | Cthrc1,68588:down Fgfr1,14182:down Col11a1,12814:down Ptk7,71461:down Wnt5a,22418:down Aldh1a3,56847:down Fgfr2,14183:up                                                                                                                                                                       |
| establishment of tissue polarity                                                     | GO:0007164 | 1.69E-03 | 1.05E-02 | Cthrc1,68588:down Sfrp2,20319:up Sfrp1,20377:up Ptk7,71461:down Wnt5a,22418:down                                                                                                                                                                                                               |
| negative regulation of transforming growth factor beta receptor signaling pathway    | GO:0030512 | 1.69E-03 | 1.05E-02 | Htra3,78558:down Chst11,58250:down Tgfb3,21814:up Cd109,235505:down Aspn,66695:down                                                                                                                                                                                                            |
| positive regulation of neural precursor cell proliferation                           | GO:2000179 | 1.69E-03 | 1.05E-02 | Prl2c2,18811:up Trf,22041:up Vegfa,22339:down Cx3cr1,13051:down Igf1,16000:up                                                                                                                                                                                                                  |
| neural precursor cell proliferation                                                  | GO:0061351 | 1.71E-03 | 1.06E-02 | Prl2c2,18811:up Trf,22041:up Fgfr1,14182:down Cd24a,12484:down Wnt5a,22418:down Igf1,16000:up Vegfa,22339:down Cx3cr1,13051:down Fgfr2,14183:up                                                                                                                                                |
| regulation of cardiac muscle cell differentiation                                    | GO:2000725 | 1.74E-03 | 1.08E-02 | Wisp1,22402:down Grem1,23892:up Igf1,16000:up Bmp4,12159:up                                                                                                                                                                                                                                    |
| regulation of endothelial cell differentiation                                       | GO:0045601 | 1.74E-03 | 1.08E-02 | Ceacam1,26365:up Tnf,21926:up Vegfa,22339:down Bmp4,12159:up                                                                                                                                                                                                                                   |
| monosaccharide metabolic process                                                     | GO:0005996 | 1.74E-03 | 1.08E-02 | Tnf,21926:up Igf1,16000:up Fgfr1,14182:down C1qtnf3,81799:down Igf1,16000:up Adipoq,11450:up Sord,20322:up Igf1,16000:up Enpp1,18605:down Igf2,16002:up Man2a2,140481:up                                                                                                                       |
| regulation of muscle organ development                                               | GO:0048634 | 1.77E-03 | 1.09E-02 | Fgfr1,14182:down Ncam1,17967:down Bmpr1a,12166:down Wisp1,22402:down Grem1,23892:up Igf1,16000:up Bmp4,12159:up Fgfr2,14183:up                                                                                                                                                                 |
| viral genome replication                                                             | GO:0019079 | 1.77E-03 | 1.09E-02 | Ceacam1,26365:up Tnf,21926:up Gas6,14456:up Oasl1,231655:up Slpi,20568:up Oas3,246727:up                                                                                                                                                                                                       |
| immunoglobulin mediated immune response                                              | GO:0016064 | 1.77E-03 | 1.09E-02 | Tnf,21926:up C1s1,50908:up Serp1,12258:up C1s2,317677:up C3,12266:up C1rb,667277:up Tfrc,22042:up                                                                                                                                                                                              |
| endothelium development                                                              | GO:0003158 | 1.77E-03 | 1.09E-02 | Ceacam1,26365:up Tnf,21926:up Vegfa,22339:down Stc1,20855:up Adamts12,239337:down Slc40a1,53945:up Bmp4,12159:up                                                                                                                                                                               |
| regulation of leukocyte mediated immunity                                            | GO:0002703 | 1.79E-03 | 1.10E-02 | Tnf,21926:up Clec2d,93694:up Cd24a,12484:down Hmox1,15368:up Ccl2,20296:up C3,12266:up Tfrc,22042:up Ceacam1,26365:up Igf2,16002:up                                                                                                                                                            |
| regulation of cell-substrate adhesion                                                | GO:0010810 | 1.79E-03 | 1.10E-02 | Has2,15117:down Col8a1,12837:down Grem1,23892:up Nin1,18081:up Gpm6b,14758:up Vegfa,22339:down Postn,50706:down Npnt,114249:up Smoc2,64074:down                                                                                                                                                |
| negative regulation of kinase activity                                               | GO:0033673 | 1.81E-03 | 1.11E-02 | Flrt2,399558:down Sfrp1,20377:up Aspn,66695:down Bmp4,12159:up Adipoq,11450:up Ceacam1,26365:up Sfrp2,20319:up Fgfr1,14182:up Prkar2b,19088:up Lrrc15,74488:down Errfi1,74155:down                                                                                                             |
| anion transport                                                                      | GO:0006820 | 1.81E-03 | 1.11E-02 | Sfrp4,20379:up Gpm6b,14758:up Fam132b,227358:down Cxcl12,20315:up Htr2a,15558:down Slc16a4,229699:down Pparg,19016:up Tnf,21926:up Fxyd1,56188:up Fgfr1,14182:down Il1rn,16181:up Stc1,20855:up Snccg,20618:up Serinc2,230779:down Maob,109731:up Ank,11732:down Emb,13723:up Enpp1,18605:down |
| positive regulation of cell adhesion mediated by integrin                            | GO:0033630 | 1.83E-03 | 1.12E-02 | Cd24a,12484:down Ret,19713:up Tgfb2,21808:down                                                                                                                                                                                                                                                 |
| regulation of mesoderm development                                                   | GO:2000380 | 1.83E-03 | 1.12E-02 | Sfrp2,20319:up Fgfr1,14182:down Bmpr1a,12166:down                                                                                                                                                                                                                                              |
| involved in coronary vascular morphogenesis                                          | GO:0060979 | 1.83E-03 | 1.12E-02 | Fgfr1,14182:down Tgfb3,21814:up Fgfr2,14183:up                                                                                                                                                                                                                                                 |
| negative regulation of bone resorption                                               | GO:0045779 | 1.83E-03 | 1.12E-02 | Ceacam1,26365:up Vegfa,22339:down Tnfrsf11b,18383:up                                                                                                                                                                                                                                           |
| negative regulation of cellular response to transforming growth factor beta stimulus | GO:1903845 | 1.85E-03 | 1.13E-02 | Htra3,78558:down Chst11,58250:down Tgfb3,21814:up Cd109,235505:down Aspn,66695:down                                                                                                                                                                                                            |
| lung alveolus development                                                            | GO:0048286 | 1.85E-03 | 1.13E-02 | Vegfa,22339:down Errfi1,74155:down Fgfr2,14183:up Igf1,16000:up Bmp4,12159:up                                                                                                                                                                                                                  |
| regulation of muscle tissue development                                              | GO:1901861 | 1.86E-03 | 1.13E-02 | Fgfr1,14182:down Ncam1,17967:down Bmpr1a,12166:down Wisp1,22402:down Grem1,23892:up Igf1,16000:up Bmp4,12159:up Fgfr2,14183:up                                                                                                                                                                 |

|                                                                         |            |          |          |                                                                                                                                                                                                                                                                                                                                                                                                                                                                                                                                                                                                                                                                                                                                                                                                                                                                                                                                                                                                                                                                                                                                                                                                                                                  |
|-------------------------------------------------------------------------|------------|----------|----------|--------------------------------------------------------------------------------------------------------------------------------------------------------------------------------------------------------------------------------------------------------------------------------------------------------------------------------------------------------------------------------------------------------------------------------------------------------------------------------------------------------------------------------------------------------------------------------------------------------------------------------------------------------------------------------------------------------------------------------------------------------------------------------------------------------------------------------------------------------------------------------------------------------------------------------------------------------------------------------------------------------------------------------------------------------------------------------------------------------------------------------------------------------------------------------------------------------------------------------------------------|
| positive regulation of immune effector process                          | GO:0002699 | 1.87E-03 | 1.14E-02 | Tnf,21926:up Cd24a,12484:down Hmox1,15368:up Wnt5a,22418:down Ccl2,20296:up C3,12266:up Tfrc,2042:up Sema7a,20361:down Ceacam1,26365:up                                                                                                                                                                                                                                                                                                                                                                                                                                                                                                                                                                                                                                                                                                                                                                                                                                                                                                                                                                                                                                                                                                          |
| regulation of JUN kinase activity                                       | GO:0043506 | 1.90E-03 | 1.14E-02 | Tnf,21926:up Trf,22041:up Sfrp2,20319:up Sfrp1,20377:up Wnt5a,22418:down Irl1,16181:up                                                                                                                                                                                                                                                                                                                                                                                                                                                                                                                                                                                                                                                                                                                                                                                                                                                                                                                                                                                                                                                                                                                                                           |
| receptor-mediated virion attachment to host cell                        | GO:0046813 | 1.91E-03 | 1.14E-02 | Gas6,14456:up Lrrc15,74488:down                                                                                                                                                                                                                                                                                                                                                                                                                                                                                                                                                                                                                                                                                                                                                                                                                                                                                                                                                                                                                                                                                                                                                                                                                  |
| positive regulation of phosphatidylinositol biosynthetic process        | GO:0010513 | 1.91E-03 | 1.14E-02 | Htr2b,15559:down Htr2a,15558:down                                                                                                                                                                                                                                                                                                                                                                                                                                                                                                                                                                                                                                                                                                                                                                                                                                                                                                                                                                                                                                                                                                                                                                                                                |
| response to prostaglandin D                                             | GO:0071798 | 1.91E-03 | 1.14E-02 | Akr1c18,105349:up Ptgir,19222:up                                                                                                                                                                                                                                                                                                                                                                                                                                                                                                                                                                                                                                                                                                                                                                                                                                                                                                                                                                                                                                                                                                                                                                                                                 |
| porphyrin-containing compound catabolic process                         | GO:0006787 | 1.91E-03 | 1.14E-02 | Hmox1,15368:up Blvrb,233016:up                                                                                                                                                                                                                                                                                                                                                                                                                                                                                                                                                                                                                                                                                                                                                                                                                                                                                                                                                                                                                                                                                                                                                                                                                   |
| negative regulation of alkaline phosphatase activity                    | GO:0010693 | 1.91E-03 | 1.14E-02 | Tnf,21926:up Tgfb2,21808:down                                                                                                                                                                                                                                                                                                                                                                                                                                                                                                                                                                                                                                                                                                                                                                                                                                                                                                                                                                                                                                                                                                                                                                                                                    |
| tetrapyrrole catabolic process                                          | GO:0033015 | 1.91E-03 | 1.14E-02 | Hmox1,15368:up Blvrb,233016:up                                                                                                                                                                                                                                                                                                                                                                                                                                                                                                                                                                                                                                                                                                                                                                                                                                                                                                                                                                                                                                                                                                                                                                                                                   |
| cellular response to cadmium ion                                        | GO:0071276 | 1.91E-03 | 1.14E-02 | Akr1c18,105349:up Hmox1,15368:up                                                                                                                                                                                                                                                                                                                                                                                                                                                                                                                                                                                                                                                                                                                                                                                                                                                                                                                                                                                                                                                                                                                                                                                                                 |
| cellular response to prostaglandin D stimulus                           | GO:0071799 | 1.91E-03 | 1.14E-02 | Akr1c18,105349:up Ptgir,19222:up                                                                                                                                                                                                                                                                                                                                                                                                                                                                                                                                                                                                                                                                                                                                                                                                                                                                                                                                                                                                                                                                                                                                                                                                                 |
| positive regulation of ovulation                                        | GO:0060279 | 1.91E-03 | 1.14E-02 | Inhba,16323:down Plat,18791:down                                                                                                                                                                                                                                                                                                                                                                                                                                                                                                                                                                                                                                                                                                                                                                                                                                                                                                                                                                                                                                                                                                                                                                                                                 |
| detoxification of copper ion                                            | GO:0010273 | 1.91E-03 | 1.14E-02 | Mt2,17750:up Mt1,17748:up                                                                                                                                                                                                                                                                                                                                                                                                                                                                                                                                                                                                                                                                                                                                                                                                                                                                                                                                                                                                                                                                                                                                                                                                                        |
| negative regulation of branching involved in ureteric bud morphogenesis | GO:0090191 | 1.91E-03 | 1.14E-02 | Grem1,23892:up Bmp4,12159:up                                                                                                                                                                                                                                                                                                                                                                                                                                                                                                                                                                                                                                                                                                                                                                                                                                                                                                                                                                                                                                                                                                                                                                                                                     |
| stress response to copper ion                                           | GO:1990169 | 1.91E-03 | 1.14E-02 | Mt2,17750:up Mt1,17748:up                                                                                                                                                                                                                                                                                                                                                                                                                                                                                                                                                                                                                                                                                                                                                                                                                                                                                                                                                                                                                                                                                                                                                                                                                        |
| peripheral nervous system axon regeneration                             | GO:0014012 | 1.91E-03 | 1.14E-02 | Tnc,21923:down Mmp2,17390:down                                                                                                                                                                                                                                                                                                                                                                                                                                                                                                                                                                                                                                                                                                                                                                                                                                                                                                                                                                                                                                                                                                                                                                                                                   |
| positive regulation of natural killer cell chemotaxis                   | GO:2000503 | 1.91E-03 | 1.14E-02 | Cxcl14,57266:down Ccl4,20303:up                                                                                                                                                                                                                                                                                                                                                                                                                                                                                                                                                                                                                                                                                                                                                                                                                                                                                                                                                                                                                                                                                                                                                                                                                  |
| ureter maturation                                                       | GO:0035799 | 1.91E-03 | 1.14E-02 | Ret,19713:up Aldh1a2,19378:up                                                                                                                                                                                                                                                                                                                                                                                                                                                                                                                                                                                                                                                                                                                                                                                                                                                                                                                                                                                                                                                                                                                                                                                                                    |
| single-organism transport                                               | GO:0044765 | 1.94E-03 | 1.16E-02 | Adm,11535:up Sfrp4,20379:up C3,12266:up Ankrd1,107765:down Trf,22041:up Cd24a,12484:down Wnt5a,22418:down Stc1,20855:up Irl1,16181:up Maob,109731:up Adipoq,11450:up Bmp4,12159:up Igf1,16000:up Mcoln2,68279:up Tgfb2,21808:down Fgfr2,14183:up Clec4e,56619:up Htr2b,15559:down Vdr,22337:down Fam132b,227358:down Cxcl12,20315:up Htr2a,15558:down Slc16a4,229699:down Slc40a1,53945:up Gas6,14456:up Egfr,13649:down Sec23a,20334:down Sfrp1,20377:up C1qtnf3,81799:down Tfrc,22042:up Fxyd2,11936:up Snca,20618:up Serinc2,230779:down Ceacam1,26365:up Sfrp2,20319:up Sytn13,80976:up S100a1,20193:up Ccl2,20296:up Ednrb,13618:up Mmp13,17386:up Slc29a1,63959:up Gpm6b,14758:up Clec4n,56620:up Steap1,70358:down Postn,50706:down Cdo1,12583:up Ptx3,19288:up Hvcn1,74096:up Akr1c18,105349:up Fabp5,16592:up Ncam1,17967:down Ccl12,20293:up Bmpr1a,12166:down Ccl4,20303:up Ank,11732:down Creb3l1,26427:down Irl1,17082:down Inhba,16323:down Ccl3,20302:up Vegfa,22339:down Serpine2,20720:up Anpep,16790:up Pparg,19016:up Tnf,21926:up Fxyd1,56188:up Glp1r,14652:down Fgfr1,14182:down Lpl,16956:up Hmox1,15368:up Cd4,12504:up Ptgs2,19225:down Grem1,23892:up Kcnj15,16516:down Mcoln3,171166:up Emb,13723:up Enpp1,18605:down |
| retinoic acid receptor signaling pathway                                | GO:0048384 | 1.98E-03 | 1.18E-02 | Crabp2,12904:down Akr1c18,105349:up Aldh1a2,19378:up Aldh1a3,56847:down                                                                                                                                                                                                                                                                                                                                                                                                                                                                                                                                                                                                                                                                                                                                                                                                                                                                                                                                                                                                                                                                                                                                                                          |
| cellular response to organonitrogen compound                            | GO:0071417 | 1.99E-03 | 1.18E-02 | Htr2b,15559:down Col5a2,12832:down Tnf,21926:up Pparg,19016:up Col1a2,12843:down Egfr,13649:down Sfrp1,20377:up Pdgc,54635:down Col3a1,12825:down Igf1,16000:up Adipoq,11450:up Mmp2,17390:down Enpp1,18605:down Igf2,16002:up                                                                                                                                                                                                                                                                                                                                                                                                                                                                                                                                                                                                                                                                                                                                                                                                                                                                                                                                                                                                                   |
| primary neural tube formation                                           | GO:0014020 | 1.99E-03 | 1.18E-02 | Cthrc1,68588:down Sfrp2,20319:up Adm,11535:up Sfrp1,20377:up Ptk7,71461:down Wnt5a,22418:down Bmp4,12159:up                                                                                                                                                                                                                                                                                                                                                                                                                                                                                                                                                                                                                                                                                                                                                                                                                                                                                                                                                                                                                                                                                                                                      |
| B cell mediated immunity                                                | GO:0019724 | 1.99E-03 | 1.18E-02 | Tnf,21926:up C1s1,50908:up Serp1,12258:up C1s2,317677:up C3,12266:up C1rb,667277:up Tfrc,22042:up                                                                                                                                                                                                                                                                                                                                                                                                                                                                                                                                                                                                                                                                                                                                                                                                                                                                                                                                                                                                                                                                                                                                                |
| protein activation cascade                                              | GO:0072376 | 2.03E-03 | 1.20E-02 | C1s1,50908:up Serp1,12258:up C1s2,317677:up C3,12266:up C1rb,667277:up                                                                                                                                                                                                                                                                                                                                                                                                                                                                                                                                                                                                                                                                                                                                                                                                                                                                                                                                                                                                                                                                                                                                                                           |
| negative regulation of wound healing                                    | GO:0061045 | 2.03E-03 | 1.20E-02 | Ceacam1,26365:up Kng1,16644:up Serp1,12258:up Serpine2,20720:up Cd109,235505:down                                                                                                                                                                                                                                                                                                                                                                                                                                                                                                                                                                                                                                                                                                                                                                                                                                                                                                                                                                                                                                                                                                                                                                |
| epidermal cell differentiation                                          | GO:0009913 | 2.04E-03 | 1.21E-02 | Fgfr1,14182:down Sfrp4,20379:up Ptgs2,19225:down Bmp4,12159:up Vdr,22337:down Mcoln3,171166:up Tgfb2,21808:down Cd109,235505:down Errfi1,74155:down                                                                                                                                                                                                                                                                                                                                                                                                                                                                                                                                                                                                                                                                                                                                                                                                                                                                                                                                                                                                                                                                                              |
| cognition                                                               | GO:0050890 | 2.09E-03 | 1.24E-02 | Plk2,20620:down Glp1r,14652:down Egfr,13649:down Ncam1,17967:down Ptgs2,19225:down Irl1,16181:up Igf1,16000:up Shroom4,208431:down Htr2a,15558:down Prkar2b,19088:up Cx3cr1,13051:down Igf2,16002:up                                                                                                                                                                                                                                                                                                                                                                                                                                                                                                                                                                                                                                                                                                                                                                                                                                                                                                                                                                                                                                             |
| positive regulation of calcium ion transport                            | GO:0051928 | 2.11E-03 | 1.25E-02 | Cxcl12,20315:up Ccl12,20293:up Cd4,12504:up Stc1,20855:up Ccl4,20303:up S100a1,20193:up Bmp4,12159:up                                                                                                                                                                                                                                                                                                                                                                                                                                                                                                                                                                                                                                                                                                                                                                                                                                                                                                                                                                                                                                                                                                                                            |
| regulation of glucose metabolic process                                 | GO:0010906 | 2.11E-03 | 1.25E-02 | Igfbp4,16010:up C1qtnf3,81799:down Igf3,16009:up Enpp1,18605:down Igf2,16002:up Igf1,16000:up Adipoq,11450:up                                                                                                                                                                                                                                                                                                                                                                                                                                                                                                                                                                                                                                                                                                                                                                                                                                                                                                                                                                                                                                                                                                                                    |



|                                                                   |            |          |          |                                                                                                                                                                                                                                                                                                                                                                                                                                                                                                                                                                                                                                                                                                                                                                                                                                                                                                                                                                                                                                                                                                                                                                                                                                                                                                                                                                                                                                                                        |
|-------------------------------------------------------------------|------------|----------|----------|------------------------------------------------------------------------------------------------------------------------------------------------------------------------------------------------------------------------------------------------------------------------------------------------------------------------------------------------------------------------------------------------------------------------------------------------------------------------------------------------------------------------------------------------------------------------------------------------------------------------------------------------------------------------------------------------------------------------------------------------------------------------------------------------------------------------------------------------------------------------------------------------------------------------------------------------------------------------------------------------------------------------------------------------------------------------------------------------------------------------------------------------------------------------------------------------------------------------------------------------------------------------------------------------------------------------------------------------------------------------------------------------------------------------------------------------------------------------|
| sensory organ morphogenesis                                       | GO:0090596 | 2.16E-03 | 1.27E-02 | Cthrc1,68588:down Col5a2,12832:down Fgfr1,14182:down Col11a1,12814:down Ptk7,71461:down Wnt5a,22418:down Col8a1,12837:down Bmp4,12159:up Col5a1,12831:down Vegfa,22339:down Aldh1a3,56847:down Fgfr2,14183:up                                                                                                                                                                                                                                                                                                                                                                                                                                                                                                                                                                                                                                                                                                                                                                                                                                                                                                                                                                                                                                                                                                                                                                                                                                                          |
| regulation of Wnt signaling pathway                               | GO:0030111 | 2.17E-03 | 1.28E-02 | Cthrc1,68588:down Sfrp1,20377:up Sulf1,240725:down Wnt5a,22418:down Sfrp4,20379:up Grem1,23892:up Sfrp2,20319:up Rspo2,239405:up Plpp3,67916:up Fgfr2,14183:up Nxn,18230:down                                                                                                                                                                                                                                                                                                                                                                                                                                                                                                                                                                                                                                                                                                                                                                                                                                                                                                                                                                                                                                                                                                                                                                                                                                                                                          |
| regulation of response to cytokine stimulus                       | GO:0060759 | 2.19E-03 | 1.29E-02 | Pparg,19016:up Gas6,14456:up Cd24a,12484:down Wnt5a,22418:down Il1rn,16181:up Adipoq,11450:up                                                                                                                                                                                                                                                                                                                                                                                                                                                                                                                                                                                                                                                                                                                                                                                                                                                                                                                                                                                                                                                                                                                                                                                                                                                                                                                                                                          |
| ventricular cardiac muscle tissue development                     | GO:0032229 | 2.22E-03 | 1.30E-02 | Col11a1,12814:down Tgfb2,21808:down Bmpr1a,12166:down Tgfb3,21814:up Fgfr2,14183:up                                                                                                                                                                                                                                                                                                                                                                                                                                                                                                                                                                                                                                                                                                                                                                                                                                                                                                                                                                                                                                                                                                                                                                                                                                                                                                                                                                                    |
| regulation of interleukin-1 production                            | GO:0032652 | 2.22E-03 | 1.30E-02 | Ceacam1,26365:up Gas6,14456:up Wnt5a,22418:down Errfi1,74155:down Ccl3,20302:up                                                                                                                                                                                                                                                                                                                                                                                                                                                                                                                                                                                                                                                                                                                                                                                                                                                                                                                                                                                                                                                                                                                                                                                                                                                                                                                                                                                        |
| face development                                                  | GO:0060324 | 2.22E-03 | 1.30E-02 | Wnt5a,22418:down Tgfb2,21808:down Aldh1a2,19378:up Aldh1a3,56847:down Mmp2,17390:down                                                                                                                                                                                                                                                                                                                                                                                                                                                                                                                                                                                                                                                                                                                                                                                                                                                                                                                                                                                                                                                                                                                                                                                                                                                                                                                                                                                  |
| cell fate commitment involved in formation of primary germ layer  | GO:0060795 | 2.24E-03 | 1.31E-02 | Sfrp2,20319:up Fgfr1,14182:down Bmpr1a,12166:down Bmp4,12159:up                                                                                                                                                                                                                                                                                                                                                                                                                                                                                                                                                                                                                                                                                                                                                                                                                                                                                                                                                                                                                                                                                                                                                                                                                                                                                                                                                                                                        |
| positive chemotaxis                                               | GO:0050918 | 2.24E-03 | 1.31E-02 | Cxcl12,20315:up Wnt5a,22418:down Vegfa,22339:down Figf,14205:up                                                                                                                                                                                                                                                                                                                                                                                                                                                                                                                                                                                                                                                                                                                                                                                                                                                                                                                                                                                                                                                                                                                                                                                                                                                                                                                                                                                                        |
| cell migration involved in sprouting angiogenesis                 | GO:002042  | 2.24E-03 | 1.31E-02 | Srp2,68792:down Vegfa,22339:down Ptgs2,19225:down Grem1,23892:up                                                                                                                                                                                                                                                                                                                                                                                                                                                                                                                                                                                                                                                                                                                                                                                                                                                                                                                                                                                                                                                                                                                                                                                                                                                                                                                                                                                                       |
| negative regulation of cytokine-mediated signaling pathway        | GO:001960  | 2.24E-03 | 1.31E-02 | Pparg,19016:up Gas6,14456:up Il1rn,16181:up Adipoq,11450:up                                                                                                                                                                                                                                                                                                                                                                                                                                                                                                                                                                                                                                                                                                                                                                                                                                                                                                                                                                                                                                                                                                                                                                                                                                                                                                                                                                                                            |
| regulation of retinoic acid receptor signaling pathway            | GO:0048385 | 2.26E-03 | 1.31E-02 | Crabp2,12904:down Akr1c18,105349:up Aldh1a3,56847:down                                                                                                                                                                                                                                                                                                                                                                                                                                                                                                                                                                                                                                                                                                                                                                                                                                                                                                                                                                                                                                                                                                                                                                                                                                                                                                                                                                                                                 |
| vitamin D metabolic process                                       | GO:0042359 | 2.26E-03 | 1.31E-02 | Vdr,22337:down Tnf,21926:up Fgfr1,14182:down                                                                                                                                                                                                                                                                                                                                                                                                                                                                                                                                                                                                                                                                                                                                                                                                                                                                                                                                                                                                                                                                                                                                                                                                                                                                                                                                                                                                                           |
| regulation of glomerulus development                              | GO:0090192 | 2.26E-03 | 1.31E-02 | Ret,19713:up Bmp4,12159:up Adipoq,11450:up                                                                                                                                                                                                                                                                                                                                                                                                                                                                                                                                                                                                                                                                                                                                                                                                                                                                                                                                                                                                                                                                                                                                                                                                                                                                                                                                                                                                                             |
| ureter development                                                | GO:0072189 | 2.26E-03 | 1.31E-02 | Ret,19713:up Aldh1a2,19378:up Bmp4,12159:up                                                                                                                                                                                                                                                                                                                                                                                                                                                                                                                                                                                                                                                                                                                                                                                                                                                                                                                                                                                                                                                                                                                                                                                                                                                                                                                                                                                                                            |
| regulation of cell fate specification                             | GO:0042659 | 2.26E-03 | 1.31E-02 | Sfrp2,20319:up Fgfr1,14182:down Bmpr1a,12166:down                                                                                                                                                                                                                                                                                                                                                                                                                                                                                                                                                                                                                                                                                                                                                                                                                                                                                                                                                                                                                                                                                                                                                                                                                                                                                                                                                                                                                      |
| embryonic skeletal system development                             | GO:0048706 | 2.27E-03 | 1.32E-02 | Col11a1,12814:down Sulf1,240725:down Wnt5a,22418:down Bmp4,12159:up Chst11,58250:down Tbx15,21384:down Tgfb2,21808:down Fgfr2,14183:up                                                                                                                                                                                                                                                                                                                                                                                                                                                                                                                                                                                                                                                                                                                                                                                                                                                                                                                                                                                                                                                                                                                                                                                                                                                                                                                                 |
| regulation of intracellular protein transport                     | GO:0033157 | 2.30E-03 | 1.33E-02 | Tnf,21926:up Gas6,14456:up Ic1,218333:down Egfr,13649:down C1qtnf3,81799:down Bmpr1a,12166:down Ccl2,20296:up Ptgs2,19225:down Grem1,23892:up Igf1,16000:up Bmp4,12159:up Adipoq,11450:up Ceacam1,26365:up Sfrp2,20319:up                                                                                                                                                                                                                                                                                                                                                                                                                                                                                                                                                                                                                                                                                                                                                                                                                                                                                                                                                                                                                                                                                                                                                                                                                                              |
| cellular protein metabolic process                                | GO:0044267 | 2.34E-03 | 1.35E-02 | Igf1,16000:up Frt2,399558:down Sfrp4,20379:up C3,12266:up Igf1,16000:up Cd109,235505:down Loxl2,94352:down Plk2,20620:down Trf,22041:up Cd24a,12484:down Fkbp14,231997:down Wnt5a,22418:down Mark1,226778:up Il1rn,16181:up Adipoq,11450:up Bmp4,12159:up Igf1,16000:up Tgfb2,21808:down F3,14066:up Fgfr2,14183:up Htr2b,15559:down Kng1,16644:up Efemp1,216616:up Ccl6,20305:up Sipi,20568:up Aspn,66695:down Saa3,20210:up Pdia5,72599:down Fabp4,11770:up Htr2a,15558:down Gas6,14456:up Egfr,13649:down Sfrp1,20377:up C1qtnf3,81799:down Tgfb3,21814:up Ceacam1,26365:up Ccl8,20307:up Sfrp2,20319:up Serpina3g,20715:up Fam20a,208659:down Npnt,114249:up Tnfrsf11b,18383:up Prkar2b,19088:up Neurl3,214854:down Ccl2,20296:up Ccl7,20306:up Pdzn3,55983:down Pdgfc,54635:down Cst7,13011:up Ednrb,13618:up Mmp13,17386:up Sema7a,20361:down Uchl5,56207:up Ddah1,69219:down Fkbp10,14230:down Dok2,13449:up Man2a2,140481:up Mamdc2,71738:down Ccl12,20293:up Bmpr1a,12166:down Ccl4,20303:up Ret,19713:up Vegfb,22340:up Sdf2l1,64136:up Plpp3,67916:up Kitl,17311:up P4ha1,18451:down Ccl9,20308:up Inhba,16323:down Plat,18791:down Ccl3,20302:up Tfpi2,21789:down Ctla2a,13024:down Crlf1,12931:down Vegfa,22339:down Serpine2,20720:up Adamts12,239337:down Lrrc15,74488:down Igf2,16002:up Nxn,18230:down Pparg,19016:up Tnf,21926:up Fgfr1,14182:down Cd4,12504:up Grem1,23892:up Col3a1,12825:down Serpin1,12258:up Errfi1,74155:down Enpp1,18605:down |
| regulation of production of molecular mediator of immune response | GO:002700  | 2.37E-03 | 1.37E-02 | Ceacam1,26365:up Tnf,21926:up Hmox1,15368:up Wnt5a,22418:down Tgfb2,21808:down Tfrc,22042:up Sema7a,20361:down                                                                                                                                                                                                                                                                                                                                                                                                                                                                                                                                                                                                                                                                                                                                                                                                                                                                                                                                                                                                                                                                                                                                                                                                                                                                                                                                                         |
| positive regulation of leukocyte proliferation                    | GO:0070665 | 2.38E-03 | 1.38E-02 | Cd24a,12484:down Cd4,12504:up Tfrc,22042:up Igf1,16000:up Ceacam1,26365:up Igf2,16002:up Kitl,17311:up Tnfsf9,21950:up                                                                                                                                                                                                                                                                                                                                                                                                                                                                                                                                                                                                                                                                                                                                                                                                                                                                                                                                                                                                                                                                                                                                                                                                                                                                                                                                                 |

|                                                                          |            |          |          |                                                                                                                                                                                                                                                                                                                                                                                                                                                                                                                                                                                                                                                                                                                                                                                                                                                                                                                                                                                                                                                                                                                                                                                                                                                                                                                                                                                                                                                                                                                                                                                                                                                                                                                                                                                                                                                                                                                                                                                                                                                                                                                                                                                                                                                                                                                                                                                                                                                                                                                                                                                                                                                                                                                                                                                                                                                                                                                                                                                                                                                                                                                                                                                                                                                                                                                                                                                                                                                                                                                                                                                                                                                                                                                                                                                             |
|--------------------------------------------------------------------------|------------|----------|----------|---------------------------------------------------------------------------------------------------------------------------------------------------------------------------------------------------------------------------------------------------------------------------------------------------------------------------------------------------------------------------------------------------------------------------------------------------------------------------------------------------------------------------------------------------------------------------------------------------------------------------------------------------------------------------------------------------------------------------------------------------------------------------------------------------------------------------------------------------------------------------------------------------------------------------------------------------------------------------------------------------------------------------------------------------------------------------------------------------------------------------------------------------------------------------------------------------------------------------------------------------------------------------------------------------------------------------------------------------------------------------------------------------------------------------------------------------------------------------------------------------------------------------------------------------------------------------------------------------------------------------------------------------------------------------------------------------------------------------------------------------------------------------------------------------------------------------------------------------------------------------------------------------------------------------------------------------------------------------------------------------------------------------------------------------------------------------------------------------------------------------------------------------------------------------------------------------------------------------------------------------------------------------------------------------------------------------------------------------------------------------------------------------------------------------------------------------------------------------------------------------------------------------------------------------------------------------------------------------------------------------------------------------------------------------------------------------------------------------------------------------------------------------------------------------------------------------------------------------------------------------------------------------------------------------------------------------------------------------------------------------------------------------------------------------------------------------------------------------------------------------------------------------------------------------------------------------------------------------------------------------------------------------------------------------------------------------------------------------------------------------------------------------------------------------------------------------------------------------------------------------------------------------------------------------------------------------------------------------------------------------------------------------------------------------------------------------------------------------------------------------------------------------------------------|
| biological_process                                                       | GO:0008150 | 2.41E-03 | 1.39E-02 | Fstl3,65554:down Igf1,16010:up Adm,11535:up Flrt2,399558:down Tmem176b,65963:up Ptx1,67784:up Tfec,21426:up Sfrp4,20379:up Ltp2,16997:down Serpinh1,12406:down Lyl1,17095:up Gstt1,14871:up Blvrb,233016:up Igf1,16000:up Bsp,15891:up Plk2,20620:down Cd24a,12484:down Mme,17380:up Fkbp14,231997:down Iln,16181:up Maob,109731:up Bmp4,12159:up Col12a1,12816:down Oas1,231655:up Hpse,15442:up Medag,70717:down Ptgir,19222:up Fgfr2,14183:up Thbs2,21826:down Htr2b,15559:down Mfsd12,73822:up Dram1,71712:up Ccl6,20305:up Gjb5,14622:down Anxa8,11752:down Slpi,20568:up Aspn,66695:down Mt2,17750:up Cxcr6,80901:down Sned1,20877:up Fam132b,227358:down Nabp1,109019:down Phf11a,219131:up Mmp2,17390:down Oas3,246727:up Pappa,18491:down Slc40a1,53945:up Egfr,13649:down Alpl,11647:up C1rb,667277:up Tfrc,22042:up Snccg,20618:up Ccl8,20307:up Gstm1,14862:up Serpina3g,20715:up Rspo2,239405:up Fam20a,208659:down Cdsn,386463:up Sytl3,80976:up Mt1,17748:up Col5a2,12832:down Mrc1,17533:up Ccl2,20296:up Aldh1a2,19378:up Ednrb,13618:up Ampd3,11717:up Mmp13,17386:up Htra3,78558:down Tnfrsf12a,27279:down Uchl5,56207:up Sord,20322:up Clec4n,56620:up Shroom4,208431:down Steap1,70358:down Enpp3,209558:down Cdo1,12583:up Dok2,13449:up Mamdc2,71738:down Csrp2,13008:down Hvcn1,74096:up Ptx3,19288:up Ncam1,17967:down Ccl4,20303:up Chst11,58250:down Tmeff1,230157:down Vegfb,22340:up Aldh1a3,56847:down Plpp3,67916:up Mrc2,17534:down Lrrc17,74511:down Lama2,16773:down Ccl9,20308:up Ptk7,71461:down Inhba,16323:down Gsta4,14860:up Bnc2,242509:down Tfpi2,21789:down Crfl1,12931:down C1s1,50908:up Plod2,26432:down Vegfa,22339:down Gfpt2,14584:down Serpine2,20720:up Cbr2,12409:up Nxn,18230:down Igf2,16002:up Kdelr3,105785:down Tmem176a,66058:up Tnf,21926:up Col1a2,12843:down Fxyd1,56188:up Fgfr1,14182:down Lpl,16956:up Sulf1,240725:down Susd2,71733:up Cd4,12504:up Col3a1,12825:down Tbx15,21384:down Serping1,12258:up Emb,13723:up Uck2,80914:down Enpp1,18605:down Clec2d,93694:up Hpgd,15446:up C3,12266:up Enpp5,83965:up Ankrd1,107765:down Cx3cr1,13051:down Cd109,235505:down Ggt5,23887:up Loxl2,94352:down Loxl3,16950:down Trf,22041:up Cxl14,57266:down Adam12,11489:down Ceacam10,26366:up Wnt5a,22418:down Mark1,226778:up Stc1,20855:up Col8a1,12837:down Adipoq,11450:up Hal,15109:up Igf1,16000:up Crabp2,12904:down Mcoln,68279:up Cxl9,17329:up Tgfb2,21808:down F3,14066:up Clec4e,56619:up Adamts4,240913:down Cthrc1,68588:down Kng1,16644:up Pr1c2,18811:up Efemp1,216616:up Dpysl3,22240:down Ninj1,18081:up Saa3,20210:up Gdpd1,66569:up Vdr,22337:down Pdia5,72599:down Fabp4,11770:up Cxl12,20315:up Htr2a,15558:down Slc16a4,229699:down Smoc2,64074:down Gas6,14456:up Col11a1,12814:down Sec23a,20334:down Sfrp1,20377:up C1qt,81799:down Tgfbr3,21814:up Fxyd2,11936:up Serinc2,230779:down Tll1,21892:down Ceacam1,26365:up Sfrp2,20319:up Pxdn,69675:down Pamr1,210622:up Tnfrsf11b,18383:up Prkar2b,19088:up Npnt,114249:up S100a1,20193:up Iccl1,218333:down Ly9,17085:up Neur3,214854:down Ccl7,20306:up Pdzn3,55983:down Pdgfr,54635:down Mgp,17313:up Figf,14205:up Cst7,13011:up Igf1,16000:up Sema7a,20361:down Epas1,13819:up Slc29a1,63959:up Marc1,66112:up Gpm6b,14758:up Ddah1,69219:down Sdrp,20324:down Fkbp10,14230:down Postn,50706:down Hspb7,29818:up Npl,74091:up Man2a2,140481:up Akr1c1,8105349:up Fabp5,16592:up Bmpr1a,12166:down Ccl12,20293:up Wisp1,22402:down Klk1b11,16613:up Ank,11732:down Tnc,21923:down Gatm,67092:down Ret,19713:up Prg4,96875:down C1s2,317677:up Pdxxk,216134:up Sdf2l1,64136:up Igf1,15957:up Creb3l1,26427:down Ilnr1,17082:down Kitl,17311:up Fam101b,76566:down P4ha1,18451:down Hn1,15439:up Apoab,27052:up Pax11a,68895:up Plat,18791:down Ccl3 |
| positive regulation of homotypic cell-cell adhesion                      | GO:0034112 | 2.43E-03 | 1.40E-02 | Cd24a,12484:down Has2,15117:down Ccl2,20296:up Cd4,12504:up Tfrc,22042:up Igf1,16000:up Ceacam1,26365:up Igf2,16002:up Tnfsf9,21950:up                                                                                                                                                                                                                                                                                                                                                                                                                                                                                                                                                                                                                                                                                                                                                                                                                                                                                                                                                                                                                                                                                                                                                                                                                                                                                                                                                                                                                                                                                                                                                                                                                                                                                                                                                                                                                                                                                                                                                                                                                                                                                                                                                                                                                                                                                                                                                                                                                                                                                                                                                                                                                                                                                                                                                                                                                                                                                                                                                                                                                                                                                                                                                                                                                                                                                                                                                                                                                                                                                                                                                                                                                                                      |
| regulation of carbohydrate metabolic process                             | GO:0006109 | 2.43E-03 | 1.40E-02 | Igf1,16010:up Has2,15117:down C1qtnf3,81799:down Igf1,16000:up Adipoq,11450:up Htr2a,15558:down Igf2,16002:up Enpp1,18605:down                                                                                                                                                                                                                                                                                                                                                                                                                                                                                                                                                                                                                                                                                                                                                                                                                                                                                                                                                                                                                                                                                                                                                                                                                                                                                                                                                                                                                                                                                                                                                                                                                                                                                                                                                                                                                                                                                                                                                                                                                                                                                                                                                                                                                                                                                                                                                                                                                                                                                                                                                                                                                                                                                                                                                                                                                                                                                                                                                                                                                                                                                                                                                                                                                                                                                                                                                                                                                                                                                                                                                                                                                                                              |
| regulation of protein targeting                                          | GO:1903533 | 2.46E-03 | 1.42E-02 | Tnf,21926:up Gas6,14456:up Egfr,13649:down C1qtnf3,81799:down Bmpr1a,12166:down Ccl2,20296:up Ptgs2,19225:down Grem1,23892:down Igf1,16000:up Bmp4,12159:up Ceacam1,26365:up Sfrp2,20319:up                                                                                                                                                                                                                                                                                                                                                                                                                                                                                                                                                                                                                                                                                                                                                                                                                                                                                                                                                                                                                                                                                                                                                                                                                                                                                                                                                                                                                                                                                                                                                                                                                                                                                                                                                                                                                                                                                                                                                                                                                                                                                                                                                                                                                                                                                                                                                                                                                                                                                                                                                                                                                                                                                                                                                                                                                                                                                                                                                                                                                                                                                                                                                                                                                                                                                                                                                                                                                                                                                                                                                                                                 |
| negative regulation of transferase activity                              | GO:0051348 | 2.46E-03 | 1.42E-02 | Pparg,19016:up Flrt2,399558:down Sfrp1,20377:up Aspn,66695:down Bmp4,12159:up Adipoq,11450:up Ceacam1,26365:up Sfrp2,20319:up Fabp4,11770:up Prkar2b,19088:up Lrrc15,74488:down Errfi1,74155:down                                                                                                                                                                                                                                                                                                                                                                                                                                                                                                                                                                                                                                                                                                                                                                                                                                                                                                                                                                                                                                                                                                                                                                                                                                                                                                                                                                                                                                                                                                                                                                                                                                                                                                                                                                                                                                                                                                                                                                                                                                                                                                                                                                                                                                                                                                                                                                                                                                                                                                                                                                                                                                                                                                                                                                                                                                                                                                                                                                                                                                                                                                                                                                                                                                                                                                                                                                                                                                                                                                                                                                                           |
| regulation of cell projection organization                               | GO:0031344 | 2.49E-03 | 1.43E-02 | Pr1c2,18811:up Efemp1,216616:up Ptx1,67784:up Ptk7,71461:down Dpysl3,22240:down Sema7a,20361:down Ankrd1,107765:down Tnfrsf12a,27279:down Cxl12,20315:up Vegfa,22339:down Serpine2,20720:up Plk2,20620:down Cd24a,12484:down Fgfr1,14182:down Sfrp1,20377:up Wnt5a,22418:down Bmp4,12159:up Sfrp2,20319:up Crabp2,12904:down Ret,19713:up                                                                                                                                                                                                                                                                                                                                                                                                                                                                                                                                                                                                                                                                                                                                                                                                                                                                                                                                                                                                                                                                                                                                                                                                                                                                                                                                                                                                                                                                                                                                                                                                                                                                                                                                                                                                                                                                                                                                                                                                                                                                                                                                                                                                                                                                                                                                                                                                                                                                                                                                                                                                                                                                                                                                                                                                                                                                                                                                                                                                                                                                                                                                                                                                                                                                                                                                                                                                                                                   |
| negative regulation of multi-organism process                            | GO:0043901 | 2.50E-03 | 1.43E-02 | Tnf,21926:up Ptx3,19288:up Slpi,20568:up Ccl4,20303:up Igf1,16000:up Ceacam1,26365:up Oas1,231655:up Oas3,246727:up                                                                                                                                                                                                                                                                                                                                                                                                                                                                                                                                                                                                                                                                                                                                                                                                                                                                                                                                                                                                                                                                                                                                                                                                                                                                                                                                                                                                                                                                                                                                                                                                                                                                                                                                                                                                                                                                                                                                                                                                                                                                                                                                                                                                                                                                                                                                                                                                                                                                                                                                                                                                                                                                                                                                                                                                                                                                                                                                                                                                                                                                                                                                                                                                                                                                                                                                                                                                                                                                                                                                                                                                                                                                         |
| regeneration                                                             | GO:0031099 | 2.50E-03 | 1.43E-02 | Adm,11535:up Tnc,21923:down Cxl12,20315:up Hmox1,15368:up Mmp2,17390:down Ninj1,18081:up Igf1,16000:up                                                                                                                                                                                                                                                                                                                                                                                                                                                                                                                                                                                                                                                                                                                                                                                                                                                                                                                                                                                                                                                                                                                                                                                                                                                                                                                                                                                                                                                                                                                                                                                                                                                                                                                                                                                                                                                                                                                                                                                                                                                                                                                                                                                                                                                                                                                                                                                                                                                                                                                                                                                                                                                                                                                                                                                                                                                                                                                                                                                                                                                                                                                                                                                                                                                                                                                                                                                                                                                                                                                                                                                                                                                                                      |
| negative regulation of stress-activated protein kinase signaling cascade | GO:0070303 | 2.52E-03 | 1.44E-02 | Ceacam1,26365:up Sfrp2,20319:up Sfrp1,20377:up Sfrp4,20379:up                                                                                                                                                                                                                                                                                                                                                                                                                                                                                                                                                                                                                                                                                                                                                                                                                                                                                                                                                                                                                                                                                                                                                                                                                                                                                                                                                                                                                                                                                                                                                                                                                                                                                                                                                                                                                                                                                                                                                                                                                                                                                                                                                                                                                                                                                                                                                                                                                                                                                                                                                                                                                                                                                                                                                                                                                                                                                                                                                                                                                                                                                                                                                                                                                                                                                                                                                                                                                                                                                                                                                                                                                                                                                                                               |
| regulation of collagen biosynthetic process                              | GO:0032965 | 2.52E-03 | 1.44E-02 | Pparg,19016:up Ccl2,20296:up Errfi1,74155:down Bmp4,12159:up                                                                                                                                                                                                                                                                                                                                                                                                                                                                                                                                                                                                                                                                                                                                                                                                                                                                                                                                                                                                                                                                                                                                                                                                                                                                                                                                                                                                                                                                                                                                                                                                                                                                                                                                                                                                                                                                                                                                                                                                                                                                                                                                                                                                                                                                                                                                                                                                                                                                                                                                                                                                                                                                                                                                                                                                                                                                                                                                                                                                                                                                                                                                                                                                                                                                                                                                                                                                                                                                                                                                                                                                                                                                                                                                |
| negative regulation of stress-activated MAPK cascade                     | GO:0032873 | 2.52E-03 | 1.44E-02 | Ceacam1,26365:up Sfrp2,20319:up Sfrp1,20377:up Sfrp4,20379:up                                                                                                                                                                                                                                                                                                                                                                                                                                                                                                                                                                                                                                                                                                                                                                                                                                                                                                                                                                                                                                                                                                                                                                                                                                                                                                                                                                                                                                                                                                                                                                                                                                                                                                                                                                                                                                                                                                                                                                                                                                                                                                                                                                                                                                                                                                                                                                                                                                                                                                                                                                                                                                                                                                                                                                                                                                                                                                                                                                                                                                                                                                                                                                                                                                                                                                                                                                                                                                                                                                                                                                                                                                                                                                                               |
| regulation of polysaccharide biosynthetic process                        | GO:0032885 | 2.52E-03 | 1.44E-02 | Has2,15117:down Enpp1,18605:down Igf2,16002:up Igf1,16000:up                                                                                                                                                                                                                                                                                                                                                                                                                                                                                                                                                                                                                                                                                                                                                                                                                                                                                                                                                                                                                                                                                                                                                                                                                                                                                                                                                                                                                                                                                                                                                                                                                                                                                                                                                                                                                                                                                                                                                                                                                                                                                                                                                                                                                                                                                                                                                                                                                                                                                                                                                                                                                                                                                                                                                                                                                                                                                                                                                                                                                                                                                                                                                                                                                                                                                                                                                                                                                                                                                                                                                                                                                                                                                                                                |
| proteolysis                                                              | GO:0006508 | 2.52E-03 | 1.44E-02 | C3,12266:up Cst7,13011:up Mmp13,17386:up Htra3,78558:down Uchl5,56207:up Cd109,235505:down Ggt5,23887:up Plk2,20620:down Adam12,11489:down Mme,17380:up Igf1,16000:up Klk1b11,16613:up Ret,19713:up C1s2,317677:up Sdf2l1,64136:up F3,14066:up Adamts4,240913:down Kng1,16644:up Hp,15439:up Slpi,20568:up Plat,18791:down Tfpi2,21789:down Ctla2a,13024:down C1s1,50908:up Vegfa,22339:down Serpine2,20720:up Mmp2,17390:down Adamts12,239337:down Anep,16790:up Pappa,18491:down Pparg,19016:up Gas6,14456:up Tnf,21926:up C1rb,667277:up Tll1,21892:down Sfrp2,20319:up Serping1,12258:up Serpina3g,20715:up Pamr1,210622:up                                                                                                                                                                                                                                                                                                                                                                                                                                                                                                                                                                                                                                                                                                                                                                                                                                                                                                                                                                                                                                                                                                                                                                                                                                                                                                                                                                                                                                                                                                                                                                                                                                                                                                                                                                                                                                                                                                                                                                                                                                                                                                                                                                                                                                                                                                                                                                                                                                                                                                                                                                                                                                                                                                                                                                                                                                                                                                                                                                                                                                                                                                                                                             |
| negative regulation of cell growth                                       | GO:0030308 | 2.54E-03 | 1.45E-02 | Pparg,19016:up Sfrp1,20377:up Wnt5a,22418:down Inhba,16323:down Grem1,23892:up Sfrp2,20319:up Tgfb2,21808:down Serpine2,20720:up Enpp1,18605:down                                                                                                                                                                                                                                                                                                                                                                                                                                                                                                                                                                                                                                                                                                                                                                                                                                                                                                                                                                                                                                                                                                                                                                                                                                                                                                                                                                                                                                                                                                                                                                                                                                                                                                                                                                                                                                                                                                                                                                                                                                                                                                                                                                                                                                                                                                                                                                                                                                                                                                                                                                                                                                                                                                                                                                                                                                                                                                                                                                                                                                                                                                                                                                                                                                                                                                                                                                                                                                                                                                                                                                                                                                           |
| leukocyte proliferation                                                  | GO:0070661 | 2.54E-03 | 1.45E-02 | Cd24a,12484:down Ccl12,20293:up Cd4,12504:up Tfrc,22042:up Grem1,23892:up Igf1,16000:up Bmp4,12159:up Ceacam1,26365:up Cxl12,20315:up Igf2,16002:up Kitl,17311:up Tnfsf9,21950:up                                                                                                                                                                                                                                                                                                                                                                                                                                                                                                                                                                                                                                                                                                                                                                                                                                                                                                                                                                                                                                                                                                                                                                                                                                                                                                                                                                                                                                                                                                                                                                                                                                                                                                                                                                                                                                                                                                                                                                                                                                                                                                                                                                                                                                                                                                                                                                                                                                                                                                                                                                                                                                                                                                                                                                                                                                                                                                                                                                                                                                                                                                                                                                                                                                                                                                                                                                                                                                                                                                                                                                                                           |

|                                                                          |            |          |          |                                                                                                                                                                                                                                                                                                                                                                                                                                    |
|--------------------------------------------------------------------------|------------|----------|----------|------------------------------------------------------------------------------------------------------------------------------------------------------------------------------------------------------------------------------------------------------------------------------------------------------------------------------------------------------------------------------------------------------------------------------------|
| chordate embryonic development                                           | GO:0043009 | 2.62E-03 | 1.49E-02 | Cthrc1,68588:down Adm,11535:up Ptk7,71461:down Gjb5,14622:down Aldh1a2,19378:up Epas1,13819:up Vegfa,22339:down Col11a1,12814:down Egfr,13649:down Fgfr1,14182:down Sfrp1,20377:up Sulf1,240725:down Wnt5a,22418:down Tgfb3,21814:up Bmpr1a,12166:down Bmp4,12159:up Igf1,16000:up Chst11,58250:down Sfrp2,20319:up Tbx15,21384:down Tgfb2,21808:down Fgfr2,14183:up                                                               |
| negative regulation of MAPK cascade                                      | GO:0043409 | 2.62E-03 | 1.49E-02 | Sfrp1,20377:up Sfrp4,20379:up Igf1,16000:up Bmp4,12159:up Adipoq,11450:up Ceacam1,26365:up Sfrp2,20319:up Errfi1,74155:down                                                                                                                                                                                                                                                                                                        |
| regulation of cytokine production involved in immune response            | GO:0002718 | 2.63E-03 | 1.49E-02 | Tnf,21926:up Hmox1,15368:up Wnt5a,22418:down Tgfb2,21808:down Sema7a,20361:down                                                                                                                                                                                                                                                                                                                                                    |
| mesoderm development                                                     | GO:0007498 | 2.65E-03 | 1.50E-02 | Sfrp2,20319:up Fgfr1,14182:down Wnt5a,22418:down Vegfa,22339:down Inhba,16323:down Bmpr1a,12166:down Bmp4,12159:up                                                                                                                                                                                                                                                                                                                 |
| regulation of extent of cell growth                                      | GO:0061387 | 2.65E-03 | 1.50E-02 | Tnfrsf12a,27279:down Crabp2,12904:down Plxnd1,67784:up Cxcl12,20315:up Wnt5a,22418:down Vegfa,22339:down Sema7a,20361:down                                                                                                                                                                                                                                                                                                         |
| response to nitrogen compound                                            | GO:1901698 | 2.67E-03 | 1.51E-02 | Htr2b,15559:down Col5a2,12832:down Pdgc,54635:down Htr2a,15558:down Mmp2,17390:down Igf2,16002:up Cdo1,12583:up Pparg,19016:up Tnf,21926:up Col1a2,12843:down Egfr,13649:down Ncam1,17967:down Hmox1,15368:up Sfrp1,20377:up Adipoq,11450:up Igf1,16000:up Col3a1,12825:down Gatm,67092:down Serpina3g,20715:up Ifft1,15957:up Enpp1,18605:down                                                                                    |
| vasculogenesis                                                           | GO:0001570 | 2.68E-03 | 1.51E-02 | Ceacam1,26365:up Adm,11535:up Fgfr1,14182:down Has2,15117:down Tgfb3,21814:up Fgfr2,14183:up                                                                                                                                                                                                                                                                                                                                       |
| cellular response to fibroblast growth factor stimulus                   | GO:0044344 | 2.68E-03 | 1.51E-02 | Flrt2,399558:down Fgfr1,14182:down Sfrp1,20377:up Sulf1,240725:down Wnt5a,22418:down Fgfr2,14183:up                                                                                                                                                                                                                                                                                                                                |
| muscle organ development                                                 | GO:0007517 | 2.72E-03 | 1.53E-02 | Fgfr1,14182:down Col11a1,12814:down Ncam1,17967:down Wnt5a,22418:down Bmpr1a,12166:down Tgfb3,21814:up Wisp1,22402:down Grem1,23892:up Col3a1,12825:down Igf1,16000:up Bmp4,12159:up Ankrd1,107765:down Tgfb2,21808:down Fgfr2,14183:up                                                                                                                                                                                            |
| developmental cell growth                                                | GO:0048588 | 2.72E-03 | 1.53E-02 | Plxnd1,67784:up Wnt5a,22418:down Wisp1,22402:down Sema7a,20361:down Igf1,16000:up Tnfrsf12a,27279:down Crabp2,12904:down Cxcl12,20315:up Postn,50706:down Vegfa,22339:down                                                                                                                                                                                                                                                         |
| positive regulation of intracellular transport                           | GO:0032388 | 2.75E-03 | 1.54E-02 | Tnf,21926:up Gas6,14456:up Ice1,218333:down Egfr,13649:down Bmpr1a,12166:down Ccl2,20296:up Cd4,12504:up Ptgs2,19225:down Grem1,23892:up Igf1,16000:up Bmp4,12159:up Ceacam1,26365:up Sfrp2,20319:up                                                                                                                                                                                                                               |
| muscle system process                                                    | GO:0003012 | 2.75E-03 | 1.54E-02 | Htr2b,15559:down Fxyd1,56188:up Lmcd1,30937:up Sulf1,240725:down Wisp1,22402:down Ptgs2,19225:down Stcl1,20855:up Ednrb,13618:up Igf1,16000:up Vegfb,22340:up Htr2a,15558:down Npnt,114249:up Errfi1,74155:down                                                                                                                                                                                                                    |
| negative regulation of kidney development                                | GO:0090185 | 2.75E-03 | 1.54E-02 | Grem1,23892:up Bmp4,12159:up Adipoq,11450:up                                                                                                                                                                                                                                                                                                                                                                                       |
| regulation of platelet-derived growth factor receptor signaling pathway  | GO:0010640 | 2.75E-03 | 1.54E-02 | Ptgir,19222:up F3,14066:up Adipoq,11450:up                                                                                                                                                                                                                                                                                                                                                                                         |
| fibril organization                                                      | GO:0097435 | 2.75E-03 | 1.54E-02 | Ltbp2,16997:down Col5a1,12831:down Col3a1,12825:down                                                                                                                                                                                                                                                                                                                                                                               |
| negative regulation of cell killing                                      | GO:0031342 | 2.75E-03 | 1.54E-02 | Ceacam1,26365:up Clec2d,93694:up Igf2,16002:up                                                                                                                                                                                                                                                                                                                                                                                     |
| central nervous system development                                       | GO:0007417 | 2.75E-03 | 1.54E-02 | Inhba,16323:down Aldh1a2,19378:up Sema7a,20361:down Uchl5,56207:up Shroom4,208431:down Cxcl12,20315:up Cx3cr1,13051:down Serpine2,20720:up Pparg,19016:up Egfr,13649:down Fgfr1,14182:down Ncam1,17967:down Sfrp1,20377:up Wnt5a,22418:down Bmpr1a,12166:down Bmp4,12159:up Igf1,16000:up Col3a1,12825:down Sfrp2,20319:up Pcdh19,279653:down Aldh1a3,56847:down Ppp3,67916:up Fgfr2,14183:up                                      |
| learning or memory                                                       | GO:0007611 | 2.77E-03 | 1.54E-02 | Plk2,20620:down Glp1r,14652:down Egfr,13649:down Ncam1,17967:down Ptgs2,19225:down Irrn,16181:up Igf1,16000:up Htr2a,15558:down Prkar2b,19088:up Cx3cr1,13051:down Igf2,16002:up                                                                                                                                                                                                                                                   |
| negative regulation of growth                                            | GO:0045926 | 2.77E-03 | 1.54E-02 | Tnf,21926:up Pparg,19016:up Sfrp1,20377:up Wnt5a,22418:down Inhba,16323:down Grem1,23892:up Bmp4,12159:up Sfrp2,20319:up Tgfb2,21808:down Serpine2,20720:up Enpp1,18605:down                                                                                                                                                                                                                                                       |
| cation transport                                                         | GO:0006812 | 2.78E-03 | 1.55E-02 | Htr2b,15559:down Vdr,22337:down Gpm6b,14758:up Cxcl12,20315:up Htr2a,15558:down Serpine2,20720:up Slc40a1,53945:up Gas6,14456:up Glp1r,14652:down Hvcn1,74096:up Fxyd1,56188:up Trf,22041:up Cd4,12504:up Ccl12,20293:up Ptgs2,19225:down Stc1,20855:up Tfrc,22042:up Kcnj15,16516:down Fxyd2,11936:up Ccl4,20303:up Sncg,20618:up Serinc2,230779:down Maob,109731:up Bmp4,12159:up Igf1,16000:up Tgfb2,21808:down S100a1,20193:up |
| regulation of cellular protein localization                              | GO:1903827 | 2.81E-03 | 1.56E-02 | Ice1,218333:down Ccl2,20296:up Gpm6b,14758:up Lrrc15,74488:down Gas6,14456:up Tnf,21926:up Egfr,13649:down C1qtnf3,81799:down Bmpr1a,12166:down Wnt5a,22418:down Ptgs2,19225:down Grem1,23892:up Adipoq,11450:up Bmp4,12159:up Igf1,16000:up Ceacam1,26365:up Sfrp2,20319:up Tgfb2,21808:down                                                                                                                                      |
| ventricular septum morphogenesis                                         | GO:0060412 | 2.83E-03 | 1.57E-02 | Wnt5a,22418:down Tgfb2,21808:down Fgfr2,14183:up Bmp4,12159:up                                                                                                                                                                                                                                                                                                                                                                     |
| regulation of activated T cell proliferation                             | GO:0046006 | 2.83E-03 | 1.57E-02 | Cd24a,12484:down Igf2,16002:up Tnfsf9,21950:up Igf1,16000:up                                                                                                                                                                                                                                                                                                                                                                       |
| neural crest cell migration                                              | GO:0001755 | 2.86E-03 | 1.58E-02 | Htr2b,15559:down Ret,19713:up Ednrb,13618:up Sema7a,20361:down Kitl,17311:up                                                                                                                                                                                                                                                                                                                                                       |
| positive regulation of epithelial cell differentiation                   | GO:0030858 | 2.86E-03 | 1.58E-02 | Vdr,22337:down Sfrp4,20379:up Kitl,17311:up Bmp4,12159:up Adipoq,11450:up                                                                                                                                                                                                                                                                                                                                                          |
| regulation of transforming growth factor beta receptor signaling pathway | GO:0017015 | 2.86E-03 | 1.58E-02 | Htra3,78558:down Chst11,58250:down Tgfb3,21814:up Npnt,114249:up Cd109,235505:down Aspn,66695:down                                                                                                                                                                                                                                                                                                                                 |
| glucose metabolic process                                                | GO:0006006 | 2.87E-03 | 1.59E-02 | Tnf,21926:up Igf1,16000:up Fabp5,16592:up C1qtnf3,81799:down Igf1,16000:up Adipoq,11450:up Igf1,16000:up Igf2,16002:up Enpp1,18605:down                                                                                                                                                                                                                                                                                            |
| negative regulation of cell-cell adhesion                                | GO:0022408 | 2.88E-03 | 1.59E-02 | Cd24a,12484:down Irrn,16181:up Bmp4,12159:up Adipoq,11450:up Ceacam1,26365:up Cxcl12,20315:up Vegfa,22339:down Serpine2,20720:up                                                                                                                                                                                                                                                                                                   |

|                                                                             |            |          |          |                                                                                                                                                                                                                                                                                                                                                                                                                                                                                                                                                                                                                                                                                                                                                                                                                                                                                                                                                                                                                                                                                                                                                                                                                   |
|-----------------------------------------------------------------------------|------------|----------|----------|-------------------------------------------------------------------------------------------------------------------------------------------------------------------------------------------------------------------------------------------------------------------------------------------------------------------------------------------------------------------------------------------------------------------------------------------------------------------------------------------------------------------------------------------------------------------------------------------------------------------------------------------------------------------------------------------------------------------------------------------------------------------------------------------------------------------------------------------------------------------------------------------------------------------------------------------------------------------------------------------------------------------------------------------------------------------------------------------------------------------------------------------------------------------------------------------------------------------|
| regulation of homotypic cell-cell adhesion                                  | GO:0034110 | 2.89E-03 | 1.59E-02 | Cd24a,12484:down Has2,15117:down Ccl2,20296:up Cd4,12504:up Tfrc,22042:up Igf1,16000:up Bmp4,12159:up Ctla2a,13024:down Ceacam1,26365:up Serpine2,20720:up Igf2,16002:up Tnfsf9,21950:up                                                                                                                                                                                                                                                                                                                                                                                                                                                                                                                                                                                                                                                                                                                                                                                                                                                                                                                                                                                                                          |
| regulation of synaptic transmission                                         | GO:0050804 | 2.91E-03 | 1.61E-02 | Tnf,21926:up Plk2,20620:down Lama2,16773:down Egfr,13649:down Ncam1,17967:down Ccl2,20296:up Ptgs2,19225:down Sncg,20618:up Adipoq,11450:up Gpm6b,14758:up Htr2a,15558:down Serpine2,20720:up Cx3cr1,13051:down                                                                                                                                                                                                                                                                                                                                                                                                                                                                                                                                                                                                                                                                                                                                                                                                                                                                                                                                                                                                   |
| female sex differentiation                                                  | GO:0046660 | 2.95E-03 | 1.62E-02 | Sfrp1,20377:up Wnt5a,22418:down Vegfa,22339:down Inhba,16323:down Mmp2,17390:down Kitl,17311:up Bmp4,12159:up                                                                                                                                                                                                                                                                                                                                                                                                                                                                                                                                                                                                                                                                                                                                                                                                                                                                                                                                                                                                                                                                                                     |
| positive regulation of neuron differentiation                               | GO:0045666 | 2.95E-03 | 1.62E-02 | Fgfr1,14182:down Cd24a,12484:down Ptk7,71461:down Wnt5a,22418:down Dpysl3,22240:down Sema7a,20361:down Bmp4,12159:up Ankrd1,107765:down Tnfrsf12a,27279:down Crabp2,12904:down Ret,19713:up Cxcl12,20315:up Vegfa,22339:down Serpine2,20720:up                                                                                                                                                                                                                                                                                                                                                                                                                                                                                                                                                                                                                                                                                                                                                                                                                                                                                                                                                                    |
| macromolecule modification                                                  | GO:0043412 | 2.98E-03 | 1.64E-02 | Igfbp4,16010:up Flrt2,399558:down Sfrp4,20379:up C3,12266:up Gstt1,14871:up Igfbp3,16009:up Cd109,235505:down Loxl2,94352:down Plk2,20620:down Trf,22041:up Cd24a,12484:down Wnt5a,22418:down Mark1,226778:up Iir1,16181:up Adipoq,11450:up Bmp4,12159:up Igf1,16000:up Tgfb2,21808:down Fgfr2,14183:up Htr2b,15559:down Efemp1,216616:up Ccl6,20305:up Aspn,66695:down Saa3,20210:up Fabp4,11770:up Htr2a,15558:down Gas6,14456:up Egfr,13649:down Sfrp1,20377:up C1qtnf3,81799:down Tgfb3,21814:up Ceacam1,26365:up Ccl8,20307:up Sfrp2,20319:up Fam20a,208659:down Npnt,114249:up Tnfrsf11b,18383:up Prkar2b,19088:up Neur13,214854:down Ccl2,20296:up Ccl7,20306:up Ednrb,13618:up Pdgr,54635:down Pdzrn3,55983:down Sema7a,20361:down Uchl5,56207:up Ddah1,69219:down Dok2,13449:up Man2a2,140481:up Mamdc2,71738:down Ccl12,20293:up Bmpr1a,12166:down Ccl4,20303:up Ret,19713:up Vegfb,22340:up Sdf2l1,64136:up Plpp3,67916:up Kitl,17311:up P4ha1,18451:down Ccl9,20308:up Inhba,16323:down Ccl3,20302:up Crfl1,12931:down Vegfa,22339:down Lrrc15,74488:down Igf2,16002:up Nxn,18230:down Tnf,21926:up Fgfr1,14182:down Cd4,12504:up Grem1,23892:up Col3a1,12825:down Errfi1,74155:down Enpp1,18605:down |
| embryo development ending in birth or egg hatching                          | GO:0009792 | 3.00E-03 | 1.65E-02 | Cthrc1,68588:down Adm,11535:up Ptk7,71461:down Gjb5,14622:down Aldh1a2,19378:up Epas1,13819:up Vegfa,22339:down Col11a1,12814:down Egfr,13649:down Fgfr1,14182:down Sfrp1,20377:up Sulf1,240725:down Wnt5a,22418:down Tgfb3,21814:up Bmpr1a,12166:down Bmp4,12159:up Igf1,16000:up Chst11,58250:down Sfrp2,20319:up Tbx15,21384:down Tgfb2,21808:down Fgfr2,14183:up                                                                                                                                                                                                                                                                                                                                                                                                                                                                                                                                                                                                                                                                                                                                                                                                                                              |
| positive regulation of peptidyl-serine phosphorylation                      | GO:0033138 | 3.05E-03 | 1.67E-02 | Tnf,21926:up Gas6,14456:up Sfrp2,20319:up Ret,19713:up Wnt5a,22418:down Vegfa,22339:down                                                                                                                                                                                                                                                                                                                                                                                                                                                                                                                                                                                                                                                                                                                                                                                                                                                                                                                                                                                                                                                                                                                          |
| receptor internalization                                                    | GO:0031623 | 3.05E-03 | 1.67E-02 | Htr2b,15559:down Adm,11535:up Vegfa,22339:down Sfrp4,20379:up Tfrc,22042:up Grem1,23892:up                                                                                                                                                                                                                                                                                                                                                                                                                                                                                                                                                                                                                                                                                                                                                                                                                                                                                                                                                                                                                                                                                                                        |
| cellular response to alcohol                                                | GO:0097306 | 3.05E-03 | 1.67E-02 | Vdr,22337:down Egfr,13649:down Inhba,16323:down Ccl7,20306:up Mmp2,17390:down Bmp4,12159:up                                                                                                                                                                                                                                                                                                                                                                                                                                                                                                                                                                                                                                                                                                                                                                                                                                                                                                                                                                                                                                                                                                                       |
| response to fibroblast growth factor                                        | GO:0071774 | 3.05E-03 | 1.67E-02 | Flrt2,399558:down Fgfr1,14182:down Sfrp1,20377:up Sulf1,240725:down Wnt5a,22418:down Fgfr2,14183:up                                                                                                                                                                                                                                                                                                                                                                                                                                                                                                                                                                                                                                                                                                                                                                                                                                                                                                                                                                                                                                                                                                               |
| regulation of cellular response to transforming growth factor beta stimulus | GO:1903844 | 3.05E-03 | 1.67E-02 | Htra3,78558:down Chst11,58250:down Tgfb3,21814:up Npnt,114249:up Cd109,235505:down Aspn,66695:down                                                                                                                                                                                                                                                                                                                                                                                                                                                                                                                                                                                                                                                                                                                                                                                                                                                                                                                                                                                                                                                                                                                |
| synaptic transmission                                                       | GO:0007268 | 3.08E-03 | 1.68E-02 | Htr2b,15559:down Lama2,16773:down Ccl2,20296:up Plat,18791:down Slc29a1,63959:up Gpm6b,14758:up Htr2a,15558:down Cx3cr1,13051:down Serpine2,20720:up Tnf,21926:up Plk2,20620:down Cd24a,12484:down Egfr,13649:down Ncam1,17967:down Ptgs2,19225:down Sncg,20618:up Adipoq,11450:up Fgfr2,14183:up Sytn1,80976:up                                                                                                                                                                                                                                                                                                                                                                                                                                                                                                                                                                                                                                                                                                                                                                                                                                                                                                  |
| regulation of kidney development                                            | GO:0090183 | 3.10E-03 | 1.69E-02 | Ret,19713:up Vegfa,22339:down Grem1,23892:up Bmp4,12159:up Adipoq,11450:up                                                                                                                                                                                                                                                                                                                                                                                                                                                                                                                                                                                                                                                                                                                                                                                                                                                                                                                                                                                                                                                                                                                                        |
| negative regulation of muscle cell differentiation                          | GO:0051148 | 3.10E-03 | 1.69E-02 | Tnf,21926:up Prl2c2,18811:up Cxcl14,57266:down Ccl9,20308:up Bmp4,12159:up                                                                                                                                                                                                                                                                                                                                                                                                                                                                                                                                                                                                                                                                                                                                                                                                                                                                                                                                                                                                                                                                                                                                        |
| smooth muscle cell differentiation                                          | GO:0051145 | 3.10E-03 | 1.69E-02 | Adm,11535:up Npnt,114249:up Ednrb,13618:up Fgfr2,14183:up Bmp4,12159:up                                                                                                                                                                                                                                                                                                                                                                                                                                                                                                                                                                                                                                                                                                                                                                                                                                                                                                                                                                                                                                                                                                                                           |
| cell adhesion involved in heart morphogenesis                               | GO:0061343 | 3.14E-03 | 1.69E-02 | Flrt2,399558:down Tgfb2,21808:down                                                                                                                                                                                                                                                                                                                                                                                                                                                                                                                                                                                                                                                                                                                                                                                                                                                                                                                                                                                                                                                                                                                                                                                |
| positive regulation of glycogen (starch) synthase activity                  | GO:2000467 | 3.14E-03 | 1.69E-02 | Igf2,16002:up Adipoq,11450:up                                                                                                                                                                                                                                                                                                                                                                                                                                                                                                                                                                                                                                                                                                                                                                                                                                                                                                                                                                                                                                                                                                                                                                                     |
| regulation of bone mineralization involved in bone maturation               | GO:1900157 | 3.14E-03 | 1.69E-02 | Fam101b,76566:down Grem1,23892:up                                                                                                                                                                                                                                                                                                                                                                                                                                                                                                                                                                                                                                                                                                                                                                                                                                                                                                                                                                                                                                                                                                                                                                                 |
| regulation of metanephric glomerulus development                            | GO:0072298 | 3.14E-03 | 1.69E-02 | Ret,19713:up Adipoq,11450:up                                                                                                                                                                                                                                                                                                                                                                                                                                                                                                                                                                                                                                                                                                                                                                                                                                                                                                                                                                                                                                                                                                                                                                                      |
| positive regulation of metanephric glomerulus development                   | GO:0072300 | 3.14E-03 | 1.69E-02 | Ret,19713:up Adipoq,11450:up                                                                                                                                                                                                                                                                                                                                                                                                                                                                                                                                                                                                                                                                                                                                                                                                                                                                                                                                                                                                                                                                                                                                                                                      |
| regulation of ovulation                                                     | GO:0060278 | 3.14E-03 | 1.69E-02 | Inhba,16323:down Plat,18791:down                                                                                                                                                                                                                                                                                                                                                                                                                                                                                                                                                                                                                                                                                                                                                                                                                                                                                                                                                                                                                                                                                                                                                                                  |
| positive regulation of peptidyl-tyrosine autophosphorylation                | GO:1900086 | 3.14E-03 | 1.69E-02 | Vegfa,22339:down Grem1,23892:up                                                                                                                                                                                                                                                                                                                                                                                                                                                                                                                                                                                                                                                                                                                                                                                                                                                                                                                                                                                                                                                                                                                                                                                   |
| detoxification of inorganic compound                                        | GO:0061687 | 3.14E-03 | 1.69E-02 | Mt2,17750:up Mt1,17748:up                                                                                                                                                                                                                                                                                                                                                                                                                                                                                                                                                                                                                                                                                                                                                                                                                                                                                                                                                                                                                                                                                                                                                                                         |
| midgut development                                                          | GO:0007494 | 3.14E-03 | 1.69E-02 | Wnt5a,22418:down Ednrb,13618:up                                                                                                                                                                                                                                                                                                                                                                                                                                                                                                                                                                                                                                                                                                                                                                                                                                                                                                                                                                                                                                                                                                                                                                                   |

|                                                               |            |          |          |                                                                                                                                                                                                                                                                                                                                                                                                                                                                                                                                                                                                                                                                                                                                                                                                                       |
|---------------------------------------------------------------|------------|----------|----------|-----------------------------------------------------------------------------------------------------------------------------------------------------------------------------------------------------------------------------------------------------------------------------------------------------------------------------------------------------------------------------------------------------------------------------------------------------------------------------------------------------------------------------------------------------------------------------------------------------------------------------------------------------------------------------------------------------------------------------------------------------------------------------------------------------------------------|
| positive regulation of apoptotic cell clearance               | GO:2000427 | 3.14E-03 | 1.69E-02 | Ccl2,20296:up C3,12266:up                                                                                                                                                                                                                                                                                                                                                                                                                                                                                                                                                                                                                                                                                                                                                                                             |
| regulation of dendritic cell differentiation                  | GO:2001198 | 3.14E-03 | 1.69E-02 | Tmem176a,66058:up Tmem176b,65963:up                                                                                                                                                                                                                                                                                                                                                                                                                                                                                                                                                                                                                                                                                                                                                                                   |
| stress-activated MAPK cascade                                 | GO:0051403 | 3.15E-03 | 1.70E-02 | Tnf,21926:up Trf,22041:up Sfrp1,20377:up Wnt5a,22418:down Sfrp4,20379:up Il1rn,16181:up Ceacam1,26365:up Sfrp2,20319:up Vegfa,22339:down Tgfb2,21808:down                                                                                                                                                                                                                                                                                                                                                                                                                                                                                                                                                                                                                                                             |
| positive regulation of synaptic transmission                  | GO:0050806 | 3.16E-03 | 1.70E-02 | Tnf,21926:up Plk2,20620:down Lama2,16773:down Egfr,13649:down Ccl2,20296:up Ptgs2,19225:down Serpine2,20720:up Cx3cr1,13051:down                                                                                                                                                                                                                                                                                                                                                                                                                                                                                                                                                                                                                                                                                      |
| regulation of axon extension involved in axon guidance        | GO:0048841 | 3.16E-03 | 1.70E-02 | Plxnd1,67784:up Cxcl12,20315:up Wnt5a,22418:down Vegfa,22339:down                                                                                                                                                                                                                                                                                                                                                                                                                                                                                                                                                                                                                                                                                                                                                     |
| positive regulation of phospholipase activity                 | GO:0010518 | 3.16E-03 | 1.70E-02 | Htr2b,15559:down Fgfr1,14182:down Htr2a,15558:down Fgfr2,14183:up                                                                                                                                                                                                                                                                                                                                                                                                                                                                                                                                                                                                                                                                                                                                                     |
| positive regulation of nitrogen compound metabolic process    | GO:0051173 | 3.21E-03 | 1.72E-02 | Fstl3,83554:down Ic1,218333:down Adm,11535:up Pdgfc,54635:down Epas1,13819:up Ddah1,69219:down Lyl1,17095:up Sdpr,20324:down Gfip3,16009:up Trf,22041:up Ptx3,19288:up Wnt5a,22418:down Bmpr1a,12166:down Maob,109731:up Bmp4,12159:up Gf1,16000:up Ret,19713:up Ppp3,67916:up Ptgir,19222:up Creb3l1,26427:down Fgfr2,14183:up Kitl,17311:up Pri2c2,18811:up Inhba,16323:down Ras11a,68895:up Ccl3,20302:up Vdr,22337:down Vegfa,22339:down Htr2a,15558:down Gf2,16002:up Slc40a1,53945:up Pparg,19016:up Tnf,21926:up Glp1r,14652:down Egfr,13649:down Fgfr1,14182:down Sfrp1,20377:up Has2,15117:down Tgfb3,21814:up Ptgs2,19225:down Tfrc,22042:up Grem1,23892:up Sfrp2,20319:up Npnt,114249:up                                                                                                                   |
| reactive oxygen species biosynthetic process                  | GO:1903409 | 3.25E-03 | 1.74E-02 | Tnf,21926:up Ptx3,19288:up Ddah1,69219:down Egfr,13649:down Ptgs2,19225:down Gf1,16000:up                                                                                                                                                                                                                                                                                                                                                                                                                                                                                                                                                                                                                                                                                                                             |
| response to estrogen                                          | GO:0043627 | 3.25E-03 | 1.74E-02 | Egfr,13649:down Cd24a,12484:down Sfrp1,20377:up Hmox1,15368:up Tgfb2,21808:down Mmp2,17390:down                                                                                                                                                                                                                                                                                                                                                                                                                                                                                                                                                                                                                                                                                                                       |
| positive regulation of GTPase activity                        | GO:0043547 | 3.25E-03 | 1.74E-02 | Ccl9,20308:up Ccl6,20305:up Wnt5a,22418:down Ccl7,20306:up Ccl2,20296:up Ccl12,20293:up Ccl4,20303:up Ccl3,20302:up Ccl8,20307:up                                                                                                                                                                                                                                                                                                                                                                                                                                                                                                                                                                                                                                                                                     |
| phosphate ion transport                                       | GO:0006817 | 3.29E-03 | 1.75E-02 | Ank,11732:down Fgfr1,14182:down Sfrp4,20379:up                                                                                                                                                                                                                                                                                                                                                                                                                                                                                                                                                                                                                                                                                                                                                                        |
| ossification involved in bone maturation                      | GO:0043931 | 3.29E-03 | 1.75E-02 | Fam101b,76566:down Grem1,23892:up Gf1,16000:up                                                                                                                                                                                                                                                                                                                                                                                                                                                                                                                                                                                                                                                                                                                                                                        |
| bone maturation                                               | GO:0070977 | 3.29E-03 | 1.75E-02 | Fam101b,76566:down Grem1,23892:up Gf1,16000:up                                                                                                                                                                                                                                                                                                                                                                                                                                                                                                                                                                                                                                                                                                                                                                        |
| activation of protein kinase B activity                       | GO:0032148 | 3.29E-03 | 1.75E-02 | Gas6,14456:up Wnt5a,22418:down Gf1,16000:up                                                                                                                                                                                                                                                                                                                                                                                                                                                                                                                                                                                                                                                                                                                                                                           |
| response to cadmium ion                                       | GO:0046686 | 3.29E-03 | 1.75E-02 | Sord,20322:up Akr1c18,105349:up Hmox1,15368:up                                                                                                                                                                                                                                                                                                                                                                                                                                                                                                                                                                                                                                                                                                                                                                        |
| regulation of pathway-restricted SMAD protein phosphorylation | GO:0060393 | 3.35E-03 | 1.78E-02 | Tgfb2,21808:down Inhba,16323:down Bmpr1a,12166:down Grem1,23892:up Bmp4,12159:up                                                                                                                                                                                                                                                                                                                                                                                                                                                                                                                                                                                                                                                                                                                                      |
| positive regulation of fibroblast proliferation               | GO:0048146 | 3.35E-03 | 1.78E-02 | Gas6,14456:up Egfr,13649:down Wnt5a,22418:down Pdgfc,54635:down Gf1,16000:up                                                                                                                                                                                                                                                                                                                                                                                                                                                                                                                                                                                                                                                                                                                                          |
| negative regulation of macromolecule metabolic process        | GO:0010605 | 3.38E-03 | 1.80E-02 | Frt2,399558:down Sfrp4,20379:up Ednrb,13618:up Cst7,13011:up Epas1,13819:up Ankrd1,107765:down Gfip3,16009:up Cd109,235505:down Loxl2,94352:down Loxl3,16950:down Ptx3,19288:up Wnt5a,22418:down Ccl4,20303:up Adipoq,11450:up Bmp4,12159:up Gf1,16000:up Prg4,96875:down Tgfb2,21808:down Ppp3,67916:up Fgfr2,14183:up Kng1,16644:up Slpi,20568:up Aspn,66695:down Plat,18791:down Tfpi2,1789:down Vdr,22337:down Ctla2a,13024:down Fabp4,11770:up Vegfa,22339:down Serpine2,20720:up Lrrc15,74488:down Nxn,18230:down Pparg,19016:up Gas6,14456:up Tnf,21926:up Lmcd1,30937:up Fgfr1,14182:down Egfr,13649:down Hmox1,15368:up Sfrp1,20377:up Tgfb3,21814:up Grem1,23892:up Ceacam1,26365:up Sfrp2,20319:up Serpinc1,12258:up Serpina3g,20715:up Prkar2b,19088:up Erff1,74155:down Enpp1,18605:down S100a1,20193:up |
| positive regulation of biosynthetic process                   | GO:0009891 | 3.40E-03 | 1.81E-02 | Fstl3,83554:down Ic1,218333:down Adm,11535:up Ccl2,20296:up Pdgfc,54635:down Epas1,13819:up Ddah1,69219:down Lyl1,17095:up Sdpr,20324:down Trf,22041:up Ptx3,19288:up Wnt5a,22418:down Bmpr1a,12166:down Bmp4,12159:up Gf1,16000:up Ret,19713:up Tgfb2,21808:down Ppp3,67916:up Ptgir,19222:up Creb3l1,26427:down Fgfr2,14183:up Kitl,17311:up Pri2c2,18811:up Htr2b,15559:down Inhba,16323:down Ras11a,68895:up Ccl3,20302:up Vdr,22337:down Vegfa,22339:down Htr2a,15558:down Gf2,16002:up Slc40a1,53945:up Pparg,19016:up Tnf,21926:up Glp1r,14652:down Egfr,13649:down Fgfr1,14182:down Sfrp1,20377:up Has2,15117:down Tgfb3,21814:up Ptgs2,19225:down Grem1,23892:up Sfrp2,20319:up Npnt,114249:up                                                                                                               |
| monocarboxylic acid metabolic process                         | GO:0032787 | 3.42E-03 | 1.81E-02 | P4ha1,18451:down Hpgd,15446:up Aldh1a2,19378:up C3,12266:up Fabp4,11770:up Fam132b,227358:down Htr2a,15558:down Cdo1,12583:up Pparg,19016:up Ggt5,23887:up Akr1c18,105349:up Lpl,16956:up Ptgs2,19225:down Adipoq,11450:up Gf1,16000:up Crabp2,12904:down Aldh1a3,56847:down Prkar2b,19088:up                                                                                                                                                                                                                                                                                                                                                                                                                                                                                                                         |
| cell morphogenesis involved in differentiation                | GO:000904  | 3.42E-03 | 1.81E-02 | Fstl3,83554:down Ic1,218333:down Adm,11535:up Ccl2,20296:up Pdgfc,54635:down Epas1,13819:up Ddah1,69219:down Lyl1,17095:up Sdpr,20324:down Trf,22041:up Ptx3,19288:up Wnt5a,22418:down Bmpr1a,12166:down Bmp4,12159:up Gf1,16000:up Ret,19713:up Tgfb2,21808:down Ppp3,67916:up Ptgir,19222:up Creb3l1,26427:down Fgfr2,14183:up Kitl,17311:up Pri2c2,18811:up Htr2b,15559:down Inhba,16323:down Ras11a,68895:up Ccl3,20302:up Vdr,22337:down Vegfa,22339:down Htr2a,15558:down Gf2,16002:up Slc40a1,53945:up Pparg,19016:up Tnf,21926:up Glp1r,14652:down Egfr,13649:down Fgfr1,14182:down Sfrp1,20377:up Has2,15117:down Tgfb3,21814:up Ptgs2,19225:down Grem1,23892:up Sfrp2,20319:up Npnt,114249:up                                                                                                               |
| positive regulation of cellular protein localization          | GO:1903829 | 3.46E-03 | 1.83E-02 | Tnf,21926:up Gas6,14456:up Ic1,218333:down Egfr,13649:down Bmpr1a,12166:down Ccl2,20296:up Ptgs2,19225:down Grem1,23892:up Gf1,16000:up Bmp4,12159:up Ceacam1,26365:up Sfrp2,20319:up Tgfb2,21808:down                                                                                                                                                                                                                                                                                                                                                                                                                                                                                                                                                                                                                |
| I-kappaB kinase/NF-kappaB signaling                           | GO:0007249 | 3.51E-03 | 1.85E-02 | Tnf,21926:up Plk2,20620:down Hmox1,15368:up C1qtnf3,81799:down Ptgs2,19225:down Grem1,23892:up Saa3,20210:up Adipoq,11450:up Clec4n,56620:up Il1r1,17082:down                                                                                                                                                                                                                                                                                                                                                                                                                                                                                                                                                                                                                                                         |
| regulation of organ formation                                 | GO:0003156 | 3.52E-03 | 1.85E-02 | Fgfr1,14182:down Sulf1,240725:down Wnt5a,22418:down Bmp4,12159:up                                                                                                                                                                                                                                                                                                                                                                                                                                                                                                                                                                                                                                                                                                                                                     |
| negative regulation of response to cytokine stimulus          | GO:0060761 | 3.52E-03 | 1.85E-02 | Pparg,19016:up Gas6,14456:up Il1rn,16181:up Adipoq,11450:up                                                                                                                                                                                                                                                                                                                                                                                                                                                                                                                                                                                                                                                                                                                                                           |

|                                                       |            |          |          |                                                                                                                                                                                                                                                                                                                      |
|-------------------------------------------------------|------------|----------|----------|----------------------------------------------------------------------------------------------------------------------------------------------------------------------------------------------------------------------------------------------------------------------------------------------------------------------|
| regulation of neuroblast proliferation                | GO:1902692 | 3.52E-03 | 1.85E-02 | Prl2c2,18811:up Cd24a,12484:down Vegfa,22339:down Cx3cr1,13051:down                                                                                                                                                                                                                                                  |
| regulation of proteolysis                             | GO:0030162 | 3.58E-03 | 1.88E-02 | Kng1,16644:up C3,12266:up Slpi,20568:up Cst7,13011:up Plat,18791:down Tfpi2,21789:down Ctla2a,13024:down Uchl5,56207:up Vegfa,22339:down Serpine2,20720:up Cd109,235505:down Gas6,14456:up Pparg,19016:up Tnf,21926:up Plk2,20620:down Igf1,16000:up Sfrp2,20319:up Serping1,12258:up Serpina3g,20715:up F3,14066:up |
| regulation of T cell proliferation                    | GO:0042129 | 3.61E-03 | 1.90E-02 | Cd24a,12484:down Cd4,12504:up Tfrc,22042:up Igf1,16000:up Bmp4,12159:up Ceacam1,26365:up Igf2,16002:up Tnfsf9,21950:up                                                                                                                                                                                               |
| response to temperature stimulus                      | GO:0009266 | 3.63E-03 | 1.91E-02 | Htr2b,15559:down Tfec,21426:up Hmox1,15368:up Htr2a,15558:down Hspb7,29818:up Ccl2,20296:up Igf1,16000:up                                                                                                                                                                                                            |
| regulation of lymphocyte mediated immunity            | GO:0002706 | 3.63E-03 | 1.91E-02 | Ceacam1,26365:up Tnf,21926:up Clec2d,93694:up Cd24a,12484:down C3,12266:up Tfrc,22042:up Igf2,16002:up                                                                                                                                                                                                               |
| T cell proliferation                                  | GO:0042098 | 3.65E-03 | 1.92E-02 | Cd24a,12484:down Cd4,12504:up Tfrc,22042:up Igf1,16000:up Bmp4,12159:up Ceacam1,26365:up Cxcl12,20315:up Igf2,16002:up Tnfsf9,21950:up                                                                                                                                                                               |
| positive regulation of cytoplasmic transport          | GO:1903651 | 3.72E-03 | 1.95E-02 | Tnf,21926:up Gas6,14456:up Egfr,13649:down Bmpr1a,12166:down Cd4,12504:up Ptgs2,19225:down Grem1,23892:up Igf1,16000:up Bmp4,12159:up Ceacam1,26365:up Sfrp2,20319:up                                                                                                                                                |
| Wnt signaling pathway                                 | GO:0016055 | 3.74E-03 | 1.96E-02 | Cthrc1,68588:down Sfrp1,20377:up Sulf1,240725:down Ptk7,71461:down Wnt5a,22418:down Sfrp4,20379:up Wisp1,22402:down Mark1,226778:up Grem1,23892:up Sfrp2,20319:up Rspo2,239405:up Ppp3,67916:up Nxn,18230:down Fgfr2,14183:up                                                                                        |
| negative regulation of secretion                      | GO:0051048 | 3.77E-03 | 1.97E-02 | Tnf,21926:up Pparg,19016:up Gas6,14456:up Sfrp1,20377:up Hmox1,15368:up C1qtnf3,81799:down Il1rn,16181:up Maob,109731:up Adipoq,11450:up Anep,16790:up                                                                                                                                                               |
| receptor-mediated endocytosis                         | GO:0006898 | 3.80E-03 | 1.98E-02 | Htr2b,15559:down Trf,22041:up Adm,11535:up Cd24a,12484:down Mrc1,17533:up Sfrp4,20379:up Tfrc,22042:up Grem1,23892:up Vegfa,22339:down                                                                                                                                                                               |
| regulation of interleukin-6 production                | GO:0032675 | 3.82E-03 | 1.99E-02 | Tnf,21926:up Gas6,14456:up Prg4,96875:down C1qtnf3,81799:down Wnt5a,22418:down Figf,14205:up Tnfsf9,21950:up                                                                                                                                                                                                         |
| regulation of anatomical structure size               | GO:0090066 | 3.86E-03 | 2.00E-02 | Htr2b,15559:down Kng1,16644:up Adm,11535:up Plxnd1,67784:up Ednrb,13618:up Sema7a,20361:down Tnfrsf12a,27279:down Cxcl12,20315:up Vegfa,22339:down Htr2a,15558:down Mmp2,17390:down Egfr,13649:down Tgfb2,21808:up Wnt5a,22418:down Ptgs2,19225:down Crabp2,12904:down Ret,19713:up                                  |
| ovulation                                             | GO:0030728 | 3.90E-03 | 2.00E-02 | Inhba,16323:down Ptgs2,19225:down Plat,18791:down                                                                                                                                                                                                                                                                    |
| response to interferon-alpha                          | GO:0035455 | 3.90E-03 | 2.00E-02 | Gas6,14456:up Iffit1,15957:up Iffit3,15959:up                                                                                                                                                                                                                                                                        |
| positive regulation of protein autophosphorylation    | GO:0031954 | 3.90E-03 | 2.00E-02 | Vegfa,22339:down Pdgfc,54635:down Grem1,23892:up                                                                                                                                                                                                                                                                     |
| regulation of monocyte chemotaxis                     | GO:0090025 | 3.90E-03 | 2.00E-02 | Cxcl12,20315:up Ccl2,20296:up Grem1,23892:up                                                                                                                                                                                                                                                                         |
| protein heterotrimerization                           | GO:0070208 | 3.90E-03 | 2.00E-02 | Col1a2,12843:down C1qtnf6,72709:down Adipoq,11450:up                                                                                                                                                                                                                                                                 |
| regulation of heterotypic cell-cell adhesion          | GO:0034114 | 3.90E-03 | 2.00E-02 | Tnf,21926:up Il1rn,16181:up Adipoq,11450:up                                                                                                                                                                                                                                                                          |
| negative regulation of smooth muscle cell migration   | GO:0014912 | 3.90E-03 | 2.00E-02 | Bmpr1a,12166:down Igf1,16000:up Adipoq,11450:up                                                                                                                                                                                                                                                                      |
| positive regulation of epidermal cell differentiation | GO:0045606 | 3.90E-03 | 2.00E-02 | Vdr,22337:down Sfrp4,20379:up Bmp4,12159:up                                                                                                                                                                                                                                                                          |
| ovarian follicle development                          | GO:0010154 | 3.90E-03 | 2.00E-02 | Vegfa,22339:down Inhba,16323:down Mmp2,17390:down Kitl,17311:up Bmp4,12159:up                                                                                                                                                                                                                                        |
| morphogenesis of a polarized epithelium               | GO:0001738 | 3.90E-03 | 2.00E-02 | Cthrc1,68588:down Sfrp2,20319:up Sfrp1,20377:up Ptk7,71461:down Wnt5a,22418:down                                                                                                                                                                                                                                     |
| regulation of lymphocyte apoptotic process            | GO:0070228 | 3.90E-03 | 2.00E-02 | Ceacam1,26365:up Cd24a,12484:down Wnt5a,22418:down Tgfb2,21808:down Bmp4,12159:up                                                                                                                                                                                                                                    |
| regulation of collagen metabolic process              | GO:0010712 | 3.90E-03 | 2.00E-02 | Pparg,19016:up Ccl2,20296:up Errfi1,74155:down Bmp4,12159:up                                                                                                                                                                                                                                                         |
| regulation of T cell apoptotic process                | GO:0070232 | 3.90E-03 | 2.00E-02 | Ceacam1,26365:up Wnt5a,22418:down Tgfb2,21808:down Bmp4,12159:up                                                                                                                                                                                                                                                     |
| regulation of polysaccharide metabolic process        | GO:0032881 | 3.90E-03 | 2.00E-02 | Has2,15117:down Enpp1,18605:down Igf2,16002:up Igf1,16000:up                                                                                                                                                                                                                                                         |
| metanephric nephron development                       | GO:0072210 | 3.90E-03 | 2.00E-02 | Ret,19713:up Grem1,23892:up Bmp4,12159:up Adipoq,11450:up                                                                                                                                                                                                                                                            |
| regulation of DNA replication                         | GO:0006275 | 3.94E-03 | 2.02E-02 | Pparg,19016:up Fgfr1,14182:down Egfr,13649:down Pdgfc,54635:down Grem1,23892:up Igf1,16000:up Bmp4,12159:up Kitl,17311:up                                                                                                                                                                                            |
| neural tube formation                                 | GO:0001841 | 4.02E-03 | 2.06E-02 | Cthrc1,68588:down Sfrp2,20319:up Adm,11535:up Sfrp1,20377:up Ptk7,71461:down Wnt5a,22418:down Bmp4,12159:up                                                                                                                                                                                                          |

|                                                 |            |          |          |                                                                                                                                                                                                                                                                                                                                                                                                                                                                                                                                                                                                                                                                                                                                                                                                                                                                                                                                                                                                                                                                                                                                                                                                                                                                                                                                                                                                                                                                                                                                                                                                                                                                                                                                                                                                                                                                       |
|-------------------------------------------------|------------|----------|----------|-----------------------------------------------------------------------------------------------------------------------------------------------------------------------------------------------------------------------------------------------------------------------------------------------------------------------------------------------------------------------------------------------------------------------------------------------------------------------------------------------------------------------------------------------------------------------------------------------------------------------------------------------------------------------------------------------------------------------------------------------------------------------------------------------------------------------------------------------------------------------------------------------------------------------------------------------------------------------------------------------------------------------------------------------------------------------------------------------------------------------------------------------------------------------------------------------------------------------------------------------------------------------------------------------------------------------------------------------------------------------------------------------------------------------------------------------------------------------------------------------------------------------------------------------------------------------------------------------------------------------------------------------------------------------------------------------------------------------------------------------------------------------------------------------------------------------------------------------------------------------|
| regulation of macromolecule metabolic process   | GO:0060255 | 4.05E-03 | 2.07E-02 | Fstl3,83554:down lgfbp4,16010:up Flrt2,399558:down Tfec,21426:up Sfrp4,20379:up C3,12266:up Ankrd1,107765:down Lyl1,17095:up lgfbp3,16009:up Cd109,235505:down Loxl2,94352:down Plk2,20620:down Loxl3,16950:down Trf,22041:up Cd24a,12484:down Wnt5a,22418:down  l1rn,16181:up Adipoq,11450:up Bmp4,12159:up lgf1,16000:up Tgfb2,21808:down F3,14066:up Fgfr2,14183:up Htr2b,15559:down Kng1,16644:up Prl2c2,18811:up Efemp1,216616:up Ccl6,20305:up Sipi,20568:up Aspn,66695:down Vdr,22337:down Fabp4,11770:up Htr2a,15558:down Oas3,246727:up Slc40a1,53945:up Gas6,14456:up Egfr,13649:down Sfrp1,20377:up C1qtnf3,81799:down Tgfb3,21814:up Tfrc,22042:up Ceacam1,26365:up Ccl8,20307:up Sfrp2,20319:up Serpina3g,20715:up Fam20a,208659:down Npnt,114249:up Tnfrsf11b,18383:up Pkrar2b,19088:up S100a1,20193:up lce1,218333:down Aldh1a2,19378:up Ccl2,20296:up Ccl7,20306:up Pd gfc,54635:down Cst7,13011:up Ednrb,13618:up Sema7a,20361:down Epas1,13819:up Htra3,78558:down Uchl5,56207:up Sdpr,20324:down Ptx3,19288:up Ccl12,20293:up Bmpr1a,12166:down Ccl4,20303:up Tnc,21923:down Ret,19713:up Prg4,96875:down Plpp3,67916:up Creb3l1,26427:down Kitl,17311:up Ccl9,20308:up Inhba,16323:down Ras11a,68895:up Bnc2,242509:down Plat,18791:down Ccl3,20302:up Tfpi2,21789:down Ctla2a,13024:down Crlf1,12931:down Vegfa,22339:down Serpine2,20720:up Lrrc15,74488:down Nxn,18230:down lgf2,16002:up Pparg,19016:up Tnf,21926:up Glp1r,14652:down Lmcd1,30937:up Fgfr1,14182:down Has2,15117:down Hmox1,15368:up Sulf1,240725:down Cd4,12504:up Grem1,23892:up Phf11d,219132:up Tbx15,21384:down Serpinc1,12258:up Errfi1,74155:down Enpp1,18605:down                                                                                                                                                                                                     |
| single-organism biosynthetic process            | GO:0044711 | 4.09E-03 | 2.09E-02 | Adm,11535:up Ccl2,20296:up Aldh1a2,19378:up C3,12266:up Ampd3,11717:up Serpinh1,12406:down Sord,20322:up Cdo1,12583:up Ggt5,23887:up Akr1c18,105349:up Fabp5,16592:up Wnt5a,22418:down Adipoq,11450:up Bmp4,12159:up lgf1,16000:up Chst11,58250:down Gatm,67092:down Pdxk,216134:up Aldh1a3,56847:down Ptgir,19222:up Htr2b,15559:down Vdr,22337:down Htr2a,15558:down lgf2,16002:up Tnf,21926:up Pparg,19016:up Fgfr1,14182:down Lpl,16956:up Has2,15117:down C1qtnf3,81799:down Ptgs2,19225:down Ceacam1,26365:up Col5a1,12831:down Uck2,80914:down Errfi1,74155:down Enpp1,18605:down                                                                                                                                                                                                                                                                                                                                                                                                                                                                                                                                                                                                                                                                                                                                                                                                                                                                                                                                                                                                                                                                                                                                                                                                                                                                              |
| homotypic cell-cell adhesion                    | GO:0034109 | 4.12E-03 | 2.11E-02 | Ly9,17085:up Ccl2,20296:up Ctla2a,13024:down Cxcl12,20315:up Serpine2,20720:up lgf2,16002:up Cd24a,12484:down Ncam1,17967:down Has2,15117:down Cd4,12504:up Tfrc,22042:up Bmp4,12159:up lgf1,16000:up Ceacam1,26365:up Plpp3,67916:up Tnfsf9,21950:up Clec4e,56619:up                                                                                                                                                                                                                                                                                                                                                                                                                                                                                                                                                                                                                                                                                                                                                                                                                                                                                                                                                                                                                                                                                                                                                                                                                                                                                                                                                                                                                                                                                                                                                                                                 |
| ovulation cycle                                 | GO:0042698 | 4.14E-03 | 2.11E-02 | Egfr,13649:down Vegfa,22339:down Inhba,16323:down Mmp2,17390:down Kitl,17311:up Bmp4,12159:up                                                                                                                                                                                                                                                                                                                                                                                                                                                                                                                                                                                                                                                                                                                                                                                                                                                                                                                                                                                                                                                                                                                                                                                                                                                                                                                                                                                                                                                                                                                                                                                                                                                                                                                                                                         |
| regulation of lipid metabolic process           | GO:0019216 | 4.14E-03 | 2.11E-02 | Htr2b,15559:down Tnf,21926:up Pparg,19016:up Akr1c18,105349:up C3,12266:up lgf1,16000:up Adipoq,11450:up Vdr,22337:down Ceacam1,26365:up Fam132b,227358:down Htr2a,15558:down lgf2,16002:up                                                                                                                                                                                                                                                                                                                                                                                                                                                                                                                                                                                                                                                                                                                                                                                                                                                                                                                                                                                                                                                                                                                                                                                                                                                                                                                                                                                                                                                                                                                                                                                                                                                                           |
| regulation of neuron differentiation            | GO:0045664 | 4.18E-03 | 2.13E-02 | Efemp1,216616:up Plxnd1,67784:up Ptk7,71461:down Dpysl3,22240:down Ednrb,13618:up Sema7a,20361:down Ankrd1,107765:down Tnfrsf12a,27279:down Cxcl12,20315:up Vegfa,22339:down Serpine2,20720:up Plk2,20620:down Cd24a,12484:down Fgfr1,14182:down Sfrp1,20377:up Wnt5a,22418:down Bmp4,12159:up Sfrp2,20319:up Crabp2,12904:down Ret,19713:up                                                                                                                                                                                                                                                                                                                                                                                                                                                                                                                                                                                                                                                                                                                                                                                                                                                                                                                                                                                                                                                                                                                                                                                                                                                                                                                                                                                                                                                                                                                          |
| cardiac septum morphogenesis                    | GO:0060411 | 4.20E-03 | 2.14E-02 | Wnt5a,22418:down Tgfb2,21808:down Bmpr1a,12166:down Fgfr2,14183:up Bmp4,12159:up                                                                                                                                                                                                                                                                                                                                                                                                                                                                                                                                                                                                                                                                                                                                                                                                                                                                                                                                                                                                                                                                                                                                                                                                                                                                                                                                                                                                                                                                                                                                                                                                                                                                                                                                                                                      |
| regulation of metabolic process                 | GO:0019222 | 4.21E-03 | 2.14E-02 | Fstl3,83554:down lgfbp4,16010:up Adm,11535:up Flrt2,399558:down Tfec,21426:up Sfrp4,20379:up C3,12266:up Ankrd1,107765:down Lyl1,17095:up lgfbp3,16009:up Cd109,235505:down Loxl2,94352:down Plk2,20620:down Loxl3,16950:down Trf,22041:up Cd24a,12484:down Wnt5a,22418:down  l1rn,16181:up Maob,109731:up Adipoq,11450:up Bmp4,12159:up lgf1,16000:up Tgfb2,21808:down Ptgir,19222:up F3,14066:up Fgfr2,14183:up Htr2b,15559:down Kng1,16644:up Prl2c2,18811:up Dram1,71712:up Efemp1,216616:up Ccl6,20305:up Sipi,20568:up Aspn,66695:down Vdr,22337:down Fabp4,11770:up Fam132b,227358:down Htr2a,15558:down Oas3,246727:up Slc40a1,53945:up Gas6,14456:up Egfr,13649:down Sfrp1,20377:up C1qtnf3,81799:down Tgfb3,21814:up Tfrc,22042:up Serinc2,230779:down Ceacam1,26365:up Ccl8,20307:up Sfrp2,20319:up Serpina3g,20715:up Fam20a,208659:down Npnt,114249:up Tnfrsf11b,18383:up Pkrar2b,19088:up S100a1,20193:up lce1,218333:down Aldh1a2,19378:up Ccl2,20296:up Ccl7,20306:up Pd gfc,54635:down Cst7,13011:up Ednrb,13618:up Sema7a,20361:down Epas1,13819:up Htra3,78558:down Uchl5,56207:up Ddah1,69219:down Sdpr,20324:down Ptx3,19288:up Akr1c18,105349:up Bmpr1a,12166:down Ccl12,20293:up Ccl4,20303:up Tnc,21923:down Ret,19713:up Prg4,96875:down Plpp3,67916:up Creb3l1,26427:down Kitl,17311:up Hp,15439:up Ccl9,20308:up Inhba,16323:down Ras11a,68895:up Bnc2,242509:down Plat,18791:down Ccl3,20302:up Tfpi2,21789:down Ctla2a,13024:down Srxp2,68792:down Crlf1,12931:down Plod2,26432:down Vegfa,22339:down Serpine2,20720:up Lrrc15,74488:down Nxn,18230:down lgf2,16002:up Pparg,19016:up Tnf,21926:up Glp1r,14652:down Lmcd1,30937:up Fgfr1,14182:down Has2,15117:down Hmox1,15368:up Sulf1,240725:down Cd4,12504:up Ptgs2,19225:down Grem1,23892:up Phf11d,219132:up Tbx15,21384:down Serpinc1,12258:up Errfi1,74155:down Enpp1,18605:down |
| response to mechanical stimulus                 | GO:0009612 | 4.22E-03 | 2.14E-02 | Ankrd1,107765:down Tnf,21926:up Col11a1,12814:down Htr2a,15558:down Mmp2,17390:down Serpine2,20720:up lgf1,16000:up                                                                                                                                                                                                                                                                                                                                                                                                                                                                                                                                                                                                                                                                                                                                                                                                                                                                                                                                                                                                                                                                                                                                                                                                                                                                                                                                                                                                                                                                                                                                                                                                                                                                                                                                                   |
| kidney development                              | GO:0001822 | 4.23E-03 | 2.14E-02 | Fgfr1,14182:down Sfrp1,20377:up Sulf1,240725:down Grem1,23892:up Bmp4,12159:up Adipoq,11450:up Crlf1,12931:down Ret,19713:up Vegfa,22339:down Npnt,114249:up Fgfr2,14183:up                                                                                                                                                                                                                                                                                                                                                                                                                                                                                                                                                                                                                                                                                                                                                                                                                                                                                                                                                                                                                                                                                                                                                                                                                                                                                                                                                                                                                                                                                                                                                                                                                                                                                           |
| regulation of JNK cascade                       | GO:0046328 | 4.30E-03 | 2.18E-02 | Tnf,21926:up Trf,22041:up Sfrp1,20377:up Wnt5a,22418:down Sfrp4,20379:up  l1rn,16181:up Ceacam1,26365:up Sfrp2,20319:up                                                                                                                                                                                                                                                                                                                                                                                                                                                                                                                                                                                                                                                                                                                                                                                                                                                                                                                                                                                                                                                                                                                                                                                                                                                                                                                                                                                                                                                                                                                                                                                                                                                                                                                                               |
| stem cell division                              | GO:0017145 | 4.32E-03 | 2.18E-02 | Sfrp2,20319:up Fgfr1,14182:down Tgfb2,21808:down Fgfr2,14183:up                                                                                                                                                                                                                                                                                                                                                                                                                                                                                                                                                                                                                                                                                                                                                                                                                                                                                                                                                                                                                                                                                                                                                                                                                                                                                                                                                                                                                                                                                                                                                                                                                                                                                                                                                                                                       |
| regulation of cardiac muscle cell proliferation | GO:0060043 | 4.32E-03 | 2.18E-02 | Fgfr1,14182:down Ncam1,17967:down Bmpr1a,12166:down Fgfr2,14183:up                                                                                                                                                                                                                                                                                                                                                                                                                                                                                                                                                                                                                                                                                                                                                                                                                                                                                                                                                                                                                                                                                                                                                                                                                                                                                                                                                                                                                                                                                                                                                                                                                                                                                                                                                                                                    |
| regulation of axon guidance                     | GO:1902667 | 4.32E-03 | 2.18E-02 | Plxnd1,67784:up Cxcl12,20315:up Wnt5a,22418:down Vegfa,22339:down                                                                                                                                                                                                                                                                                                                                                                                                                                                                                                                                                                                                                                                                                                                                                                                                                                                                                                                                                                                                                                                                                                                                                                                                                                                                                                                                                                                                                                                                                                                                                                                                                                                                                                                                                                                                     |
| regulation of monooxygenase activity            | GO:0032768 | 4.32E-03 | 2.18E-02 | Vdr,22337:down Htr2b,15559:down Tnf,21926:up Egfr,13649:down                                                                                                                                                                                                                                                                                                                                                                                                                                                                                                                                                                                                                                                                                                                                                                                                                                                                                                                                                                                                                                                                                                                                                                                                                                                                                                                                                                                                                                                                                                                                                                                                                                                                                                                                                                                                          |
| metal ion transport                             | GO:0030001 | 4.32E-03 | 2.18E-02 | Htr2b,15559:down Vdr,22337:down Cxcl12,20315:up Htr2a,15558:down Serpine2,20720:up Slc40a1,53945:up Gas6,14456:up Trf,22041:up Fxyd1,56188:up Glp1r,14652:down Cd4,12504:up Ccl12,20293:up Ptgs2,19225:down Stc1,20855:up Tfrc,22042:up Kcnj15,16516:down Fxyd2,11936:up Ccl4,20303:up Bmp4,12159:up lgf1,16000:up Tgfb2,21808:down S100a1,20193:up                                                                                                                                                                                                                                                                                                                                                                                                                                                                                                                                                                                                                                                                                                                                                                                                                                                                                                                                                                                                                                                                                                                                                                                                                                                                                                                                                                                                                                                                                                                   |
| regulation of apoptotic signaling pathway       | GO:2001233 | 4.36E-03 | 2.20E-02 | Tnf,21926:up Tnfrsf23,79201:down Fgfr1,14182:down Sfrp1,20377:up Hmox1,15368:up Inhba,16323:down lgf1,16000:up Bmp4,12159:up Tnfrsf12a,27279:down Sfrp2,20319:up Cxcl12,20315:up Tgfb2,21808:down Cx3cr1,13051:down Creb3l1,26427:down                                                                                                                                                                                                                                                                                                                                                                                                                                                                                                                                                                                                                                                                                                                                                                                                                                                                                                                                                                                                                                                                                                                                                                                                                                                                                                                                                                                                                                                                                                                                                                                                                                |

|                                                                        |            |          |          |                                                                                                                                                                                                                                                                                                                                                                                                                                                                                                                                                                                                                                                                                                                                                                                                                                                                                                                                                                                                                                                                                                                                                                                                                                                                                          |
|------------------------------------------------------------------------|------------|----------|----------|------------------------------------------------------------------------------------------------------------------------------------------------------------------------------------------------------------------------------------------------------------------------------------------------------------------------------------------------------------------------------------------------------------------------------------------------------------------------------------------------------------------------------------------------------------------------------------------------------------------------------------------------------------------------------------------------------------------------------------------------------------------------------------------------------------------------------------------------------------------------------------------------------------------------------------------------------------------------------------------------------------------------------------------------------------------------------------------------------------------------------------------------------------------------------------------------------------------------------------------------------------------------------------------|
| single-organism localization                                           | GO:1902578 | 4.36E-03 | 2.20E-02 | Adm,11535:up Sfrp4,20379:up C3,12266:up Ankrd1,107765:down Trf,22041:up Cd24a,12484:down Wnt5a,22418:down Stc1,20855:up Il1rn,16181:up Maob,109731:up Adipoq,11450:up Bmp4,12159:up Igf1,16000:up Mcoln2,68279:up Tgfb2,21808:down Fgfr2,14183:up Clec4e,56619:up Htr2b,15559:down Vdr,22337:down Fam132b,227358:down Cxcl12,20315:up Htr2a,15558:down Slc16a4,229699:down Slc40a1,53945:up Gas6,14456:up Egfr,13649:down Sec23a,20334:down Sfrp1,20377:up C1qtnf3,81799:down Tfrc,22042:up Fxyd2,11936:up Snog,20618:up Serinc2,230779:down Ceacam1,26365:up Sfrp2,20319:up Sytn11,80976:up S100a1,20193:up Ccl2,20296:up Ednrb,13618:up Mmp13,17386:up Slc29a1,63959:up Gpm6b,14758:up Clec4n,56620:up Steap1,70358:down Postn,50706:down Cdo1,12583:up Ptx3,19288:up Hvcn1,74096:up Akr1c18,105349:up Fabp5,16592:up Ncam1,17967:down Ccl12,20293:up Bmpr1a,12166:down Ccl4,20303:up Ank,11732:down Creb3l1,26427:down Il1rl1,17082:down Inhba,16323:down Ccl3,20302:up Vegfa,22339:down Serpine2,20720:up Lrrc15,74488:down Anpep,16790:up Kdelr3,105785:down Pparg,19016:up Tnf,21926:up Fxyd1,56188:up Glp1r,14652:down Fgfr1,14182:down Lpl,16956:up Hmox1,15368:up Cd4,12504:up Ptgs2,19225:down Grem1,23892:up Kcnj15,16516:down Mcoln3,171166:up Emb,13723:up Enpp1,18605:down |
| regulation of carbohydrate biosynthetic process                        | GO:0043255 | 4.38E-03 | 2.20E-02 | Has2,15117:down C1qtnf3,81799:down Enpp1,18605:down Igf2,16002:up Igf1,16000:up Adipoq,11450:up                                                                                                                                                                                                                                                                                                                                                                                                                                                                                                                                                                                                                                                                                                                                                                                                                                                                                                                                                                                                                                                                                                                                                                                          |
| Ras protein signal transduction                                        | GO:0007265 | 4.45E-03 | 2.24E-02 | Ccl9,20308:up Ccl6,20305:up Ccl7,20306:up Ccl2,20296:up Ccl3,20302:up Dok2,13449:up Col1a2,12843:down Plk2,20620:down Ccl12,20293:up Wnt5a,22418:down Ccl4,20303:up Igf1,16000:up Col3a1,12825:down Ccl8,20307:up Tgfb2,21808:down Kitl,17311:up                                                                                                                                                                                                                                                                                                                                                                                                                                                                                                                                                                                                                                                                                                                                                                                                                                                                                                                                                                                                                                         |
| regulation of cell morphogenesis                                       | GO:0022604 | 4.49E-03 | 2.25E-02 | Plxnd1,67784:up Ccl2,20296:up Ccl3,20302:up Sema7a,20361:down Tnfrsf12a,27279:down Cxcl12,20315:up Postn,50706:down Vegfa,22339:down Sfrp1,20377:up Has2,15117:down Ccl12,20293:up Tgfb3,21814:up Wnt5a,22418:down Grem1,23892:up Sfrp2,20319:up Crabp2,12904:down Ret,19713:up Tgfb2,21808:down                                                                                                                                                                                                                                                                                                                                                                                                                                                                                                                                                                                                                                                                                                                                                                                                                                                                                                                                                                                         |
| positive regulation of leukocyte activation                            | GO:0002696 | 4.50E-03 | 2.26E-02 | Gas6,14456:up Cd24a,12484:down Wnt5a,22418:down Ccl2,20296:up Cd4,12504:up Tfrc,22042:up Igf1,16000:up Ceacam1,26365:up Igf2,16002:up Il1rl1,17082:down Tnfsf9,21950:up                                                                                                                                                                                                                                                                                                                                                                                                                                                                                                                                                                                                                                                                                                                                                                                                                                                                                                                                                                                                                                                                                                                  |
| vitamin metabolic process                                              | GO:0006766 | 4.52E-03 | 2.26E-02 | Vdr,22337:down Tnf,21926:up Akr1c18,105349:up Fgfr1,14182:down Pdxk,216134:up                                                                                                                                                                                                                                                                                                                                                                                                                                                                                                                                                                                                                                                                                                                                                                                                                                                                                                                                                                                                                                                                                                                                                                                                            |
| regulation of viral genome replication                                 | GO:0045069 | 4.52E-03 | 2.26E-02 | Ceacam1,26365:up Tnf,21926:up Oasl1,231655:up Slpi,20568:up Oas3,246727:up                                                                                                                                                                                                                                                                                                                                                                                                                                                                                                                                                                                                                                                                                                                                                                                                                                                                                                                                                                                                                                                                                                                                                                                                               |
| cellular response to organic cyclic compound                           | GO:0071407 | 4.55E-03 | 2.27E-02 | Htr2b,15559:down Tnf,21926:up Pparg,19016:up Akr1c18,105349:up Egfr,13649:down Alpl,11647:up Sfrp1,20377:up Inhba,16323:down Ccl12,20293:up Igf1,16000:up Bmp4,12159:up Adipoq,11450:up Vdr,22337:down Mmp2,17390:down Iffit1,15957:up                                                                                                                                                                                                                                                                                                                                                                                                                                                                                                                                                                                                                                                                                                                                                                                                                                                                                                                                                                                                                                                   |
| regulation of cell activation                                          | GO:0050865 | 4.55E-03 | 2.27E-02 | Ccl2,20296:up Ctla2a,13024:down Serpine2,20720:up Igf2,16002:up Gas6,14456:up Cd24a,12484:down Hmox1,15368:up Sfrp1,20377:up Cd4,12504:up Wnt5a,22418:down Tfrc,22042:up Bmp4,12159:up Igf1,16000:up Ceacam1,26365:up Tnfsf9,21950:up Il1rl1,17082:down                                                                                                                                                                                                                                                                                                                                                                                                                                                                                                                                                                                                                                                                                                                                                                                                                                                                                                                                                                                                                                  |
| positive regulation of bone resorption                                 | GO:0045780 | 4.57E-03 | 2.27E-02 | Trf,22041:up Egfr,13649:down Tfrc,22042:up                                                                                                                                                                                                                                                                                                                                                                                                                                                                                                                                                                                                                                                                                                                                                                                                                                                                                                                                                                                                                                                                                                                                                                                                                                               |
| negative regulation of cytokine production involved in immune response | GO:0002719 | 4.57E-03 | 2.27E-02 | Tnf,21926:up Hmox1,15368:up Tgfb2,21808:down                                                                                                                                                                                                                                                                                                                                                                                                                                                                                                                                                                                                                                                                                                                                                                                                                                                                                                                                                                                                                                                                                                                                                                                                                                             |
| regulation of macrophage derived foam cell differentiation             | GO:0010743 | 4.57E-03 | 2.27E-02 | Pparg,19016:up Lpl,16956:up Adipoq,11450:up                                                                                                                                                                                                                                                                                                                                                                                                                                                                                                                                                                                                                                                                                                                                                                                                                                                                                                                                                                                                                                                                                                                                                                                                                                              |
| regulation of non-canonical Wnt signaling pathway                      | GO:2000050 | 4.57E-03 | 2.27E-02 | Sfrp2,20319:up Sfrp1,20377:up Wnt5a,22418:down                                                                                                                                                                                                                                                                                                                                                                                                                                                                                                                                                                                                                                                                                                                                                                                                                                                                                                                                                                                                                                                                                                                                                                                                                                           |
| positive regulation of bone remodeling                                 | GO:0046852 | 4.57E-03 | 2.27E-02 | Trf,22041:up Egfr,13649:down Tfrc,22042:up                                                                                                                                                                                                                                                                                                                                                                                                                                                                                                                                                                                                                                                                                                                                                                                                                                                                                                                                                                                                                                                                                                                                                                                                                                               |
| SMAD protein import into nucleus                                       | GO:0007184 | 4.57E-03 | 2.27E-02 | Tgfb2,21808:down Bmpr1a,12166:down Bmp4,12159:up                                                                                                                                                                                                                                                                                                                                                                                                                                                                                                                                                                                                                                                                                                                                                                                                                                                                                                                                                                                                                                                                                                                                                                                                                                         |
| positive regulation of myoblast fusion                                 | GO:1901741 | 4.57E-03 | 2.27E-02 | Ccl8,20307:up Cxcl9,17329:up Cxcl12,20315:up                                                                                                                                                                                                                                                                                                                                                                                                                                                                                                                                                                                                                                                                                                                                                                                                                                                                                                                                                                                                                                                                                                                                                                                                                                             |
| regulation of I-kappaB kinase/NF-kappaB signaling                      | GO:0043122 | 4.59E-03 | 2.27E-02 | Tnf,21926:up Plk2,20620:down Hmox1,15368:up C1qtnf3,81799:down Ptgs2,19225:down Grem1,23892:up Adipoq,11450:up Clec4n,56620:up Il1rl1,17082:down                                                                                                                                                                                                                                                                                                                                                                                                                                                                                                                                                                                                                                                                                                                                                                                                                                                                                                                                                                                                                                                                                                                                         |
| positive regulation of reactive oxygen species metabolic process       | GO:2000379 | 4.64E-03 | 2.27E-02 | Tnf,21926:up Akr1c18,105349:up Ptx3,19288:up Ddah1,69219:down Egfr,13649:down Ptgs2,19225:down                                                                                                                                                                                                                                                                                                                                                                                                                                                                                                                                                                                                                                                                                                                                                                                                                                                                                                                                                                                                                                                                                                                                                                                           |
| ear morphogenesis                                                      | GO:0042471 | 4.65E-03 | 2.27E-02 | Cthrc1,68588:down Fgfr1,14182:down Col11a1,12814:down Ptk7,71461:down Wnt5a,22418:down Aldh1a3,56847:down Fgfr2,14183:up                                                                                                                                                                                                                                                                                                                                                                                                                                                                                                                                                                                                                                                                                                                                                                                                                                                                                                                                                                                                                                                                                                                                                                 |
| virion attachment to host cell                                         | GO:0019062 | 4.66E-03 | 2.27E-02 | Gas6,14456:up Lrrc15,74488:down                                                                                                                                                                                                                                                                                                                                                                                                                                                                                                                                                                                                                                                                                                                                                                                                                                                                                                                                                                                                                                                                                                                                                                                                                                                          |
| negative regulation of mesonephros development                         | GO:0061218 | 4.66E-03 | 2.27E-02 | Grem1,23892:up Bmp4,12159:up                                                                                                                                                                                                                                                                                                                                                                                                                                                                                                                                                                                                                                                                                                                                                                                                                                                                                                                                                                                                                                                                                                                                                                                                                                                             |
| cardiac muscle fiber development                                       | GO:0048739 | 4.66E-03 | 2.27E-02 | Vegfa,22339:down Bmp4,12159:up                                                                                                                                                                                                                                                                                                                                                                                                                                                                                                                                                                                                                                                                                                                                                                                                                                                                                                                                                                                                                                                                                                                                                                                                                                                           |
| response to UV-A                                                       | GO:0070141 | 4.66E-03 | 2.27E-02 | Egfr,13649:down Mme,17380:up                                                                                                                                                                                                                                                                                                                                                                                                                                                                                                                                                                                                                                                                                                                                                                                                                                                                                                                                                                                                                                                                                                                                                                                                                                                             |
| positive regulation of axon extension involved in axon guidance        | GO:0048842 | 4.66E-03 | 2.27E-02 | Cxcl12,20315:up Vegfa,22339:down                                                                                                                                                                                                                                                                                                                                                                                                                                                                                                                                                                                                                                                                                                                                                                                                                                                                                                                                                                                                                                                                                                                                                                                                                                                         |
| positive regulation of axon guidance                                   | GO:1902669 | 4.66E-03 | 2.27E-02 | Cxcl12,20315:up Vegfa,22339:down                                                                                                                                                                                                                                                                                                                                                                                                                                                                                                                                                                                                                                                                                                                                                                                                                                                                                                                                                                                                                                                                                                                                                                                                                                                         |



|                                                            |            |          |          |                                                                                                                                                                                                                                               |
|------------------------------------------------------------|------------|----------|----------|-----------------------------------------------------------------------------------------------------------------------------------------------------------------------------------------------------------------------------------------------|
| negative regulation of non-canonical Wnt signaling pathway | GO:2000051 | 4.66E-03 | 2.27E-02 | Sfrp2,20319:up Sfrp1,20377:up                                                                                                                                                                                                                 |
| forebrain ventricular zone progenitor cell division        | GO:0021869 | 4.66E-03 | 2.27E-02 | Fgfr1,14182:down Fgfr2,14183:up                                                                                                                                                                                                               |
| regulation of endodermal cell differentiation              | GO:1903224 | 4.66E-03 | 2.27E-02 | Col5a2,12832:down Col5a1,12831:down                                                                                                                                                                                                           |
| negative regulation of receptor biosynthetic process       | GO:0010871 | 4.66E-03 | 2.27E-02 | Pparg,19016:up Adipoq,11450:up                                                                                                                                                                                                                |
| negative regulation of bone development                    | GO:1903011 | 4.66E-03 | 2.27E-02 | Fam101b,76566:down Grem1,23892:up                                                                                                                                                                                                             |
| stress response to metal ion                               | GO:0097501 | 4.66E-03 | 2.27E-02 | Mt2,17750:up Mt1,17748:up                                                                                                                                                                                                                     |
| adhesion of symbiont to host cell                          | GO:0044650 | 4.66E-03 | 2.27E-02 | Gas6,14456:up Lrrc15,74488:down                                                                                                                                                                                                               |
| positive regulation of catecholamine metabolic process     | GO:0045915 | 4.66E-03 | 2.27E-02 | Maob,109731:up Epas1,13819:up                                                                                                                                                                                                                 |
| regulation of phosphatidylinositol biosynthetic process    | GO:0010511 | 4.66E-03 | 2.27E-02 | Htr2b,15559:down Htr2a,15558:down                                                                                                                                                                                                             |
| regulation of peptidyl-tyrosine autophosphorylation        | GO:1900084 | 4.66E-03 | 2.27E-02 | Vegfa,22339:down Grem1,23892:up                                                                                                                                                                                                               |
| integrin biosynthetic process                              | GO:0045112 | 4.66E-03 | 2.27E-02 | Col5a1,12831:down Tgfb2,21808:down                                                                                                                                                                                                            |
| positive regulation of dopamine metabolic process          | GO:0045964 | 4.66E-03 | 2.27E-02 | Maob,109731:up Epas1,13819:up                                                                                                                                                                                                                 |
| cellular response to nitrogen compound                     | GO:1901699 | 4.66E-03 | 2.27E-02 | Htr2b,15559:down Col5a2,12832:down Tnf,21926:up Pparg,19016:up Col1a2,12843:down Egfr,13649:down Sfrp1,20377:up Pdgfc,54635:down Col3a1,12825:down lgf1,16000:up Adipoq,11450:up Mmp2,17390:down fit1,15957:up Enpp1,18605:down lgf2,16002:up |
| NF-kappaB import into nucleus                              | GO:0042348 | 4.76E-03 | 2.30E-02 | Tnf,21926:up C1qtnf3,81799:down Ptgs2,19225:down Grem1,23892:up                                                                                                                                                                               |
| activated T cell proliferation                             | GO:0050798 | 4.76E-03 | 2.30E-02 | Cd24a,12484:down lgf2,16002:up Tnfsf9,21950:up lgf1,16000:up                                                                                                                                                                                  |
| regulation of NF-kappaB import into nucleus                | GO:0042345 | 4.76E-03 | 2.30E-02 | Tnf,21926:up C1qtnf3,81799:down Ptgs2,19225:down Grem1,23892:up                                                                                                                                                                               |
| negative regulation of hemostasis                          | GO:1900047 | 4.76E-03 | 2.30E-02 | Ceacam1,26365:up Kng1,16644:up Serping1,12258:up Serpine2,20720:up                                                                                                                                                                            |
| cell adhesion mediated by integrin                         | GO:0033627 | 4.76E-03 | 2.30E-02 | Cd24a,12484:down Ret,19713:up Tgfb2,21808:down Npnt,114249:up                                                                                                                                                                                 |
| negative regulation of blood coagulation                   | GO:0030195 | 4.76E-03 | 2.30E-02 | Ceacam1,26365:up Kng1,16644:up Serping1,12258:up Serpine2,20720:up                                                                                                                                                                            |
| regulation of leukocyte activation                         | GO:0002694 | 4.77E-03 | 2.31E-02 | Gas6,14456:up Cd24a,12484:down Sfrp1,20377:up Hmox1,15368:up Wnt5a,22418:down Ccl2,20296:up Ccl3,12504:up Tfrc,22042:up lgf1,16000:up Bmp4,12159:up Ctla2a,13024:down Ceacam1,26365:up lgf2,16002:up l1r1,17082:down Tnfsf9,21950:up          |
| lipid storage                                              | GO:0019915 | 4.85E-03 | 2.34E-02 | Tnf,21926:up Pparg,19016:up Lpl,16956:up C3,12266:up Enpp1,18605:down                                                                                                                                                                         |
| interleukin-1 production                                   | GO:0032612 | 4.85E-03 | 2.34E-02 | Ceacam1,26365:up Gas6,14456:up Wnt5a,22418:down Errfi1,74155:down Ccl3,20302:up                                                                                                                                                               |
| interleukin-6 production                                   | GO:0032635 | 4.88E-03 | 2.35E-02 | Tnf,21926:up Gas6,14456:up Prg4,96875:down C1qtnf3,81799:down Wnt5a,22418:down Figf,14205:up Tnfsf9,21950:up                                                                                                                                  |
| regulation of organ growth                                 | GO:0046620 | 4.91E-03 | 2.37E-02 | Fgfr1,14182:down Ncam1,17967:down Bmpr1a,12166:down Wisp1,22402:down Fgfr2,14183:up lgf1,16000:up                                                                                                                                             |
| production of molecular mediator of immune response        | GO:0002440 | 5.08E-03 | 2.44E-02 | Tnf,21926:up Gas6,14456:up Hmox1,15368:up Wnt5a,22418:down Tfrc,22042:up Sema7a,20361:down Ceacam1,26365:up Tgfb2,21808:down                                                                                                                  |
| mammary gland development                                  | GO:0030879 | 5.11E-03 | 2.46E-02 | Vdr,22337:down Wnt5a,22418:down Vegfa,22339:down Fgfr2,14183:up lgf1,16000:up Cdo1,12583:up Bmp4,12159:up                                                                                                                                     |
| protein localization to nucleus                            | GO:0034504 | 5.18E-03 | 2.49E-02 | Tnf,21926:up Gas6,14456:up Akr1c18,105349:up Egfr,13649:down C1qtnf3,81799:down Bmpr1a,12166:down Ptgs2,19225:down Grem1,23892:up lgf1,16000:up Bmp4,12159:up Ceacam1,26365:up Sfrp2,20319:up Tgfb2,21808:down                                |
| smooth muscle contraction                                  | GO:0006939 | 5.19E-03 | 2.49E-02 | Htr2b,15559:down Sulf1,240725:down Htr2a,15558:down Ptgs2,19225:down Npnt,114249:up Ednrb,13618:up                                                                                                                                            |
| epithelial cell apoptotic process                          | GO:1904019 | 5.19E-03 | 2.49E-02 | Gas6,14456:up Akr1c18,105349:up Hmox1,15368:up Sfrp4,20379:up lgf1,16000:up Bmp4,12159:up                                                                                                                                                     |
| endoderm development                                       | GO:0007492 | 5.20E-03 | 2.49E-02 | Col5a2,12832:down Col5a1,12831:down Inhba,16323:down Bmpr1a,12166:down Bmp4,12159:up                                                                                                                                                          |
| ventricular septum development                             | GO:0003281 | 5.20E-03 | 2.49E-02 | Ptk7,71461:down Wnt5a,22418:down Tgfb2,21808:down Fgfr2,14183:up Bmp4,12159:up                                                                                                                                                                |
| regulation of steroid biosynthetic process                 | GO:0050810 | 5.20E-03 | 2.49E-02 | Vdr,22337:down Tnf,21926:up Akr1c18,105349:up lgf2,16002:up lgf1,16000:up                                                                                                                                                                     |

|                                                                                   |            |          |          |                                                                                                                                                                                                                                                                                                                                                                                                |
|-----------------------------------------------------------------------------------|------------|----------|----------|------------------------------------------------------------------------------------------------------------------------------------------------------------------------------------------------------------------------------------------------------------------------------------------------------------------------------------------------------------------------------------------------|
| neuron projection extension involved in neuron projection guidance                | GO:1902284 | 5.23E-03 | 2.49E-02 | Plxnd1,67784:up Cxcl12,20315:up Wnt5a,22418:down Vegfa,22339:down                                                                                                                                                                                                                                                                                                                              |
| regulation of transcription from RNA polymerase II promoter in response to stress | GO:0043618 | 5.23E-03 | 2.49E-02 | Hmox1,15368:up Vegfa,22339:down Creb3l1,26427:down Epas1,13819:up                                                                                                                                                                                                                                                                                                                              |
| negative regulation of leukocyte mediated immunity                                | GO:0002704 | 5.23E-03 | 2.49E-02 | Ceacam1,26365:up Clec2d,93694:up Hmox1,15368:up Igf2,16002:up                                                                                                                                                                                                                                                                                                                                  |
| axon extension involved in axon guidance                                          | GO:0048846 | 5.23E-03 | 2.49E-02 | Plxnd1,67784:up Cxcl12,20315:up Wnt5a,22418:down Vegfa,22339:down                                                                                                                                                                                                                                                                                                                              |
| negative regulation of peptidyl-tyrosine phosphorylation                          | GO:0050732 | 5.23E-03 | 2.49E-02 | Sfrp2,20319:up Sfrp1,20377:up Errfi1,74155:down Igf1,16000:up                                                                                                                                                                                                                                                                                                                                  |
| retinoid metabolic process                                                        | GO:0001523 | 5.23E-03 | 2.49E-02 | Crabp2,12904:down Akr1c18,105349:up Aldh1a2,19378:up Aldh1a3,56847:down                                                                                                                                                                                                                                                                                                                        |
| regulation of metanephros development                                             | GO:0072215 | 5.30E-03 | 2.51E-02 | Ret,19713:up Bmp4,12159:up Adipoq,11450:up                                                                                                                                                                                                                                                                                                                                                     |
| post-anal tail morphogenesis                                                      | GO:0036342 | 5.30E-03 | 2.51E-02 | Chst11,58250:down Sfrp2,20319:up Wnt5a,22418:down                                                                                                                                                                                                                                                                                                                                              |
| cellular metabolic compound salvage                                               | GO:0043094 | 5.30E-03 | 2.51E-02 | Pdxk,216134:up Uck2,80914:down Ampd3,11717:up                                                                                                                                                                                                                                                                                                                                                  |
| positive regulation of NF-kappaB import into nucleus                              | GO:0042346 | 5.30E-03 | 2.51E-02 | Tnf,21926:up Ptgs2,19225:down Grem1,23892:up                                                                                                                                                                                                                                                                                                                                                   |
| regulation of cell migration involved in sprouting angiogenesis                   | GO:0090049 | 5.30E-03 | 2.51E-02 | Srpx2,68792:down Vegfa,22339:down Ptgs2,19225:down                                                                                                                                                                                                                                                                                                                                             |
| viral life cycle                                                                  | GO:0019058 | 5.51E-03 | 2.61E-02 | Tnf,21926:up Gas6,14456:up Ptx3,19288:up Slpi,20568:up Ccl4,20303:up Ceacam1,26365:up Oasl1,231655:up Lrrc15,74488:down Oas3,246727:up                                                                                                                                                                                                                                                         |
| regulation of oxidoreductase activity                                             | GO:0051341 | 5.57E-03 | 2.63E-02 | Vdr,22337:down Htr2b,15559:down Tnf,21926:up Egfr,13649:down Hp,15439:up                                                                                                                                                                                                                                                                                                                       |
| carboxylic acid metabolic process                                                 | GO:0019752 | 5.70E-03 | 2.69E-02 | P4ha1,18451:down Hpgd,15446:up Aldh1a2,19378:up C3,12266:up Ddah1,69219:down Fabp4,11770:up Fam132b,227358:down Htr2a,15558:down Gfpt2,14584:down Npl,74091:up Cdo1,12583:up Pparg,19016:up Ggt5,23887:up Akr1c18,105349:up Lpl,16956:up Ptgs2,19225:down Serinc2,230779:down Adipoq,11450:up Hal,15109:up Igf1,16000:up Crabp2,12904:down Gatm,67092:down Aldh1a3,56847:down Prkar2b,19088:up |
| negative regulation of secretion by cell                                          | GO:1903531 | 5.71E-03 | 2.69E-02 | Tnf,21926:up Pparg,19016:up Gas6,14456:up Sfrp1,20377:up Hmox1,15368:up C1qtnf3,81799:down Il1rn,16181:up Maob,109731:up Adipoq,11450:up                                                                                                                                                                                                                                                       |
| regulation of cardiac muscle hypertrophy                                          | GO:0010611 | 5.73E-03 | 2.69E-02 | Lmcd1,30937:up Wisp1,22402:down Errfi1,74155:down Igf1,16000:up                                                                                                                                                                                                                                                                                                                                |
| positive regulation of transcription factor import into nucleus                   | GO:0042993 | 5.73E-03 | 2.69E-02 | Ceacam1,26365:up Tnf,21926:up Ptgs2,19225:down Grem1,23892:up                                                                                                                                                                                                                                                                                                                                  |
| positive regulation of axon extension                                             | GO:0045773 | 5.73E-03 | 2.69E-02 | Tnfrsf12a,27279:down Cxcl12,20315:up Vegfa,22339:down Sema7a,20361:down                                                                                                                                                                                                                                                                                                                        |
| negative regulation of coagulation                                                | GO:0050819 | 5.73E-03 | 2.69E-02 | Ceacam1,26365:up Kng1,16644:up Serping1,12258:up Serpine2,20720:up                                                                                                                                                                                                                                                                                                                             |
| regulation of cellular carbohydrate metabolic process                             | GO:0010675 | 5.73E-03 | 2.69E-02 | Igfbp4,16010:up C1qtnf3,81799:down Igf1,16000:up Adipoq,11450:up Htr2a,15558:down Igf1,16000:up Igf2,16002:up Enpp1,18605:down                                                                                                                                                                                                                                                                 |
| regulation of viral life cycle                                                    | GO:1903900 | 5.87E-03 | 2.76E-02 | Ceacam1,26365:up Tnf,21926:up Ptx3,19288:up Oasl1,231655:up Slpi,20568:up Oas3,246727:up Ccl4,20303:up                                                                                                                                                                                                                                                                                         |
| cell fate commitment                                                              | GO:0045165 | 5.90E-03 | 2.77E-02 | Pparg,19016:up Fgfr1,14182:down Ly9,17085:up Sfrp1,20377:up Wnt5a,22418:down Bmpr1a,12166:down Epas1,13819:up Bmp4,12159:up Sfrp2,20319:up Tgfb2,21808:down Fgfr2,14183:up                                                                                                                                                                                                                     |
| fibroblast growth factor receptor signaling pathway                               | GO:0008543 | 5.95E-03 | 2.79E-02 | Flrt2,399558:down Fgfr1,14182:down Sulf1,240725:down Wnt5a,22418:down Fgfr2,14183:up                                                                                                                                                                                                                                                                                                           |
| negative regulation of leukocyte proliferation                                    | GO:0070664 | 5.95E-03 | 2.79E-02 | Ceacam1,26365:up Cd24a,12484:down Ccl12,20293:up Grem1,23892:up Bmp4,12159:up                                                                                                                                                                                                                                                                                                                  |
| negative regulation of synaptic transmission                                      | GO:0050805 | 5.95E-03 | 2.79E-02 | Plk2,20620:down Gpm6b,14758:up Htr2a,15558:down Ptgs2,19225:down Adipoq,11450:up                                                                                                                                                                                                                                                                                                               |
| embryonic digit morphogenesis                                                     | GO:0042733 | 5.95E-03 | 2.79E-02 | Chst11,58250:down Sfrp2,20319:up Wnt5a,22418:down Bmpr1a,12166:down Bmp4,12159:up                                                                                                                                                                                                                                                                                                              |
| embryonic organ morphogenesis                                                     | GO:0048562 | 5.96E-03 | 2.79E-02 | Cthrc1,68588:down Fgfr1,14182:down Col11a1,12814:down Ptk7,71461:down Wnt5a,22418:down Aldh1a2,19378:up Bmp4,12159:up Chst11,58250:down Tbx15,21384:down Tgfb2,21808:down Aldh1a3,56847:down Fgfr2,14183:up                                                                                                                                                                                    |
| negative regulation of stem cell proliferation                                    | GO:2000647 | 6.11E-03 | 2.84E-02 | Cd24a,12484:down Wnt5a,22418:down Bmp4,12159:up                                                                                                                                                                                                                                                                                                                                                |
| endochondral bone growth                                                          | GO:0003416 | 6.11E-03 | 2.84E-02 | Stc1,20855:up Bnc2,242509:down Mmp13,17386:up                                                                                                                                                                                                                                                                                                                                                  |
| negative regulation of interleukin-1 production                                   | GO:0032692 | 6.11E-03 | 2.84E-02 | Ceacam1,26365:up Gas6,14456:up Errfi1,74155:down                                                                                                                                                                                                                                                                                                                                               |

|                                                                         |            |          |          |                                                                                                                                                                                                                                                                                                                                                                                                                                                                                                                                                                                                                                                                                                                                                                                                                                                                                                         |
|-------------------------------------------------------------------------|------------|----------|----------|---------------------------------------------------------------------------------------------------------------------------------------------------------------------------------------------------------------------------------------------------------------------------------------------------------------------------------------------------------------------------------------------------------------------------------------------------------------------------------------------------------------------------------------------------------------------------------------------------------------------------------------------------------------------------------------------------------------------------------------------------------------------------------------------------------------------------------------------------------------------------------------------------------|
| positive regulation of positive chemotaxis                              | GO:0050927 | 6.11E-03 | 2.84E-02 | Cxcl12,20315:up Vegfa,22339:down Figf,14205:up                                                                                                                                                                                                                                                                                                                                                                                                                                                                                                                                                                                                                                                                                                                                                                                                                                                          |
| response to prostaglandin                                               | GO:0034694 | 6.11E-03 | 2.84E-02 | Akr1c18,105349:up Tgfbf3,21814:up Ptgir,19222:up                                                                                                                                                                                                                                                                                                                                                                                                                                                                                                                                                                                                                                                                                                                                                                                                                                                        |
| paraxial mesoderm development                                           | GO:0048339 | 6.11E-03 | 2.84E-02 | Fgfr1,14182:down Wnt5a,22418:down Bmpr1a,12166:down                                                                                                                                                                                                                                                                                                                                                                                                                                                                                                                                                                                                                                                                                                                                                                                                                                                     |
| positive regulation of phospholipase C activity                         | GO:0010863 | 6.11E-03 | 2.84E-02 | Htr2b,15559:down Fgfr1,14182:down Htr2a,15558:down                                                                                                                                                                                                                                                                                                                                                                                                                                                                                                                                                                                                                                                                                                                                                                                                                                                      |
| positive regulation of branching involved in ureteric bud morphogenesis | GO:0090190 | 6.11E-03 | 2.84E-02 | Vegfa,22339:down Grem1,23892:up Bmp4,12159:up                                                                                                                                                                                                                                                                                                                                                                                                                                                                                                                                                                                                                                                                                                                                                                                                                                                           |
| regulation of myoblast fusion                                           | GO:1901739 | 6.11E-03 | 2.84E-02 | Ccl8,20307:up Cxcl9,17329:up Cxcl12,20315:up                                                                                                                                                                                                                                                                                                                                                                                                                                                                                                                                                                                                                                                                                                                                                                                                                                                            |
| female gonad development                                                | GO:0008585 | 6.11E-03 | 2.84E-02 | Sfrp1,20377:up Vegfa,22339:down Inhba,16323:down Mmp2,17390:down Kitl,17311:up Bmp4,12159:up                                                                                                                                                                                                                                                                                                                                                                                                                                                                                                                                                                                                                                                                                                                                                                                                            |
| regulation of axon extension                                            | GO:0030516 | 6.11E-03 | 2.84E-02 | Tnfrsf12a,27279:down Plxnd1,67784:up Cxcl12,20315:up Wnt5a,22418:down Vegfa,22339:down Sema7a,20361:down                                                                                                                                                                                                                                                                                                                                                                                                                                                                                                                                                                                                                                                                                                                                                                                                |
| regulation of reactive oxygen species metabolic process                 | GO:2000377 | 6.19E-03 | 2.87E-02 | Tnf,21926:up Akr1c18,105349:up Ptx3,19288:up Egfr,13649:down Hp,15439:up Ptgs2,19225:down Igf1,16000:up Ddah1,69219:down                                                                                                                                                                                                                                                                                                                                                                                                                                                                                                                                                                                                                                                                                                                                                                                |
| negative regulation of metabolic process                                | GO:0009892 | 6.20E-03 | 2.87E-02 | Flrt2,399558:down Sfrp4,20379:up Ednrb,13618:up Cst7,13011:up Epas1,13819:up Ankrd1,107765:down Igf1,16000:up Pgk3,16009:up Cd109,235505:down Loxl2,94352:down Loxl3,16950:down Akr1c18,105349:up Ptx3,19288:up Wnt5a,22418:down Ccl4,20303:up Adipoq,11450:up Bmp4,12159:up Igf1,16000:up Prg4,96875:down Tgfb2,21808:down Plpp3,67916:up Fgfr2,14183:up Htr2b,15559:down Kng1,16644:up Hp,15439:up Slpi,20568:up Aspn,66695:down Plat,18791:down Tfpi2,21789:down Vdr,22337:down Ctla2a,13024:down Fabp4,11770:up Vegfa,22339:down Serpine2,20720:up Lrrc15,74488:down Nxn,18230:down Pparg,19016:up Gas6,14456:up Tnf,21926:up Lmcd1,30937:up Fgfr1,14182:down Egfr,13649:down Hmox1,15368:up Sfrp1,20377:up C1qtnf3,81799:down Tgfbf3,21814:up Grem1,23892:up Ceacam1,26365:up Sfrp2,20319:up Serp1,12258:up Serpina3g,20715:up Prkar2b,19088:up Errfi1,74155:down Enpp1,18605:down S100a1,20193:up |
| peptidyl-amino acid modification                                        | GO:0018193 | 6.21E-03 | 2.88E-02 | P4ha1,18451:down Efemp1,216616:up Pdgc,54635:down Crlf1,12931:down Vegfa,22339:down Htr2a,15558:down Igf2,16002:up Mamdc2,71738:down Gas6,14456:up Tnf,21926:up Plk2,20620:down Fgfr1,14182:down Egfr,13649:down Cd24a,12484:down Sfrp1,20377:up Wnt5a,22418:down Cd4,12504:up Grem1,23892:up Adipoq,11450:up Igf1,16000:up Sfrp2,20319:up Ret,19713:up Plpp3,67916:up Errfi1,74155:down Fgfr2,14183:up Kitl,17311:up                                                                                                                                                                                                                                                                                                                                                                                                                                                                                   |
| patterning of blood vessels                                             | GO:0001569 | 6.26E-03 | 2.89E-02 | Sfrp2,20319:up Plxnd1,67784:up Cxcl12,20315:up Vegfa,22339:down                                                                                                                                                                                                                                                                                                                                                                                                                                                                                                                                                                                                                                                                                                                                                                                                                                         |
| diterpenoid metabolic process                                           | GO:0016101 | 6.26E-03 | 2.89E-02 | Crabp2,12904:down Akr1c18,105349:up Aldh1a2,19378:up Aldh1a3,56847:down                                                                                                                                                                                                                                                                                                                                                                                                                                                                                                                                                                                                                                                                                                                                                                                                                                 |
| brown fat cell differentiation                                          | GO:0050873 | 6.26E-03 | 2.89E-02 | Pparg,19016:up Fabp4,11770:up Ptgs2,19225:down Adipoq,11450:up                                                                                                                                                                                                                                                                                                                                                                                                                                                                                                                                                                                                                                                                                                                                                                                                                                          |
| positive regulation of DNA metabolic process                            | GO:0051054 | 6.34E-03 | 2.92E-02 | Fgfr1,14182:down Egfr,13649:down Pdgc,54635:down Tfrc,22042:up Grem1,23892:up Igf1,16000:up Bmp4,12159:up Igf1,16000:up Kitl,17311:up                                                                                                                                                                                                                                                                                                                                                                                                                                                                                                                                                                                                                                                                                                                                                                   |
| cardiac muscle hypertrophy                                              | GO:0003300 | 6.36E-03 | 2.92E-02 | Htr2b,15559:down Lmcd1,30937:up Wisp1,22402:down Errfi1,74155:down Igf1,16000:up                                                                                                                                                                                                                                                                                                                                                                                                                                                                                                                                                                                                                                                                                                                                                                                                                        |
| positive regulation of canonical Wnt signaling pathway                  | GO:0090263 | 6.36E-03 | 2.92E-02 | Sfrp2,20319:up Sfrp1,20377:up Rspo2,239405:up Sfrp4,20379:up Fgfr2,14183:up                                                                                                                                                                                                                                                                                                                                                                                                                                                                                                                                                                                                                                                                                                                                                                                                                             |
| canonical Wnt signaling pathway                                         | GO:0060070 | 6.40E-03 | 2.92E-02 | Cthrc1,68588:down Sfrp1,20377:up Ptk7,71461:down Wnt5a,22418:down Sfrp4,20379:up Grem1,23892:up Sfrp2,20319:up Rspo2,239405:up Plpp3,67916:up Fgfr2,14183:up                                                                                                                                                                                                                                                                                                                                                                                                                                                                                                                                                                                                                                                                                                                                            |
| negative regulation of Wnt signaling pathway                            | GO:0030178 | 6.42E-03 | 2.92E-02 | Cthrc1,68588:down Sfrp2,20319:up Sfrp1,20377:up Wnt5a,22418:down Sfrp4,20379:up Nxn,18230:down Grem1,23892:up                                                                                                                                                                                                                                                                                                                                                                                                                                                                                                                                                                                                                                                                                                                                                                                           |
| cellular carbohydrate metabolic process                                 | GO:0044262 | 6.43E-03 | 2.92E-02 | Igf1,16010:up Has2,15117:down C1qtnf3,81799:down Aoah,27052:up Igf1,16000:up Adipoq,11450:up Sord,20322:up Htr2a,15558:down Igf1,16000:up Enpp1,18605:down Igf2,16002:up                                                                                                                                                                                                                                                                                                                                                                                                                                                                                                                                                                                                                                                                                                                                |
| negative regulation of canonical Wnt signaling pathway                  | GO:0090090 | 6.44E-03 | 2.92E-02 | Cthrc1,68588:down Sfrp2,20319:up Sfrp1,20377:up Wnt5a,22418:down Sfrp4,20379:up Grem1,23892:up                                                                                                                                                                                                                                                                                                                                                                                                                                                                                                                                                                                                                                                                                                                                                                                                          |
| negative regulation of metanephros development                          | GO:0072217 | 6.44E-03 | 2.92E-02 | Bmp4,12159:up Adipoq,11450:up                                                                                                                                                                                                                                                                                                                                                                                                                                                                                                                                                                                                                                                                                                                                                                                                                                                                           |
| nucleotide salvage                                                      | GO:0043173 | 6.44E-03 | 2.92E-02 | Uck2,80914:down Ampd3,11717:up                                                                                                                                                                                                                                                                                                                                                                                                                                                                                                                                                                                                                                                                                                                                                                                                                                                                          |
| regulation of caldiol 1-monooxygenase activity                          | GO:0060558 | 6.44E-03 | 2.92E-02 | Vdr,22337:down Tnf,21926:up                                                                                                                                                                                                                                                                                                                                                                                                                                                                                                                                                                                                                                                                                                                                                                                                                                                                             |
| parturition                                                             | GO:0007567 | 6.44E-03 | 2.92E-02 | Akr1c18,105349:up Hpgd,15446:up                                                                                                                                                                                                                                                                                                                                                                                                                                                                                                                                                                                                                                                                                                                                                                                                                                                                         |
| positive regulation of phospholipid biosynthetic process                | GO:0071073 | 6.44E-03 | 2.92E-02 | Htr2b,15559:down Htr2a,15558:down                                                                                                                                                                                                                                                                                                                                                                                                                                                                                                                                                                                                                                                                                                                                                                                                                                                                       |
| ferrous iron transport                                                  | GO:0015684 | 6.44E-03 | 2.92E-02 | Trf,22041:up Slc40a1,53945:up                                                                                                                                                                                                                                                                                                                                                                                                                                                                                                                                                                                                                                                                                                                                                                                                                                                                           |
| bud elongation involved in lung branching                               | GO:0060449 | 6.44E-03 | 2.92E-02 | Fgfr2,14183:up Bmp4,12159:up                                                                                                                                                                                                                                                                                                                                                                                                                                                                                                                                                                                                                                                                                                                                                                                                                                                                            |
| fibroblast growth factor production                                     | GO:0090269 | 6.44E-03 | 2.92E-02 | Fgfr1,14182:down Ptgs2,19225:down                                                                                                                                                                                                                                                                                                                                                                                                                                                                                                                                                                                                                                                                                                                                                                                                                                                                       |

|                                                                        |            |          |          |                                                                                                                                                                                                                                                                                                                        |
|------------------------------------------------------------------------|------------|----------|----------|------------------------------------------------------------------------------------------------------------------------------------------------------------------------------------------------------------------------------------------------------------------------------------------------------------------------|
| convergent extension involved in gastrulation                          | GO:0060027 | 6.44E-03 | 2.92E-02 | Sfrp1,20377:up Wnt5a,22418:down                                                                                                                                                                                                                                                                                        |
| epithelial cell proliferation involved in salivary gland morphogenesis | GO:0060664 | 6.44E-03 | 2.92E-02 | Tnf,21926:up Fgfr2,14183:up                                                                                                                                                                                                                                                                                            |
| positive regulation of chemokine (C-X-C motif) ligand 2 production     | GO:2000343 | 6.44E-03 | 2.92E-02 | Tnf,21926:up Postn,50706:down                                                                                                                                                                                                                                                                                          |
| cellular response to zinc ion                                          | GO:0071294 | 6.44E-03 | 2.92E-02 | Hvcn1,74096:up Mt1,17748:up                                                                                                                                                                                                                                                                                            |
| regulation of glycogen (starch) synthase activity                      | GO:2000465 | 6.44E-03 | 2.92E-02 | Igf2,16002:up Adipoq,11450:up                                                                                                                                                                                                                                                                                          |
| blood vessel maturation                                                | GO:0001955 | 6.44E-03 | 2.92E-02 | Lyl1,17095:up Mmp2,17390:down                                                                                                                                                                                                                                                                                          |
| regulation of branching involved in lung morphogenesis                 | GO:0061046 | 6.44E-03 | 2.92E-02 | Tnf,21926:up Bmp4,12159:up                                                                                                                                                                                                                                                                                             |
| regulation of fibroblast growth factor production                      | GO:0090270 | 6.44E-03 | 2.92E-02 | Fgfr1,14182:down Ptgs2,19225:down                                                                                                                                                                                                                                                                                      |
| positive regulation of vasculogenesis                                  | GO:2001214 | 6.44E-03 | 2.92E-02 | Ceacam1,26365:up Adm,11535:up                                                                                                                                                                                                                                                                                          |
| regulation of apoptotic cell clearance                                 | GO:2000425 | 6.44E-03 | 2.92E-02 | Ccl2,20296:up C3,12266:up                                                                                                                                                                                                                                                                                              |
| positive regulation of cell activation                                 | GO:0050867 | 6.62E-03 | 2.99E-02 | Gas6,14456:up Cd24a,12484:down Wnt5a,22418:down Ccl2,20296:up Cd4,12504:up Tfrc,22042:up Igf1,16000:up Ceacam1,26365:up Igf2,16002:up Il1r1,17082:down Tnfsf9,21950:up                                                                                                                                                 |
| positive regulation of lymphocyte proliferation                        | GO:0050671 | 6.71E-03 | 3.03E-02 | Ceacam1,26365:up Cd24a,12484:down Cd4,12504:up Tfrc,22042:up Igf2,16002:up Tnfsf9,21950:up Igf1,16000:up                                                                                                                                                                                                               |
| regulation of vasoconstriction                                         | GO:0019229 | 6.78E-03 | 3.05E-02 | Adm,11535:up Egfr,13649:down Htr2a,15558:down Ptgs2,19225:down Mmp2,17390:down                                                                                                                                                                                                                                         |
| response to heat                                                       | GO:0009408 | 6.78E-03 | 3.05E-02 | Tfec,21426:up Hmox1,15368:up Hspb7,29818:up Ccl2,20296:up Igf1,16000:up                                                                                                                                                                                                                                                |
| regulation of epithelial to mesenchymal transition                     | GO:0010717 | 6.78E-03 | 3.05E-02 | Sfrp2,20319:up Sfrp1,20377:up Tgfb2,21808:down Tgfb3,21814:up Grem1,23892:up                                                                                                                                                                                                                                           |
| leukocyte homeostasis                                                  | GO:0001776 | 6.78E-03 | 3.05E-02 | Ceacam1,26365:up Cd24a,12484:down Tgfb2,21808:down Ccl2,20296:up Slc40a1,53945:up Kitl,17311:up                                                                                                                                                                                                                        |
| development of primary female sexual characteristics                   | GO:0046545 | 6.78E-03 | 3.05E-02 | Sfrp1,20377:up Vegfa,22339:down Inhba,16323:down Mmp2,17390:down Kitl,17311:up Bmp4,12159:up                                                                                                                                                                                                                           |
| positive regulation of receptor-mediated endocytosis                   | GO:0048260 | 6.82E-03 | 3.06E-02 | Trf,22041:up Vegfa,22339:down Sfrp4,20379:up Grem1,23892:up                                                                                                                                                                                                                                                            |
| negative regulation of interleukin-6 production                        | GO:0032715 | 6.82E-03 | 3.06E-02 | Tnf,21926:up Gas6,14456:up Prg4,96875:down C1qtnf3,81799:down                                                                                                                                                                                                                                                          |
| regulation of muscle hypertrophy                                       | GO:0014743 | 6.82E-03 | 3.06E-02 | Lmcd1,30937:up Wisp1,22402:down Errfi1,74155:down Igf1,16000:up                                                                                                                                                                                                                                                        |
| carbohydrate metabolic process                                         | GO:0005975 | 6.86E-03 | 3.08E-02 | Igfbp4,16010:up Aoah,27052:up Sord,20322:up Htr2a,15558:down Gfpt2,14584:down Npl,74091:up Igfbp3,16009:up Igf2,16002:up Man2a2,140481:up Tnf,21926:up Fabp5,16592:up Has2,15117:down C1qtnf3,81799:down Adipoq,11450:up Igf1,16000:up Chst11,58250:down Hpse,15442:up Vegfb,22340:up Sdf2l1,64136:up Enpp1,18605:down |
| positive regulation of T cell activation                               | GO:0050870 | 6.95E-03 | 3.10E-02 | Cd24a,12484:down Ccl2,20296:up Cd4,12504:up Tfrc,22042:up Igf1,16000:up Ceacam1,26365:up Igf2,16002:up Tnfsf9,21950:up                                                                                                                                                                                                 |
| cochlea morphogenesis                                                  | GO:0090103 | 6.98E-03 | 3.10E-02 | Cthrc1,68588:down Ptk7,71461:down Wnt5a,22418:down                                                                                                                                                                                                                                                                     |
| cellular response to nutrient                                          | GO:0031670 | 6.98E-03 | 3.10E-02 | Vdr,22337:down Gas6,14456:up Postn,50706:down                                                                                                                                                                                                                                                                          |
| somatic stem cell division                                             | GO:0048103 | 6.98E-03 | 3.10E-02 | Fgfr1,14182:down Tgfb2,21808:down Fgfr2,14183:up                                                                                                                                                                                                                                                                       |
| positive regulation of receptor internalization                        | GO:0002092 | 6.98E-03 | 3.10E-02 | Vegfa,22339:down Sfrp4,20379:up Grem1,23892:up                                                                                                                                                                                                                                                                         |
| regulation of transforming growth factor beta production               | GO:0071634 | 6.98E-03 | 3.10E-02 | Cd24a,12484:down Tgfb2,21808:down Ptgs2,19225:down                                                                                                                                                                                                                                                                     |
| positive regulation of mesonephros development                         | GO:0061213 | 6.98E-03 | 3.10E-02 | Vegfa,22339:down Grem1,23892:up Bmp4,12159:up                                                                                                                                                                                                                                                                          |
| regulation of positive chemotaxis                                      | GO:0050926 | 6.98E-03 | 3.10E-02 | Cxcl12,20315:up Vegfa,22339:down Figf,14205:up                                                                                                                                                                                                                                                                         |
| monovalent inorganic anion homeostasis                                 | GO:0055083 | 6.98E-03 | 3.10E-02 | Sfrp4,20379:up Stc1,20855:up Enpp1,18605:down                                                                                                                                                                                                                                                                          |
| collagen catabolic process                                             | GO:0030574 | 6.98E-03 | 3.10E-02 | Mmp2,17390:down Mmp13,17386:up Mrc2,17534:down                                                                                                                                                                                                                                                                         |

|                                                                                |            |          |          |                                                                                                                                                                                                                                                                                                         |
|--------------------------------------------------------------------------------|------------|----------|----------|---------------------------------------------------------------------------------------------------------------------------------------------------------------------------------------------------------------------------------------------------------------------------------------------------------|
| macrophage derived foam cell differentiation                                   | GO:0010742 | 6.98E-03 | 3.10E-02 | Pparg,19016:up Lpl,16956:up Adipoq,11450:up                                                                                                                                                                                                                                                             |
| pharyngeal system development                                                  | GO:0060037 | 6.98E-03 | 3.10E-02 | Tgfb2,21808:down Bmpr1a,12166:down Bmp4,12159:up                                                                                                                                                                                                                                                        |
| phosphatidylinositol 3-kinase signaling                                        | GO:0014065 | 7.14E-03 | 3.16E-02 | Htr2b,15559:down Tgfb2,21808:down Htr2a,15558:down Pdgfc,54635:down Serpine2,20720:up Igf1,16000:up                                                                                                                                                                                                     |
| positive regulation of cell-substrate adhesion                                 | GO:0010811 | 7.14E-03 | 3.16E-02 | Has2,15117:down Vegfa,22339:down Npnt,114249:up Smoc2,64074:down Col8a1,12837:down Ninj1,18081:up                                                                                                                                                                                                       |
| cell-cell adhesion via plasma-membrane adhesion molecules                      | GO:0098742 | 7.31E-03 | 3.23E-02 | Ceacam1,26365:up Pcdh19,279653:down Cd24a,12484:down Ret,19713:up Tgfb2,21808:down Il1rn,16181:up Adipoq,11450:up                                                                                                                                                                                       |
| positive regulation of mononuclear cell proliferation                          | GO:0032946 | 7.31E-03 | 3.23E-02 | Ceacam1,26365:up Cd24a,12484:down Cd4,12504:up Tfrc,22042:up Igf2,16002:up Tnfsf9,21950:up Igf1,16000:up                                                                                                                                                                                                |
| apoptotic signaling pathway                                                    | GO:0097190 | 7.33E-03 | 3.24E-02 | Inhba,16323:down Tnfrsf12a,27279:down Vdr,22337:down Cxcl12,20315:up Cx3cr1,13051:down Tnf,21926:up Tnfrsf23,79201:down Cd24a,12484:down Fgfr1,14182:down Hmox1,15368:up Sfrp1,20377:up Bmp4,12159:up Igf1,16000:up Sfrp2,20319:up Tgfb2,21808:down Tnfrsf11b,18383:up Creb3l1,26427:down Kitl,17311:up |
| regulation of extrinsic apoptotic signaling pathway via death domain receptors | GO:1902041 | 7.41E-03 | 3.27E-02 | Sfrp2,20319:up Tnfrsf23,79201:down Sfrp1,20377:up Hmox1,15368:up                                                                                                                                                                                                                                        |
| mesenchyme morphogenesis                                                       | GO:0072132 | 7.41E-03 | 3.27E-02 | Fgfr1,14182:down Wnt5a,22418:down Tgfb2,21808:down Bmpr1a,12166:down                                                                                                                                                                                                                                    |
| regulation of phospholipase activity                                           | GO:0010517 | 7.41E-03 | 3.27E-02 | Htr2b,15559:down Fgfr1,14182:down Htr2a,15558:down Fgfr2,14183:up                                                                                                                                                                                                                                       |
| regulation of DNA-templated transcription in response to stress                | GO:0043620 | 7.41E-03 | 3.27E-02 | Hmox1,15368:up Vegfa,22339:down Creb3l1,26427:down Epas1,13819:up                                                                                                                                                                                                                                       |
| carbohydrate biosynthetic process                                              | GO:0016051 | 7.49E-03 | 3.30E-02 | Has2,15117:down C1qtnf3,81799:down Igf1,16000:up Adipoq,11450:up Sord,20322:up Chst11,58250:down Igf2,16002:up Enpp1,18605:down                                                                                                                                                                         |
| positive regulation of I-kappaB kinase/NF-kappaB signaling                     | GO:0043123 | 7.63E-03 | 3.36E-02 | Tnf,21926:up Plk2,20620:down Clec4n,56620:up Hmox1,15368:up Ptgs2,19225:down Grem1,23892:up Adipoq,11450:up                                                                                                                                                                                             |
| striated muscle hypertrophy                                                    | GO:0014897 | 7.68E-03 | 3.38E-02 | Htr2b,15559:down Lmcd1,30937:up Wisp1,22402:down Errf1,74155:down Igf1,16000:up                                                                                                                                                                                                                         |
| JNK cascade                                                                    | GO:0007254 | 7.78E-03 | 3.42E-02 | Tnf,21926:up Trf,22041:up Sfrp1,20377:up Wnt5a,22418:down Sfrp4,20379:up Il1rn,16181:up Ceacam1,26365:up Sfrp2,20319:up                                                                                                                                                                                 |
| response to vitamin                                                            | GO:0033273 | 7.92E-03 | 3.46E-02 | Vdr,22337:down Gas6,14456:up Postn,50706:down                                                                                                                                                                                                                                                           |
| foam cell differentiation                                                      | GO:0090077 | 7.92E-03 | 3.46E-02 | Pparg,19016:up Lpl,16956:up Adipoq,11450:up                                                                                                                                                                                                                                                             |
| innervation                                                                    | GO:0060384 | 7.92E-03 | 3.46E-02 | Ret,19713:up Sulf1,240725:down Serpine2,20720:up                                                                                                                                                                                                                                                        |
| receptor biosynthetic process                                                  | GO:0032800 | 7.92E-03 | 3.46E-02 | Tnf,21926:up Pparg,19016:up Adipoq,11450:up                                                                                                                                                                                                                                                             |
| positive regulation of myoblast differentiation                                | GO:0045663 | 7.92E-03 | 3.46E-02 | Ccl8,20307:up Cxcl9,17329:up Igf1,16000:up                                                                                                                                                                                                                                                              |
| labyrinthine layer morphogenesis                                               | GO:0060713 | 7.92E-03 | 3.46E-02 | Adm,11535:up Gjb5,14622:down Fgfr2,14183:up                                                                                                                                                                                                                                                             |
| transforming growth factor beta production                                     | GO:0071604 | 7.92E-03 | 3.46E-02 | Cd24a,12484:down Tgfb2,21808:down Ptgs2,19225:down                                                                                                                                                                                                                                                      |
| regulation of interleukin-1 secretion                                          | GO:0050704 | 7.92E-03 | 3.46E-02 | Gas6,14456:up Wnt5a,22418:down Ccl3,20302:up                                                                                                                                                                                                                                                            |
| regulation of insulin-like growth factor receptor signaling pathway            | GO:0043567 | 7.92E-03 | 3.46E-02 | Igf1,16000:up Igf2,16002:up Igf1,16000:up                                                                                                                                                                                                                                                               |
| regulation of intracellular transport                                          | GO:0032386 | 7.94E-03 | 3.47E-02 | Ice1,218333:down Ccl2,20296:up Gas6,14456:up Tnf,21926:up Egfr,13649:down Hmox1,15368:up Cd4,12504:up Bmpr1a,12166:down C1qtnf3,81799:down Ptgs2,19225:down Grem1,23892:up Adipoq,11450:up Bmp4,12159:up Igf1,16000:up Ceacam1,26365:up Sfrp2,20319:up Tgfb2,21808:down                                 |
| protein trimerization                                                          | GO:0070206 | 8.04E-03 | 3.51E-02 | Col1a2,12843:down C1qtnf3,81799:down C1qtnf6,72709:down Adipoq,11450:up                                                                                                                                                                                                                                 |
| blood vessel endothelial cell migration                                        | GO:0043534 | 8.16E-03 | 3.55E-02 | Prl2c2,18811:up Srxp2,68792:down Vegfa,22339:down Ptgs2,19225:down Grem1,23892:up                                                                                                                                                                                                                       |
| positive regulation of axonogenesis                                            | GO:0050772 | 8.16E-03 | 3.55E-02 | Tnfrsf12a,27279:down Crabp2,12904:down Cxcl12,20315:up Vegfa,22339:down Sema7a,20361:down                                                                                                                                                                                                               |

|                                                           |            |          |          |                                                                                                                                                                                                                                                                                                                                                                                                                                                                                                                                                                                                                                                                                                                                                                                                                                                                                                                                                                                                                                                                                                                                                                                                                                                                                                                                                                                                                                                                                                                                                                                                                                                                                                                                                                                                                                                                                                                                                                                                                                                                                                                                                                                                                                                                                                                                                                                                                                                                                                                                                                                                                                                                                                                                                                                                        |
|-----------------------------------------------------------|------------|----------|----------|--------------------------------------------------------------------------------------------------------------------------------------------------------------------------------------------------------------------------------------------------------------------------------------------------------------------------------------------------------------------------------------------------------------------------------------------------------------------------------------------------------------------------------------------------------------------------------------------------------------------------------------------------------------------------------------------------------------------------------------------------------------------------------------------------------------------------------------------------------------------------------------------------------------------------------------------------------------------------------------------------------------------------------------------------------------------------------------------------------------------------------------------------------------------------------------------------------------------------------------------------------------------------------------------------------------------------------------------------------------------------------------------------------------------------------------------------------------------------------------------------------------------------------------------------------------------------------------------------------------------------------------------------------------------------------------------------------------------------------------------------------------------------------------------------------------------------------------------------------------------------------------------------------------------------------------------------------------------------------------------------------------------------------------------------------------------------------------------------------------------------------------------------------------------------------------------------------------------------------------------------------------------------------------------------------------------------------------------------------------------------------------------------------------------------------------------------------------------------------------------------------------------------------------------------------------------------------------------------------------------------------------------------------------------------------------------------------------------------------------------------------------------------------------------------------|
| organic substance metabolic process                       | GO:0071704 | 8.20E-03 | 3.57E-02 | Fstl3,83554:down lgfbp4,16010:up Adm,11535:up Flrt2,399558:down Tfec,21426:up Sfrp4,20379:up Serpinh1,12406:down Lyl1,17095:up Gstt1,14871:up Blvrb,233016:up lgfbp3,16009:up Plk2,20620:down Cd24a,12484:down Mme,17380:up Fkbp14,231997:down Il1rn,16181:up Maob,109731:up Bmp4,12159:up Hps e,15442:up Ptgir,19222:up Fgfr2,14183:up Htr2b,15559:down Ccl6,20305:up Sipi,20568:up Aspn,66695:down Fam132b,227358:down Nabp1,109019:down Mmp2,17390:down Oas3,246727:up Pappa,18491:down Slc40a1,53945:up Egfr,13649:down C1rb,667277:up Tfrc,22042:up Ccl8,20307:up Gstm1,14862:up Serpina3g,20715:up Fam20a,208659:down Aldh1a2,19378:up Ccl2,20296:up Ednrb,13618:up Ampd3,11717:up Mmp13,17386:up Htra3,78558:down Uchl5,56207:up Sord,20322:up Enpp3,209558:down Cdo1,12583:up Dok2,13449:up Mamdc2,71738:down Ptx3,19288:up Ccl4,20303:up Chst11,58250:down Vegfb,22340:up Aldh1a3,56847:down Plpp3,67916:up Mrc2,17534:down Ccl9,20308:up Inhba,16323:down Bnc2,242509:down Tfpi2,21789:down Crff1,12931:down C1s1,50908:up Vegfa,22339:down Gfpt2,14584:down Cbr2,12409:up Serpine2,20720:up Nxn,18230:down lgf2,16002:up Tnf,21926:up Fgfr1,14182:down Lpl,16956:up Sulf1,240725:down Cd4,12504:up Col3a1,12825:down Tbx15,21384:down Serping1,12258:up Uck2,80914:down Enpp1,18605:down Hpgd,15446:up C3,12266:up Enpp5,83965:up Ankrd1,107765:down Cd109,235505:down Ggt5,23887:up Loxl2,94352:down Trf,22041:up Loxl3,16950:down Adam12,11489:down Wnt5a,22418:down Mark1,226778:up Adipoq,11450:up Hal,15109:up lgf1,16000:up Crabp2,12904:down Tgfb2,21808:down F3,14066:up Adamts4,240913:down Kng1,16644:up Prl2c2,18811:up Efemp1,216616:up Saa3,20210:up Gdpd1,66569:up Vdr,22337:down Pdia5,72599:down Fabp4,11770:up Htr2a,15558:down Gas6,14456:up Col11a1,12814:down Sfrp1,20377:up C1qtnf3,81799:down Tgfb3,21814:up Serinc2,230779:down Tll1,21892:down Ceacam1,26365:up Sfrp2,20319:up Pamr1,210622:up Tnfrsf11b,18383:up Prkar2b,19088:up Npnt,114249:up S100a1,20193:up Ic1,218333:down Neur1,214854:down Ccl7,20306:up Pdzn3,55983:down Pdgfc,54635:down Cst7,13011:up Epas1,13819:up Marc1,66112:up Sema7a,20361:down Ddah1,69219:down Fkbp10,14230:down Sdpr,20324:down Npl,74091:up Man2a2,140481:up Akr1c1,105349:up Fabp5,16592:up Ccl12,20293:up Bmpr1a,12166:down Klk1b1,16613:up Tnc,21923:down Gatm,67092:down Ret,19713:up Prg4,96875:down Sdf2l1,64136:up Pdxk,216134:up C1s2,317677:up Creb3l1,26427:down Kitl,17311:up P4ha1,18451:down Hp,15439:up Aoah,27052:up Rasl11a,68895:up Ccl3,20302:up Plat,18791:down Ctla2a,13024:down Adamts12,239337:down Lrrc15,74488:down Anpep,16790:up Pparg,19016:up Lmcd1,30937:up Glp1r,14652:down Hmox1,15368:up Has2,15117:down Ptgs2,19225:down Grem1,23892:up Phf11d,219132:up Col5a1,12831:down Errfi1,74155:down |
| embryonic skeletal system morphogenesis                   | GO:0048704 | 8.29E-03 | 3.60E-02 | Chst11,58250:down Tbx15,21384:down Col11a1,12814:down Tgfb2,21808:down Fgfr2,14183:up Bmp4,12159:up                                                                                                                                                                                                                                                                                                                                                                                                                                                                                                                                                                                                                                                                                                                                                                                                                                                                                                                                                                                                                                                                                                                                                                                                                                                                                                                                                                                                                                                                                                                                                                                                                                                                                                                                                                                                                                                                                                                                                                                                                                                                                                                                                                                                                                                                                                                                                                                                                                                                                                                                                                                                                                                                                                    |
| nephron development                                       | GO:0072006 | 8.29E-03 | 3.60E-02 | Ret,19713:up Sulf1,240725:down Vegfa,22339:down Npnt,114249:up Grem1,23892:up Bmp4,12159:up Adipoq,11450:up                                                                                                                                                                                                                                                                                                                                                                                                                                                                                                                                                                                                                                                                                                                                                                                                                                                                                                                                                                                                                                                                                                                                                                                                                                                                                                                                                                                                                                                                                                                                                                                                                                                                                                                                                                                                                                                                                                                                                                                                                                                                                                                                                                                                                                                                                                                                                                                                                                                                                                                                                                                                                                                                                            |
| positive regulation of stress-activated MAPK cascade      | GO:0032874 | 8.29E-03 | 3.60E-02 | Ceacam1,26365:up Tnf,21926:up Trf,22041:up Wnt5a,22418:down Vegfa,22339:down Tgfb2,21808:down Il1rn,16181:up                                                                                                                                                                                                                                                                                                                                                                                                                                                                                                                                                                                                                                                                                                                                                                                                                                                                                                                                                                                                                                                                                                                                                                                                                                                                                                                                                                                                                                                                                                                                                                                                                                                                                                                                                                                                                                                                                                                                                                                                                                                                                                                                                                                                                                                                                                                                                                                                                                                                                                                                                                                                                                                                                           |
| regulation of cellular response to stress                 | GO:0080135 | 8.34E-03 | 3.61E-02 | Hp,15439:up Sfrp4,20379:up Ankrd1,107765:down Cxcl12,20315:up Vegfa,22339:down Tnf,21926:up Trf,22041:up Egfr,13649:down Hmox1,15368:up Sfrp1,20377:up Bmpr1a,12166:down Wnt5a,22418:down Il1rn,16181:up Ceacam1,26365:up Sfrp2,20319:up Sdf2l1,64136:up Tgfb2,21808:down Creb3l1,26427:down                                                                                                                                                                                                                                                                                                                                                                                                                                                                                                                                                                                                                                                                                                                                                                                                                                                                                                                                                                                                                                                                                                                                                                                                                                                                                                                                                                                                                                                                                                                                                                                                                                                                                                                                                                                                                                                                                                                                                                                                                                                                                                                                                                                                                                                                                                                                                                                                                                                                                                           |
| regulation of axonogenesis                                | GO:0050770 | 8.36E-03 | 3.61E-02 | Plxnd1,67784:up Wnt5a,22418:down Sema7a,20361:down Tnfrsf12a,27279:down Crabp2,12904:down Ret,19713:up Cxcl12,20315:up Vegfa,22339:down                                                                                                                                                                                                                                                                                                                                                                                                                                                                                                                                                                                                                                                                                                                                                                                                                                                                                                                                                                                                                                                                                                                                                                                                                                                                                                                                                                                                                                                                                                                                                                                                                                                                                                                                                                                                                                                                                                                                                                                                                                                                                                                                                                                                                                                                                                                                                                                                                                                                                                                                                                                                                                                                |
| lung lobe development                                     | GO:0060462 | 8.49E-03 | 3.61E-02 | Fgfr2,14183:up lgf1,16000:up                                                                                                                                                                                                                                                                                                                                                                                                                                                                                                                                                                                                                                                                                                                                                                                                                                                                                                                                                                                                                                                                                                                                                                                                                                                                                                                                                                                                                                                                                                                                                                                                                                                                                                                                                                                                                                                                                                                                                                                                                                                                                                                                                                                                                                                                                                                                                                                                                                                                                                                                                                                                                                                                                                                                                                           |
| cell-cell adhesion mediated by integrin                   | GO:0033631 | 8.49E-03 | 3.61E-02 | Cd24a,12484:down Npnt,114249:up                                                                                                                                                                                                                                                                                                                                                                                                                                                                                                                                                                                                                                                                                                                                                                                                                                                                                                                                                                                                                                                                                                                                                                                                                                                                                                                                                                                                                                                                                                                                                                                                                                                                                                                                                                                                                                                                                                                                                                                                                                                                                                                                                                                                                                                                                                                                                                                                                                                                                                                                                                                                                                                                                                                                                                        |
| positive regulation of fever generation                   | GO:0031622 | 8.49E-03 | 3.61E-02 | Tnf,21926:up Ptgs2,19225:down                                                                                                                                                                                                                                                                                                                                                                                                                                                                                                                                                                                                                                                                                                                                                                                                                                                                                                                                                                                                                                                                                                                                                                                                                                                                                                                                                                                                                                                                                                                                                                                                                                                                                                                                                                                                                                                                                                                                                                                                                                                                                                                                                                                                                                                                                                                                                                                                                                                                                                                                                                                                                                                                                                                                                                          |
| response to follicle-stimulating hormone                  | GO:0032354 | 8.49E-03 | 3.61E-02 | Inhba,16323:down Tgfb3,21814:up                                                                                                                                                                                                                                                                                                                                                                                                                                                                                                                                                                                                                                                                                                                                                                                                                                                                                                                                                                                                                                                                                                                                                                                                                                                                                                                                                                                                                                                                                                                                                                                                                                                                                                                                                                                                                                                                                                                                                                                                                                                                                                                                                                                                                                                                                                                                                                                                                                                                                                                                                                                                                                                                                                                                                                        |
| negative regulation of glial cell apoptotic process       | GO:0034351 | 8.49E-03 | 3.61E-02 | Gas6,14456:up Ccl12,20293:up                                                                                                                                                                                                                                                                                                                                                                                                                                                                                                                                                                                                                                                                                                                                                                                                                                                                                                                                                                                                                                                                                                                                                                                                                                                                                                                                                                                                                                                                                                                                                                                                                                                                                                                                                                                                                                                                                                                                                                                                                                                                                                                                                                                                                                                                                                                                                                                                                                                                                                                                                                                                                                                                                                                                                                           |
| Wnt signaling pathway involved in somitogenesis           | GO:0090244 | 8.49E-03 | 3.61E-02 | Sfrp2,20319:up Sfrp1,20377:up                                                                                                                                                                                                                                                                                                                                                                                                                                                                                                                                                                                                                                                                                                                                                                                                                                                                                                                                                                                                                                                                                                                                                                                                                                                                                                                                                                                                                                                                                                                                                                                                                                                                                                                                                                                                                                                                                                                                                                                                                                                                                                                                                                                                                                                                                                                                                                                                                                                                                                                                                                                                                                                                                                                                                                          |
| negative regulation of osteoblast proliferation           | GO:0033689 | 8.49E-03 | 3.61E-02 | Sfrp1,20377:up Grem1,23892:up                                                                                                                                                                                                                                                                                                                                                                                                                                                                                                                                                                                                                                                                                                                                                                                                                                                                                                                                                                                                                                                                                                                                                                                                                                                                                                                                                                                                                                                                                                                                                                                                                                                                                                                                                                                                                                                                                                                                                                                                                                                                                                                                                                                                                                                                                                                                                                                                                                                                                                                                                                                                                                                                                                                                                                          |
| negative regulation by host of viral process              | GO:0044793 | 8.49E-03 | 3.61E-02 | Ceacam1,26365:up Ptx3,19288:up                                                                                                                                                                                                                                                                                                                                                                                                                                                                                                                                                                                                                                                                                                                                                                                                                                                                                                                                                                                                                                                                                                                                                                                                                                                                                                                                                                                                                                                                                                                                                                                                                                                                                                                                                                                                                                                                                                                                                                                                                                                                                                                                                                                                                                                                                                                                                                                                                                                                                                                                                                                                                                                                                                                                                                         |
| negative regulation of fibroblast apoptotic process       | GO:2000270 | 8.49E-03 | 3.61E-02 | Gas6,14456:up Sfrp1,20377:up                                                                                                                                                                                                                                                                                                                                                                                                                                                                                                                                                                                                                                                                                                                                                                                                                                                                                                                                                                                                                                                                                                                                                                                                                                                                                                                                                                                                                                                                                                                                                                                                                                                                                                                                                                                                                                                                                                                                                                                                                                                                                                                                                                                                                                                                                                                                                                                                                                                                                                                                                                                                                                                                                                                                                                           |
| glomerular visceral epithelial cell development           | GO:0072015 | 8.49E-03 | 3.61E-02 | Bmp4,12159:up Adipoq,11450:up                                                                                                                                                                                                                                                                                                                                                                                                                                                                                                                                                                                                                                                                                                                                                                                                                                                                                                                                                                                                                                                                                                                                                                                                                                                                                                                                                                                                                                                                                                                                                                                                                                                                                                                                                                                                                                                                                                                                                                                                                                                                                                                                                                                                                                                                                                                                                                                                                                                                                                                                                                                                                                                                                                                                                                          |
| negative regulation of heterotypic cell-cell adhesion     | GO:0034115 | 8.49E-03 | 3.61E-02 | Il1rn,16181:up Adipoq,11450:up                                                                                                                                                                                                                                                                                                                                                                                                                                                                                                                                                                                                                                                                                                                                                                                                                                                                                                                                                                                                                                                                                                                                                                                                                                                                                                                                                                                                                                                                                                                                                                                                                                                                                                                                                                                                                                                                                                                                                                                                                                                                                                                                                                                                                                                                                                                                                                                                                                                                                                                                                                                                                                                                                                                                                                         |
| olfactory bulb interneuron development                    | GO:0021891 | 8.49E-03 | 3.61E-02 | Fgfr1,14182:down Wnt5a,22418:down                                                                                                                                                                                                                                                                                                                                                                                                                                                                                                                                                                                                                                                                                                                                                                                                                                                                                                                                                                                                                                                                                                                                                                                                                                                                                                                                                                                                                                                                                                                                                                                                                                                                                                                                                                                                                                                                                                                                                                                                                                                                                                                                                                                                                                                                                                                                                                                                                                                                                                                                                                                                                                                                                                                                                                      |
| cranial suture morphogenesis                              | GO:0060363 | 8.49E-03 | 3.61E-02 | Fgfr2,14183:up Bmp4,12159:up                                                                                                                                                                                                                                                                                                                                                                                                                                                                                                                                                                                                                                                                                                                                                                                                                                                                                                                                                                                                                                                                                                                                                                                                                                                                                                                                                                                                                                                                                                                                                                                                                                                                                                                                                                                                                                                                                                                                                                                                                                                                                                                                                                                                                                                                                                                                                                                                                                                                                                                                                                                                                                                                                                                                                                           |
| regulation of activation-induced cell death of T cells    | GO:0070235 | 8.49E-03 | 3.61E-02 | Ceacam1,26365:up Tgfb2,21808:down                                                                                                                                                                                                                                                                                                                                                                                                                                                                                                                                                                                                                                                                                                                                                                                                                                                                                                                                                                                                                                                                                                                                                                                                                                                                                                                                                                                                                                                                                                                                                                                                                                                                                                                                                                                                                                                                                                                                                                                                                                                                                                                                                                                                                                                                                                                                                                                                                                                                                                                                                                                                                                                                                                                                                                      |
| regulation of cell-cell adhesion involved in gastrulation | GO:0070587 | 8.49E-03 | 3.61E-02 | Il1rn,16181:up Adipoq,11450:up                                                                                                                                                                                                                                                                                                                                                                                                                                                                                                                                                                                                                                                                                                                                                                                                                                                                                                                                                                                                                                                                                                                                                                                                                                                                                                                                                                                                                                                                                                                                                                                                                                                                                                                                                                                                                                                                                                                                                                                                                                                                                                                                                                                                                                                                                                                                                                                                                                                                                                                                                                                                                                                                                                                                                                         |

|                                                                          |            |          |          |                                                                                                                                                                                                                |
|--------------------------------------------------------------------------|------------|----------|----------|----------------------------------------------------------------------------------------------------------------------------------------------------------------------------------------------------------------|
| gastro-intestinal system smooth muscle contraction                       | GO:0014831 | 8.49E-03 | 3.61E-02 | Htr2b,15559:down Sulf1,240725:down                                                                                                                                                                             |
| positive regulation of macrophage cytokine production                    | GO:0060907 | 8.49E-03 | 3.61E-02 | Wnt5a,22418:down Sema7a,20361:down                                                                                                                                                                             |
| negative regulation of granulocyte differentiation                       | GO:0030853 | 8.49E-03 | 3.61E-02 | Ceacam1,26365:up Adipoq,11450:up                                                                                                                                                                               |
| astrocyte cell migration                                                 | GO:0043615 | 8.49E-03 | 3.61E-02 | Ccl12,20293:up Ccl3,20302:up                                                                                                                                                                                   |
| negative regulation of mesenchymal cell proliferation                    | GO:0072201 | 8.49E-03 | 3.61E-02 | Wnt5a,22418:down Bmp4,12159:up                                                                                                                                                                                 |
| lung lobe morphogenesis                                                  | GO:0060463 | 8.49E-03 | 3.61E-02 | Fgfr2,14183:up Igf1,16000:up                                                                                                                                                                                   |
| glomerular epithelial cell development                                   | GO:0072310 | 8.49E-03 | 3.61E-02 | Bmp4,12159:up Adipoq,11450:up                                                                                                                                                                                  |
| positive regulation of calcineurin-NFAT signaling cascade                | GO:0070886 | 8.49E-03 | 3.61E-02 | Lmcd1,30937:up Igf1,16000:up                                                                                                                                                                                   |
| positive regulation of chemokine biosynthetic process                    | GO:0045080 | 8.49E-03 | 3.61E-02 | Tnf,21926:up Wnt5a,22418:down                                                                                                                                                                                  |
| low-density lipoprotein particle receptor biosynthetic process           | GO:0045713 | 8.49E-03 | 3.61E-02 | Pparg,19016:up Adipoq,11450:up                                                                                                                                                                                 |
| positive regulation of protein kinase C signaling                        | GO:0090037 | 8.49E-03 | 3.61E-02 | Wnt5a,22418:down Vegfa,22339:down                                                                                                                                                                              |
| hormone secretion                                                        | GO:0046879 | 8.58E-03 | 3.65E-02 | Tnf,21926:up Pparg,19016:up Glp1r,14652:down Adm,11535:up Fgfr1,14182:down Egfr,13649:down Sfrp1,20377:up C1qtnf3,81799:down Inhba,16323:down Il1rn,16181:up Adipoq,11450:up Htr2a,15558:down                  |
| positive regulation of stress-activated protein kinase signaling cascade | GO:0070304 | 8.64E-03 | 3.67E-02 | Ceacam1,26365:up Tnf,21926:up Trf,22041:up Wnt5a,22418:down Vegfa,22339:down Tgfb2,21808:down Il1rn,16181:up                                                                                                   |
| muscle hypertrophy                                                       | GO:0014896 | 8.66E-03 | 3.67E-02 | Htr2b,15559:down Lmcd1,30937:up Wisp1,22402:down Errfi1,74155:down Igf1,16000:up                                                                                                                               |
| lymphocyte apoptotic process                                             | GO:0070227 | 8.66E-03 | 3.67E-02 | Ceacam1,26365:up Cd24a,12484:down Wnt5a,22418:down Tgfb2,21808:down Bmp4,12159:up                                                                                                                              |
| negative regulation of stem cell differentiation                         | GO:2000737 | 8.70E-03 | 3.68E-02 | Sfrp2,20319:up Sfrp1,20377:up Tgfb2,21808:down Tgfb3,21814:up                                                                                                                                                  |
| developmental programmed cell death                                      | GO:0010623 | 8.70E-03 | 3.68E-02 | Vdr,22337:down Tgfb2,21808:down Tgfb3,21814:up Kitl,17311:up                                                                                                                                                   |
| nucleocytoplasmic transport                                              | GO:0006913 | 8.90E-03 | 3.76E-02 | Tnf,21926:up Gas6,14456:up Akr1c18,105349:up Egfr,13649:down C1qtnf3,81799:down Bmpr1a,12166:down Ptgs2,19225:down Grem1,23892:up Igf1,16000:up Bmp4,12159:up Ceacam1,26365:up Sfrp2,20319:up Tgfb2,21808:down |
| endodermal cell differentiation                                          | GO:0035987 | 8.93E-03 | 3.76E-02 | Col5a2,12832:down Col5a1,12831:down Inhba,16323:down                                                                                                                                                           |
| regulation of glucan biosynthetic process                                | GO:0010962 | 8.93E-03 | 3.76E-02 | Enpp1,18605:down Igf2,16002:up Igf1,16000:up                                                                                                                                                                   |
| regulation of phospholipase C activity                                   | GO:1900274 | 8.93E-03 | 3.76E-02 | Htr2b,15559:down Fgfr1,14182:down Htr2a,15558:down                                                                                                                                                             |
| chondroitin sulfate proteoglycan metabolic process                       | GO:0050654 | 8.93E-03 | 3.76E-02 | Mamdc2,71738:down Chst11,58250:down Igf1,16000:up                                                                                                                                                              |
| regulation of glycogen biosynthetic process                              | GO:0005979 | 8.93E-03 | 3.76E-02 | Enpp1,18605:down Igf2,16002:up Igf1,16000:up                                                                                                                                                                   |
| dopamine secretion                                                       | GO:0014046 | 8.93E-03 | 3.76E-02 | Cxcl12,20315:up Htr2a,15558:down Sncg,20618:up                                                                                                                                                                 |
| regulation of dopamine secretion                                         | GO:0014059 | 8.93E-03 | 3.76E-02 | Cxcl12,20315:up Htr2a,15558:down Sncg,20618:up                                                                                                                                                                 |
| regulation of branching involved in ureteric bud morphogenesis           | GO:0090189 | 8.93E-03 | 3.76E-02 | Vegfa,22339:down Grem1,23892:up Bmp4,12159:up                                                                                                                                                                  |
| positive regulation of blood circulation                                 | GO:1903524 | 9.12E-03 | 3.83E-02 | Glp1r,14652:down Adm,11535:up Egfr,13649:down Tgfb2,21808:down Htr2a,15558:down Ptgs2,19225:down                                                                                                               |
| negative regulation of apoptotic signaling pathway                       | GO:2001234 | 9.13E-03 | 3.83E-02 | Tnf,21926:up Tnfrsf23,79201:down Hmox1,15368:up Igf1,16000:up Bmp4,12159:up Sfrp2,20319:up Cxcl12,20315:up Cx3cr1,13051:down Creb3l1,26427:down                                                                |
| intracellular receptor signaling pathway                                 | GO:0030522 | 9.31E-03 | 3.91E-02 | Pparg,19016:up Akr1c18,105349:up Sfrp1,20377:up Aldh1a2,19378:up Igf1,16000:up Vdr,22337:down Crabp2,12904:down Aldh1a3,56847:down                                                                             |
| positive regulation of lipid metabolic process                           | GO:0045834 | 9.37E-03 | 3.93E-02 | Htr2b,15559:down Tnf,21926:up Pparg,19016:up Htr2a,15558:down Igf2,16002:up Igf1,16000:up Adipoq,11450:up                                                                                                      |
| terpenoid metabolic process                                              | GO:0006721 | 9.40E-03 | 3.93E-02 | Crabp2,12904:down Akr1c18,105349:up Aldh1a2,19378:up Aldh1a3,56847:down                                                                                                                                        |
| cellular polysaccharide biosynthetic process                             | GO:0033692 | 9.40E-03 | 3.93E-02 | Has2,15117:down Enpp1,18605:down Igf2,16002:up Igf1,16000:up                                                                                                                                                   |

|                                                                                         |            |          |          |                                                                                                                                                                                                                                                                                                                                                                                                                                          |
|-----------------------------------------------------------------------------------------|------------|----------|----------|------------------------------------------------------------------------------------------------------------------------------------------------------------------------------------------------------------------------------------------------------------------------------------------------------------------------------------------------------------------------------------------------------------------------------------------|
| positive regulation of pathway-restricted SMAD protein phosphorylation                  | GO:0010862 | 9.40E-03 | 3.93E-02 | Tgfb2,21808:down Inhba,16323:down Bmpr1a,12166:down Bmp4,12159:up                                                                                                                                                                                                                                                                                                                                                                        |
| nuclear transport                                                                       | GO:0051169 | 9.53E-03 | 3.99E-02 | Tnf,21926:up Gas6,14456:up Akr1c18,105349:up Egfr,13649:down C1qtnf3,81799:down Bmpr1a,12166:down Ptgs2,19225:down Grem1,23892:up Igf1,16000:up Bmp4,12159:up Ceacam1,26365:up Sfrp2,20319:up Tgfb2,21808:down                                                                                                                                                                                                                           |
| negative regulation of cell morphogenesis involved in differentiation                   | GO:0010771 | 9.56E-03 | 4.00E-02 | Sfrp2,20319:up Sfrp1,20377:up Postn,50706:down Wnt5a,22418:down Tgfb2,21808:down Tgfb3,21814:up                                                                                                                                                                                                                                                                                                                                          |
| heart contraction                                                                       | GO:0060047 | 9.64E-03 | 4.03E-02 | Glp1r,14652:down Fxyd1,56188:up Adm,11535:up Stc1,20855:up Epas1,13819:up Vegfb,22340:up Tgfb2,21808:down S100a1,20193:up                                                                                                                                                                                                                                                                                                                |
| cell activation                                                                         | GO:0001775 | 9.73E-03 | 4.05E-02 | Ly9,17085:up Ccl2,20296:up Ctla2a,13024:down Lyl1,17095:up Cxcl12,20315:up Cx3cr1,13051:down Serpine2,20720:up Igf2,16002:up Gas6,14456:up Tnf,21926:up Egfr,13649:down Cd24a,12484:down Hmox1,15368:up Sfrp1,20377:up Wnt5a,22418:down Cd4,12504:up Tfrc,22042:up Bmp4,12159:up Igf1,16000:up Ceacam1,26365:up Il1r1,17082:down Clec4e,56619:up Tnfsf9,21950:up                                                                         |
| extrinsic apoptotic signaling pathway via death domain receptors                        | GO:0008625 | 9.73E-03 | 4.05E-02 | Tnf,21926:up Sfrp2,20319:up Tnfrsf23,79201:down Sfrp1,20377:up Hmox1,15368:up                                                                                                                                                                                                                                                                                                                                                            |
| cellular hormone metabolic process                                                      | GO:0034754 | 9.73E-03 | 4.05E-02 | Crabp2,12904:down Akr1c18,105349:up Adm,11535:up Aldh1a2,19378:up Aldh1a3,56847:down                                                                                                                                                                                                                                                                                                                                                     |
| hormone transport                                                                       | GO:0009914 | 9.95E-03 | 4.12E-02 | Tnf,21926:up Pparg,19016:up Glp1r,14652:down Adm,11535:up Fgfr1,14182:down Egfr,13649:down Sfrp1,20377:up C1qtnf3,81799:down Inhba,16323:down Il1rn,16181:up Adipoq,11450:up Htr2a,15558:down                                                                                                                                                                                                                                            |
| regulation of canonical Wnt signaling pathway                                           | GO:0060828 | 9.98E-03 | 4.12E-02 | Cthrc1,68588:down Sfrp1,20377:up Wnt5a,22418:down Sfrp4,20379:up Grem1,23892:up Sfrp2,20319:up Rspo2,239405:up Fgfr2,14183:up                                                                                                                                                                                                                                                                                                            |
| response to hypoxia                                                                     | GO:0001666 | 9.98E-03 | 4.12E-02 | Loxl2,94352:down Cd24a,12484:down Hmox1,15368:up Plat,18791:down Epas1,13819:up Tgfb2,21808:down Vegfa,22339:down Mmp2,17390:down                                                                                                                                                                                                                                                                                                        |
| leukocyte cell-cell adhesion                                                            | GO:0007159 | 1.00E-02 | 4.12E-02 | Tnf,21926:up Cd24a,12484:down Ly9,17085:up Has2,15117:down Ccl2,20296:up Cd4,12504:up Tfrc,22042:up Igf1,16000:up Bmp4,12159:up Ctla2a,13024:down Ceacam1,26365:up Cxcl12,20315:up Igf2,16002:up Clec4e,56619:up Tnfsf9,21950:up                                                                                                                                                                                                         |
| regulation of excretion                                                                 | GO:0044062 | 1.00E-02 | 4.12E-02 | Stc1,20855:up Ednrb,13618:up Anpep,16790:up                                                                                                                                                                                                                                                                                                                                                                                              |
| positive regulation of syncytium formation by plasma membrane fusion                    | GO:0060143 | 1.00E-02 | 4.12E-02 | Ccl8,20307:up Cxcl9,17329:up Cxcl12,20315:up                                                                                                                                                                                                                                                                                                                                                                                             |
| monocyte differentiation                                                                | GO:0030224 | 1.00E-02 | 4.12E-02 | Pparg,19016:up Vegfa,22339:down Bmp4,12159:up                                                                                                                                                                                                                                                                                                                                                                                            |
| positive regulation of epithelial cell apoptotic process                                | GO:1904037 | 1.00E-02 | 4.12E-02 | Akr1c18,105349:up Sfrp4,20379:up Bmp4,12159:up                                                                                                                                                                                                                                                                                                                                                                                           |
| regulation of vascular endothelial growth factor receptor signaling pathway             | GO:0030947 | 1.00E-02 | 4.12E-02 | Vegfa,22339:down Figf,14205:up Bmp4,12159:up                                                                                                                                                                                                                                                                                                                                                                                             |
| negative regulation of extrinsic apoptotic signaling pathway via death domain receptors | GO:1902042 | 1.00E-02 | 4.12E-02 | Sfrp2,20319:up Tnfrsf23,79201:down Hmox1,15368:up                                                                                                                                                                                                                                                                                                                                                                                        |
| regulation of inflammatory response to antigenic stimulus                               | GO:0002861 | 1.00E-02 | 4.12E-02 | Tnf,21926:up Cd24a,12484:down C3,12266:up                                                                                                                                                                                                                                                                                                                                                                                                |
| positive regulation of acute inflammatory response                                      | GO:0002675 | 1.00E-02 | 4.12E-02 | Tnf,21926:up C3,12266:up Ptgs2,19225:down                                                                                                                                                                                                                                                                                                                                                                                                |
| isoprenoid biosynthetic process                                                         | GO:0008299 | 1.00E-02 | 4.12E-02 | Akr1c18,105349:up Aldh1a2,19378:up Aldh1a3,56847:down                                                                                                                                                                                                                                                                                                                                                                                    |
| regulation of mesonephros development                                                   | GO:0061217 | 1.00E-02 | 4.12E-02 | Vegfa,22339:down Grem1,23892:up Bmp4,12159:up                                                                                                                                                                                                                                                                                                                                                                                            |
| organismal catabolic process                                                            | GO:0044243 | 1.00E-02 | 4.12E-02 | Mmp2,17390:down Mmp13,17386:up Mrc2,17534:down                                                                                                                                                                                                                                                                                                                                                                                           |
| positive regulation of steroid biosynthetic process                                     | GO:0010893 | 1.00E-02 | 4.12E-02 | Tnf,21926:up Igf2,16002:up Igf1,16000:up                                                                                                                                                                                                                                                                                                                                                                                                 |
| positive regulation of neuroblast proliferation                                         | GO:0002052 | 1.00E-02 | 4.12E-02 | Prl2c2,18811:up Vegfa,22339:down Cx3cr1,13051:down                                                                                                                                                                                                                                                                                                                                                                                       |
| regulation of hormone biosynthetic process                                              | GO:0046885 | 1.00E-02 | 4.12E-02 | Akr1c18,105349:up Igf2,16002:up Igf1,16000:up                                                                                                                                                                                                                                                                                                                                                                                            |
| carbohydrate derivative metabolic process                                               | GO:1901135 | 1.01E-02 | 4.14E-02 | Htr2b,15559:down Adm,11535:up Aoah,27052:up Ampd3,11717:up Vegfa,22339:down Htr2a,15558:down Gfpt2,14584:down Npl,74091:up Adams12,239337:down Man2a2,140481:up Mamdc2,71738:down Ptx3,19288:up Akr1c18,105349:up Col11a1,12814:down Has2,15117:down Sulf1,240725:down Wnt5a,22418:down Serinc2,230779:down Igf1,16000:up Chst11,58250:down Vegfb,22340:up Hpse,15442:up Sdf2l1,64136:up Ptgir,19222:up Uck2,80914:down Enpp1,18605:down |
| aorta development                                                                       | GO:0035904 | 1.01E-02 | 4.15E-02 | Plxnd1,67784:up Tgfb2,21808:down Bmpr1a,12166:down Col3a1,12825:down                                                                                                                                                                                                                                                                                                                                                                     |



|                                                                                |            |          |          |                                                                                                                                                                                         |
|--------------------------------------------------------------------------------|------------|----------|----------|-----------------------------------------------------------------------------------------------------------------------------------------------------------------------------------------|
| positive regulation of lipase activity                                         | GO:0060193 | 1.01E-02 | 4.15E-02 | Htr2b,15559:down Fgfr1,14182:down Htr2a,15558:down Fgfr2,14183:up                                                                                                                       |
| lung epithelium development                                                    | GO:0060428 | 1.01E-02 | 4.15E-02 | Errfi1,74155:down Fgfr2,14183:up lgf1,16000:up Bmp4,12159:up                                                                                                                            |
| positive regulation of smooth muscle cell migration                            | GO:0014911 | 1.01E-02 | 4.15E-02 | Has2,15117:down Postn,50706:down F3,14066:up lgf1,16000:up                                                                                                                              |
| negative regulation of fat cell differentiation                                | GO:0045599 | 1.01E-02 | 4.15E-02 | Wnt5a,22418:down Vegfa,22339:down Enpp1,18605:down Adipoq,11450:up                                                                                                                      |
| regulation of multicellular organismal metabolic process                       | GO:0044246 | 1.01E-02 | 4.15E-02 | Pparg,19016:up Ccl2,20296:up Errfi1,74155:down Bmp4,12159:up                                                                                                                            |
| protein import into nucleus, translocation                                     | GO:000060  | 1.01E-02 | 4.15E-02 | Tnf,21926:up Gas6,14456:up Akr1c18,105349:up lgf1,16000:up                                                                                                                              |
| regulation of heart contraction                                                | GO:0008016 | 1.01E-02 | 4.15E-02 | Glp1r,14652:down Fxyd1,56188:up Adm,11535:up Tgfb2,21808:down Stc1,20855:up S100a1,20193:up Epas1,13819:up                                                                              |
| regulation of glucose transport                                                | GO:0010827 | 1.03E-02 | 4.21E-02 | Tnf,21926:up C3,12266:up Enpp1,18605:down lgf1,16000:up Adipoq,11450:up                                                                                                                 |
| neural tube development                                                        | GO:0021915 | 1.03E-02 | 4.22E-02 | Cthrc1,68588:down Adm,11535:up Sfrp1,20377:up Ptk7,71461:down Wnt5a,22418:down Aldh1a2,19378:up Bmp4,12159:up Sfrp2,20319:up                                                            |
| regulation of cell size                                                        | GO:0008361 | 1.03E-02 | 4.22E-02 | Plxnd1,67784:up Wnt5a,22418:down Sema7a,20361:down Tnfrsf12a,27279:down Crabp2,12904:down Ret,19713:up Cxcl12,20315:up Vegfa,22339:down                                                 |
| synapse organization                                                           | GO:0050808 | 1.03E-02 | 4.22E-02 | Frt2,399558:down Plxnd1,67784:up Wnt5a,22418:down Pdzn3,55983:down Sncg,20618:up Srpx2,68792:down Tnc,21923:down Fgfr2,14183:up Thbs2,21826:down                                        |
| glycoprotein metabolic process                                                 | GO:0009100 | 1.05E-02 | 4.28E-02 | Mamdc2,71738:down Ptx3,19288:up Col11a1,12814:down Sulf1,240725:down lgf1,16000:up Chst11,58250:down Hpse,15442:up Vegfb,22340:up Sdf2l1,64136:up Adamts12,239337:down Man2a2,140481:up |
| Rap protein signal transduction                                                | GO:0032486 | 1.06E-02 | 4.31E-02 | Plk2,20620:down Ccl9,20308:up Ccl6,20305:up Wnt5a,22418:down Ccl7,20306:up Ccl2,20296:up Ccl12,20293:up Ccl4,20303:up Ccl3,20302:up Ccl8,20307:up                                       |
| heart process                                                                  | GO:0003015 | 1.07E-02 | 4.33E-02 | Glp1r,14652:down Fxyd1,56188:up Adm,11535:up Stc1,20855:up Epas1,13819:up Vegfb,22340:up Tgfb2,21808:down S100a1,20193:up                                                               |
| regulation of glial cell apoptotic process                                     | GO:0034350 | 1.08E-02 | 4.33E-02 | Gas6,14456:up Ccl12,20293:up                                                                                                                                                            |
| positive regulation of steroid hormone biosynthetic process                    | GO:0090031 | 1.08E-02 | 4.33E-02 | lgf2,16002:up lgf1,16000:up                                                                                                                                                             |
| forebrain neuroblast division                                                  | GO:0021873 | 1.08E-02 | 4.33E-02 | Fgfr1,14182:down Fgfr2,14183:up                                                                                                                                                         |
| mammary gland formation                                                        | GO:0060592 | 1.08E-02 | 4.33E-02 | Fgfr2,14183:up Bmp4,12159:up                                                                                                                                                            |
| vitamin D biosynthetic process                                                 | GO:0042368 | 1.08E-02 | 4.33E-02 | Vdr,22337:down Tnf,21926:up                                                                                                                                                             |
| negative regulation of macrophage derived foam cell differentiation            | GO:0010745 | 1.08E-02 | 4.33E-02 | Pparg,19016:up Adipoq,11450:up                                                                                                                                                          |
| regulation of vitamin D biosynthetic process                                   | GO:0060556 | 1.08E-02 | 4.33E-02 | Vdr,22337:down Tnf,21926:up                                                                                                                                                             |
| negative regulation of collagen metabolic process                              | GO:0010713 | 1.08E-02 | 4.33E-02 | Pparg,19016:up Errfi1,74155:down                                                                                                                                                        |
| negative regulation of collagen biosynthetic process                           | GO:0032966 | 1.08E-02 | 4.33E-02 | Pparg,19016:up Errfi1,74155:down                                                                                                                                                        |
| negative regulation of vascular permeability                                   | GO:0043116 | 1.08E-02 | 4.33E-02 | Ceacam1,26365:up Adm,11535:up                                                                                                                                                           |
| positive regulation of cell growth involved in cardiac muscle cell development | GO:0061051 | 1.08E-02 | 4.33E-02 | Wisp1,22402:down lgf1,16000:up                                                                                                                                                          |
| endothelial cell proliferation involved in sprouting angiogenesis              | GO:0002043 | 1.08E-02 | 4.33E-02 | Vegfa,22339:down Bmp4,12159:up                                                                                                                                                          |
| involved in angiogenesis                                                       | GO:0070586 | 1.08E-02 | 4.33E-02 | Il1rn,16181:up Adipoq,11450:up                                                                                                                                                          |
| negative regulation of interleukin-6 secretion                                 | GO:1900165 | 1.08E-02 | 4.33E-02 | Gas6,14456:up C1qtnf3,81799:down                                                                                                                                                        |
| positive regulation of catenin import into nucleus                             | GO:0035413 | 1.08E-02 | 4.33E-02 | Sfrp2,20319:up Egfr,13649:down                                                                                                                                                          |
| establishment of epithelial cell apical/basal polarity                         | GO:0045198 | 1.08E-02 | 4.33E-02 | Ptk7,71461:down Wnt5a,22418:down                                                                                                                                                        |
| positive regulation of NFAT protein import into nucleus                        | GO:0051533 | 1.08E-02 | 4.33E-02 | Ceacam1,26365:up Tnf,21926:up                                                                                                                                                           |
| cellular response to X-ray                                                     | GO:0071481 | 1.08E-02 | 4.33E-02 | Sfrp2,20319:up Sfrp1,20377:up                                                                                                                                                           |

|                                                                                                                                                  |            |          |          |                                                                                                                                                                                                                                                                                                                                                                                                                                                                                                                                                                                                                                                              |
|--------------------------------------------------------------------------------------------------------------------------------------------------|------------|----------|----------|--------------------------------------------------------------------------------------------------------------------------------------------------------------------------------------------------------------------------------------------------------------------------------------------------------------------------------------------------------------------------------------------------------------------------------------------------------------------------------------------------------------------------------------------------------------------------------------------------------------------------------------------------------------|
| regulation of neurological system process                                                                                                        | GO:0031644 | 1.09E-02 | 4.36E-02 | Tnf,21926:up Trf,22041:up Fgfr1,14182:down Ncam1,17967:down Ednrb,13618:up                                                                                                                                                                                                                                                                                                                                                                                                                                                                                                                                                                                   |
| positive regulation of lipid biosynthetic process                                                                                                | GO:0046889 | 1.09E-02 | 4.36E-02 | Htr2b,15559:down Tnf,21926:up Htr2a,15558:down lgf2,16002:up lgf1,16000:up                                                                                                                                                                                                                                                                                                                                                                                                                                                                                                                                                                                   |
| odontogenesis of dentin-containing tooth                                                                                                         | GO:0042475 | 1.09E-02 | 4.36E-02 | Bmpr1a,12166:down Rspo2,239405:up Fam20a,208659:down Tnfrsf11b,18383:up Bmp4,12159:up                                                                                                                                                                                                                                                                                                                                                                                                                                                                                                                                                                        |
| response to nutrient                                                                                                                             | GO:0007584 | 1.09E-02 | 4.36E-02 | Vdr,22337:down Gas6,14456:up Gatm,67092:down Postn,50706:down                                                                                                                                                                                                                                                                                                                                                                                                                                                                                                                                                                                                |
| T cell apoptotic process                                                                                                                         | GO:0070231 | 1.09E-02 | 4.36E-02 | Ceacam1,26365:up Wnt5a,22418:down Tgfb2,21808:down Bmp4,12159:up                                                                                                                                                                                                                                                                                                                                                                                                                                                                                                                                                                                             |
| multi-organism process                                                                                                                           | GO:0051704 | 1.09E-02 | 4.37E-02 | Adm,11535:up Hpgd,15446:up Mrc1,17533:up Ccl2,20296:up Ednrb,13618:up lfit3,15959:up Ankrd1,107765:down Clec4n,56620:up Akr1c18,105349:up Ptx3,19288:up Cd24a,12484:down Wnt5a,22418:down Ccl12,20293:up Ccl4,20303:up Bmp4,12159:up lgf1,16000:up Cxc19,17329:up Oas1,231655:up lfit1,15957:up Ptgir,19222:up Clec4e,56619:up Kitl,17311:up Adamts4,240913:down Hp,15439:up Inhba,16323:down Slpi,20568:up Plat,18791:down Vdr,22337:down Cxc12,20315:up Mmp2,17390:down Serpine2,20720:up Lrrc15,74488:down Oas3,246727:up Gas6,14456:up Tnf,21926:up Lmcd1,30937:up Cd4,12504:up Ptgs2,19225:down Ceacam1,26365:up Tnfrsf11b,18383:up                     |
| positive regulation of cellular biosynthetic process                                                                                             | GO:0031328 | 1.10E-02 | 4.41E-02 | Fstl3,83554:down lce1,218333:down Adm,11535:up Pdgfc,54635:down Epas1,13819:up Ddah1,69219:down Lyl1,17095:up Sdpr,20324:down Trf,22041:up Ptx3,19288:up Wnt5a,22418:down Bmpr1a,12166:down Bmp4,12159:up lgf1,16000:up Ret,19713:up Plpp3,67916:up Ptgir,19222:up Creb3l1,26427:down Fgfr2,14183:up Kitl,17311:up Prl2c2,18811:up Htr2b,15559:down Ras11a,68895:up Inhba,16323:down Ccl3,20302:up Vdr,22337:down Vegfa,22339:down Htr2a,15558:down lgf2,16002:up Slc40a1,53945:up Pparg,19016:up Tnf,21926:up Glp1r,14652:down Egfr,13649:down Fgfr1,14182:down Sfrp1,20377:up Tgfb3,21814:up Ptgs2,19225:down Grem1,23892:up Sfrp2,20319:up Npnt,114249:up |
| response to decreased oxygen levels                                                                                                              | GO:0036293 | 1.11E-02 | 4.41E-02 | Loxl2,94352:down Cd24a,12484:down Hmox1,15368:up Plat,18791:down Epas1,13819:up Tgfb2,21808:down Vegfa,22339:down Mmp2,17390:down                                                                                                                                                                                                                                                                                                                                                                                                                                                                                                                            |
| single-organism behavior                                                                                                                         | GO:0044708 | 1.11E-02 | 4.41E-02 | Plk2,20620:down Glp1r,14652:down Egfr,13649:down Ncam1,17967:down Ptgs2,19225:down Il1rn,16181:up Sncg,20618:up lgf1,16000:up Srxp2,68792:down Cxc12,20315:up Htr2a,15558:down Prkar2b,19088:up Serpine2,20720:up Cxc3cr1,13051:down lgf2,16002:up                                                                                                                                                                                                                                                                                                                                                                                                           |
| replacement ossification                                                                                                                         | GO:0036075 | 1.12E-02 | 4.43E-02 | Alpl,11647:up Mmp13,17386:up Bmp4,12159:up                                                                                                                                                                                                                                                                                                                                                                                                                                                                                                                                                                                                                   |
| regulation of fibroblast growth factor receptor signaling pathway                                                                                | GO:0040036 | 1.12E-02 | 4.43E-02 | Sulf1,240725:down Wnt5a,22418:down Fgfr2,14183:up                                                                                                                                                                                                                                                                                                                                                                                                                                                                                                                                                                                                            |
| regulation of humoral immune response                                                                                                            | GO:0002920 | 1.12E-02 | 4.43E-02 | Tnf,21926:up Serping1,12258:up C3,12266:up                                                                                                                                                                                                                                                                                                                                                                                                                                                                                                                                                                                                                   |
| embryonic placenta morphogenesis                                                                                                                 | GO:0060669 | 1.12E-02 | 4.43E-02 | Adm,11535:up Gjb5,14622:down Fgfr2,14183:up                                                                                                                                                                                                                                                                                                                                                                                                                                                                                                                                                                                                                  |
| detoxification                                                                                                                                   | GO:0098754 | 1.12E-02 | 4.43E-02 | Tnf,21926:up Mt2,17750:up Mt1,17748:up                                                                                                                                                                                                                                                                                                                                                                                                                                                                                                                                                                                                                       |
| endochondral ossification                                                                                                                        | GO:0001958 | 1.12E-02 | 4.43E-02 | Alpl,11647:up Mmp13,17386:up Bmp4,12159:up                                                                                                                                                                                                                                                                                                                                                                                                                                                                                                                                                                                                                   |
| cardiac epithelial to mesenchymal transition                                                                                                     | GO:0060317 | 1.12E-02 | 4.43E-02 | Has2,15117:down Tgfb2,21808:down Tgfb3,21814:up                                                                                                                                                                                                                                                                                                                                                                                                                                                                                                                                                                                                              |
| negative regulation of production of molecular mediator of immune response                                                                       | GO:0002701 | 1.12E-02 | 4.43E-02 | Tnf,21926:up Hmox1,15368:up Tgfb2,21808:down                                                                                                                                                                                                                                                                                                                                                                                                                                                                                                                                                                                                                 |
| positive regulation of binding                                                                                                                   | GO:0051099 | 1.14E-02 | 4.52E-02 | Cthrc1,68588:down Plk2,20620:down Plxnd1,67784:up Wnt5a,22418:down Tgfb2,21808:down lgf1,16000:up Bmp4,12159:up                                                                                                                                                                                                                                                                                                                                                                                                                                                                                                                                              |
| regulation of Ras protein signal transduction                                                                                                    | GO:0046578 | 1.14E-02 | 4.52E-02 | Ccl9,20308:up Ccl6,20305:up Wnt5a,22418:down Ccl7,20306:up Ccl2,20296:up Ccl12,20293:up Ccl4,20303:up Ccl3,20302:up Col3a1,12825:down lgf1,16000:up Ccl8,20307:up Tgfb2,21808:down Kitl,17311:up                                                                                                                                                                                                                                                                                                                                                                                                                                                             |
| regulation of blood coagulation                                                                                                                  | GO:0030193 | 1.15E-02 | 4.54E-02 | Ceacam1,26365:up Kng1,16644:up Serping1,12258:up Hpse,15442:up Serpine2,20720:up                                                                                                                                                                                                                                                                                                                                                                                                                                                                                                                                                                             |
| regulation of hemostasis                                                                                                                         | GO:0190046 | 1.15E-02 | 4.54E-02 | Ceacam1,26365:up Kng1,16644:up Serping1,12258:up Hpse,15442:up Serpine2,20720:up                                                                                                                                                                                                                                                                                                                                                                                                                                                                                                                                                                             |
| positive regulation of adaptive immune response based on somatic recombination of immune receptors built from immunoglobulin superfamily domains | GO:0002824 | 1.15E-02 | 4.54E-02 | Tnf,21926:up Cd24a,12484:down Cd4,12504:up C3,12266:up Tfrc,22042:up                                                                                                                                                                                                                                                                                                                                                                                                                                                                                                                                                                                         |
| regulation of transcription factor import into nucleus                                                                                           | GO:0042990 | 1.15E-02 | 4.54E-02 | Ceacam1,26365:up Tnf,21926:up C1qtnf3,81799:down Ptgs2,19225:down Grem1,23892:up                                                                                                                                                                                                                                                                                                                                                                                                                                                                                                                                                                             |
| protein autophosphorylation                                                                                                                      | GO:0046777 | 1.17E-02 | 4.61E-02 | Fgfr1,14182:down Egfr,13649:down Pdgfc,54635:down Grem1,23892:up Adipoq,11450:up Vegfa,22339:down Errfi1,74155:down Fgfr2,14183:up Enpp1,18605:down                                                                                                                                                                                                                                                                                                                                                                                                                                                                                                          |
| regulation of blood vessel endothelial cell migration                                                                                            | GO:0043535 | 1.17E-02 | 4.62E-02 | Prl2c2,18811:up Srxp2,68792:down Vegfa,22339:down Ptgs2,19225:down                                                                                                                                                                                                                                                                                                                                                                                                                                                                                                                                                                                           |
| negative regulation of leukocyte apoptotic process                                                                                               | GO:2000107 | 1.17E-02 | 4.62E-02 | Gas6,14456:up Cxc12,20315:up Kitl,17311:up Bmp4,12159:up                                                                                                                                                                                                                                                                                                                                                                                                                                                                                                                                                                                                     |

|                                                           |            |          |          |                                                                                                                                                                                                                                                                                                                                                                                                                                                                                                                                                                                                                                                                                                                                                                                                                                                                                                                                                                                                                                                                                                                                                                                                                                                                                                                                                                                                                                                                                                                                                                                                                                                                                                                                                                                                                                                                                                                                                                                                                                                                                                                                                                                                                                                                                                                                                                                                                                                                                                                                                                                                                                                                                       |
|-----------------------------------------------------------|------------|----------|----------|---------------------------------------------------------------------------------------------------------------------------------------------------------------------------------------------------------------------------------------------------------------------------------------------------------------------------------------------------------------------------------------------------------------------------------------------------------------------------------------------------------------------------------------------------------------------------------------------------------------------------------------------------------------------------------------------------------------------------------------------------------------------------------------------------------------------------------------------------------------------------------------------------------------------------------------------------------------------------------------------------------------------------------------------------------------------------------------------------------------------------------------------------------------------------------------------------------------------------------------------------------------------------------------------------------------------------------------------------------------------------------------------------------------------------------------------------------------------------------------------------------------------------------------------------------------------------------------------------------------------------------------------------------------------------------------------------------------------------------------------------------------------------------------------------------------------------------------------------------------------------------------------------------------------------------------------------------------------------------------------------------------------------------------------------------------------------------------------------------------------------------------------------------------------------------------------------------------------------------------------------------------------------------------------------------------------------------------------------------------------------------------------------------------------------------------------------------------------------------------------------------------------------------------------------------------------------------------------------------------------------------------------------------------------------------------|
| regulation of T cell activation                           | GO:0050863 | 1.18E-02 | 4.65E-02 | Cd24a,12484:down Ccl2,20296:up Cd4,12504:up Tfrc,22042:up Igf1,16000:up Bmp4,12159:up Ctla2a,13024:down Ceacam1,26365:up Igf2,16002:up Tnfsf9,21950:up                                                                                                                                                                                                                                                                                                                                                                                                                                                                                                                                                                                                                                                                                                                                                                                                                                                                                                                                                                                                                                                                                                                                                                                                                                                                                                                                                                                                                                                                                                                                                                                                                                                                                                                                                                                                                                                                                                                                                                                                                                                                                                                                                                                                                                                                                                                                                                                                                                                                                                                                |
| regulation of ion homeostasis                             | GO:2000021 | 1.18E-02 | 4.66E-02 | Htr2b,15559:down Glp1r,14652:down Cd4,12504:up Ednrb,13618:up Bmp4,12159:up Htr2a,15558:down Tgfb2,21808:down Anpep,16790:up                                                                                                                                                                                                                                                                                                                                                                                                                                                                                                                                                                                                                                                                                                                                                                                                                                                                                                                                                                                                                                                                                                                                                                                                                                                                                                                                                                                                                                                                                                                                                                                                                                                                                                                                                                                                                                                                                                                                                                                                                                                                                                                                                                                                                                                                                                                                                                                                                                                                                                                                                          |
| regulation of binding                                     | GO:0051098 | 1.19E-02 | 4.69E-02 | Cthrc1,68588:down Plk2,20620:down Plxnd1,67784:up Hmox1,15368:up Wnt5a,22418:down Tgfb3,21814:up Sipi,20568:up Igf1,16000:up Bmp4,12159:up Adipoq,11450:up Tgfb2,21808:down                                                                                                                                                                                                                                                                                                                                                                                                                                                                                                                                                                                                                                                                                                                                                                                                                                                                                                                                                                                                                                                                                                                                                                                                                                                                                                                                                                                                                                                                                                                                                                                                                                                                                                                                                                                                                                                                                                                                                                                                                                                                                                                                                                                                                                                                                                                                                                                                                                                                                                           |
| glucose transport                                         | GO:0015758 | 1.20E-02 | 4.71E-02 | Tnf,21926:up Fabp5,16592:up C3,12266:up Enpp1,18605:down Igf1,16000:up Adipoq,11450:up                                                                                                                                                                                                                                                                                                                                                                                                                                                                                                                                                                                                                                                                                                                                                                                                                                                                                                                                                                                                                                                                                                                                                                                                                                                                                                                                                                                                                                                                                                                                                                                                                                                                                                                                                                                                                                                                                                                                                                                                                                                                                                                                                                                                                                                                                                                                                                                                                                                                                                                                                                                                |
| cellular polysaccharide metabolic process                 | GO:0044264 | 1.21E-02 | 4.76E-02 | Has2,15117:down Aoah,27052:up Enpp1,18605:down Igf2,16002:up Igf1,16000:up                                                                                                                                                                                                                                                                                                                                                                                                                                                                                                                                                                                                                                                                                                                                                                                                                                                                                                                                                                                                                                                                                                                                                                                                                                                                                                                                                                                                                                                                                                                                                                                                                                                                                                                                                                                                                                                                                                                                                                                                                                                                                                                                                                                                                                                                                                                                                                                                                                                                                                                                                                                                            |
| monoamine transport                                       | GO:0015844 | 1.21E-02 | 4.76E-02 | Gpm6b,14758:up Cxcl12,20315:up Htr2a,15558:down Sncg,20618:up Maob,109731:up                                                                                                                                                                                                                                                                                                                                                                                                                                                                                                                                                                                                                                                                                                                                                                                                                                                                                                                                                                                                                                                                                                                                                                                                                                                                                                                                                                                                                                                                                                                                                                                                                                                                                                                                                                                                                                                                                                                                                                                                                                                                                                                                                                                                                                                                                                                                                                                                                                                                                                                                                                                                          |
| pancreas development                                      | GO:0031016 | 1.21E-02 | 4.76E-02 | Wnt5a,22418:down Aldh1a2,19378:up Igf2,16002:up Igf1,16000:up Bmp4,12159:up                                                                                                                                                                                                                                                                                                                                                                                                                                                                                                                                                                                                                                                                                                                                                                                                                                                                                                                                                                                                                                                                                                                                                                                                                                                                                                                                                                                                                                                                                                                                                                                                                                                                                                                                                                                                                                                                                                                                                                                                                                                                                                                                                                                                                                                                                                                                                                                                                                                                                                                                                                                                           |
| regulation of DNA metabolic process                       | GO:0051052 | 1.23E-02 | 4.83E-02 | Pparg,19016:up Fgfr1,14182:down Egfr,13649:down Pdgfc,54635:down Tfrc,22042:up Grem1,23892:up Igf1,16000:up Bmp4,12159:up Adipoq,11450:up Ankrd1,107765:down Igf3,16009:up Kitl,17311:up                                                                                                                                                                                                                                                                                                                                                                                                                                                                                                                                                                                                                                                                                                                                                                                                                                                                                                                                                                                                                                                                                                                                                                                                                                                                                                                                                                                                                                                                                                                                                                                                                                                                                                                                                                                                                                                                                                                                                                                                                                                                                                                                                                                                                                                                                                                                                                                                                                                                                              |
| negative regulation of leukocyte migration                | GO:0002686 | 1.24E-02 | 4.85E-02 | Cxcl12,20315:up Ccl12,20293:up Grem1,23892:up                                                                                                                                                                                                                                                                                                                                                                                                                                                                                                                                                                                                                                                                                                                                                                                                                                                                                                                                                                                                                                                                                                                                                                                                                                                                                                                                                                                                                                                                                                                                                                                                                                                                                                                                                                                                                                                                                                                                                                                                                                                                                                                                                                                                                                                                                                                                                                                                                                                                                                                                                                                                                                         |
| heart trabecula morphogenesis                             | GO:0061384 | 1.24E-02 | 4.85E-02 | Tgfb2,21808:down Bmpr1a,12166:down Tgfb3,21814:up                                                                                                                                                                                                                                                                                                                                                                                                                                                                                                                                                                                                                                                                                                                                                                                                                                                                                                                                                                                                                                                                                                                                                                                                                                                                                                                                                                                                                                                                                                                                                                                                                                                                                                                                                                                                                                                                                                                                                                                                                                                                                                                                                                                                                                                                                                                                                                                                                                                                                                                                                                                                                                     |
| modification by symbiont of host morphology or physiology | GO:0044003 | 1.24E-02 | 4.85E-02 | Ceacam1,26365:up Ptx3,19288:up Cd4,12504:up                                                                                                                                                                                                                                                                                                                                                                                                                                                                                                                                                                                                                                                                                                                                                                                                                                                                                                                                                                                                                                                                                                                                                                                                                                                                                                                                                                                                                                                                                                                                                                                                                                                                                                                                                                                                                                                                                                                                                                                                                                                                                                                                                                                                                                                                                                                                                                                                                                                                                                                                                                                                                                           |
| positive regulation of cartilage development              | GO:0061036 | 1.24E-02 | 4.85E-02 | Loxl2,94352:down Wnt5a,22418:down Bmp4,12159:up                                                                                                                                                                                                                                                                                                                                                                                                                                                                                                                                                                                                                                                                                                                                                                                                                                                                                                                                                                                                                                                                                                                                                                                                                                                                                                                                                                                                                                                                                                                                                                                                                                                                                                                                                                                                                                                                                                                                                                                                                                                                                                                                                                                                                                                                                                                                                                                                                                                                                                                                                                                                                                       |
| primary metabolic process                                 | GO:0044238 | 1.24E-02 | 4.86E-02 | Fstl3,83554:down Igf1,16000:up Adm,11535:up Flrt2,399558:down Tfec,21426:up Sfrp4,20379:up Serpinh1,12406:down Lyl1,17095:up Gstt1,14871:up Igf3,16009:up Plk2,20620:down Cd24a,12484:down Mme,17380:up Fkbp14,231997:down Il1rn,16181:up Maob,109731:up Bmp4,12159:up Hpsa,15442:up Ptgir,19222:up Fgfr2,14183:up Htr2b,15559:down Ccl6,20305:up Sipi,20568:up Aspn,66695:down Fam132b,227358:down Nabp1,109019:down Mmp2,17390:down Oas3,246727:up Pappa,18491:down Slc40a1,53945:up Egfr,13649:down C1rb,667277:up Tfrc,22042:up Ccl8,20307:up Serpina3g,20715:up Fam20a,208659:down Aldh1a2,19378:up Ccl2,20296:up Ednrb,13618:up Ampd3,11717:up Mmp13,17386:up Htra3,78558:down Uchl5,56207:up Sord,20322:up Enpp3,209558:down Cdo1,12583:up Dok2,13449:up Mamdc2,71738:down Ptx3,19288:up Ccl4,20303:up Chst11,58250:down Vegfb,22340:up Aldh1a3,56847:down Ppp3,67916:up Ccl9,20308:up Inhba,16323:down Bnc2,242509:down Tfpi2,21789:down Crlf1,12931:down C1s1,50908:up Vegfa,22339:down Gfpt2,14584:down Cbr2,12409:up Serpine2,20720:up Nxn,18230:down Igf2,16002:up Tnf,21926:up Fgfr1,14182:down Lpl,16956:up Sulf1,240725:down Cd4,12504:up Col3a1,12825:down Tbx15,21384:down Serpinc1,12258:up Uck2,80914:down Enpp1,18605:down Hpgd,15446:up C3,12266:up Enpp5,83965:up Ankrd1,107765:down Cd109,235505:down Ggt5,23887:up Loxl2,94352:down Trf,22041:up Loxl3,16950:down Adam12,11489:down Wnt5a,22418:down Mark1,226778:up Adipoq,11450:up Hal,15109:up Igf1,16000:up Crabp2,12904:down Tgfb2,21808:down F3,14066:up Adamts4,240913:down Kng1,16644:up Prl2c2,18811:up Efemp1,216616:up Saa3,20210:up Gdpd1,66569:up Vdr,22337:down Pdia5,72599:down Fabp4,11770:up Htr2a,15558:down Gas6,14456:up Col11a1,12814:down Sfrp1,20377:up C1qtnf3,81799:down Tgfb3,21814:up Serinc2,230779:down Tll1,21892:down Ceacam1,26365:up Sfrp2,20319:up Pamr1,210622:up Tnfrsf11b,18383:up Prkar2b,19088:up Npnt,114249:up S100a1,20193:up Ice1,218333:down Neurl3,214854:down Ccl7,20306:up Pdzn3,55983:down Pdgfc,54635:down Cst7,13011:up Epas1,13819:up Sema7a,20361:down Ddah1,69219:down Fkbp10,14230:down Sdpr,20324:down Npl,74091:up Man2a2,140481:up Akr1c18,105349:up Fabp5,16592:up Ccl12,20293:up Bmpr1a,12166:down Klk1b1,16613:up Gatm,67092:down Ret,19713:up Prg4,96875:down Sdf2l1,64136:up C1s2,317677:up Creb3l1,26427:down Kitl,17311:up P4ha1,18451:down Hp,15439:up Aoah,27052:up Rasl11a,68895:up Ccl3,20302:up Plat,18791:down Ctla2a,13024:down Adamts12,239337:down Lrrc15,74488:down Anpep,16790:up Pparg,19016:up Lmcd1,30937:up Glp1r,14652:down Hmox1,15368:up Has2,15117:down Ptgs2,19225:down Grem1,23892:up Phf11d,219132:up Errfi1,74155:down |
| syncytium formation by plasma membrane fusion             | GO:0000768 | 1.25E-02 | 4.90E-02 | Ccl8,20307:up Cxcl9,17329:up Cxcl12,20315:up Cd109,235505:down                                                                                                                                                                                                                                                                                                                                                                                                                                                                                                                                                                                                                                                                                                                                                                                                                                                                                                                                                                                                                                                                                                                                                                                                                                                                                                                                                                                                                                                                                                                                                                                                                                                                                                                                                                                                                                                                                                                                                                                                                                                                                                                                                                                                                                                                                                                                                                                                                                                                                                                                                                                                                        |
| regulation of protein binding                             | GO:0043393 | 1.26E-02 | 4.93E-02 | Cthrc1,68588:down Plk2,20620:down Plxnd1,67784:up Wnt5a,22418:down Tgfb3,21814:up Sipi,20568:up Bmp4,12159:up Adipoq,11450:up                                                                                                                                                                                                                                                                                                                                                                                                                                                                                                                                                                                                                                                                                                                                                                                                                                                                                                                                                                                                                                                                                                                                                                                                                                                                                                                                                                                                                                                                                                                                                                                                                                                                                                                                                                                                                                                                                                                                                                                                                                                                                                                                                                                                                                                                                                                                                                                                                                                                                                                                                         |
| signal release                                            | GO:0023061 | 1.27E-02 | 4.94E-02 | Tnf,21926:up Pparg,19016:up Glp1r,14652:down Adm,11535:up Fgfr1,14182:down Egfr,13649:down Sfrp1,20377:up C1qtnf3,81799:down Inhba,16323:down Il1rn,16181:up Sncg,20618:up Adipoq,11450:up Htr2a,15558:down Synt13,80976:up                                                                                                                                                                                                                                                                                                                                                                                                                                                                                                                                                                                                                                                                                                                                                                                                                                                                                                                                                                                                                                                                                                                                                                                                                                                                                                                                                                                                                                                                                                                                                                                                                                                                                                                                                                                                                                                                                                                                                                                                                                                                                                                                                                                                                                                                                                                                                                                                                                                           |
| hormone metabolic process                                 | GO:0042445 | 1.27E-02 | 4.96E-02 | Crabp2,12904:down Akr1c18,105349:up Adm,11535:up Aldh1a2,19378:up Aldh1a3,56847:down Igf2,16002:up Igf1,16000:up                                                                                                                                                                                                                                                                                                                                                                                                                                                                                                                                                                                                                                                                                                                                                                                                                                                                                                                                                                                                                                                                                                                                                                                                                                                                                                                                                                                                                                                                                                                                                                                                                                                                                                                                                                                                                                                                                                                                                                                                                                                                                                                                                                                                                                                                                                                                                                                                                                                                                                                                                                      |
| positive regulation of protein binding                    | GO:0032092 | 1.28E-02 | 4.96E-02 | Cthrc1,68588:down Plk2,20620:down Plxnd1,67784:up Wnt5a,22418:down Bmp4,12159:up                                                                                                                                                                                                                                                                                                                                                                                                                                                                                                                                                                                                                                                                                                                                                                                                                                                                                                                                                                                                                                                                                                                                                                                                                                                                                                                                                                                                                                                                                                                                                                                                                                                                                                                                                                                                                                                                                                                                                                                                                                                                                                                                                                                                                                                                                                                                                                                                                                                                                                                                                                                                      |
| synaptic transmission, glutamatergic                      | GO:0035249 | 1.28E-02 | 4.96E-02 | Egfr,13649:down Htr2a,15558:down Ptgs2,19225:down Serpine2,20720:up Plat,18791:down                                                                                                                                                                                                                                                                                                                                                                                                                                                                                                                                                                                                                                                                                                                                                                                                                                                                                                                                                                                                                                                                                                                                                                                                                                                                                                                                                                                                                                                                                                                                                                                                                                                                                                                                                                                                                                                                                                                                                                                                                                                                                                                                                                                                                                                                                                                                                                                                                                                                                                                                                                                                   |
| response to ketone                                        | GO:1901654 | 1.28E-02 | 4.96E-02 | Gas6,14456:up Postn,50706:down Tgfb2,21808:down Tgfb3,21814:up Bmp4,12159:up                                                                                                                                                                                                                                                                                                                                                                                                                                                                                                                                                                                                                                                                                                                                                                                                                                                                                                                                                                                                                                                                                                                                                                                                                                                                                                                                                                                                                                                                                                                                                                                                                                                                                                                                                                                                                                                                                                                                                                                                                                                                                                                                                                                                                                                                                                                                                                                                                                                                                                                                                                                                          |
| transcription factor import into nucleus                  | GO:0042991 | 1.28E-02 | 4.96E-02 | Ceacam1,26365:up Tnf,21926:up C1qtnf3,81799:down Ptgs2,19225:down Grem1,23892:up                                                                                                                                                                                                                                                                                                                                                                                                                                                                                                                                                                                                                                                                                                                                                                                                                                                                                                                                                                                                                                                                                                                                                                                                                                                                                                                                                                                                                                                                                                                                                                                                                                                                                                                                                                                                                                                                                                                                                                                                                                                                                                                                                                                                                                                                                                                                                                                                                                                                                                                                                                                                      |
| ovulation cycle process                                   | GO:0022602 | 1.28E-02 | 4.96E-02 | Vegfa,22339:down Inhba,16323:down Mmp2,17390:down Kitl,17311:up Bmp4,12159:up                                                                                                                                                                                                                                                                                                                                                                                                                                                                                                                                                                                                                                                                                                                                                                                                                                                                                                                                                                                                                                                                                                                                                                                                                                                                                                                                                                                                                                                                                                                                                                                                                                                                                                                                                                                                                                                                                                                                                                                                                                                                                                                                                                                                                                                                                                                                                                                                                                                                                                                                                                                                         |
| maintenance of location                                   | GO:0051235 | 1.28E-02 | 4.98E-02 | Kdelr3,105785:down Htr2b,15559:down Tnf,21926:up Pparg,19016:up Glp1r,14652:down Lpl,16956:up Cd4,12504:up C3,12266:up Tgfb2,21808:down Htr2a,15558:down Enpp1,18605:down                                                                                                                                                                                                                                                                                                                                                                                                                                                                                                                                                                                                                                                                                                                                                                                                                                                                                                                                                                                                                                                                                                                                                                                                                                                                                                                                                                                                                                                                                                                                                                                                                                                                                                                                                                                                                                                                                                                                                                                                                                                                                                                                                                                                                                                                                                                                                                                                                                                                                                             |
| leukocyte activation                                      | GO:0045321 | 1.29E-02 | 4.99E-02 | Ly9,17085:up Ccl2,20296:up Ctla2a,13024:down Lyl1,17095:up Cxcl12,20315:up Cx3cr1,13051:down Igf2,16002:up Gas6,14456:up Cd24a,12484:down Hmox1,15368:up Sfrp1,20377:up Wnt5a,22418:down Cd4,12504:up Tfrc,22042:up Bmp4,12159:up Igf1,16000:up Ceacam1,26365:up Il1rl1,17082:down Tnfsf9,21950:up Clec4e,56619:up                                                                                                                                                                                                                                                                                                                                                                                                                                                                                                                                                                                                                                                                                                                                                                                                                                                                                                                                                                                                                                                                                                                                                                                                                                                                                                                                                                                                                                                                                                                                                                                                                                                                                                                                                                                                                                                                                                                                                                                                                                                                                                                                                                                                                                                                                                                                                                    |

|                                                                   |            |          |          |                                                                                                                                                                                                                                                                                                                                                                                                                                                                        |
|-------------------------------------------------------------------|------------|----------|----------|------------------------------------------------------------------------------------------------------------------------------------------------------------------------------------------------------------------------------------------------------------------------------------------------------------------------------------------------------------------------------------------------------------------------------------------------------------------------|
| gonad development                                                 | GO:0008406 | 1.30E-02 | 5.06E-02 | Sfrp1,20377:up Wnt5a,22418:down Inhba,16323:down Bmp4,12159:up Sfrp2,20319:up Vegfa,22339:down Mmp2,17390:down Kitl,17311:up                                                                                                                                                                                                                                                                                                                                           |
| calcium ion transport into cytosol                                | GO:0060402 | 1.31E-02 | 5.06E-02 | Htr2b,15559:down Glp1r,14652:down Tgfb2,21808:down Htr2a,15558:down Cd4,12504:up Bmp4,12159:up                                                                                                                                                                                                                                                                                                                                                                         |
| hexose transport                                                  | GO:0008645 | 1.31E-02 | 5.06E-02 | Tnf,21926:up Fabp5,16592:up C3,12266:up Enpp1,18605:down Igf1,16000:up Adipoq,11450:up                                                                                                                                                                                                                                                                                                                                                                                 |
| axon development                                                  | GO:0061564 | 1.32E-02 | 5.10E-02 | Flrt2,399558:down Lama2,16773:down Plxnd1,67784:up Wnt5a,22418:down Sema7a,20361:down Tnfrsf12a,27279:down Crabp2,12904:down Tnc,21923:down Ret,19713:up Cxcl12,20315:up Vegfa,22339:down Tgfb2,21808:down Mmp2,17390:down Fgfr2,14183:up                                                                                                                                                                                                                              |
| eye development                                                   | GO:0001654 | 1.32E-02 | 5.10E-02 | Col5a2,12832:down Egfr,13649:down Inhba,16323:down Aldh1a2,19378:up Col8a1,12837:down Ninj1,18081:up Bmp4,12159:up Col5a1,12831:down Vegfa,22339:down Tgfb2,21808:down Aldh1a3,56847:down Fgfr2,14183:up                                                                                                                                                                                                                                                               |
| calcium ion import                                                | GO:0070509 | 1.32E-02 | 5.11E-02 | Htr2b,15559:down Glp1r,14652:down Cxcl12,20315:up Tgfb2,21808:down Htr2a,15558:down Ccl12,20293:up Stc1,20855:up                                                                                                                                                                                                                                                                                                                                                       |
| regulation of vasculogenesis                                      | GO:2001212 | 1.33E-02 | 5.11E-02 | Ceacam1,26365:up Adm,11535:up                                                                                                                                                                                                                                                                                                                                                                                                                                          |
| regulation of cytokine secretion involved in immune response      | GO:0002739 | 1.33E-02 | 5.11E-02 | Tnf,21926:up Wnt5a,22418:down                                                                                                                                                                                                                                                                                                                                                                                                                                          |
| induction of positive chemotaxis                                  | GO:0050930 | 1.33E-02 | 5.11E-02 | Cxcl12,20315:up Figf,14205:up                                                                                                                                                                                                                                                                                                                                                                                                                                          |
| regulation of branching involved in salivary gland morphogenesis  | GO:0060693 | 1.33E-02 | 5.11E-02 | Tnf,21926:up Fgfr1,14182:down                                                                                                                                                                                                                                                                                                                                                                                                                                          |
| exocrine pancreas development                                     | GO:0031017 | 1.33E-02 | 5.11E-02 | Igf2,16002:up Igf1,16000:up                                                                                                                                                                                                                                                                                                                                                                                                                                            |
| positive regulation of SMAD protein import into nucleus           | GO:0060391 | 1.33E-02 | 5.11E-02 | Bmpr1a,12166:down Bmp4,12159:up                                                                                                                                                                                                                                                                                                                                                                                                                                        |
| surfactant homeostasis                                            | GO:0043129 | 1.33E-02 | 5.11E-02 | Vegfa,22339:down Epas1,13819:up                                                                                                                                                                                                                                                                                                                                                                                                                                        |
| regulation of chemokine (C-X-C motif) ligand 2 production         | GO:2000341 | 1.33E-02 | 5.11E-02 | Tnf,21926:up Postn,50706:down                                                                                                                                                                                                                                                                                                                                                                                                                                          |
| negative regulation of multicellular organismal metabolic process | GO:0044252 | 1.33E-02 | 5.11E-02 | Pparg,19016:up Errfi1,74155:down                                                                                                                                                                                                                                                                                                                                                                                                                                       |
| positive regulation of endothelial cell chemotaxis                | GO:2001028 | 1.33E-02 | 5.11E-02 | Fgfr1,14182:down Vegfa,22339:down                                                                                                                                                                                                                                                                                                                                                                                                                                      |
| regulation of leukocyte mediated cytotoxicity                     | GO:0001910 | 1.34E-02 | 5.14E-02 | Ceacam1,26365:up Clec2d,93694:up Ccl2,20296:up Igf2,16002:up                                                                                                                                                                                                                                                                                                                                                                                                           |
| negative regulation of reproductive process                       | GO:2000242 | 1.34E-02 | 5.14E-02 | Sulf1,240725:down Wnt5a,22418:down Igf1,16000:up Bmp4,12159:up                                                                                                                                                                                                                                                                                                                                                                                                         |
| leukocyte aggregation                                             | GO:0070486 | 1.34E-02 | 5.14E-02 | Cd24a,12484:down Ly9,17085:up Has2,15117:down Ccl2,20296:up Cd4,12504:up Tfrc,22042:up Igf1,16000:up Bmp4,12159:up Ctla2a,13024:down Ceacam1,26365:up Cxcl12,20315:up Igf2,16002:up Clec4e,56619:up Tnfrsf9,21950:up                                                                                                                                                                                                                                                   |
| response to oxygen levels                                         | GO:0070482 | 1.35E-02 | 5.15E-02 | Loxl2,94352:down Cd24a,12484:down Hmox1,15368:up Plat,18791:down Epas1,13819:up Tgfb2,21808:down Vegfa,22339:down Mmp2,17390:down                                                                                                                                                                                                                                                                                                                                      |
| regulation of peptidyl-serine phosphorylation                     | GO:0033135 | 1.36E-02 | 5.21E-02 | Tnf,21926:up Gas6,14456:up Sfrp2,20319:up Ret,19713:up Wnt5a,22418:down Vegfa,22339:down                                                                                                                                                                                                                                                                                                                                                                               |
| placenta development                                              | GO:0001890 | 1.37E-02 | 5.21E-02 | Pparg,19016:up Adm,11535:up Egfr,13649:down Gjb5,14622:down Ptgs2,19225:down Fgfr2,14183:up Epas1,13819:up                                                                                                                                                                                                                                                                                                                                                             |
| phagocytosis                                                      | GO:0006909 | 1.37E-02 | 5.21E-02 | Tnf,21926:up Pparg,19016:up Gas6,14456:up Ptx3,19288:up Ccl2,20296:up C3,12266:up Adipoq,11450:up                                                                                                                                                                                                                                                                                                                                                                      |
| cartilage development involved in endochondral bone morphogenesis | GO:0060351 | 1.37E-02 | 5.21E-02 | Serpinh1,12406:down Stc1,20855:up Mmp13,17386:up                                                                                                                                                                                                                                                                                                                                                                                                                       |
| negative regulation of protein maturation                         | GO:1903318 | 1.37E-02 | 5.21E-02 | Ctla2a,13024:down Serping1,12258:up Serpine2,20720:up                                                                                                                                                                                                                                                                                                                                                                                                                  |
| regulation of glycogen metabolic process                          | GO:0070873 | 1.37E-02 | 5.21E-02 | Enpp1,18605:down Igf2,16002:up Igf1,16000:up                                                                                                                                                                                                                                                                                                                                                                                                                           |
| regulation of syncytium formation by plasma membrane fusion       | GO:0060142 | 1.37E-02 | 5.21E-02 | Ccl8,20307:up Cxcl9,17329:up Cxcl12,20315:up                                                                                                                                                                                                                                                                                                                                                                                                                           |
| aorta morphogenesis                                               | GO:0035909 | 1.37E-02 | 5.21E-02 | Tgfb2,21808:down Bmpr1a,12166:down Col3a1,12825:down                                                                                                                                                                                                                                                                                                                                                                                                                   |
| negative regulation of DNA biosynthetic process                   | GO:2000279 | 1.37E-02 | 5.21E-02 | Ankrd1,107765:down Pparg,19016:up Adipoq,11450:up                                                                                                                                                                                                                                                                                                                                                                                                                      |
| negative regulation of protein processing                         | GO:0010955 | 1.37E-02 | 5.21E-02 | Ctla2a,13024:down Serping1,12258:up Serpine2,20720:up                                                                                                                                                                                                                                                                                                                                                                                                                  |
| lipid metabolic process                                           | GO:0006629 | 1.39E-02 | 5.26E-02 | Htr2b,15559:down Adm,11535:up Hpgd,15446:up Aoah,27052:up Aldh1a2,19378:up C3,12266:up Gdpc1,66569:up Vdr,22337:down Fabp4,11770:up Fam132b,227358:down Htr2a,15558:down Igf2,16002:up Pparg,19016:up Tnf,21926:up Ggt5,23887:up Akr1c18,105349:up Fgfr1,14182:down Fabp5,16592:up Lpl,16956:up Ptgs2,19225:down Irf1,16181:up Serinc2,230779:down Adipoq,11450:up Igf1,16000:up Ceacam1,26365:up Crabp2,12904:down Aldh1a3,56847:down Plpp3,67916:up Prkar2b,19088:up |

|                                                                                                                                         |            |          |          |                                                                                                                                                                                                                                                                                                                                                                                                                                                                                                                                                                                                                                                                                                                                                                                                                                                                                                                                                                                                                                                                                                                                                                                                                                                                                                                                                                      |
|-----------------------------------------------------------------------------------------------------------------------------------------|------------|----------|----------|----------------------------------------------------------------------------------------------------------------------------------------------------------------------------------------------------------------------------------------------------------------------------------------------------------------------------------------------------------------------------------------------------------------------------------------------------------------------------------------------------------------------------------------------------------------------------------------------------------------------------------------------------------------------------------------------------------------------------------------------------------------------------------------------------------------------------------------------------------------------------------------------------------------------------------------------------------------------------------------------------------------------------------------------------------------------------------------------------------------------------------------------------------------------------------------------------------------------------------------------------------------------------------------------------------------------------------------------------------------------|
| regulation of multi-organism process                                                                                                    | GO:0043900 | 1.41E-02 | 5.37E-02 | Tnf,21926:up Lmcd1,30937:up Ptx3,19288:up Inhba,16323:down Sipi,20568:up Ednrb,13618:up Plat,18791:down Ccl4,20303:up Igf1,16000:up Ceacam1,26365:up Oasl1,231655:up Iifit1,15957:up Oas3,246727:up                                                                                                                                                                                                                                                                                                                                                                                                                                                                                                                                                                                                                                                                                                                                                                                                                                                                                                                                                                                                                                                                                                                                                                  |
| negative regulation of vasculature development                                                                                          | GO:1901343 | 1.42E-02 | 5.37E-02 | Sulf1,240725:down Ccl2,20296:up Cx3cr1,13051:down Thbs2,21826:down Bmp4,12159:up                                                                                                                                                                                                                                                                                                                                                                                                                                                                                                                                                                                                                                                                                                                                                                                                                                                                                                                                                                                                                                                                                                                                                                                                                                                                                     |
| regulation of coagulation                                                                                                               | GO:0050818 | 1.42E-02 | 5.37E-02 | Ceacam1,26365:up Kng1,16644:up Serp1,12258:up Hpse,15442:up Serpine2,20720:up                                                                                                                                                                                                                                                                                                                                                                                                                                                                                                                                                                                                                                                                                                                                                                                                                                                                                                                                                                                                                                                                                                                                                                                                                                                                                        |
| columnar/cuboidal epithelial cell differentiation                                                                                       | GO:0020265 | 1.42E-02 | 5.37E-02 | Fgfr1,14182:down Mcoln3,171166:up Wnt5a,22418:down Ednrb,13618:up Fgfr2,14183:up Kitl,17311:up Bmp4,12159:up                                                                                                                                                                                                                                                                                                                                                                                                                                                                                                                                                                                                                                                                                                                                                                                                                                                                                                                                                                                                                                                                                                                                                                                                                                                         |
| regulation of hormone secretion                                                                                                         | GO:0046883 | 1.42E-02 | 5.37E-02 | Tnf,21926:up Pparg,19016:up Glp1r,14652:down Fgfr1,14182:down Egfr,13649:down Sfrp1,20377:up C1qtnf3,81799:down Inhba,16323:down Adipoq,11450:up Htr2a,15558:down                                                                                                                                                                                                                                                                                                                                                                                                                                                                                                                                                                                                                                                                                                                                                                                                                                                                                                                                                                                                                                                                                                                                                                                                    |
| cytosolic calcium ion transport                                                                                                         | GO:0060401 | 1.42E-02 | 5.37E-02 | Htr2b,15559:down Glp1r,14652:down Tgfb2,21808:down Htr2a,15558:down Cd4,12504:up Bmp4,12159:up                                                                                                                                                                                                                                                                                                                                                                                                                                                                                                                                                                                                                                                                                                                                                                                                                                                                                                                                                                                                                                                                                                                                                                                                                                                                       |
| monosaccharide transport                                                                                                                | GO:0015749 | 1.42E-02 | 5.37E-02 | Tnf,21926:up Fabp5,16592:up C3,12266:up Enpp1,18605:down Igf1,16000:up Adipoq,11450:up                                                                                                                                                                                                                                                                                                                                                                                                                                                                                                                                                                                                                                                                                                                                                                                                                                                                                                                                                                                                                                                                                                                                                                                                                                                                               |
| syncytium formation                                                                                                                     | GO:0006949 | 1.43E-02 | 5.41E-02 | Ccl8,20307:up Cxc19,17329:up Cxc12,20315:up Cd109,235505:down                                                                                                                                                                                                                                                                                                                                                                                                                                                                                                                                                                                                                                                                                                                                                                                                                                                                                                                                                                                                                                                                                                                                                                                                                                                                                                        |
| mammary gland morphogenesis                                                                                                             | GO:0060443 | 1.43E-02 | 5.41E-02 | Vdr,22337:down Wnt5a,22418:down Fgfr2,14183:up Bmp4,12159:up                                                                                                                                                                                                                                                                                                                                                                                                                                                                                                                                                                                                                                                                                                                                                                                                                                                                                                                                                                                                                                                                                                                                                                                                                                                                                                         |
| development of primary sexual characteristics                                                                                           | GO:0045137 | 1.43E-02 | 5.41E-02 | Sfrp1,20377:up Wnt5a,22418:down Inhba,16323:down Bmp4,12159:up Sfrp2,20319:up Vegfa,22339:down Mmp2,17390:down Kitl,17311:up                                                                                                                                                                                                                                                                                                                                                                                                                                                                                                                                                                                                                                                                                                                                                                                                                                                                                                                                                                                                                                                                                                                                                                                                                                         |
| transport                                                                                                                               | GO:0006810 | 1.48E-02 | 5.57E-02 | Adm,11535:up Strp4,20379:up C3,12266:up Ankrd1,107765:down Irf,22041:up Cd24a,12484:down Wnt5a,22418:down Stc1,20855:up Il1rn,16181:up Maob,109731:up Adipoq,11450:up Bmp4,12159:up Igf1,16000:up Crabp2,12904:down Mcoln2,68279:up Tgfb2,21808:down Fgfr2,14183:up Clec4e,56619:up Htr2b,15559:down Mfsd12,73822:up Vdr,22337:down Fabp4,11770:up Fam132b,227358:down Cxc12,20315:up Htr2a,15558:down Slc16a4,229699:down Slc40a1,53945:up Gas6,14456:up Egfr,13649:down Sec23a,20334:down Sfrp1,20377:up C1qtnf3,81799:down Tfrc,22042:up Sncc,20618:up Fxyd2,11936:up Serinc2,230779:down Ceacam1,26365:up Sfrp2,20319:up Syt13,80976:up S100a1,20193:up Ice1,218333:down Mrc1,17533:up Ccl2,20296:up Ednrb,13618:up Mmp13,17386:up Slc29a1,63959:up Gpm6b,14758:up Clec4n,56620:up Steap1,70358:down Postn,50706:down Cdo1,12583:up Ptx3,19288:up Hvcn1,74096:up Akr1c18,105349:up Fabp5,16592:up Ncam1,17967:down Ccl12,20293:up Bmpr1a,12166:down Ccl4,20303:up Ank,11732:down Creb3l1,26427:down Mrc2,17534:down Il1rl1,17082:down Inhba,16323:down Ccl3,20302:up Vegfa,22339:down Serpine2,20720:up Anpep,16790:up Kdelr3,105785:down Pparg,19016:up Tnf,21926:up Fxyd1,56188:up Glp1r,14652:down Fgfr1,14182:down Lpl,16956:up Hmox1,15368:up Cd4,12504:up Ptgs2,19225:down Grem1,23892:up Kcnj15,16516:down Mcoln3,171166:up Emb,13723:up Enpp1,18605:down |
| negative regulation of inflammatory response                                                                                            | GO:0050728 | 1.48E-02 | 5.58E-02 | Ctla2a,13024:down Pparg,19016:up C1qtnf3,81799:down Aoah,27052:up Cx3cr1,13051:down Adipoq,11450:up                                                                                                                                                                                                                                                                                                                                                                                                                                                                                                                                                                                                                                                                                                                                                                                                                                                                                                                                                                                                                                                                                                                                                                                                                                                                  |
| regulation of adaptive immune response based on somatic recombination of immune receptors built from immunoglobulin superfamily domains | GO:0002822 | 1.48E-02 | 5.58E-02 | Tnf,21926:up Cd24a,12484:down Cd4,12504:up C3,12266:up Tfrc,22042:up Il1rl1,17082:down                                                                                                                                                                                                                                                                                                                                                                                                                                                                                                                                                                                                                                                                                                                                                                                                                                                                                                                                                                                                                                                                                                                                                                                                                                                                               |
| regulation of amine transport                                                                                                           | GO:0051952 | 1.49E-02 | 5.60E-02 | Tnf,21926:up Cxc12,20315:up Htr2a,15558:down Il1rn,16181:up Sncc,20618:up                                                                                                                                                                                                                                                                                                                                                                                                                                                                                                                                                                                                                                                                                                                                                                                                                                                                                                                                                                                                                                                                                                                                                                                                                                                                                            |
| regulation of cell-matrix adhesion                                                                                                      | GO:0001952 | 1.49E-02 | 5.60E-02 | Gpm6b,14758:up Postn,50706:down Vegfa,22339:down Grem1,23892:up Ninj1,18081:up                                                                                                                                                                                                                                                                                                                                                                                                                                                                                                                                                                                                                                                                                                                                                                                                                                                                                                                                                                                                                                                                                                                                                                                                                                                                                       |
| regulation of small GTPase mediated signal transduction                                                                                 | GO:0051056 | 1.51E-02 | 5.65E-02 | Ccl9,20308:up Ccl6,20305:up Wnt5a,22418:down Ccl7,20306:up Ccl2,20296:up Ccl12,20293:up Ccl4,20303:up Ccl3,20302:up Col3a1,12825:down Igf1,16000:up Ccl8,20307:up Tgfb2,21808:down Kitl,17311:up                                                                                                                                                                                                                                                                                                                                                                                                                                                                                                                                                                                                                                                                                                                                                                                                                                                                                                                                                                                                                                                                                                                                                                     |
| regulation of keratinocyte proliferation                                                                                                | GO:0010837 | 1.51E-02 | 5.65E-02 | Vdr,22337:down Has2,15117:down Cd109,235505:down                                                                                                                                                                                                                                                                                                                                                                                                                                                                                                                                                                                                                                                                                                                                                                                                                                                                                                                                                                                                                                                                                                                                                                                                                                                                                                                     |
| protein kinase C signaling                                                                                                              | GO:0070528 | 1.51E-02 | 5.65E-02 | Htr2b,15559:down Wnt5a,22418:down Vegfa,22339:down                                                                                                                                                                                                                                                                                                                                                                                                                                                                                                                                                                                                                                                                                                                                                                                                                                                                                                                                                                                                                                                                                                                                                                                                                                                                                                                   |
| negative regulation of lymphocyte mediated immunity                                                                                     | GO:0002707 | 1.51E-02 | 5.65E-02 | Ceacam1,26365:up Clec2d,93694:up Igf2,16002:up                                                                                                                                                                                                                                                                                                                                                                                                                                                                                                                                                                                                                                                                                                                                                                                                                                                                                                                                                                                                                                                                                                                                                                                                                                                                                                                       |
| apoptotic process involved in morphogenesis                                                                                             | GO:0060561 | 1.51E-02 | 5.65E-02 | Vdr,22337:down Tgfb2,21808:down Tgfb3,21814:up                                                                                                                                                                                                                                                                                                                                                                                                                                                                                                                                                                                                                                                                                                                                                                                                                                                                                                                                                                                                                                                                                                                                                                                                                                                                                                                       |
| single-organism carbohydrate metabolic process                                                                                          | GO:0044723 | 1.55E-02 | 5.79E-02 | Igfbp4,16010:up Aoah,27052:up Sord,20322:up Htr2a,15558:down Igfbp3,16009:up Igf2,16002:up Man2a2,140481:up Tnf,21926:up Fabp5,16592:up Has2,15117:down C1qtnf3,81799:down Adipoq,11450:up Igf1,16000:up Chst11,58250:down Vegfb,22340:up Sdf2l1,64136:up Enpp1,18605:down                                                                                                                                                                                                                                                                                                                                                                                                                                                                                                                                                                                                                                                                                                                                                                                                                                                                                                                                                                                                                                                                                           |
| positive regulation of lymphocyte activation                                                                                            | GO:0051251 | 1.56E-02 | 5.82E-02 | Gas6,14456:up Cd24a,12484:down Ccl2,20296:up Cd4,12504:up Tfrc,22042:up Igf1,16000:up Ceacam1,26365:up Igf2,16002:up Tnfsf9,21950:up                                                                                                                                                                                                                                                                                                                                                                                                                                                                                                                                                                                                                                                                                                                                                                                                                                                                                                                                                                                                                                                                                                                                                                                                                                 |
| endothelial cell differentiation                                                                                                        | GO:0045446 | 1.56E-02 | 5.84E-02 | Ceacam1,26365:up Tnf,21926:up Vegfa,22339:down Stc1,20855:up Bmp4,12159:up                                                                                                                                                                                                                                                                                                                                                                                                                                                                                                                                                                                                                                                                                                                                                                                                                                                                                                                                                                                                                                                                                                                                                                                                                                                                                           |
| positive regulation of adaptive immune response                                                                                         | GO:0002821 | 1.56E-02 | 5.84E-02 | Tnf,21926:up Cd24a,12484:down Cd4,12504:up C3,12266:up Tfrc,22042:up                                                                                                                                                                                                                                                                                                                                                                                                                                                                                                                                                                                                                                                                                                                                                                                                                                                                                                                                                                                                                                                                                                                                                                                                                                                                                                 |

|                                                                                             |             |          |          |                                                                                                                                                                                                                                                                                                                                                                                                                                                                                                                                                                                                                         |
|---------------------------------------------------------------------------------------------|-------------|----------|----------|-------------------------------------------------------------------------------------------------------------------------------------------------------------------------------------------------------------------------------------------------------------------------------------------------------------------------------------------------------------------------------------------------------------------------------------------------------------------------------------------------------------------------------------------------------------------------------------------------------------------------|
| positive regulation of nucleobase-containing compound metabolic process                     | GO:0045935  | 1.59E-02 | 5.84E-02 | Fstl3,83554:down Ice1,218333:down Adm,11535:up Pdgfc,54635:down Epas1,13819:up Lyl1,17095:up Sdpr,20324:down Igf3,16009:up Trf,22041:up Wnt5a,22418:down Bmpr1a,12166:down Bmp4,12159:up Igf1,16000:up Ret,19713:up Plpp3,67916:up Ptgir,19222:up Creb3l1,26427:down Fgfr2,14183:up Kitl,17311:up Prl2c2,18811:up Ras11a,68895:up Inhba,16323:down Ccl3,20302:up Vdr,22337:down Vegfa,22339:down Htr2a,15558:down Igf2,16002:up Slc40a1,53945:up Pparg,19016:up Tnf,21926:up Glp1r,14652:down Egfr,13649:down Fgfr1,14182:down Sfrp1,20377:up Tgfb3,21814:up Tfrc,22042:up Grem1,23892:up Sfrp2,20319:up Npnt,114249:up |
| regulation of vesicle-mediated transport                                                    | GO:0060627  | 1.60E-02 | 5.84E-02 | Tnf,21926:up Pparg,19016:up Gas6,14456:up Trf,22041:up Ptx3,19288:up Ncam1,17967:down Hmox1,15368:up Wnt5a,22418:down Sfrp4,20379:up Ccl2,20296:up C3,12266:up Grem1,23892:up Adipoq,11450:up Vegfa,22339:down                                                                                                                                                                                                                                                                                                                                                                                                          |
| regulation of tumor necrosis factor production                                              | GO:0032680  | 1.61E-02 | 5.84E-02 | Gas6,14456:up Ccl2,20296:up Errfi1,74155:down Ccl4,20303:up Ccl3,20302:up Adipoq,11450:up                                                                                                                                                                                                                                                                                                                                                                                                                                                                                                                               |
| axon extension                                                                              | GO:0048675  | 1.61E-02 | 5.84E-02 | Tnfrsf12a,27279:down Plxnd1,67784:up Cxcl12,20315:up Wnt5a,22418:down Vegfa,22339:down Sema7a,20361:down                                                                                                                                                                                                                                                                                                                                                                                                                                                                                                                |
| regulation of chronic inflammatory response                                                 | GO:0002676  | 1.61E-02 | 5.84E-02 | Tnf,21926:up Cx3cr1,13051:down                                                                                                                                                                                                                                                                                                                                                                                                                                                                                                                                                                                          |
| negative regulation of JUN kinase activity                                                  | GO:0043508  | 1.61E-02 | 5.84E-02 | Sfrp2,20319:up Sfrp1,20377:up                                                                                                                                                                                                                                                                                                                                                                                                                                                                                                                                                                                           |
| nucleoside triphosphate catabolic process                                                   | GO:0009143  | 1.61E-02 | 5.84E-02 | Enpp1,18605:down Enpp3,209558:down                                                                                                                                                                                                                                                                                                                                                                                                                                                                                                                                                                                      |
| olfactory bulb interneuron differentiation                                                  | GO:0021889  | 1.61E-02 | 5.84E-02 | Fgfr1,14182:down Wnt5a,22418:down                                                                                                                                                                                                                                                                                                                                                                                                                                                                                                                                                                                       |
| positive regulation of DNA-dependent DNA replication                                        | GO:2000105  | 1.61E-02 | 5.84E-02 | Fgfr1,14182:down Bmp4,12159:up                                                                                                                                                                                                                                                                                                                                                                                                                                                                                                                                                                                          |
| regulation of type B pancreatic cell proliferation                                          | GO:0061469  | 1.61E-02 | 5.84E-02 | Sfrp1,20377:up Errfi1,74155:down                                                                                                                                                                                                                                                                                                                                                                                                                                                                                                                                                                                        |
| negative regulation of tumor necrosis factor-mediated signaling pathway                     | GO:0010804  | 1.61E-02 | 5.84E-02 | Gas6,14456:up Adipoq,11450:up                                                                                                                                                                                                                                                                                                                                                                                                                                                                                                                                                                                           |
| pulmonary valve morphogenesis                                                               | GO:0003184  | 1.61E-02 | 5.84E-02 | Tgfb2,21808:down Bmp4,12159:up                                                                                                                                                                                                                                                                                                                                                                                                                                                                                                                                                                                          |
| response to lithium ion                                                                     | GO:0010226  | 1.61E-02 | 5.84E-02 | Pparg,19016:up Fabp4,11770:up                                                                                                                                                                                                                                                                                                                                                                                                                                                                                                                                                                                           |
| positive regulation of humoral immune response                                              | GO:0002922  | 1.61E-02 | 5.84E-02 | Tnf,21926:up C3,12266:up                                                                                                                                                                                                                                                                                                                                                                                                                                                                                                                                                                                                |
| cellular response to lithium ion                                                            | GO:00071285 | 1.61E-02 | 5.84E-02 | Pparg,19016:up Fabp4,11770:up                                                                                                                                                                                                                                                                                                                                                                                                                                                                                                                                                                                           |
| regulation of chemokine biosynthetic process                                                | GO:0045073  | 1.61E-02 | 5.84E-02 | Tnf,21926:up Wnt5a,22418:down                                                                                                                                                                                                                                                                                                                                                                                                                                                                                                                                                                                           |
| polarized epithelial cell differentiation                                                   | GO:0030859  | 1.61E-02 | 5.84E-02 | Ptk7,71461:down Wnt5a,22418:down                                                                                                                                                                                                                                                                                                                                                                                                                                                                                                                                                                                        |
| negative regulation of vasoconstriction                                                     | GO:0045906  | 1.61E-02 | 5.84E-02 | Adm,11535:up Mmp2,17390:down                                                                                                                                                                                                                                                                                                                                                                                                                                                                                                                                                                                            |
| ferric iron transport                                                                       | GO:0015682  | 1.61E-02 | 5.84E-02 | Trf,22041:up Tfrc,22042:up                                                                                                                                                                                                                                                                                                                                                                                                                                                                                                                                                                                              |
| regulation of transcription from RNA polymerase II promoter in response to oxidative stress | GO:0043619  | 1.61E-02 | 5.84E-02 | Hmox1,15368:up Epas1,13819:up                                                                                                                                                                                                                                                                                                                                                                                                                                                                                                                                                                                           |
| negative regulation of gluconeogenesis                                                      | GO:0045721  | 1.61E-02 | 5.84E-02 | C1qtnf3,81799:down Adipoq,11450:up                                                                                                                                                                                                                                                                                                                                                                                                                                                                                                                                                                                      |
| anatomical structure regression                                                             | GO:0060033  | 1.61E-02 | 5.84E-02 | Bmpr1a,12166:down Ninj1,18081:up                                                                                                                                                                                                                                                                                                                                                                                                                                                                                                                                                                                        |
| chemokine biosynthetic process                                                              | GO:0042033  | 1.61E-02 | 5.84E-02 | Tnf,21926:up Wnt5a,22418:down                                                                                                                                                                                                                                                                                                                                                                                                                                                                                                                                                                                           |
| chemokine (C-X-C motif) ligand 2 production                                                 | GO:0072567  | 1.61E-02 | 5.84E-02 | Tnf,21926:up Postn,50706:down                                                                                                                                                                                                                                                                                                                                                                                                                                                                                                                                                                                           |
| negative regulation of platelet aggregation                                                 | GO:0090331  | 1.61E-02 | 5.84E-02 | Ceacam1,26365:up Serpine2,20720:up                                                                                                                                                                                                                                                                                                                                                                                                                                                                                                                                                                                      |
| regulation of cAMP-dependent protein kinase activity                                        | GO:2000479  | 1.61E-02 | 5.84E-02 | Prkar2b,19088:up Adipoq,11450:up                                                                                                                                                                                                                                                                                                                                                                                                                                                                                                                                                                                        |
| regulation of sequestering of triglyceride                                                  | GO:0010889  | 1.61E-02 | 5.84E-02 | Pparg,19016:up Lpl,16956:up                                                                                                                                                                                                                                                                                                                                                                                                                                                                                                                                                                                             |
| trivalent inorganic anion homeostasis                                                       | GO:0072506  | 1.61E-02 | 5.84E-02 | Sfrp4,20379:up Enpp1,18605:down                                                                                                                                                                                                                                                                                                                                                                                                                                                                                                                                                                                         |
| pulmonary valve development                                                                 | GO:0003177  | 1.61E-02 | 5.84E-02 | Tgfb2,21808:down Bmp4,12159:up                                                                                                                                                                                                                                                                                                                                                                                                                                                                                                                                                                                          |

|                                                                                          |            |          |          |                                                                                                                                                                                                                                                                                                                                                                                                                                                                                                                                                                                                                                                                                                                                                                                                                                                                                                                                                                                                                                                                                                                                                                                                                                                                                                                                                                                                        |
|------------------------------------------------------------------------------------------|------------|----------|----------|--------------------------------------------------------------------------------------------------------------------------------------------------------------------------------------------------------------------------------------------------------------------------------------------------------------------------------------------------------------------------------------------------------------------------------------------------------------------------------------------------------------------------------------------------------------------------------------------------------------------------------------------------------------------------------------------------------------------------------------------------------------------------------------------------------------------------------------------------------------------------------------------------------------------------------------------------------------------------------------------------------------------------------------------------------------------------------------------------------------------------------------------------------------------------------------------------------------------------------------------------------------------------------------------------------------------------------------------------------------------------------------------------------|
| positive regulation of heat generation                                                   | GO:0031652 | 1.61E-02 | 5.84E-02 | Tnf,21926:up Ptgs2,19225:down                                                                                                                                                                                                                                                                                                                                                                                                                                                                                                                                                                                                                                                                                                                                                                                                                                                                                                                                                                                                                                                                                                                                                                                                                                                                                                                                                                          |
| adhesion of symbiont to host                                                             | GO:0044406 | 1.61E-02 | 5.84E-02 | Gas6,14456:up Lrrc15,74488:down                                                                                                                                                                                                                                                                                                                                                                                                                                                                                                                                                                                                                                                                                                                                                                                                                                                                                                                                                                                                                                                                                                                                                                                                                                                                                                                                                                        |
| phosphate ion homeostasis                                                                | GO:0055062 | 1.61E-02 | 5.84E-02 | Sfrp4,20379:up Enpp1,18605:down                                                                                                                                                                                                                                                                                                                                                                                                                                                                                                                                                                                                                                                                                                                                                                                                                                                                                                                                                                                                                                                                                                                                                                                                                                                                                                                                                                        |
| modulation by virus of host process                                                      | GO:0019054 | 1.61E-02 | 5.84E-02 | Ceacam1,26365:up Cd4,12504:up                                                                                                                                                                                                                                                                                                                                                                                                                                                                                                                                                                                                                                                                                                                                                                                                                                                                                                                                                                                                                                                                                                                                                                                                                                                                                                                                                                          |
| regulation of cholesterol storage                                                        | GO:0010885 | 1.61E-02 | 5.84E-02 | Pparg,19016:up Lpl,16956:up                                                                                                                                                                                                                                                                                                                                                                                                                                                                                                                                                                                                                                                                                                                                                                                                                                                                                                                                                                                                                                                                                                                                                                                                                                                                                                                                                                            |
| Peyer's patch development                                                                | GO:0048541 | 1.61E-02 | 5.84E-02 | Ceacam1,26365:up Ret,19713:up                                                                                                                                                                                                                                                                                                                                                                                                                                                                                                                                                                                                                                                                                                                                                                                                                                                                                                                                                                                                                                                                                                                                                                                                                                                                                                                                                                          |
| mesenchymal to epithelial transition involved in metanephros morphogenesis               | GO:0003337 | 1.61E-02 | 5.84E-02 | Grem1,23892:up Bmp4,12159:up                                                                                                                                                                                                                                                                                                                                                                                                                                                                                                                                                                                                                                                                                                                                                                                                                                                                                                                                                                                                                                                                                                                                                                                                                                                                                                                                                                           |
| regulation of complement activation                                                      | GO:0030449 | 1.61E-02 | 5.84E-02 | Serping1,12258:up C3,12266:up                                                                                                                                                                                                                                                                                                                                                                                                                                                                                                                                                                                                                                                                                                                                                                                                                                                                                                                                                                                                                                                                                                                                                                                                                                                                                                                                                                          |
| positive regulation of myeloid leukocyte cytokine production involved in immune response | GO:0061081 | 1.61E-02 | 5.84E-02 | Wnt5a,22418:down Sema7a,20361:down                                                                                                                                                                                                                                                                                                                                                                                                                                                                                                                                                                                                                                                                                                                                                                                                                                                                                                                                                                                                                                                                                                                                                                                                                                                                                                                                                                     |
| trivalent inorganic cation transport                                                     | GO:0072512 | 1.61E-02 | 5.84E-02 | Trf,22041:up Tfrc,22042:up                                                                                                                                                                                                                                                                                                                                                                                                                                                                                                                                                                                                                                                                                                                                                                                                                                                                                                                                                                                                                                                                                                                                                                                                                                                                                                                                                                             |
| regulation of synaptic transmission, glutamatergic                                       | GO:0051966 | 1.63E-02 | 5.84E-02 | Egfr,13649:down Htr2a,15558:down Ptgs2,19225:down Serpine2,20720:up                                                                                                                                                                                                                                                                                                                                                                                                                                                                                                                                                                                                                                                                                                                                                                                                                                                                                                                                                                                                                                                                                                                                                                                                                                                                                                                                    |
| glomerulus development                                                                   | GO:0032835 | 1.63E-02 | 5.84E-02 | Ret,19713:up Sulf1,240725:down Bmp4,12159:up Adipoq,11450:up                                                                                                                                                                                                                                                                                                                                                                                                                                                                                                                                                                                                                                                                                                                                                                                                                                                                                                                                                                                                                                                                                                                                                                                                                                                                                                                                           |
| positive regulation of extrinsic apoptotic signaling pathway                             | GO:2001238 | 1.63E-02 | 5.84E-02 | Tnfrsf12a,27279:down Sfrp1,20377:up Tgfb2,21808:down Inhba,16323:down                                                                                                                                                                                                                                                                                                                                                                                                                                                                                                                                                                                                                                                                                                                                                                                                                                                                                                                                                                                                                                                                                                                                                                                                                                                                                                                                  |
| axis specification                                                                       | GO:0009798 | 1.64E-02 | 5.84E-02 | Sfrp1,20377:up Wnt5a,22418:down Bmpr1a,12166:down Stc1,20855:up Bmp4,12159:up                                                                                                                                                                                                                                                                                                                                                                                                                                                                                                                                                                                                                                                                                                                                                                                                                                                                                                                                                                                                                                                                                                                                                                                                                                                                                                                          |
| response to nicotine                                                                     | GO:0035094 | 1.65E-02 | 5.84E-02 | Tnf,21926:up Hmox1,15368:up Igf2,16002:up                                                                                                                                                                                                                                                                                                                                                                                                                                                                                                                                                                                                                                                                                                                                                                                                                                                                                                                                                                                                                                                                                                                                                                                                                                                                                                                                                              |
| interleukin-1 secretion                                                                  | GO:0050701 | 1.65E-02 | 5.84E-02 | Gas6,14456:up Wnt5a,22418:down Ccl3,20302:up                                                                                                                                                                                                                                                                                                                                                                                                                                                                                                                                                                                                                                                                                                                                                                                                                                                                                                                                                                                                                                                                                                                                                                                                                                                                                                                                                           |
| apoptotic cell clearance                                                                 | GO:0043277 | 1.65E-02 | 5.84E-02 | Gas6,14456:up Ccl2,20296:up C3,12266:up                                                                                                                                                                                                                                                                                                                                                                                                                                                                                                                                                                                                                                                                                                                                                                                                                                                                                                                                                                                                                                                                                                                                                                                                                                                                                                                                                                |
| regulation of cell adhesion mediated by integrin                                         | GO:0033628 | 1.65E-02 | 5.84E-02 | Cd24a,12484:down Ret,19713:up Tgfb2,21808:down                                                                                                                                                                                                                                                                                                                                                                                                                                                                                                                                                                                                                                                                                                                                                                                                                                                                                                                                                                                                                                                                                                                                                                                                                                                                                                                                                         |
| lactation                                                                                | GO:0007595 | 1.65E-02 | 5.84E-02 | Vdr,22337:down Vegfa,22339:down Cdo1,12583:up                                                                                                                                                                                                                                                                                                                                                                                                                                                                                                                                                                                                                                                                                                                                                                                                                                                                                                                                                                                                                                                                                                                                                                                                                                                                                                                                                          |
| tumor necrosis factor production                                                         | GO:0032640 | 1.67E-02 | 5.84E-02 | Gas6,14456:up Ccl2,20296:up Errfi1,74155:down Ccl4,20303:up Ccl3,20302:up Adipoq,11450:up                                                                                                                                                                                                                                                                                                                                                                                                                                                                                                                                                                                                                                                                                                                                                                                                                                                                                                                                                                                                                                                                                                                                                                                                                                                                                                              |
| reactive oxygen species metabolic process                                                | GO:0072593 | 1.69E-02 | 5.84E-02 | Tnf,21926:up Akr1c18,105349:up Ptx3,19288:up Egfr,13649:down Hp,15439:up Ptgs2,19225:down Igf1,16000:up Pxdn,69675:down Ddah1,69219:down                                                                                                                                                                                                                                                                                                                                                                                                                                                                                                                                                                                                                                                                                                                                                                                                                                                                                                                                                                                                                                                                                                                                                                                                                                                               |
| neuron projection extension                                                              | GO:1990138 | 1.69E-02 | 5.84E-02 | Tnfrsf12a,27279:down Plxnd1,67784:up Cxcl12,20315:up Postn,50706:down Wnt5a,22418:down Vegfa,22339:down Sema7a,20361:down                                                                                                                                                                                                                                                                                                                                                                                                                                                                                                                                                                                                                                                                                                                                                                                                                                                                                                                                                                                                                                                                                                                                                                                                                                                                              |
| regulation of lymphocyte activation                                                      | GO:0051249 | 1.72E-02 | 5.84E-02 | Gas6,14456:up Cd24a,12484:down Sfrp1,20377:up Ccl2,20296:up Cd4,12504:up Tfrc,22042:up Igf1,16000:up Bmp4,12159:up Ctla2a,13024:down Ceacam1,26365:up Igf2,16002:up Tnfsf9,21950:up                                                                                                                                                                                                                                                                                                                                                                                                                                                                                                                                                                                                                                                                                                                                                                                                                                                                                                                                                                                                                                                                                                                                                                                                                    |
| regulation of innate immune response                                                     | GO:0045088 | 1.72E-02 | 5.84E-02 | Tnf,21926:up Pparg,19016:up Clec2d,93694:up Wnt5a,22418:down Ceacam1,26365:up Serping1,12258:up Mmp2,17390:down Igf2,16002:up                                                                                                                                                                                                                                                                                                                                                                                                                                                                                                                                                                                                                                                                                                                                                                                                                                                                                                                                                                                                                                                                                                                                                                                                                                                                          |
| positive regulation of reproductive process                                              | GO:2000243 | 1.73E-02 | 5.84E-02 | Wnt5a,22418:down Inhba,16323:down Ednrb,13618:up Plat,18791:down                                                                                                                                                                                                                                                                                                                                                                                                                                                                                                                                                                                                                                                                                                                                                                                                                                                                                                                                                                                                                                                                                                                                                                                                                                                                                                                                       |
| establishment of localization                                                            | GO:0051234 | 1.74E-02 | 5.84E-02 | Adm,11535:up Sfrp4,20379:up C3,12266:up Ankrd1,107765:down Trf,22041:up Cd24a,12484:down Wnt5a,22418:down Stc1,20855:up Il1rn,16181:up Maob,109731:up Adipoq,11450:up Bmp4,12159:up Igf1,16000:up Crabp2,12904:down Mcoln2,68279:up Tgfb2,21808:down Fgfr2,14183:up Clec4e,56619:up Htr2b,15559:down Mfsd12,73822:up Vdr,22337:down Fabp4,11770:up Fam132b,227358:down Cxcl12,20315:up Htr2a,15558:down Slc16a4,229699:down Slc40a1,53945:up Gas6,14456:up Egfr,13649:down Sec23a,20334:down Sfrp1,20377:up C1qtnf3,81799:down Tfrc,22042:up Snca,20618:up Fxyd2,11936:up Serinc2,230779:down Ceacam1,26365:up Sfrp2,20319:up Npnt,114249:up Sytl3,80976:up S100a1,20193:up Iccl1,218333:down Mrc1,17533:up Ccl2,20296:up Ednrb,13618:up Mmp13,17386:up Slc29a1,63959:up Gpm6b,14758:up Clec4n,56620:up Steap1,70358:down Postn,50706:down Cdo1,12583:up Ptx3,19288:up Hvcn1,74096:up Akr1c18,105349:up Fabp5,16592:up Ncam1,17967:down Ccl12,20293:up Bmpr1a,12166:down Ccl4,20303:up Ank,11732:down Creb3l1,26427:down Mrc2,17534:down Il1r1,17082:down Inhba,16323:down Ccl3,20302:up Vegfa,22339:down Serpine2,20720:up Lrrc15,74488:down Anpep,16790:up Kdelr3,105785:down Pparg,19016:up Tnf,21926:up Fxyd1,56188:up Glp1r,14652:down Fgfr1,14182:down Lpl,16956:up Hmox1,15368:up Cd4,12504:up Ptgs2,19225:down Grem1,23892:up Kcnj15,16516:down Mcoln3,171166:up Emb,13723:up Enpp1,18605:down |
| regulation of tumor necrosis factor superfamily cytokine production                      | GO:1903555 | 1.74E-02 | 5.84E-02 | Gas6,14456:up Ccl2,20296:up Errfi1,74155:down Ccl4,20303:up Ccl3,20302:up Adipoq,11450:up                                                                                                                                                                                                                                                                                                                                                                                                                                                                                                                                                                                                                                                                                                                                                                                                                                                                                                                                                                                                                                                                                                                                                                                                                                                                                                              |

|                                                                                               |            |          |          |                                                                                                                                                                                                                                                                                                                                                                                                                                                                                                                                                                                                                                                                                                                                                                                                                                                                                                                                                                                                                                                                                                                                                                                                                                                                                                                                                                                                                                                                                                                                                                                                                                                                                                                                                                                                                                                                                                                                                                                                                                                                                                                                                                                                                                                                                                                                                                                                                                                                                                                                                                                                                                                                                                                                                                                                                                                                                                                                                       |
|-----------------------------------------------------------------------------------------------|------------|----------|----------|-------------------------------------------------------------------------------------------------------------------------------------------------------------------------------------------------------------------------------------------------------------------------------------------------------------------------------------------------------------------------------------------------------------------------------------------------------------------------------------------------------------------------------------------------------------------------------------------------------------------------------------------------------------------------------------------------------------------------------------------------------------------------------------------------------------------------------------------------------------------------------------------------------------------------------------------------------------------------------------------------------------------------------------------------------------------------------------------------------------------------------------------------------------------------------------------------------------------------------------------------------------------------------------------------------------------------------------------------------------------------------------------------------------------------------------------------------------------------------------------------------------------------------------------------------------------------------------------------------------------------------------------------------------------------------------------------------------------------------------------------------------------------------------------------------------------------------------------------------------------------------------------------------------------------------------------------------------------------------------------------------------------------------------------------------------------------------------------------------------------------------------------------------------------------------------------------------------------------------------------------------------------------------------------------------------------------------------------------------------------------------------------------------------------------------------------------------------------------------------------------------------------------------------------------------------------------------------------------------------------------------------------------------------------------------------------------------------------------------------------------------------------------------------------------------------------------------------------------------------------------------------------------------------------------------------------------------|
| sulfur compound metabolic process                                                             | GO:0006790 | 1.74E-02 | 5.84E-02 | Mamdc2,71738:down Ggt5,23887:up Sulf1,240725:down lgf1,16000:up Chst11,58250:down Gstm1,14862:up Gstt1,14871:up Hpse,15442:up Enpp1,18605:down Cdo1,12583:up                                                                                                                                                                                                                                                                                                                                                                                                                                                                                                                                                                                                                                                                                                                                                                                                                                                                                                                                                                                                                                                                                                                                                                                                                                                                                                                                                                                                                                                                                                                                                                                                                                                                                                                                                                                                                                                                                                                                                                                                                                                                                                                                                                                                                                                                                                                                                                                                                                                                                                                                                                                                                                                                                                                                                                                          |
| metabolic process                                                                             | GO:0008152 | 1.75E-02 | 5.84E-02 | Fstl3,83554:down lgfbp4,16010:up Adm,11535:up Flrt2,399558:down Tfec,21426:up Sfrp4,20379:up Serpinh1,12406:down Lyl1,17095:up Gstt1,14871:up Blvrb,233016:up lgfbp3,16009:up Plk2,20620:down Cd24a,12484:down Mme,17380:up Fkbp14,231997:down Il1rn,16181:up Maob,109731:up Bmp4,12159:up Hps e,15442:up Ptgir,19222:up Fgfr2,14183:up Htr2b,15559:down Dram1,71712:up Ccl6,20305:up Sipi,20568:up Aspn,66695:down Mt2,17750:up Fam132b,227358:down Nabp1,109019:down Mmp2,17390:down Oas3,246727:up Pappa,18491:down Slc40a1,53945:up Egfr,13649:down Alpl,11647:up C1rb,667277:up Tfrc,22042:up Ccl8,20307:up Gstm1,14862:up Serpina3g,20715:up Fam20a,208659:down Mt1,17748:up Aldh1a2,19378:up Ccl2,20296:up Ednrb,13618:up Ampd3,11717:up Mmp13,17386:up Htra3,78558:down Uchl5,56207:up Sord,20322:up Steap1,70358:down Enpp3,209558:down Cdo1,12583:up Dok2,13449:up Mamdc2,71738:down Ptx3,19288:up Ccl4,20303:up Chst11,58250:down Vegfb,22340:up Aldh1a3,56847:down Plpp3,67916:up Mrc2,17534:down Ccl9,20308:up Inhba,16323:down Gsta4,14860:up Bnc2,242509:down Tfpi2,21789:down Crlf1,12931:down C1s1,50908:up Plod2,26432:down Vegfa,22339:down Gfpt2,14584:down Serpine2,20720:up Cbr2,12409:up Nxn,18230:down lgf2,16002:up Tnf,21926:up Fgfr1,14182:down Lpl,16956:up Sulf1,240725:down Cd4,12504:up Col3a1,12825:down Tbx15,21384:down Serping1,12258:up Uck2,80914:down Enpp1,18605:down Hpgd,15446:up C3,12266:up Enpp5,83965:up Ankrd1,107765:down Cd109,235505:down Ggt5,23887:up Loxl2,94352:down Trf,22041:up Loxl3,16950:down Adam12,11489:down Wnt5a,22418:down Mark1,226778:up Adipoq,11450:up Hal,15109:up lgf1,16000:up Crabp2,12904:down Tgfb2,21808:down F3,14066:up Adamts4,240913:down Kng1,16644:up Prl2c2,18811:up Efemp1,216616:up Saa3,20210:up Gdpd1,66569:up Vdr,22337:down Pdia5,72599:down Fabp4,11770:up Htr2a,15558:down Gas6,14456:up Col11a1,12814:down Sfrp1,20377:up C1qtnf3,81799:down Tgfb3,21814:up Serinc2,230779:down Tll1,21892:down Ceacam1,26365:up Sfrp2,20319:up Pxdn,69675:down Pamr1,210622:up Tnfrsf11b,18383:up Prkar2b,19088:up Npnt,114249:up S100a1,20193:up Ice1,218333:down Neur3,214854:down Ccl7,20306:up Pdzrn3,55983:down Pdgfc,54635:down Cst7,13011:up Sema7a,20361:down Epa s1,13819:up Marc1,66112:up Ddah1,69219:down Sdpr,20324:down Fkbp10,14230:down Npl,74091:up Man2a2,140481:up Akr1c18,105349:up Fabp5,16592:up Ccl12,20293:up Bmpr1a,12166:down Klk1b11,16613:up Tnc,21923:down Gatm,67092:down Ret,19713:up Prg4,96875:down Sdf211,64136:up Pdxk,216134:up C1s2,317677:up Creb3l1,26427:down Kitl,17311:up P4ha1,18451:down Hp,15439:up Aoah,27052:up Rasl11a,68895:up Plat,18791:down Ccl3,20302:up Ctla2a,13024:down Srpx2,68792:down Adamts12,239337:down Lrrc15,74488:down Anpep,16790:up Pparg,19016:up Lmcd1,30937:up Glp1r,14652:down Hmox1,15368:up Has2,15117:down Ptgs2,19225:down Grem1,23892:up Phf11d,219132:up Col5a1,12831:down Errfi1,74155:down |
| palate development                                                                            | GO:0060021 | 1.80E-02 | 5.84E-02 | Wnt5a,22418:down Inhba,16323:down Bmpr1a,12166:down Tgfb3,21814:up Bnc2,242509:down                                                                                                                                                                                                                                                                                                                                                                                                                                                                                                                                                                                                                                                                                                                                                                                                                                                                                                                                                                                                                                                                                                                                                                                                                                                                                                                                                                                                                                                                                                                                                                                                                                                                                                                                                                                                                                                                                                                                                                                                                                                                                                                                                                                                                                                                                                                                                                                                                                                                                                                                                                                                                                                                                                                                                                                                                                                                   |
| amine transport                                                                               | GO:0015837 | 1.80E-02 | 5.84E-02 | Tnf,21926:up Cxcl12,20315:up Htr2a,15558:down Il1rn,16181:up Snccg,20618:up                                                                                                                                                                                                                                                                                                                                                                                                                                                                                                                                                                                                                                                                                                                                                                                                                                                                                                                                                                                                                                                                                                                                                                                                                                                                                                                                                                                                                                                                                                                                                                                                                                                                                                                                                                                                                                                                                                                                                                                                                                                                                                                                                                                                                                                                                                                                                                                                                                                                                                                                                                                                                                                                                                                                                                                                                                                                           |
| spleen trabecula formation                                                                    | GO:0060345 | 1.81E-02 | 5.84E-02 | Slc40a1,53945:up                                                                                                                                                                                                                                                                                                                                                                                                                                                                                                                                                                                                                                                                                                                                                                                                                                                                                                                                                                                                                                                                                                                                                                                                                                                                                                                                                                                                                                                                                                                                                                                                                                                                                                                                                                                                                                                                                                                                                                                                                                                                                                                                                                                                                                                                                                                                                                                                                                                                                                                                                                                                                                                                                                                                                                                                                                                                                                                                      |
| CMP metabolic process                                                                         | GO:0046035 | 1.81E-02 | 5.84E-02 | Uck2,80914:down                                                                                                                                                                                                                                                                                                                                                                                                                                                                                                                                                                                                                                                                                                                                                                                                                                                                                                                                                                                                                                                                                                                                                                                                                                                                                                                                                                                                                                                                                                                                                                                                                                                                                                                                                                                                                                                                                                                                                                                                                                                                                                                                                                                                                                                                                                                                                                                                                                                                                                                                                                                                                                                                                                                                                                                                                                                                                                                                       |
| negative regulation of metanephric comma-shaped body morphogenesis                            | GO:2000007 | 1.81E-02 | 5.84E-02 | Bmp4,12159:up                                                                                                                                                                                                                                                                                                                                                                                                                                                                                                                                                                                                                                                                                                                                                                                                                                                                                                                                                                                                                                                                                                                                                                                                                                                                                                                                                                                                                                                                                                                                                                                                                                                                                                                                                                                                                                                                                                                                                                                                                                                                                                                                                                                                                                                                                                                                                                                                                                                                                                                                                                                                                                                                                                                                                                                                                                                                                                                                         |
| positive regulation of activation of membrane attack complex                                  | GO:0019170 | 1.81E-02 | 5.84E-02 | C3,12266:up                                                                                                                                                                                                                                                                                                                                                                                                                                                                                                                                                                                                                                                                                                                                                                                                                                                                                                                                                                                                                                                                                                                                                                                                                                                                                                                                                                                                                                                                                                                                                                                                                                                                                                                                                                                                                                                                                                                                                                                                                                                                                                                                                                                                                                                                                                                                                                                                                                                                                                                                                                                                                                                                                                                                                                                                                                                                                                                                           |
| regulation of protein kinase D signaling                                                      | GO:1903570 | 1.81E-02 | 5.84E-02 | Vegfa,22339:down                                                                                                                                                                                                                                                                                                                                                                                                                                                                                                                                                                                                                                                                                                                                                                                                                                                                                                                                                                                                                                                                                                                                                                                                                                                                                                                                                                                                                                                                                                                                                                                                                                                                                                                                                                                                                                                                                                                                                                                                                                                                                                                                                                                                                                                                                                                                                                                                                                                                                                                                                                                                                                                                                                                                                                                                                                                                                                                                      |
| pentitol metabolic process                                                                    | GO:0019519 | 1.81E-02 | 5.84E-02 | Sord,20322:up                                                                                                                                                                                                                                                                                                                                                                                                                                                                                                                                                                                                                                                                                                                                                                                                                                                                                                                                                                                                                                                                                                                                                                                                                                                                                                                                                                                                                                                                                                                                                                                                                                                                                                                                                                                                                                                                                                                                                                                                                                                                                                                                                                                                                                                                                                                                                                                                                                                                                                                                                                                                                                                                                                                                                                                                                                                                                                                                         |
| negative regulation of branching involved in lung morphogenesis                               | GO:0061048 | 1.81E-02 | 5.84E-02 | Tnf,21926:up                                                                                                                                                                                                                                                                                                                                                                                                                                                                                                                                                                                                                                                                                                                                                                                                                                                                                                                                                                                                                                                                                                                                                                                                                                                                                                                                                                                                                                                                                                                                                                                                                                                                                                                                                                                                                                                                                                                                                                                                                                                                                                                                                                                                                                                                                                                                                                                                                                                                                                                                                                                                                                                                                                                                                                                                                                                                                                                                          |
| bud dilation involved in lung branching                                                       | GO:0060503 | 1.81E-02 | 5.84E-02 | Bmp4,12159:up                                                                                                                                                                                                                                                                                                                                                                                                                                                                                                                                                                                                                                                                                                                                                                                                                                                                                                                                                                                                                                                                                                                                                                                                                                                                                                                                                                                                                                                                                                                                                                                                                                                                                                                                                                                                                                                                                                                                                                                                                                                                                                                                                                                                                                                                                                                                                                                                                                                                                                                                                                                                                                                                                                                                                                                                                                                                                                                                         |
| mesodermal cell fate determination                                                            | GO:0007500 | 1.81E-02 | 5.84E-02 | Bmp4,12159:up                                                                                                                                                                                                                                                                                                                                                                                                                                                                                                                                                                                                                                                                                                                                                                                                                                                                                                                                                                                                                                                                                                                                                                                                                                                                                                                                                                                                                                                                                                                                                                                                                                                                                                                                                                                                                                                                                                                                                                                                                                                                                                                                                                                                                                                                                                                                                                                                                                                                                                                                                                                                                                                                                                                                                                                                                                                                                                                                         |
| canonical wnt signaling pathway involved in positive regulation of endothelial cell migration | GO:0044328 | 1.81E-02 | 5.84E-02 | Plpp3,67916:up                                                                                                                                                                                                                                                                                                                                                                                                                                                                                                                                                                                                                                                                                                                                                                                                                                                                                                                                                                                                                                                                                                                                                                                                                                                                                                                                                                                                                                                                                                                                                                                                                                                                                                                                                                                                                                                                                                                                                                                                                                                                                                                                                                                                                                                                                                                                                                                                                                                                                                                                                                                                                                                                                                                                                                                                                                                                                                                                        |
| intermediate mesoderm formation                                                               | GO:0048391 | 1.81E-02 | 5.84E-02 | Bmp4,12159:up                                                                                                                                                                                                                                                                                                                                                                                                                                                                                                                                                                                                                                                                                                                                                                                                                                                                                                                                                                                                                                                                                                                                                                                                                                                                                                                                                                                                                                                                                                                                                                                                                                                                                                                                                                                                                                                                                                                                                                                                                                                                                                                                                                                                                                                                                                                                                                                                                                                                                                                                                                                                                                                                                                                                                                                                                                                                                                                                         |
| dichloromethane metabolic process                                                             | GO:0018900 | 1.81E-02 | 5.84E-02 | Gstt1,14871:up                                                                                                                                                                                                                                                                                                                                                                                                                                                                                                                                                                                                                                                                                                                                                                                                                                                                                                                                                                                                                                                                                                                                                                                                                                                                                                                                                                                                                                                                                                                                                                                                                                                                                                                                                                                                                                                                                                                                                                                                                                                                                                                                                                                                                                                                                                                                                                                                                                                                                                                                                                                                                                                                                                                                                                                                                                                                                                                                        |
| L-xylitol catabolic process                                                                   | GO:0051160 | 1.81E-02 | 5.84E-02 | Sord,20322:up                                                                                                                                                                                                                                                                                                                                                                                                                                                                                                                                                                                                                                                                                                                                                                                                                                                                                                                                                                                                                                                                                                                                                                                                                                                                                                                                                                                                                                                                                                                                                                                                                                                                                                                                                                                                                                                                                                                                                                                                                                                                                                                                                                                                                                                                                                                                                                                                                                                                                                                                                                                                                                                                                                                                                                                                                                                                                                                                         |
| positive regulation of T cell homeostatic proliferation                                       | GO:0042103 | 1.81E-02 | 5.84E-02 | Cd24a,12484:down                                                                                                                                                                                                                                                                                                                                                                                                                                                                                                                                                                                                                                                                                                                                                                                                                                                                                                                                                                                                                                                                                                                                                                                                                                                                                                                                                                                                                                                                                                                                                                                                                                                                                                                                                                                                                                                                                                                                                                                                                                                                                                                                                                                                                                                                                                                                                                                                                                                                                                                                                                                                                                                                                                                                                                                                                                                                                                                                      |
| hematopoietic stem cell migration to bone marrow                                              | GO:0097241 | 1.81E-02 | 5.84E-02 | Gas6,14456:up                                                                                                                                                                                                                                                                                                                                                                                                                                                                                                                                                                                                                                                                                                                                                                                                                                                                                                                                                                                                                                                                                                                                                                                                                                                                                                                                                                                                                                                                                                                                                                                                                                                                                                                                                                                                                                                                                                                                                                                                                                                                                                                                                                                                                                                                                                                                                                                                                                                                                                                                                                                                                                                                                                                                                                                                                                                                                                                                         |
| paraxial mesoderm structural organization                                                     | GO:0048352 | 1.81E-02 | 5.84E-02 | Bmpr1a,12166:down                                                                                                                                                                                                                                                                                                                                                                                                                                                                                                                                                                                                                                                                                                                                                                                                                                                                                                                                                                                                                                                                                                                                                                                                                                                                                                                                                                                                                                                                                                                                                                                                                                                                                                                                                                                                                                                                                                                                                                                                                                                                                                                                                                                                                                                                                                                                                                                                                                                                                                                                                                                                                                                                                                                                                                                                                                                                                                                                     |



|                                                                                                                          |            |          |          |                      |
|--------------------------------------------------------------------------------------------------------------------------|------------|----------|----------|----------------------|
| regulation of renal albumin absorption                                                                                   | GO:2000532 | 1.81E-02 | 5.84E-02 | Adipoq,11450:up      |
| negative regulation of hepatocyte growth factor receptor signaling pathway                                               | GO:1902203 | 1.81E-02 | 5.84E-02 | Adamts12,239337:down |
| fibroblast growth factor receptor signaling pathway involved in positive regulation of cell proliferation in bone marrow | GO:0035604 | 1.81E-02 | 5.84E-02 | Fgfr2,14183:up       |
| positive regulation of chemokine (C-C motif) ligand 2 secretion                                                          | GO:1904209 | 1.81E-02 | 5.84E-02 | Postn,50706:down     |
| negative regulation of hydrogen peroxide catabolic process                                                               | GO:2000296 | 1.81E-02 | 5.84E-02 | Hp,15439:up          |
| regulation of oligodendrocyte apoptotic process                                                                          | GO:1900141 | 1.81E-02 | 5.84E-02 | Gas6,14456:up        |
| renal system segmentation                                                                                                | GO:0061150 | 1.81E-02 | 5.84E-02 | Bmp4,12159:up        |
| convergent extension involved in somitogenesis                                                                           | GO:0090246 | 1.81E-02 | 5.84E-02 | Sfrp1,20377:up       |
| chemokine receptor transport within lipid bilayer                                                                        | GO:0033606 | 1.81E-02 | 5.84E-02 | Cd24a,12484:down     |
| motogenic signaling involved in postnatal olfactory bulb interneuron migration                                           | GO:0021837 | 1.81E-02 | 5.84E-02 | Fgfr1,14182:down     |
| negative regulation of sodium-dependent phosphate transport                                                              | GO:2000119 | 1.81E-02 | 5.84E-02 | Sfrp4,20379:up       |
| negative regulation of chronic inflammatory response to non-antigenic stimulus                                           | GO:0002881 | 1.81E-02 | 5.84E-02 | Cx3cr1,13051:down    |
| intermediate mesodermal cell differentiation                                                                             | GO:0048392 | 1.81E-02 | 5.84E-02 | Bmp4,12159:up        |
| negative regulation of canonical Wnt signaling pathway involved in controlling type B pancreatic cell proliferation      | GO:2000080 | 1.81E-02 | 5.84E-02 | Sfrp1,20377:up       |
| tooth eruption                                                                                                           | GO:0044691 | 1.81E-02 | 5.84E-02 | Fam20a,208659:down   |
| BMP signaling pathway involved in nephric duct formation                                                                 | GO:0071893 | 1.81E-02 | 5.84E-02 | Bmp4,12159:up        |
| cellular response to chromate                                                                                            | GO:0071247 | 1.81E-02 | 5.84E-02 | Mt1,17748:up         |
| pyridoxal 5'-phosphate salvage                                                                                           | GO:0009443 | 1.81E-02 | 5.84E-02 | Pdxk,216134:up       |
| pentitol catabolic process                                                                                               | GO:0019527 | 1.81E-02 | 5.84E-02 | Sord,20322:up        |
| regulation of erythrocyte clearance                                                                                      | GO:0034106 | 1.81E-02 | 5.84E-02 | Cd24a,12484:down     |
| regulation of renal phosphate excretion                                                                                  | GO:1903402 | 1.81E-02 | 5.84E-02 | Stc1,20855:up        |
| L-cysteine catabolic process to pyruvate                                                                                 | GO:0019450 | 1.81E-02 | 5.84E-02 | Cdo1,12583:up        |
| specification of ureteric bud anterior/posterior symmetry by BMP signaling pathway                                       | GO:0072101 | 1.81E-02 | 5.84E-02 | Bmp4,12159:up        |
| induction by virus of host cell-cell fusion                                                                              | GO:0006948 | 1.81E-02 | 5.84E-02 | Cd4,12504:up         |
| pancreatic trypsinogen secretion                                                                                         | GO:190747  | 1.81E-02 | 5.84E-02 | Mmp13,17386:up       |
| pulmonary artery endothelial tube morphogenesis                                                                          | GO:0061155 | 1.81E-02 | 5.84E-02 | Bmp4,12159:up        |

|                                                                                       |            |          |          |                    |
|---------------------------------------------------------------------------------------|------------|----------|----------|--------------------|
| negative regulation of metanephric mesenchymal cell migration                         | GO:2000590 | 1.81E-02 | 5.84E-02 | Adipoq,11450:up    |
| iron cation export                                                                    | GO:1903414 | 1.81E-02 | 5.84E-02 | Slc40a1,53945:up   |
| enteric smooth muscle cell differentiation                                            | GO:0035645 | 1.81E-02 | 5.84E-02 | Ednrb,13618:up     |
| CMP salvage                                                                           | GO:0006238 | 1.81E-02 | 5.84E-02 | Uck2,80914:down    |
| renal phosphate excretion                                                             | GO:0044722 | 1.81E-02 | 5.84E-02 | Stc1,20855:up      |
| ossification involved in bone remodeling                                              | GO:0043932 | 1.81E-02 | 5.84E-02 | Cthrc1,68588:down  |
| negative regulation of oligodendrocyte apoptotic process                              | GO:1900142 | 1.81E-02 | 5.84E-02 | Gas6,14456:up      |
| sorbitol catabolic process                                                            | GO:0006062 | 1.81E-02 | 5.84E-02 | Sord,20322:up      |
| protein deamination                                                                   | GO:0018277 | 1.81E-02 | 5.84E-02 | Loxl2,94352:down   |
| negative regulation of erythrocyte aggregation                                        | GO:0034119 | 1.81E-02 | 5.84E-02 | Cd24a,12484:down   |
| lipopolysaccharide metabolic process                                                  | GO:0008653 | 1.81E-02 | 5.84E-02 | Aoah,27052:up      |
| negative regulation of retinoic acid biosynthetic process                             | GO:1900053 | 1.81E-02 | 5.84E-02 | Akr1c18,105349:up  |
| BMP signaling pathway involved in ureter morphogenesis                                | GO:0061149 | 1.81E-02 | 5.84E-02 | Bmp4,12159:up      |
| nucleus accumbens development                                                         | GO:0021768 | 1.81E-02 | 5.84E-02 | Aldh1a3,56847:down |
| L-cysteine catabolic process to pyruvate, using cysteine dioxygenase                  | GO:0019451 | 1.81E-02 | 5.84E-02 | Cdo1,12583:up      |
| coronal suture morphogenesis                                                          | GO:0060365 | 1.81E-02 | 5.84E-02 | Fgfr2,14183:up     |
| regulation of pancreatic trypsinogen secretion                                        | GO:1904242 | 1.81E-02 | 5.84E-02 | Mmp13,17386:up     |
| negative regulation of long-term synaptic potentiation                                | GO:1900272 | 1.81E-02 | 5.84E-02 | Cx3cr1,13051:down  |
| negative regulation of osteoclast proliferation                                       | GO:0090291 | 1.81E-02 | 5.84E-02 | Grem1,23892:up     |
| response to serotonin                                                                 | GO:1904014 | 1.81E-02 | 5.84E-02 | Htr2b,15559:down   |
| negative regulation of erythrocyte clearance                                          | GO:0034107 | 1.81E-02 | 5.84E-02 | Cd24a,12484:down   |
| specification of ureteric bud anterior/posterior symmetry                             | GO:0072100 | 1.81E-02 | 5.84E-02 | Bmp4,12159:up      |
| canonical wnt signaling pathway involved in positive regulation of cell-cell adhesion | GO:0044329 | 1.81E-02 | 5.84E-02 | Plpp3,67916:up     |
| positive regulation of mitotic cell cycle DNA replication                             | GO:1903465 | 1.81E-02 | 5.84E-02 | Fgfr1,14182:down   |
| regulation of metanephric comma-shaped body morphogenesis                             | GO:2000006 | 1.81E-02 | 5.84E-02 | Bmp4,12159:up      |
| positive regulation of trophectodermal cell proliferation                             | GO:1904075 | 1.81E-02 | 5.84E-02 | Igf1,16000:up      |
| polysaccharide localization                                                           | GO:0033037 | 1.81E-02 | 5.84E-02 | Chst11,58250:down  |
| positive regulation of renal albumin absorption                                       | GO:2000534 | 1.81E-02 | 5.84E-02 | Adipoq,11450:up    |
| stromal-epithelial cell signaling involved in prostate gland development              | GO:0044345 | 1.81E-02 | 5.84E-02 | Sfrp1,20377:up     |
| response to luteinizing hormone                                                       | GO:0034699 | 1.81E-02 | 5.84E-02 | Tgfb3,21814:up     |

|                                                                                                      |            |          |          |                   |
|------------------------------------------------------------------------------------------------------|------------|----------|----------|-------------------|
| negative regulation of metanephric S-shaped body morphogenesis                                       | GO:2000005 | 1.81E-02 | 5.84E-02 | Bmp4,12159:up     |
| ureter epithelial cell differentiation                                                               | GO:0072192 | 1.81E-02 | 5.84E-02 | Bmp4,12159:up     |
| positive regulation of pancreatic trypsinogen secretion                                              | GO:1904244 | 1.81E-02 | 5.84E-02 | Mmp13,17386:up    |
| metanephric comma-shaped body morphogenesis                                                          | GO:0072278 | 1.81E-02 | 5.84E-02 | Bmp4,12159:up     |
| cellular response to serotonin                                                                       | GO:1904015 | 1.81E-02 | 5.84E-02 | Htr2b,15559:down  |
| UMP salvage                                                                                          | GO:0044206 | 1.81E-02 | 5.84E-02 | Uck2,80914:down   |
| pyrimidine nucleotide salvage                                                                        | GO:0032262 | 1.81E-02 | 5.84E-02 | Uck2,80914:down   |
| intermediate mesoderm morphogenesis                                                                  | GO:0048390 | 1.81E-02 | 5.84E-02 | Bmp4,12159:up     |
| regulation of transcription from RNA polymerase II promoter involved in mesonephros development      | GO:0061216 | 1.81E-02 | 5.84E-02 | Bmp4,12159:up     |
| L-xylitol metabolic process                                                                          | GO:0051164 | 1.81E-02 | 5.84E-02 | Sord,20322:up     |
| mesoderm structural organization                                                                     | GO:0048338 | 1.81E-02 | 5.84E-02 | Bmpr1a,12166:down |
| C21-steroid hormone catabolic process                                                                | GO:0008208 | 1.81E-02 | 5.84E-02 | Akr1c18,105349:up |
| erythrocyte clearance                                                                                | GO:0034102 | 1.81E-02 | 5.84E-02 | Cd24a,12484:down  |
| chemokine receptor transport out of membrane raft                                                    | GO:0032600 | 1.81E-02 | 5.84E-02 | Cd24a,12484:down  |
| detection of oxidative stress                                                                        | GO:0070994 | 1.81E-02 | 5.84E-02 | Adipoq,11450:up   |
| uridine transport                                                                                    | GO:0015862 | 1.81E-02 | 5.84E-02 | Slc29a1,63959:up  |
| posterior midgut development                                                                         | GO:0007497 | 1.81E-02 | 5.84E-02 | Ednrb,13618:up    |
| insulin catabolic process                                                                            | GO:1901143 | 1.81E-02 | 5.84E-02 | Ceacam1,26365:up  |
| regulation of chemokine (C-C motif) ligand 2 secretion                                               | GO:1904207 | 1.81E-02 | 5.84E-02 | Postn,50706:down  |
| negative regulation of transforming growth factor beta3 production                                   | GO:0032913 | 1.81E-02 | 5.84E-02 | Cd24a,12484:down  |
| seminal vesicle epithelium development                                                               | GO:0061108 | 1.81E-02 | 5.84E-02 | Serpine2,20720:up |
| inorganic diphosphate transport                                                                      | GO:0030505 | 1.81E-02 | 5.84E-02 | Enpp1,18605:down  |
| negative regulation of branch elongation involved in ureteric bud branching by BMP signaling pathway | GO:0072097 | 1.81E-02 | 5.84E-02 | Bmp4,12159:up     |
| response to chromate                                                                                 | GO:0046687 | 1.81E-02 | 5.84E-02 | Mt1,17748:up      |
| cellular response to amine stimulus                                                                  | GO:0071418 | 1.81E-02 | 5.84E-02 | Htr2b,15559:down  |
| hyaloid vascular plexus regression                                                                   | GO:1990384 | 1.81E-02 | 5.84E-02 | Ninj1,18081:up    |
| hexitol catabolic process                                                                            | GO:0019407 | 1.81E-02 | 5.84E-02 | Sord,20322:up     |
| neural plate mediolateral regionalization                                                            | GO:0021998 | 1.81E-02 | 5.84E-02 | Bmpr1a,12166:down |
| negative regulation of branch elongation involved in ureteric bud branching                          | GO:0072096 | 1.81E-02 | 5.84E-02 | Bmp4,12159:up     |

|                                                                                      |            |          |          |                      |
|--------------------------------------------------------------------------------------|------------|----------|----------|----------------------|
| positive regulation of cell proliferation involved in outflow tract morphogenesis    | GO:1901964 | 1.81E-02 | 5.84E-02 | Bmp4,12159:up        |
| regulation of cardiac muscle fiber development                                       | GO:0055018 | 1.81E-02 | 5.84E-02 | Bmp4,12159:up        |
| negative regulation of pancreatic stellate cell proliferation                        | GO:2000230 | 1.81E-02 | 5.84E-02 | Pparg,19016:up       |
| protein transport out of membrane raft                                               | GO:0032599 | 1.81E-02 | 5.84E-02 | Cd24a,12484:down     |
| negative regulation of natural killer cell chemotaxis                                | GO:2000502 | 1.81E-02 | 5.84E-02 | Ccl12,20293:up       |
| BMP signaling pathway involved in renal system segmentation                          | GO:0061151 | 1.81E-02 | 5.84E-02 | Bmp4,12159:up        |
| pyrimidine ribonucleotide salvage                                                    | GO:0010138 | 1.81E-02 | 5.84E-02 | Uck2,80914:down      |
| negative regulation of cell proliferation involved in heart morphogenesis            | GO:2000137 | 1.81E-02 | 5.84E-02 | Bmp4,12159:up        |
| renal albumin absorption                                                             | GO:0097018 | 1.81E-02 | 5.84E-02 | Adipoq,11450:up      |
| progesterone catabolic process                                                       | GO:0006709 | 1.81E-02 | 5.84E-02 | Akr1c18,105349:up    |
| regulation of retinoic acid biosynthetic process                                     | GO:1900052 | 1.81E-02 | 5.84E-02 | Akr1c18,105349:up    |
| growth plate cartilage axis specification                                            | GO:0003421 | 1.81E-02 | 5.84E-02 | Stc1,20855:up        |
| negative regulation of dermatome development                                         | GO:0061185 | 1.81E-02 | 5.84E-02 | Sfrp2,20319:up       |
| negative regulation of isoprenoid metabolic process                                  | GO:0045827 | 1.81E-02 | 5.84E-02 | Akr1c18,105349:up    |
| regulation of metanephric S-shaped body morphogenesis                                | GO:2000004 | 1.81E-02 | 5.84E-02 | Bmp4,12159:up        |
| endothelin receptor signaling pathway                                                | GO:0086100 | 1.81E-02 | 5.84E-02 | Ednrb,13618:up       |
| negative regulation of cellular response to hepatocyte growth factor stimulus        | GO:2001113 | 1.81E-02 | 5.84E-02 | Adamts12,239337:down |
| anterior/posterior pattern specification involved in ureteric bud development        | GO:0072099 | 1.81E-02 | 5.84E-02 | Bmp4,12159:up        |
| microblast growth factor receptor signaling pathway involved in hematopoiesis        | GO:0035603 | 1.81E-02 | 5.84E-02 | Fgfr2,14183:up       |
| regulation of trophectodermal cell proliferation                                     | GO:1904073 | 1.81E-02 | 5.84E-02 | Igf1,16000:up        |
| positive regulation of protein kinase D signaling                                    | GO:1903572 | 1.81E-02 | 5.84E-02 | Vegfa,22339:down     |
| regulation of metanephric glomerular visceral epithelial cell development            | GO:2000477 | 1.81E-02 | 5.84E-02 | Adipoq,11450:up      |
| ferrous iron transmembrane transport                                                 | GO:1903874 | 1.81E-02 | 5.84E-02 | Slc40a1,53945:up     |
| positive regulation of cardiac muscle fiber development                              | GO:0055020 | 1.81E-02 | 5.84E-02 | Bmp4,12159:up        |
| negative regulation of mesenchymal cell proliferation involved in ureter development | GO:0072200 | 1.81E-02 | 5.84E-02 | Bmp4,12159:up        |
| ferrous iron export                                                                  | GO:1903988 | 1.81E-02 | 5.84E-02 | Slc40a1,53945:up     |

|                                                                                                                         |             |          |          |                                                                                                                              |
|-------------------------------------------------------------------------------------------------------------------------|-------------|----------|----------|------------------------------------------------------------------------------------------------------------------------------|
| negative regulation of renal phosphate excretion                                                                        | GO:1903403  | 1.81E-02 | 5.84E-02 | Stc1,20855:up                                                                                                                |
| negative regulation of T cell homeostatic proliferation                                                                 | GO:0046014  | 1.81E-02 | 5.84E-02 | Cd24a,12484:down                                                                                                             |
| mesenchymal-epithelial cell signaling involved in prostate gland development                                            | GO:0060739  | 1.81E-02 | 5.84E-02 | Tnc,21923:down                                                                                                               |
| fibroblast growth factor receptor signaling pathway involved in negative regulation of apoptotic process in bone marrow | GO:0035602  | 1.81E-02 | 5.84E-02 | Fgfr2,14183:up                                                                                                               |
| positive regulation of metanephric glomerular visceral epithelial cell development                                      | GO:2000478  | 1.81E-02 | 5.84E-02 | Adipoq,11450:up                                                                                                              |
| CMP biosynthetic process                                                                                                | GO:0009224  | 1.81E-02 | 5.84E-02 | Uck2,80914:down                                                                                                              |
| regulation of cellular response to hepatocyte growth factor stimulus                                                    | GO:2001112  | 1.81E-02 | 5.84E-02 | Adams12,239337:down                                                                                                          |
| macrophage differentiation                                                                                              | GO:0030225  | 1.81E-02 | 5.84E-02 | Vegfa,22339:down Bmp4,12159:up Adipoq,11450:up                                                                               |
| iron ion transport                                                                                                      | GO:0006826  | 1.81E-02 | 5.84E-02 | Trf,22041:up Tfrc,22042:up Slc40a1,53945:up                                                                                  |
| positive regulation of cell mediated immunity                                                                           | GO:0002714  | 1.81E-02 | 5.84E-02 | Tnf,21926:up C3,12266:up Tfrc,22042:up                                                                                       |
| fat-soluble vitamin metabolic process                                                                                   | GO:0006775  | 1.81E-02 | 5.84E-02 | Vdr,22337:down Tnf,21926:up Fgfr1,14182:down                                                                                 |
| positive regulation of immunoglobulin mediated immune response                                                          | GO:0002891  | 1.81E-02 | 5.84E-02 | Tnf,21926:up C3,12266:up Tfrc,22042:up                                                                                       |
| regulation of muscle system process                                                                                     | GO:00090257 | 1.83E-02 | 5.91E-02 | Fxyd1,56188:up Lmcd1,30937:up Wisp1,22402:down Ptgs2,19225:down Stc1,20855:up Igf1,16000:up Npnt,114249:up Errfi1,74155:down |
| regulation of lymphocyte proliferation                                                                                  | GO:00050670 | 1.83E-02 | 5.91E-02 | Cd24a,12484:down Cd4,12504:up Tfrc,22042:up Igf1,16000:up Bmp4,12159:up Ceacam1,26365:up Igf2,16002:up Tnfsf9,21950:up       |
| positive regulation of JUN kinase activity                                                                              | GO:00043507 | 1.84E-02 | 5.93E-02 | Tnf,21926:up Trf,22041:up Wnt5a,22418:down Il1rn,16181:up                                                                    |
| cellular carbohydrate biosynthetic process                                                                              | GO:00034637 | 1.84E-02 | 5.93E-02 | Has2,15117:down Enpp1,18605:down Igf2,16002:up Igf1,16000:up                                                                 |
| polysaccharide biosynthetic process                                                                                     | GO:0000271  | 1.84E-02 | 5.93E-02 | Has2,15117:down Enpp1,18605:down Igf2,16002:up Igf1,16000:up                                                                 |

|                                                                                           |            |          |          |                                                                                                                                                                                                                                                                                                                                                                                                                                                                                                                                                                                                                                                                                                                                                                                                                                                                                                                                                                                                                                                                                                                                                                                                                                                                                                                                                                                                                                                                                                                                                                                                                                                                                                                                                                                                                                                                                                                                                                                                                                                                                                                                                                                                                                                                                                                                                                                                                                                                                                                                                                                                                                                                                                                                                                                                                                                                                                                                                                                                                                                                                                                                                                                                                                                                                                                                                                                                                                                                                                                                                                                                                                                                                                                                                                                                                                                                                                 |
|-------------------------------------------------------------------------------------------|------------|----------|----------|-------------------------------------------------------------------------------------------------------------------------------------------------------------------------------------------------------------------------------------------------------------------------------------------------------------------------------------------------------------------------------------------------------------------------------------------------------------------------------------------------------------------------------------------------------------------------------------------------------------------------------------------------------------------------------------------------------------------------------------------------------------------------------------------------------------------------------------------------------------------------------------------------------------------------------------------------------------------------------------------------------------------------------------------------------------------------------------------------------------------------------------------------------------------------------------------------------------------------------------------------------------------------------------------------------------------------------------------------------------------------------------------------------------------------------------------------------------------------------------------------------------------------------------------------------------------------------------------------------------------------------------------------------------------------------------------------------------------------------------------------------------------------------------------------------------------------------------------------------------------------------------------------------------------------------------------------------------------------------------------------------------------------------------------------------------------------------------------------------------------------------------------------------------------------------------------------------------------------------------------------------------------------------------------------------------------------------------------------------------------------------------------------------------------------------------------------------------------------------------------------------------------------------------------------------------------------------------------------------------------------------------------------------------------------------------------------------------------------------------------------------------------------------------------------------------------------------------------------------------------------------------------------------------------------------------------------------------------------------------------------------------------------------------------------------------------------------------------------------------------------------------------------------------------------------------------------------------------------------------------------------------------------------------------------------------------------------------------------------------------------------------------------------------------------------------------------------------------------------------------------------------------------------------------------------------------------------------------------------------------------------------------------------------------------------------------------------------------------------------------------------------------------------------------------------------------------------------------------------------------------------------------------|
| cellular process                                                                          | GO:0009987 | 1.87E-02 | 6.02E-02 | Fstl3,65554:down Igf1,16010:up Adm1,11535:up Frlt2,399558:down Tmem176b,65963:up Pxn1,67784:up Tfec,21426:up Sfrp4,20379:up Ltp2,16997:down Serpinh1,12406:down Lyl1,17095:up Gstt1,14871:up Blvrb,233016:up Igf1,16000:up Bsp,15891:up Plk2,20620:down Cd24a,12484:down Mme,17380:up Fkbp14,231997:down Irn,16181:up Maob,109731:up Bmp4,12159:up Oas1,231655:up Hpse,15442:up Medag,70717:down Ptgir,19222:up Fgfr2,14183:up Thbs2,21826:down Htr2b,15559:down Dram1,17172:up Ccl6,20305:up Gjb5,14622:down Slpi,20568:up Aspn,66695:down Mt2,17750:up Cxcr6,80901:down Fam132b,227358:down Nabp1,109019:down Mmp2,17390:down Oas3,246727:up Slc40a1,53945:up Egfr,13649:down Alpl,11647:up Tfrc,22042:up Snyc,20618:up Ccl8,20307:up Gstm1,14862:up Serpina3g,20715:up Rspo2,239405:up Fam20a,208659:down Syt13,80976:up Mt1,17748:up Col5a2,12832:down Mrc1,17533:up Aldh1a2,19378:up Ccl2,20296:up Ednr,13618:up Ampd3,11717:up Mmp13,17386:up Htra3,78558:down Tnfrsf12a,27279:down Uchl5,56207:up Sord,20322:up Clec4e,56620:up Shroom4,208431:down Enpp3,209558:down Cdo1,12583:up Dok2,13449:up Mamdc2,71738:down Csrp2,13008:down Hvcn1,74096:up Ptx3,19288:up Ncam1,17967:down Ccl4,20303:up Chst11,58250:down Vegfb,22340:up Aldh1a3,56847:down Ppp3,67916:up Mrc2,17534:down Lrrc17,74511:down Lama2,16773:down Ccl9,20308:up Ptk7,71461:down Inhba,16323:down Bnc2,242509:down Tfpi2,21789:down Crif1,12931:down Plod2,26432:down Vegfa,22339:down Gfpt2,14584:down Serpine2,20720:up Cbr2,12409:up Nxn,18230:down Igf2,16002:up Kdelr3,105785:down Tmem176a,66058:up Tnf,21926:up Col1a2,12843:down Fxyd1,56188:up Fgfr1,14182:down Lpl,16956:up Sulf1,240725:down Susd2,71733:up Cd4,12504:up Col3a1,12825:down Tbx15,21384:down Serping1,12258:up Emb,13723:up Uck2,80914:down Enpp1,18605:down Clec2d,93694:up Hpgd,15446:up C3,12266:up Enpp5,83965:up Ankrd1,107765:down Cx3cr1,13051:down Cd109,235505:down Ggt5,23887:up Loxl2,94352:down Loxl3,16950:down Trf,22041:up Cxcl14,57266:down Ceacam10,26366:up Wnt5a,22418:down Stc1,20855:up Mark1,226778:up Col8a1,12837:down Adipoq,11450:up Hal,15109:up Igf1,16000:up Crabp2,12904:down Cxc9,17329:up Tgfb2,21808:down F3,14066:up Clec4e,56619:up Cttrc1,68588:down Kng1,16644:up Prl2c2,18811:up Efemp1,216616:up Dpysl3,22240:down Ninj1,18081:up Saa3,20210:up Vdr,22337:down Pdia5,72599:down Fabp4,11770:up Cxcl12,20315:up Htra2a,15558:down Slc16a4,229699:down Smoc2,64074:down Gas6,14456:up Col11a1,12814:down Sfrp1,20377:up C1qtnf3,81799:down Tgfb3,21814:up Fxyd2,11936:up Serinc2,230779:down Tfll1,21892:down Ceacam1,26365:up Sfrp2,20319:up Pxdn,69675:down Tnfrsf11b,18383:up Prkr2b,19088:up Npnt,114249:up S100a1,20193:up Ice1,218333:down Ly9,17085:up Neur3,214854:down Ccl7,20306:up Pdzn3,55983:down Pdgfc,54635:down Mgp,17313:up Figf,14205:up Cst7,13011:up Ifit3,15959:up Sema7a,20361:down Epas1,13819:up Slc29a1,63959:up Marc1,66112:up Gpm6b,14758:up Ddah1,69219:down Sdpr,20324:down Fkbp10,14230:down Postn,50706:down Npl,74091:up Man2a2,140481:up Akr1c18,105349:up Fabp5,16592:up Bmpr1a,12166:down Ccl12,20293:up Wisp1,22402:down Ank,11732:down Tnc,21923:down Gatm,67092:down Ret,19713:up Prg4,96875:down Sdf2l1,64136:up Pdxk,216134:up Ifit1,15957:up Creb3l1,26427:down Irl1,17082:down Kitl,17311:up Fam101b,76566:down P4ha1,18451:down Hp,15439:up Aoah,27052:up Ras11a,68895:up Plat,18791:down Ccl3,20302:up Ctla2a,13024:down Srp2,68792:down Prepl,116847:up Adams2,239337:down Lrrc15,74488:down Anep,16790:up Pparg,19016:up Glp1r,14652:down Lmcd1,30937:up Tnfrsf23,79201:down Has2,15117:down Hmox1,15368:up C1qtnf6,72709:down Pgs2,19225:down Kcnj15,16516:down Grem1,23892:up Pbf1d,219132:up Col5a1,12831:down Mcoln3,171166:up Errf1,74155:down Htr2b,15559:down Tgfb2,21808:down Htra2a,15558:down Pdgfc,54635:down Serpine2,20720:up Igf1,16000:up |
| phosphatidylinositol-mediated signaling                                                   | GO:0048015 | 1.88E-02 | 6.02E-02 |                                                                                                                                                                                                                                                                                                                                                                                                                                                                                                                                                                                                                                                                                                                                                                                                                                                                                                                                                                                                                                                                                                                                                                                                                                                                                                                                                                                                                                                                                                                                                                                                                                                                                                                                                                                                                                                                                                                                                                                                                                                                                                                                                                                                                                                                                                                                                                                                                                                                                                                                                                                                                                                                                                                                                                                                                                                                                                                                                                                                                                                                                                                                                                                                                                                                                                                                                                                                                                                                                                                                                                                                                                                                                                                                                                                                                                                                                                 |
| tumor necrosis factor superfamily cytokine production                                     | GO:0071706 | 1.88E-02 | 6.02E-02 | Gas6,14456:up Ccl2,20296:up Errf1,74155:down Ccl4,20303:up Ccl3,20302:up Adipoq,11450:up                                                                                                                                                                                                                                                                                                                                                                                                                                                                                                                                                                                                                                                                                                                                                                                                                                                                                                                                                                                                                                                                                                                                                                                                                                                                                                                                                                                                                                                                                                                                                                                                                                                                                                                                                                                                                                                                                                                                                                                                                                                                                                                                                                                                                                                                                                                                                                                                                                                                                                                                                                                                                                                                                                                                                                                                                                                                                                                                                                                                                                                                                                                                                                                                                                                                                                                                                                                                                                                                                                                                                                                                                                                                                                                                                                                                        |
| regulation of steroid metabolic process                                                   | GO:0019218 | 1.89E-02 | 6.02E-02 | Vdr,22337:down Tnf,21926:up Akr1c18,105349:up Igf2,16002:up Igf1,16000:up                                                                                                                                                                                                                                                                                                                                                                                                                                                                                                                                                                                                                                                                                                                                                                                                                                                                                                                                                                                                                                                                                                                                                                                                                                                                                                                                                                                                                                                                                                                                                                                                                                                                                                                                                                                                                                                                                                                                                                                                                                                                                                                                                                                                                                                                                                                                                                                                                                                                                                                                                                                                                                                                                                                                                                                                                                                                                                                                                                                                                                                                                                                                                                                                                                                                                                                                                                                                                                                                                                                                                                                                                                                                                                                                                                                                                       |
| negative regulation of platelet-derived growth factor receptor signaling pathway          | GO:0010642 | 1.91E-02 | 6.02E-02 | Ptgir,19222:up Adipoq,11450:up                                                                                                                                                                                                                                                                                                                                                                                                                                                                                                                                                                                                                                                                                                                                                                                                                                                                                                                                                                                                                                                                                                                                                                                                                                                                                                                                                                                                                                                                                                                                                                                                                                                                                                                                                                                                                                                                                                                                                                                                                                                                                                                                                                                                                                                                                                                                                                                                                                                                                                                                                                                                                                                                                                                                                                                                                                                                                                                                                                                                                                                                                                                                                                                                                                                                                                                                                                                                                                                                                                                                                                                                                                                                                                                                                                                                                                                                  |
| positive regulation of vascular permeability                                              | GO:0043117 | 1.91E-02 | 6.02E-02 | Vegfa,22339:down Ccl4,20303:up                                                                                                                                                                                                                                                                                                                                                                                                                                                                                                                                                                                                                                                                                                                                                                                                                                                                                                                                                                                                                                                                                                                                                                                                                                                                                                                                                                                                                                                                                                                                                                                                                                                                                                                                                                                                                                                                                                                                                                                                                                                                                                                                                                                                                                                                                                                                                                                                                                                                                                                                                                                                                                                                                                                                                                                                                                                                                                                                                                                                                                                                                                                                                                                                                                                                                                                                                                                                                                                                                                                                                                                                                                                                                                                                                                                                                                                                  |
| chemical homeostasis within a tissue                                                      | GO:0048875 | 1.91E-02 | 6.02E-02 | Vegfa,22339:down Epas1,13819:up                                                                                                                                                                                                                                                                                                                                                                                                                                                                                                                                                                                                                                                                                                                                                                                                                                                                                                                                                                                                                                                                                                                                                                                                                                                                                                                                                                                                                                                                                                                                                                                                                                                                                                                                                                                                                                                                                                                                                                                                                                                                                                                                                                                                                                                                                                                                                                                                                                                                                                                                                                                                                                                                                                                                                                                                                                                                                                                                                                                                                                                                                                                                                                                                                                                                                                                                                                                                                                                                                                                                                                                                                                                                                                                                                                                                                                                                 |
| positive regulation of non-canonical Wnt signaling pathway                                | GO:2000052 | 1.91E-02 | 6.02E-02 | Sfrp1,20377:up Wnt5a,22418:down                                                                                                                                                                                                                                                                                                                                                                                                                                                                                                                                                                                                                                                                                                                                                                                                                                                                                                                                                                                                                                                                                                                                                                                                                                                                                                                                                                                                                                                                                                                                                                                                                                                                                                                                                                                                                                                                                                                                                                                                                                                                                                                                                                                                                                                                                                                                                                                                                                                                                                                                                                                                                                                                                                                                                                                                                                                                                                                                                                                                                                                                                                                                                                                                                                                                                                                                                                                                                                                                                                                                                                                                                                                                                                                                                                                                                                                                 |
| lactate transport                                                                         | GO:0015727 | 1.91E-02 | 6.02E-02 | Emb,13723:up Slc16a4,229699:down                                                                                                                                                                                                                                                                                                                                                                                                                                                                                                                                                                                                                                                                                                                                                                                                                                                                                                                                                                                                                                                                                                                                                                                                                                                                                                                                                                                                                                                                                                                                                                                                                                                                                                                                                                                                                                                                                                                                                                                                                                                                                                                                                                                                                                                                                                                                                                                                                                                                                                                                                                                                                                                                                                                                                                                                                                                                                                                                                                                                                                                                                                                                                                                                                                                                                                                                                                                                                                                                                                                                                                                                                                                                                                                                                                                                                                                                |
| plasma membrane lactate transport                                                         | GO:0035879 | 1.91E-02 | 6.02E-02 | Emb,13723:up Slc16a4,229699:down                                                                                                                                                                                                                                                                                                                                                                                                                                                                                                                                                                                                                                                                                                                                                                                                                                                                                                                                                                                                                                                                                                                                                                                                                                                                                                                                                                                                                                                                                                                                                                                                                                                                                                                                                                                                                                                                                                                                                                                                                                                                                                                                                                                                                                                                                                                                                                                                                                                                                                                                                                                                                                                                                                                                                                                                                                                                                                                                                                                                                                                                                                                                                                                                                                                                                                                                                                                                                                                                                                                                                                                                                                                                                                                                                                                                                                                                |
| response to gonadotropin                                                                  | GO:0034698 | 1.91E-02 | 6.02E-02 | Inhba,16323:down Tgfb3,21814:up                                                                                                                                                                                                                                                                                                                                                                                                                                                                                                                                                                                                                                                                                                                                                                                                                                                                                                                                                                                                                                                                                                                                                                                                                                                                                                                                                                                                                                                                                                                                                                                                                                                                                                                                                                                                                                                                                                                                                                                                                                                                                                                                                                                                                                                                                                                                                                                                                                                                                                                                                                                                                                                                                                                                                                                                                                                                                                                                                                                                                                                                                                                                                                                                                                                                                                                                                                                                                                                                                                                                                                                                                                                                                                                                                                                                                                                                 |
| divalent inorganic anion homeostasis                                                      | GO:0072505 | 1.91E-02 | 6.02E-02 | Sfrp4,20379:up Enpp1,18605:down                                                                                                                                                                                                                                                                                                                                                                                                                                                                                                                                                                                                                                                                                                                                                                                                                                                                                                                                                                                                                                                                                                                                                                                                                                                                                                                                                                                                                                                                                                                                                                                                                                                                                                                                                                                                                                                                                                                                                                                                                                                                                                                                                                                                                                                                                                                                                                                                                                                                                                                                                                                                                                                                                                                                                                                                                                                                                                                                                                                                                                                                                                                                                                                                                                                                                                                                                                                                                                                                                                                                                                                                                                                                                                                                                                                                                                                                 |
| activation-induced cell death of T cells                                                  | GO:0006924 | 1.91E-02 | 6.02E-02 | Ceacam1,26365:up Tgfb2,21808:down                                                                                                                                                                                                                                                                                                                                                                                                                                                                                                                                                                                                                                                                                                                                                                                                                                                                                                                                                                                                                                                                                                                                                                                                                                                                                                                                                                                                                                                                                                                                                                                                                                                                                                                                                                                                                                                                                                                                                                                                                                                                                                                                                                                                                                                                                                                                                                                                                                                                                                                                                                                                                                                                                                                                                                                                                                                                                                                                                                                                                                                                                                                                                                                                                                                                                                                                                                                                                                                                                                                                                                                                                                                                                                                                                                                                                                                               |
| regulation of Wnt signaling pathway, planar cell polarity pathway                         | GO:2000095 | 1.91E-02 | 6.02E-02 | Sfrp2,20319:up Sfrp1,20377:up                                                                                                                                                                                                                                                                                                                                                                                                                                                                                                                                                                                                                                                                                                                                                                                                                                                                                                                                                                                                                                                                                                                                                                                                                                                                                                                                                                                                                                                                                                                                                                                                                                                                                                                                                                                                                                                                                                                                                                                                                                                                                                                                                                                                                                                                                                                                                                                                                                                                                                                                                                                                                                                                                                                                                                                                                                                                                                                                                                                                                                                                                                                                                                                                                                                                                                                                                                                                                                                                                                                                                                                                                                                                                                                                                                                                                                                                   |
| regulation of transcription from RNA polymerase II promoter involved in heart development | GO:1901213 | 1.91E-02 | 6.02E-02 | Grem1,23892:up Bmp4,12159:up                                                                                                                                                                                                                                                                                                                                                                                                                                                                                                                                                                                                                                                                                                                                                                                                                                                                                                                                                                                                                                                                                                                                                                                                                                                                                                                                                                                                                                                                                                                                                                                                                                                                                                                                                                                                                                                                                                                                                                                                                                                                                                                                                                                                                                                                                                                                                                                                                                                                                                                                                                                                                                                                                                                                                                                                                                                                                                                                                                                                                                                                                                                                                                                                                                                                                                                                                                                                                                                                                                                                                                                                                                                                                                                                                                                                                                                                    |
| regulation of phospholipid biosynthetic process                                           | GO:0071071 | 1.91E-02 | 6.02E-02 | Htr2b,15559:down Htra2a,15558:down                                                                                                                                                                                                                                                                                                                                                                                                                                                                                                                                                                                                                                                                                                                                                                                                                                                                                                                                                                                                                                                                                                                                                                                                                                                                                                                                                                                                                                                                                                                                                                                                                                                                                                                                                                                                                                                                                                                                                                                                                                                                                                                                                                                                                                                                                                                                                                                                                                                                                                                                                                                                                                                                                                                                                                                                                                                                                                                                                                                                                                                                                                                                                                                                                                                                                                                                                                                                                                                                                                                                                                                                                                                                                                                                                                                                                                                              |
| positive regulation of monocyte chemotaxis                                                | GO:0090026 | 1.91E-02 | 6.02E-02 | Cxcl12,20315:up Ccl2,20296:up                                                                                                                                                                                                                                                                                                                                                                                                                                                                                                                                                                                                                                                                                                                                                                                                                                                                                                                                                                                                                                                                                                                                                                                                                                                                                                                                                                                                                                                                                                                                                                                                                                                                                                                                                                                                                                                                                                                                                                                                                                                                                                                                                                                                                                                                                                                                                                                                                                                                                                                                                                                                                                                                                                                                                                                                                                                                                                                                                                                                                                                                                                                                                                                                                                                                                                                                                                                                                                                                                                                                                                                                                                                                                                                                                                                                                                                                   |

|                                                                                      |            |          |          |                                                                                                                                                |
|--------------------------------------------------------------------------------------|------------|----------|----------|------------------------------------------------------------------------------------------------------------------------------------------------|
| positive regulation of glomerulus development                                        | GO:0090193 | 1.91E-02 | 6.02E-02 | Ret,19713:up Adipoq,11450:up                                                                                                                   |
| epithelial cell proliferation involved in lung morphogenesis                         | GO:0060502 | 1.91E-02 | 6.02E-02 | Fgfr2,14183:up Bmp4,12159:up                                                                                                                   |
| regulation of neuron maturation                                                      | GO:0014041 | 1.91E-02 | 6.02E-02 | Ret,19713:up Ednrb,13618:up                                                                                                                    |
| cholesterol storage                                                                  | GO:0010878 | 1.91E-02 | 6.02E-02 | Pparg,19016:up Lpl,16956:up                                                                                                                    |
| positive regulation of vascular endothelial growth factor receptor signaling pathway | GO:0030949 | 1.91E-02 | 6.02E-02 | Vegfa,22339:down Bmp4,12159:up                                                                                                                 |
| cytokine secretion involved in immune response                                       | GO:0002374 | 1.91E-02 | 6.02E-02 | Tnf,21926:up Wnt5a,22418:down                                                                                                                  |
| negative regulation of keratinocyte proliferation                                    | GO:0010839 | 1.91E-02 | 6.02E-02 | Vdr,22337:down Cd109,235505:down                                                                                                               |
| cartilage morphogenesis                                                              | GO:0060536 | 1.91E-02 | 6.02E-02 | Rspo2,239405:up Stc1,20855:up                                                                                                                  |
| fat-soluble vitamin biosynthetic process                                             | GO:0042362 | 1.91E-02 | 6.02E-02 | Vdr,22337:down Tnf,21926:up                                                                                                                    |
| striatum development                                                                 | GO:0021756 | 1.91E-02 | 6.02E-02 | Inhba,16323:down Aldh1a3,56847:down                                                                                                            |
| lactate transmembrane transport                                                      | GO:0035873 | 1.91E-02 | 6.02E-02 | Emb,13723:up Slc16a4,229699:down                                                                                                               |
| mucosal-associated lymphoid tissue development                                       | GO:0048537 | 1.91E-02 | 6.02E-02 | Ceacam1,26365:up Ret,19713:up                                                                                                                  |
| regulation of protein activation cascade                                             | GO:2000257 | 1.91E-02 | 6.02E-02 | Serping1,12258:up C3,12266:up                                                                                                                  |
| negative regulation of leukocyte chemotaxis                                          | GO:0002689 | 1.91E-02 | 6.02E-02 | Ccl12,20293:up Grem1,23892:up                                                                                                                  |
| trachea morphogenesis                                                                | GO:0060439 | 1.91E-02 | 6.02E-02 | Rspo2,239405:up Bmp4,12159:up                                                                                                                  |
| low-density lipoprotein receptor particle metabolic process                          | GO:0032799 | 1.91E-02 | 6.02E-02 | Pparg,19016:up Adipoq,11450:up                                                                                                                 |
| positive regulation of metanephros development                                       | GO:0072216 | 1.91E-02 | 6.02E-02 | Ret,19713:up Adipoq,11450:up                                                                                                                   |
| modulation by symbiont of host cellular process                                      | GO:0044068 | 1.91E-02 | 6.02E-02 | Ceacam1,26365:up Cd4,12504:up                                                                                                                  |
| neuroblast division                                                                  | GO:0055057 | 1.91E-02 | 6.02E-02 | Fgfr1,14182:down Fgfr2,14183:up                                                                                                                |
| neuronal stem cell division                                                          | GO:0036445 | 1.91E-02 | 6.02E-02 | Fgfr1,14182:down Fgfr2,14183:up                                                                                                                |
| chemokine metabolic process                                                          | GO:0050755 | 1.91E-02 | 6.02E-02 | Tnf,21926:up Wnt5a,22418:down                                                                                                                  |
| paraxial mesoderm morphogenesis                                                      | GO:0048340 | 1.91E-02 | 6.02E-02 | Wnt5a,22418:down Bmpr1a,12166:down                                                                                                             |
| muscle contraction                                                                   | GO:0006936 | 1.93E-02 | 6.08E-02 | Htr2b,15559:down Fxyd1,56188:up Sulf1,240725:down Ptgs2,19225:down Stc1,20855:up Ednrb,13618:up Vegfb,22340:up Htr2a,15558:down Npnt,114249:up |
| sex differentiation                                                                  | GO:0007548 | 1.93E-02 | 6.08E-02 | Sfrp1,20377:up Wnt5a,22418:down Inhba,16323:down Bmpr1a,12166:down Bmp4,12159:up Sfrp2,20319:up Vegfa,22339:down Mmp2,17390:down Kitl,17311:up |
| regulation of mononuclear cell proliferation                                         | GO:0032944 | 1.94E-02 | 6.11E-02 | Cd24a,12484:down Cd4,12504:up Tfrc,22042:up Igf1,16000:up Bmp4,12159:up Ceacam1,26365:up Igf2,16002:up Tnfsf9,21950:up                         |
| positive regulation of nuclear division                                              | GO:0051785 | 1.95E-02 | 6.14E-02 | Tnf,21926:up Wnt5a,22418:down Igf2,16002:up Igf1,16000:up                                                                                      |
| dendritic cell differentiation                                                       | GO:0097028 | 1.97E-02 | 6.18E-02 | Tmem176a,66058:up Tmem176b,65963:up Tnfsf9,21950:up                                                                                            |
| regulation of natural killer cell mediated cytotoxicity                              | GO:0042269 | 1.97E-02 | 6.18E-02 | Ceacam1,26365:up Clec2d,93694:up Igf2,16002:up                                                                                                 |
| apoptotic process involved in development                                            | GO:1902742 | 1.97E-02 | 6.18E-02 | Vdr,22337:down Tgfb2,21808:down Tgfb3,21814:up                                                                                                 |
| cellular response to estrogen stimulus                                               | GO:0071391 | 1.97E-02 | 6.18E-02 | Egfr,13649:down Sfrp1,20377:up Mmp2,17390:down                                                                                                 |
| positive regulation of steroid metabolic process                                     | GO:0045940 | 1.97E-02 | 6.18E-02 | Tnf,21926:up Igf2,16002:up Igf1,16000:up                                                                                                       |
| regulation of interferon-gamma production                                            | GO:0032649 | 1.98E-02 | 6.21E-02 | Tnf,21926:up Gas6,14456:up Wnt5a,22418:down Il1r1,17082:down Tnfsf9,21950:up                                                                   |

|                                                        |            |          |          |                                                                                                                                                                                                                                                                                                                                                                                                                                                                                                                                   |
|--------------------------------------------------------|------------|----------|----------|-----------------------------------------------------------------------------------------------------------------------------------------------------------------------------------------------------------------------------------------------------------------------------------------------------------------------------------------------------------------------------------------------------------------------------------------------------------------------------------------------------------------------------------|
| inositol lipid-mediated signaling                      | GO:0048017 | 2.03E-02 | 6.35E-02 | Htr2b,15559:down Tgfb2,21808:down Htr2a,15558:down Pdgfc,54635:down Serpine2,20720:up lgf1,16000:up                                                                                                                                                                                                                                                                                                                                                                                                                               |
| single-organism catabolic process                      | GO:0044712 | 2.05E-02 | 6.44E-02 | Hp,15439:up Sfrp4,20379:up Mmp13,17386:up Enpp5,83965:up Sord,20322:up Ddah1,69219:down Plod2,26432:down Htr2a,15558:down Mmp2,17390:down Blvrb,233016:up Npl,74091:up Enpp3,209558:down Cdo1,12583:up Tnf,21926:up Akr1c18,105349:up Lmcd1,30937:up Hmox1,15368:up Lpl,16956:up Adipoq,11450:up Hal,15109:up lgf1,16000:up Pxdn,69675:down Hpse,15442:up Sdf211,64136:up Enpp1,18605:down Mrc2,17534:down                                                                                                                        |
| oxidation-reduction process                            | GO:0055114 | 2.06E-02 | 6.45E-02 | P4ha1,18451:down Hpgd,15446:up Aldh1a2,19378:up Marc1,66112:up Sord,20322:up Plod2,26432:down Steap1,70358:down Blvrb,233016:up Cbr2,12409:up Nxn,18230:down lgf2,16002:up Cdo1,12583:up Pparg,19016:up Loxl2,94352:down Akr1c18,105349:up Loxl3,16950:down Hmox1,15368:up Ptgs2,19225:down Adipoq,11450:up lgf1,16000:up Maob,109731:up Pxdn,69675:down Aldh1a3,56847:down Enpp1,18605:down                                                                                                                                      |
| branching involved in ureteric bud morphogenesis       | GO:0016158 | 2.07E-02 | 6.47E-02 | Vegfa,22339:down Npnt,114249:up Grem1,23892:up Bmp4,12159:up                                                                                                                                                                                                                                                                                                                                                                                                                                                                      |
| regulation of protein processing                       | GO:0070613 | 2.07E-02 | 6.47E-02 | Ctla2a,13024:down Serping1,12258:up C3,12266:up Serpine2,20720:up                                                                                                                                                                                                                                                                                                                                                                                                                                                                 |
| sensory perception of mechanical stimulus              | GO:0050954 | 2.13E-02 | 6.65E-02 | Tnf,21926:up Fgfr1,14182:down Col11a1,12814:down Mcoln3,171166:up Htr2a,15558:down Serpine2,20720:up lgf1,16000:up                                                                                                                                                                                                                                                                                                                                                                                                                |
| positive regulation of bone mineralization             | GO:0030501 | 2.14E-02 | 6.65E-02 | Gpm6b,14758:up Bmpr1a,12166:down Bmp4,12159:up                                                                                                                                                                                                                                                                                                                                                                                                                                                                                    |
| positive regulation of BMP signaling pathway           | GO:0030513 | 2.14E-02 | 6.65E-02 | Sulf1,240725:down Tgfb3,21814:up Bmp4,12159:up                                                                                                                                                                                                                                                                                                                                                                                                                                                                                    |
| positive regulation of myotube differentiation         | GO:0010831 | 2.14E-02 | 6.65E-02 | Ccl8,20307:up Cxcl9,17329:up Cxcl12,20315:up                                                                                                                                                                                                                                                                                                                                                                                                                                                                                      |
| heart valve morphogenesis                              | GO:0003179 | 2.14E-02 | 6.65E-02 | Tgfb2,21808:down Bmpr1a,12166:down Bmp4,12159:up                                                                                                                                                                                                                                                                                                                                                                                                                                                                                  |
| regulation of natural killer cell mediated immunity    | GO:0002715 | 2.14E-02 | 6.65E-02 | Ceacam1,26365:up Clec2d,93694:up lgf2,16002:up                                                                                                                                                                                                                                                                                                                                                                                                                                                                                    |
| positive regulation of Ras protein signal transduction | GO:0046579 | 2.14E-02 | 6.65E-02 | Col3a1,12825:down Kitl,17311:up lgf1,16000:up                                                                                                                                                                                                                                                                                                                                                                                                                                                                                     |
| endoderm formation                                     | GO:0001706 | 2.14E-02 | 6.65E-02 | Col5a2,12832:down Col5a1,12831:down Inhba,16323:down                                                                                                                                                                                                                                                                                                                                                                                                                                                                              |
| insulin-like growth factor receptor signaling pathway  | GO:0048009 | 2.14E-02 | 6.65E-02 | Igfbp4,16010:up Igfbp3,16009:up lgf1,16000:up                                                                                                                                                                                                                                                                                                                                                                                                                                                                                     |
| olfactory lobe development                             | GO:0021988 | 2.14E-02 | 6.65E-02 | Fgfr1,14182:down Wnt5a,22418:down Sema7a,20361:down                                                                                                                                                                                                                                                                                                                                                                                                                                                                               |
| cell projection organization                           | GO:0030030 | 2.15E-02 | 6.67E-02 | Cthrc1,68588:down Prl2c2,18811:up Adm,11535:up Flrt2,399558:down Lama2,16773:down Efemp1,216616:up Plxnd1,67784:up Ptk7,71461:down Dpysl3,22240:down Sema7a,20361:down Ankrd1,107765:down Tnfrsf12a,27279:down Cxcl12,20315:up Postn,50706:down Vegfa,22339:down Mmp2,17390:down Serpin e2,20720:up Plk2,20620:down Cd24a,12484:down Egfr,13649:down Fgfr1,14182:down Ncam1,17967:down Sfrp1,20377:up Wnt5a,22418:down Bmp4,12159:up Sfrp2,20319:up Crabp2,12904:down Tnc,21923:down Ret,19713:up Tgfb2,21808:down Fgfr2,14183:up |
| nucleoside phosphate catabolic process                 | GO:1901292 | 2.16E-02 | 6.72E-02 | Htr2a,15558:down Enpp1,18605:down Enpp3,209558:down Enpp5,83965:up lgf1,16000:up                                                                                                                                                                                                                                                                                                                                                                                                                                                  |
| small GTPase mediated signal transduction              | GO:0007264 | 2.18E-02 | 6.76E-02 | Ccl9,20308:up Ccl6,20305:up Rasl11a,68895:up Ccl7,20306:up Ccl2,20296:up Ccl3,20302:up Dok2,13449:up Col1a2,12843:down Plk2,20620:down Hmox1,15368:up Wnt5a,22418:down Ccl12,20293:up Ccl4,20303:up lgf1,16000:up Col3a1,12825:down Ccl8,20307:up Tgfb2,21808:down Kitl,17311:up                                                                                                                                                                                                                                                  |
| regulation of protein maturation                       | GO:1903317 | 2.19E-02 | 6.78E-02 | Ctla2a,13024:down Serping1,12258:up C3,12266:up Serpine2,20720:up                                                                                                                                                                                                                                                                                                                                                                                                                                                                 |
| regulation of organic acid transport                   | GO:0032890 | 2.19E-02 | 6.78E-02 | Tnf,21926:up Fxyd1,56188:up Fam132b,227358:down Il1rn,16181:up                                                                                                                                                                                                                                                                                                                                                                                                                                                                    |
| establishment of apical/basal cell polarity            | GO:0035089 | 2.23E-02 | 6.83E-02 | Ptk7,71461:down Wnt5a,22418:down                                                                                                                                                                                                                                                                                                                                                                                                                                                                                                  |
| ventricular trabecula myocardium morphogenesis         | GO:0003222 | 2.23E-02 | 6.83E-02 | Tgfb2,21808:down Bmpr1a,12166:down                                                                                                                                                                                                                                                                                                                                                                                                                                                                                                |
| craniofacial suture morphogenesis                      | GO:0097094 | 2.23E-02 | 6.83E-02 | Fgfr2,14183:up Bmp4,12159:up                                                                                                                                                                                                                                                                                                                                                                                                                                                                                                      |
| branching involved in labyrinthine layer morphogenesis | GO:0060670 | 2.23E-02 | 6.83E-02 | Adm,11535:up Fgfr2,14183:up                                                                                                                                                                                                                                                                                                                                                                                                                                                                                                       |
| iron ion import                                        | GO:0097286 | 2.23E-02 | 6.83E-02 | Trf,22041:up Tfrc,22042:up                                                                                                                                                                                                                                                                                                                                                                                                                                                                                                        |
| positive regulation of osteoblast proliferation        | GO:0033690 | 2.23E-02 | 6.83E-02 | Cthrc1,68588:down Hpse,15442:up                                                                                                                                                                                                                                                                                                                                                                                                                                                                                                   |
| glomerular visceral epithelial cell differentiation    | GO:0072112 | 2.23E-02 | 6.83E-02 | Bmp4,12159:up Adipoq,11450:up                                                                                                                                                                                                                                                                                                                                                                                                                                                                                                     |
| renal filtration cell differentiation                  | GO:0061318 | 2.23E-02 | 6.83E-02 | Bmp4,12159:up Adipoq,11450:up                                                                                                                                                                                                                                                                                                                                                                                                                                                                                                     |
| dopamine biosynthetic process                          | GO:0042416 | 2.23E-02 | 6.83E-02 | Tgfb2,21808:down Epas1,13819:up                                                                                                                                                                                                                                                                                                                                                                                                                                                                                                   |



|                                                            |            |          |          |                                                                                                                                                                                                                                                                                                                                                                                                                                                                                                                                                                                                                                                                                                                                                                                                                                                                                                                                                                                                                                                                                                                                                                                                                                                                                                                                                                                                                                                                                                                                                                                                                                                                                                                                                                                                                                                                                                                                                                                                                                                                                                                                                                                                                                                                                                                                                       |
|------------------------------------------------------------|------------|----------|----------|-------------------------------------------------------------------------------------------------------------------------------------------------------------------------------------------------------------------------------------------------------------------------------------------------------------------------------------------------------------------------------------------------------------------------------------------------------------------------------------------------------------------------------------------------------------------------------------------------------------------------------------------------------------------------------------------------------------------------------------------------------------------------------------------------------------------------------------------------------------------------------------------------------------------------------------------------------------------------------------------------------------------------------------------------------------------------------------------------------------------------------------------------------------------------------------------------------------------------------------------------------------------------------------------------------------------------------------------------------------------------------------------------------------------------------------------------------------------------------------------------------------------------------------------------------------------------------------------------------------------------------------------------------------------------------------------------------------------------------------------------------------------------------------------------------------------------------------------------------------------------------------------------------------------------------------------------------------------------------------------------------------------------------------------------------------------------------------------------------------------------------------------------------------------------------------------------------------------------------------------------------------------------------------------------------------------------------------------------------|
| regulation of SMAD protein import into nucleus             | GO:0060390 | 2.23E-02 | 6.83E-02 | Bmpr1a,12166:down Bmp4,12159:up                                                                                                                                                                                                                                                                                                                                                                                                                                                                                                                                                                                                                                                                                                                                                                                                                                                                                                                                                                                                                                                                                                                                                                                                                                                                                                                                                                                                                                                                                                                                                                                                                                                                                                                                                                                                                                                                                                                                                                                                                                                                                                                                                                                                                                                                                                                       |
| eyelid development in camera-type eye                      | GO:0061029 | 2.23E-02 | 6.83E-02 | Egfr,13649:down Inhba,16323:down                                                                                                                                                                                                                                                                                                                                                                                                                                                                                                                                                                                                                                                                                                                                                                                                                                                                                                                                                                                                                                                                                                                                                                                                                                                                                                                                                                                                                                                                                                                                                                                                                                                                                                                                                                                                                                                                                                                                                                                                                                                                                                                                                                                                                                                                                                                      |
| glial cell apoptotic process                               | GO:0034349 | 2.23E-02 | 6.83E-02 | Gas6,14456:up Ccl12,20293:up                                                                                                                                                                                                                                                                                                                                                                                                                                                                                                                                                                                                                                                                                                                                                                                                                                                                                                                                                                                                                                                                                                                                                                                                                                                                                                                                                                                                                                                                                                                                                                                                                                                                                                                                                                                                                                                                                                                                                                                                                                                                                                                                                                                                                                                                                                                          |
| glomerular epithelial cell differentiation                 | GO:0072311 | 2.23E-02 | 6.83E-02 | Bmp4,12159:up Adipoq,11450:up                                                                                                                                                                                                                                                                                                                                                                                                                                                                                                                                                                                                                                                                                                                                                                                                                                                                                                                                                                                                                                                                                                                                                                                                                                                                                                                                                                                                                                                                                                                                                                                                                                                                                                                                                                                                                                                                                                                                                                                                                                                                                                                                                                                                                                                                                                                         |
| enteric nervous system development                         | GO:0048484 | 2.23E-02 | 6.83E-02 | Ret,19713:up Ednrb,13618:up                                                                                                                                                                                                                                                                                                                                                                                                                                                                                                                                                                                                                                                                                                                                                                                                                                                                                                                                                                                                                                                                                                                                                                                                                                                                                                                                                                                                                                                                                                                                                                                                                                                                                                                                                                                                                                                                                                                                                                                                                                                                                                                                                                                                                                                                                                                           |
| negative regulation of androgen receptor signaling pathway | GO:0060766 | 2.23E-02 | 6.83E-02 | Sfrp1,20377:up Igf1,16000:up                                                                                                                                                                                                                                                                                                                                                                                                                                                                                                                                                                                                                                                                                                                                                                                                                                                                                                                                                                                                                                                                                                                                                                                                                                                                                                                                                                                                                                                                                                                                                                                                                                                                                                                                                                                                                                                                                                                                                                                                                                                                                                                                                                                                                                                                                                                          |
| metanephric glomerulus development                         | GO:0072224 | 2.23E-02 | 6.83E-02 | Ret,19713:up Adipoq,11450:up                                                                                                                                                                                                                                                                                                                                                                                                                                                                                                                                                                                                                                                                                                                                                                                                                                                                                                                                                                                                                                                                                                                                                                                                                                                                                                                                                                                                                                                                                                                                                                                                                                                                                                                                                                                                                                                                                                                                                                                                                                                                                                                                                                                                                                                                                                                          |
| prostate gland growth                                      | GO:0060736 | 2.23E-02 | 6.83E-02 | Fgfr2,14183:up Igf1,16000:up                                                                                                                                                                                                                                                                                                                                                                                                                                                                                                                                                                                                                                                                                                                                                                                                                                                                                                                                                                                                                                                                                                                                                                                                                                                                                                                                                                                                                                                                                                                                                                                                                                                                                                                                                                                                                                                                                                                                                                                                                                                                                                                                                                                                                                                                                                                          |
| G-protein coupled receptor internalization                 | GO:0020231 | 2.23E-02 | 6.83E-02 | Htr2b,15559:down Adm,11535:up                                                                                                                                                                                                                                                                                                                                                                                                                                                                                                                                                                                                                                                                                                                                                                                                                                                                                                                                                                                                                                                                                                                                                                                                                                                                                                                                                                                                                                                                                                                                                                                                                                                                                                                                                                                                                                                                                                                                                                                                                                                                                                                                                                                                                                                                                                                         |
| regulation of cytoplasmic transport                        | GO:1903649 | 2.23E-02 | 6.84E-02 | Tnf,21926:up Gas6,14456:up Egfr,13649:down C1qtnf3,81799:down Bmpr1a,12166:down Cd4,12504:up Ptgs2,19225:down Grem1,23892:up Igf1,16000:up Bmp4,12159:up Ceacam1,26365:up Sfrp2,20319:up Tgfb2,21808:down                                                                                                                                                                                                                                                                                                                                                                                                                                                                                                                                                                                                                                                                                                                                                                                                                                                                                                                                                                                                                                                                                                                                                                                                                                                                                                                                                                                                                                                                                                                                                                                                                                                                                                                                                                                                                                                                                                                                                                                                                                                                                                                                             |
| response to alkaloid                                       | GO:0043279 | 2.26E-02 | 6.91E-02 | Tnf,21926:up Ncam1,17967:down Hmox1,15368:up Htr2a,15558:down Igf2,16002:up                                                                                                                                                                                                                                                                                                                                                                                                                                                                                                                                                                                                                                                                                                                                                                                                                                                                                                                                                                                                                                                                                                                                                                                                                                                                                                                                                                                                                                                                                                                                                                                                                                                                                                                                                                                                                                                                                                                                                                                                                                                                                                                                                                                                                                                                           |
| polysaccharide metabolic process                           | GO:0005976 | 2.26E-02 | 6.91E-02 | Has2,15117:down Aoah,27052:up Enpp1,18605:down Igf2,16002:up Igf1,16000:up                                                                                                                                                                                                                                                                                                                                                                                                                                                                                                                                                                                                                                                                                                                                                                                                                                                                                                                                                                                                                                                                                                                                                                                                                                                                                                                                                                                                                                                                                                                                                                                                                                                                                                                                                                                                                                                                                                                                                                                                                                                                                                                                                                                                                                                                            |
| cardiac muscle cell development                            | GO:0055013 | 2.31E-02 | 7.06E-02 | Vegfa,22339:down Wisp1,22402:down Igf1,16000:up Bmp4,12159:up                                                                                                                                                                                                                                                                                                                                                                                                                                                                                                                                                                                                                                                                                                                                                                                                                                                                                                                                                                                                                                                                                                                                                                                                                                                                                                                                                                                                                                                                                                                                                                                                                                                                                                                                                                                                                                                                                                                                                                                                                                                                                                                                                                                                                                                                                         |
| SMAD protein signal transduction                           | GO:0060395 | 2.31E-02 | 7.06E-02 | Trf,22041:up Tgfb2,21808:down Inhba,16323:down Bmp4,12159:up                                                                                                                                                                                                                                                                                                                                                                                                                                                                                                                                                                                                                                                                                                                                                                                                                                                                                                                                                                                                                                                                                                                                                                                                                                                                                                                                                                                                                                                                                                                                                                                                                                                                                                                                                                                                                                                                                                                                                                                                                                                                                                                                                                                                                                                                                          |
| negative regulation of MAP kinase activity                 | GO:0043407 | 2.31E-02 | 7.06E-02 | Sfrp2,20319:up Sfrp1,20377:up Bmp4,12159:up Adipoq,11450:up                                                                                                                                                                                                                                                                                                                                                                                                                                                                                                                                                                                                                                                                                                                                                                                                                                                                                                                                                                                                                                                                                                                                                                                                                                                                                                                                                                                                                                                                                                                                                                                                                                                                                                                                                                                                                                                                                                                                                                                                                                                                                                                                                                                                                                                                                           |
| inner ear receptor cell differentiation                    | GO:0060113 | 2.31E-02 | 7.06E-02 | Cthrc1,68588:down Fgfr1,14182:down Mcoln3,171166:up Bmp4,12159:up                                                                                                                                                                                                                                                                                                                                                                                                                                                                                                                                                                                                                                                                                                                                                                                                                                                                                                                                                                                                                                                                                                                                                                                                                                                                                                                                                                                                                                                                                                                                                                                                                                                                                                                                                                                                                                                                                                                                                                                                                                                                                                                                                                                                                                                                                     |
| embryonic forelimb morphogenesis                           | GO:0035115 | 2.31E-02 | 7.06E-02 | Crabp2,12904:down Rspo2,239405:up Aldh1a2,19378:up                                                                                                                                                                                                                                                                                                                                                                                                                                                                                                                                                                                                                                                                                                                                                                                                                                                                                                                                                                                                                                                                                                                                                                                                                                                                                                                                                                                                                                                                                                                                                                                                                                                                                                                                                                                                                                                                                                                                                                                                                                                                                                                                                                                                                                                                                                    |
| specification of organ identity                            | GO:0010092 | 2.31E-02 | 7.06E-02 | Fgfr1,14182:down Fgfr2,14183:up Bmp4,12159:up                                                                                                                                                                                                                                                                                                                                                                                                                                                                                                                                                                                                                                                                                                                                                                                                                                                                                                                                                                                                                                                                                                                                                                                                                                                                                                                                                                                                                                                                                                                                                                                                                                                                                                                                                                                                                                                                                                                                                                                                                                                                                                                                                                                                                                                                                                         |
| macromolecule metabolic process                            | GO:0043170 | 2.34E-02 | 7.14E-02 | Fstl3,83554:down Igf1,16000:up Adm,11535:up Flrt2,399558:down Tfrc,21426:up Sfrp4,20379:up Serp1,12406:down Lyl1,17095:up Gstt1,14871:up Igf1,16000:up Plk2,20620:down Cd24a,12484:down Mme,17380:up Fkbp14,231997:down Iir1,16181:up Bmp4,12159:up Hps1,15442:up Fgfr2,14183:up Htr2b,15559:down Ccl6,20305:up Slpi,20568:up Aspn,66695:down Nabp1,109019:down Mmp2,17390:down Oas3,246727:up Pappa,18491:down Slc40a1,53945:up Egfr,13649:down C1rb,667277:up Tfrc,22042:up Ccl8,20307:up Serpina3g,20715:up Fam20a,208659:down Aldh1a2,19378:up Ccl2,20296:up Ednrb,13618:up Mmp13,17386:up Htra3,78558:down Uchl5,56207:up Dok2,13449:up Mamdc2,71738:down Ptx3,19288:up Ccl4,20303:up Chst11,58250:down Vegfb,22340:up Plpp3,67916:up Mrc2,17534:down Ccl9,20308:up Inhba,16323:down Bnc2,242509:down Tfpi2,21789:down Crif1,12931:down C1s1,50908:up Vegfa,22339:down Serpine2,20720:up Nxn,18230:down Igf2,16002:up Tnf,21926:up Fgfr1,14182:down Sulf1,240725:down Cd4,12504:up Col3a1,12825:down Tbx15,21384:down Serping1,12258:up Enpp1,18605:down C3,12266:up Ankrd1,107765:down Cd109,235505:down Ggt5,23887:up Loxl2,94352:down Trf,22041:up Loxl3,16950:down Adam12,11489:down Wnt5a,22418:down Mark1,226778:up Adipoq,11450:up Igf1,16000:up Tgfb2,21808:down F3,14066:up Adamts4,240913:down Pri2c2,18811:up Kng1,16644:up Efemp1,216616:up Saa3,20210:up Vdr,22337:down Pdia5,72599:down Fabp4,11770:up Htra2a,15558:down Gas6,14456:up Col1a1,12814:down Sfrp1,20377:up Tgfb3,21814:up C1qtnf3,81799:down Tll1,21892:down Ceacam1,26365:up Sfrp2,20319:up Pamr1,210622:up Tnfrsf11b,18383:up Prkar2b,19088:up Npnt,114249:up S100a1,20193:up Ice1,218333:down Neur1,214854:down Ccl7,20306:up Cst7,13011:up Pdgc,54635:down Pdzn3,55983:down Epas1,13819:up Sema7a,20361:down Ddah1,69219:down Fkbp10,14230:down Sdpr,20324:down Man2a2,140481:up Ccl12,20293:up Bmpr1a,12166:down Klk1b11,16613:up Tnc,21923:down Ret,19713:up Prg4,96875:down Sdf2l1,64136:up C1s2,317677:up Creb3l1,26427:down Kitl,17311:up P4ha1,18451:down Hp,15439:up Aoah,27052:up Ras11a,68895:up Ccl3,20302:up Plat,18791:down Ctla2a,13024:down Adamts12,239337:down Lrrc15,74488:down Anpep,16790:up Pparg,19016:up Lmcd1,30937:up Glp1r,14652:down Hmox1,15368:up Has2,15117:down Grem1,23892:up Phf11d,219132:up Col5a1,12831:down Errfi1,74155:down |
| regulation of adaptive immune response                     | GO:0002819 | 2.34E-02 | 7.14E-02 | Tnf,21926:up Cd24a,12484:down Cd4,12504:up C3,12266:up Tfrc,22042:up Iir1,17082:down                                                                                                                                                                                                                                                                                                                                                                                                                                                                                                                                                                                                                                                                                                                                                                                                                                                                                                                                                                                                                                                                                                                                                                                                                                                                                                                                                                                                                                                                                                                                                                                                                                                                                                                                                                                                                                                                                                                                                                                                                                                                                                                                                                                                                                                                  |
| regulation of Ran protein signal transduction              | GO:0032015 | 2.37E-02 | 7.20E-02 | Ccl9,20308:up Ccl6,20305:up Wnt5a,22418:down Ccl7,20306:up Ccl2,20296:up Ccl12,20293:up Ccl4,20303:up Ccl3,20302:up Ccl8,20307:up                                                                                                                                                                                                                                                                                                                                                                                                                                                                                                                                                                                                                                                                                                                                                                                                                                                                                                                                                                                                                                                                                                                                                                                                                                                                                                                                                                                                                                                                                                                                                                                                                                                                                                                                                                                                                                                                                                                                                                                                                                                                                                                                                                                                                     |
| regulation of GTPase activity                              | GO:0043087 | 2.37E-02 | 7.20E-02 | Ccl9,20308:up Ccl6,20305:up Wnt5a,22418:down Ccl7,20306:up Ccl2,20296:up Ccl12,20293:up Ccl4,20303:up Ccl3,20302:up Ccl8,20307:up                                                                                                                                                                                                                                                                                                                                                                                                                                                                                                                                                                                                                                                                                                                                                                                                                                                                                                                                                                                                                                                                                                                                                                                                                                                                                                                                                                                                                                                                                                                                                                                                                                                                                                                                                                                                                                                                                                                                                                                                                                                                                                                                                                                                                     |
| positive regulation of macromolecule biosynthetic process  | GO:0010557 | 2.41E-02 | 7.33E-02 | Fstl3,83554:down Ice1,218333:down Ccl2,20296:up Pdgc,54635:down Epas1,13819:up Lyl1,17095:up Sdpr,20324:down Trf,22041:up Wnt5a,22418:down Bmpr1a,12166:down Bmp4,12159:up Igf1,16000:up Ret,19713:up Tgfb2,21808:down Plpp3,67916:up Creb3l1,26427:down Fgfr2,14183:up Kitl,17311:up Pri2c2,18811:up Ras11a,68895:up Inhba,16323:down Ccl3,20302:up Vdr,22337:down Vegfa,22339:down Igf2,16002:up Slc40a1,53945:up Tnf,21926:up Pparg,19016:up Glp1r,14652:down Egfr,13649:down Fgfr1,14182:down Sfrp1,20377:up Has2,15117:down Tgfb3,21814:up Grem1,23892:up Sfrp2,20319:up Npnt,114249:up                                                                                                                                                                                                                                                                                                                                                                                                                                                                                                                                                                                                                                                                                                                                                                                                                                                                                                                                                                                                                                                                                                                                                                                                                                                                                                                                                                                                                                                                                                                                                                                                                                                                                                                                                          |

|                                                                            |            |          |          |                                                                                                                                                                                                                                         |
|----------------------------------------------------------------------------|------------|----------|----------|-----------------------------------------------------------------------------------------------------------------------------------------------------------------------------------------------------------------------------------------|
| Ran protein signal transduction                                            | GO:0031291 | 2.42E-02 | 7.37E-02 | Ccl9,20308:up Ccl6,20305:up Wnt5a,22418:down Ccl7,20306:up Ccl2,20296:up Ccl12,20293:up Ccl4,20303:up Ccl3,20302:up Ccl8,20307:up                                                                                                       |
| regulation of Rap protein signal transduction                              | GO:0032487 | 2.42E-02 | 7.37E-02 | Ccl9,20308:up Ccl6,20305:up Wnt5a,22418:down Ccl7,20306:up Ccl2,20296:up Ccl12,20293:up Ccl4,20303:up Ccl3,20302:up Ccl8,20307:up                                                                                                       |
| forebrain neuron differentiation                                           | GO:0021879 | 2.44E-02 | 7.40E-02 | Fgfr1,14182:down Wnt5a,22418:down Inhba,16323:down Fgfr2,14183:up                                                                                                                                                                       |
| telencephalon cell migration                                               | GO:0022029 | 2.44E-02 | 7.40E-02 | Fgfr1,14182:down Egfr,13649:down Cxcl12,20315:up Cx3cr1,13051:down                                                                                                                                                                      |
| regulation of cell killing                                                 | GO:0031341 | 2.44E-02 | 7.40E-02 | Ceacam1,26365:up Clec2d,93694:up Ccl2,20296:up lgf2,16002:up                                                                                                                                                                            |
| zymogen activation                                                         | GO:0031638 | 2.46E-02 | 7.45E-02 | Tnf,21926:up Pparg,19016:up Serpine2,20720:up Plat,18791:down F3,14066:up                                                                                                                                                               |
| response to alcohol                                                        | GO:0097305 | 2.48E-02 | 7.51E-02 | Vdr,22337:down Egfr,13649:down Inhba,16323:down Ccl7,20306:up Mmp2,17390:down Cdo1,12583:up Bmp4,12159:up                                                                                                                               |
| regulation of Rab protein signal transduction                              | GO:0032483 | 2.48E-02 | 7.51E-02 | Ccl9,20308:up Ccl6,20305:up Wnt5a,22418:down Ccl7,20306:up Ccl2,20296:up Ccl12,20293:up Ccl4,20303:up Ccl3,20302:up Ccl8,20307:up                                                                                                       |
| viral process                                                              | GO:0016032 | 2.49E-02 | 7.51E-02 | Tnf,21926:up Gas6,14456:up Lmcd1,30937:up Ptx3,19288:up Cd4,12504:up Slpi,20568:up Ccl4,20303:up fit3,15959:up Ceacam1,26365:up Cxcl9,17329:up Oasl1,231655:up ffit1,15957:up Lrrc15,74488:down Oas3,246727:up                          |
| T cell activation                                                          | GO:0042110 | 2.49E-02 | 7.51E-02 | Cd24a,12484:down Ly9,17085:up Ccl2,20296:up Cd4,12504:up Tfrc,22042:up lgf1,16000:up Bmp4,12159:up Ctla2a,13024:down Ceacam1,26365:up Cxcl12,20315:up lgf2,16002:up Clec4e,56619:up Tnfsf9,21950:up                                     |
| T cell aggregation                                                         | GO:0070489 | 2.49E-02 | 7.51E-02 | Cd24a,12484:down Ly9,17085:up Ccl2,20296:up Cd4,12504:up Tfrc,22042:up lgf1,16000:up Bmp4,12159:up Ctla2a,13024:down Ceacam1,26365:up Cxcl12,20315:up lgf2,16002:up Clec4e,56619:up Tnfsf9,21950:up                                     |
| regulation of receptor internalization                                     | GO:0002090 | 2.50E-02 | 7.51E-02 | Vegfa,22339:down Sfrp4,20379:up Grem1,23892:up                                                                                                                                                                                          |
| positive regulation of multicellular organismal metabolic process          | GO:0044253 | 2.50E-02 | 7.51E-02 | Pparg,19016:up Ccl2,20296:up Bmp4,12159:up                                                                                                                                                                                              |
| dopamine metabolic process                                                 | GO:0042417 | 2.50E-02 | 7.51E-02 | Tgfb2,21808:down Maob,109731:up Epas1,13819:up                                                                                                                                                                                          |
| glucan biosynthetic process                                                | GO:0009250 | 2.50E-02 | 7.51E-02 | Enpp1,18605:down lgf2,16002:up lgf1,16000:up                                                                                                                                                                                            |
| positive regulation of heart contraction                                   | GO:0045823 | 2.50E-02 | 7.51E-02 | Glp1r,14652:down Adm,11535:up Tgfb2,21808:down                                                                                                                                                                                          |
| forebrain neuron development                                               | GO:0021884 | 2.50E-02 | 7.51E-02 | Fgfr1,14182:down Wnt5a,22418:down Fgfr2,14183:up                                                                                                                                                                                        |
| T cell migration                                                           | GO:0072678 | 2.50E-02 | 7.51E-02 | Cxcl12,20315:up Wnt5a,22418:down Ccl2,20296:up                                                                                                                                                                                          |
| negative regulation of cellular carbohydrate metabolic process             | GO:0010677 | 2.50E-02 | 7.51E-02 | C1qtnf3,81799:down Enpp1,18605:down Adipoq,11450:up                                                                                                                                                                                     |
| glycogen biosynthetic process                                              | GO:0005978 | 2.50E-02 | 7.51E-02 | Enpp1,18605:down lgf2,16002:up lgf1,16000:up                                                                                                                                                                                            |
| endocardial cushion development                                            | GO:0003197 | 2.50E-02 | 7.51E-02 | Tgfb2,21808:down Bmpr1a,12166:down Bmp4,12159:up                                                                                                                                                                                        |
| lipid biosynthetic process                                                 | GO:0008610 | 2.54E-02 | 7.61E-02 | Htr2b,15559:down Ggt5,23887:up Tnf,21926:up Akr1c18,105349:up Fabp5,16592:up Lpl,16956:up Aldh1a2,19378:up C3,12266:up Ptgs2,19225:down lgf1,16000:up Vdr,22337:down Ceacam1,26365:up Htr2a,15558:down Aldh1a3,56847:down lgf2,16002:up |
| lymphocyte aggregation                                                     | GO:0071593 | 2.54E-02 | 7.61E-02 | Cd24a,12484:down Ly9,17085:up Ccl2,20296:up Cd4,12504:up Tfrc,22042:up lgf1,16000:up Bmp4,12159:up Ctla2a,13024:down Ceacam1,26365:up Cxcl12,20315:up lgf2,16002:up Clec4e,56619:up Tnfsf9,21950:up                                     |
| regulation of Ral protein signal transduction                              | GO:0032485 | 2.55E-02 | 7.61E-02 | Ccl9,20308:up Ccl6,20305:up Wnt5a,22418:down Ccl7,20306:up Ccl2,20296:up Ccl12,20293:up Ccl4,20303:up Ccl3,20302:up Ccl8,20307:up                                                                                                       |
| Ral protein signal transduction                                            | GO:0032484 | 2.55E-02 | 7.61E-02 | Ccl9,20308:up Ccl6,20305:up Wnt5a,22418:down Ccl7,20306:up Ccl2,20296:up Ccl12,20293:up Ccl4,20303:up Ccl3,20302:up Ccl8,20307:up                                                                                                       |
| organic hydroxy compound transport                                         | GO:0015850 | 2.56E-02 | 7.61E-02 | Sncg,20618:up Maob,109731:up Adipoq,11450:up Gpm6b,14758:up Cxcl12,20315:up Emb,13723:up Htr2a,15558:down Slc16a4,229699:down                                                                                                           |
| chronic inflammatory response                                              | GO:0002544 | 2.57E-02 | 7.61E-02 | Tnf,21926:up Cx3cr1,13051:down                                                                                                                                                                                                          |
| negative regulation of fibroblast growth factor receptor signaling pathway | GO:0040037 | 2.57E-02 | 7.61E-02 | Sulf1,240725:down Wnt5a,22418:down                                                                                                                                                                                                      |
| activation of phospholipase C activity                                     | GO:0007202 | 2.57E-02 | 7.61E-02 | Htr2b,15559:down Htr2a,15558:down                                                                                                                                                                                                       |
| positive regulation of hormone biosynthetic process                        | GO:0046886 | 2.57E-02 | 7.61E-02 | lgf2,16002:up lgf1,16000:up                                                                                                                                                                                                             |
| regulation of monocyte chemotactic protein-1 production                    | GO:0071637 | 2.57E-02 | 7.61E-02 | C1qtnf3,81799:down Adipoq,11450:up                                                                                                                                                                                                      |
| establishment of monopolar cell polarity                                   | GO:0061162 | 2.57E-02 | 7.61E-02 | Ptk7,71461:down Wnt5a,22418:down                                                                                                                                                                                                        |

|                                                                         |            |          |          |                                                                                                                                                                                                                             |
|-------------------------------------------------------------------------|------------|----------|----------|-----------------------------------------------------------------------------------------------------------------------------------------------------------------------------------------------------------------------------|
| chondroitin sulfate proteoglycan biosynthetic process                   | GO:0050650 | 2.57E-02 | 7.61E-02 | Chst11,58250:down Igf1,16000:up                                                                                                                                                                                             |
| positive regulation of glycogen metabolic process                       | GO:0070875 | 2.57E-02 | 7.61E-02 | Igf2,16002:up Igf1,16000:up                                                                                                                                                                                                 |
| white fat cell differentiation                                          | GO:0050872 | 2.57E-02 | 7.61E-02 | Pparg,19016:up Fabp4,11770:up                                                                                                                                                                                               |
| regulation of endothelial cell chemotaxis                               | GO:2001026 | 2.57E-02 | 7.61E-02 | Fgfr1,14182:down Vegfa,22339:down                                                                                                                                                                                           |
| glycoprotein catabolic process                                          | GO:0006516 | 2.57E-02 | 7.61E-02 | Hpse,15442:up Adamts12,239337:down                                                                                                                                                                                          |
| positive regulation of endothelial cell apoptotic process               | GO:2000353 | 2.57E-02 | 7.61E-02 | Akr1c18,105349:up Bmp4,12159:up                                                                                                                                                                                             |
| regulation of response to tumor cell                                    | GO:0002834 | 2.57E-02 | 7.61E-02 | Ceacam1,26365:up Cd24a,12484:down                                                                                                                                                                                           |
| endothelial tube morphogenesis                                          | GO:0061154 | 2.57E-02 | 7.61E-02 | Adamts12,239337:down Bmp4,12159:up                                                                                                                                                                                          |
| detection of mechanical stimulus involved in sensory perception of pain | GO:0050966 | 2.57E-02 | 7.61E-02 | Tnf,21926:up Htr2a,15558:down                                                                                                                                                                                               |
| regulation of immune response to tumor cell                             | GO:0002837 | 2.57E-02 | 7.61E-02 | Ceacam1,26365:up Cd24a,12484:down                                                                                                                                                                                           |
| monocyte chemotactic protein-1 production                               | GO:0071605 | 2.57E-02 | 7.61E-02 | C1qtnf3,81799:down Adipoq,11450:up                                                                                                                                                                                          |
| metanephric renal vesicle morphogenesis                                 | GO:0072283 | 2.57E-02 | 7.61E-02 | Grem1,23892:up Bmp4,12159:up                                                                                                                                                                                                |
| positive regulation of glycolytic process                               | GO:0045821 | 2.57E-02 | 7.61E-02 | Htr2a,15558:down Igf1,16000:up                                                                                                                                                                                              |
| positive regulation of glycogen biosynthetic process                    | GO:0045725 | 2.57E-02 | 7.61E-02 | Igf2,16002:up Igf1,16000:up                                                                                                                                                                                                 |
| regulation of cell growth involved in cardiac muscle cell development   | GO:0061050 | 2.57E-02 | 7.61E-02 | Wisp1,22402:down Igf1,16000:up                                                                                                                                                                                              |
| glomerular epithelium development                                       | GO:0072010 | 2.57E-02 | 7.61E-02 | Bmp4,12159:up Adipoq,11450:up                                                                                                                                                                                               |
| regulation of lipase activity                                           | GO:0060191 | 2.57E-02 | 7.61E-02 | Htr2b,15559:down Fgfr1,14182:down Htr2a,15558:down Fgfr2,14183:up                                                                                                                                                           |
| regulation of glucose import                                            | GO:0046324 | 2.57E-02 | 7.61E-02 | Tnf,21926:up Enpp1,18605:down Igf1,16000:up Adipoq,11450:up                                                                                                                                                                 |
| regulation of cell junction assembly                                    | GO:1901888 | 2.57E-02 | 7.61E-02 | Tnf,21926:up Gpm6b,14758:up Vegfa,22339:down Grem1,23892:up                                                                                                                                                                 |
| regulation of muscle cell apoptotic process                             | GO:0010660 | 2.57E-02 | 7.61E-02 | Sfrp2,20319:up Hmox1,15368:up Igf1,16000:up Igf1,16000:up                                                                                                                                                                   |
| regulation of muscle adaptation                                         | GO:0043502 | 2.57E-02 | 7.61E-02 | Lmcd1,30937:up Wisp1,22402:down Errf1,74155:down Igf1,16000:up                                                                                                                                                              |
| cardiocyte differentiation                                              | GO:0035051 | 2.60E-02 | 7.70E-02 | Vegfa,22339:down Tgfb2,21808:down Wisp1,22402:down Grem1,23892:up Igf1,16000:up Bmp4,12159:up                                                                                                                               |
| regulation of Cdc42 protein signal transduction                         | GO:0032489 | 2.61E-02 | 7.70E-02 | Ccl9,20308:up Ccl6,20305:up Wnt5a,22418:down Ccl7,20306:up Ccl2,20296:up Ccl12,20293:up Ccl4,20303:up Ccl3,20302:up Ccl8,20307:up                                                                                           |
| striated muscle cell differentiation                                    | GO:0051146 | 2.61E-02 | 7.70E-02 | Wisp1,22402:down Grem1,23892:up Igf1,16000:up Bmp4,12159:up Ccl8,20307:up Cxcl9,17329:up Cxcl12,20315:up Vegfa,22339:down Igf2,16002:up                                                                                     |
| Rab protein signal transduction                                         | GO:0032482 | 2.61E-02 | 7.70E-02 | Ccl9,20308:up Ccl6,20305:up Wnt5a,22418:down Ccl7,20306:up Ccl2,20296:up Ccl12,20293:up Ccl4,20303:up Ccl3,20302:up Ccl8,20307:up                                                                                           |
| multi-organism cellular process                                         | GO:0044764 | 2.62E-02 | 7.72E-02 | Tnf,21926:up Gas6,14456:up Lmcd1,30937:up Ptx3,19288:up Cd4,12504:up Slpi,20568:up Ccl4,20303:up Iifit3,15959:up Ceacam1,26365:up Cxcl9,17329:up Oasl1,231655:up Iifit1,15957:up Lrrc15,74488:down Oas3,246727:up           |
| small molecule biosynthetic process                                     | GO:0044283 | 2.62E-02 | 7.72E-02 | Ggt5,23887:up Tnf,21926:up Akr1c18,105349:up Fabp5,16592:up Lpl,16956:up C1qtnf3,81799:down Aldh1a2,19378:up Ptgs2,19225:down Adipoq,11450:up Vdr,22337:down Sord,20322:up Gatm,67092:down Aldh1a3,56847:down Cdo1,12583:up |
| organic hydroxy compound biosynthetic process                           | GO:1901617 | 2.63E-02 | 7.76E-02 | Tnf,21926:up Akr1c18,105349:up Fabp5,16592:up Wnt5a,22418:down Epas1,13819:up Vdr,22337:down Pdxk,216134:up Tgfb2,21808:down                                                                                                |
| negative regulation of nervous system development                       | GO:0051961 | 2.64E-02 | 7.79E-02 | Tnf,21926:up Plk2,20620:down Cd24a,12484:down Efemp1,216616:up Wnt5a,22418:down Bmpr1a,12166:down Dpysl3,22240:down Ednrb,13618:up Col3a1,12825:down Bmp4,12159:up                                                          |
| positive regulation of leukocyte mediated immunity                      | GO:0002705 | 2.67E-02 | 7.86E-02 | Tnf,21926:up Cd24a,12484:down Ccl2,20296:up C3,12266:up Tfrc,22042:up                                                                                                                                                       |
| interferon-gamma production                                             | GO:0032609 | 2.67E-02 | 7.86E-02 | Tnf,21926:up Gas6,14456:up Wnt5a,22418:down Il1r1,17082:down Tnfsf9,21950:up                                                                                                                                                |
| ammonium transport                                                      | GO:0015696 | 2.67E-02 | 7.86E-02 | Gpm6b,14758:up Cxcl12,20315:up Htr2a,15558:down Snca,20618:up Maob,109731:up                                                                                                                                                |

|                                                         |            |          |          |                                                                                                                                                                                                                                                                                                                                                                                                                                                                                                                                                                                                           |
|---------------------------------------------------------|------------|----------|----------|-----------------------------------------------------------------------------------------------------------------------------------------------------------------------------------------------------------------------------------------------------------------------------------------------------------------------------------------------------------------------------------------------------------------------------------------------------------------------------------------------------------------------------------------------------------------------------------------------------------|
| neuromuscular junction development                      | GO:0007528 | 2.69E-02 | 7.88E-02 | Tnc,21923:down Pdzn3,55983:down Fgfr2,14183:up                                                                                                                                                                                                                                                                                                                                                                                                                                                                                                                                                            |
| positive regulation of biomineral tissue development    | GO:0070169 | 2.69E-02 | 7.88E-02 | Gpm6b,14758:up Bmpr1a,12166:down Bmp4,12159:up                                                                                                                                                                                                                                                                                                                                                                                                                                                                                                                                                            |
| mammary gland duct morphogenesis                        | GO:0060603 | 2.69E-02 | 7.88E-02 | Vdr,22337:down Wnt5a,22418:down Fgfr2,14183:up                                                                                                                                                                                                                                                                                                                                                                                                                                                                                                                                                            |
| pituitary gland development                             | GO:0021983 | 2.69E-02 | 7.88E-02 | Wnt5a,22418:down Bmpr1a,12166:down Bmp4,12159:up                                                                                                                                                                                                                                                                                                                                                                                                                                                                                                                                                          |
| regulation of lipid storage                             | GO:0010883 | 2.69E-02 | 7.88E-02 | Pparg,19016:up Lpl,16956:up C3,12266:up                                                                                                                                                                                                                                                                                                                                                                                                                                                                                                                                                                   |
| regulation of hormone metabolic process                 | GO:0032350 | 2.69E-02 | 7.88E-02 | Akr1c18,105349:up Igf2,16002:up Igf1,16000:up                                                                                                                                                                                                                                                                                                                                                                                                                                                                                                                                                             |
| defense response to other organism                      | GO:0098542 | 2.71E-02 | 7.92E-02 | Adamts4,240913:down Tnf,21926:up Lmcd1,30937:up Adm,11535:up Hp,15439:up Cd4,12504:up Slpi,20568:up Ifit3,15959:up Clec4n,56620:up Cxcl9,17329:up Oasl1,231655:up Ifit1,15957:up Oas3,246727:up Clec4e,56619:up                                                                                                                                                                                                                                                                                                                                                                                           |
| cardiac cell development                                | GO:0055006 | 2.71E-02 | 7.92E-02 | Vegfa,22339:down Wisp1,22402:down Igf1,16000:up Bmp4,12159:up                                                                                                                                                                                                                                                                                                                                                                                                                                                                                                                                             |
| ureteric bud morphogenesis                              | GO:0060675 | 2.71E-02 | 7.92E-02 | Vegfa,22339:down Npnt,114249:up Grem1,23892:up Bmp4,12159:up                                                                                                                                                                                                                                                                                                                                                                                                                                                                                                                                              |
| Cdc42 protein signal transduction                       | GO:0032488 | 2.73E-02 | 8.00E-02 | Ccl9,20308:up Ccl6,20305:up Wnt5a,22418:down Ccl7,20306:up Ccl2,20296:up Ccl12,20293:up Ccl4,20303:up Ccl3,20302:up Ccl8,20307:up                                                                                                                                                                                                                                                                                                                                                                                                                                                                         |
| mesonephric tubule morphogenesis                        | GO:0072171 | 2.85E-02 | 8.32E-02 | Vegfa,22339:down Npnt,114249:up Grem1,23892:up Bmp4,12159:up                                                                                                                                                                                                                                                                                                                                                                                                                                                                                                                                              |
| forebrain cell migration                                | GO:0021885 | 2.85E-02 | 8.32E-02 | Fgfr1,14182:down Egfr,13649:down Cxcl12,20315:up Cx3cr1,13051:down                                                                                                                                                                                                                                                                                                                                                                                                                                                                                                                                        |
| regulation of Rac protein signal transduction           | GO:0035020 | 2.87E-02 | 8.37E-02 | Ccl9,20308:up Ccl6,20305:up Wnt5a,22418:down Ccl7,20306:up Ccl2,20296:up Ccl12,20293:up Ccl4,20303:up Ccl3,20302:up Ccl8,20307:up                                                                                                                                                                                                                                                                                                                                                                                                                                                                         |
| positive regulation of gene expression                  | GO:0010628 | 2.89E-02 | 8.41E-02 | Fstl3,83554:down Ice1,218333:down Sfrp4,20379:up Aldh1a2,19378:up C3,12266:up Epas1,13819:up Ly1,17095:up Sdpr,20324:down Trf,22041:up Wnt5a,22418:down Bmpr1a,12166:down Bmp4,12159:up Igf1,16000:up Tnc,21923:down Ret,19713:up Tgfb2,21808:down Plpp3,67916:up Creb3l1,26427:down Fgfr2,14183:up Pri2c2,18811:up Rasl11a,68895:up Inhba,16323:down Ccl3,20302:up Vdr,22337:down Vegfa,22339:down Igf2,16002:up Slc40a1,53945:up Pparg,19016:up Gas6,14456:up Tnf,21926:up Glp1r,14652:down Egfr,13649:down Fgfr1,14182:down Sfrp1,20377:up Tgfb3,21814:up Grem1,23892:up Sfrp2,20319:up Npnt,114249:up |
| heterotypic cell-cell adhesion                          | GO:0034113 | 2.89E-02 | 8.41E-02 | Tnf,21926:up Il1rn,16181:up Adipoq,11450:up                                                                                                                                                                                                                                                                                                                                                                                                                                                                                                                                                               |
| myoblast fusion                                         | GO:0007520 | 2.89E-02 | 8.41E-02 | Ccl8,20307:up Cxcl9,17329:up Cxcl12,20315:up                                                                                                                                                                                                                                                                                                                                                                                                                                                                                                                                                              |
| cochlea development                                     | GO:0090102 | 2.89E-02 | 8.41E-02 | Cthrc1,68588:down Ptk7,71461:down Wnt5a,22418:down                                                                                                                                                                                                                                                                                                                                                                                                                                                                                                                                                        |
| regulation of endothelial cell apoptotic process        | GO:2000351 | 2.89E-02 | 8.41E-02 | Gas6,14456:up Akr1c18,105349:up Bmp4,12159:up                                                                                                                                                                                                                                                                                                                                                                                                                                                                                                                                                             |
| dopamine transport                                      | GO:0015872 | 2.89E-02 | 8.41E-02 | Cxcl12,20315:up Htr2a,15558:down Snca,20618:up                                                                                                                                                                                                                                                                                                                                                                                                                                                                                                                                                            |
| segmentation                                            | GO:0035282 | 2.89E-02 | 8.42E-02 | Sfrp2,20319:up Sfrp1,20377:up Wnt5a,22418:down Bmpr1a,12166:down Bmp4,12159:up                                                                                                                                                                                                                                                                                                                                                                                                                                                                                                                            |
| cellular response to steroid hormone stimulus           | GO:0071383 | 2.92E-02 | 8.45E-02 | Pparg,19016:up Akr1c18,105349:up Egfr,13649:down Sfrp1,20377:up Igf1,16000:up Bmp4,12159:up Vdr,22337:down Mmp2,17390:down                                                                                                                                                                                                                                                                                                                                                                                                                                                                                |
| regulation of steroid hormone biosynthetic process      | GO:0090030 | 2.93E-02 | 8.45E-02 | Igf2,16002:up Igf1,16000:up                                                                                                                                                                                                                                                                                                                                                                                                                                                                                                                                                                               |
| positive regulation of cofactor metabolic process       | GO:0051194 | 2.93E-02 | 8.45E-02 | Htr2a,15558:down Igf1,16000:up                                                                                                                                                                                                                                                                                                                                                                                                                                                                                                                                                                            |
| establishment or maintenance of monopolar cell polarity | GO:0061339 | 2.93E-02 | 8.45E-02 | Ptk7,71461:down Wnt5a,22418:down                                                                                                                                                                                                                                                                                                                                                                                                                                                                                                                                                                          |
| lateral mesoderm development                            | GO:0048368 | 2.93E-02 | 8.45E-02 | Fgfr1,14182:down Bmpr1a,12166:down                                                                                                                                                                                                                                                                                                                                                                                                                                                                                                                                                                        |
| positive regulation of coenzyme metabolic process       | GO:0051197 | 2.93E-02 | 8.45E-02 | Htr2a,15558:down Igf1,16000:up                                                                                                                                                                                                                                                                                                                                                                                                                                                                                                                                                                            |
| response to stilbenoid                                  | GO:0035634 | 2.93E-02 | 8.45E-02 | Ifit3,15959:up Saa3,20210:up                                                                                                                                                                                                                                                                                                                                                                                                                                                                                                                                                                              |
| negative regulation of platelet activation              | GO:0010544 | 2.93E-02 | 8.45E-02 | Ceacam1,26365:up Serpine2,20720:up                                                                                                                                                                                                                                                                                                                                                                                                                                                                                                                                                                        |
| positive regulation of cellular amine metabolic process | GO:0033240 | 2.93E-02 | 8.45E-02 | Maob,109731:up Epas1,13819:up                                                                                                                                                                                                                                                                                                                                                                                                                                                                                                                                                                             |
| positive regulation of macrophage activation            | GO:0043032 | 2.93E-02 | 8.45E-02 | Wnt5a,22418:down Il1rl1,17082:down                                                                                                                                                                                                                                                                                                                                                                                                                                                                                                                                                                        |
| negative regulation of amino acid transport             | GO:0051956 | 2.93E-02 | 8.45E-02 | Tnf,21926:up Il1rn,16181:up                                                                                                                                                                                                                                                                                                                                                                                                                                                                                                                                                                               |
| forebrain morphogenesis                                 | GO:0048853 | 2.93E-02 | 8.45E-02 | Uchl5,56207:up Wnt5a,22418:down                                                                                                                                                                                                                                                                                                                                                                                                                                                                                                                                                                           |

|                                                                                              |             |          |          |                                                                                                                                                            |
|----------------------------------------------------------------------------------------------|-------------|----------|----------|------------------------------------------------------------------------------------------------------------------------------------------------------------|
| leukocyte migration involved in inflammatory response                                        | GO:0002523  | 2.93E-02 | 8.45E-02 | Cd24a,12484:down Ccl2,20296:up                                                                                                                             |
| immune response to tumor cell                                                                | GO:0002418  | 2.93E-02 | 8.45E-02 | Ceacam1,26365:up Cd24a,12484:down                                                                                                                          |
| regulation of NFAT protein import into nucleus                                               | GO:00051532 | 2.93E-02 | 8.45E-02 | Ceacam1,26365:up Tnf,21926:up                                                                                                                              |
| positive regulation of extrinsic apoptotic signaling pathway in absence of ligand            | GO:2001241  | 2.93E-02 | 8.45E-02 | Tgfb2,21808:down Inhba,16323:down                                                                                                                          |
| positive regulation of ion transmembrane transport                                           | GO:00034767 | 2.98E-02 | 8.58E-02 | Fxyd1,56188:up Cxcl12,20315:up Ccl12,20293:up Stc1,20855:up S100a1,20193:up Bmp4,12159:up                                                                  |
| cellular response to molecule of bacterial origin                                            | GO:00071219 | 2.98E-02 | 8.58E-02 | Ankrd1,107765:down Tnf,21926:up Mrc1,17533:up Wnt5a,22418:down Ccl2,20296:up Ccl12,20293:up                                                                |
| diencephalon development                                                                     | GO:00021536 | 2.99E-02 | 8.62E-02 | Ncam1,17967:down Wnt5a,22418:down Bmpr1a,12166:down Bmp4,12159:up                                                                                          |
| isoprenoid metabolic process                                                                 | GO:00006720 | 2.99E-02 | 8.62E-02 | Crabp2,12904:down Akr1c18,105349:up Aldh1a2,19378:up Aldh1a3,56847:down                                                                                    |
| regulation of viral process                                                                  | GO:00050792 | 3.00E-02 | 8.65E-02 | Tnf,21926:up Lmcd1,30937:up Ptx3,19288:up Slpi,20568:up Ccl4,20303:up Ceacam1,26365:up Oasl1,231655:up fit1,15957:up Oas3,246727:up                        |
| embryonic placenta development                                                               | GO:0001892  | 3.01E-02 | 8.65E-02 | Adm,11535:up Egfr,13649:down Gjb5,14622:down Fgfr2,14183:up Epas1,13819:up                                                                                 |
| negative regulation of endopeptidase activity                                                | GO:00010951 | 3.01E-02 | 8.65E-02 | Gas6,14456:up Sfrp2,20319:up Vegfa,22339:down Slpi,20568:up lgf1,16000:up                                                                                  |
| positive regulation of cell morphogenesis involved in differentiation                        | GO:00010770 | 3.05E-02 | 8.76E-02 | Tnfrsf12a,27279:down Crabp2,12904:down Has2,15117:down Cxcl12,20315:up Vegfa,22339:down Tgfb2,21808:down Sema7a,20361:down                                 |
| regulation of synapse structure or activity                                                  | GO:00050803 | 3.07E-02 | 8.82E-02 | Plk2,20620:down Flrt2,399558:down Ncam1,17967:down Wnt5a,22418:down Ptgs2,19225:down Srxp2,68792:down Serpine2,20720:up Cx3cr1,13051:down Thbs2,21826:down |
| regulation of interleukin-1 beta production                                                  | GO:00032651 | 3.10E-02 | 8.87E-02 | Wnt5a,22418:down Errfi1,74155:down Ccl3,20302:up                                                                                                           |
| hindlimb morphogenesis                                                                       | GO:00035137 | 3.10E-02 | 8.87E-02 | Bmpr1a,12166:down Rspo2,239405:up Bmp4,12159:up                                                                                                            |
| positive regulation of oxidoreductase activity                                               | GO:00051353 | 3.10E-02 | 8.87E-02 | Vdr,22337:down Htr2b,15559:down Tnf,21926:up                                                                                                               |
| positive regulation of interleukin-8 production                                              | GO:00032757 | 3.10E-02 | 8.87E-02 | Tnf,21926:up Wnt5a,22418:down Adipoq,11450:up                                                                                                              |
| heart valve development                                                                      | GO:00003170 | 3.10E-02 | 8.87E-02 | Tgfb2,21808:down Bmpr1a,12166:down Bmp4,12159:up                                                                                                           |
| mechanoreceptor differentiation                                                              | GO:00042490 | 3.14E-02 | 8.98E-02 | Cthrc1,68588:down Fgfr1,14182:down Mcoln3,171166:up Bmp4,12159:up                                                                                          |
| modification of morphology or physiology of other organism involved in symbiotic interaction | GO:00051817 | 3.14E-02 | 8.98E-02 | Ceacam1,26365:up Ptx3,19288:up Cd4,12504:up Ccl4,20303:up                                                                                                  |
| cellular aldehyde metabolic process                                                          | GO:00006081 | 3.14E-02 | 8.98E-02 | Akr1c18,105349:up Pdxx,216134:up Aldh1a2,19378:up Aldh1a3,56847:down                                                                                       |
| regulation of ARF protein signal transduction                                                | GO:00032012 | 3.14E-02 | 8.98E-02 | Ccl9,20308:up Ccl6,20305:up Wnt5a,22418:down Ccl7,20306:up Ccl2,20296:up Ccl12,20293:up Ccl4,20303:up Ccl3,20302:up Ccl8,20307:up                          |
| ARF protein signal transduction                                                              | GO:00032011 | 3.14E-02 | 8.98E-02 | Ccl9,20308:up Ccl6,20305:up Wnt5a,22418:down Ccl7,20306:up Ccl2,20296:up Ccl12,20293:up Ccl4,20303:up Ccl3,20302:up Ccl8,20307:up                          |
| liver development                                                                            | GO:0001889  | 3.25E-02 | 9.20E-02 | Ceacam1,26365:up Hp,15439:up Hmox1,15368:up Tgfb3,21814:up Bmp4,12159:up                                                                                   |
| lymphocyte proliferation                                                                     | GO:00046651 | 3.29E-02 | 9.20E-02 | Cd24a,12484:down Cd4,12504:up Tfrc,22042:up lgf1,16000:up Bmp4,12159:up Ceacam1,26365:up Cxcl12,20315:up lgf2,16002:up Tnfsf9,21950:up                     |
| positive regulation of interleukin-6 production                                              | GO:00032755 | 3.30E-02 | 9.20E-02 | Tnf,21926:up Wnt5a,22418:down Figf,14205:up Tnfsf9,21950:up                                                                                                |
| positive regulation of production of molecular mediator of immune response                   | GO:0002702  | 3.30E-02 | 9.20E-02 | Ceacam1,26365:up Wnt5a,22418:down Tfrc,22042:up Sema7a,20361:down                                                                                          |
| muscle cell apoptotic process                                                                | GO:00010657 | 3.30E-02 | 9.20E-02 | Sfrp2,20319:up Hmox1,15368:up lgfbp3,16009:up lgf1,16000:up                                                                                                |
| positive regulation of interleukin-1 secretion                                               | GO:00050716 | 3.31E-02 | 9.20E-02 | Wnt5a,22418:down Ccl3,20302:up                                                                                                                             |
| positive regulation of nucleotide catabolic process                                          | GO:00030813 | 3.31E-02 | 9.20E-02 | Htr2a,15558:down lgf1,16000:up                                                                                                                             |
| mesenchymal to epithelial transition                                                         | GO:00060231 | 3.31E-02 | 9.20E-02 | Grem1,23892:up Bmp4,12159:up                                                                                                                               |

|                                                                                  |            |          |          |                                                                                                                                                         |
|----------------------------------------------------------------------------------|------------|----------|----------|---------------------------------------------------------------------------------------------------------------------------------------------------------|
| regulation of thymocyte apoptotic process                                        | GO:0070243 | 3.31E-02 | 9.20E-02 | Wnt5a,22418:down Bmp4,12159:up                                                                                                                          |
| spongiotrophoblast layer development                                             | GO:0060712 | 3.31E-02 | 9.20E-02 | Adm,11535:up Gjb5,14622:down                                                                                                                            |
| negative regulation of bone mineralization                                       | GO:0030502 | 3.31E-02 | 9.20E-02 | Fam101b,76566:down Grem1,23892:up                                                                                                                       |
| regulation of transcription involved in cell fate commitment                     | GO:0060850 | 3.31E-02 | 9.20E-02 | Pparg,19016:up Bmp4,12159:up                                                                                                                            |
| NFAT protein import into nucleus                                                 | GO:0051531 | 3.31E-02 | 9.20E-02 | Ceacam1,26365:up Tnf,21926:up                                                                                                                           |
| positive regulation of interleukin-1 beta secretion                              | GO:0050718 | 3.31E-02 | 9.20E-02 | Wnt5a,22418:down Ccl3,20302:up                                                                                                                          |
| regulation of calcineurin-NFAT signaling cascade                                 | GO:0070884 | 3.31E-02 | 9.20E-02 | Lmcd1,30937:up Igf1,16000:up                                                                                                                            |
| growth plate cartilage development                                               | GO:0003417 | 3.31E-02 | 9.20E-02 | Stc1,20855:up Mmp13,17386:up                                                                                                                            |
| regulation of fibroblast apoptotic process                                       | GO:2000269 | 3.31E-02 | 9.20E-02 | Gas6,14456:up Sfrp1,20377:up                                                                                                                            |
| regulation of immunoglobulin secretion                                           | GO:0051023 | 3.31E-02 | 9.20E-02 | Ceacam1,26365:up Tnf,21926:up                                                                                                                           |
| hydrogen peroxide catabolic process                                              | GO:0042744 | 3.31E-02 | 9.20E-02 | Pxdn,69675:down Hp,15439:up                                                                                                                             |
| type B pancreatic cell development                                               | GO:0003323 | 3.31E-02 | 9.20E-02 | Wnt5a,22418:down Bmp4,12159:up                                                                                                                          |
| sulfur compound catabolic process                                                | GO:0044273 | 3.31E-02 | 9.20E-02 | Hpse,15442:up Cdo1,12583:up                                                                                                                             |
| negative regulation of epithelial cell apoptotic process                         | GO:1904036 | 3.31E-02 | 9.20E-02 | Gas6,14456:up Hmox1,15368:up Igf1,16000:up                                                                                                              |
| keratinocyte proliferation                                                       | GO:0043616 | 3.31E-02 | 9.20E-02 | Vdr,22337:down Has2,15117:down Cd109,235505:down                                                                                                        |
| phenol-containing compound biosynthetic process                                  | GO:0046189 | 3.31E-02 | 9.20E-02 | Wnt5a,22418:down Tgfb2,21808:down Epas1,13819:up                                                                                                        |
| positive regulation of small GTPase mediated signal transduction                 | GO:0051057 | 3.31E-02 | 9.20E-02 | Col3a1,12825:down Kitl,17311:up Igf1,16000:up                                                                                                           |
| regulation of neuron death                                                       | GO:1901214 | 3.34E-02 | 9.20E-02 | Tnf,21926:up Glp1r,14652:down Hmox1,15368:up Ccl12,20293:up Ccl3,20302:up Igf1,16000:up Crif1,12931:down Vegfa,22339:down Tgfb2,21808:down Mt1,17748:up |
| positive regulation of ion transport                                             | GO:0043270 | 3.36E-02 | 9.20E-02 | Fxyd1,56188:up Ccl12,20293:up Cd4,12504:up Stc1,20855:up Ccl4,20303:up Bmp4,12159:up Fam132b,27358:down Cxcl12,20315:up S100a1,20193:up                 |
| nephron epithelium development                                                   | GO:0072009 | 3.37E-02 | 9.20E-02 | Vegfa,22339:down Npnt,114249:up Grem1,23892:up Bmp4,12159:up Adipoq,11450:up                                                                            |
| regulation of JAK-STAT cascade                                                   | GO:0046425 | 3.38E-02 | 9.20E-02 | Flrt2,399558:down Crif1,12931:down Ret,19713:up Lrrc15,74488:down Aspn,66695:down Igf1,16000:up                                                         |
| central imidazole amino acid metabolic process                                   | GO:0006575 | 3.41E-02 | 9.20E-02 | P4ha1,18451:down Ggt5,23887:up Gstm1,14862:up Ddah1,69219:down Gstt1,14871:up Gatm,67092:down Serinc2,230779:down                                       |
| regulation of cysteine-type endopeptidase activity involved in apoptotic process | GO:0043281 | 3.41E-02 | 9.20E-02 | Tnf,21926:up Pparg,19016:up Gas6,14456:up Sfrp2,20319:up Vegfa,22339:down F3,14066:up Igf1,16000:up                                                     |
| mononuclear cell proliferation                                                   | GO:0032943 | 3.44E-02 | 9.20E-02 | Cd24a,12484:down Cd4,12504:up Tfrc,22042:up Igf1,16000:up Bmp4,12159:up Ceacam1,26365:up Cxcl12,20315:up Igf2,16002:up Tnfsf9,21950:up                  |
| regulation of receptor-mediated endocytosis                                      | GO:0048259 | 3.45E-02 | 9.20E-02 | Trf,22041:up Vegfa,22339:down Sfrp4,20379:up Grem1,23892:up                                                                                             |
| multi-multicellular organism process                                             | GO:0044706 | 3.49E-02 | 9.20E-02 | Vdr,22337:down Akr1c18,105349:up Hpgd,15446:up Ptgs2,19225:down Mmp2,17390:down Serpine2,20720:up                                                       |
| keratinocyte differentiation                                                     | GO:0030216 | 3.50E-02 | 9.20E-02 | Vdr,22337:down Tgfb2,21808:down Ptgs2,19225:down Cd109,235505:down Errfi1,74155:down                                                                    |
| erythrocyte differentiation                                                      | GO:0030218 | 3.50E-02 | 9.20E-02 | Vegfa,22339:down Inhba,16323:down Tgfbr3,21814:up Epas1,13819:up Bmp4,12159:up                                                                          |
| cardiac muscle cell differentiation                                              | GO:0055007 | 3.50E-02 | 9.20E-02 | Vegfa,22339:down Wisp1,22402:down Grem1,23892:up Igf1,16000:up Bmp4,12159:up                                                                            |
| detection of abiotic stimulus                                                    | GO:0009582 | 3.50E-02 | 9.20E-02 | Tnf,21926:up Col11a1,12814:down Htr2a,15558:down Serpine2,20720:up Igf1,16000:up                                                                        |

|                                                                                                     |            |          |          |                                                                                                                                                                                                                                                                                                                                                                                                                                                                                                                                                                                                                                                                                                                                                                                                                                                                                                                                                                                                                                                                                                                                                                     |
|-----------------------------------------------------------------------------------------------------|------------|----------|----------|---------------------------------------------------------------------------------------------------------------------------------------------------------------------------------------------------------------------------------------------------------------------------------------------------------------------------------------------------------------------------------------------------------------------------------------------------------------------------------------------------------------------------------------------------------------------------------------------------------------------------------------------------------------------------------------------------------------------------------------------------------------------------------------------------------------------------------------------------------------------------------------------------------------------------------------------------------------------------------------------------------------------------------------------------------------------------------------------------------------------------------------------------------------------|
| regulation of biosynthetic process                                                                  | GO:0009889 | 3.51E-02 | 9.20E-02 | Fstl3,83554:down Adm,11535:up Tfec,21426:up Sfrp4,20379:up C3,12266:up Ankrd1,107765:down Lyl1,17095:up Loxl2,94352:down Loxl3,16950:down Trf,22041:up Wnt5a,22418:down Adipoq,11450:up Bmp4,12159:up Igf1,16000:up Tgfb2,21808:down Ptgir,19222:up Fgfr2,14183:up Htr2b,15559:down Pri2c2,18811:up Efemp1,216616:up Vdr,22337:down Fabp4,11770:up Htr2a,15558:down Slc40a1,53945:up Gas6,14456:up Egfr,13649:down Sfrp1,20377:up C1qtnf3,81799:down Tgfb3,21814:up Ceacam1,26365:up Sfrp2,20319:up Npnt,114249:up Slc100a1,20193:up Ice1,218333:down Ccl2,20296:up Ednrb,13618:up Pdgfc,54635:down Epas1,13819:up Uchl5,56207:up Htra3,78558:down Ddah1,69219:down Sdpr,20324:down Ptx3,19288:up Akr1c18,105349:up Bmpr1a,12166:down Ccl4,20303:up Ret,19713:up Prg4,96875:down Plpp3,67916:up Creb3l1,26427:down Kitl,17311:up Rasl11a,68895:up Inhba,16323:down Bnc2,242509:down Ccl3,20302:up Vegfa,22339:down Igf2,16002:up Tnf,21926:up Pparg,19016:up Lmcd1,30937:up Glp1r,14652:down Fgfr1,14182:down Hmox1,15368:up Has2,15117:down Sulf1,240725:down Ptgs2,19225:down Grem1,23892:up Phf11d,219132:up Tbx15,21384:down Enpp1,18605:down Errfi1,74155:down |
| forelimb morphogenesis                                                                              | GO:0035136 | 3.53E-02 | 9.20E-02 | Crabp2,12904:down Rspo2,239405:up Aldh1a2,19378:up                                                                                                                                                                                                                                                                                                                                                                                                                                                                                                                                                                                                                                                                                                                                                                                                                                                                                                                                                                                                                                                                                                                  |
| negative regulation of osteoblast differentiation                                                   | GO:0045668 | 3.53E-02 | 9.20E-02 | Tnf,21926:up Fgfr1,14182:down Sfrp1,20377:up                                                                                                                                                                                                                                                                                                                                                                                                                                                                                                                                                                                                                                                                                                                                                                                                                                                                                                                                                                                                                                                                                                                        |
| tumor necrosis factor-mediated signaling pathway                                                    | GO:0033209 | 3.53E-02 | 9.20E-02 | Tnf,21926:up Gas6,14456:up Adipoq,11450:up                                                                                                                                                                                                                                                                                                                                                                                                                                                                                                                                                                                                                                                                                                                                                                                                                                                                                                                                                                                                                                                                                                                          |
| endothelial cell apoptotic process                                                                  | GO:0072577 | 3.53E-02 | 9.20E-02 | Gas6,14456:up Akr1c18,105349:up Bmp4,12159:up                                                                                                                                                                                                                                                                                                                                                                                                                                                                                                                                                                                                                                                                                                                                                                                                                                                                                                                                                                                                                                                                                                                       |
| cellular response to retinoic acid                                                                  | GO:0071300 | 3.53E-02 | 9.20E-02 | Ret,19713:up Ptk7,71461:down Aldh1a2,19378:up                                                                                                                                                                                                                                                                                                                                                                                                                                                                                                                                                                                                                                                                                                                                                                                                                                                                                                                                                                                                                                                                                                                       |
| positive regulation of nucleic acid-templated transcription                                         | GO:1903508 | 3.55E-02 | 9.20E-02 | Fstl3,83554:down Ice1,218333:down Epas1,13819:up Lyl1,17095:up Sdpr,20324:down Trf,22041:up Wnt5a,22418:down Bmpr1a,12166:down Bmp4,12159:up Igf1,16000:up Ret,19713:up Plpp3,67916:up Creb3l1,26427:down Fgfr2,14183:up Pri2c2,18811:up Rasl11a,68895:up Inhba,16323:down Ccl3,20302:up Vdr,22337:down Vegfa,22339:down Igf2,16002:up Slc40a1,53945:up Tnf,21926:up Pparg,19016:up Glp1r,14652:down Egfr,13649:down Fgfr1,14182:down Sfrp1,20377:up Tgfb3,21814:up Grem1,23892:up Sfrp2,20319:up Npnt,114249:up                                                                                                                                                                                                                                                                                                                                                                                                                                                                                                                                                                                                                                                    |
| positive regulation of transcription, DNA-templated                                                 | GO:0045893 | 3.55E-02 | 9.20E-02 | Fstl3,83554:down Ice1,218333:down Epas1,13819:up Lyl1,17095:up Sdpr,20324:down Trf,22041:up Wnt5a,22418:down Bmpr1a,12166:down Bmp4,12159:up Igf1,16000:up Ret,19713:up Plpp3,67916:up Creb3l1,26427:down Fgfr2,14183:up Pri2c2,18811:up Rasl11a,68895:up Inhba,16323:down Ccl3,20302:up Vdr,22337:down Vegfa,22339:down Igf2,16002:up Slc40a1,53945:up Tnf,21926:up Pparg,19016:up Glp1r,14652:down Egfr,13649:down Fgfr1,14182:down Sfrp1,20377:up Tgfb3,21814:up Grem1,23892:up Sfrp2,20319:up Npnt,114249:up                                                                                                                                                                                                                                                                                                                                                                                                                                                                                                                                                                                                                                                    |
| epithelial cell development                                                                         | GO:002064  | 3.56E-02 | 9.20E-02 | Tnf,21926:up Fgfr1,14182:down Wnt5a,22418:down Stc1,20855:up Grem1,23892:up Bmp4,12159:up Adipoq,11450:up Fgfr2,14183:up                                                                                                                                                                                                                                                                                                                                                                                                                                                                                                                                                                                                                                                                                                                                                                                                                                                                                                                                                                                                                                            |
| chemoattraction of axon                                                                             | GO:0061642 | 3.58E-02 | 9.20E-02 | Wnt5a,22418:down                                                                                                                                                                                                                                                                                                                                                                                                                                                                                                                                                                                                                                                                                                                                                                                                                                                                                                                                                                                                                                                                                                                                                    |
| halogenated hydrocarbon metabolic process                                                           | GO:0042197 | 3.58E-02 | 9.20E-02 | Gstt1,14871:up                                                                                                                                                                                                                                                                                                                                                                                                                                                                                                                                                                                                                                                                                                                                                                                                                                                                                                                                                                                                                                                                                                                                                      |
| positive regulation of protein activation cascade                                                   | GO:2000259 | 3.58E-02 | 9.20E-02 | C3,12266:up                                                                                                                                                                                                                                                                                                                                                                                                                                                                                                                                                                                                                                                                                                                                                                                                                                                                                                                                                                                                                                                                                                                                                         |
| negative regulation of natural killer cell mediated cytotoxicity directed against tumor cell target | GO:002859  | 3.58E-02 | 9.20E-02 | Ceacam1,26365:up                                                                                                                                                                                                                                                                                                                                                                                                                                                                                                                                                                                                                                                                                                                                                                                                                                                                                                                                                                                                                                                                                                                                                    |
| modulation by host of viral catalytic activity                                                      | GO:0044867 | 3.58E-02 | 9.20E-02 | Ptx3,19288:up                                                                                                                                                                                                                                                                                                                                                                                                                                                                                                                                                                                                                                                                                                                                                                                                                                                                                                                                                                                                                                                                                                                                                       |
| negative regulation by host of viral exo-alpha-sialidase activity                                   | GO:0044869 | 3.58E-02 | 9.20E-02 | Ptx3,19288:up                                                                                                                                                                                                                                                                                                                                                                                                                                                                                                                                                                                                                                                                                                                                                                                                                                                                                                                                                                                                                                                                                                                                                       |
| regulation of sodium-dependent phosphate transport                                                  | GO:2000118 | 3.58E-02 | 9.20E-02 | Sfrp4,20379:up                                                                                                                                                                                                                                                                                                                                                                                                                                                                                                                                                                                                                                                                                                                                                                                                                                                                                                                                                                                                                                                                                                                                                      |
| cloaca development                                                                                  | GO:0035844 | 3.58E-02 | 9.20E-02 | Bmp4,12159:up                                                                                                                                                                                                                                                                                                                                                                                                                                                                                                                                                                                                                                                                                                                                                                                                                                                                                                                                                                                                                                                                                                                                                       |
| pyridoxal phosphate metabolic process                                                               | GO:0042822 | 3.58E-02 | 9.20E-02 | Pdxk,216134:up                                                                                                                                                                                                                                                                                                                                                                                                                                                                                                                                                                                                                                                                                                                                                                                                                                                                                                                                                                                                                                                                                                                                                      |
| mesenchymal cell differentiation involved in lung development                                       | GO:0060915 | 3.58E-02 | 9.20E-02 | Fgfr2,14183:up                                                                                                                                                                                                                                                                                                                                                                                                                                                                                                                                                                                                                                                                                                                                                                                                                                                                                                                                                                                                                                                                                                                                                      |
| monocyte homeostasis                                                                                | GO:0035702 | 3.58E-02 | 9.20E-02 | Ccl2,20296:up                                                                                                                                                                                                                                                                                                                                                                                                                                                                                                                                                                                                                                                                                                                                                                                                                                                                                                                                                                                                                                                                                                                                                       |
| negative regulation of dendritic cell apoptotic process                                             | GO:2000669 | 3.58E-02 | 9.20E-02 | Gas6,14456:up                                                                                                                                                                                                                                                                                                                                                                                                                                                                                                                                                                                                                                                                                                                                                                                                                                                                                                                                                                                                                                                                                                                                                       |
| cellular response to jasmonic acid stimulus                                                         | GO:0071395 | 3.58E-02 | 9.20E-02 | Akr1c18,105349:up                                                                                                                                                                                                                                                                                                                                                                                                                                                                                                                                                                                                                                                                                                                                                                                                                                                                                                                                                                                                                                                                                                                                                   |
| erythrocyte aggregation                                                                             | GO:0034117 | 3.58E-02 | 9.20E-02 | Cd24a,12484:down                                                                                                                                                                                                                                                                                                                                                                                                                                                                                                                                                                                                                                                                                                                                                                                                                                                                                                                                                                                                                                                                                                                                                    |
| sorbitol metabolic process                                                                          | GO:006060  | 3.58E-02 | 9.20E-02 | Sord,20322:up                                                                                                                                                                                                                                                                                                                                                                                                                                                                                                                                                                                                                                                                                                                                                                                                                                                                                                                                                                                                                                                                                                                                                       |
| positive regulation of blood microparticle formation                                                | GO:2000334 | 3.58E-02 | 9.20E-02 | Tnf,21926:up                                                                                                                                                                                                                                                                                                                                                                                                                                                                                                                                                                                                                                                                                                                                                                                                                                                                                                                                                                                                                                                                                                                                                        |

|                                                                                                |             |          |          |                    |
|------------------------------------------------------------------------------------------------|-------------|----------|----------|--------------------|
| aorta smooth muscle tissue morphogenesis                                                       | GO:0060414  | 3.58E-02 | 9.20E-02 | Col3a1,12825:down  |
| negative regulation of immune response to tumor cell                                           | GO:0002838  | 3.58E-02 | 9.20E-02 | Ceacam1,26365:up   |
| creatine biosynthetic process                                                                  | GO:0006601  | 3.58E-02 | 9.20E-02 | Gatm,67092:down    |
| blood microparticle formation                                                                  | GO:00072564 | 3.58E-02 | 9.20E-02 | Tnf,21926:up       |
| negative regulation of bone trabecula formation                                                | GO:1900155  | 3.58E-02 | 9.20E-02 | Grem1,23892:up     |
| hypophysis morphogenesis                                                                       | GO:00048850 | 3.58E-02 | 9.20E-02 | Wnt5a,22418:down   |
| negative regulation of chondrocyte development                                                 | GO:00061182 | 3.58E-02 | 9.20E-02 | Fam101b,76566:down |
| positive regulation of T cell mediated immune response to tumor cell                           | GO:0002842  | 3.58E-02 | 9.20E-02 | Cd24a,12484:down   |
| positive regulation of fibroblast growth factor production                                     | GO:00090271 | 3.58E-02 | 9.20E-02 | Ptgs2,19225:down   |
| pyrimidine nucleoside transport                                                                | GO:00015864 | 3.58E-02 | 9.20E-02 | Slc29a1,63959:up   |
| renal protein absorption                                                                       | GO:00097017 | 3.58E-02 | 9.20E-02 | Adipoq,11450:up    |
| regulation of exo-alpha-sialidase activity                                                     | GO:1903015  | 3.58E-02 | 9.20E-02 | Ptx3,19288:up      |
| mating plug formation                                                                          | GO:00042628 | 3.58E-02 | 9.20E-02 | Serpine2,20720:up  |
| vitamin B6 metabolic process                                                                   | GO:00042816 | 3.58E-02 | 9.20E-02 | Pdkk,216134:up     |
| regulation of transcription from RNA polymerase II promoter involved in kidney development     | GO:00060994 | 3.58E-02 | 9.20E-02 | Bmp4,12159:up      |
| modulation by host of viral exo-alpha-sialidase activity                                       | GO:00044866 | 3.58E-02 | 9.20E-02 | Ptx3,19288:up      |
| regulation of mesenchymal stem cell proliferation                                              | GO:1902460  | 3.58E-02 | 9.20E-02 | Bmp4,12159:up      |
| cellular response to cisplatin                                                                 | GO:00072719 | 3.58E-02 | 9.20E-02 | Hmox1,15368:up     |
| lateral sprouting involved in mammary gland duct morphogenesis                                 | GO:00060599 | 3.58E-02 | 9.20E-02 | Wnt5a,22418:down   |
| canonical wnt signaling pathway involved in positive regulation of wound healing               | GO:00044330 | 3.58E-02 | 9.20E-02 | Plpp3,67916:up     |
| post-mating behavior                                                                           | GO:00045297 | 3.58E-02 | 9.20E-02 | Serpine2,20720:up  |
| canonical Wnt signaling pathway involved in regulation of type B pancreatic cell proliferation | GO:00044343 | 3.58E-02 | 9.20E-02 | Sfrp1,20377:up     |
| mesodermal to mesenchymal transition involved in gastrulation                                  | GO:00060809 | 3.58E-02 | 9.20E-02 | Wnt5a,22418:down   |
| negative regulation of secondary metabolite biosynthetic process                               | GO:1900377  | 3.58E-02 | 9.20E-02 | Wnt5a,22418:down   |
| activation of plasma proteins involved in acute inflammatory response                          | GO:00002541 | 3.58E-02 | 9.20E-02 | F3,14066:up        |
| cloacal septation                                                                              | GO:00060197 | 3.58E-02 | 9.20E-02 | Bmp4,12159:up      |
| negative regulation of L-glutamate transport                                                   | GO:00002037 | 3.58E-02 | 9.20E-02 | Tnf,21926:up       |
| cervix development                                                                             | GO:00060067 | 3.58E-02 | 9.20E-02 | Wnt5a,22418:down   |



|                                                                                             |            |          |          |                    |
|---------------------------------------------------------------------------------------------|------------|----------|----------|--------------------|
| BMP signaling pathway involved in heart induction                                           | GO:0003130 | 3.58E-02 | 9.20E-02 | Bmp4,12159:up      |
| metanephric glomerular visceral epithelial cell differentiation                             | GO:0072248 | 3.58E-02 | 9.20E-02 | Adipoq,11450:up    |
| response to cisplatin                                                                       | GO:0072718 | 3.58E-02 | 9.20E-02 | Hmox1,15368:up     |
| positive regulation of adiponectin secretion                                                | GO:0070165 | 3.58E-02 | 9.20E-02 | C1qtnf3,81799:down |
| endodermal-mesodermal cell signaling                                                        | GO:0003133 | 3.58E-02 | 9.20E-02 | Bmp4,12159:up      |
| metanephric glomerular epithelial cell development                                          | GO:0072313 | 3.58E-02 | 9.20E-02 | Adipoq,11450:up    |
| regulation of hydrogen peroxide catabolic process                                           | GO:2000295 | 3.58E-02 | 9.20E-02 | Hp,15439:up        |
| endocardial cushion fusion                                                                  | GO:0003274 | 3.58E-02 | 9.20E-02 | Tgfb2,21808:down   |
| regulation of bone trabecula formation                                                      | GO:1900154 | 3.58E-02 | 9.20E-02 | Grem1,23892:up     |
| granulocyte colony-stimulating factor signaling pathway                                     | GO:0038158 | 3.58E-02 | 9.20E-02 | Ceacam1,26365:up   |
| bile acid signaling pathway                                                                 | GO:0038183 | 3.58E-02 | 9.20E-02 | Vdr,22337:down     |
| planar cell polarity pathway involved in pericardium morphogenesis                          | GO:0061354 | 3.58E-02 | 9.20E-02 | Wnt5a,22418:down   |
| positive regulation of translational initiation by iron                                     | GO:0045994 | 3.58E-02 | 9.20E-02 | Tnf,21926:up       |
| response to lead ion                                                                        | GO:0010288 | 3.58E-02 | 9.20E-02 | Ncam1,17967:down   |
| neural crest cell fate commitment                                                           | GO:0014034 | 3.58E-02 | 9.20E-02 | Sfrp1,20377:up     |
| fibroblast growth factor receptor signaling pathway involved in mammary gland specification | GO:0060595 | 3.58E-02 | 9.20E-02 | Fgfr2,14183:up     |
| cellular response to UV-A                                                                   | GO:0071492 | 3.58E-02 | 9.20E-02 | Mme,17380:up       |
| regulation of pancreatic stellate cell proliferation                                        | GO:2000229 | 3.58E-02 | 9.20E-02 | Pparg,19016:up     |
| immune complex clearance by monocytes and macrophages                                       | GO:0002436 | 3.58E-02 | 9.20E-02 | Ccl2,20296:up      |
| response to jasmonic acid                                                                   | GO:0009753 | 3.58E-02 | 9.20E-02 | Akr1c18,105349:up  |
| negative regulation of interferon-gamma-mediated signaling pathway                          | GO:0060336 | 3.58E-02 | 9.20E-02 | Pparg,19016:up     |
| metanephric glomerular visceral epithelial cell development                                 | GO:0072249 | 3.58E-02 | 9.20E-02 | Adipoq,11450:up    |
| alditol catabolic process                                                                   | GO:0019405 | 3.58E-02 | 9.20E-02 | Sord,20322:up      |
| positive regulation of immune complex clearance by monocytes and macrophages                | GO:0090265 | 3.58E-02 | 9.20E-02 | Ccl2,20296:up      |
| regulation of blood microparticle formation                                                 | GO:2000332 | 3.58E-02 | 9.20E-02 | Tnf,21926:up       |
| regulation of T cell mediated immune response to tumor cell                                 | GO:0002840 | 3.58E-02 | 9.20E-02 | Cd24a,12484:down   |
| T cell mediated immune response to tumor cell                                               | GO:0002424 | 3.58E-02 | 9.20E-02 | Cd24a,12484:down   |

|                                                                                        |            |          |          |                   |
|----------------------------------------------------------------------------------------|------------|----------|----------|-------------------|
| positive regulation of dopamine biosynthetic process                                   | GO:1903181 | 3.58E-02 | 9.20E-02 | Epas1,13819:up    |
| chlorinated hydrocarbon metabolic process                                              | GO:0042196 | 3.58E-02 | 9.20E-02 | Gstt1,14871:up    |
| regulation of erythrocyte aggregation                                                  | GO:0034118 | 3.58E-02 | 9.20E-02 | Cd24a,12484:down  |
| vacuolar phosphate transport                                                           | GO:0007037 | 3.58E-02 | 9.20E-02 | Fgfr1,14182:down  |
| negative regulation of melanin biosynthetic process                                    | GO:0048022 | 3.58E-02 | 9.20E-02 | Wnt5a,22418:down  |
| planar cell polarity pathway involved in gastrula mediolateral intercalation           | GO:0060775 | 3.58E-02 | 9.20E-02 | Wnt5a,22418:down  |
| pancreatic stellate cell proliferation                                                 | GO:0072343 | 3.58E-02 | 9.20E-02 | Pparg,19016:up    |
| negative regulation by host of symbiont catalytic activity                             | GO:0052403 | 3.58E-02 | 9.20E-02 | Ptx3,19288:up     |
| chronic inflammatory response to non-antigenic stimulus                                | GO:0002545 | 3.58E-02 | 9.20E-02 | Cx3cr1,13051:down |
| helper T cell enhancement of adaptive immune response                                  | GO:0035397 | 3.58E-02 | 9.20E-02 | Cd4,12504:up      |
| negative regulation of platelet-derived growth factor receptor-alpha signaling pathway | GO:2000584 | 3.58E-02 | 9.20E-02 | Adipoq,11450:up   |
| positive regulation of platelet-derived growth factor receptor signaling pathway       | GO:0010641 | 3.58E-02 | 9.20E-02 | F3,14066:up       |
| sesquiterpenoid catabolic process                                                      | GO:0016107 | 3.58E-02 | 9.20E-02 | Akr1c18,105349:up |
| regulation of platelet-derived growth factor receptor-alpha signaling pathway          | GO:2000583 | 3.58E-02 | 9.20E-02 | Adipoq,11450:up   |
| negative regulation of exo-alpha-sialidase activity                                    | GO:1903016 | 3.58E-02 | 9.20E-02 | Ptx3,19288:up     |
| seminal vesicle development                                                            | GO:0061107 | 3.58E-02 | 9.20E-02 | Serpine2,20720:up |
| helper T cell extravasation                                                            | GO:0035684 | 3.58E-02 | 9.20E-02 | Ccl2,20296:up     |
| negative regulation of complement activation, lectin pathway                           | GO:0001869 | 3.58E-02 | 9.20E-02 | Serping1,12258:up |
| farnesol catabolic process                                                             | GO:0016488 | 3.58E-02 | 9.20E-02 | Akr1c18,105349:up |
| negative regulation of natural killer cell mediated immune response to tumor cell      | GO:0002856 | 3.58E-02 | 9.20E-02 | Ceacam1,26365:up  |
| regulation of mitotic cell cycle DNA replication                                       | GO:1903463 | 3.58E-02 | 9.20E-02 | Fgfr1,14182:down  |
| L-cysteine catabolic process to taurine                                                | GO:0019452 | 3.58E-02 | 9.20E-02 | Cdo1,12583:up     |
| positive regulation of protein kinase C activity                                       | GO:1900020 | 3.58E-02 | 9.20E-02 | Wnt5a,22418:down  |
| intermediate mesoderm development                                                      | GO:0048389 | 3.58E-02 | 9.20E-02 | Bmp4,12159:up     |
| sesquiterpenoid metabolic process                                                      | GO:0006714 | 3.58E-02 | 9.20E-02 | Akr1c18,105349:up |
| negative regulation of interleukin-1-mediated signaling pathway                        | GO:2000660 | 3.58E-02 | 9.20E-02 | Il1rn,16181:up    |

|                                                                                                            |            |          |          |                   |
|------------------------------------------------------------------------------------------------------------|------------|----------|----------|-------------------|
| negative regulation of mast cell cytokine production                                                       | GO:0032764 | 3.58E-02 | 9.20E-02 | Hmox1,15368:up    |
| regulation of canonical Wnt signaling pathway involved in controlling type B pancreatic cell proliferation | GO:2000079 | 3.58E-02 | 9.20E-02 | Sfrp1,20377:up    |
| negative regulation of lymphocyte chemotaxis                                                               | GO:1901624 | 3.58E-02 | 9.20E-02 | Ccl12,20293:up    |
| regulation of protein kinase C activity                                                                    | GO:1900019 | 3.58E-02 | 9.20E-02 | Wnt5a,22418:down  |
| endodermal-mesodermal cell signaling involved in heart induction                                           | GO:0003134 | 3.58E-02 | 9.20E-02 | Bmp4,12159:up     |
| negative regulation of catalytic activity in other organism involved in symbiotic interaction              | GO:0052199 | 3.58E-02 | 9.20E-02 | Ptx3,19288:up     |
| divalent metal ion export                                                                                  | GO:0070839 | 3.58E-02 | 9.20E-02 | Slc40a1,53945:up  |
| regulation of sphingolipid mediated signaling pathway                                                      | GO:1902068 | 3.58E-02 | 9.20E-02 | Plpp3,67916:up    |
| farnesol metabolic process                                                                                 | GO:0016487 | 3.58E-02 | 9.20E-02 | Akr1c18,105349:up |
| negative regulation of response to interferon-gamma                                                        | GO:0060331 | 3.58E-02 | 9.20E-02 | Pparg,19016:up    |
| positive regulation of complement activation                                                               | GO:0045917 | 3.58E-02 | 9.20E-02 | C3,12266:up       |
| positive regulation of CD4-positive, alpha-beta T cell proliferation                                       | GO:2000563 | 3.58E-02 | 9.20E-02 | Ceacam1,26365:up  |
| esophagus smooth muscle contraction                                                                        | GO:0014846 | 3.58E-02 | 9.20E-02 | Sulf1,240725:down |
| mediolateral intercalation                                                                                 | GO:0060031 | 3.58E-02 | 9.20E-02 | Wnt5a,22418:down  |
| regulation of immune complex clearance by monocytes and macrophages                                        | GO:0090264 | 3.58E-02 | 9.20E-02 | Ccl2,20296:up     |
| pattern specification involved in mesonephros development                                                  | GO:0061227 | 3.58E-02 | 9.20E-02 | Bmp4,12159:up     |
| planar cell polarity pathway involved in outflow tract morphogenesis                                       | GO:0061347 | 3.58E-02 | 9.20E-02 | Wnt5a,22418:down  |
| metanephric S-shaped body morphogenesis                                                                    | GO:0072284 | 3.58E-02 | 9.20E-02 | Bmp4,12159:up     |
| planar cell polarity pathway involved in cardiac muscle tissue morphogenesis                               | GO:0061350 | 3.58E-02 | 9.20E-02 | Wnt5a,22418:down  |
| heme oxidation                                                                                             | GO:0006788 | 3.58E-02 | 9.20E-02 | Hmox1,15368:up    |
| metanephric glomerular epithelial cell differentiation                                                     | GO:0072312 | 3.58E-02 | 9.20E-02 | Adipoq,11450:up   |
| squamous basal epithelial stem cell differentiation involved in prostate gland acinus development          | GO:0060529 | 3.58E-02 | 9.20E-02 | Fgfr2,14183:up    |
| negative regulation of tooth mineralization                                                                | GO:0070171 | 3.58E-02 | 9.20E-02 | Aspn,66695:down   |
| branch elongation involved in salivary gland morphogenesis                                                 | GO:0060667 | 3.58E-02 | 9.20E-02 | Fgfr2,14183:up    |
| positive regulation of prolactin secretion                                                                 | GO:1902722 | 3.58E-02 | 9.20E-02 | Egfr,13649:down   |
| regulation of exocyst assembly                                                                             | GO:0001928 | 3.58E-02 | 9.20E-02 | Ncam1,17967:down  |
| mammary gland bud formation                                                                                | GO:0060615 | 3.58E-02 | 9.20E-02 | Fgfr2,14183:up    |

|                                                                             |            |          |          |                                                                                               |
|-----------------------------------------------------------------------------|------------|----------|----------|-----------------------------------------------------------------------------------------------|
| fructose biosynthetic process                                               | GO:0046370 | 3.58E-02 | 9.20E-02 | Sord,20322:up                                                                                 |
| positive regulation of chronic inflammatory response to antigenic stimulus  | GO:0002876 | 3.58E-02 | 9.20E-02 | Tnf,21926:up                                                                                  |
| heparan sulfate proteoglycan catabolic process                              | GO:0030200 | 3.58E-02 | 9.20E-02 | Hpse,15442:up                                                                                 |
| regulation of complement activation, lectin pathway                         | GO:0001868 | 3.58E-02 | 9.20E-02 | Serpig1,12258:up                                                                              |
| negative regulation by host of viral glycoprotein metabolic process         | GO:0044871 | 3.58E-02 | 9.20E-02 | Ptx3,19288:up                                                                                 |
| planar cell polarity pathway involved in ventricular septum morphogenesis   | GO:0061348 | 3.58E-02 | 9.20E-02 | Wnt5a,22418:down                                                                              |
| positive regulation of serine phosphorylation of STAT3 protein              | GO:1903263 | 3.58E-02 | 9.20E-02 | Ret,19713:up                                                                                  |
| chemokine (C-C motif) ligand 2 secretion                                    | GO:0035926 | 3.58E-02 | 9.20E-02 | Postn,50706:down                                                                              |
| taurine biosynthetic process                                                | GO:0042412 | 3.58E-02 | 9.20E-02 | Cdo1,12583:up                                                                                 |
| regulation of chronic inflammatory response to non-antigenic stimulus       | GO:0002880 | 3.58E-02 | 9.20E-02 | Cx3cr1,13051:down                                                                             |
| positive regulation of mesenchymal stem cell proliferation                  | GO:1902462 | 3.58E-02 | 9.20E-02 | Bmp4,12159:up                                                                                 |
| negative regulation of cardiac muscle hypertrophy in response to stress     | GO:1903243 | 3.58E-02 | 9.20E-02 | Errfi1,74155:down                                                                             |
| modulation by host of viral glycoprotein metabolic process                  | GO:0044870 | 3.58E-02 | 9.20E-02 | Ptx3,19288:up                                                                                 |
| positive regulation of platelet-derived growth factor production            | GO:0090362 | 3.58E-02 | 9.20E-02 | Ptgs2,19225:down                                                                              |
| growth plate cartilage morphogenesis                                        | GO:0003422 | 3.58E-02 | 9.20E-02 | Stc1,20855:up                                                                                 |
| negative regulation of response to tumor cell                               | GO:0002835 | 3.58E-02 | 9.20E-02 | Ceacam1,26365:up                                                                              |
| regulation of dopamine biosynthetic process                                 | GO:1903179 | 3.58E-02 | 9.20E-02 | Epas1,13819:up                                                                                |
| negative regulation of protein import into nucleus, translocation           | GO:0033159 | 3.58E-02 | 9.20E-02 | Gas6,14456:up                                                                                 |
| positive regulation of parathyroid hormone secretion                        | GO:2000830 | 3.58E-02 | 9.20E-02 | Fgfr1,14182:down                                                                              |
| regulation of translational initiation by iron                              | GO:0006447 | 3.58E-02 | 9.20E-02 | Tnf,21926:up                                                                                  |
| melanocyte proliferation                                                    | GO:0097325 | 3.58E-02 | 9.20E-02 | Wnt5a,22418:down                                                                              |
| pyridoxal phosphate biosynthetic process                                    | GO:0042823 | 3.58E-02 | 9.20E-02 | Pdxk,216134:up                                                                                |
| planar cell polarity pathway involved in cardiac right atrium morphogenesis | GO:0061349 | 3.58E-02 | 9.20E-02 | Wnt5a,22418:down                                                                              |
| anterior/posterior pattern specification involved in kidney development     | GO:0072098 | 3.58E-02 | 9.20E-02 | Bmp4,12159:up                                                                                 |
| regulation of lymphocyte differentiation                                    | GO:0045619 | 3.60E-02 | 9.23E-02 | Ctla2a,13024:down Gas6,14456:up Cd24a,12484:down Sfrp1,20377:up Tnfsf9,21950:up Bmp4,12159:up |
| hepaticobiliary system development                                          | GO:0061008 | 3.63E-02 | 9.30E-02 | Ceacam1,26365:up Hp,15439:up Hmox1,15368:up Tgfb3,21814:up Bmp4,12159:up                      |
| detection of external stimulus                                              | GO:0009581 | 3.63E-02 | 9.30E-02 | Tnf,21926:up Col11a1,12814:down Htr2a,15558:down Serpine2,20720:up Igf1,16000:up              |

|                                                                 |            |          |          |                                                                                                                                                                                                                                                                                                                                                                                                                                                                                                                                                                                                                                                                                                                                                                                                                                                                                                                                                                                                                                                                                                                                                                                                                                                                                                                                                                                                                                                                                                                                                                                                                                                                                                                                                                                                                                                                                                                                                                                                                                                                                                                                                                                                                                                                                                                                                                                                                                                                                                                                                                                                                          |
|-----------------------------------------------------------------|------------|----------|----------|--------------------------------------------------------------------------------------------------------------------------------------------------------------------------------------------------------------------------------------------------------------------------------------------------------------------------------------------------------------------------------------------------------------------------------------------------------------------------------------------------------------------------------------------------------------------------------------------------------------------------------------------------------------------------------------------------------------------------------------------------------------------------------------------------------------------------------------------------------------------------------------------------------------------------------------------------------------------------------------------------------------------------------------------------------------------------------------------------------------------------------------------------------------------------------------------------------------------------------------------------------------------------------------------------------------------------------------------------------------------------------------------------------------------------------------------------------------------------------------------------------------------------------------------------------------------------------------------------------------------------------------------------------------------------------------------------------------------------------------------------------------------------------------------------------------------------------------------------------------------------------------------------------------------------------------------------------------------------------------------------------------------------------------------------------------------------------------------------------------------------------------------------------------------------------------------------------------------------------------------------------------------------------------------------------------------------------------------------------------------------------------------------------------------------------------------------------------------------------------------------------------------------------------------------------------------------------------------------------------------------|
| negative regulation of protein serine/threonine kinase activity | GO:0071901 | 3.63E-02 | 9.30E-02 | Sfrp2,20319:up Sfrp1,20377:up Prkar2b,19088:up Bmp4,12159:up Adipoq,11450:up                                                                                                                                                                                                                                                                                                                                                                                                                                                                                                                                                                                                                                                                                                                                                                                                                                                                                                                                                                                                                                                                                                                                                                                                                                                                                                                                                                                                                                                                                                                                                                                                                                                                                                                                                                                                                                                                                                                                                                                                                                                                                                                                                                                                                                                                                                                                                                                                                                                                                                                                             |
| axonogenesis                                                    | GO:0074409 | 3.64E-02 | 9.33E-02 | Flrt2,399558:down Lama2,16773:down Plxnd1,67784:up Wnt5a,22418:down Sema7a,20361:down Tnfrsf12a,27279:down Crabp2,12904:down Ret,19713:up Cxcl12,20315:up Vegfa,22339:down Tgfb2,21808:down Fgfr2,14183:up                                                                                                                                                                                                                                                                                                                                                                                                                                                                                                                                                                                                                                                                                                                                                                                                                                                                                                                                                                                                                                                                                                                                                                                                                                                                                                                                                                                                                                                                                                                                                                                                                                                                                                                                                                                                                                                                                                                                                                                                                                                                                                                                                                                                                                                                                                                                                                                                               |
| positive regulation of RNA biosynthetic process                 | GO:1902680 | 3.65E-02 | 9.33E-02 | Fstl3,83554:down Ice1,218333:down Epas1,13819:up Lyl1,17095:up Sdpr,20324:down Trf,22041:up Wnt5a,22418:down Bmpr1a,12166:down Bmp4,12159:up Igf1,16000:up Ret,19713:up Ppp3,67916:up Creb3l1,26427:down Fgfr2,14183:up Prl2c2,18811:up Rasl11a,68895:up Inhba,16323:down Ccl3,20302:up Vdr,22337:down Vegfa,22339:down Igf2,16002:up Slc40a1,53945:up Tnf,21926:up Pparg,19016:up Glp1r,14652:down Egfr,13649:down Fgfr1,14182:down Sfrp1,20377:up Tgfb3,21814:up Grem1,23892:up Sfrp2,20319:up Npnt,114249:up                                                                                                                                                                                                                                                                                                                                                                                                                                                                                                                                                                                                                                                                                                                                                                                                                                                                                                                                                                                                                                                                                                                                                                                                                                                                                                                                                                                                                                                                                                                                                                                                                                                                                                                                                                                                                                                                                                                                                                                                                                                                                                          |
| cellular metabolic process                                      | GO:0044237 | 3.70E-02 | 9.40E-02 | Fstl3,83554:down Igf1,16000:up Adm,11535:up Flrt2,399558:down Tfec,21426:up Sfrp4,20379:up Lyl1,17095:up Gstt1,14871:up Blvrb,233016:up Igf3,16009:up Plk2,20620:down Cd24a,12484:down Mme,17380:up Fkbp14,231997:down Iir1,16181:up Maob,109731:up Bmp4,12159:up Hpse,15442:up Ptgir,19222:up Fgfr2,14183:up Htr2b,15559:down Dram1,71712:up Ccl6,20305:up Sipi,20568:up Aspn,66695:down Fam132b,227358:down Nabp1,109019:down Oas3,246727:up Slc40a1,53945:up Egfr,13649:down Alpl,11647:up Tfrc,22042:up Ccl8,20307:up Gstm1,14862:up Serpina3g,20715:up Fam20a,208659:down Aldh1a2,19378:up Ccl2,20296:up Ednrb,13618:up Ampd3,11717:up Mmp13,17386:up Htra3,78558:down Uchl5,56207:up Sord,20322:up Enpp3,209558:down Cdo1,12583:up Dok2,13449:up Mamdc2,71738:down Ptx3,19288:up Ccl4,20303:up Chst11,58250:down Vegfb,22340:up Aldh1a3,56847:down Ppp3,67916:up Ccl9,20308:up Inhba,16323:down Bnc2,242509:down Tfpi2,21789:down Crff1,12931:down Plod2,26432:down Vegfa,22339:down Gfpt2,14584:down Cbr2,12409:up Serpine2,20720:up Nxn,18230:down Igf2,16002:up Tnf,21926:up Fgfr1,14182:down Lpl,16956:up Sulf1,240725:down Cd4,12504:up Col3a1,12825:down Tbx15,21384:down Serpinc1,12258:up Uck2,80914:down Enpp1,18605:down Hpgd,15446:up C3,12266:up Enpp5,83965:up Ankrd1,107765:down Cd109,235505:down Ggt5,23887:up Loxl2,94352:down Trf,22041:up Loxl3,16950:down Wnt5a,22418:down Mark1,226778:up Adipoq,11450:up Hal,15109:up Igf1,16000:up Crabp2,12904:down Tgfb2,21808:down F3,14066:up Kng1,16644:up Prl2c2,18811:up Efemp1,216616:up Saah3,20210:up Vdr,22337:down Pdia5,72599:down Fabp4,11770:up Htr2a,15558:down Gas6,14456:up Col1a1,12814:down Sfrp1,20377:up C1qtnf3,81799:down Tgfb3,21814:up Serinc2,230779:down Ceacam1,26365:up Sfrp2,20319:up Pxdn,69675:down Tnfrsf11b,18383:up Prkar2b,19088:up Npnt,114249:up S100a1,20193:up Ice1,218333:down Neur3,214854:down Ccl7,20306:up Cst7,13011:up Pdgfc,54635:down Pdzn3,55983:down Epas1,13819:up Marc1,66112:up Sema7a,20361:down Ddah1,69219:down Fkbp10,14230:down Sdpr,20324:down Npl,74091:up Man2a2,140481:up Akr1c18,105349:up Fabp5,16592:up Ccl12,20293:up Bmpr1a,12166:down Gatm,67092:down Ret,19713:up Prg4,96875:down Sdf2l1,64136:up Pdxk,216134:up Creb3l1,26427:down Kitl,17311:up P4ha1,18451:down Hp,15439:up Aoah,27052:up Rasl11a,68895:up Ccl3,20302:up Plat,18791:down Ctla2a,13024:down Srxp2,68792:down Adams12,239337:down Lrrc15,74488:down Anpep,16790:up Pparg,19016:up Lmcd1,30937:up Glp1r,14652:down Hmox1,15368:up Has2,15117:down Ptgs2,19225:down Grem1,23892:up Phf11d,219132:up Errfi1,74155:down |
| cellular monovalent inorganic anion homeostasis                 | GO:0030320 | 3.70E-02 | 9.40E-02 | Stc1,20855:up Enpp1,18605:down                                                                                                                                                                                                                                                                                                                                                                                                                                                                                                                                                                                                                                                                                                                                                                                                                                                                                                                                                                                                                                                                                                                                                                                                                                                                                                                                                                                                                                                                                                                                                                                                                                                                                                                                                                                                                                                                                                                                                                                                                                                                                                                                                                                                                                                                                                                                                                                                                                                                                                                                                                                           |
| response to phenylpropanoid                                     | GO:0080184 | 3.70E-02 | 9.40E-02 | Ifit3,15959:up Saa3,20210:up                                                                                                                                                                                                                                                                                                                                                                                                                                                                                                                                                                                                                                                                                                                                                                                                                                                                                                                                                                                                                                                                                                                                                                                                                                                                                                                                                                                                                                                                                                                                                                                                                                                                                                                                                                                                                                                                                                                                                                                                                                                                                                                                                                                                                                                                                                                                                                                                                                                                                                                                                                                             |
| cellular response to monoamine stimulus                         | GO:0071868 | 3.70E-02 | 9.40E-02 | Htr2b,15559:down Adipoq,11450:up                                                                                                                                                                                                                                                                                                                                                                                                                                                                                                                                                                                                                                                                                                                                                                                                                                                                                                                                                                                                                                                                                                                                                                                                                                                                                                                                                                                                                                                                                                                                                                                                                                                                                                                                                                                                                                                                                                                                                                                                                                                                                                                                                                                                                                                                                                                                                                                                                                                                                                                                                                                         |
| tooth mineralization                                            | GO:0034505 | 3.70E-02 | 9.40E-02 | Fam20a,208659:down Aspn,66695:down                                                                                                                                                                                                                                                                                                                                                                                                                                                                                                                                                                                                                                                                                                                                                                                                                                                                                                                                                                                                                                                                                                                                                                                                                                                                                                                                                                                                                                                                                                                                                                                                                                                                                                                                                                                                                                                                                                                                                                                                                                                                                                                                                                                                                                                                                                                                                                                                                                                                                                                                                                                       |
| cardioblast differentiation                                     | GO:0010002 | 3.70E-02 | 9.40E-02 | Tgfb2,21808:down Grem1,23892:up                                                                                                                                                                                                                                                                                                                                                                                                                                                                                                                                                                                                                                                                                                                                                                                                                                                                                                                                                                                                                                                                                                                                                                                                                                                                                                                                                                                                                                                                                                                                                                                                                                                                                                                                                                                                                                                                                                                                                                                                                                                                                                                                                                                                                                                                                                                                                                                                                                                                                                                                                                                          |
| response to tumor cell                                          | GO:0002347 | 3.70E-02 | 9.40E-02 | Ceacam1,26365:up Cd24a,12484:down                                                                                                                                                                                                                                                                                                                                                                                                                                                                                                                                                                                                                                                                                                                                                                                                                                                                                                                                                                                                                                                                                                                                                                                                                                                                                                                                                                                                                                                                                                                                                                                                                                                                                                                                                                                                                                                                                                                                                                                                                                                                                                                                                                                                                                                                                                                                                                                                                                                                                                                                                                                        |
| cellular response to prostaglandin stimulus                     | GO:0071379 | 3.70E-02 | 9.40E-02 | Akr1c18,105349:up Ptgir,19222:up                                                                                                                                                                                                                                                                                                                                                                                                                                                                                                                                                                                                                                                                                                                                                                                                                                                                                                                                                                                                                                                                                                                                                                                                                                                                                                                                                                                                                                                                                                                                                                                                                                                                                                                                                                                                                                                                                                                                                                                                                                                                                                                                                                                                                                                                                                                                                                                                                                                                                                                                                                                         |
| positive regulation of hormone metabolic process                | GO:0032352 | 3.70E-02 | 9.40E-02 | Igf2,16002:up Igf1,16000:up                                                                                                                                                                                                                                                                                                                                                                                                                                                                                                                                                                                                                                                                                                                                                                                                                                                                                                                                                                                                                                                                                                                                                                                                                                                                                                                                                                                                                                                                                                                                                                                                                                                                                                                                                                                                                                                                                                                                                                                                                                                                                                                                                                                                                                                                                                                                                                                                                                                                                                                                                                                              |
| cellular anion homeostasis                                      | GO:0030002 | 3.70E-02 | 9.40E-02 | Stc1,20855:up Enpp1,18605:down                                                                                                                                                                                                                                                                                                                                                                                                                                                                                                                                                                                                                                                                                                                                                                                                                                                                                                                                                                                                                                                                                                                                                                                                                                                                                                                                                                                                                                                                                                                                                                                                                                                                                                                                                                                                                                                                                                                                                                                                                                                                                                                                                                                                                                                                                                                                                                                                                                                                                                                                                                                           |
| regulation of bone development                                  | GO:1903010 | 3.70E-02 | 9.40E-02 | Fam101b,76566:down Grem1,23892:up                                                                                                                                                                                                                                                                                                                                                                                                                                                                                                                                                                                                                                                                                                                                                                                                                                                                                                                                                                                                                                                                                                                                                                                                                                                                                                                                                                                                                                                                                                                                                                                                                                                                                                                                                                                                                                                                                                                                                                                                                                                                                                                                                                                                                                                                                                                                                                                                                                                                                                                                                                                        |
| cardiac left ventricle morphogenesis                            | GO:0003214 | 3.70E-02 | 9.40E-02 | Sfrp2,20319:up Tgfb2,21808:down                                                                                                                                                                                                                                                                                                                                                                                                                                                                                                                                                                                                                                                                                                                                                                                                                                                                                                                                                                                                                                                                                                                                                                                                                                                                                                                                                                                                                                                                                                                                                                                                                                                                                                                                                                                                                                                                                                                                                                                                                                                                                                                                                                                                                                                                                                                                                                                                                                                                                                                                                                                          |
| plasminogen activation                                          | GO:0031639 | 3.70E-02 | 9.40E-02 | Serpine2,20720:up Plat,18791:down                                                                                                                                                                                                                                                                                                                                                                                                                                                                                                                                                                                                                                                                                                                                                                                                                                                                                                                                                                                                                                                                                                                                                                                                                                                                                                                                                                                                                                                                                                                                                                                                                                                                                                                                                                                                                                                                                                                                                                                                                                                                                                                                                                                                                                                                                                                                                                                                                                                                                                                                                                                        |
| nitric oxide mediated signal transduction                       | GO:0007263 | 3.70E-02 | 9.40E-02 | Mt2,17750:up Mt1,17748:up                                                                                                                                                                                                                                                                                                                                                                                                                                                                                                                                                                                                                                                                                                                                                                                                                                                                                                                                                                                                                                                                                                                                                                                                                                                                                                                                                                                                                                                                                                                                                                                                                                                                                                                                                                                                                                                                                                                                                                                                                                                                                                                                                                                                                                                                                                                                                                                                                                                                                                                                                                                                |
| regulation of protein kinase C signaling                        | GO:0090036 | 3.70E-02 | 9.40E-02 | Wnt5a,22418:down Vegfa,22339:down                                                                                                                                                                                                                                                                                                                                                                                                                                                                                                                                                                                                                                                                                                                                                                                                                                                                                                                                                                                                                                                                                                                                                                                                                                                                                                                                                                                                                                                                                                                                                                                                                                                                                                                                                                                                                                                                                                                                                                                                                                                                                                                                                                                                                                                                                                                                                                                                                                                                                                                                                                                        |
| serotonin receptor signaling pathway                            | GO:0007210 | 3.70E-02 | 9.40E-02 | Htr2b,15559:down Htr2a,15558:down                                                                                                                                                                                                                                                                                                                                                                                                                                                                                                                                                                                                                                                                                                                                                                                                                                                                                                                                                                                                                                                                                                                                                                                                                                                                                                                                                                                                                                                                                                                                                                                                                                                                                                                                                                                                                                                                                                                                                                                                                                                                                                                                                                                                                                                                                                                                                                                                                                                                                                                                                                                        |
| regulation of granulocyte differentiation                       | GO:0030852 | 3.70E-02 | 9.40E-02 | Ceacam1,26365:up Adipoq,11450:up                                                                                                                                                                                                                                                                                                                                                                                                                                                                                                                                                                                                                                                                                                                                                                                                                                                                                                                                                                                                                                                                                                                                                                                                                                                                                                                                                                                                                                                                                                                                                                                                                                                                                                                                                                                                                                                                                                                                                                                                                                                                                                                                                                                                                                                                                                                                                                                                                                                                                                                                                                                         |
| modulation by host of viral process                             | GO:0044788 | 3.70E-02 | 9.40E-02 | Ceacam1,26365:up Ptx3,19288:up                                                                                                                                                                                                                                                                                                                                                                                                                                                                                                                                                                                                                                                                                                                                                                                                                                                                                                                                                                                                                                                                                                                                                                                                                                                                                                                                                                                                                                                                                                                                                                                                                                                                                                                                                                                                                                                                                                                                                                                                                                                                                                                                                                                                                                                                                                                                                                                                                                                                                                                                                                                           |
| renal vesicle morphogenesis                                     | GO:0072077 | 3.70E-02 | 9.40E-02 | Grem1,23892:up Bmp4,12159:up                                                                                                                                                                                                                                                                                                                                                                                                                                                                                                                                                                                                                                                                                                                                                                                                                                                                                                                                                                                                                                                                                                                                                                                                                                                                                                                                                                                                                                                                                                                                                                                                                                                                                                                                                                                                                                                                                                                                                                                                                                                                                                                                                                                                                                                                                                                                                                                                                                                                                                                                                                                             |

|                                                       |            |          |          |                                                                                                                                                                                                                                                                                                                                                                                                                                                                                                                                                                                                                                                                                                                                                                                                                      |
|-------------------------------------------------------|------------|----------|----------|----------------------------------------------------------------------------------------------------------------------------------------------------------------------------------------------------------------------------------------------------------------------------------------------------------------------------------------------------------------------------------------------------------------------------------------------------------------------------------------------------------------------------------------------------------------------------------------------------------------------------------------------------------------------------------------------------------------------------------------------------------------------------------------------------------------------|
| positive regulation of transmembrane transport        | GO:0034764 | 3.71E-02 | 9.41E-02 | Fxyd1,56188:up Cxcl12,20315:up Ccl12,20293:up Stc1,20855:up S100a1,20193:up Bmp4,12159:up                                                                                                                                                                                                                                                                                                                                                                                                                                                                                                                                                                                                                                                                                                                            |
| Rho protein signal transduction                       | GO:007266  | 3.73E-02 | 9.45E-02 | Col1a2,12843:down Ccl9,20308:up Ccl6,20305:up Wnt5a,22418:down Ccl7,20306:up Ccl2,20296:up Ccl12,20293:up Ccl4,20303:up Ccl3,20302:up Col3a1,12825:down Ccl8,20307:up                                                                                                                                                                                                                                                                                                                                                                                                                                                                                                                                                                                                                                                |
| positive regulation of vasoconstriction               | GO:0045907 | 3.76E-02 | 9.52E-02 | Egfr,13649:down Htr2a,15558:down Ptgs2,19225:down                                                                                                                                                                                                                                                                                                                                                                                                                                                                                                                                                                                                                                                                                                                                                                    |
| cGMP metabolic process                                | GO:0046068 | 3.76E-02 | 9.52E-02 | Htr2b,15559:down Wnt5a,22418:down Vegfa,22339:down                                                                                                                                                                                                                                                                                                                                                                                                                                                                                                                                                                                                                                                                                                                                                                   |
| negative regulation of calcium ion transport          | GO:0051926 | 3.76E-02 | 9.52E-02 | Tgfb2,21808:down Ptgs2,19225:down Stc1,20855:up                                                                                                                                                                                                                                                                                                                                                                                                                                                                                                                                                                                                                                                                                                                                                                      |
| T cell homeostasis                                    | GO:0043029 | 3.76E-02 | 9.52E-02 | Ceacam1,26365:up Cd24a,12484:down Tgfb2,21808:down                                                                                                                                                                                                                                                                                                                                                                                                                                                                                                                                                                                                                                                                                                                                                                   |
| forebrain generation of neurons                       | GO:0021872 | 3.78E-02 | 9.55E-02 | Fgfr1,14182:down Wnt5a,22418:down Inhba,16323:down Fgfr2,14183:up                                                                                                                                                                                                                                                                                                                                                                                                                                                                                                                                                                                                                                                                                                                                                    |
| vasodilation                                          | GO:0042311 | 3.78E-02 | 9.55E-02 | Kng1,16644:up Adm,11535:up Egfr,13649:down Ednrb,13618:up                                                                                                                                                                                                                                                                                                                                                                                                                                                                                                                                                                                                                                                                                                                                                            |
| nephron tubule morphogenesis                          | GO:0072078 | 3.78E-02 | 9.55E-02 | Vegfa,22339:down Npnt,114249:up Grem1,23892:up Bmp4,12159:up                                                                                                                                                                                                                                                                                                                                                                                                                                                                                                                                                                                                                                                                                                                                                         |
| response to retinoic acid                             | GO:0032526 | 3.78E-02 | 9.55E-02 | Pparg,19016:up Ret,19713:up Ptk7,71461:down Aldh1a2,19378:up                                                                                                                                                                                                                                                                                                                                                                                                                                                                                                                                                                                                                                                                                                                                                         |
| carbohydrate transport                                | GO:0008643 | 3.82E-02 | 9.65E-02 | Tnf,21926:up Fabp5,16592:up C3,12266:up Enpp1,18605:down Igf1,16000:up Adipoq,11450:up                                                                                                                                                                                                                                                                                                                                                                                                                                                                                                                                                                                                                                                                                                                               |
| negative regulation of neurogenesis                   | GO:0050768 | 3.92E-02 | 9.88E-02 | Plk2,20620:down Cd24a,12484:down Efemp1,216616:up Wnt5a,22418:down Bmpr1a,12166:down Dpysl3,22240:down Ednrb,13618:up Col3a1,12825:down Bmp4,12159:up                                                                                                                                                                                                                                                                                                                                                                                                                                                                                                                                                                                                                                                                |
| organic substance transport                           | GO:0071702 | 3.93E-02 | 9.91E-02 | Ice1,218333:down Ccl2,20296:up C3,12266:up Mmp13,17386:up Slc29a1,63959:up Ankrd1,107765:down Gpm6b,14758:up Clec4n,56620:up Postn,50706:down Akr1c18,105349:up Cd24a,12484:down Fabp5,16592:up Wnt5a,22418:down Bmpr1a,12166:down Il1rn,16181:up Maob,109731:up Adipoq,11450:up Bmp4,12159:up Igf1,16000:up Tgfb2,21808:down Il1rl1,17082:down Clec4e,56619:up Htr2b,15559:down Inhba,16323:down Ccl3,20302:up Fam132b,227358:down Cxcl12,20315:up Htr2a,15558:down Slc16a4,229699:down Kdelr3,105785:down Pparg,19016:up Gas6,14456:up Tnf,21926:up Fxyd1,56188:up Glp1r,14652:down Egfr,13649:down Sec23a,20334:down Lpl,16956:up Sfrp1,20377:up C1qtnf3,81799:down Ptgs2,19225:down Tfrc,22042:up Snca,20618:up Grem1,23892:up Serinc2,230779:down Ceacam1,26365:up Sfrp2,20319:up Emb,13723:up Enpp1,18605:down |
| secretion by tissue                                   | GO:0032941 | 3.96E-02 | 9.97E-02 | Vdr,22337:down Vegfa,22339:down Mmp13,17386:up Cdo1,12583:up                                                                                                                                                                                                                                                                                                                                                                                                                                                                                                                                                                                                                                                                                                                                                         |
| lymphocyte activation                                 | GO:0046649 | 3.99E-02 | 1.00E-01 | Ly9,17085:up Ccl2,20296:up Ctla2a,13024:down Lyl1,17095:up Cxcl12,20315:up Igf2,16002:up Gas6,14456:up Cd24a,12484:down Sfrp1,20377:up Cd4,12504:up Tfrc,22042:up Bmp4,12159:up Igf1,16000:up Ceacam1,26365:up Tnfsf9,21950:up Clec4e,56619:up                                                                                                                                                                                                                                                                                                                                                                                                                                                                                                                                                                       |
| regulation of immunoglobulin mediated immune response | GO:0002889 | 4.00E-02 | 1.00E-01 | Tnf,21926:up C3,12266:up Tfrc,22042:up                                                                                                                                                                                                                                                                                                                                                                                                                                                                                                                                                                                                                                                                                                                                                                               |
| negative regulation of carbohydrate metabolic process | GO:0045912 | 4.00E-02 | 1.00E-01 | C1qtnf3,81799:down Enpp1,18605:down Adipoq,11450:up                                                                                                                                                                                                                                                                                                                                                                                                                                                                                                                                                                                                                                                                                                                                                                  |
| regulation of cell-substrate junction assembly        | GO:0090109 | 4.00E-02 | 1.00E-01 | Gpm6b,14758:up Vegfa,22339:down Grem1,23892:up                                                                                                                                                                                                                                                                                                                                                                                                                                                                                                                                                                                                                                                                                                                                                                       |
| negative regulation of muscle cell apoptotic process  | GO:0010656 | 4.00E-02 | 1.00E-01 | Sfrp2,20319:up Hmox1,15368:up Igf1,16000:up                                                                                                                                                                                                                                                                                                                                                                                                                                                                                                                                                                                                                                                                                                                                                                          |
| cellular extravasation                                | GO:0045123 | 4.00E-02 | 1.00E-01 | Tnf,21926:up Cxcl12,20315:up Ccl2,20296:up                                                                                                                                                                                                                                                                                                                                                                                                                                                                                                                                                                                                                                                                                                                                                                           |
| regulation of focal adhesion assembly                 | GO:0051893 | 4.00E-02 | 1.00E-01 | Gpm6b,14758:up Vegfa,22339:down Grem1,23892:up                                                                                                                                                                                                                                                                                                                                                                                                                                                                                                                                                                                                                                                                                                                                                                       |
| regulation of B cell mediated immunity                | GO:0002712 | 4.00E-02 | 1.00E-01 | Tnf,21926:up C3,12266:up Tfrc,22042:up                                                                                                                                                                                                                                                                                                                                                                                                                                                                                                                                                                                                                                                                                                                                                                               |
| regulation of endopeptidase activity                  | GO:0052548 | 4.00E-02 | 1.01E-01 | Tnf,21926:up Pparg,19016:up Gas6,14456:up Slpi,20568:up Igf1,16000:up Sfrp2,20319:up Vegfa,22339:down F3,14066:up                                                                                                                                                                                                                                                                                                                                                                                                                                                                                                                                                                                                                                                                                                    |
| regulation of nuclear division                        | GO:0051783 | 4.06E-02 | 1.02E-01 | Tnf,21926:up Wnt5a,22418:down Igf2,16002:up Fgfr2,14183:up Igf1,16000:up Bmp4,12159:up                                                                                                                                                                                                                                                                                                                                                                                                                                                                                                                                                                                                                                                                                                                               |
| Rac protein signal transduction                       | GO:0016601 | 4.08E-02 | 1.02E-01 | Ccl9,20308:up Ccl6,20305:up Wnt5a,22418:down Ccl7,20306:up Ccl2,20296:up Ccl12,20293:up Ccl4,20303:up Ccl3,20302:up Ccl8,20307:up                                                                                                                                                                                                                                                                                                                                                                                                                                                                                                                                                                                                                                                                                    |
| axon guidance                                         | GO:0007411 | 4.10E-02 | 1.02E-01 | Flrt2,399558:down Lama2,16773:down Plxnd1,67784:up Cxcl12,20315:up Wnt5a,22418:down Vegfa,22339:down Tgfb2,21808:down                                                                                                                                                                                                                                                                                                                                                                                                                                                                                                                                                                                                                                                                                                |
| neuron projection guidance                            | GO:0097485 | 4.10E-02 | 1.02E-01 | Flrt2,399558:down Lama2,16773:down Plxnd1,67784:up Cxcl12,20315:up Wnt5a,22418:down Vegfa,22339:down Tgfb2,21808:down                                                                                                                                                                                                                                                                                                                                                                                                                                                                                                                                                                                                                                                                                                |
| endocardial cushion formation                         | GO:0003272 | 4.12E-02 | 1.02E-01 | Tgfb2,21808:down Bmpr1a,12166:down                                                                                                                                                                                                                                                                                                                                                                                                                                                                                                                                                                                                                                                                                                                                                                                   |
| hair cycle phase                                      | GO:0044851 | 4.12E-02 | 1.02E-01 | Tgfb2,21808:down Ptgs2,19225:down                                                                                                                                                                                                                                                                                                                                                                                                                                                                                                                                                                                                                                                                                                                                                                                    |
| cell aggregation                                      | GO:0098743 | 4.12E-02 | 1.02E-01 | Col11a1,12814:down Tgfb2,21808:down                                                                                                                                                                                                                                                                                                                                                                                                                                                                                                                                                                                                                                                                                                                                                                                  |
| phasic smooth muscle contraction                      | GO:0014821 | 4.12E-02 | 1.02E-01 | Htr2b,15559:down Ednrb,13618:up                                                                                                                                                                                                                                                                                                                                                                                                                                                                                                                                                                                                                                                                                                                                                                                      |
| cartilage condensation                                | GO:0001502 | 4.12E-02 | 1.02E-01 | Col11a1,12814:down Tgfb2,21808:down                                                                                                                                                                                                                                                                                                                                                                                                                                                                                                                                                                                                                                                                                                                                                                                  |
| serotonin transport                                   | GO:0006837 | 4.12E-02 | 1.02E-01 | Gpm6b,14758:up Maob,109731:up                                                                                                                                                                                                                                                                                                                                                                                                                                                                                                                                                                                                                                                                                                                                                                                        |

|                                                                                           |            |          |          |                                                                                                                                                                                                                                                                                                                                                                                                                                                                                                            |
|-------------------------------------------------------------------------------------------|------------|----------|----------|------------------------------------------------------------------------------------------------------------------------------------------------------------------------------------------------------------------------------------------------------------------------------------------------------------------------------------------------------------------------------------------------------------------------------------------------------------------------------------------------------------|
| vitamin biosynthetic process                                                              | GO:0009110 | 4.12E-02 | 1.02E-01 | Vdr,22337:down Tnf,21926:up                                                                                                                                                                                                                                                                                                                                                                                                                                                                                |
| response to monoamine                                                                     | GO:0071867 | 4.12E-02 | 1.02E-01 | Htr2b,15559:down Adipoq,11450:up                                                                                                                                                                                                                                                                                                                                                                                                                                                                           |
| renal vesicle development                                                                 | GO:0072087 | 4.12E-02 | 1.02E-01 | Grem1,23892:up Bmp4,12159:up                                                                                                                                                                                                                                                                                                                                                                                                                                                                               |
| fibroblast apoptotic process                                                              | GO:0044346 | 4.12E-02 | 1.02E-01 | Gas6,14456:up Sfrp1,20377:up                                                                                                                                                                                                                                                                                                                                                                                                                                                                               |
| negative regulation of epidermis development                                              | GO:0045683 | 4.12E-02 | 1.02E-01 | Tgfb2,21808:down Inhba,16323:down                                                                                                                                                                                                                                                                                                                                                                                                                                                                          |
| subpallium development                                                                    | GO:0021544 | 4.12E-02 | 1.02E-01 | Inhba,16323:down Aldh1a3,56847:down                                                                                                                                                                                                                                                                                                                                                                                                                                                                        |
| regulation of platelet aggregation                                                        | GO:0090330 | 4.12E-02 | 1.02E-01 | Ceacam1,26365:up Serpine2,20720:up                                                                                                                                                                                                                                                                                                                                                                                                                                                                         |
| regulation of receptor biosynthetic process                                               | GO:0010869 | 4.12E-02 | 1.02E-01 | Pparg,19016:up Adipoq,11450:up                                                                                                                                                                                                                                                                                                                                                                                                                                                                             |
| dorsal/ventral axis specification                                                         | GO:0009950 | 4.12E-02 | 1.02E-01 | Sfrp1,20377:up Bmpr1a,12166:down                                                                                                                                                                                                                                                                                                                                                                                                                                                                           |
| negative regulation of cysteine-type endopeptidase activity involved in apoptotic process | GO:0043154 | 4.13E-02 | 1.03E-01 | Gas6,14456:up Sfrp2,20319:up Vegfa,22339:down Igf1,16000:up                                                                                                                                                                                                                                                                                                                                                                                                                                                |
| nephron epithelium morphogenesis                                                          | GO:0072088 | 4.13E-02 | 1.03E-01 | Vegfa,22339:down Npnt,114249:up Grem1,23892:up Bmp4,12159:up                                                                                                                                                                                                                                                                                                                                                                                                                                               |
| negative regulation of angiogenesis                                                       | GO:0016525 | 4.13E-02 | 1.03E-01 | Sulf1,240725:down Ccl2,20296:up Cx3cr1,13051:down Thbs2,21826:down                                                                                                                                                                                                                                                                                                                                                                                                                                         |
| somitogenesis                                                                             | GO:0001756 | 4.13E-02 | 1.03E-01 | Sfrp2,20319:up Sfrp1,20377:up Wnt5a,22418:down Bmpr1a,12166:down                                                                                                                                                                                                                                                                                                                                                                                                                                           |
| glucose import                                                                            | GO:0046323 | 4.13E-02 | 1.03E-01 | Tnf,21926:up Enpp1,18605:down Igf1,16000:up Adipoq,11450:up                                                                                                                                                                                                                                                                                                                                                                                                                                                |
| modification of morphology or physiology of other organism                                | GO:0035821 | 4.13E-02 | 1.03E-01 | Ceacam1,26365:up Ptx3,19288:up Cd4,12504:up Ccl4,20303:up                                                                                                                                                                                                                                                                                                                                                                                                                                                  |
| lymphocyte homeostasis                                                                    | GO:0002260 | 4.13E-02 | 1.03E-01 | Ceacam1,26365:up Cd24a,12484:down Tgfb2,21808:down Slc40a1,53945:up                                                                                                                                                                                                                                                                                                                                                                                                                                        |
| lymphocyte differentiation                                                                | GO:0030098 | 4.16E-02 | 1.03E-01 | Gas6,14456:up Cd24a,12484:down Ly9,17085:up Sfrp1,20377:up Cd4,12504:up Bmp4,12159:up Ctla2a,13024:down Lyl1,17095:up Tnfsf9,21950:up Clec4e,56619:up                                                                                                                                                                                                                                                                                                                                                      |
| positive regulation of nucleotide metabolic process                                       | GO:0045981 | 4.18E-02 | 1.04E-01 | Adm,11535:up Wnt5a,22418:down Htr2a,15558:down Ptgir,19222:up Igf1,16000:up                                                                                                                                                                                                                                                                                                                                                                                                                                |
| positive regulation of purine nucleotide metabolic process                                | GO:1900544 | 4.18E-02 | 1.04E-01 | Adm,11535:up Wnt5a,22418:down Htr2a,15558:down Ptgir,19222:up Igf1,16000:up                                                                                                                                                                                                                                                                                                                                                                                                                                |
| glycosaminoglycan biosynthetic process                                                    | GO:0006024 | 4.24E-02 | 1.05E-01 | Chst11,58250:down Has2,15117:down Igf1,16000:up                                                                                                                                                                                                                                                                                                                                                                                                                                                            |
| positive regulation of mitotic nuclear division                                           | GO:0045840 | 4.24E-02 | 1.05E-01 | Tnf,21926:up Igf2,16002:up Igf1,16000:up                                                                                                                                                                                                                                                                                                                                                                                                                                                                   |
| viral entry into host cell                                                                | GO:0046718 | 4.24E-02 | 1.05E-01 | Ceacam1,26365:up Gas6,14456:up Ptx3,19288:up                                                                                                                                                                                                                                                                                                                                                                                                                                                               |
| response to fatty acid                                                                    | GO:0070542 | 4.24E-02 | 1.05E-01 | Akr1c18,105349:up Tgfb3,21814:up Ptgir,19222:up                                                                                                                                                                                                                                                                                                                                                                                                                                                            |
| inflammatory response to antigenic stimulus                                               | GO:0002437 | 4.24E-02 | 1.05E-01 | Tnf,21926:up Cd24a,12484:down C3,12266:up                                                                                                                                                                                                                                                                                                                                                                                                                                                                  |
| ion transmembrane transport                                                               | GO:0034220 | 4.27E-02 | 1.06E-01 | Htr2b,15559:down Cxcl12,20515:up Htr2a,15558:down Slc10a4,229099:down Slc40a1,53945:up Gas6,14456:up Fxyd1,56188:up Hvcn1,74096:up Glp1r,14652:down Ccl12,20293:up Stc1,20855:up Fxyd2,11936:up Kcnj15,16516:down Bmp4,12159:up Ank,11732:down Tgfb2,21808:down Emb,13723:up Sl00a1,20193:up                                                                                                                                                                                                               |
| nephron morphogenesis                                                                     | GO:0072028 | 4.31E-02 | 1.06E-01 | Vegfa,22339:down Npnt,114249:up Grem1,23892:up Bmp4,12159:up                                                                                                                                                                                                                                                                                                                                                                                                                                               |
| positive regulation of carbohydrate metabolic process                                     | GO:0045913 | 4.31E-02 | 1.06E-01 | Has2,15117:down Htr2a,15558:down Igf2,16002:up Igf1,16000:up                                                                                                                                                                                                                                                                                                                                                                                                                                               |
| negative regulation of cysteine-type endopeptidase activity                               | GO:2000117 | 4.31E-02 | 1.06E-01 | Gas6,14456:up Sfrp2,20319:up Vegfa,22339:down Igf1,16000:up                                                                                                                                                                                                                                                                                                                                                                                                                                                |
| negative regulation of biosynthetic process                                               | GO:0009890 | 4.33E-02 | 1.07E-01 | Sfrp4,20379:up Ednrb,13618:up Epas1,13819:up Ankrd1,107765:down Vdr,22337:down Fabp4,11770:up Vegfa,22339:down Gas6,14456:up Pparg,19016:up Tnf,21926:up Loxl2,94352:down Loxl3,16950:down Akr1c18,105349:up Lmcd1,30937:up Fgfr1,14182:down Egfr,13649:down Hmox1,15368:up Sfrp1,20377:up C1qtnf3,81799:down Wnt5a,22418:down Ccl4,20303:up Grem1,23892:up Adipoq,11450:up Bmp4,12159:up Ceacam1,26365:up Sfrp2,20319:up Prg4,96875:down Errf1,74155:down Enpp1,18605:down Fgfr2,14183:up Sl00a1,20193:up |
| negative regulation of gene expression                                                    | GO:0010629 | 4.37E-02 | 1.08E-01 | Sfrp4,20379:up Ednrb,13618:up Epas1,13819:up Ankrd1,107765:down Vdr,22337:down Ctla2a,13024:down Fabp4,11770:up Vegfa,22339:down Serpine2,20720:up Tnf,21926:up Gas6,14456:up Pparg,19016:up Loxl2,94352:down Loxl3,16950:down Lmcd1,30937:up Fgfr1,14182:down Egfr,13649:down Hmox1,15368:up Sfrp1,20377:up Wnt5a,22418:down Tgfb3,21814:up Grem1,23892:up Ccl4,20303:up Adipoq,11450:up Bmp4,12159:up Igf1,16000:up Sfrp2,20319:up Serpine1,12258:up Tgfb2,21808:down Fgfr2,14183:up Sl00a1,20193:up     |
| positive regulation of JNK cascade                                                        | GO:0046330 | 4.47E-02 | 1.10E-01 | Ceacam1,26365:up Tnf,21926:up Trf,22041:up Wnt5a,22418:down Il1rn,16181:up                                                                                                                                                                                                                                                                                                                                                                                                                                 |

|                                                                                            |            |          |          |                                                                                                                                                                                                                                                                                                                                                                                                                                                                      |
|--------------------------------------------------------------------------------------------|------------|----------|----------|----------------------------------------------------------------------------------------------------------------------------------------------------------------------------------------------------------------------------------------------------------------------------------------------------------------------------------------------------------------------------------------------------------------------------------------------------------------------|
| regulation of gliogenesis                                                                  | GO:0014013 | 4.47E-02 | 1.10E-01 | Pparg,19016:up Trf,22041:up Efemp1,216616:up Serpine2,20720:up Bmp4,12159:up                                                                                                                                                                                                                                                                                                                                                                                         |
| response to toxic substance                                                                | GO:0009636 | 4.47E-02 | 1.10E-01 | Tnf,21926:up Alpl,11647:up Ccl4,20303:up Mt2,17750:up Mt1,17748:up                                                                                                                                                                                                                                                                                                                                                                                                   |
| positive regulation of glucose transport                                                   | GO:0010828 | 4.49E-02 | 1.10E-01 | C3,12266:up lgf1,16000:up Adipoq,11450:up                                                                                                                                                                                                                                                                                                                                                                                                                            |
| negative regulation of chemotaxis                                                          | GO:0050922 | 4.49E-02 | 1.10E-01 | Wnt5a,22418:down Ccl12,20293:up Grem1,23892:up                                                                                                                                                                                                                                                                                                                                                                                                                       |
| regulation of adherens junction organization                                               | GO:1903391 | 4.49E-02 | 1.10E-01 | Gpm6b,14758:up Vegfa,22339:down Grem1,23892:up                                                                                                                                                                                                                                                                                                                                                                                                                       |
| regulation of sensory perception of pain                                                   | GO:0051930 | 4.49E-02 | 1.10E-01 | Fgfr1,14182:down Ncam1,17967:down Ednrb,13618:up                                                                                                                                                                                                                                                                                                                                                                                                                     |
| regulation of sensory perception                                                           | GO:0051931 | 4.49E-02 | 1.10E-01 | Fgfr1,14182:down Ncam1,17967:down Ednrb,13618:up                                                                                                                                                                                                                                                                                                                                                                                                                     |
| regulation of phosphatidylinositol 3-kinase signaling                                      | GO:0014066 | 4.49E-02 | 1.10E-01 | Tgfb2,21808:down Pdgfc,54635:down Serpine2,20720:up lgf1,16000:up                                                                                                                                                                                                                                                                                                                                                                                                    |
| positive regulation of lymphocyte mediated immunity                                        | GO:0002708 | 4.49E-02 | 1.10E-01 | Tnf,21926:up Cd24a,12484:down C3,12266:up Tfrc,22042:up                                                                                                                                                                                                                                                                                                                                                                                                              |
| cell morphogenesis                                                                         | GO:000902  | 4.54E-02 | 1.11E-01 | Fam101b,76566:down Flrt2,399558:down Lama2,16773:down Plxnd1,67784:up Ccl2,20296:up Ccl3,20302:up Sema7a,20361:down Tnfrsf12a,27279:down Vdr,22337:down Cxcl12,20315:up Postn,50706:down Vegfa,22339:down Loxl2,94352:down Loxl3,16950:down Egfr,13649:down Sfrp1,20377:up Has2,15117:down Wnt5a,22418:down Ccl12,20293:up Tgfb2,21808:down Stc1,20855:up Grem1,23892:up Bmp4,12159:up Sfrp2,20319:up Crabp2,12904:down Ret,19713:up Tgfb2,21808:down Fgfr2,14183:up |
| negative regulation of glucose import                                                      | GO:0046325 | 4.55E-02 | 1.11E-01 | Tnf,21926:up Enpp1,18605:down                                                                                                                                                                                                                                                                                                                                                                                                                                        |
| regulation of androgen receptor signaling pathway                                          | GO:0060765 | 4.55E-02 | 1.11E-01 | Sfrp1,20377:up lgf1,16000:up                                                                                                                                                                                                                                                                                                                                                                                                                                         |
| vascular smooth muscle contraction                                                         | GO:0014829 | 4.55E-02 | 1.11E-01 | Htr2a,15558:down Ednrb,13618:up                                                                                                                                                                                                                                                                                                                                                                                                                                      |
| cardiac right ventricle morphogenesis                                                      | GO:0003215 | 4.55E-02 | 1.11E-01 | Tgfb2,21808:down Bmpr1a,12166:down                                                                                                                                                                                                                                                                                                                                                                                                                                   |
| regulation of dopamine metabolic process                                                   | GO:0042053 | 4.55E-02 | 1.11E-01 | Maob,109731:up Epas1,13819:up                                                                                                                                                                                                                                                                                                                                                                                                                                        |
| positive regulation of transcription from RNA polymerase II promoter in response to stress | GO:0036003 | 4.55E-02 | 1.11E-01 | Vegfa,22339:down Creb3l1,26427:down                                                                                                                                                                                                                                                                                                                                                                                                                                  |
| regulation of interleukin-1 beta secretion                                                 | GO:0050706 | 4.55E-02 | 1.11E-01 | Wnt5a,22418:down Ccl3,20302:up                                                                                                                                                                                                                                                                                                                                                                                                                                       |
| cellular response to estradiol stimulus                                                    | GO:0071392 | 4.55E-02 | 1.11E-01 | Egfr,13649:down Mmp2,17390:down                                                                                                                                                                                                                                                                                                                                                                                                                                      |
| positive regulation of pri-miRNA transcription from RNA polymerase II promoter             | GO:1902895 | 4.55E-02 | 1.11E-01 | Bmpr1a,12166:down Bmp4,12159:up                                                                                                                                                                                                                                                                                                                                                                                                                                      |
| glomerular filtration                                                                      | GO:0003094 | 4.55E-02 | 1.11E-01 | Gas6,14456:up Sulf1,240725:down                                                                                                                                                                                                                                                                                                                                                                                                                                      |
| positive regulation of alpha-beta T cell proliferation                                     | GO:0046641 | 4.55E-02 | 1.11E-01 | Ceacam1,26365:up Cd24a,12484:down                                                                                                                                                                                                                                                                                                                                                                                                                                    |
| positive regulation of lipid storage                                                       | GO:0010884 | 4.55E-02 | 1.11E-01 | Lpl,16956:up C3,12266:up                                                                                                                                                                                                                                                                                                                                                                                                                                             |
| regulation of neuron apoptotic process                                                     | GO:0043523 | 4.59E-02 | 1.12E-01 | Tnf,21926:up Glp1r,14652:down Hmox1,15368:up Ccl12,20293:up Ccl3,20302:up Crlf1,12931:down Tgfb2,21808:down Mt1,17748:up                                                                                                                                                                                                                                                                                                                                             |
| positive regulation of immune response                                                     | GO:0050778 | 4.61E-02 | 1.13E-01 | Tnf,21926:up Cd24a,12484:down Wnt5a,22418:down Cd4,12504:up C3,12266:up C1rb,667277:up Tfrc,22042:up Sema7a,20361:down Serpig1,12258:up C1s1,50908:up C1s2,317677:up Mmp2,17390:down                                                                                                                                                                                                                                                                                 |
| tissue homeostasis                                                                         | GO:0001894 | 4.65E-02 | 1.13E-01 | Ceacam1,26365:up Trf,22041:up Egfr,13649:down Vegfa,22339:down Tfrc,22042:up Tnfrsf11b,18383:up Epas1,13819:up                                                                                                                                                                                                                                                                                                                                                       |
| regulation of cysteine-type endopeptidase activity                                         | GO:2000116 | 4.65E-02 | 1.13E-01 | Tnf,21926:up Pparg,19016:up Gas6,14456:up Sfrp2,20319:up Vegfa,22339:down F3,14066:up lgf1,16000:up                                                                                                                                                                                                                                                                                                                                                                  |
| regulation of Rho protein signal transduction                                              | GO:0035023 | 4.65E-02 | 1.13E-01 | Ccl9,20308:up Ccl6,20305:up Wnt5a,22418:down Ccl7,20306:up Ccl2,20296:up Ccl12,20293:up Ccl4,20303:up Ccl3,20302:up Col3a1,12825:down Ccl8,20307:up                                                                                                                                                                                                                                                                                                                  |
| positive regulation of transcription from RNA polymerase II promoter                       | GO:0045944 | 4.66E-02 | 1.14E-01 | Fstl3,83554:down Pri2c2,18811:up Inhba,16323:down Ccl3,20302:up Epas1,13819:up Vdr,22337:down Sdpr,20324:down Vegfa,22339:down lgf2,16002:up Slc40a1,53945:up Pparg,19016:up Tnf,21926:up Glp1r,14652:down Egfr,13649:down Fgfr1,14182:down Wnt5a,22418:down Bmpr1a,12166:down Grem1,23892:up Bmp4,12159:up lgf1,16000:up Sfrp2,20319:up Npnt,114249:up Creb3l1,26427:down Fgfr2,14183:up                                                                            |
| eye morphogenesis                                                                          | GO:0048592 | 4.68E-02 | 1.14E-01 | Col5a2,12832:down Col5a1,12831:down Vegfa,22339:down Aldh1a3,56847:down Col8a1,12837:down Bmp4,12159:up                                                                                                                                                                                                                                                                                                                                                              |
| body fluid secretion                                                                       | GO:0007589 | 4.68E-02 | 1.14E-01 | Vdr,22337:down Vegfa,22339:down Mmp13,17386:up Cdo1,12583:up                                                                                                                                                                                                                                                                                                                                                                                                         |



|                                                                |            |          |          |                                                                                                                                                                                                                                                                                                                                                                                                                                                                                                                                                                                                |
|----------------------------------------------------------------|------------|----------|----------|------------------------------------------------------------------------------------------------------------------------------------------------------------------------------------------------------------------------------------------------------------------------------------------------------------------------------------------------------------------------------------------------------------------------------------------------------------------------------------------------------------------------------------------------------------------------------------------------|
| negative regulation of blood vessel morphogenesis              | GO:2000181 | 4.68E-02 | 1.14E-01 | Sulf1,240725:down Ccl2,20296:up Cx3cr1,13051:down Thbs2,21826:down                                                                                                                                                                                                                                                                                                                                                                                                                                                                                                                             |
| renal tubule morphogenesis                                     | GO:0061333 | 4.68E-02 | 1.14E-01 | Vegfa,22339:down Npnt,114249:up Grem1,23892:up Bmp4,12159:up                                                                                                                                                                                                                                                                                                                                                                                                                                                                                                                                   |
| anion homeostasis                                              | GO:0055081 | 4.75E-02 | 1.15E-01 | Sfrp4,20379:up Stc1,20855:up Enpp1,18605:down                                                                                                                                                                                                                                                                                                                                                                                                                                                                                                                                                  |
| excretion                                                      | GO:0007588 | 4.75E-02 | 1.15E-01 | Stc1,20855:up Ednrb,13618:up Anpep,16790:up                                                                                                                                                                                                                                                                                                                                                                                                                                                                                                                                                    |
| neuron projection regeneration                                 | GO:0031102 | 4.75E-02 | 1.15E-01 | Adm,11535:up Tnc,21923:down Mmp2,17390:down                                                                                                                                                                                                                                                                                                                                                                                                                                                                                                                                                    |
| negative regulation of cytokine secretion                      | GO:0050710 | 4.75E-02 | 1.15E-01 | Tnf,21926:up Gas6,14456:up C1qtnf3,81799:down                                                                                                                                                                                                                                                                                                                                                                                                                                                                                                                                                  |
| regulation of catecholamine secretion                          | GO:0050433 | 4.75E-02 | 1.15E-01 | Cxcl12,20315:up Htr2a,15558:down Sncg,20618:up                                                                                                                                                                                                                                                                                                                                                                                                                                                                                                                                                 |
| symbiosis, encompassing mutualism through parasitism           | GO:0044403 | 4.76E-02 | 1.15E-01 | Tnf,21926:up Gas6,14456:up Lmcd1,30937:up Ptx3,19288:up Cd4,12504:up Slpi,20568:up Ccl4,20303:up Ifit3,15959:up Ceacam1,26365:up Cxcl9,17329:up Oasl1,231655:up Ifit1,15957:up Lrrc15,74488:down Oas3,246727:up                                                                                                                                                                                                                                                                                                                                                                                |
| interspecies interaction between organisms                     | GO:0044419 | 4.76E-02 | 1.15E-01 | Tnf,21926:up Gas6,14456:up Lmcd1,30937:up Ptx3,19288:up Cd4,12504:up Slpi,20568:up Ccl4,20303:up Ifit3,15959:up Ceacam1,26365:up Cxcl9,17329:up Oasl1,231655:up Ifit1,15957:up Lrrc15,74488:down Oas3,246727:up                                                                                                                                                                                                                                                                                                                                                                                |
| interaction with host                                          | GO:0051701 | 4.88E-02 | 1.18E-01 | Ceacam1,26365:up Gas6,14456:up Ptx3,19288:up Cd4,12504:up                                                                                                                                                                                                                                                                                                                                                                                                                                                                                                                                      |
| detection of stimulus involved in sensory perception           | GO:0050906 | 4.93E-02 | 1.20E-01 | Tnf,21926:up Col11a1,12814:down Htr2a,15558:down Serpine2,20720:up Igf1,16000:up                                                                                                                                                                                                                                                                                                                                                                                                                                                                                                               |
| protein transport                                              | GO:0015031 | 4.94E-02 | 1.20E-01 | Ice1,218333:down Ccl2,20296:up Mmp13,17386:up Ankrd1,107765:down Gpm6b,14758:up Clec4n,56620:up Postn,50706:down Akr1c18,105349:up Cd24a,12484:down Wnt5a,22418:down Bmpr1a,12166:down Il1rn,16181:up Adipoq,11450:up Bmp4,12159:up Igf1,16000:up Tgfb2,21808:down Il1rl1,17082:down Clec4e,56619:up Htr2b,15559:down Ccl3,20302:up Kdelr3,105785:down Tnf,21926:up Pparg,19016:up Gas6,14456:up Glp1r,14652:down Egfr,13649:down Sfrp1,20377:up Lpl,16956:up Sec23a,20334:down C1qtnf3,81799:down Tfrc,22042:up Ptgs2,19225:down Sncg,20618:up Grem1,23892:up Ceacam1,26365:up Sfrp2,20319:up |
| cellular response to type I interferon                         | GO:0071357 | 5.00E-02 | 1.20E-01 | Wnt5a,22418:down Ifit1,15957:up                                                                                                                                                                                                                                                                                                                                                                                                                                                                                                                                                                |
| chondroitin sulfate metabolic process                          | GO:0030204 | 5.00E-02 | 1.20E-01 | Mamdc2,71738:down Chst11,58250:down                                                                                                                                                                                                                                                                                                                                                                                                                                                                                                                                                            |
| regulation of catecholamine metabolic process                  | GO:0042069 | 5.00E-02 | 1.20E-01 | Maob,109731:up Epas1,13819:up                                                                                                                                                                                                                                                                                                                                                                                                                                                                                                                                                                  |
| leukocyte tethering or rolling                                 | GO:0050901 | 5.00E-02 | 1.20E-01 | Tnf,21926:up Cxcl12,20315:up                                                                                                                                                                                                                                                                                                                                                                                                                                                                                                                                                                   |
| regulation of protein import into nucleus, translocation       | GO:0033158 | 5.00E-02 | 1.20E-01 | Gas6,14456:up Igf1,16000:up                                                                                                                                                                                                                                                                                                                                                                                                                                                                                                                                                                    |
| metanephric nephron morphogenesis                              | GO:0072273 | 5.00E-02 | 1.20E-01 | Grem1,23892:up Bmp4,12159:up                                                                                                                                                                                                                                                                                                                                                                                                                                                                                                                                                                   |
| hair follicle maturation                                       | GO:0048820 | 5.00E-02 | 1.20E-01 | Tgfb2,21808:down Ptgs2,19225:down                                                                                                                                                                                                                                                                                                                                                                                                                                                                                                                                                              |
| atrioventricular valve morphogenesis                           | GO:0003181 | 5.00E-02 | 1.20E-01 | Tgfb2,21808:down Bmpr1a,12166:down                                                                                                                                                                                                                                                                                                                                                                                                                                                                                                                                                             |
| renal sodium excretion                                         | GO:0035812 | 5.00E-02 | 1.20E-01 | Ednrb,13618:up Anpep,16790:up                                                                                                                                                                                                                                                                                                                                                                                                                                                                                                                                                                  |
| renal filtration                                               | GO:0097205 | 5.00E-02 | 1.20E-01 | Gas6,14456:up Sulf1,240725:down                                                                                                                                                                                                                                                                                                                                                                                                                                                                                                                                                                |
| regulation of renal sodium excretion                           | GO:0035813 | 5.00E-02 | 1.20E-01 | Ednrb,13618:up Anpep,16790:up                                                                                                                                                                                                                                                                                                                                                                                                                                                                                                                                                                  |
| morphogenesis of an endothelium                                | GO:0003159 | 5.00E-02 | 1.20E-01 | Adams12,239337:down Bmp4,12159:up                                                                                                                                                                                                                                                                                                                                                                                                                                                                                                                                                              |
| regulation of tumor necrosis factor-mediated signaling pathway | GO:0010803 | 5.00E-02 | 1.20E-01 | Gas6,14456:up Adipoq,11450:up                                                                                                                                                                                                                                                                                                                                                                                                                                                                                                                                                                  |
| pattern specification process                                  | GO:0007389 | 5.00E-02 | 1.20E-01 | Fgfr1,14182:down Plxnd1,67784:up Sfrp1,20377:up Wnt5a,22418:down Bmpr1a,12166:down Aldh1a2,19378:up Stc1,20855:up Grem1,23892:up Bmp4,12159:up Sfrp2,20319:up Cxcl12,20315:up Vegfa,22339:down Fgfr2,14183:up                                                                                                                                                                                                                                                                                                                                                                                  |
| entry into host                                                | GO:0044409 | 5.02E-02 | 1.20E-01 | Ceacam1,26365:up Gas6,14456:up Ptx3,19288:up                                                                                                                                                                                                                                                                                                                                                                                                                                                                                                                                                   |
| negative regulation of tumor necrosis factor production        | GO:0032720 | 5.02E-02 | 1.20E-01 | Gas6,14456:up Errfi1,74155:down Adipoq,11450:up                                                                                                                                                                                                                                                                                                                                                                                                                                                                                                                                                |
| entry into host cell                                           | GO:0030260 | 5.02E-02 | 1.20E-01 | Ceacam1,26365:up Gas6,14456:up Ptx3,19288:up                                                                                                                                                                                                                                                                                                                                                                                                                                                                                                                                                   |
| entry into other organism involved in symbiotic interaction    | GO:0051828 | 5.02E-02 | 1.20E-01 | Ceacam1,26365:up Gas6,14456:up Ptx3,19288:up                                                                                                                                                                                                                                                                                                                                                                                                                                                                                                                                                   |

|                                                                              |            |          |          |                                                                                                                                                                                                                                                                                                                                                                                                                                                                                                                                                                                                                                                                                                                                                                             |
|------------------------------------------------------------------------------|------------|----------|----------|-----------------------------------------------------------------------------------------------------------------------------------------------------------------------------------------------------------------------------------------------------------------------------------------------------------------------------------------------------------------------------------------------------------------------------------------------------------------------------------------------------------------------------------------------------------------------------------------------------------------------------------------------------------------------------------------------------------------------------------------------------------------------------|
| movement in environment of other organism involved in symbiotic interaction  | GO:0052192 | 5.02E-02 | 1.20E-01 | Ceacam1,26365:up Gas6,14456:up Ptx3,19288:up                                                                                                                                                                                                                                                                                                                                                                                                                                                                                                                                                                                                                                                                                                                                |
| movement in host environment                                                 | GO:0052126 | 5.02E-02 | 1.20E-01 | Ceacam1,26365:up Gas6,14456:up Ptx3,19288:up                                                                                                                                                                                                                                                                                                                                                                                                                                                                                                                                                                                                                                                                                                                                |
| regulation of protein tyrosine kinase activity                               | GO:0061097 | 5.02E-02 | 1.20E-01 | Gas6,14456:up Errfi1,74155:down Grem1,23892:up                                                                                                                                                                                                                                                                                                                                                                                                                                                                                                                                                                                                                                                                                                                              |
| entry into cell of other organism involved in symbiotic interaction          | GO:0051806 | 5.02E-02 | 1.20E-01 | Ceacam1,26365:up Gas6,14456:up Ptx3,19288:up                                                                                                                                                                                                                                                                                                                                                                                                                                                                                                                                                                                                                                                                                                                                |
| leukocyte mediated cytotoxicity                                              | GO:0001909 | 5.07E-02 | 1.20E-01 | Ceacam1,26365:up Clec2d,93694:up Ccl2,20296:up Igf2,16002:up                                                                                                                                                                                                                                                                                                                                                                                                                                                                                                                                                                                                                                                                                                                |
| regulation of synapse assembly                                               | GO:0051963 | 5.07E-02 | 1.20E-01 | Srpx2,68792:down Flrt2,399558:down Wnt5a,22418:down Thbs2,21826:down                                                                                                                                                                                                                                                                                                                                                                                                                                                                                                                                                                                                                                                                                                        |
| cellular response to hormone stimulus                                        | GO:0032870 | 5.08E-02 | 1.20E-01 | Pparg,19016:up Akr1c18,105349:up Egfr,13649:down Sfrp1,20377:up Inhba,16323:down Igf1,16000:up Bmp4,12159:up Adipoq,11450:up Vdr,22337:down Mmp2,17390:down Ptgir,19222:up Enpp1,18605:down Igf2,16002:up                                                                                                                                                                                                                                                                                                                                                                                                                                                                                                                                                                   |
| inorganic anion transport                                                    | GO:0015698 | 5.09E-02 | 1.20E-01 | Ank,11732:down Fxyd1,56188:up Fgfr1,14182:down Sfrp4,20379:up Enpp1,18605:down                                                                                                                                                                                                                                                                                                                                                                                                                                                                                                                                                                                                                                                                                              |
| synapse assembly                                                             | GO:0007416 | 5.09E-02 | 1.20E-01 | Srpx2,68792:down Flrt2,399558:down Plxnd1,67784:up Wnt5a,22418:down Thbs2,21826:down                                                                                                                                                                                                                                                                                                                                                                                                                                                                                                                                                                                                                                                                                        |
| negative regulation of cellular biosynthetic process                         | GO:0031327 | 5.12E-02 | 1.20E-01 | Sfrp4,20379:up Egfr,13649:down Eras1,13819:up Ankrd1,107765:down Vdr,22337:down Fabp4,11770:up Vegfa,22339:down Gas6,14456:up Pparg,19016:up Tnf,21926:up Loxl2,94352:down Loxl3,16950:down Akr1c18,105349:up Lmcd1,30937:up Fgfr1,14182:down Egfr,13649:down Hmox1,15368:up Sfrp1,20377:up C1qtnf3,81799:down Wnt5a,22418:down Ccl4,20303:up Grem1,23892:up Adipoq,11450:up Bmp4,12159:up Sfrp2,20319:up Prg4,96875:down Errfi1,74155:down Enpp1,18605:down Fgfr2,14183:up S100a1,20193:up                                                                                                                                                                                                                                                                                 |
| establishment of localization in cell                                        | GO:0051649 | 5.13E-02 | 1.20E-01 | Ice1,218333:down Adm,11535:up Ccl2,20296:up Mmp13,17386:up Ankrd1,107765:down Gpm6b,14758:up Clec4n,56620:up Postn,50706:down Akr1c18,105349:up Cd24a,12484:down Ncam1,17967:down Wnt5a,22418:down Bmpr1a,12166:down Il1rn,16181:up Maob,109731:up Adipoq,11450:up Bmp4,12159:up Igf1,16000:up Tgfb2,21808:down Creb3l1,26427:down Fgfr2,14183:up Il1rl1,17082:down Clec4e,56619:up Htr2b,15559:down Inhba,16323:down Ccl3,20302:up Cxcl12,20315:up Htr2a,15558:down Serpine2,20720:up Pparg,19016:up Gas6,14456:up Tnf,21926:up Glp1r,14652:down Egfr,13649:down Fgfr1,14182:down Sec23a,20334:down Lpl,16956:up Hmox1,15368:up Sfrp1,20377:up C1qtnf3,81799:down Cd4,12504:up Ptgs2,19225:down Sncg,20618:up Grem1,23892:up Ceacam1,26365:up Sfrp2,20319:up Sy13,80976:up |
| organic cyclic compound catabolic process                                    | GO:1901361 | 5.19E-02 | 1.20E-01 | Akr1c18,105349:up Hmox1,15368:up Enpp5,83965:up Igf1,16000:up Hal,15109:up Htr2a,15558:down Igf1,16000:up Blvr,233016:up Enpp1,18605:down Enpp3,209558:down                                                                                                                                                                                                                                                                                                                                                                                                                                                                                                                                                                                                                 |
| cellular response to biotic stimulus                                         | GO:0071216 | 5.22E-02 | 1.20E-01 | Ankrd1,107765:down Tnf,21926:up Mrc1,17533:up Wnt5a,22418:down Ccl2,20296:up Ccl12,20293:up                                                                                                                                                                                                                                                                                                                                                                                                                                                                                                                                                                                                                                                                                 |
| negative regulation of cell activation                                       | GO:0050866 | 5.22E-02 | 1.20E-01 | Ceacam1,26365:up Cd24a,12484:down Sfrp1,20377:up Hmox1,15368:up Serpine2,20720:up Bmp4,12159:up                                                                                                                                                                                                                                                                                                                                                                                                                                                                                                                                                                                                                                                                             |
| negative regulation of intracellular transport                               | GO:0032387 | 5.26E-02 | 1.20E-01 | Gas6,14456:up Hmox1,15368:up C1qtnf3,81799:down Tgfb2,21808:down Adipoq,11450:up                                                                                                                                                                                                                                                                                                                                                                                                                                                                                                                                                                                                                                                                                            |
| glycosaminoglycan metabolic process                                          | GO:0030203 | 5.27E-02 | 1.20E-01 | Mamdc2,71738:down Chst11,58250:down Has2,15117:down Igf1,16000:up                                                                                                                                                                                                                                                                                                                                                                                                                                                                                                                                                                                                                                                                                                           |
| aminoglycan biosynthetic process                                             | GO:0006023 | 5.29E-02 | 1.20E-01 | Chst11,58250:down Has2,15117:down Igf1,16000:up                                                                                                                                                                                                                                                                                                                                                                                                                                                                                                                                                                                                                                                                                                                             |
| cerebral cortex cell migration                                               | GO:0021795 | 5.29E-02 | 1.20E-01 | Fgfr1,14182:down Egfr,13649:down Cx3cr1,13051:down                                                                                                                                                                                                                                                                                                                                                                                                                                                                                                                                                                                                                                                                                                                          |
| natural killer cell mediated cytotoxicity                                    | GO:0042267 | 5.29E-02 | 1.20E-01 | Ceacam1,26365:up Clec2d,93694:up Igf2,16002:up                                                                                                                                                                                                                                                                                                                                                                                                                                                                                                                                                                                                                                                                                                                              |
| negative regulation of tumor necrosis factor superfamily cytokine production | GO:1903556 | 5.29E-02 | 1.20E-01 | Gas6,14456:up Errfi1,74155:down Adipoq,11450:up                                                                                                                                                                                                                                                                                                                                                                                                                                                                                                                                                                                                                                                                                                                             |
| modification by host of symbiont morphology or physiology                    | GO:0051851 | 5.29E-02 | 1.20E-01 | Ceacam1,26365:up Ptx3,19288:up Ccl4,20303:up                                                                                                                                                                                                                                                                                                                                                                                                                                                                                                                                                                                                                                                                                                                                |
| glutathione metabolic process                                                | GO:0006749 | 5.29E-02 | 1.20E-01 | Ggt5,23887:up Gstm1,14862:up Gstt1,14871:up                                                                                                                                                                                                                                                                                                                                                                                                                                                                                                                                                                                                                                                                                                                                 |
| immune complex clearance                                                     | GO:0002434 | 5.33E-02 | 1.20E-01 | Ccl2,20296:up                                                                                                                                                                                                                                                                                                                                                                                                                                                                                                                                                                                                                                                                                                                                                               |
| positive regulation of hepatocyte differentiation                            | GO:0070368 | 5.33E-02 | 1.20E-01 | Bmp4,12159:up                                                                                                                                                                                                                                                                                                                                                                                                                                                                                                                                                                                                                                                                                                                                                               |
| negative regulation of plasminogen activation                                | GO:0010757 | 5.33E-02 | 1.20E-01 | Serpine2,20720:up                                                                                                                                                                                                                                                                                                                                                                                                                                                                                                                                                                                                                                                                                                                                                           |
| regulation of serine phosphorylation of STAT3 protein                        | GO:1903261 | 5.33E-02 | 1.20E-01 | Ret,19713:up                                                                                                                                                                                                                                                                                                                                                                                                                                                                                                                                                                                                                                                                                                                                                                |
| single-organism reproductive behavior                                        | GO:0044704 | 5.33E-02 | 1.20E-01 | Serpine2,20720:up                                                                                                                                                                                                                                                                                                                                                                                                                                                                                                                                                                                                                                                                                                                                                           |
| cellular response to insulin-like growth factor stimulus                     | GO:1990314 | 5.33E-02 | 1.20E-01 | Igf1,16000:up                                                                                                                                                                                                                                                                                                                                                                                                                                                                                                                                                                                                                                                                                                                                                               |
| UMP biosynthetic process                                                     | GO:0006222 | 5.33E-02 | 1.20E-01 | Uck2,80914:down                                                                                                                                                                                                                                                                                                                                                                                                                                                                                                                                                                                                                                                                                                                                                             |
| Mullerian duct regression                                                    | GO:0001880 | 5.33E-02 | 1.20E-01 | Bmpr1a,12166:down                                                                                                                                                                                                                                                                                                                                                                                                                                                                                                                                                                                                                                                                                                                                                           |

|                                                                                       |            |          |          |                     |
|---------------------------------------------------------------------------------------|------------|----------|----------|---------------------|
| cholangiocyte apoptotic process                                                       | GO:1902488 | 5.33E-02 | 1.20E-01 | Igf1,16000:up       |
| non-canonical Wnt signaling pathway involved in heart development                     | GO:0061341 | 5.33E-02 | 1.20E-01 | Wnt5a,22418:down    |
| pyrimidine ribonucleoside monophosphate metabolic process                             | GO:0009173 | 5.33E-02 | 1.20E-01 | Uck2,80914:down     |
| insulin receptor signaling pathway via phosphatidylinositol 3-kinase                  | GO:0038028 | 5.33E-02 | 1.20E-01 | Igf2,16002:up       |
| vitamin D3 metabolic process                                                          | GO:0070640 | 5.33E-02 | 1.20E-01 | Fgfr1,14182:down    |
| negative regulation of glomerular mesangial cell proliferation                        | GO:0072125 | 5.33E-02 | 1.20E-01 | Bmp4,12159:up       |
| regulation of platelet-derived growth factor production                               | GO:0090361 | 5.33E-02 | 1.20E-01 | Ptgs2,19225:down    |
| cyclooxygenase pathway                                                                | GO:0019371 | 5.33E-02 | 1.20E-01 | Ptgs2,19225:down    |
| Peyer's patch morphogenesis                                                           | GO:0061146 | 5.33E-02 | 1.20E-01 | Ret,19713:up        |
| glial cell-derived neurotrophic factor receptor signaling pathway                     | GO:0035860 | 5.33E-02 | 1.20E-01 | Sulf1,240725:down   |
| modulation by host or viral molecular function                                        | GO:0044868 | 5.33E-02 | 1.20E-01 | Ptx3,19288:up       |
| positive regulation of CDP-diacylglycerol-serine O-phosphatidyltransferase activity   | GO:1904219 | 5.33E-02 | 1.20E-01 | Serinc2,230779:down |
| hexitol metabolic process                                                             | GO:0006059 | 5.33E-02 | 1.20E-01 | Sord,20322:up       |
| negative regulation of low-density lipoprotein particle receptor biosynthetic process | GO:0045715 | 5.33E-02 | 1.20E-01 | Adipoq,11450:up     |
| microglial cell activation involved in immune response                                | GO:0002282 | 5.33E-02 | 1.20E-01 | Cx3cr1,13051:down   |
| positive regulation of vitamin D biosynthetic process                                 | GO:0060557 | 5.33E-02 | 1.20E-01 | Tnf,21926:up        |
| pyrimidine ribonucleoside monophosphate biosynthetic process                          | GO:0009174 | 5.33E-02 | 1.20E-01 | Uck2,80914:down     |
| positive regulation of lymphangiogenesis                                              | GO:1901492 | 5.33E-02 | 1.20E-01 | Vegfa,22339:down    |
| activation of membrane attack complex                                                 | GO:0001905 | 5.33E-02 | 1.20E-01 | C3,12266:up         |
| olfactory pit development                                                             | GO:0060166 | 5.33E-02 | 1.20E-01 | Aldh1a3,56847:down  |
| positive regulation of vitamin D 24-hydroxylase activity                              | GO:0010980 | 5.33E-02 | 1.20E-01 | Vdr,22337:down      |
| type IIa hypersensitivity                                                             | GO:0001794 | 5.33E-02 | 1.20E-01 | C3,12266:up         |
| L-cysteine metabolic process                                                          | GO:0046439 | 5.33E-02 | 1.20E-01 | Cdo1,12583:up       |
| apoptotic process involved in outflow tract morphogenesis                             | GO:0003275 | 5.33E-02 | 1.20E-01 | Tgfb2,21808:down    |
| regulation of parathyroid hormone secretion                                           | GO:2000828 | 5.33E-02 | 1.20E-01 | Fgfr1,14182:down    |
| regulation of activation of membrane attack complex                                   | GO:0001969 | 5.33E-02 | 1.20E-01 | C3,12266:up         |
| mesenchymal cell proliferation involved in ureteric bud development                   | GO:0072138 | 5.33E-02 | 1.20E-01 | Bmp4,12159:up       |

|                                                                         |            |          |          |                     |
|-------------------------------------------------------------------------|------------|----------|----------|---------------------|
| cellular response to temperature stimulus                               | GO:0071502 | 5.33E-02 | 1.20E-01 | Htr2b,15559:down    |
| positive regulation of type II hypersensitivity                         | GO:0002894 | 5.33E-02 | 1.20E-01 | C3,12266:up         |
| multi-organism membrane fusion                                          | GO:0044800 | 5.33E-02 | 1.20E-01 | Gas6,14456:up       |
| regulation of chondrocyte development                                   | GO:0061181 | 5.33E-02 | 1.20E-01 | Fam101b,76566:down  |
| fusion of virus membrane with host plasma membrane                      | GO:0019064 | 5.33E-02 | 1.20E-01 | Gas6,14456:up       |
| postnatal olfactory bulb interneuron migration                          | GO:0021827 | 5.33E-02 | 1.20E-01 | Fgfr1,14182:down    |
| transforming growth factor beta receptor complex assembly               | GO:0007181 | 5.33E-02 | 1.20E-01 | Tgfb3,21814:up      |
| positive regulation of cAMP-dependent protein kinase activity           | GO:2000481 | 5.33E-02 | 1.20E-01 | Adipoq,11450:up     |
| specification of organ position                                         | GO:0010159 | 5.33E-02 | 1.20E-01 | Bmp4,12159:up       |
| negative regulation of leukocyte tethering or rolling                   | GO:1903237 | 5.33E-02 | 1.20E-01 | Cxcl12,20315:up     |
| negative regulation of glomerulus development                           | GO:0090194 | 5.33E-02 | 1.20E-01 | Bmp4,12159:up       |
| modulation by host of symbiont catalytic activity                       | GO:0052422 | 5.33E-02 | 1.20E-01 | Ptx3,19288:up       |
| mammary gland bud morphogenesis                                         | GO:0060648 | 5.33E-02 | 1.20E-01 | Fgfr2,14183:up      |
| positive regulation of serine C-palmitoyltransferase activity           | GO:1904222 | 5.33E-02 | 1.20E-01 | Serinc2,230779:down |
| negative regulation of synapse assembly                                 | GO:0051964 | 5.33E-02 | 1.20E-01 | Wnt5a,22418:down    |
| metanephric glomerular epithelium development                           | GO:0072244 | 5.33E-02 | 1.20E-01 | Adipoq,11450:up     |
| regulation of transforming growth factor beta3 production               | GO:0032910 | 5.33E-02 | 1.20E-01 | Cd24a,12484:down    |
| Wnt signaling pathway involved in digestive tract morphogenesis         | GO:0044333 | 5.33E-02 | 1.20E-01 | Wnt5a,22418:down    |
| Wnt signaling pathway, calcium modulating pathway                       | GO:0007223 | 5.33E-02 | 1.20E-01 | Wnt5a,22418:down    |
| positive regulation of inorganic anion transmembrane transport          | GO:1903797 | 5.33E-02 | 1.20E-01 | Fxyd1,56188:up      |
| regulation of retinal ganglion cell axon guidance                       | GO:0090259 | 5.33E-02 | 1.20E-01 | Vegfa,22339:down    |
| transforming growth factor beta3 production                             | GO:0032907 | 5.33E-02 | 1.20E-01 | Cd24a,12484:down    |
| extracellular polysaccharide biosynthetic process                       | GO:0045226 | 5.33E-02 | 1.20E-01 | Has2,15117:down     |
| positive regulation of keratinocyte apoptotic process                   | GO:1902174 | 5.33E-02 | 1.20E-01 | Sfrp4,20379:up      |
| regulation of apoptotic process involved in outflow tract morphogenesis | GO:1902256 | 5.33E-02 | 1.20E-01 | Tgfb2,21808:down    |
| extracellular polysaccharide metabolic process                          | GO:0046379 | 5.33E-02 | 1.20E-01 | Has2,15117:down     |
| regulation of chronic inflammatory response to antigenic stimulus       | GO:0002874 | 5.33E-02 | 1.20E-01 | Tnf,21926:up        |

|                                                                                                                       |            |          |          |                      |
|-----------------------------------------------------------------------------------------------------------------------|------------|----------|----------|----------------------|
| positive regulation of type IIa hypersensitivity                                                                      | GO:0001798 | 5.33E-02 | 1.20E-01 | C3,12266:up          |
| positive regulation of integrin biosynthetic process                                                                  | GO:0045726 | 5.33E-02 | 1.20E-01 | Tgfb2,21808:down     |
| negative regulation of cholangiocyte apoptotic process                                                                | GO:1904193 | 5.33E-02 | 1.20E-01 | Igf1,16000:up        |
| planar cell polarity pathway involved in heart morphogenesis                                                          | GO:0061346 | 5.33E-02 | 1.20E-01 | Wnt5a,22418:down     |
| prostate gland stromal morphogenesis                                                                                  | GO:0060741 | 5.33E-02 | 1.20E-01 | Igf1,16000:up        |
| modulation of catalytic activity in other organism involved in symbiotic interaction                                  | GO:0052203 | 5.33E-02 | 1.20E-01 | Ptx3,19288:up        |
| L-cysteine catabolic process                                                                                          | GO:0019448 | 5.33E-02 | 1.20E-01 | Cdo1,12583:up        |
| positive regulation of cell proliferation by VEGF-activated platelet derived growth factor receptor signaling pathway | GO:0038091 | 5.33E-02 | 1.20E-01 | Vegfa,22339:down     |
| regulation of osteoclast proliferation                                                                                | GO:0090289 | 5.33E-02 | 1.20E-01 | Grem1,23892:up       |
| prostate epithelial cord elongation                                                                                   | GO:0060523 | 5.33E-02 | 1.20E-01 | Fgfr2,14183:up       |
| positive regulation of catagen                                                                                        | GO:0051795 | 5.33E-02 | 1.20E-01 | Tgfb2,21808:down     |
| positive regulation of cell-cell adhesion mediated by integrin                                                        | GO:0033634 | 5.33E-02 | 1.20E-01 | Cd24a,12484:down     |
| positive regulation of epithelial cell differentiation involved in kidney development                                 | GO:2000698 | 5.33E-02 | 1.20E-01 | Adipoq,11450:up      |
| negative regulation of cardiac muscle adaptation                                                                      | GO:0010616 | 5.33E-02 | 1.20E-01 | Errfi1,74155:down    |
| regulation of cholangiocyte apoptotic process                                                                         | GO:1904192 | 5.33E-02 | 1.20E-01 | Igf1,16000:up        |
| regulation of cytotoxic T cell differentiation                                                                        | GO:0045583 | 5.33E-02 | 1.20E-01 | Tnfsf9,21950:up      |
| regulation of monocyte aggregation                                                                                    | GO:1900623 | 5.33E-02 | 1.20E-01 | Has2,15117:down      |
| platelet-derived growth factor production                                                                             | GO:0090360 | 5.33E-02 | 1.20E-01 | Ptgs2,19225:down     |
| ureter urothelium development                                                                                         | GO:0072190 | 5.33E-02 | 1.20E-01 | Bmp4,12159:up        |
| striatal medium spiny neuron differentiation                                                                          | GO:0021773 | 5.33E-02 | 1.20E-01 | Inhba,16323:down     |
| positive regulation of transcription from RNA polymerase II promoter involved in smooth muscle cell differentiation   | GO:2000721 | 5.33E-02 | 1.20E-01 | Npnt,114249:up       |
| deltoid tuberosity development                                                                                        | GO:0035993 | 5.33E-02 | 1.20E-01 | Bmp4,12159:up        |
| positive regulation of vitamin metabolic process                                                                      | GO:0046136 | 5.33E-02 | 1.20E-01 | Tnf,21926:up         |
| regulation of vitamin D 24-hydroxylase activity                                                                       | GO:0010979 | 5.33E-02 | 1.20E-01 | Vdr,22337:down       |
| cerebral cortex tangential migration using cell-cell interactions                                                     | GO:0021823 | 5.33E-02 | 1.20E-01 | Fgfr1,14182:down     |
| regulation of endothelial tube morphogenesis                                                                          | GO:1901509 | 5.33E-02 | 1.20E-01 | Adamts12,239337:down |
| mesenchymal stem cell proliferation                                                                                   | GO:0097168 | 5.33E-02 | 1.20E-01 | Bmp4,12159:up        |
| positive regulation of interleukin-18 production                                                                      | GO:0032741 | 5.33E-02 | 1.20E-01 | Tnf,21926:up         |

|                                                                                            |            |          |          |                      |
|--------------------------------------------------------------------------------------------|------------|----------|----------|----------------------|
| cysteine catabolic process                                                                 | GO:0009093 | 5.33E-02 | 1.20E-01 | Cdo1,12583:up        |
| type II hypersensitivity                                                                   | GO:0002445 | 5.33E-02 | 1.20E-01 | C3,12266:up          |
| regulation of cell proliferation involved in outflow tract morphogenesis                   | GO:1901963 | 5.33E-02 | 1.20E-01 | Bmp4,12159:up        |
| negative regulation of Wnt signaling pathway involved in dorsal/ventral axis specification | GO:2000054 | 5.33E-02 | 1.20E-01 | Sfrp1,20377:up       |
| protein kinase D signaling                                                                 | GO:0089700 | 5.33E-02 | 1.20E-01 | Vegfa,22339:down     |
| regulation of type IIa hypersensitivity                                                    | GO:0001796 | 5.33E-02 | 1.20E-01 | C3,12266:up          |
| UMP metabolic process                                                                      | GO:0046049 | 5.33E-02 | 1.20E-01 | Uck2,80914:down      |
| cardiac right atrium morphogenesis                                                         | GO:0003213 | 5.33E-02 | 1.20E-01 | Wnt5a,22418:down     |
| chemorepulsion of axon                                                                     | GO:0061643 | 5.33E-02 | 1.20E-01 | Wnt5a,22418:down     |
| membrane fusion involved in viral entry into host cell                                     | GO:0039663 | 5.33E-02 | 1.20E-01 | Gas6,14456:up        |
| polyprenol catabolic process                                                               | GO:0016095 | 5.33E-02 | 1.20E-01 | Akr1c18,105349:up    |
| epicardial cell to mesenchymal cell transition                                             | GO:0003347 | 5.33E-02 | 1.20E-01 | Tgfb3,21814:up       |
| positive regulation of production of miRNAs involved in gene silencing by miRNA            | GO:1903800 | 5.33E-02 | 1.20E-01 | Egfr,13649:down      |
| oligodendrocyte apoptotic process                                                          | GO:0097252 | 5.33E-02 | 1.20E-01 | Gas6,14456:up        |
| regulation of type II hypersensitivity                                                     | GO:0002892 | 5.33E-02 | 1.20E-01 | C3,12266:up          |
| positive regulation of cytotoxic T cell differentiation                                    | GO:0045585 | 5.33E-02 | 1.20E-01 | Tnfsf9,21950:up      |
| pilomotor reflex                                                                           | GO:0097195 | 5.33E-02 | 1.20E-01 | Npnt,114249:up       |
| 3'-phosphoadenosine 5'-phosphosulfate metabolic process                                    | GO:0050427 | 5.33E-02 | 1.20E-01 | Enpp1,18605:down     |
| chronic inflammatory response to antigenic stimulus                                        | GO:0002439 | 5.33E-02 | 1.20E-01 | Tnf,21926:up         |
| positive regulation of superoxide dismutase activity                                       | GO:1901671 | 5.33E-02 | 1.20E-01 | Tnf,21926:up         |
| positive regulation of monocyte aggregation                                                | GO:1900625 | 5.33E-02 | 1.20E-01 | Has2,15117:down      |
| substrate-dependent cell migration, cell attachment to substrate                           | GO:0006931 | 5.33E-02 | 1.20E-01 | Tnfrsf12a,27279:down |
| positive regulation of calcdiol 1-monooxygenase activity                                   | GO:0060559 | 5.33E-02 | 1.20E-01 | Tnf,21926:up         |
| regulation of CDP-diacylglycerol-serine O-phosphatidyltransferase activity                 | GO:1904217 | 5.33E-02 | 1.20E-01 | Serinc2,230779:down  |
| regulation of isoprenoid metabolic process                                                 | GO:0019747 | 5.33E-02 | 1.20E-01 | Akr1c18,105349:up    |
| VEGF-activated platelet-derived growth factor receptor signaling pathway                   | GO:0038086 | 5.33E-02 | 1.20E-01 | Vegfa,22339:down     |
| platelet-derived growth factor receptor-alpha signaling pathway                            | GO:0035790 | 5.33E-02 | 1.20E-01 | Adipoq,11450:up      |

|                                                                                      |            |          |          |                                                                                                                                                                                                                                                                                                                                                                                                                                                                                                                 |
|--------------------------------------------------------------------------------------|------------|----------|----------|-----------------------------------------------------------------------------------------------------------------------------------------------------------------------------------------------------------------------------------------------------------------------------------------------------------------------------------------------------------------------------------------------------------------------------------------------------------------------------------------------------------------|
| positive regulation of RNA metabolic process                                         | GO:0051254 | 5.45E-02 | 1.22E-01 | Fstl3,83554:down Ice1,218333:down Epas1,13819:up Lyl1,17095:up Sdpr,20324:down Trf,22041:up Wnt5a,22418:down Bmpr1a,12166:down Bmp4,12159:up Igf1,16000:up Ret,19713:up Ppp3,67916:up Creb3l1,26427:down Fgfr2,14183:up Pri2c2,18811:up Rasl11a,68895:up Inhba,16323:down Ccl3,20302:up Vdr,22337:down Vegfa,22339:down Igf2,16002:up Slc40a1,53945:up Tnf,21926:up Pparg,19016:up Glp1r,14652:down Egfr,13649:down Fgfr1,14182:down Sfrp1,20377:up Tgfb3,21814:up Grem1,23892:up Sfrp2,20319:up Npnt,114249:up |
| endothelial cell chemotaxis                                                          | GO:0035767 | 5.46E-02 | 1.22E-01 | Fgfr1,14182:down Vegfa,22339:down                                                                                                                                                                                                                                                                                                                                                                                                                                                                               |
| trachea development                                                                  | GO:0060438 | 5.46E-02 | 1.22E-01 | Rspo2,239405:up Bmp4,12159:up                                                                                                                                                                                                                                                                                                                                                                                                                                                                                   |
| smooth muscle tissue development                                                     | GO:0048745 | 5.46E-02 | 1.22E-01 | Col3a1,12825:down Bmp4,12159:up                                                                                                                                                                                                                                                                                                                                                                                                                                                                                 |
| thymocyte apoptotic process                                                          | GO:0070242 | 5.46E-02 | 1.22E-01 | Wnt5a,22418:down Bmp4,12159:up                                                                                                                                                                                                                                                                                                                                                                                                                                                                                  |
| positive regulation of interleukin-1 beta production                                 | GO:0032731 | 5.46E-02 | 1.22E-01 | Wnt5a,22418:down Ccl3,20302:up                                                                                                                                                                                                                                                                                                                                                                                                                                                                                  |
| cell surface receptor signaling pathway involved in heart development                | GO:0061311 | 5.46E-02 | 1.22E-01 | Wnt5a,22418:down Bmp4,12159:up                                                                                                                                                                                                                                                                                                                                                                                                                                                                                  |
| positive regulation of transforming growth factor beta receptor signaling pathway    | GO:0030511 | 5.46E-02 | 1.22E-01 | Tgfb3,21814:up Npnt,114249:up                                                                                                                                                                                                                                                                                                                                                                                                                                                                                   |
| positive regulation of monooxygenase activity                                        | GO:0032770 | 5.46E-02 | 1.22E-01 | Htr2b,15559:down Tnf,21926:up                                                                                                                                                                                                                                                                                                                                                                                                                                                                                   |
| cellular response to interferon-beta                                                 | GO:0035458 | 5.46E-02 | 1.22E-01 | Ifit1,15957:up Ifit3,15959:up                                                                                                                                                                                                                                                                                                                                                                                                                                                                                   |
| positive regulation of cellular response to transforming growth factor beta stimulus | GO:1903846 | 5.46E-02 | 1.22E-01 | Tgfb3,21814:up Npnt,114249:up                                                                                                                                                                                                                                                                                                                                                                                                                                                                                   |
| negative adaptation of signaling pathway                                             | GO:0022401 | 5.46E-02 | 1.22E-01 | Htr2b,15559:down Adm,11535:up                                                                                                                                                                                                                                                                                                                                                                                                                                                                                   |
| desensitization of G-protein coupled receptor protein signaling pathway              | GO:0002029 | 5.46E-02 | 1.22E-01 | Htr2b,15559:down Adm,11535:up                                                                                                                                                                                                                                                                                                                                                                                                                                                                                   |
| definitive hemopoiesis                                                               | GO:0060216 | 5.46E-02 | 1.22E-01 | Lyl1,17095:up Tgfb3,21814:up                                                                                                                                                                                                                                                                                                                                                                                                                                                                                    |
| modulation by virus of host morphology or physiology                                 | GO:0019048 | 5.46E-02 | 1.22E-01 | Ceacam1,26365:up Cd4,12504:up                                                                                                                                                                                                                                                                                                                                                                                                                                                                                   |
| immunoglobulin secretion                                                             | GO:0048305 | 5.46E-02 | 1.22E-01 | Ceacam1,26365:up Tnf,21926:up                                                                                                                                                                                                                                                                                                                                                                                                                                                                                   |
| calcineurin-NFAT signaling cascade                                                   | GO:0033173 | 5.46E-02 | 1.22E-01 | Lmcd1,30937:up Igf1,16000:up                                                                                                                                                                                                                                                                                                                                                                                                                                                                                    |
| cofactor catabolic process                                                           | GO:0051187 | 5.46E-02 | 1.22E-01 | Hmox1,15368:up Blvrb,233016:up                                                                                                                                                                                                                                                                                                                                                                                                                                                                                  |
| negative regulation of organic acid transport                                        | GO:0032891 | 5.46E-02 | 1.22E-01 | Tnf,21926:up Il1rn,16181:up                                                                                                                                                                                                                                                                                                                                                                                                                                                                                     |
| cellular nitrogen compound catabolic process                                         | GO:0044270 | 5.51E-02 | 1.23E-01 | Hmox1,15368:up Enpp5,83965:up Igf1,16000:up Hal,15109:up Htr2a,15558:down Igfbp3,16009:up Blvrb,233016:up Enpp1,18605:down Enpp3,209558:down                                                                                                                                                                                                                                                                                                                                                                    |
| regulation of symbiosis, encompassing mutualism through parasitism                   | GO:0043903 | 5.51E-02 | 1.23E-01 | Tnf,21926:up Lmcd1,30937:up Ptx3,19288:up Slpi,20568:up Ccl4,20303:up Ceacam1,26365:up Oas1,231655:up Ifit1,15957:up Oas3,246727:up                                                                                                                                                                                                                                                                                                                                                                             |
| reproductive process                                                                 | GO:0022414 | 5.55E-02 | 1.24E-01 | Adm,11535:up Hpgd,15446:up Inhba,16323:down Gjb5,14622:down Ednrb,13618:up Plat,18791:down Epas1,13819:up Vdr,22337:down Cxcl12,20315:up Vegfa,22339:down Mmp2,17390:down Serpine2,20720:up Pparg,19016:up Akr1c18,105349:up Egfr,13649:down Alpl,11647:up Sfrp1,20377:up Sulf1,240725:down Wnt5a,22418:down Bmpr1a,12166:down Ptgs2,19225:down Bmp4,12159:up Igf1,16000:up Sfrp2,20319:up Tnc,21923:down Fgfr2,14183:up Kitl,17311:up                                                                          |
| reproduction                                                                         | GO:000003  | 5.55E-02 | 1.24E-01 | Adm,11535:up Hpgd,15446:up Inhba,16323:down Gjb5,14622:down Ednrb,13618:up Plat,18791:down Epas1,13819:up Vdr,22337:down Cxcl12,20315:up Vegfa,22339:down Mmp2,17390:down Serpine2,20720:up Pparg,19016:up Akr1c18,105349:up Egfr,13649:down Alpl,11647:up Sfrp1,20377:up Sulf1,240725:down Wnt5a,22418:down Bmpr1a,12166:down Ptgs2,19225:down Bmp4,12159:up Igf1,16000:up Sfrp2,20319:up Tnc,21923:down Fgfr2,14183:up Kitl,17311:up                                                                          |
| regulation of peptide transport                                                      | GO:0090087 | 5.56E-02 | 1.24E-01 | Tnf,21926:up Pparg,19016:up Glp1r,14652:down Egfr,13649:down Sfrp1,20377:up C1qtnf3,81799:down Ptgs2,19225:down Grem1,23892:up                                                                                                                                                                                                                                                                                                                                                                                  |
| neuron death                                                                         | GO:0070997 | 5.57E-02 | 1.24E-01 | Tnf,21926:up Glp1r,14652:down Hmox1,15368:up Ccl12,20293:up Ccl3,20302:up Igf1,16000:up Crif1,12931:down Vegfa,22339:down Tgfb2,21808:down Mt1,17748:up                                                                                                                                                                                                                                                                                                                                                         |
| hormone biosynthetic process                                                         | GO:0042446 | 5.57E-02 | 1.24E-01 | Akr1c18,105349:up Igf2,16002:up Igf1,16000:up                                                                                                                                                                                                                                                                                                                                                                                                                                                                   |
| positive regulation of calcium ion import                                            | GO:0090280 | 5.57E-02 | 1.24E-01 | Cxcl12,20315:up Ccl12,20293:up Stc1,20855:up                                                                                                                                                                                                                                                                                                                                                                                                                                                                    |
| negative regulation of JAK-STAT cascade                                              | GO:0046426 | 5.57E-02 | 1.24E-01 | Flrt2,399558:down Lrrc15,74488:down Aspn,66695:down                                                                                                                                                                                                                                                                                                                                                                                                                                                             |

|                                                             |            |          |          |                                                                                                                                                                |
|-------------------------------------------------------------|------------|----------|----------|----------------------------------------------------------------------------------------------------------------------------------------------------------------|
| catecholamine secretion                                     | GO:0050432 | 5.57E-02 | 1.24E-01 | Cxcl12,20315:up Htr2a,15558:down Snccg,20618:up                                                                                                                |
| regulation of mitotic nuclear division                      | GO:007088  | 5.59E-02 | 1.25E-01 | Tnf,21926:up Igf2,16002:up Fgfr2,14183:up Igf1,16000:up Bmp4,12159:up                                                                                          |
| negative regulation of neuron death                         | GO:1901215 | 5.62E-02 | 1.25E-01 | Glp1r,14652:down Crif1,12931:down Hmox1,15368:up Vegfa,22339:down Ccl12,20293:up Mt1,17748:up Igf1,16000:up                                                    |
| metanephros development                                     | GO:001656  | 5.69E-02 | 1.27E-01 | Ret,19713:up Grem1,23892:up Bmp4,12159:up Adipoq,11450:up                                                                                                      |
| JAK-STAT cascade                                            | GO:007259  | 5.80E-02 | 1.29E-01 | Flrt2,399558:down Crif1,12931:down Ret,19713:up Lrrc15,74488:down Aspn,66695:down Igf1,16000:up                                                                |
| interleukin-1 beta production                               | GO:0032611 | 5.86E-02 | 1.30E-01 | Wnt5a,22418:down Errfi1,74155:down Ccl3,20302:up                                                                                                               |
| natural killer cell mediated immunity                       | GO:002228  | 5.86E-02 | 1.30E-01 | Ceacam1,26365:up Clec2d,93694:up Igf2,16002:up                                                                                                                 |
| negative regulation of T cell proliferation                 | GO:0042130 | 5.86E-02 | 1.30E-01 | Ceacam1,26365:up Cd24a,12484:down Bmp4,12159:up                                                                                                                |
| labyrinthine layer development                              | GO:0060711 | 5.86E-02 | 1.30E-01 | Adm,11535:up Gjb5,14622:down Fgfr2,14183:up                                                                                                                    |
| negative regulation of I-kappaB kinase/NF-kappaB signaling  | GO:0043124 | 5.86E-02 | 1.30E-01 | C1qtnf3,81799:down Irl1,17082:down Adipoq,11450:up                                                                                                             |
| sequence-specific DNA binding transcription factor activity | GO:0051090 | 5.87E-02 | 1.30E-01 | Tnf,21926:up Pparg,19016:up Gas6,14456:up Hmox1,15368:up Wnt5a,22418:down Tgfb3,21814:up Sfrp4,20379:up Grem1,23892:up Vegfa,22339:down Plpp3,67916:up         |
| negative regulation of cell cycle                           | GO:0045786 | 5.87E-02 | 1.30E-01 | Plk2,20620:down Egfr,13649:down Hpgd,15446:up Inhba,16323:down Susd2,71733:up Ptgs2,19225:down Bmp4,12159:up Nabp1,109019:down Tgfb2,21808:down Fgfr2,14183:up |
| catechol-containing compound biosynthetic process           | GO:0009713 | 5.93E-02 | 1.31E-01 | Tgfb2,21808:down Epas1,13819:up                                                                                                                                |
| regulation of protein localization to cell surface          | GO:2000008 | 5.93E-02 | 1.31E-01 | Tnf,21926:up Gpm6b,14758:up                                                                                                                                    |
| heparan sulfate proteoglycan metabolic process              | GO:0030201 | 5.93E-02 | 1.31E-01 | Sulf1,240725:down Hpse,15442:up                                                                                                                                |
| negative regulation of glucose transport                    | GO:0010829 | 5.93E-02 | 1.31E-01 | Tnf,21926:up Enpp1,18605:down                                                                                                                                  |
| physiological cardiac muscle hypertrophy                    | GO:0003301 | 5.93E-02 | 1.31E-01 | Wisp1,22402:down Igf1,16000:up                                                                                                                                 |
| regulation of cell maturation                               | GO:1903429 | 5.93E-02 | 1.31E-01 | Ret,19713:up Ednrb,13618:up                                                                                                                                    |
| regulation of cGMP metabolic process                        | GO:0030823 | 5.93E-02 | 1.31E-01 | Wnt5a,22418:down Vegfa,22339:down                                                                                                                              |
| catecholamine biosynthetic process                          | GO:0042423 | 5.93E-02 | 1.31E-01 | Tgfb2,21808:down Epas1,13819:up                                                                                                                                |
| cell growth involved in cardiac muscle cell development     | GO:0061049 | 5.93E-02 | 1.31E-01 | Wisp1,22402:down Igf1,16000:up                                                                                                                                 |
| antibacterial humoral response                              | GO:0019731 | 5.93E-02 | 1.31E-01 | Adm,11535:up Slpi,20568:up                                                                                                                                     |
| physiological muscle hypertrophy                            | GO:0003298 | 5.93E-02 | 1.31E-01 | Wisp1,22402:down Igf1,16000:up                                                                                                                                 |
| organ regeneration                                          | GO:0031100 | 5.93E-02 | 1.31E-01 | Cxcl12,20315:up Hmox1,15368:up                                                                                                                                 |
| regulation of smooth muscle cell differentiation            | GO:0051150 | 5.93E-02 | 1.31E-01 | Fgfr2,14183:up Bmp4,12159:up                                                                                                                                   |
| glycerolipid biosynthetic process                           | GO:0045017 | 5.94E-02 | 1.31E-01 | Htr2b,15559:down Fabp5,16592:up Lpl,16956:up Htr2a,15558:down C3,12266:up                                                                                      |
| response to oxidative stress                                | GO:0006979 | 6.07E-02 | 1.34E-01 | Tnf,21926:up Akr1c18,105349:up Hp,15439:up Hmox1,15368:up Ptgs2,19225:down Epas1,13819:up Bmp4,12159:up Adipoq,11450:up Pxdn,69675:down Mmp2,17390:down        |
| regulation of DNA biosynthetic process                      | GO:2000278 | 6.12E-02 | 1.35E-01 | Ankrd1,107765:down Pparg,19016:up Grem1,23892:up Adipoq,11450:up                                                                                               |
| neuroepithelial cell differentiation                        | GO:0060563 | 6.12E-02 | 1.35E-01 | Fgfr1,14182:down Mcoln3,171166:up Ednrb,13618:up Kitl,17311:up                                                                                                 |
| epidermal growth factor receptor signaling pathway          | GO:0007173 | 6.12E-02 | 1.35E-01 | Ceacam1,26365:up Egfr,13649:down Efemp1,216616:up Errfi1,74155:down                                                                                            |
| cyclic-nucleotide-mediated signaling                        | GO:0019935 | 6.15E-02 | 1.35E-01 | Glp1r,14652:down Ptgir,19222:up Ednrb,13618:up                                                                                                                 |
| interaction with symbiont                                   | GO:0051702 | 6.15E-02 | 1.35E-01 | Ceacam1,26365:up Ptx3,19288:up Ccl4,20303:up                                                                                                                   |
| glandular epithelial cell differentiation                   | GO:0002067 | 6.15E-02 | 1.35E-01 | Wnt5a,22418:down Fgfr2,14183:up Bmp4,12159:up                                                                                                                  |
| catechol-containing compound metabolic process              | GO:0009712 | 6.15E-02 | 1.35E-01 | Tgfb2,21808:down Maob,109731:up Epas1,13819:up                                                                                                                 |
| epithelial cell morphogenesis                               | GO:0003382 | 6.15E-02 | 1.35E-01 | Stc1,20855:up Grem1,23892:up Bmp4,12159:up                                                                                                                     |



|                                                                                    |            |          |          |                                                                                                                                                                                                                                                                                                                                                                                                                                                                                                                                                                                                                                 |
|------------------------------------------------------------------------------------|------------|----------|----------|---------------------------------------------------------------------------------------------------------------------------------------------------------------------------------------------------------------------------------------------------------------------------------------------------------------------------------------------------------------------------------------------------------------------------------------------------------------------------------------------------------------------------------------------------------------------------------------------------------------------------------|
| regulation of endocrine process                                                    | GO:0044060 | 6.15E-02 | 1.35E-01 | Fgfr1,14182:down C1qtnf3,81799:down Inhba,16323:down                                                                                                                                                                                                                                                                                                                                                                                                                                                                                                                                                                            |
| catecholamine metabolic process                                                    | GO:0006584 | 6.15E-02 | 1.35E-01 | Tgfb2,21808:down Maob,109731:up Epas1,13819:up                                                                                                                                                                                                                                                                                                                                                                                                                                                                                                                                                                                  |
| heterocycle catabolic process                                                      | GO:0046700 | 6.16E-02 | 1.35E-01 | Hmox1,15368:up Enpp5,83965:up Igf1,16000:up Hal,15109:up Htr2a,15558:down Igf1,16000:up Bmp4,12159:up Enpp1,18605:down Enpp3,209558:down                                                                                                                                                                                                                                                                                                                                                                                                                                                                                        |
| camera-type eye development                                                        | GO:0043010 | 6.27E-02 | 1.38E-01 | Egfr,13649:down Inhba,16323:down Aldh1a2,19378:up Col8a1,12837:down Ninj1,18081:up Bmp4,12159:up Vegfa,22339:down Aldh1a3,56847:down Fgfr2,14183:up                                                                                                                                                                                                                                                                                                                                                                                                                                                                             |
| establishment of protein localization                                              | GO:0045184 | 6.27E-02 | 1.38E-01 | Ice1,218333:down Ccl2,20296:up Mmp13,17386:up Ankrd1,107765:down Gpm6b,14758:up Clec4n,56620:up Postn,50706:down Akr1c18,105349:up Cd24a,12484:down Wnt5a,22418:down Bmpr1a,12166:down Il1rn,16181:up Adipoq,11450:up Bmp4,12159:up Igf1,16000:up Tgfb2,21808:down Il1rl1,17082:down Clec4e,56619:up Htr2b,15559:down Ccl3,20302:up Lrrc15,74488:down Kdelr3,105785:down Tnf,21926:up Pparg,19016:up Gas6,14456:up Glp1r,14652:down Egfr,13649:down Sfrp1,20377:up Lpl,16956:up Sec23a,20334:down C1qtnf3,81799:down Tfrc,22042:up Ptgs2,19225:down Snca,20618:up Grem1,23892:up Ceacam1,26365:up Sfrp2,20319:up Npnt,114249:up |
| calcium ion transmembrane transport                                                | GO:0070588 | 6.28E-02 | 1.38E-01 | Htr2b,15559:down Gas6,14456:up Glp1r,14652:down Tgfb2,21808:down Htr2a,15558:down S100a1,20193:up Bmp4,12159:up                                                                                                                                                                                                                                                                                                                                                                                                                                                                                                                 |
| positive regulation of sequence-specific DNA binding transcription factor activity | GO:0051091 | 6.28E-02 | 1.38E-01 | Tnf,21926:up Pparg,19016:up Wnt5a,22418:down Vegfa,22339:down Tgfb3,21814:up Plpp3,67916:up Grem1,23892:up                                                                                                                                                                                                                                                                                                                                                                                                                                                                                                                      |
| positive regulation of myeloid cell differentiation                                | GO:0045639 | 6.35E-02 | 1.39E-01 | Tnf,21926:up Inhba,16323:down Ccl3,20302:up Kitl,17311:up                                                                                                                                                                                                                                                                                                                                                                                                                                                                                                                                                                       |
| muscle adaptation                                                                  | GO:0043500 | 6.35E-02 | 1.39E-01 | Lmcd1,30937:up Wisp1,22402:down Erff1,74155:down Igf1,16000:up                                                                                                                                                                                                                                                                                                                                                                                                                                                                                                                                                                  |
| cell maturation                                                                    | GO:0048469 | 6.41E-02 | 1.40E-01 | Pparg,19016:up Fgfr1,14182:down Ret,19713:up Vegfa,22339:down Ednrb,13618:up Epas1,13819:up                                                                                                                                                                                                                                                                                                                                                                                                                                                                                                                                     |
| positive regulation of collagen biosynthetic process                               | GO:0032967 | 6.42E-02 | 1.40E-01 | Ccl2,20296:up Bmp4,12159:up                                                                                                                                                                                                                                                                                                                                                                                                                                                                                                                                                                                                     |
| reflex                                                                             | GO:0060004 | 6.42E-02 | 1.40E-01 | Aldh1a3,56847:down Npnt,114249:up                                                                                                                                                                                                                                                                                                                                                                                                                                                                                                                                                                                               |
| positive regulation of T cell migration                                            | GO:2000406 | 6.42E-02 | 1.40E-01 | Cxcl12,20315:up Wnt5a,22418:down                                                                                                                                                                                                                                                                                                                                                                                                                                                                                                                                                                                                |
| substrate-dependent cell migration                                                 | GO:0006929 | 6.42E-02 | 1.40E-01 | Tnfrsf12a,27279:down Fgfr1,14182:down                                                                                                                                                                                                                                                                                                                                                                                                                                                                                                                                                                                           |
| regulation of cellular extravasation                                               | GO:0002691 | 6.42E-02 | 1.40E-01 | Cxcl12,20315:up Ccl2,20296:up                                                                                                                                                                                                                                                                                                                                                                                                                                                                                                                                                                                                   |
| type B pancreatic cell differentiation                                             | GO:0003309 | 6.42E-02 | 1.40E-01 | Wnt5a,22418:down Bmp4,12159:up                                                                                                                                                                                                                                                                                                                                                                                                                                                                                                                                                                                                  |
| regulation of pri-miRNA transcription from RNA polymerase II promoter              | GO:1902893 | 6.42E-02 | 1.40E-01 | Bmpr1a,12166:down Bmp4,12159:up                                                                                                                                                                                                                                                                                                                                                                                                                                                                                                                                                                                                 |
| positive regulation of cardiac muscle hypertrophy                                  | GO:0010613 | 6.42E-02 | 1.40E-01 | Wisp1,22402:down Igf1,16000:up                                                                                                                                                                                                                                                                                                                                                                                                                                                                                                                                                                                                  |
| androgen metabolic process                                                         | GO:0008209 | 6.42E-02 | 1.40E-01 | Akr1c18,105349:up Adm,11535:up                                                                                                                                                                                                                                                                                                                                                                                                                                                                                                                                                                                                  |
| adaptation of signaling pathway                                                    | GO:0023058 | 6.42E-02 | 1.40E-01 | Htr2b,15559:down Adm,11535:up                                                                                                                                                                                                                                                                                                                                                                                                                                                                                                                                                                                                   |
| positive regulation of muscle hypertrophy                                          | GO:0014742 | 6.42E-02 | 1.40E-01 | Wisp1,22402:down Igf1,16000:up                                                                                                                                                                                                                                                                                                                                                                                                                                                                                                                                                                                                  |
| embryonic hemopoiesis                                                              | GO:0035162 | 6.42E-02 | 1.40E-01 | Vegfa,22339:down Kitl,17311:up                                                                                                                                                                                                                                                                                                                                                                                                                                                                                                                                                                                                  |
| heart formation                                                                    | GO:0060914 | 6.42E-02 | 1.40E-01 | Bmpr1a,12166:down Bmp4,12159:up                                                                                                                                                                                                                                                                                                                                                                                                                                                                                                                                                                                                 |
| regulation of catenin import into nucleus                                          | GO:0035412 | 6.42E-02 | 1.40E-01 | Sfrp2,20319:up Egfr,13649:down                                                                                                                                                                                                                                                                                                                                                                                                                                                                                                                                                                                                  |
| organ induction                                                                    | GO:0001759 | 6.42E-02 | 1.40E-01 | Fgfr1,14182:down Bmp4,12159:up                                                                                                                                                                                                                                                                                                                                                                                                                                                                                                                                                                                                  |
| pericardium development                                                            | GO:0060039 | 6.42E-02 | 1.40E-01 | Wnt5a,22418:down Tgfb3,21814:up                                                                                                                                                                                                                                                                                                                                                                                                                                                                                                                                                                                                 |
| positive regulation of synaptic transmission, glutamatergic                        | GO:0051968 | 6.42E-02 | 1.40E-01 | Egfr,13649:down Ptgs2,19225:down                                                                                                                                                                                                                                                                                                                                                                                                                                                                                                                                                                                                |
| atrioventricular valve development                                                 | GO:0003171 | 6.42E-02 | 1.40E-01 | Tgfb2,21808:down Bmpr1a,12166:down                                                                                                                                                                                                                                                                                                                                                                                                                                                                                                                                                                                              |
| glandular epithelial cell development                                              | GO:0002068 | 6.42E-02 | 1.40E-01 | Wnt5a,22418:down Bmp4,12159:up                                                                                                                                                                                                                                                                                                                                                                                                                                                                                                                                                                                                  |
| protein targeting                                                                  | GO:0006605 | 6.44E-02 | 1.40E-01 | Tnf,21926:up Gas6,14456:up Akr1c18,105349:up Egfr,13649:down C1qtnf3,81799:down Bmpr1a,12166:down Ccl2,20296:up Ptgs2,19225:down Grem1,23892:up Igf1,16000:up Bmp4,12159:up Ceacam1,26365:up Sfrp2,20319:up Tgfb2,21808:down                                                                                                                                                                                                                                                                                                                                                                                                    |
| regulation of alcohol biosynthetic process                                         | GO:1902930 | 6.45E-02 | 1.40E-01 | Vdr,22337:down Tnf,21926:up Akr1c18,105349:up                                                                                                                                                                                                                                                                                                                                                                                                                                                                                                                                                                                   |
| negative regulation of cellular protein localization                               | GO:1903828 | 6.48E-02 | 1.41E-01 | Gas6,14456:up Gpm6b,14758:up C1qtnf3,81799:down Lrrc15,74488:down Adipoq,11450:up                                                                                                                                                                                                                                                                                                                                                                                                                                                                                                                                               |

|                                                                                                      |            |          |          |                                                                                                                                                                                                                                                                                                                                                                    |
|------------------------------------------------------------------------------------------------------|------------|----------|----------|--------------------------------------------------------------------------------------------------------------------------------------------------------------------------------------------------------------------------------------------------------------------------------------------------------------------------------------------------------------------|
| organic acid transport                                                                               | GO:0015849 | 6.53E-02 | 1.42E-01 | Tnf,21926:up Pparg,19016:up Fxyd1,56188:up Irn,16181:up Serinc2,230779:down Fam132b,227358:down Emb,13723:up Slc16a4,229699:down                                                                                                                                                                                                                                   |
| alpha-amino acid metabolic process                                                                   | GO:1901605 | 6.56E-02 | 1.42E-01 | P4ha1,18451:down Ddah1,69219:down Gatm,67092:down Gft2,14584:down Serinc2,230779:down Hal,15109:up Cdo1,12583:up                                                                                                                                                                                                                                                   |
| regulation of generation of precursor metabolites and energy                                         | GO:0043467 | 6.57E-02 | 1.42E-01 | Htr2a,15558:down Enpp1,18605:down Igf2,16002:up Igf1,16000:up                                                                                                                                                                                                                                                                                                      |
| protein maturation                                                                                   | GO:0051604 | 6.61E-02 | 1.43E-01 | Tnf,21926:up Pparg,19016:up C3,12266:up Plat,18791:down Serpinh1,12406:down Ctla2a,13024:down Serping1,12258:up Serpine2,20720:up F3,14066:up                                                                                                                                                                                                                      |
| cellular lipid metabolic process                                                                     | GO:0044255 | 6.62E-02 | 1.43E-01 | Htr2b,15559:down Hpgd,15446:up Aoah,27052:up Aldh1a2,19378:up C3,12266:up Fabp4,11770:up Fam132b,227358:down Htr2a,15558:down Pparg,19016:up Ggt5,23887:up Akr1c18,105349:up Fabp5,16592:up Lpl,16956:up Ptgs2,19225:down Serinc2,230779:down Adipoq,11450:up Crabp2,12904:down Aldh1a3,56847:down Prkar2b,19088:up Plpp3,67916:up                                 |
| neuron apoptotic process                                                                             | GO:0051402 | 6.65E-02 | 1.44E-01 | Tnf,21926:up Glp1r,14652:down Hmox1,15368:up Ccl12,20293:up Ccl3,20302:up Crlf1,12931:down Tgfb2,21808:down Mt1,17748:up                                                                                                                                                                                                                                           |
| defense response to bacterium                                                                        | GO:0042742 | 6.70E-02 | 1.44E-01 | Adams4,240913:down Tnf,21926:up Adm,11535:up Hp,15439:up Cd4,12504:up Slpi,20568:up Clec4e,56619:up                                                                                                                                                                                                                                                                |
| neurological system process                                                                          | GO:0050877 | 6.75E-02 | 1.44E-01 | Ednrb,13618:up Epas1,13819:up Shroom4,208431:down Htr2a,15558:down Cx3cr1,13051:down Serpine2,20720:up Igf2,16002:up Tnf,21926:up Plk2,20620:down Trf,22041:up Glp1r,14652:down Col11a1,12814:down Egfr,13649:down Fgfr1,14182:down Ncam1,17967:down Mme,17380:up Ptgs2,19225:down Irn,16181:up Igf1,16000:up Mcoln3,171166:up Aldh1a3,56847:down Prkar2b,19088:up |
| cellular response to ketone                                                                          | GO:1901655 | 6.76E-02 | 1.44E-01 | Gas6,14456:up Postn,50706:down Bmp4,12159:up                                                                                                                                                                                                                                                                                                                       |
| cellular carbohydrate catabolic process                                                              | GO:0044275 | 6.76E-02 | 1.44E-01 | Sord,20322:up Htr2a,15558:down Igf1,16000:up                                                                                                                                                                                                                                                                                                                       |
| macrophage activation                                                                                | GO:0042116 | 6.76E-02 | 1.44E-01 | Wnt5a,22418:down Cx3cr1,13051:down Il1r1,17082:down                                                                                                                                                                                                                                                                                                                |
| regulation of interleukin-8 production                                                               | GO:0032677 | 6.76E-02 | 1.44E-01 | Tnf,21926:up Wnt5a,22418:down Adipoq,11450:up                                                                                                                                                                                                                                                                                                                      |
| establishment of protein localization to organelle                                                   | GO:0072594 | 6.84E-02 | 1.44E-01 | Tnf,21926:up Gas6,14456:up Akr1c18,105349:up Egfr,13649:down C1qtnf3,81799:down Bmpr1a,12166:down Ptgs2,19225:down Grem1,23892:up Igf1,16000:up Bmp4,12159:up Ceacam1,26365:up Sfrp2,20319:up Tgfb2,21808:down                                                                                                                                                     |
| cellular response to lipopolysaccharide                                                              | GO:0071222 | 6.86E-02 | 1.44E-01 | Ankrd1,107765:down Tnf,21926:up Mrc1,17533:up Ccl2,20296:up Ccl12,20293:up                                                                                                                                                                                                                                                                                         |
| extracellular matrix assembly                                                                        | GO:0085029 | 6.93E-02 | 1.44E-01 | Gpm6b,14758:up Has2,15117:down                                                                                                                                                                                                                                                                                                                                     |
| apoptotic nuclear changes                                                                            | GO:0030262 | 6.93E-02 | 1.44E-01 | Cd24a,12484:down Igf1,16000:up                                                                                                                                                                                                                                                                                                                                     |
| response to X-ray                                                                                    | GO:0010165 | 6.93E-02 | 1.44E-01 | Sfrp2,20319:up Sfrp1,20377:up                                                                                                                                                                                                                                                                                                                                      |
| copulation                                                                                           | GO:0007620 | 6.93E-02 | 1.44E-01 | Serpine2,20720:up Ednrb,13618:up                                                                                                                                                                                                                                                                                                                                   |
| positive regulation of collagen metabolic process                                                    | GO:0010714 | 6.93E-02 | 1.44E-01 | Ccl2,20296:up Bmp4,12159:up                                                                                                                                                                                                                                                                                                                                        |
| regulation of superoxide metabolic process                                                           | GO:0090322 | 6.93E-02 | 1.44E-01 | Tnf,21926:up Egfr,13649:down                                                                                                                                                                                                                                                                                                                                       |
| cellular component disassembly involved in execution phase of apoptosis                              | GO:0006921 | 6.93E-02 | 1.44E-01 | Cd24a,12484:down Igf1,16000:up                                                                                                                                                                                                                                                                                                                                     |
| cellular zinc ion homeostasis                                                                        | GO:0006882 | 6.93E-02 | 1.44E-01 | Mt2,17750:up Mt1,17748:up                                                                                                                                                                                                                                                                                                                                          |
| catenin import into nucleus                                                                          | GO:0003541 | 6.93E-02 | 1.44E-01 | Sfrp2,20319:up Egfr,13649:down                                                                                                                                                                                                                                                                                                                                     |
| metanephric mesenchymal cell migration                                                               | GO:0003578 | 7.04E-02 | 1.44E-01 | Adipoq,11450:up                                                                                                                                                                                                                                                                                                                                                    |
| regulation of branching involved in salivary gland morphogenesis by mesenchymal-epithelial signaling | GO:0060665 | 7.04E-02 | 1.44E-01 | Fgfr1,14182:down                                                                                                                                                                                                                                                                                                                                                   |
| glycosylation of protein-linked mannose residue                                                      | GO:0044845 | 7.04E-02 | 1.44E-01 | Sdf2l1,64136:up                                                                                                                                                                                                                                                                                                                                                    |
| negative regulation of neurotransmitter uptake                                                       | GO:0051581 | 7.04E-02 | 1.44E-01 | Gpm6b,14758:up                                                                                                                                                                                                                                                                                                                                                     |
| regulation of cardiac muscle hypertrophy in response to stress                                       | GO:1903242 | 7.04E-02 | 1.44E-01 | Errfi1,74155:down                                                                                                                                                                                                                                                                                                                                                  |
| negative regulation of B cell differentiation                                                        | GO:0045578 | 7.04E-02 | 1.44E-01 | Sfrp1,20377:up                                                                                                                                                                                                                                                                                                                                                     |
| positive regulation of melanocyte differentiation                                                    | GO:0045636 | 7.04E-02 | 1.44E-01 | Kitl,17311:up                                                                                                                                                                                                                                                                                                                                                      |

|                                                                                                    |            |          |          |                     |
|----------------------------------------------------------------------------------------------------|------------|----------|----------|---------------------|
| positive regulation of sodium ion export from cell                                                 | GO:1903278 | 7.04E-02 | 1.44E-01 | Fxyd1,56188:up      |
| protection from natural killer cell mediated cytotoxicity                                          | GO:0042270 | 7.04E-02 | 1.44E-01 | Clec2d,93694:up     |
| modification by host of symbiont molecular function                                                | GO:0052428 | 7.04E-02 | 1.44E-01 | Ptx3,19288:up       |
| negative regulation of cholesterol storage                                                         | GO:0010887 | 7.04E-02 | 1.44E-01 | Pparg,19016:up      |
| cell wall macromolecule biosynthetic process                                                       | GO:0044038 | 7.04E-02 | 1.44E-01 | Sdf2l1,64136:up     |
| negative regulation of serotonin uptake                                                            | GO:0051612 | 7.04E-02 | 1.44E-01 | Gpm6b,14758:up      |
| positive regulation of hair follicle maturation                                                    | GO:0048818 | 7.04E-02 | 1.44E-01 | Tgfb2,21808:down    |
| positive regulation of DNA catabolic process                                                       | GO:1903626 | 7.04E-02 | 1.44E-01 | Igfbp3,16009:up     |
| axis elongation involved in somitogenesis                                                          | GO:0090245 | 7.04E-02 | 1.44E-01 | Sfrp1,20377:up      |
| regulation of serine C-palmitoyltransferase activity                                               | GO:1904220 | 7.04E-02 | 1.44E-01 | Serinc2,230779:down |
| regulation of dermatome development                                                                | GO:0061183 | 7.04E-02 | 1.44E-01 | Sfrp2,20319:up      |
| positive regulation of oligodendrocyte progenitor proliferation                                    | GO:0070447 | 7.04E-02 | 1.44E-01 | Trf,22041:up        |
| ascending aorta morphogenesis                                                                      | GO:0035910 | 7.04E-02 | 1.44E-01 | Tgfb2,21808:down    |
| cytotoxic T cell differentiation                                                                   | GO:0045065 | 7.04E-02 | 1.44E-01 | Tnfsf9,21950:up     |
| regulation of mast cell proliferation                                                              | GO:0070666 | 7.04E-02 | 1.44E-01 | Kitl,17311:up       |
| tendon cell differentiation                                                                        | GO:0035990 | 7.04E-02 | 1.44E-01 | Bmp4,12159:up       |
| sodium-dependent phosphate transport                                                               | GO:0044341 | 7.04E-02 | 1.44E-01 | Sfrp4,20379:up      |
| trachea cartilage morphogenesis                                                                    | GO:0060535 | 7.04E-02 | 1.44E-01 | Rspo2,239405:up     |
| regulation of sodium ion export                                                                    | GO:1903273 | 7.04E-02 | 1.44E-01 | Fxyd1,56188:up      |
| negative regulation of neuron maturation                                                           | GO:0014043 | 7.04E-02 | 1.44E-01 | Ednrb,13618:up      |
| regulation of serotonin uptake                                                                     | GO:0051611 | 7.04E-02 | 1.44E-01 | Gpm6b,14758:up      |
| ascending aorta development                                                                        | GO:0035905 | 7.04E-02 | 1.44E-01 | Tgfb2,21808:down    |
| response to heparin                                                                                | GO:0071503 | 7.04E-02 | 1.44E-01 | Sfrp1,20377:up      |
| cellular lactam metabolic process                                                                  | GO:0072338 | 7.04E-02 | 1.44E-01 | Mme,17380:up        |
| trophectodermal cell proliferation                                                                 | GO:0001834 | 7.04E-02 | 1.44E-01 | Igf1,16000:up       |
| regulation of catagen                                                                              | GO:0051794 | 7.04E-02 | 1.44E-01 | Tgfb2,21808:down    |
| modulation by symbiont of host molecular function                                                  | GO:0052055 | 7.04E-02 | 1.44E-01 | Ptx3,19288:up       |
| creatinine metabolic process                                                                       | GO:0046449 | 7.04E-02 | 1.44E-01 | Mme,17380:up        |
| regulation of mast cell cytokine production                                                        | GO:0032763 | 7.04E-02 | 1.44E-01 | Hmox1,15368:up      |
| positive regulation of transcription from RNA polymerase II promoter involved in heart development | GO:1901228 | 7.04E-02 | 1.44E-01 | Grem1,23892:up      |
| progesterone secretion                                                                             | GO:0042701 | 7.04E-02 | 1.44E-01 | Inhba,16323:down    |
| negative regulation of bicellular tight junction assembly                                          | GO:1903347 | 7.04E-02 | 1.44E-01 | Tnf,21926:up        |
| positive regulation of mast cell proliferation                                                     | GO:0070668 | 7.04E-02 | 1.44E-01 | Kitl,17311:up       |

|                                                                                       |            |          |          |                      |
|---------------------------------------------------------------------------------------|------------|----------|----------|----------------------|
| ureter morphogenesis                                                                  | GO:0072197 | 7.04E-02 | 1.44E-01 | Bmp4,12159:up        |
| tendon formation                                                                      | GO:0035992 | 7.04E-02 | 1.44E-01 | Bmp4,12159:up        |
| positive regulation of humoral immune response mediated by circulating immunoglobulin | GO:0002925 | 7.04E-02 | 1.44E-01 | Tnf,21926:up         |
| regulation of hepatocyte differentiation                                              | GO:0070366 | 7.04E-02 | 1.44E-01 | Bmp4,12159:up        |
| cellular response to heparin                                                          | GO:0071504 | 7.04E-02 | 1.44E-01 | Sfrp1,20377:up       |
| maintenance of blood-brain barrier                                                    | GO:0035633 | 7.04E-02 | 1.44E-01 | Ptgs2,19225:down     |
| dermatome development                                                                 | GO:0061054 | 7.04E-02 | 1.44E-01 | Sfrp2,20319:up       |
| cell migration involved in metanephros development                                    | GO:0035788 | 7.04E-02 | 1.44E-01 | Adipoq,11450:up      |
| positive regulation of mammary gland involution                                       | GO:1903521 | 7.04E-02 | 1.44E-01 | Vdr,22337:down       |
| mannoprotein metabolic process                                                        | GO:0006056 | 7.04E-02 | 1.44E-01 | Sdf2l1,64136:up      |
| mast cell proliferation                                                               | GO:0070662 | 7.04E-02 | 1.44E-01 | Kitl,17311:up        |
| regulation of sodium ion export from cell                                             | GO:1903276 | 7.04E-02 | 1.44E-01 | Fxyd1,56188:up       |
| regulation of hepatocyte growth factor receptor signaling pathway                     | GO:1902202 | 7.04E-02 | 1.44E-01 | Adamts12,239337:down |
| cell proliferation involved in mesonephros development                                | GO:0061209 | 7.04E-02 | 1.44E-01 | Bmp4,12159:up        |
| hematopoietic stem cell migration                                                     | GO:0035701 | 7.04E-02 | 1.44E-01 | Gas6,14456:up        |
| pyrimidine-containing compound salvage                                                | GO:0008655 | 7.04E-02 | 1.44E-01 | Uck2,80914:down      |
| cell wall glycoprotein biosynthetic process                                           | GO:0031506 | 7.04E-02 | 1.44E-01 | Sdf2l1,64136:up      |
| mesenchymal cell proliferation involved in ureter development                         | GO:0072198 | 7.04E-02 | 1.44E-01 | Bmp4,12159:up        |
| negative regulation of apoptotic process in bone marrow                               | GO:0071866 | 7.04E-02 | 1.44E-01 | Fgfr2,14183:up       |
| cellular component macromolecule biosynthetic process                                 | GO:0070589 | 7.04E-02 | 1.44E-01 | Sdf2l1,64136:up      |
| pyrimidine nucleoside salvage                                                         | GO:0043097 | 7.04E-02 | 1.44E-01 | Uck2,80914:down      |
| astrocyte activation                                                                  | GO:0048143 | 7.04E-02 | 1.44E-01 | Egfr,13649:down      |
| comma-shaped body morphogenesis                                                       | GO:0072049 | 7.04E-02 | 1.44E-01 | Bmp4,12159:up        |
| IMP salvage                                                                           | GO:0032264 | 7.04E-02 | 1.44E-01 | Ampd3,11717:up       |
| regulation of apoptotic process in bone marrow                                        | GO:0071865 | 7.04E-02 | 1.44E-01 | Fgfr2,14183:up       |
| negative regulation by host of symbiont molecular function                            | GO:0052405 | 7.04E-02 | 1.44E-01 | Ptx3,19288:up        |
| vein smooth muscle contraction                                                        | GO:0014826 | 7.04E-02 | 1.44E-01 | Ednrb,13618:up       |
| opsonization                                                                          | GO:0008228 | 7.04E-02 | 1.44E-01 | Ptx3,19288:up        |
| bud outgrowth involved in lung branching                                              | GO:0060447 | 7.04E-02 | 1.44E-01 | Tnc,21923:down       |
| cell wall biogenesis                                                                  | GO:0042546 | 7.04E-02 | 1.44E-01 | Sdf2l1,64136:up      |

|                                                                                                                            |            |          |          |                   |
|----------------------------------------------------------------------------------------------------------------------------|------------|----------|----------|-------------------|
| positive regulation of transcription from RNA polymerase II promoter involved in myocardial precursor cell differentiation | GO:0003257 | 7.04E-02 | 1.44E-01 | Grem1,23892:up    |
| regulation of dendritic cell apoptotic process                                                                             | GO:2000668 | 7.04E-02 | 1.44E-01 | Gas6,14456:up     |
| apoptotic process involved in mammary gland involution                                                                     | GO:0060057 | 7.04E-02 | 1.44E-01 | Vdr,22337:down    |
| positive regulation of apoptotic process involved in morphogenesis                                                         | GO:1902339 | 7.04E-02 | 1.44E-01 | Vdr,22337:down    |
| positive regulation of cell-cell adhesion mediated by cadherin                                                             | GO:2000049 | 7.04E-02 | 1.44E-01 | Wnt5a,22418:down  |
| negative regulation of mesodermal cell fate specification                                                                  | GO:0042662 | 7.04E-02 | 1.44E-01 | Sfrp2,20319:up    |
| mesendoderm development                                                                                                    | GO:0048382 | 7.04E-02 | 1.44E-01 | Bmpr1a,12166:down |
| mammary gland specification                                                                                                | GO:0060594 | 7.04E-02 | 1.44E-01 | Fgfr2,14183:up    |
| regulation of mesenchymal cell proliferation involved in ureter development                                                | GO:0072199 | 7.04E-02 | 1.44E-01 | Bmp4,12159:up     |
| positive regulation of pancreatic juice secretion                                                                          | GO:0090187 | 7.04E-02 | 1.44E-01 | Mmp13,17386:up    |
| activation of transmembrane receptor protein tyrosine kinase activity                                                      | GO:0007171 | 7.04E-02 | 1.44E-01 | Pdgfc,54635:down  |
| regulation of interleukin-1-mediated signaling pathway                                                                     | GO:2000659 | 7.04E-02 | 1.44E-01 | Il1rn,16181:up    |
| prostate gland morphogenetic growth                                                                                        | GO:0060737 | 7.04E-02 | 1.44E-01 | Fgfr2,14183:up    |
| positive regulation of apoptotic process involved in mammary gland involution                                              | GO:0060058 | 7.04E-02 | 1.44E-01 | Vdr,22337:down    |
| cell wall mannoprotein biosynthetic process                                                                                | GO:0000032 | 7.04E-02 | 1.44E-01 | Sdf2l1,64136:up   |
| positive regulation of sodium ion export                                                                                   | GO:1903275 | 7.04E-02 | 1.44E-01 | Fxyd1,56188:up    |
| regulation of superoxide dismutase activity                                                                                | GO:1901668 | 7.04E-02 | 1.44E-01 | Tnf,21926:up      |
| positive regulation of cytokine secretion involved in immune response                                                      | GO:0002741 | 7.04E-02 | 1.44E-01 | Wnt5a,22418:down  |
| phosphate ion transmembrane transport                                                                                      | GO:0035435 | 7.04E-02 | 1.44E-01 | Ank,11732:down    |
| regulation of metanephric mesenchymal cell migration                                                                       | GO:2000589 | 7.04E-02 | 1.44E-01 | Adipoq,11450:up   |
| negative regulation of mast cell apoptotic process                                                                         | GO:0033026 | 7.04E-02 | 1.44E-01 | Kitl,17311:up     |
| regulation of testosterone biosynthetic process                                                                            | GO:2000224 | 7.04E-02 | 1.44E-01 | Akr1c18,105349:up |
| positive regulation of endothelial cell chemotaxis to fibroblast growth factor                                             | GO:2000546 | 7.04E-02 | 1.44E-01 | Fgfr1,14182:down  |
| positive regulation of apoptotic DNA fragmentation                                                                         | GO:1902512 | 7.04E-02 | 1.44E-01 | Igfbp3,16009:up   |
| ferrous iron import into cell                                                                                              | GO:0097460 | 7.04E-02 | 1.44E-01 | Trf,22041:up      |

|                                                                                   |            |          |          |                                                                                                                                                          |
|-----------------------------------------------------------------------------------|------------|----------|----------|----------------------------------------------------------------------------------------------------------------------------------------------------------|
| regulation of branch elongation involved in ureteric bud branching                | GO:0072095 | 7.04E-02 | 1.44E-01 | Bmp4,12159:up                                                                                                                                            |
| regulation of T cell homeostatic proliferation                                    | GO:0046013 | 7.04E-02 | 1.44E-01 | Cd24a,12484:down                                                                                                                                         |
| regulation of interleukin-18 production                                           | GO:0032661 | 7.04E-02 | 1.44E-01 | Tnf,21926:up                                                                                                                                             |
| positive regulation of glomerular filtration                                      | GO:0003104 | 7.04E-02 | 1.44E-01 | Gas6,14456:up                                                                                                                                            |
| regulation of phosphate transport                                                 | GO:0010966 | 7.04E-02 | 1.44E-01 | Sfrp4,20379:up                                                                                                                                           |
| regulation of L-glutamate transport                                               | GO:0002036 | 7.04E-02 | 1.44E-01 | Tnf,21926:up                                                                                                                                             |
| Fc-gamma receptor signaling pathway                                               | GO:0038094 | 7.04E-02 | 1.44E-01 | Clec4e,56619:up                                                                                                                                          |
| endodermal digestive tract morphogenesis                                          | GO:0061031 | 7.04E-02 | 1.44E-01 | Fgfr2,14183:up                                                                                                                                           |
| dense core granule biogenesis                                                     | GO:0061110 | 7.04E-02 | 1.44E-01 | Serpine2,20720:up                                                                                                                                        |
| dendritic cell apoptotic process                                                  | GO:0097048 | 7.04E-02 | 1.44E-01 | Gas6,14456:up                                                                                                                                            |
| regulation of Wnt signaling pathway involved in dorsal/ventral axis specification | GO:2000053 | 7.04E-02 | 1.44E-01 | Sfrp1,20377:up                                                                                                                                           |
| positive regulation of mast cell chemotaxis                                       | GO:0060754 | 7.04E-02 | 1.44E-01 | Figf,14205:up                                                                                                                                            |
| exocyst assembly                                                                  | GO:0001927 | 7.04E-02 | 1.44E-01 | Ncam1,17967:down                                                                                                                                         |
| regulation of mammary gland involution                                            | GO:1903519 | 7.04E-02 | 1.44E-01 | Vdr,22337:down                                                                                                                                           |
| myoblast fate commitment                                                          | GO:0048625 | 7.04E-02 | 1.44E-01 | Epas1,13819:up                                                                                                                                           |
| negative regulation of lymphocyte migration                                       | GO:2000402 | 7.04E-02 | 1.44E-01 | Ccl12,20293:up                                                                                                                                           |
| regulation of ribonuclease activity                                               | GO:0060700 | 7.04E-02 | 1.44E-01 | Oas3,246727:up                                                                                                                                           |
| negative regulation of macrophage cytokine production                             | GO:0010936 | 7.04E-02 | 1.44E-01 | Tgfb2,21808:down                                                                                                                                         |
| mannoprotein biosynthetic process                                                 | GO:0006057 | 7.04E-02 | 1.44E-01 | Sdf2l1,64136:up                                                                                                                                          |
| diencephalon morphogenesis                                                        | GO:0048852 | 7.04E-02 | 1.44E-01 | Wnt5a,22418:down                                                                                                                                         |
| spongiotrophoblast differentiation                                                | GO:0060708 | 7.04E-02 | 1.44E-01 | Gjb5,14622:down                                                                                                                                          |
| purine ribonucleoside bisphosphate metabolic process                              | GO:0034035 | 7.04E-02 | 1.44E-01 | Enpp1,18605:down                                                                                                                                         |
| activation of MAPK activity                                                       | GO:0000187 | 7.04E-02 | 1.44E-01 | Tnf,21926:up Trf,22041:up Wnt5a,22418:down Igf1,16000:up                                                                                                 |
| sulfur compound biosynthetic process                                              | GO:0044272 | 7.04E-02 | 1.44E-01 | Chst11,58250:down Ggt5,23887:up Igf1,16000:up Cdo1,12583:up                                                                                              |
| regulation of myotube differentiation                                             | GO:0010830 | 7.08E-02 | 1.45E-01 | Ccl8,20307:up Cxcl9,17329:up Cxcl12,20315:up                                                                                                             |
| regulation of immunoglobulin production                                           | GO:0002637 | 7.08E-02 | 1.45E-01 | Ceacam1,26365:up Tnf,21926:up Tfrc,22042:up                                                                                                              |
| positive regulation of myeloid leukocyte differentiation                          | GO:0002763 | 7.08E-02 | 1.45E-01 | Tnf,21926:up Ccl3,20302:up Kitl,17311:up                                                                                                                 |
| pigment metabolic process                                                         | GO:0004244 | 7.08E-02 | 1.45E-01 | Hmox1,15368:up Wnt5a,22418:down Blvrb,233016:up                                                                                                          |
| mucopolysaccharide metabolic process                                              | GO:1903510 | 7.08E-02 | 1.45E-01 | Mamdc2,71738:down Chst11,58250:down Has2,15117:down                                                                                                      |
| aromatic compound catabolic process                                               | GO:0019439 | 7.10E-02 | 1.45E-01 | Hmox1,15368:up Enpp5,83965:up Igf1,16000:up Hal,15109:up Htr2a,15558:down Igf1,16000:up Blvrb,233016:up Enpp1,18605:down Enpp3,209558:down               |
| fatty acid metabolic process                                                      | GO:0006631 | 7.16E-02 | 1.46E-01 | Ggt5,23887:up Pparg,19016:up Hpgd,15446:up Lpl,16956:up C3,12266:up Ptgs2,19225:down Adipoq,11450:up Fabp4,11770:up Fam132b,227358:down Prkar2b,19088:up |
| male sex differentiation                                                          | GO:0046661 | 7.25E-02 | 1.48E-01 | Sfrp2,20319:up Sfrp1,20377:up Wnt5a,22418:down Inhba,16323:down Bmpr1a,12166:down                                                                        |
| kidney morphogenesis                                                              | GO:0060993 | 7.28E-02 | 1.48E-01 | Vegfa,22339:down Nptn,114249:up Grem1,23892:up Bmp4,12159:up                                                                                             |
| negative regulation of sequestering of calcium ion                                | GO:0051283 | 7.28E-02 | 1.48E-01 | Htr2b,15559:down Glp1r,14652:down Tgfb2,21808:down Htr2a,15558:down                                                                                      |

|                                                            |            |          |          |                                                                                                                                                                                                                                                                                                                                                                                                                                                       |
|------------------------------------------------------------|------------|----------|----------|-------------------------------------------------------------------------------------------------------------------------------------------------------------------------------------------------------------------------------------------------------------------------------------------------------------------------------------------------------------------------------------------------------------------------------------------------------|
| release of sequestered calcium ion into cytosol            | GO:0051209 | 7.28E-02 | 1.48E-01 | Htr2b,15559:down Glp1r,14652:down Tgfb2,21808:down Htr2a,15558:down                                                                                                                                                                                                                                                                                                                                                                                   |
| response to peptide hormone                                | GO:0043434 | 7.32E-02 | 1.49E-01 | Pparg,19016:up lgf1,16000:up Adipoq,11450:up Serpina3g,20715:up Gatm,67092:down lgf2,16002:up Enpp1,18605:down Cdo1,12583:up                                                                                                                                                                                                                                                                                                                          |
| columnar/cuboidal epithelial cell development              | GO:0020666 | 7.40E-02 | 1.51E-01 | Fgfr1,14182:down Wnt5a,22418:down Bmp4,12159:up                                                                                                                                                                                                                                                                                                                                                                                                       |
| extracellular matrix disassembly                           | GO:0022617 | 7.44E-02 | 1.51E-01 | Tgfb2,21808:down Mmp13,17386:up                                                                                                                                                                                                                                                                                                                                                                                                                       |
| regulation of B cell differentiation                       | GO:0045577 | 7.44E-02 | 1.51E-01 | Cd24a,12484:down Sfrp1,20377:up                                                                                                                                                                                                                                                                                                                                                                                                                       |
| positive regulation of ATP metabolic process               | GO:1903580 | 7.44E-02 | 1.51E-01 | Htr2a,15558:down lgf1,16000:up                                                                                                                                                                                                                                                                                                                                                                                                                        |
| establishment of epithelial cell polarity                  | GO:0090162 | 7.44E-02 | 1.51E-01 | Ptk7,71461:down Wnt5a,22418:down                                                                                                                                                                                                                                                                                                                                                                                                                      |
| pri-miRNA transcription from RNA polymerase II promoter    | GO:0061614 | 7.44E-02 | 1.51E-01 | Bmpr1a,12166:down Bmp4,12159:up                                                                                                                                                                                                                                                                                                                                                                                                                       |
| negative regulation of neural precursor cell proliferation | GO:2000178 | 7.44E-02 | 1.51E-01 | Cd24a,12484:down Wnt5a,22418:down                                                                                                                                                                                                                                                                                                                                                                                                                     |
| response to type I interferon                              | GO:0034340 | 7.44E-02 | 1.51E-01 | Wnt5a,22418:down Ifit1,15957:up                                                                                                                                                                                                                                                                                                                                                                                                                       |
| positive regulation of nucleoside metabolic process        | GO:0045979 | 7.44E-02 | 1.51E-01 | Htr2a,15558:down lgf1,16000:up                                                                                                                                                                                                                                                                                                                                                                                                                        |
| negative regulation of cytokine biosynthetic process       | GO:0042036 | 7.44E-02 | 1.51E-01 | Prg4,96875:down Errfi1,74155:down                                                                                                                                                                                                                                                                                                                                                                                                                     |
| zinc ion homeostasis                                       | GO:0055069 | 7.44E-02 | 1.51E-01 | Mt2,17750:up Mt1,17748:up                                                                                                                                                                                                                                                                                                                                                                                                                             |
| melanocyte differentiation                                 | GO:0030318 | 7.44E-02 | 1.51E-01 | Ednrb,13618:up Kitl,17311:up                                                                                                                                                                                                                                                                                                                                                                                                                          |
| metanephros morphogenesis                                  | GO:0003338 | 7.44E-02 | 1.51E-01 | Grem1,23892:up Bmp4,12159:up                                                                                                                                                                                                                                                                                                                                                                                                                          |
| carboxylic acid biosynthetic process                       | GO:0046394 | 7.45E-02 | 1.51E-01 | Ggt5,23887:up Akr1c18,105349:up Lpl,16956:up Aldh1a2,19378:up Ptgs2,19225:down Gatm,67092:down Aldh1a3,56847:down Cdo1,12583:up                                                                                                                                                                                                                                                                                                                       |
| organic acid biosynthetic process                          | GO:0016053 | 7.45E-02 | 1.51E-01 | Ggt5,23887:up Akr1c18,105349:up Lpl,16956:up Aldh1a2,19378:up Ptgs2,19225:down Gatm,67092:down Aldh1a3,56847:down Cdo1,12583:up                                                                                                                                                                                                                                                                                                                       |
| regulation of sequestering of calcium ion                  | GO:0051282 | 7.52E-02 | 1.52E-01 | Htr2b,15559:down Glp1r,14652:down Tgfb2,21808:down Htr2a,15558:down                                                                                                                                                                                                                                                                                                                                                                                   |
| nephron tubule development                                 | GO:0072080 | 7.52E-02 | 1.52E-01 | Vegfa,22339:down Npnt,114249:up Grem1,23892:up Bmp4,12159:up                                                                                                                                                                                                                                                                                                                                                                                          |
| calcium ion transmembrane import into cytosol              | GO:0097553 | 7.52E-02 | 1.52E-01 | Htr2b,15559:down Glp1r,14652:down Tgfb2,21808:down Htr2a,15558:down                                                                                                                                                                                                                                                                                                                                                                                   |
| calcium ion import into cytosol                            | GO:1902656 | 7.52E-02 | 1.52E-01 | Htr2b,15559:down Glp1r,14652:down Tgfb2,21808:down Htr2a,15558:down                                                                                                                                                                                                                                                                                                                                                                                   |
| peptidyl-serine modification                               | GO:0018209 | 7.59E-02 | 1.54E-01 | Mamdc2,71738:down Tnf,21926:up Gas6,14456:up Plk2,20620:down Wnt5a,22418:down Sfrp2,20319:up Ret,19713:up Vegfa,22339:down                                                                                                                                                                                                                                                                                                                            |
| peptide transport                                          | GO:0015833 | 7.60E-02 | 1.54E-01 | Tnf,21926:up Pparg,19016:up Glp1r,14652:down Egfr,13649:down Sfrp1,20377:up C1qtnf3,81799:down Ptgs2,19225:down Il1rn,16181:up Grem1,23892:up                                                                                                                                                                                                                                                                                                         |
| hormone-mediated signaling pathway                         | GO:0009755 | 7.75E-02 | 1.57E-01 | Vdr,22337:down Pparg,19016:up Sfrp1,20377:up lgf1,16000:up Bmp4,12159:up Adipoq,11450:up                                                                                                                                                                                                                                                                                                                                                              |
| female pregnancy                                           | GO:0007565 | 7.77E-02 | 1.57E-01 | Vdr,22337:down Hpgd,15446:up Ptgs2,19225:down Mmp2,17390:down                                                                                                                                                                                                                                                                                                                                                                                         |
| sequestering of calcium ion                                | GO:0051208 | 7.77E-02 | 1.57E-01 | Htr2b,15559:down Glp1r,14652:down Tgfb2,21808:down Htr2a,15558:down                                                                                                                                                                                                                                                                                                                                                                                   |
| ERBB signaling pathway                                     | GO:0038127 | 7.77E-02 | 1.57E-01 | Ceacam1,26365:up Egfr,13649:down Efemp1,216616:up Errfi1,74155:down                                                                                                                                                                                                                                                                                                                                                                                   |
| phenol-containing compound metabolic process               | GO:0018958 | 7.77E-02 | 1.57E-01 | Wnt5a,22418:down Tgfb2,21808:down Maob,109731:up Epas1,13819:up                                                                                                                                                                                                                                                                                                                                                                                       |
| neuron projection morphogenesis                            | GO:0048812 | 7.80E-02 | 1.57E-01 | Flrt2,399558:down Lama2,16773:down Egfr,13649:down Plxnd1,67784:up Wnt5a,22418:down Sema7a,20361:down Tnfrsf12a,27279:down Crabp2,12904:down Ret,19713:up Cxcl12,20315:up Postn,50706:down Vegfa,22339:down Tgfb2,21808:down Fgfr2,14183:up                                                                                                                                                                                                           |
| regulation of stem cell differentiation                    | GO:2000736 | 7.85E-02 | 1.58E-01 | Sfrp2,20319:up Sfrp1,20377:up Tgfb2,21808:down Tgfb3,21814:up Grem1,23892:up                                                                                                                                                                                                                                                                                                                                                                          |
| negative regulation of macromolecule biosynthetic process  | GO:0010558 | 7.93E-02 | 1.60E-01 | Sfrp4,20379:up Ednrb,13618:up Epas1,13819:up Ankrd1,107765:down Vdr,22337:down Fabp4,11770:up Vegfa,22339:down Gas6,14456:up Pparg,19016:up Tnf,21926:up Loxl2,94352:down Loxl3,16950:down Lmcd1,30937:up Fgfr1,14182:down Egfr,13649:down Hmox1,15368:up Sfrp1,20377:up Wnt5a,22418:down Ccl4,20303:up Grem1,23892:up Adipoq,11450:up Bmp4,12159:up Sfrp2,20319:up Prg4,96875:down Errfi1,74155:down Enpp1,18605:down Fgfr2,14183:up S100a1,20193:up |
| endocardial cushion morphogenesis                          | GO:0003203 | 7.97E-02 | 1.60E-01 | Tgfb2,21808:down Bmpr1a,12166:down                                                                                                                                                                                                                                                                                                                                                                                                                    |
| positive regulation of protein tyrosine kinase activity    | GO:0061098 | 7.97E-02 | 1.60E-01 | Gas6,14456:up Grem1,23892:up                                                                                                                                                                                                                                                                                                                                                                                                                          |

|                                                                       |            |          |          |                                                                                                                                                                                                                                                                                                                                                                                    |
|-----------------------------------------------------------------------|------------|----------|----------|------------------------------------------------------------------------------------------------------------------------------------------------------------------------------------------------------------------------------------------------------------------------------------------------------------------------------------------------------------------------------------|
| peptide catabolic process                                             | GO:0043171 | 7.97E-02 | 1.60E-01 | Mmp13,17386:up Anpep,16790:up                                                                                                                                                                                                                                                                                                                                                      |
| enteroendocrine cell differentiation                                  | GO:0035883 | 7.97E-02 | 1.60E-01 | Wnt5a,22418:down Bmp4,12159:up                                                                                                                                                                                                                                                                                                                                                     |
| heme metabolic process                                                | GO:0042168 | 7.97E-02 | 1.60E-01 | Hmox1,15368:up Blvrb,233016:up                                                                                                                                                                                                                                                                                                                                                     |
| activation of JUN kinase activity                                     | GO:0007257 | 7.97E-02 | 1.60E-01 | Trf,22041:up Wnt5a,22418:down                                                                                                                                                                                                                                                                                                                                                      |
| regulation of alpha-beta T cell proliferation                         | GO:0046640 | 7.97E-02 | 1.60E-01 | Ceacam1,26365:up Cd24a,12484:down                                                                                                                                                                                                                                                                                                                                                  |
| regulation of nitric-oxide synthase activity                          | GO:0050999 | 7.97E-02 | 1.60E-01 | Htr2b,15559:down Egfr,13649:down                                                                                                                                                                                                                                                                                                                                                   |
| positive regulation of calcium ion transmembrane transporter activity | GO:1901021 | 7.97E-02 | 1.60E-01 | S100a1,20193:up Bmp4,12159:up                                                                                                                                                                                                                                                                                                                                                      |
| interleukin-1 beta secretion                                          | GO:0050702 | 7.97E-02 | 1.60E-01 | Wnt5a,22418:down Ccl3,20302:up                                                                                                                                                                                                                                                                                                                                                     |
| branching involved in mammary gland duct morphogenesis                | GO:0060444 | 7.97E-02 | 1.60E-01 | Vdr,22337:down Wnt5a,22418:down                                                                                                                                                                                                                                                                                                                                                    |
| establishment or maintenance of epithelial cell apical/basal polarity | GO:0045197 | 7.97E-02 | 1.60E-01 | Ptk7,71461:down Wnt5a,22418:down                                                                                                                                                                                                                                                                                                                                                   |
| regulation of macrophage activation                                   | GO:0043030 | 7.97E-02 | 1.60E-01 | Wnt5a,22418:down Il1r1,17082:down                                                                                                                                                                                                                                                                                                                                                  |
| aminoglycan metabolic process                                         | GO:0006022 | 8.02E-02 | 1.61E-01 | Mamdc2,71738:down Chst11,58250:down Has2,15117:down Igf1,16000:up                                                                                                                                                                                                                                                                                                                  |
| somite development                                                    | GO:0061053 | 8.02E-02 | 1.61E-01 | Sfrp2,20319:up Sfrp1,20377:up Wnt5a,22418:down Bmpr1a,12166:down                                                                                                                                                                                                                                                                                                                   |
| endocrine hormone secretion                                           | GO:0060986 | 8.06E-02 | 1.62E-01 | Fgfr1,14182:down C1qtnf3,81799:down Inhba,16323:down                                                                                                                                                                                                                                                                                                                               |
| positive regulation of gliogenesis                                    | GO:0014015 | 8.06E-02 | 1.62E-01 | Pparg,19016:up Trf,22041:up Serpine2,20720:up                                                                                                                                                                                                                                                                                                                                      |
| negative regulation of cellular component organization                | GO:0051129 | 8.12E-02 | 1.63E-01 | Tnf,21926:up Plk2,20620:down Efemp1,216616:up Sfrp1,20377:up Wnt5a,22418:down Tgfb3,21814:up Dpysl3,22240:down Igf1,16000:up Bmp4,12159:up Adipoq,11450:up Sfrp2,20319:up Postn,50706:down Tgfb2,21808:down Lrrc15,74488:down Fgfr2,14183:up                                                                                                                                       |
| negative regulation of RNA biosynthetic process                       | GO:1902679 | 8.22E-02 | 1.65E-01 | Sfrp4,20379:up Ednrb,13618:up Epas1,13819:up Ankrd1,107765:down Vdr,22337:down Fabp4,11770:up Vegfa,22339:down Gas6,14456:up Pparg,19016:up Tnf,21926:up Loxl2,94352:down Loxl3,16950:down Lmcd1,30937:up Fgfr1,14182:down Hmox1,15368:up Sfrp1,20377:up Wnt5a,22418:down Ccl4,20303:up Grem1,23892:up Adipoq,11450:up Bmp4,12159:up Sfrp2,20319:up Fgfr2,14183:up S100a1,20193:up |
| negative regulation of leukocyte cell-cell adhesion                   | GO:1903038 | 8.28E-02 | 1.66E-01 | Ceacam1,26365:up Cd24a,12484:down Cxcl12,20315:up Bmp4,12159:up                                                                                                                                                                                                                                                                                                                    |
| negative regulation of developmental growth                           | GO:0048640 | 8.28E-02 | 1.66E-01 | Sfrp2,20319:up Sfrp1,20377:up Wnt5a,22418:down Bmp4,12159:up                                                                                                                                                                                                                                                                                                                       |
| interleukin-8 production                                              | GO:0032637 | 8.39E-02 | 1.67E-01 | Tnf,21926:up Wnt5a,22418:down Adipoq,11450:up                                                                                                                                                                                                                                                                                                                                      |
| negative regulation of cell division                                  | GO:0051782 | 8.39E-02 | 1.67E-01 | Susd2,71733:up Fgfr2,14183:up Bmp4,12159:up                                                                                                                                                                                                                                                                                                                                        |
| negative regulation of ERK1 and ERK2 cascade                          | GO:0070373 | 8.39E-02 | 1.67E-01 | Errfi1,74155:down Igf1,16000:up Adipoq,11450:up                                                                                                                                                                                                                                                                                                                                    |
| cell-cell junction organization                                       | GO:0045216 | 8.47E-02 | 1.67E-01 | Ceacam1,26365:up Tnf,21926:up Gpm6b,14758:up Vegfa,22339:down Tgfb2,21808:down Grem1,23892:up                                                                                                                                                                                                                                                                                      |
| negative regulation of interferon-gamma production                    | GO:0032689 | 8.51E-02 | 1.67E-01 | Gas6,14456:up Il1r1,17082:down                                                                                                                                                                                                                                                                                                                                                     |
| positive regulation of osteoclast differentiation                     | GO:0045672 | 8.51E-02 | 1.67E-01 | Tnf,21926:up Ccl3,20302:up                                                                                                                                                                                                                                                                                                                                                         |
| inositol phosphate-mediated signaling                                 | GO:0048016 | 8.51E-02 | 1.67E-01 | Lmcd1,30937:up Igf1,16000:up                                                                                                                                                                                                                                                                                                                                                       |
| antimicrobial humoral response                                        | GO:0019730 | 8.51E-02 | 1.67E-01 | Adm,11535:up Slpi,20568:up                                                                                                                                                                                                                                                                                                                                                         |
| regulation of myeloid cell apoptotic process                          | GO:0033032 | 8.51E-02 | 1.67E-01 | Kitl,17311:up Adipoq,11450:up                                                                                                                                                                                                                                                                                                                                                      |
| response to zinc ion                                                  | GO:0010043 | 8.51E-02 | 1.67E-01 | Hvcn1,74096:up Mt1,17748:up                                                                                                                                                                                                                                                                                                                                                        |
| regulation of T cell migration                                        | GO:2000404 | 8.51E-02 | 1.67E-01 | Cxcl12,20315:up Wnt5a,22418:down                                                                                                                                                                                                                                                                                                                                                   |
| acylglycerol homeostasis                                              | GO:0055090 | 8.51E-02 | 1.67E-01 | Lpl,16956:up C1qtnf3,81799:down                                                                                                                                                                                                                                                                                                                                                    |
| triglyceride homeostasis                                              | GO:0070328 | 8.51E-02 | 1.67E-01 | Lpl,16956:up C1qtnf3,81799:down                                                                                                                                                                                                                                                                                                                                                    |
| positive regulation of interleukin-1 production                       | GO:0032732 | 8.51E-02 | 1.67E-01 | Wnt5a,22418:down Ccl3,20302:up                                                                                                                                                                                                                                                                                                                                                     |



|                                                                                              |            |          |          |                                                                                                                                                                                                                                                                                                                                                                                                                                                                                                                                                                                                                                                                                                                                                                                                                                                                                                                                                                                                                                                                                                 |
|----------------------------------------------------------------------------------------------|------------|----------|----------|-------------------------------------------------------------------------------------------------------------------------------------------------------------------------------------------------------------------------------------------------------------------------------------------------------------------------------------------------------------------------------------------------------------------------------------------------------------------------------------------------------------------------------------------------------------------------------------------------------------------------------------------------------------------------------------------------------------------------------------------------------------------------------------------------------------------------------------------------------------------------------------------------------------------------------------------------------------------------------------------------------------------------------------------------------------------------------------------------|
| cellular component morphogenesis                                                             | GO:0032989 | 8.52E-02 | 1.67E-01 | Fam101b,76566:down Flrt2,399558:down Lama2,16773:down Plxnd1,67784:up Ccl2,20296:up Ccl3,20302:up Sema7a,20361:down Tnfrsf12a,27279:down Vdr,22337:down Cxcl12,20315:up Postn,50706:down Vegfa,22339:down Loxl2,94352:down Loxl3,16950:down Egfr,13649:down Sfrp1,20377:up Has2,15117:down Wnt5a,22418:down Ccl12,20293:up Tgfb3,21814:up Stc1,20855:up Grem1,23892:up Bmp4,12159:up Sfrp2,20319:up Crabp2,12904:down Ret,19713:up Tgfb2,21808:down Fgfr2,14183:up                                                                                                                                                                                                                                                                                                                                                                                                                                                                                                                                                                                                                              |
| regulation of cellular biosynthetic process                                                  | GO:0031326 | 8.53E-02 | 1.67E-01 | Fstl3,83554:down Adm,11535:up Tfec,21426:up Sfrp4,20379:up C3,12266:up Ankrd1,107765:down Lyl1,17095:up Loxl2,94352:down Loxl3,16950:down Trf,22041:up Wnt5a,22418:down Adipoq,11450:up Bmp4,12159:up Igf1,16000:up Ptgir,19222:up Fgfr2,14183:up Htr2b,15559:down Prl2c2,18811:up Efemp1,21661:up Vdr,22337:down Fabp4,11770:up Htr2a,15558:down Slc40a1,53945:up Gas6,14456:up Egfr,13649:down Sfrp1,20377:up C1qtnf3,81799:down Tgfb3,21814:up Sfrp2,20319:up Npnt,114249:up S100a1,20193:up Igf1,16000:down Ednrb,13618:up Pdgfc,54635:down Epas1,13819:up Uchl5,56207:up Htra3,78558:down Ddah1,69219:down Sdpr,20324:down Ptx3,19288:up Akr1c18,105349:up Bmpr1a,12166:down Ccl4,20303:up Ret,19713:up Prg4,96875:down Plpp3,67916:up Creb3l1,26427:down Kitl,17311:up Rasl11a,68895:up Inhba,16323:down Bnc2,242509:down Ccl3,20302:up Vegfa,22339:down Igf2,16002:up Tnf,21926:up Pparg,19016:up Lmcd1,30937:up Glp1r,14652:down Fgfr1,14182:down Hmox1,15368:up Sulf1,240725:down Ptgs2,19225:down Grem1,23892:up Phf11d,219132:up Tbx15,21384:down Enpp1,18605:down Errfi1,74155:down |
| cell killing                                                                                 | GO:0019006 | 8.54E-02 | 1.67E-01 | Ceacam1,26365:up Clec2d,93694:up Ccl2,20296:up Igf2,16002:up                                                                                                                                                                                                                                                                                                                                                                                                                                                                                                                                                                                                                                                                                                                                                                                                                                                                                                                                                                                                                                    |
| renal tubule development                                                                     | GO:0061326 | 8.54E-02 | 1.67E-01 | Vegfa,22339:down Npnt,114249:up Grem1,23892:up Bmp4,12159:up                                                                                                                                                                                                                                                                                                                                                                                                                                                                                                                                                                                                                                                                                                                                                                                                                                                                                                                                                                                                                                    |
| positive regulation of hemopoiesis                                                           | GO:1903708 | 8.66E-02 | 1.67E-01 | Tnf,21926:up Gas6,14456:up Inhba,16323:down Ccl3,20302:up Tnfsf9,21950:up Kitl,17311:up                                                                                                                                                                                                                                                                                                                                                                                                                                                                                                                                                                                                                                                                                                                                                                                                                                                                                                                                                                                                         |
| organophosphate catabolic process                                                            | GO:0046434 | 8.70E-02 | 1.67E-01 | Htr2a,15558:down Enpp1,18605:down Enpp3,209558:down Enpp5,83965:up Igf1,16000:up                                                                                                                                                                                                                                                                                                                                                                                                                                                                                                                                                                                                                                                                                                                                                                                                                                                                                                                                                                                                                |
| positive regulation of B cell apoptotic process                                              | GO:0002904 | 8.72E-02 | 1.67E-01 | Cd24a,12484:down                                                                                                                                                                                                                                                                                                                                                                                                                                                                                                                                                                                                                                                                                                                                                                                                                                                                                                                                                                                                                                                                                |
| atrial septum primum morphogenesis                                                           | GO:0003289 | 8.72E-02 | 1.67E-01 | Tgfb2,21808:down                                                                                                                                                                                                                                                                                                                                                                                                                                                                                                                                                                                                                                                                                                                                                                                                                                                                                                                                                                                                                                                                                |
| bone marrow development                                                                      | GO:0048539 | 8.72E-02 | 1.67E-01 | Lrrc17,74511:down                                                                                                                                                                                                                                                                                                                                                                                                                                                                                                                                                                                                                                                                                                                                                                                                                                                                                                                                                                                                                                                                               |
| mammary gland branching involved in pregnancy                                                | GO:0060745 | 8.72E-02 | 1.67E-01 | Vdr,22337:down                                                                                                                                                                                                                                                                                                                                                                                                                                                                                                                                                                                                                                                                                                                                                                                                                                                                                                                                                                                                                                                                                  |
| ureter smooth muscle cell differentiation                                                    | GO:0072193 | 8.72E-02 | 1.67E-01 | Bmp4,12159:up                                                                                                                                                                                                                                                                                                                                                                                                                                                                                                                                                                                                                                                                                                                                                                                                                                                                                                                                                                                                                                                                                   |
| positive regulation of MAPKKK cascade by fibroblast growth factor receptor signaling pathway | GO:0090080 | 8.72E-02 | 1.67E-01 | Fgfr1,14182:down                                                                                                                                                                                                                                                                                                                                                                                                                                                                                                                                                                                                                                                                                                                                                                                                                                                                                                                                                                                                                                                                                |
| negative regulation of hair follicle development                                             | GO:0051799 | 8.72E-02 | 1.67E-01 | Inhba,16323:down                                                                                                                                                                                                                                                                                                                                                                                                                                                                                                                                                                                                                                                                                                                                                                                                                                                                                                                                                                                                                                                                                |
| positive regulation of protein kinase A signaling                                            | GO:0010739 | 8.72E-02 | 1.67E-01 | Adipoq,11450:up                                                                                                                                                                                                                                                                                                                                                                                                                                                                                                                                                                                                                                                                                                                                                                                                                                                                                                                                                                                                                                                                                 |
| positive regulation of integrin activation                                                   | GO:0033625 | 8.72E-02 | 1.67E-01 | Cd24a,12484:down                                                                                                                                                                                                                                                                                                                                                                                                                                                                                                                                                                                                                                                                                                                                                                                                                                                                                                                                                                                                                                                                                |
| 9-cis-retinoic acid metabolic process                                                        | GO:0042905 | 8.72E-02 | 1.67E-01 | Aldh1a2,19378:up                                                                                                                                                                                                                                                                                                                                                                                                                                                                                                                                                                                                                                                                                                                                                                                                                                                                                                                                                                                                                                                                                |
| regulation of inorganic anion transmembrane transport                                        | GO:1903795 | 8.72E-02 | 1.67E-01 | Fxyd1,56188:up                                                                                                                                                                                                                                                                                                                                                                                                                                                                                                                                                                                                                                                                                                                                                                                                                                                                                                                                                                                                                                                                                  |
| positive regulation of nuclear cell cycle DNA replication                                    | GO:0010571 | 8.72E-02 | 1.67E-01 | Fgfr1,14182:down                                                                                                                                                                                                                                                                                                                                                                                                                                                                                                                                                                                                                                                                                                                                                                                                                                                                                                                                                                                                                                                                                |
| endocardial cushion to mesenchymal transition                                                | GO:0090500 | 8.72E-02 | 1.67E-01 | Has2,15117:down                                                                                                                                                                                                                                                                                                                                                                                                                                                                                                                                                                                                                                                                                                                                                                                                                                                                                                                                                                                                                                                                                 |
| negative regulation of hydrogen peroxide metabolic process                                   | GO:0010727 | 8.72E-02 | 1.67E-01 | Hp,15439:up                                                                                                                                                                                                                                                                                                                                                                                                                                                                                                                                                                                                                                                                                                                                                                                                                                                                                                                                                                                                                                                                                     |
| osteoclast fusion                                                                            | GO:0072675 | 8.72E-02 | 1.67E-01 | Cd109,235505:down                                                                                                                                                                                                                                                                                                                                                                                                                                                                                                                                                                                                                                                                                                                                                                                                                                                                                                                                                                                                                                                                               |
| positive regulation of retinoic acid receptor signaling pathway                              | GO:0048386 | 8.72E-02 | 1.67E-01 | Aldh1a3,56847:down                                                                                                                                                                                                                                                                                                                                                                                                                                                                                                                                                                                                                                                                                                                                                                                                                                                                                                                                                                                                                                                                              |
| positive regulation of brown fat cell differentiation                                        | GO:0090336 | 8.72E-02 | 1.67E-01 | Ptgs2,19225:down                                                                                                                                                                                                                                                                                                                                                                                                                                                                                                                                                                                                                                                                                                                                                                                                                                                                                                                                                                                                                                                                                |
| skeletal muscle satellite cell maintenance involved in skeletal muscle regeneration          | GO:0014834 | 8.72E-02 | 1.67E-01 | Igf1,16000:up                                                                                                                                                                                                                                                                                                                                                                                                                                                                                                                                                                                                                                                                                                                                                                                                                                                                                                                                                                                                                                                                                   |
| regulation of mast cell chemotaxis                                                           | GO:0060753 | 8.72E-02 | 1.67E-01 | Figf,14205:up                                                                                                                                                                                                                                                                                                                                                                                                                                                                                                                                                                                                                                                                                                                                                                                                                                                                                                                                                                                                                                                                                   |
| negative regulation by host of viral genome replication                                      | GO:0044828 | 8.72E-02 | 1.67E-01 | Ceacam1,26365:up                                                                                                                                                                                                                                                                                                                                                                                                                                                                                                                                                                                                                                                                                                                                                                                                                                                                                                                                                                                                                                                                                |

|                                                                                      |            |          |          |                    |
|--------------------------------------------------------------------------------------|------------|----------|----------|--------------------|
| serotonin uptake                                                                     | GO:0051610 | 8.72E-02 | 1.67E-01 | Gpm6b,14758:up     |
| negative regulation of tumor necrosis factor biosynthetic process                    | GO:0042536 | 8.72E-02 | 1.67E-01 | Errfi1,74155:down  |
| regulation of cardiac muscle adaptation                                              | GO:0010612 | 8.72E-02 | 1.67E-01 | Errfi1,74155:down  |
| negative regulation of cytokine secretion involved in immune response                | GO:0002740 | 8.72E-02 | 1.67E-01 | Tnf,21926:up       |
| urinary bladder development                                                          | GO:0060157 | 8.72E-02 | 1.67E-01 | Wnt5a,22418:down   |
| positive regulation of cell proliferation involved in heart morphogenesis            | GO:2000138 | 8.72E-02 | 1.67E-01 | Bmp4,12159:up      |
| modulation of molecular function in other organism involved in symbiotic interaction | GO:0052205 | 8.72E-02 | 1.67E-01 | Ptx3,19288:up      |
| apoptotic process in bone marrow                                                     | GO:0071839 | 8.72E-02 | 1.67E-01 | Fgfr2,14183:up     |
| positive regulation of alkaline phosphatase activity                                 | GO:0010694 | 8.72E-02 | 1.67E-01 | Npnt,114249:up     |
| ureter smooth muscle development                                                     | GO:0072191 | 8.72E-02 | 1.67E-01 | Bmp4,12159:up      |
| T cell homeostatic proliferation                                                     | GO:0001777 | 8.72E-02 | 1.67E-01 | Cd24a,12484:down   |
| parathyroid hormone secretion                                                        | GO:0035898 | 8.72E-02 | 1.67E-01 | Fgfr1,14182:down   |
| cell migration involved in kidney development                                        | GO:0035787 | 8.72E-02 | 1.67E-01 | Adipoq,11450:up    |
| positive regulation of branching involved in lung morphogenesis                      | GO:0061047 | 8.72E-02 | 1.67E-01 | Bmp4,12159:up      |
| regulation of secondary metabolite biosynthetic process                              | GO:1900376 | 8.72E-02 | 1.67E-01 | Wnt5a,22418:down   |
| pulmonary artery morphogenesis                                                       | GO:0061156 | 8.72E-02 | 1.67E-01 | Bmp4,12159:up      |
| ferrous iron import                                                                  | GO:0070627 | 8.72E-02 | 1.67E-01 | Trf,22041:up       |
| positive regulation of histone deacetylase activity                                  | GO:1901727 | 8.72E-02 | 1.67E-01 | Vegfa,22339:down   |
| vascular wound healing                                                               | GO:0061042 | 8.72E-02 | 1.67E-01 | Hpse,15442:up      |
| negative regulation of monocyte chemotaxis                                           | GO:0090027 | 8.72E-02 | 1.67E-01 | Grem1,23892:up     |
| direct ossification                                                                  | GO:0036072 | 8.72E-02 | 1.67E-01 | Mmp2,17390:down    |
| nitrate metabolic process                                                            | GO:0042126 | 8.72E-02 | 1.67E-01 | Marc1,66112:up     |
| positive regulation of CD8-positive, alpha-beta T cell activation                    | GO:2001187 | 8.72E-02 | 1.67E-01 | Ceacam1,26365:up   |
| negative regulation of serotonin secretion                                           | GO:0014063 | 8.72E-02 | 1.67E-01 | Maob,109731:up     |
| negative regulation of molecular function in other organism                          | GO:0044362 | 8.72E-02 | 1.67E-01 | Ptx3,19288:up      |
| regulation of melanin biosynthetic process                                           | GO:0048021 | 8.72E-02 | 1.67E-01 | Wnt5a,22418:down   |
| positive regulation of cardioblast differentiation                                   | GO:0051891 | 8.72E-02 | 1.67E-01 | Tgfb2,21808:down   |
| mesenchymal cell proliferation involved in lung development                          | GO:0060916 | 8.72E-02 | 1.67E-01 | Fgfr2,14183:up     |
| S-shaped body morphogenesis                                                          | GO:0072050 | 8.72E-02 | 1.67E-01 | Bmp4,12159:up      |
| NADH oxidation                                                                       | GO:0006116 | 8.72E-02 | 1.67E-01 | Cbr2,12409:up      |
| intramembranous ossification                                                         | GO:0001957 | 8.72E-02 | 1.67E-01 | Mmp2,17390:down    |
| extracellular matrix constituent secretion                                           | GO:0070278 | 8.72E-02 | 1.67E-01 | Creb3l1,26427:down |

|                                                                                                                                    |            |          |          |                     |
|------------------------------------------------------------------------------------------------------------------------------------|------------|----------|----------|---------------------|
| negative regulation of glycogen biosynthetic process                                                                               | GO:0045719 | 8.72E-02 | 1.67E-01 | Enpp1,18605:down    |
| mast cell apoptotic process                                                                                                        | GO:0033024 | 8.72E-02 | 1.67E-01 | Kitl,17311:up       |
| negative regulation of myosin-light-chain-phosphatase activity                                                                     | GO:0035509 | 8.72E-02 | 1.67E-01 | Tnf,21926:up        |
| positive regulation of hyaluronan biosynthetic process                                                                             | GO:1900127 | 8.72E-02 | 1.67E-01 | Has2,15117:down     |
| epithelial cell proliferation involved in mammary gland duct elongation                                                            | GO:0060750 | 8.72E-02 | 1.67E-01 | Wnt5a,22418:down    |
| cell proliferation involved in outflow tract morphogenesis                                                                         | GO:0061325 | 8.72E-02 | 1.67E-01 | Bmp4,12159:up       |
| tricuspid valve morphogenesis                                                                                                      | GO:0003186 | 8.72E-02 | 1.67E-01 | Bmpr1a,12166:down   |
| positive regulation of cell proliferation in bone marrow                                                                           | GO:0071864 | 8.72E-02 | 1.67E-01 | Fgfr2,14183:up      |
| branch elongation involved in ureteric bud branching                                                                               | GO:0060681 | 8.72E-02 | 1.67E-01 | Bmp4,12159:up       |
| negative regulation of hepatocyte proliferation                                                                                    | GO:2000346 | 8.72E-02 | 1.67E-01 | Ceacam1,26365:up    |
| mast cell homeostasis                                                                                                              | GO:0033023 | 8.72E-02 | 1.67E-01 | Kitl,17311:up       |
| negative regulation of oocyte development                                                                                          | GO:0060283 | 8.72E-02 | 1.67E-01 | Igf1,16000:up       |
| negative regulation of immature T cell proliferation in thymus                                                                     | GO:0033088 | 8.72E-02 | 1.67E-01 | Bmp4,12159:up       |
| negative regulation of molecular function in other organism involved in symbiotic interaction                                      | GO:0052204 | 8.72E-02 | 1.67E-01 | Ptx3,19288:up       |
| positive regulation of neuron maturation                                                                                           | GO:0014042 | 8.72E-02 | 1.67E-01 | Ret,19713:up        |
| modulation of molecular function in other organism                                                                                 | GO:0044359 | 8.72E-02 | 1.67E-01 | Ptx3,19288:up       |
| creatine metabolic process                                                                                                         | GO:0006600 | 8.72E-02 | 1.67E-01 | Gatm,67092:down     |
| iron ion transmembrane transport                                                                                                   | GO:0034755 | 8.72E-02 | 1.67E-01 | Slc40a1,53945:up    |
| negative regulation of cellular response to vascular endothelial growth factor stimulus                                            | GO:1902548 | 8.72E-02 | 1.67E-01 | Adams12,239337:down |
| positive regulation of transcription from RNA polymerase II promoter in response to hypoxia                                        | GO:0061419 | 8.72E-02 | 1.67E-01 | Vegfa,22339:down    |
| pyrimidine nucleoside monophosphate biosynthetic process                                                                           | GO:0009130 | 8.72E-02 | 1.67E-01 | Uck2,80914:down     |
| neural crest formation                                                                                                             | GO:0014029 | 8.72E-02 | 1.67E-01 | Sfrp1,20377:up      |
| dichotomous subdivision of terminal units involved in salivary gland branching                                                     | GO:0060666 | 8.72E-02 | 1.67E-01 | Plxnd1,67784:up     |
| positive regulation of endothelial cell chemotaxis by VEGF-activated vascular endothelial growth factor receptor signaling pathway | GO:0038033 | 8.72E-02 | 1.67E-01 | Vegfa,22339:down    |

|                                                                                  |            |          |          |                                                                 |
|----------------------------------------------------------------------------------|------------|----------|----------|-----------------------------------------------------------------|
| canonical Wnt signaling pathway involved in regulation of cell proliferation     | GO:0044340 | 8.72E-02 | 1.67E-01 | Sfrp1,20377:up                                                  |
| BMP signaling pathway involved in heart development                              | GO:0061312 | 8.72E-02 | 1.67E-01 | Bmp4,12159:up                                                   |
| sclerotome development                                                           | GO:0061056 | 8.72E-02 | 1.67E-01 | Sfrp2,20319:up                                                  |
| negative regulation of fibroblast growth factor production                       | GO:0090272 | 8.72E-02 | 1.67E-01 | Fgfr1,14182:down                                                |
| negative regulation of synaptic transmission, dopaminergic                       | GO:0032227 | 8.72E-02 | 1.67E-01 | Ptgs2,19225:down                                                |
| cellular response to nicotine                                                    | GO:0071316 | 8.72E-02 | 1.67E-01 | Tnf,21926:up                                                    |
| positive regulation of fibroblast apoptotic process                              | GO:2000271 | 8.72E-02 | 1.67E-01 | Sfrp1,20377:up                                                  |
| purine nucleotide salvage                                                        | GO:0032261 | 8.72E-02 | 1.67E-01 | Ampd3,11717:up                                                  |
| negative regulation of sequestering of triglyceride                              | GO:0010891 | 8.72E-02 | 1.67E-01 | Pparg,19016:up                                                  |
| positive regulation of store-operated calcium channel activity                   | GO:1901341 | 8.72E-02 | 1.67E-01 | Bmp4,12159:up                                                   |
| positive regulation of neuroepithelial cell differentiation                      | GO:1902913 | 8.72E-02 | 1.67E-01 | Kitl,17311:up                                                   |
| regulation of integrin biosynthetic process                                      | GO:0045113 | 8.72E-02 | 1.67E-01 | Tgfb2,21808:down                                                |
| regulation of cell proliferation in bone marrow                                  | GO:0071863 | 8.72E-02 | 1.67E-01 | Fgfr2,14183:up                                                  |
| regulation of mast cell apoptotic process                                        | GO:0033025 | 8.72E-02 | 1.67E-01 | Kitl,17311:up                                                   |
| 9-cis-retinoic acid biosynthetic process                                         | GO:0042904 | 8.72E-02 | 1.67E-01 | Aldh1a2,19378:up                                                |
| negative regulation of cell proliferation involved in kidney development         | GO:1901723 | 8.72E-02 | 1.67E-01 | Bmp4,12159:up                                                   |
| intestine smooth muscle contraction                                              | GO:0014827 | 8.72E-02 | 1.67E-01 | Htr2b,15559:down                                                |
| regulation of CD4-positive, alpha-beta T cell proliferation                      | GO:2000561 | 8.72E-02 | 1.67E-01 | Ceacam1,26365:up                                                |
| histidine catabolic process                                                      | GO:0006548 | 8.72E-02 | 1.67E-01 | Hal,15109:up                                                    |
| CD4-positive, alpha-beta T cell proliferation                                    | GO:0035739 | 8.72E-02 | 1.67E-01 | Ceacam1,26365:up                                                |
| thelarche                                                                        | GO:0042695 | 8.72E-02 | 1.67E-01 | Wnt5a,22418:down                                                |
| mammary gland branching involved in thelarche                                    | GO:0060744 | 8.72E-02 | 1.67E-01 | Wnt5a,22418:down                                                |
| terpenoid catabolic process                                                      | GO:0016115 | 8.72E-02 | 1.67E-01 | Akr1c18,105349:up                                               |
| nephric duct formation                                                           | GO:0072179 | 8.72E-02 | 1.67E-01 | Bmp4,12159:up                                                   |
| monocyte aggregation                                                             | GO:0070487 | 8.72E-02 | 1.67E-01 | Has2,15117:down                                                 |
| positive regulation of chronic inflammatory response                             | GO:0002678 | 8.72E-02 | 1.67E-01 | Tnf,21926:up                                                    |
| positive regulation of phosphatidylinositol 3-kinase signaling                   | GO:0014068 | 8.74E-02 | 1.67E-01 | Tgfb2,21808:down Pdgfc,54635:down Igf1,16000:up                 |
| activation of cysteine-type endopeptidase activity involved in apoptotic process | GO:0006919 | 8.74E-02 | 1.67E-01 | Tnf,21926:up Pparg,19016:up F3,14066:up                         |
| regulation of cytokine biosynthetic process                                      | GO:0042035 | 8.80E-02 | 1.68E-01 | Tnf,21926:up Prg4,96875:down Wnt5a,22418:down Errfi1,74155:down |
| interleukin-6 secretion                                                          | GO:0072604 | 9.05E-02 | 1.72E-01 | Gas6,14456:up C1qtnf3,81799:down                                |

|                                                                |            |          |          |                                                                                                                                                                                                                                        |
|----------------------------------------------------------------|------------|----------|----------|----------------------------------------------------------------------------------------------------------------------------------------------------------------------------------------------------------------------------------------|
| negative regulation of amine transport                         | GO:0051953 | 9.05E-02 | 1.72E-01 | Tnf,21926:up Il1rn,16181:up                                                                                                                                                                                                            |
| positive regulation of cytokine-mediated signaling pathway     | GO:001961  | 9.05E-02 | 1.72E-01 | Gas6,14456:up Wnt5a,22418:down                                                                                                                                                                                                         |
| positive regulation of response to cytokine stimulus           | GO:0060760 | 9.05E-02 | 1.72E-01 | Gas6,14456:up Wnt5a,22418:down                                                                                                                                                                                                         |
| hair follicle morphogenesis                                    | GO:0031069 | 9.05E-02 | 1.72E-01 | Tgfb2,21808:down Fgfr2,14183:up                                                                                                                                                                                                        |
| prostaglandin metabolic process                                | GO:0006693 | 9.05E-02 | 1.72E-01 | Hpgd,15446:up Ptgs2,19225:down                                                                                                                                                                                                         |
| prostanoid metabolic process                                   | GO:0006692 | 9.05E-02 | 1.72E-01 | Hpgd,15446:up Ptgs2,19225:down                                                                                                                                                                                                         |
| response to interferon-beta                                    | GO:0035456 | 9.05E-02 | 1.72E-01 | Ifit1,15957:up Ifit3,15959:up                                                                                                                                                                                                          |
| motor neuron axon guidance                                     | GO:0008045 | 9.05E-02 | 1.72E-01 | Plxnd1,67784:up Cxcl12,20315:up                                                                                                                                                                                                        |
| protein processing                                             | GO:0016485 | 9.07E-02 | 1.73E-01 | Tnf,21926:up Pparg,19016:up C3,12266:up Plat,18791:down Ctla2a,13024:down Serping1,12258:up Serpine2,20720:up F3,14066:up                                                                                                              |
| regulation of calcium ion import                               | GO:0090279 | 9.07E-02 | 1.73E-01 | Cxcl12,20315:up Tgfb2,21808:down Ccl12,20293:up Stc1,20855:up                                                                                                                                                                          |
| cerebral cortex development                                    | GO:0021987 | 9.07E-02 | 1.73E-01 | Fgfr1,14182:down Egfr,13649:down Cx3cr1,13051:down Col3a1,12825:down                                                                                                                                                                   |
| negative regulation of leukocyte activation                    | GO:0002695 | 9.14E-02 | 1.74E-01 | Ceacam1,26365:up Cd24a,12484:down Sfrp1,20377:up Hmox1,15368:up Bmp4,12159:up                                                                                                                                                          |
| nucleoside phosphate metabolic process                         | GO:0006753 | 9.22E-02 | 1.75E-01 | Htr2b,15559:down Adm,11535:up Wnt5a,22418:down Ampd3,11717:up Enpp5,83965:up Igf1,16000:up Vegfa,22339:down Gfpt2,14584:down Htr2a,15558:down Cbr2,12409:up Ptgir,19222:up Uck2,80914:down Enpp1,18605:down Enpp3,209558:down          |
| female gamete generation                                       | GO:0007292 | 9.34E-02 | 1.77E-01 | Inhba,16323:down Ptgs2,19225:down Plat,18791:down Igf1,16000:up                                                                                                                                                                        |
| steroid biosynthetic process                                   | GO:0006694 | 9.37E-02 | 1.78E-01 | Vdr,22337:down Tnf,21926:up Akr1c18,105349:up Igf2,16002:up Igf1,16000:up                                                                                                                                                              |
| cell division                                                  | GO:0051301 | 9.41E-02 | 1.79E-01 | Htr2b,15559:down Tnf,21926:up Fgfr1,14182:down Wnt5a,22418:down Susd2,71733:up Pdgfc,54635:down Figf,14205:up Igf1,16000:up Bmp4,12159:up Sfrp2,20319:up Vegfa,22339:down Tgfb2,21808:down Vegfb,22340:up Fgfr2,14183:up Igf2,16002:up |
| monocarboxylic acid biosynthetic process                       | GO:0072330 | 9.43E-02 | 1.79E-01 | Ggt5,23887:up Akr1c18,105349:up Lpl,16956:up Aldh1a2,19378:up Aldh1a3,56847:down Ptgs2,19225:down                                                                                                                                      |
| regulation of purine nucleotide metabolic process              | GO:1900542 | 9.43E-02 | 1.79E-01 | Adm,11535:up Wnt5a,22418:down Vegfa,22339:down Htr2a,15558:down Ptgir,19222:up Igf1,16000:up                                                                                                                                           |
| long-term synaptic potentiation                                | GO:0060291 | 9.45E-02 | 1.79E-01 | Plk2,20620:down Cx3cr1,13051:down Serpine2,20720:up                                                                                                                                                                                    |
| response to cocaine                                            | GO:0042220 | 9.61E-02 | 1.82E-01 | Ncam1,17967:down Htr2a,15558:down                                                                                                                                                                                                      |
| embryonic hindlimb morphogenesis                               | GO:0035116 | 9.61E-02 | 1.82E-01 | Rspo2,239405:up Bmp4,12159:up                                                                                                                                                                                                          |
| epithelial cell differentiation involved in kidney development | GO:0035850 | 9.61E-02 | 1.82E-01 | Bmp4,12159:up Adipoq,11450:up                                                                                                                                                                                                          |
| positive regulation of smooth muscle contraction               | GO:0045987 | 9.61E-02 | 1.82E-01 | Ptgs2,19225:down Npnt,114249:up                                                                                                                                                                                                        |
| response to pain                                               | GO:0048265 | 9.61E-02 | 1.82E-01 | Ret,19713:up Ednrb,13618:up                                                                                                                                                                                                            |
| regulation of heart morphogenesis                              | GO:2000826 | 9.61E-02 | 1.82E-01 | Tgfb2,21808:down Bmp4,12159:up                                                                                                                                                                                                         |
| negative regulation of lymphocyte proliferation                | GO:0050672 | 9.81E-02 | 1.85E-01 | Ceacam1,26365:up Cd24a,12484:down Bmp4,12159:up                                                                                                                                                                                        |
| negative regulation of mononuclear cell proliferation          | GO:0032945 | 9.81E-02 | 1.85E-01 | Ceacam1,26365:up Cd24a,12484:down Bmp4,12159:up                                                                                                                                                                                        |
| cell-substrate adherens junction assembly                      | GO:0007045 | 9.81E-02 | 1.85E-01 | Gpm6b,14758:up Vegfa,22339:down Grem1,23892:up                                                                                                                                                                                         |
| focal adhesion assembly                                        | GO:0048041 | 9.81E-02 | 1.85E-01 | Gpm6b,14758:up Vegfa,22339:down Grem1,23892:up                                                                                                                                                                                         |
| positive regulation of interferon-gamma production             | GO:0032729 | 9.81E-02 | 1.85E-01 | Tnf,21926:up Wnt5a,22418:down Tnfsf9,21950:up                                                                                                                                                                                          |
| amide transport                                                | GO:0042886 | 9.81E-02 | 1.85E-01 | Tnf,21926:up Pparg,19016:up Glp1r,14652:down Egfr,13649:down Sfrp1,20377:up C1qtnf3,81799:down Ptgs2,19225:down Il1rn,16181:up Grem1,23892:up                                                                                          |
| central nervous system neuron differentiation                  | GO:0021953 | 9.82E-02 | 1.85E-01 | Sfrp2,20319:up Fgfr1,14182:down Sfrp1,20377:up Wnt5a,22418:down Inhba,16323:down Fgfr2,14183:up                                                                                                                                        |
| positive regulation of leukocyte differentiation               | GO:1902107 | 9.83E-02 | 1.85E-01 | Tnf,21926:up Gas6,14456:up Ccl3,20302:up Tnfsf9,21950:up Kitl,17311:up                                                                                                                                                                 |

|                                                                        |            |          |          |                                                                                                                                                                                                                                                                                                                                                                                                                                                                                                                                                                                                                                                                                                                                                                                                                                                                                                                                                                                                                                                                                                                                                                                                                                                                                                                                                                                                                                                                                                                                                                                                                                                  |
|------------------------------------------------------------------------|------------|----------|----------|--------------------------------------------------------------------------------------------------------------------------------------------------------------------------------------------------------------------------------------------------------------------------------------------------------------------------------------------------------------------------------------------------------------------------------------------------------------------------------------------------------------------------------------------------------------------------------------------------------------------------------------------------------------------------------------------------------------------------------------------------------------------------------------------------------------------------------------------------------------------------------------------------------------------------------------------------------------------------------------------------------------------------------------------------------------------------------------------------------------------------------------------------------------------------------------------------------------------------------------------------------------------------------------------------------------------------------------------------------------------------------------------------------------------------------------------------------------------------------------------------------------------------------------------------------------------------------------------------------------------------------------------------|
| single organism reproductive process                                   | GO:0044702 | 9.89E-02 | 1.87E-01 | Adm,11535:up Inhba,16323:down Gjb5,14622:down Ednrb,13618:up Plat,18791:down Epas1,13819:up Vdr,22337:down Cxcl12,20315:up Vegfa,22339:down Mmp2,17390:down Serpine2,20720:up Pparg,19016:up Egfr,13649:down Sfrp1,20377:up Sulf1,240725:down Wnt5a,22418:down Bmpr1a,12166:down Ptgs2,19225:down Bmp4,12159:up Igf1,16000:up Sfrp2,20319:up Tnc,21923:down Fgfr2,14183:up Kitl,17311:up                                                                                                                                                                                                                                                                                                                                                                                                                                                                                                                                                                                                                                                                                                                                                                                                                                                                                                                                                                                                                                                                                                                                                                                                                                                         |
| cellular component organization                                        | GO:0016043 | 1.00E-01 | 1.89E-01 | Igfbp4,16010:up Adm,11535:up Flrt2,399558:down Plxnd1,67784:up Sfrp4,20379:up C3,12266:up Ankrd1,107765:down Ltbp2,16997:down Serpinh1,12406:down Igfbp3,16009:up Ibsp,15891:up Loxl2,94352:down Plk2,20620:down Loxl3,16950:down Trf,22041:up Cd24a,12484:down Wnt5a,22418:down Mark1,226778:up Stc1,20855:up Adipoq,11450:up Bmp4,12159:up Igf1,16000:up Crabp2,12904:down Cxcl9,17329:up Tgfb2,21808:down Hps,15442:up Fgfr2,14183:up Thbs2,21826:down Cthrc1,68588:down Prl2c2,18811:up Efemp1,216616:up Dpysl3,22240:down Vdr,22337:down Cxcl12,20315:up Mmp2,17390:down Smoc2,64074:down Gas6,14456:up Egfr,13649:down Col11a1,12814:down Sfrp1,20377:up C1qtnf3,81799:down Tgfb3,21814:up Sncg,20618:up Ceacam1,26365:up Ccl8,20307:up Sfrp2,20319:up Pxdn,69675:down Npnt,114249:up Tnfrsf11b,18383:up Sytl3,80976:up Col5a2,12832:down Iccl1,218333:down Ccl2,20296:up Pdzn3,55983:down Pdgfr,54635:down Mgp,17313:up Mmp13,17386:up Sema7a,20361:down Epas1,13819:up Htra3,78558:down Tnfrsf12a,27279:down Gpm6b,14758:up Shroom4,208431:down Postn,50706:down Ptx3,19288:up Ncam1,17967:down Ccl12,20293:up Wisp1,22402:down Tnc,21923:down Ret,19713:up Creb3l1,26427:down Fam101b,76566:down P4ha1,18451:down Lama2,16773:down Ptk7,71461:down Inhba,16323:down Ccl3,20302:up Srxp2,68792:down Plod2,26432:down Vegfa,22339:down Cbr2,12409:up Serpine2,20720:up Lrrc15,74488:down Igf2,16002:up Pparg,19016:up Tnf,21926:up Lmcd1,30937:up Col1a2,12843:down Fgfr1,14182:down Lpl,16956:up Hmox1,15368:up Has2,15117:down Sulf1,240725:down C1qtnf6,72709:down Grem1,23892:up Col3a1,12825:down Col5a1,12831:down Enpp1,18605:down |
| steroid hormone mediated signaling pathway                             | GO:0043401 | 1.01E-01 | 1.89E-01 | Vdr,22337:down Pparg,19016:up Sfrp1,20377:up Igf1,16000:up Bmp4,12159:up                                                                                                                                                                                                                                                                                                                                                                                                                                                                                                                                                                                                                                                                                                                                                                                                                                                                                                                                                                                                                                                                                                                                                                                                                                                                                                                                                                                                                                                                                                                                                                         |
| regulation of cellular ketone metabolic process                        | GO:0010565 | 1.01E-01 | 1.89E-01 | Pparg,19016:up Akr1c18,105349:up Fam132b,227358:down C1qtnf3,81799:down Adipoq,11450:up                                                                                                                                                                                                                                                                                                                                                                                                                                                                                                                                                                                                                                                                                                                                                                                                                                                                                                                                                                                                                                                                                                                                                                                                                                                                                                                                                                                                                                                                                                                                                          |
| myotube differentiation                                                | GO:0014902 | 1.02E-01 | 1.89E-01 | Ccl8,20307:up Cxcl9,17329:up Cxcl12,20315:up Igf1,16000:up                                                                                                                                                                                                                                                                                                                                                                                                                                                                                                                                                                                                                                                                                                                                                                                                                                                                                                                                                                                                                                                                                                                                                                                                                                                                                                                                                                                                                                                                                                                                                                                       |
| positive regulation of cellular carbohydrate metabolic process         | GO:0010676 | 1.02E-01 | 1.89E-01 | Htra2a,15558:down Igf2,16002:up Igf1,16000:up                                                                                                                                                                                                                                                                                                                                                                                                                                                                                                                                                                                                                                                                                                                                                                                                                                                                                                                                                                                                                                                                                                                                                                                                                                                                                                                                                                                                                                                                                                                                                                                                    |
| hexose biosynthetic process                                            | GO:0019319 | 1.02E-01 | 1.89E-01 | Sord,20322:up C1qtnf3,81799:down Adipoq,11450:up                                                                                                                                                                                                                                                                                                                                                                                                                                                                                                                                                                                                                                                                                                                                                                                                                                                                                                                                                                                                                                                                                                                                                                                                                                                                                                                                                                                                                                                                                                                                                                                                 |
| catecholamine transport                                                | GO:0051937 | 1.02E-01 | 1.89E-01 | Cxcl12,20315:up Htra2a,15558:down Sncg,20618:up                                                                                                                                                                                                                                                                                                                                                                                                                                                                                                                                                                                                                                                                                                                                                                                                                                                                                                                                                                                                                                                                                                                                                                                                                                                                                                                                                                                                                                                                                                                                                                                                  |
| regulation of neuron migration                                         | GO:0010122 | 1.02E-01 | 1.89E-01 | Flrt2,399558:down Col3a1,12825:down                                                                                                                                                                                                                                                                                                                                                                                                                                                                                                                                                                                                                                                                                                                                                                                                                                                                                                                                                                                                                                                                                                                                                                                                                                                                                                                                                                                                                                                                                                                                                                                                              |
| triglyceride biosynthetic process                                      | GO:0019432 | 1.02E-01 | 1.89E-01 | Lpl,16956:up C3,12266:up                                                                                                                                                                                                                                                                                                                                                                                                                                                                                                                                                                                                                                                                                                                                                                                                                                                                                                                                                                                                                                                                                                                                                                                                                                                                                                                                                                                                                                                                                                                                                                                                                         |
| alpha-beta T cell proliferation                                        | GO:0046633 | 1.02E-01 | 1.89E-01 | Ceacam1,26365:up Cd24a,12484:down                                                                                                                                                                                                                                                                                                                                                                                                                                                                                                                                                                                                                                                                                                                                                                                                                                                                                                                                                                                                                                                                                                                                                                                                                                                                                                                                                                                                                                                                                                                                                                                                                |
| myeloid cell apoptotic process                                         | GO:0033028 | 1.02E-01 | 1.89E-01 | Kitl,17311:up Adipoq,11450:up                                                                                                                                                                                                                                                                                                                                                                                                                                                                                                                                                                                                                                                                                                                                                                                                                                                                                                                                                                                                                                                                                                                                                                                                                                                                                                                                                                                                                                                                                                                                                                                                                    |
| positive regulation of cytokine production involved in immune response | GO:0002720 | 1.02E-01 | 1.89E-01 | Wnt5a,22418:down Sema7a,20361:down                                                                                                                                                                                                                                                                                                                                                                                                                                                                                                                                                                                                                                                                                                                                                                                                                                                                                                                                                                                                                                                                                                                                                                                                                                                                                                                                                                                                                                                                                                                                                                                                               |
| cell junction organization                                             | GO:0034330 | 1.02E-01 | 1.89E-01 | Ceacam1,26365:up Tnf,21926:up Gpm6b,14758:up Vegfa,22339:down Tgfb2,21808:down Grem1,23892:up                                                                                                                                                                                                                                                                                                                                                                                                                                                                                                                                                                                                                                                                                                                                                                                                                                                                                                                                                                                                                                                                                                                                                                                                                                                                                                                                                                                                                                                                                                                                                    |
| negative regulation of macrophage differentiation                      | GO:0045650 | 1.04E-01 | 1.89E-01 | Adipoq,11450:up                                                                                                                                                                                                                                                                                                                                                                                                                                                                                                                                                                                                                                                                                                                                                                                                                                                                                                                                                                                                                                                                                                                                                                                                                                                                                                                                                                                                                                                                                                                                                                                                                                  |
| positive regulation of pigment cell differentiation                    | GO:0050942 | 1.04E-01 | 1.89E-01 | Kitl,17311:up                                                                                                                                                                                                                                                                                                                                                                                                                                                                                                                                                                                                                                                                                                                                                                                                                                                                                                                                                                                                                                                                                                                                                                                                                                                                                                                                                                                                                                                                                                                                                                                                                                    |
| chondrocyte development involved in endochondral bone morphogenesis    | GO:0003433 | 1.04E-01 | 1.89E-01 | Serpinh1,12406:down                                                                                                                                                                                                                                                                                                                                                                                                                                                                                                                                                                                                                                                                                                                                                                                                                                                                                                                                                                                                                                                                                                                                                                                                                                                                                                                                                                                                                                                                                                                                                                                                                              |
| retinal blood vessel morphogenesis                                     | GO:0061304 | 1.04E-01 | 1.89E-01 | Vegfa,22339:down                                                                                                                                                                                                                                                                                                                                                                                                                                                                                                                                                                                                                                                                                                                                                                                                                                                                                                                                                                                                                                                                                                                                                                                                                                                                                                                                                                                                                                                                                                                                                                                                                                 |
| positive regulation of dendritic cell chemotaxis                       | GO:0000510 | 1.04E-01 | 1.89E-01 | Gas6,14456:up                                                                                                                                                                                                                                                                                                                                                                                                                                                                                                                                                                                                                                                                                                                                                                                                                                                                                                                                                                                                                                                                                                                                                                                                                                                                                                                                                                                                                                                                                                                                                                                                                                    |
| adiponectin-activated signaling pathway                                | GO:0033211 | 1.04E-01 | 1.89E-01 | Adipoq,11450:up                                                                                                                                                                                                                                                                                                                                                                                                                                                                                                                                                                                                                                                                                                                                                                                                                                                                                                                                                                                                                                                                                                                                                                                                                                                                                                                                                                                                                                                                                                                                                                                                                                  |
| necroptotic signaling pathway                                          | GO:0097527 | 1.04E-01 | 1.89E-01 | Tnf,21926:up                                                                                                                                                                                                                                                                                                                                                                                                                                                                                                                                                                                                                                                                                                                                                                                                                                                                                                                                                                                                                                                                                                                                                                                                                                                                                                                                                                                                                                                                                                                                                                                                                                     |
| prolactin secretion                                                    | GO:0070459 | 1.04E-01 | 1.89E-01 | Egfr,13649:down                                                                                                                                                                                                                                                                                                                                                                                                                                                                                                                                                                                                                                                                                                                                                                                                                                                                                                                                                                                                                                                                                                                                                                                                                                                                                                                                                                                                                                                                                                                                                                                                                                  |
| negative regulation of motor neuron apoptotic process                  | GO:0000672 | 1.04E-01 | 1.89E-01 | Crlf1,12931:down                                                                                                                                                                                                                                                                                                                                                                                                                                                                                                                                                                                                                                                                                                                                                                                                                                                                                                                                                                                                                                                                                                                                                                                                                                                                                                                                                                                                                                                                                                                                                                                                                                 |
| doxorubicin metabolic process                                          | GO:0044598 | 1.04E-01 | 1.89E-01 | Akr1c18,105349:up                                                                                                                                                                                                                                                                                                                                                                                                                                                                                                                                                                                                                                                                                                                                                                                                                                                                                                                                                                                                                                                                                                                                                                                                                                                                                                                                                                                                                                                                                                                                                                                                                                |
| activation of MAPKKK activity                                          | GO:0000185 | 1.04E-01 | 1.89E-01 | Tnf,21926:up                                                                                                                                                                                                                                                                                                                                                                                                                                                                                                                                                                                                                                                                                                                                                                                                                                                                                                                                                                                                                                                                                                                                                                                                                                                                                                                                                                                                                                                                                                                                                                                                                                     |
| lung growth                                                            | GO:0060437 | 1.04E-01 | 1.89E-01 | Rspo2,239405:up                                                                                                                                                                                                                                                                                                                                                                                                                                                                                                                                                                                                                                                                                                                                                                                                                                                                                                                                                                                                                                                                                                                                                                                                                                                                                                                                                                                                                                                                                                                                                                                                                                  |

|                                                                      |            |          |          |                     |
|----------------------------------------------------------------------|------------|----------|----------|---------------------|
| negative regulation of chronic inflammatory response                 | GO:0002677 | 1.04E-01 | 1.89E-01 | Cx3cr1,13051:down   |
| negative regulation of glycogen metabolic process                    | GO:0070874 | 1.04E-01 | 1.89E-01 | Enpp1,18605:down    |
| cell proliferation in midbrain                                       | GO:0033278 | 1.04E-01 | 1.89E-01 | Wnt5a,22418:down    |
| ductus arteriosus closure                                            | GO:0097070 | 1.04E-01 | 1.89E-01 | Hpgd,15446:up       |
| snRNA transcription from RNA polymerase III promoter                 | GO:0042796 | 1.04E-01 | 1.89E-01 | lce1,218333:down    |
| regulation of branching involved in mammary gland duct morphogenesis | GO:0060762 | 1.04E-01 | 1.89E-01 | Wnt5a,22418:down    |
| septum primum development                                            | GO:0003284 | 1.04E-01 | 1.89E-01 | Tgfb2,21808:down    |
| regulation of hair follicle maturation                               | GO:0048819 | 1.04E-01 | 1.89E-01 | Tgfb2,21808:down    |
| regulation of melanocyte differentiation                             | GO:0045634 | 1.04E-01 | 1.89E-01 | Kitl,17311:up       |
| regulation of stem cell division                                     | GO:2000035 | 1.04E-01 | 1.89E-01 | Sfrp2,20319:up      |
| L-serine transport                                                   | GO:0015825 | 1.04E-01 | 1.89E-01 | Serinc2,230779:down |
| positive regulation of myeloid cell apoptotic process                | GO:0033034 | 1.04E-01 | 1.89E-01 | Adipoq,11450:up     |
| ventricular compact myocardium morphogenesis                         | GO:0003223 | 1.04E-01 | 1.89E-01 | Bmpr1a,12166:down   |
| testosterone biosynthetic process                                    | GO:0061370 | 1.04E-01 | 1.89E-01 | Akr1c18,105349:up   |
| cellular triglyceride homeostasis                                    | GO:0035356 | 1.04E-01 | 1.89E-01 | C1qtnf3,81799:down  |
| mast cell cytokine production                                        | GO:0032762 | 1.04E-01 | 1.89E-01 | Hmox1,15368:up      |
| apoptotic process involved in heart morphogenesis                    | GO:0003278 | 1.04E-01 | 1.89E-01 | Tgfb2,21808:down    |
| otic vesicle formation                                               | GO:0030916 | 1.04E-01 | 1.89E-01 | Fgfr2,14183:up      |
| negative regulation of interleukin-6 biosynthetic process            | GO:0045409 | 1.04E-01 | 1.89E-01 | Prg4,96875:down     |
| negative regulation of mast cell degranulation                       | GO:0043305 | 1.04E-01 | 1.89E-01 | Hmox1,15368:up      |
| N-acetylneuraminate catabolic process                                | GO:0019262 | 1.04E-01 | 1.89E-01 | Npl,74091:up        |
| positive regulation of thymocyte apoptotic process                   | GO:0070245 | 1.04E-01 | 1.89E-01 | Wnt5a,22418:down    |
| polyketide metabolic process                                         | GO:0030638 | 1.04E-01 | 1.89E-01 | Akr1c18,105349:up   |
| cGMP-mediated signaling                                              | GO:0019934 | 1.04E-01 | 1.89E-01 | Ednrb,13618:up      |
| pre-B cell differentiation                                           | GO:0002329 | 1.04E-01 | 1.89E-01 | Cd24a,12484:down    |
| negative regulation of hair cycle                                    | GO:0042636 | 1.04E-01 | 1.89E-01 | Inhba,16323:down    |
| negative regulation of transforming growth factor beta production    | GO:0071635 | 1.04E-01 | 1.89E-01 | Cd24a,12484:down    |
| convergent extension involved in organogenesis                       | GO:0060029 | 1.04E-01 | 1.89E-01 | Wnt5a,22418:down    |
| cell proliferation in bone marrow                                    | GO:0071838 | 1.04E-01 | 1.89E-01 | Fgfr2,14183:up      |
| multinuclear osteoclast differentiation                              | GO:0072674 | 1.04E-01 | 1.89E-01 | Cd109,235505:down   |
| regulation of adiponectin secretion                                  | GO:0070163 | 1.04E-01 | 1.89E-01 | C1qtnf3,81799:down  |
| embryonic neurocranium morphogenesis                                 | GO:0048702 | 1.04E-01 | 1.89E-01 | Tgfb2,21808:down    |
| primitive erythrocyte differentiation                                | GO:0060319 | 1.04E-01 | 1.89E-01 | Vegfa,22339:down    |

|                                                                                               |            |          |          |                    |
|-----------------------------------------------------------------------------------------------|------------|----------|----------|--------------------|
| negative regulation of immature T cell proliferation                                          | GO:0033087 | 1.04E-01 | 1.89E-01 | Bmp4,12159:up      |
| branch elongation involved in mammary gland duct branching                                    | GO:0060751 | 1.04E-01 | 1.89E-01 | Wnt5a,22418:down   |
| positive regulation of anion transmembrane transport                                          | GO:1903961 | 1.04E-01 | 1.89E-01 | Fxyd1,56188:up     |
| heart induction                                                                               | GO:0003129 | 1.04E-01 | 1.89E-01 | Bmp4,12159:up      |
| non-canonical Wnt signaling pathway via JNK cascade                                           | GO:0038031 | 1.04E-01 | 1.89E-01 | Wnt5a,22418:down   |
| negative regulation of cAMP-dependent protein kinase activity                                 | GO:2000480 | 1.04E-01 | 1.89E-01 | Prkar2b,19088:up   |
| definitive erythrocyte differentiation                                                        | GO:0060318 | 1.04E-01 | 1.89E-01 | Tgfb3,21814:up     |
| substrate-dependent cerebral cortex tangential migration                                      | GO:0021825 | 1.04E-01 | 1.89E-01 | Fgfr1,14182:down   |
| glomerulus vasculature morphogenesis                                                          | GO:0072103 | 1.04E-01 | 1.89E-01 | Bmp4,12159:up      |
| angiogenesis involved in coronary vascular morphogenesis                                      | GO:0060978 | 1.04E-01 | 1.89E-01 | Vegfa,22339:down   |
| regulation of histone deacetylase activity                                                    | GO:1901725 | 1.04E-01 | 1.89E-01 | Vegfa,22339:down   |
| interleukin-18 production                                                                     | GO:0032621 | 1.04E-01 | 1.89E-01 | Tnf,21926:up       |
| common myeloid progenitor cell proliferation                                                  | GO:0035726 | 1.04E-01 | 1.89E-01 | Ceacam1,26365:up   |
| metanephric collecting duct development                                                       | GO:0072205 | 1.04E-01 | 1.89E-01 | Bmp4,12159:up      |
| aortic valve morphogenesis                                                                    | GO:0003180 | 1.04E-01 | 1.89E-01 | Bmp4,12159:up      |
| positive regulation of cell migration by vascular endothelial growth factor signaling pathway | GO:0038089 | 1.04E-01 | 1.89E-01 | Vegfa,22339:down   |
| response to glucagon                                                                          | GO:0033762 | 1.04E-01 | 1.89E-01 | Cdo1,12583:up      |
| response to yeast                                                                             | GO:0001878 | 1.04E-01 | 1.89E-01 | Ptx3,19288:up      |
| negative regulation of monocyte chemotactic protein-1 production                              | GO:0071638 | 1.04E-01 | 1.89E-01 | C1qtnf3,81799:down |
| positive regulation of hematopoietic stem cell proliferation                                  | GO:1902035 | 1.04E-01 | 1.89E-01 | Kitl,17311:up      |
| pyrimidine nucleoside monophosphate metabolic process                                         | GO:0009129 | 1.04E-01 | 1.89E-01 | Uck2,80914:down    |
| aortic valve development                                                                      | GO:0003176 | 1.04E-01 | 1.89E-01 | Bmp4,12159:up      |
| common-partner SMAD protein phosphorylation                                                   | GO:0007182 | 1.04E-01 | 1.89E-01 | Bmp4,12159:up      |
| tricuspid valve development                                                                   | GO:0003175 | 1.04E-01 | 1.89E-01 | Bmpr1a,12166:down  |
| imidazole-containing compound catabolic process                                               | GO:0052805 | 1.04E-01 | 1.89E-01 | Hal,15109:up       |
| positive regulation of synaptic plasticity                                                    | GO:0031915 | 1.04E-01 | 1.89E-01 | Ptgs2,19225:down   |
| aminoglycoside antibiotic metabolic process                                                   | GO:0030647 | 1.04E-01 | 1.89E-01 | Akr1c18,105349:up  |
| negative regulation of vitamin metabolic process                                              | GO:0046137 | 1.04E-01 | 1.89E-01 | Akr1c18,105349:up  |
| negative regulation of protein activation cascade                                             | GO:2000258 | 1.04E-01 | 1.89E-01 | Serping1,12258:up  |
| T cell extravasation                                                                          | GO:0072683 | 1.04E-01 | 1.89E-01 | Ccl2,20296:up      |



|                                                                                 |            |          |          |                                                                                                                              |
|---------------------------------------------------------------------------------|------------|----------|----------|------------------------------------------------------------------------------------------------------------------------------|
| protein retention in ER lumen                                                   | GO:0006621 | 1.04E-01 | 1.89E-01 | Kdelr3,105785:down                                                                                                           |
| daunorubicin metabolic process                                                  | GO:0044597 | 1.04E-01 | 1.89E-01 | Akr1c18,105349:up                                                                                                            |
| peptidyl-proline hydroxylation to 4-hydroxy-L-proline                           | GO:0018401 | 1.04E-01 | 1.89E-01 | P4ha1,18451:down                                                                                                             |
| negative regulation of T-helper 1 type immune response                          | GO:0002826 | 1.04E-01 | 1.89E-01 | Il1r1,17082:down                                                                                                             |
| adiponectin secretion                                                           | GO:0070162 | 1.04E-01 | 1.89E-01 | C1qtnf3,81799:down                                                                                                           |
| negative regulation of complement activation                                    | GO:0045916 | 1.04E-01 | 1.89E-01 | Serping1,12258:up                                                                                                            |
| glomerular capillary formation                                                  | GO:0072104 | 1.04E-01 | 1.89E-01 | Bmp4,12159:up                                                                                                                |
| positive regulation of sequestering of triglyceride                             | GO:0010890 | 1.04E-01 | 1.89E-01 | Lpl,16956:up                                                                                                                 |
| primary alcohol catabolic process                                               | GO:0034310 | 1.04E-01 | 1.89E-01 | Akr1c18,105349:up                                                                                                            |
| osteoclast proliferation                                                        | GO:0002158 | 1.04E-01 | 1.89E-01 | Grem1,23892:up                                                                                                               |
| male gonad development                                                          | GO:0008584 | 1.05E-01 | 1.90E-01 | Sfrp2,20319:up Sfrp1,20377:up Wnt5a,22418:down Inhba,16323:down                                                              |
| development of primary male sexual characteristics                              | GO:0046546 | 1.05E-01 | 1.90E-01 | Sfrp2,20319:up Sfrp1,20377:up Wnt5a,22418:down Inhba,16323:down                                                              |
| negative regulation of homotypic cell-cell adhesion                             | GO:0034111 | 1.05E-01 | 1.90E-01 | Ceacam1,26365:up Cd24a,12484:down Serpine2,20720:up Bmp4,12159:up                                                            |
| nerve development                                                               | GO:0021675 | 1.06E-01 | 1.92E-01 | Ret,19713:up Sulf1,240725:down Serpine2,20720:up                                                                             |
| cholesterol homeostasis                                                         | GO:0042632 | 1.06E-01 | 1.92E-01 | Cd24a,12484:down Fabp4,11770:up Lpl,16956:up                                                                                 |
| sterol homeostasis                                                              | GO:0055092 | 1.06E-01 | 1.92E-01 | Cd24a,12484:down Fabp4,11770:up Lpl,16956:up                                                                                 |
| sequestering of metal ion                                                       | GO:0051238 | 1.08E-01 | 1.95E-01 | Htr2b,15559:down Glp1r,14652:down Tgfb2,21808:down Htr2a,15558:down                                                          |
| negative regulation of fibroblast proliferation                                 | GO:0048147 | 1.08E-01 | 1.95E-01 | Pparg,19016:up Sfrp1,20377:up                                                                                                |
| granulocyte differentiation                                                     | GO:0030851 | 1.08E-01 | 1.95E-01 | Ceacam1,26365:up Adipoq,11450:up                                                                                             |
| cell proliferation in forebrain                                                 | GO:0021846 | 1.08E-01 | 1.95E-01 | Fgfr1,14182:down Fgfr2,14183:up                                                                                              |
| regulation of platelet activation                                               | GO:0010543 | 1.08E-01 | 1.95E-01 | Ceacam1,26365:up Serpine2,20720:up                                                                                           |
| cardiac atrium morphogenesis                                                    | GO:0003209 | 1.08E-01 | 1.95E-01 | Wnt5a,22418:down Tgfb2,21808:down                                                                                            |
| activation of MAPKK activity                                                    | GO:0000186 | 1.08E-01 | 1.95E-01 | Egfr,13649:down Bmp4,12159:up                                                                                                |
| cellular response to fatty acid                                                 | GO:0071398 | 1.08E-01 | 1.95E-01 | Akr1c18,105349:up Ptgir,19222:up                                                                                             |
| negative regulation of B cell activation                                        | GO:0050869 | 1.08E-01 | 1.95E-01 | Cd24a,12484:down Sfrp1,20377:up                                                                                              |
| negative regulation of intracellular steroid hormone receptor signaling pathway | GO:0033144 | 1.08E-01 | 1.95E-01 | Sfrp1,20377:up Igf1,16000:up                                                                                                 |
| regulation of nucleotide metabolic process                                      | GO:0006140 | 1.09E-01 | 1.96E-01 | Adm,11535:up Wnt5a,22418:down Vegfa,22339:down Htr2a,15558:down Ptgir,19222:up Igf1,16000:up                                 |
| response to peptide                                                             | GO:1901652 | 1.09E-01 | 1.96E-01 | Pparg,19016:up Igf1,16000:up Adipoq,11450:up Serpina3g,20715:up Gatm,67092:down Igf2,16002:up Enpp1,18605:down Cdo1,12583:up |
| positive regulation of tumor necrosis factor production                         | GO:0032760 | 1.09E-01 | 1.97E-01 | Ccl2,20296:up Ccl4,20303:up Ccl3,20302:up                                                                                    |
| positive regulation of neuron apoptotic process                                 | GO:0043525 | 1.09E-01 | 1.97E-01 | Tnf,21926:up Tgfb2,21808:down Ccl3,20302:up                                                                                  |
| positive regulation of synapse assembly                                         | GO:0051965 | 1.09E-01 | 1.97E-01 | SrpX2,68792:down Flrt2,399558:down Thbs2,21826:down                                                                          |
| glucan metabolic process                                                        | GO:0044042 | 1.09E-01 | 1.97E-01 | Enpp1,18605:down Igf2,16002:up Igf1,16000:up                                                                                 |
| cellular glucan metabolic process                                               | GO:0006073 | 1.09E-01 | 1.97E-01 | Enpp1,18605:down Igf2,16002:up Igf1,16000:up                                                                                 |
| glycogen metabolic process                                                      | GO:0005977 | 1.09E-01 | 1.97E-01 | Enpp1,18605:down Igf2,16002:up Igf1,16000:up                                                                                 |

|                                                                                   |            |          |          |                                                                                                                                                                                                                                                                                                                                                                                    |
|-----------------------------------------------------------------------------------|------------|----------|----------|------------------------------------------------------------------------------------------------------------------------------------------------------------------------------------------------------------------------------------------------------------------------------------------------------------------------------------------------------------------------------------|
| regulation of smoothened signaling pathway                                        | GO:0008589 | 1.09E-01 | 1.97E-01 | Sfrp1,20377:up Serpine2,20720:up Fgfr2,14183:up                                                                                                                                                                                                                                                                                                                                    |
| negative regulation of transcription, DNA-templated                               | GO:0045892 | 1.10E-01 | 1.98E-01 | Sfrp4,20379:up Ednrb,13618:up Epas1,13819:up Ankrd1,107765:down Vdr,22337:down Fabp4,11770:up Vegfa,22339:down Gas6,14456:up Pparg,19016:up Tnf,21926:up Loxl2,94352:down Loxl3,16950:down Lmcd1,30937:up Fgfr1,14182:down Hmox1,15368:up Sfrp1,20377:up Wnt5a,22418:down Grem1,23892:up Adipoq,11450:up Bmp4,12159:up Sfrp2,20319:up Fgfr2,14183:up S100a1,20193:up               |
| DNA replication                                                                   | GO:0006260 | 1.10E-01 | 1.99E-01 | Pparg,19016:up Fgfr1,14182:down Egfr,13649:down Pdgfc,54635:down Grem1,23892:up Igf1,16000:up Bmp4,12159:up Kitl,17311:up                                                                                                                                                                                                                                                          |
| negative regulation of nucleic acid-templated transcription                       | GO:1903507 | 1.12E-01 | 2.01E-01 | Sfrp4,20379:up Ednrb,13618:up Epas1,13819:up Ankrd1,107765:down Vdr,22337:down Fabp4,11770:up Vegfa,22339:down Gas6,14456:up Pparg,19016:up Tnf,21926:up Loxl2,94352:down Loxl3,16950:down Lmcd1,30937:up Fgfr1,14182:down Hmox1,15368:up Sfrp1,20377:up Wnt5a,22418:down Grem1,23892:up Adipoq,11450:up Bmp4,12159:up Sfrp2,20319:up Fgfr2,14183:up S100a1,20193:up               |
| rhythmic process                                                                  | GO:0048511 | 1.12E-01 | 2.02E-01 | Pparg,19016:up Egfr,13649:down Inhba,16323:down Igf1,16000:up Bmp4,12159:up Vegfa,22339:down Mmp2,17390:down Kitl,17311:up                                                                                                                                                                                                                                                         |
| activation of cysteine-type endopeptidase activity                                | GO:0097202 | 1.13E-01 | 2.03E-01 | Tnf,21926:up Pparg,19016:up F3,14066:up                                                                                                                                                                                                                                                                                                                                            |
| regulation of cellular response to insulin stimulus                               | GO:1900076 | 1.13E-01 | 2.03E-01 | Pparg,19016:up Enpp1,18605:down Igf2,16002:up                                                                                                                                                                                                                                                                                                                                      |
| ADP metabolic process                                                             | GO:0046031 | 1.13E-01 | 2.03E-01 | Htr2a,15558:down Ampd3,11717:up Igf1,16000:up                                                                                                                                                                                                                                                                                                                                      |
| alpha-amino acid catabolic process                                                | GO:1901606 | 1.13E-01 | 2.03E-01 | Ddah1,69219:down Hal,15109:up Cdo1,12583:up                                                                                                                                                                                                                                                                                                                                        |
| positive regulation of tumor necrosis factor superfamily cytokine production      | GO:1903557 | 1.13E-01 | 2.03E-01 | Ccl2,20296:up Ccl4,20303:up Ccl3,20302:up                                                                                                                                                                                                                                                                                                                                          |
| negative regulation of RNA metabolic process                                      | GO:0051253 | 1.13E-01 | 2.03E-01 | Sfrp4,20379:up Ednrb,13618:up Epas1,13819:up Ankrd1,107765:down Vdr,22337:down Fabp4,11770:up Vegfa,22339:down Gas6,14456:up Pparg,19016:up Tnf,21926:up Loxl2,94352:down Loxl3,16950:down Lmcd1,30937:up Fgfr1,14182:down Hmox1,15368:up Sfrp1,20377:up Wnt5a,22418:down Ccl4,20303:up Grem1,23892:up Adipoq,11450:up Bmp4,12159:up Sfrp2,20319:up Fgfr2,14183:up S100a1,20193:up |
| gastrulation with mouth forming second                                            | GO:0001702 | 1.13E-01 | 2.03E-01 | Wnt5a,22418:down Plpp3,67916:up                                                                                                                                                                                                                                                                                                                                                    |
| peptide cross-linking                                                             | GO:0018149 | 1.13E-01 | 2.03E-01 | Mamdc2,71738:down Col3a1,12825:down                                                                                                                                                                                                                                                                                                                                                |
| olfactory bulb development                                                        | GO:0021772 | 1.13E-01 | 2.03E-01 | Fgfr1,14182:down Wnt5a,22418:down                                                                                                                                                                                                                                                                                                                                                  |
| negative regulation of signal transduction in absence of ligand                   | GO:1901099 | 1.13E-01 | 2.03E-01 | Tnf,21926:up Cx3cr1,13051:down                                                                                                                                                                                                                                                                                                                                                     |
| face morphogenesis                                                                | GO:0060325 | 1.13E-01 | 2.03E-01 | Tgfb2,21808:down Mmp2,17390:down                                                                                                                                                                                                                                                                                                                                                   |
| response to fungus                                                                | GO:0009620 | 1.13E-01 | 2.03E-01 | Ptx3,19288:up Clec4n,56620:up                                                                                                                                                                                                                                                                                                                                                      |
| regulation of glycolytic process                                                  | GO:0006110 | 1.13E-01 | 2.03E-01 | Htr2a,15558:down Igf1,16000:up                                                                                                                                                                                                                                                                                                                                                     |
| embryonic digestive tract development                                             | GO:0048566 | 1.13E-01 | 2.03E-01 | Aldh1a2,19378:up Fgfr2,14183:up                                                                                                                                                                                                                                                                                                                                                    |
| negative regulation of extrinsic apoptotic signaling pathway in absence of ligand | GO:2001240 | 1.13E-01 | 2.03E-01 | Tnf,21926:up Cx3cr1,13051:down                                                                                                                                                                                                                                                                                                                                                     |
| glial cell differentiation                                                        | GO:0010001 | 1.15E-01 | 2.06E-01 | Pparg,19016:up Egfr,13649:down Plpp3,67916:up Serpine2,20720:up Igf1,16000:up Bmp4,12159:up                                                                                                                                                                                                                                                                                        |
| neuron migration                                                                  | GO:0001764 | 1.15E-01 | 2.06E-01 | Gas6,14456:up Flrt2,399558:down Cxcl12,20315:up Mark1,226778:up Col3a1,12825:down                                                                                                                                                                                                                                                                                                  |
| ammonium ion metabolic process                                                    | GO:0097164 | 1.15E-01 | 2.06E-01 | Akr1c18,105349:up Fabp5,16592:up Tgfb2,21808:down Maob,109731:up Epas1,13819:up                                                                                                                                                                                                                                                                                                    |
| positive regulation of cell cycle                                                 | GO:0045787 | 1.16E-01 | 2.07E-01 | Tnf,21926:up Fgfr1,14182:down Egfr,13649:down Wnt5a,22418:down Igf1,16000:up Tgfb2,21808:down Fgfr2,14183:up Igf2,16002:up                                                                                                                                                                                                                                                         |
| organonitrogen compound catabolic process                                         | GO:1901565 | 1.16E-01 | 2.08E-01 | Ddah1,69219:down Hmox1,15368:up Blvrb,233016:up Mmp13,17386:up Anpep,16790:up Hal,15109:up Cdo1,12583:up                                                                                                                                                                                                                                                                           |
| positive regulation of NF-kappaB transcription factor activity                    | GO:0051092 | 1.16E-01 | 2.08E-01 | Tnf,21926:up Wnt5a,22418:down Tgfb3,21814:up Grem1,23892:up                                                                                                                                                                                                                                                                                                                        |
| dorsal/ventral pattern formation                                                  | GO:0009953 | 1.16E-01 | 2.08E-01 | Sfrp1,20377:up Bmpr1a,12166:down Grem1,23892:up Bmp4,12159:up                                                                                                                                                                                                                                                                                                                      |
| cell-substrate junction assembly                                                  | GO:0007044 | 1.17E-01 | 2.08E-01 | Gpm6b,14758:up Vegfa,22339:down Grem1,23892:up                                                                                                                                                                                                                                                                                                                                     |
| astrocyte differentiation                                                         | GO:0048708 | 1.17E-01 | 2.08E-01 | Egfr,13649:down Plpp3,67916:up Serpine2,20720:up                                                                                                                                                                                                                                                                                                                                   |
| mammary gland epithelium development                                              | GO:0061180 | 1.17E-01 | 2.08E-01 | Vdr,22337:down Wnt5a,22418:down Fgfr2,14183:up                                                                                                                                                                                                                                                                                                                                     |

|                                                                              |            |          |          |                                                                                                                                                                                                                                                                                                                                                                               |
|------------------------------------------------------------------------------|------------|----------|----------|-------------------------------------------------------------------------------------------------------------------------------------------------------------------------------------------------------------------------------------------------------------------------------------------------------------------------------------------------------------------------------|
| hematopoietic progenitor cell differentiation                                | GO:0002244 | 1.18E-01 | 2.08E-01 | Fstl3,83554:down Sfrp1,20377:up Vegfa,22339:down Inhba,16323:down Bmp4,12159:up                                                                                                                                                                                                                                                                                               |
| vesicle-mediated transport                                                   | GO:0016192 | 1.18E-01 | 2.08E-01 | Htr2b,15559:down Adm,11535:up Mrc1,17533:up Sfrp4,20379:up Ccl2,20296:up C3,12266:up Vegfa,22339:down Kdelr3,105785:down Gas6,14456:up Pparg,19016:up Tnf,21926:up Ptx3,19288:up Trf,22041:up Cd24a,12484:down Sec23a,20334:down Ncam1,17967:down Hmox1,15368:up Wnt5a,22418:down Tfrc,22042:up Grem1,23892:up Adipoq,11450:up Fgfr2,14183:up Sytn13,80976:up Mrc2,17534:down |
| acylglycerol biosynthetic process                                            | GO:0046463 | 1.19E-01 | 2.08E-01 | Lpl,16956:up C3,12266:up                                                                                                                                                                                                                                                                                                                                                      |
| neutral lipid biosynthetic process                                           | GO:0046460 | 1.19E-01 | 2.08E-01 | Lpl,16956:up C3,12266:up                                                                                                                                                                                                                                                                                                                                                      |
| porphyrin-containing compound metabolic process                              | GO:0006778 | 1.19E-01 | 2.08E-01 | Hmox1,15368:up Blvrb,233016:up                                                                                                                                                                                                                                                                                                                                                |
| epidermis morphogenesis                                                      | GO:0048730 | 1.19E-01 | 2.08E-01 | Tgfb2,21808:down Fgfr2,14183:up                                                                                                                                                                                                                                                                                                                                               |
| cellular response to vascular endothelial growth factor stimulus             | GO:0035924 | 1.19E-01 | 2.08E-01 | Vegfa,22339:down Adamts12,239337:down                                                                                                                                                                                                                                                                                                                                         |
| cytokine biosynthetic process                                                | GO:0042089 | 1.20E-01 | 2.08E-01 | Tnf,21926:up Prg4,96875:down Wnt5a,22418:down Errfi1,74155:down                                                                                                                                                                                                                                                                                                               |
| positive regulation of extracellular matrix disassembly                      | GO:0090091 | 1.20E-01 | 2.08E-01 | Tgfb2,21808:down                                                                                                                                                                                                                                                                                                                                                              |
| keratinocyte apoptotic process                                               | GO:0097283 | 1.20E-01 | 2.08E-01 | Sfrp4,20379:up                                                                                                                                                                                                                                                                                                                                                                |
| regulation of low-density lipoprotein particle receptor biosynthetic process | GO:0045714 | 1.20E-01 | 2.08E-01 | Adipoq,11450:up                                                                                                                                                                                                                                                                                                                                                               |
| Wnt signaling pathway involved in dorsal/ventral axis specification          | GO:0044332 | 1.20E-01 | 2.08E-01 | Sfrp1,20377:up                                                                                                                                                                                                                                                                                                                                                                |
| positive regulation of cell maturation                                       | GO:1903431 | 1.20E-01 | 2.08E-01 | Ret,19713:up                                                                                                                                                                                                                                                                                                                                                                  |
| positive regulation of developmental pigmentation                            | GO:0048087 | 1.20E-01 | 2.08E-01 | Kitl,17311:up                                                                                                                                                                                                                                                                                                                                                                 |
| positive regulation of keratinocyte migration                                | GO:0051549 | 1.20E-01 | 2.08E-01 | Has2,15117:down                                                                                                                                                                                                                                                                                                                                                               |
| regulation of endothelial cell chemotaxis to fibroblast growth factor        | GO:2000544 | 1.20E-01 | 2.08E-01 | Fgfr1,14182:down                                                                                                                                                                                                                                                                                                                                                              |
| epithelial fluid transport                                                   | GO:0042045 | 1.20E-01 | 2.08E-01 | Ednrb,13618:up                                                                                                                                                                                                                                                                                                                                                                |
| mitotic DNA replication                                                      | GO:1902969 | 1.20E-01 | 2.08E-01 | Fgfr1,14182:down                                                                                                                                                                                                                                                                                                                                                              |
| cell chemotaxis to fibroblast growth factor                                  | GO:0035766 | 1.20E-01 | 2.08E-01 | Fgfr1,14182:down                                                                                                                                                                                                                                                                                                                                                              |
| positive regulation of cholesterol storage                                   | GO:0010886 | 1.20E-01 | 2.08E-01 | Lpl,16956:up                                                                                                                                                                                                                                                                                                                                                                  |
| transferrin transport                                                        | GO:0033572 | 1.20E-01 | 2.08E-01 | Tfrc,22042:up                                                                                                                                                                                                                                                                                                                                                                 |
| epithelial-mesenchymal cell signaling                                        | GO:0060684 | 1.20E-01 | 2.08E-01 | Bmp4,12159:up                                                                                                                                                                                                                                                                                                                                                                 |
| hormone catabolic process                                                    | GO:0042447 | 1.20E-01 | 2.08E-01 | Akr1c18,105349:up                                                                                                                                                                                                                                                                                                                                                             |
| sulfur amino acid catabolic process                                          | GO:0000998 | 1.20E-01 | 2.08E-01 | Cdo1,12583:up                                                                                                                                                                                                                                                                                                                                                                 |
| cellular phosphate ion homeostasis                                           | GO:0030643 | 1.20E-01 | 2.08E-01 | Enpp1,18605:down                                                                                                                                                                                                                                                                                                                                                              |
| regulation of keratinocyte apoptotic process                                 | GO:1902172 | 1.20E-01 | 2.08E-01 | Sfrp4,20379:up                                                                                                                                                                                                                                                                                                                                                                |
| commissural neuron axon guidance                                             | GO:0071679 | 1.20E-01 | 2.08E-01 | Vegfa,22339:down                                                                                                                                                                                                                                                                                                                                                              |
| lens induction in camera-type eye                                            | GO:0060235 | 1.20E-01 | 2.08E-01 | Bmp4,12159:up                                                                                                                                                                                                                                                                                                                                                                 |
| vascular smooth muscle cell development                                      | GO:0097084 | 1.20E-01 | 2.08E-01 | Adm,11535:up                                                                                                                                                                                                                                                                                                                                                                  |
| regulation of tooth mineralization                                           | GO:0070170 | 1.20E-01 | 2.08E-01 | Aspn,66695:down                                                                                                                                                                                                                                                                                                                                                               |
| pericardium morphogenesis                                                    | GO:0003344 | 1.20E-01 | 2.08E-01 | Wnt5a,22418:down                                                                                                                                                                                                                                                                                                                                                              |

|                                                                                                                                    |            |          |          |                    |
|------------------------------------------------------------------------------------------------------------------------------------|------------|----------|----------|--------------------|
| positive regulation of deacetylase activity                                                                                        | GO:0090045 | 1.20E-01 | 2.08E-01 | Vegfa,22339:down   |
| negative regulation of cellular extravasation                                                                                      | GO:0002692 | 1.20E-01 | 2.08E-01 | Cxcl12,20315:up    |
| cellular trivalent inorganic anion homeostasis                                                                                     | GO:0072502 | 1.20E-01 | 2.08E-01 | Enpp1,18605:down   |
| trachea formation                                                                                                                  | GO:0060440 | 1.20E-01 | 2.08E-01 | Bmp4,12159:up      |
| chondroitin sulfate biosynthetic process                                                                                           | GO:0030206 | 1.20E-01 | 2.08E-01 | Chst11,58250:down  |
| regulation of keratinocyte migration                                                                                               | GO:0051547 | 1.20E-01 | 2.08E-01 | Has2,15117:down    |
| regulation of lymphangiogenesis                                                                                                    | GO:1901490 | 1.20E-01 | 2.08E-01 | Vegfa,22339:down   |
| histidine metabolic process                                                                                                        | GO:0006547 | 1.20E-01 | 2.08E-01 | Hal,15109:up       |
| artery smooth muscle contraction                                                                                                   | GO:0014824 | 1.20E-01 | 2.08E-01 | Htr2a,15558:down   |
| endothelial cell chemotaxis to fibroblast growth factor                                                                            | GO:0035768 | 1.20E-01 | 2.08E-01 | Fgfr1,14182:down   |
| optic cup morphogenesis involved in camera-type eye development                                                                    | GO:0002072 | 1.20E-01 | 2.08E-01 | Aldh1a3,56847:down |
| regulation of transcription from RNA polymerase II promoter involved in myocardial precursor cell differentiation                  | GO:0003256 | 1.20E-01 | 2.08E-01 | Grem1,23892:up     |
| outer ear morphogenesis                                                                                                            | GO:0042473 | 1.20E-01 | 2.08E-01 | Fgfr1,14182:down   |
| cellular response to follicle-stimulating hormone stimulus                                                                         | GO:0071372 | 1.20E-01 | 2.08E-01 | Inhba,16323:down   |
| regulation of cell-cell adhesion mediated by integrin                                                                              | GO:0033632 | 1.20E-01 | 2.08E-01 | Cd24a,12484:down   |
| neural plate regionalization                                                                                                       | GO:0060897 | 1.20E-01 | 2.08E-01 | Bmpr1a,12166:down  |
| regulation of microvillus assembly                                                                                                 | GO:0032534 | 1.20E-01 | 2.08E-01 | Pr12c2,18811:up    |
| vitamin D receptor signaling pathway                                                                                               | GO:0070561 | 1.20E-01 | 2.08E-01 | Vdr,22337:down     |
| taurine metabolic process                                                                                                          | GO:0019530 | 1.20E-01 | 2.08E-01 | Cdo1,12583:up      |
| ureteric bud formation                                                                                                             | GO:0060676 | 1.20E-01 | 2.08E-01 | Grem1,23892:up     |
| regulation of cardioblast differentiation                                                                                          | GO:0051890 | 1.20E-01 | 2.08E-01 | Tgfb2,21808:down   |
| positive regulation of hypersensitivity                                                                                            | GO:0002885 | 1.20E-01 | 2.08E-01 | C3,12266:up        |
| regulation of myosin-light-chain-phosphatase activity                                                                              | GO:0035507 | 1.20E-01 | 2.08E-01 | Tnf,21926:up       |
| positive regulation of cyclin-dependent protein serine/threonine kinase activity involved in G1/S transition of mitotic cell cycle | GO:0031659 | 1.20E-01 | 2.08E-01 | Egfr,13649:down    |
| mesenchymal cell differentiation involved in kidney development                                                                    | GO:0072161 | 1.20E-01 | 2.08E-01 | Bmp4,12159:up      |
| negative regulation of apoptotic process involved in morphogenesis                                                                 | GO:1902338 | 1.20E-01 | 2.08E-01 | Tgfb3,21814:up     |
| negative regulation of mast cell activation involved in immune response                                                            | GO:0033007 | 1.20E-01 | 2.08E-01 | Hmox1,15368:up     |
| cellular response to cholesterol                                                                                                   | GO:0071397 | 1.20E-01 | 2.08E-01 | Inhba,16323:down   |

|                                                                                     |            |          |          |                                                                                                                                                            |
|-------------------------------------------------------------------------------------|------------|----------|----------|------------------------------------------------------------------------------------------------------------------------------------------------------------|
| ureteric bud elongation                                                             | GO:0060677 | 1.20E-01 | 2.08E-01 | Bmp4,12159:up                                                                                                                                              |
| non-canonical Wnt signaling pathway via MAPK cascade                                | GO:0038030 | 1.20E-01 | 2.08E-01 | Wnt5a,22418:down                                                                                                                                           |
| renal system vasculature morphogenesis                                              | GO:0061438 | 1.20E-01 | 2.08E-01 | Bmp4,12159:up                                                                                                                                              |
| positive regulation of epithelial cell proliferation involved in lung morphogenesis | GO:0060501 | 1.20E-01 | 2.08E-01 | Fgfr2,14183:up                                                                                                                                             |
| serine transport                                                                    | GO:0032329 | 1.20E-01 | 2.08E-01 | Serinc2,230779:down                                                                                                                                        |
| regulation of cell-cell adhesion mediated by cadherin                               | GO:2000047 | 1.20E-01 | 2.08E-01 | Wnt5a,22418:down                                                                                                                                           |
| Type II pneumocyte differentiation                                                  | GO:0060510 | 1.20E-01 | 2.08E-01 | Igf1,16000:up                                                                                                                                              |
| dorsal aorta morphogenesis                                                          | GO:0035912 | 1.20E-01 | 2.08E-01 | Bmpr1a,12166:down                                                                                                                                          |
| negative regulation of protein localization to cell surface                         | GO:2000009 | 1.20E-01 | 2.08E-01 | Gpm6b,14758:up                                                                                                                                             |
| negative regulation of renal sodium excretion                                       | GO:0035814 | 1.20E-01 | 2.08E-01 | Anpep,16790:up                                                                                                                                             |
| mesenchymal cell differentiation involved in renal system development               | GO:2001012 | 1.20E-01 | 2.08E-01 | Bmp4,12159:up                                                                                                                                              |
| tonic smooth muscle contraction                                                     | GO:0014820 | 1.20E-01 | 2.08E-01 | Htr2a,15558:down                                                                                                                                           |
| Type I pneumocyte differentiation                                                   | GO:0060509 | 1.20E-01 | 2.08E-01 | Igf1,16000:up                                                                                                                                              |
| peptide cross-linking via chondroitin 4-sulfate glycosaminoglycan                   | GO:0019800 | 1.20E-01 | 2.08E-01 | Mamdc2,71738:down                                                                                                                                          |
| positive regulation of myoblast proliferation                                       | GO:2000288 | 1.20E-01 | 2.08E-01 | Igf1,16000:up                                                                                                                                              |
| serine phosphorylation of STAT3 protein                                             | GO:0033136 | 1.20E-01 | 2.08E-01 | Ret,19713:up                                                                                                                                               |
| cellular response to epinephrine stimulus                                           | GO:0071872 | 1.20E-01 | 2.08E-01 | Adipoq,11450:up                                                                                                                                            |
| negative regulation of cell fate specification                                      | GO:0009996 | 1.20E-01 | 2.08E-01 | Sfrp2,20319:up                                                                                                                                             |
| kidney vasculature morphogenesis                                                    | GO:0061439 | 1.20E-01 | 2.08E-01 | Bmp4,12159:up                                                                                                                                              |
| response to epinephrine                                                             | GO:0071871 | 1.20E-01 | 2.08E-01 | Adipoq,11450:up                                                                                                                                            |
| B cell chemotaxis                                                                   | GO:0035754 | 1.20E-01 | 2.08E-01 | Gas6,14456:up                                                                                                                                              |
| maintenance of protein localization in endoplasmic reticulum                        | GO:0035437 | 1.20E-01 | 2.08E-01 | Kdelr3,105785:down                                                                                                                                         |
| mannose metabolic process                                                           | GO:0006013 | 1.20E-01 | 2.08E-01 | Man2a2,140481:up                                                                                                                                           |
| atrioventricular canal development                                                  | GO:0036302 | 1.20E-01 | 2.08E-01 | Has2,15117:down                                                                                                                                            |
| neuron-neuron synaptic transmission                                                 | GO:0007270 | 1.20E-01 | 2.09E-01 | Egfr,13649:down Htr2a,15558:down Ptgs2,19225:down Serpine2,20720:up Plat,18791:down                                                                        |
| regulation of ion transmembrane transport                                           | GO:0034765 | 1.20E-01 | 2.09E-01 | Hvcn1,74096:up Fxyd1,56188:up Ccl12,20293:up Stc1,20855:up Kcnj15,16516:down Fxyd2,11936:up Bmp4,12159:up Cxcl12,20315:up Tgfb2,21808:down S100a1,20193:up |
| negative regulation of behavior                                                     | GO:0048521 | 1.21E-01 | 2.10E-01 | Wnt5a,22418:down Ccl12,20293:up Grem1,23892:up                                                                                                             |
| muscle cell development                                                             | GO:0055001 | 1.23E-01 | 2.13E-01 | Adm,11535:up Vegfa,22339:down Wisp1,22402:down Igf1,16000:up Bmp4,12159:up                                                                                 |
| peptidyl-serine phosphorylation                                                     | GO:0018105 | 1.24E-01 | 2.16E-01 | Tnf,21926:up Gas6,14456:up Plk2,20620:down Sfrp2,20319:up Ret,19713:up Wnt5a,22418:down Vegfa,22339:down                                                   |
| regulation of glial cell differentiation                                            | GO:0045685 | 1.25E-01 | 2.17E-01 | Pparg,19016:up Serpine2,20720:up Bmp4,12159:up                                                                                                             |
| response to ammonium ion                                                            | GO:0060359 | 1.25E-01 | 2.17E-01 | Htr2b,15559:down Ncam1,17967:down Htr2a,15558:down                                                                                                         |
| monosaccharide biosynthetic process                                                 | GO:0046364 | 1.25E-01 | 2.17E-01 | Sord,20322:up C1qtnf3,81799:down Adipoq,11450:up                                                                                                           |
| positive regulation of anion transport                                              | GO:1903793 | 1.25E-01 | 2.17E-01 | Fxyd1,56188:up Fam132b,227358:down Cxcl12,20315:up                                                                                                         |
| regulation of telomerase activity                                                   | GO:0051972 | 1.25E-01 | 2.17E-01 | Pparg,19016:up Grem1,23892:up                                                                                                                              |

|                                                              |            |          |          |                                                                                                                                                                                                                                                                                                                                                                                                                                                                                                                                         |
|--------------------------------------------------------------|------------|----------|----------|-----------------------------------------------------------------------------------------------------------------------------------------------------------------------------------------------------------------------------------------------------------------------------------------------------------------------------------------------------------------------------------------------------------------------------------------------------------------------------------------------------------------------------------------|
| regulation of nucleotide catabolic process                   | GO:0030811 | 1.25E-01 | 2.17E-01 | Htr2a,15558:down Igf1,16000:up                                                                                                                                                                                                                                                                                                                                                                                                                                                                                                          |
| cellular response to heat                                    | GO:0034605 | 1.25E-01 | 2.17E-01 | Tfec,21426:up Hmox1,15368:up                                                                                                                                                                                                                                                                                                                                                                                                                                                                                                            |
| positive regulation of phospholipid metabolic process        | GO:1903727 | 1.25E-01 | 2.17E-01 | Htr2b,15559:down Htr2a,15558:down                                                                                                                                                                                                                                                                                                                                                                                                                                                                                                       |
| regulation of myelination                                    | GO:0031641 | 1.25E-01 | 2.17E-01 | Tnf,21926:up Trf,22041:up                                                                                                                                                                                                                                                                                                                                                                                                                                                                                                               |
| positive regulation of vasodilation                          | GO:0045909 | 1.25E-01 | 2.17E-01 | Adm,11535:up Egfr,13649:down                                                                                                                                                                                                                                                                                                                                                                                                                                                                                                            |
| proximal/distal pattern formation                            | GO:0009954 | 1.25E-01 | 2.17E-01 | Aldh1a2,19378:up Grem1,23892:up                                                                                                                                                                                                                                                                                                                                                                                                                                                                                                         |
| regulation of synaptic plasticity                            | GO:0048167 | 1.25E-01 | 2.17E-01 | Plk2,20620:down Ncam1,17967:down Ptgs2,19225:down Cx3cr1,13051:down Serpine2,20720:up                                                                                                                                                                                                                                                                                                                                                                                                                                                   |
| G-protein coupled receptor signaling pathway                 | GO:0007186 | 1.25E-01 | 2.17E-01 | Htr2b,15559:down Adm,11535:up Ccl9,20308:up Ccl6,20305:up Ccl7,20306:up Ccl2,20296:up C3,12266:up Ednrb,13618:up Ccl3,20302:up Cxcr6,80901:down Htr2a,15558:down Cx3cr1,13051:down Akr1c18,105349:up Glp1r,14652:down Ccl12,20293:up Ccl4,20303:up Ccl8,20307:up Cxcl9,17329:up Ptgir,19222:up                                                                                                                                                                                                                                          |
| post-embryonic development                                   | GO:0009791 | 1.26E-01 | 2.17E-01 | Chst11,58250:down Vegfa,22339:down Fgfr2,14183:up Bmp4,12159:up                                                                                                                                                                                                                                                                                                                                                                                                                                                                         |
| cellular response to stress                                  | GO:0033554 | 1.26E-01 | 2.17E-01 | Adm,11535:up Tfec,21426:up Sfrp4,20379:up Epas1,13819:up Ankrd1,107765:down Uchl5,56207:up Akr1c18,105349:up Trf,22041:up Wnt5a,22418:down Bmpr1a,12166:down Il1rn,16181:up Bmp4,12159:up Tnc,21923:down Tgfb2,21808:down Sdf2l1,64136:up Creb3l1,26427:down Hp,15439:up Pdia5,72599:down Cxc12,20315:up Plod2,26432:down Nabp1,109019:down Vegfa,22339:down Mmp2,17390:down Tnf,21926:up Gas6,14456:up Lmcd1,30937:up Egfr,13649:down Sfrp1,20377:up Hmox1,15368:up Ptgs2,19225:down Ceacam1,26365:up Sfrp2,20319:up Errfi1,74155:down |
| negative regulation of mitotic cell cycle                    | GO:0045930 | 1.28E-01 | 2.21E-01 | Plk2,20620:down Egfr,13649:down Nabp1,109019:down Fgfr2,14183:up Bmp4,12159:up                                                                                                                                                                                                                                                                                                                                                                                                                                                          |
| negative regulation of neuron apoptotic process              | GO:0043524 | 1.28E-01 | 2.21E-01 | Glp1r,14652:down Crlf1,12931:down Hmox1,15368:up Ccl12,20293:up Mt1,17748:up                                                                                                                                                                                                                                                                                                                                                                                                                                                            |
| cytokine metabolic process                                   | GO:0042107 | 1.29E-01 | 2.22E-01 | Tnf,21926:up Prg4,96875:down Wnt5a,22418:down Errfi1,74155:down                                                                                                                                                                                                                                                                                                                                                                                                                                                                         |
| purine ribonucleoside diphosphate metabolic process          | GO:0009179 | 1.29E-01 | 2.22E-01 | Htr2a,15558:down Ampd3,11717:up Igf1,16000:up                                                                                                                                                                                                                                                                                                                                                                                                                                                                                           |
| adherens junction assembly                                   | GO:0034333 | 1.29E-01 | 2.22E-01 | Gpm6b,14758:up Vegfa,22339:down Grem1,23892:up                                                                                                                                                                                                                                                                                                                                                                                                                                                                                          |
| purine nucleoside diphosphate metabolic process              | GO:0009135 | 1.29E-01 | 2.22E-01 | Htr2a,15558:down Ampd3,11717:up Igf1,16000:up                                                                                                                                                                                                                                                                                                                                                                                                                                                                                           |
| organic hydroxy compound metabolic process                   | GO:1901615 | 1.30E-01 | 2.24E-01 | Tnf,21926:up Akr1c18,105349:up Fgfr1,14182:down Fabp5,16592:up Wnt5a,22418:down Maob,109731:up Epas1,13819:up Vdr,22337:down Sord,20322:up Tgfb2,21808:down Pdxk,216134:up                                                                                                                                                                                                                                                                                                                                                              |
| myeloid leukocyte activation                                 | GO:0002274 | 1.31E-01 | 2.25E-01 | Hmox1,15368:up Wnt5a,22418:down Cx3cr1,13051:down Il1r1,17082:down Tnfsf9,21950:up                                                                                                                                                                                                                                                                                                                                                                                                                                                      |
| cellular response to oxidative stress                        | GO:0034599 | 1.31E-01 | 2.25E-01 | Tnf,21926:up Akr1c18,105349:up Hp,15439:up Hmox1,15368:up Epas1,13819:up Bmp4,12159:up                                                                                                                                                                                                                                                                                                                                                                                                                                                  |
| maternal process involved in female pregnancy                | GO:0060135 | 1.32E-01 | 2.25E-01 | Vdr,22337:down Ptgs2,19225:down                                                                                                                                                                                                                                                                                                                                                                                                                                                                                                         |
| negative regulation of cellular response to insulin stimulus | GO:1900077 | 1.32E-01 | 2.25E-01 | Pparg,19016:up Enpp1,18605:down                                                                                                                                                                                                                                                                                                                                                                                                                                                                                                         |
| positive regulation of glucose metabolic process             | GO:0010907 | 1.32E-01 | 2.25E-01 | Igf2,16002:up Igf1,16000:up                                                                                                                                                                                                                                                                                                                                                                                                                                                                                                             |
| establishment or maintenance of bipolar cell polarity        | GO:0061245 | 1.32E-01 | 2.25E-01 | Ptk7,71461:down Wnt5a,22418:down                                                                                                                                                                                                                                                                                                                                                                                                                                                                                                        |
| regulation of amino acid transport                           | GO:0051955 | 1.32E-01 | 2.25E-01 | Tnf,21926:up Il1rn,16181:up                                                                                                                                                                                                                                                                                                                                                                                                                                                                                                             |
| sleep                                                        | GO:0030431 | 1.32E-01 | 2.25E-01 | Htr2a,15558:down Slc29a1,63959:up                                                                                                                                                                                                                                                                                                                                                                                                                                                                                                       |
| cardiac atrium development                                   | GO:0003230 | 1.32E-01 | 2.25E-01 | Wnt5a,22418:down Tgfb2,21808:down                                                                                                                                                                                                                                                                                                                                                                                                                                                                                                       |
| fatty acid derivative biosynthetic process                   | GO:1901570 | 1.32E-01 | 2.25E-01 | Ggt5,23887:up Ptgs2,19225:down                                                                                                                                                                                                                                                                                                                                                                                                                                                                                                          |
| establishment or maintenance of apical/basal cell polarity   | GO:0035088 | 1.32E-01 | 2.25E-01 | Ptk7,71461:down Wnt5a,22418:down                                                                                                                                                                                                                                                                                                                                                                                                                                                                                                        |
| icosanoid biosynthetic process                               | GO:0046456 | 1.32E-01 | 2.25E-01 | Ggt5,23887:up Ptgs2,19225:down                                                                                                                                                                                                                                                                                                                                                                                                                                                                                                          |
| axon regeneration                                            | GO:0031103 | 1.32E-01 | 2.25E-01 | Tnc,21923:down Mmp2,17390:down                                                                                                                                                                                                                                                                                                                                                                                                                                                                                                          |
| regulation of cardiac muscle cell apoptotic process          | GO:0010665 | 1.32E-01 | 2.25E-01 | Sfrp2,20319:up Igf1,16000:up                                                                                                                                                                                                                                                                                                                                                                                                                                                                                                            |

|                                                                                            |            |          |          |                                                                                                                                                                                                                                                                 |
|--------------------------------------------------------------------------------------------|------------|----------|----------|-----------------------------------------------------------------------------------------------------------------------------------------------------------------------------------------------------------------------------------------------------------------|
| brain morphogenesis                                                                        | GO:0048854 | 1.32E-01 | 2.25E-01 | Uchl5,56207:up Wnt5a,22418:down                                                                                                                                                                                                                                 |
| cellular response to corticosteroid stimulus                                               | GO:0071384 | 1.32E-01 | 2.25E-01 | Akr1c18,105349:up Bmp4,12159:up                                                                                                                                                                                                                                 |
| positive regulation of fatty acid metabolic process                                        | GO:0045923 | 1.32E-01 | 2.25E-01 | Pparg,19016:up Adipoq,11450:up                                                                                                                                                                                                                                  |
| pigment cell differentiation                                                               | GO:0050931 | 1.32E-01 | 2.25E-01 | Ednrb,13618:up Kitl,17311:up                                                                                                                                                                                                                                    |
| regulation of fatty acid metabolic process                                                 | GO:0019217 | 1.33E-01 | 2.27E-01 | Pparg,19016:up Fam132b,227358:down Adipoq,11450:up                                                                                                                                                                                                              |
| carboxylic acid transport                                                                  | GO:0046942 | 1.35E-01 | 2.27E-01 | Tnf,21926:up Pparg,19016:up Fam132b,227358:down Emb,13723:up Il1rn,16181:up Slc16a4,229699:down Serinc2,230779:down                                                                                                                                             |
| nitrogen compound transport                                                                | GO:0071705 | 1.35E-01 | 2.27E-01 | Slc29a1,63959:up Gpm6b,14758:up Cxcl12,20315:up Htr2a,15558:down Pparg,19016:up Tnf,21926:up Glp1r,14652:down Egfr,13649:down Sfrp1,20377:up C1qtnf3,81799:down Il1rn,16181:up Ptgs2,19225:down Sncg,20618:up Grem1,23892:up Maob,109731:up Serinc2,230779:down |
| negative regulation of protein secretion                                                   | GO:0050709 | 1.35E-01 | 2.27E-01 | Tnf,21926:up Gas6,14456:up Sfrp1,20377:up C1qtnf3,81799:down                                                                                                                                                                                                    |
| positive regulation of endopeptidase activity                                              | GO:0010950 | 1.35E-01 | 2.27E-01 | Tnf,21926:up Pparg,19016:up Sfrp2,20319:up F3,14066:up                                                                                                                                                                                                          |
| negative regulation of epidermal growth factor-activated receptor activity                 | GO:0007175 | 1.36E-01 | 2.27E-01 | Errfi1,74155:down                                                                                                                                                                                                                                               |
| positive regulation of voltage-gated calcium channel activity                              | GO:1901387 | 1.36E-01 | 2.27E-01 | S100a1,20193:up                                                                                                                                                                                                                                                 |
| regulation of hematopoietic stem cell proliferation                                        | GO:1902033 | 1.36E-01 | 2.27E-01 | Kitl,17311:up                                                                                                                                                                                                                                                   |
| positive regulation of acute inflammatory response to antigenic stimulus                   | GO:0002866 | 1.36E-01 | 2.27E-01 | C3,12266:up                                                                                                                                                                                                                                                     |
| lacrimal gland development                                                                 | GO:0032808 | 1.36E-01 | 2.27E-01 | Fgfr2,14183:up                                                                                                                                                                                                                                                  |
| negative regulation of muscle adaptation                                                   | GO:0014745 | 1.36E-01 | 2.27E-01 | Errfi1,74155:down                                                                                                                                                                                                                                               |
| negative regulation by host of viral transcription                                         | GO:0043922 | 1.36E-01 | 2.27E-01 | Ccl4,20303:up                                                                                                                                                                                                                                                   |
| inflammatory response to wounding                                                          | GO:0090594 | 1.36E-01 | 2.27E-01 | Hmox1,15368:up                                                                                                                                                                                                                                                  |
| regulation of dendritic cell chemotaxis                                                    | GO:2000508 | 1.36E-01 | 2.27E-01 | Gas6,14456:up                                                                                                                                                                                                                                                   |
| regulation of interferon-gamma-mediated signaling pathway                                  | GO:0060334 | 1.36E-01 | 2.27E-01 | Pparg,19016:up                                                                                                                                                                                                                                                  |
| regulation of natural killer cell mediated cytotoxicity directed against tumor cell target | GO:0002858 | 1.36E-01 | 2.27E-01 | Ceacam1,26365:up                                                                                                                                                                                                                                                |
| glomerular basement membrane development                                                   | GO:0032836 | 1.36E-01 | 2.27E-01 | Sulf1,240725:down                                                                                                                                                                                                                                               |
| very-low-density lipoprotein particle remodeling                                           | GO:0034372 | 1.36E-01 | 2.27E-01 | Lpl,16956:up                                                                                                                                                                                                                                                    |
| regulation of motor neuron apoptotic process                                               | GO:2000671 | 1.36E-01 | 2.27E-01 | Crlf1,12931:down                                                                                                                                                                                                                                                |
| cellular response to arsenic-containing substance                                          | GO:0071243 | 1.36E-01 | 2.27E-01 | Hmox1,15368:up                                                                                                                                                                                                                                                  |
| protein transport within lipid bilayer                                                     | GO:0032594 | 1.36E-01 | 2.27E-01 | Cd24a,12484:down                                                                                                                                                                                                                                                |
| regulation of CD8-positive, alpha-beta T cell activation                                   | GO:2001185 | 1.36E-01 | 2.27E-01 | Ceacam1,26365:up                                                                                                                                                                                                                                                |
| ectopic germ cell programmed cell death                                                    | GO:0035234 | 1.36E-01 | 2.27E-01 | Kitl,17311:up                                                                                                                                                                                                                                                   |
| negative regulation of pathway-restricted SMAD protein phosphorylation                     | GO:0060394 | 1.36E-01 | 2.27E-01 | Grem1,23892:up                                                                                                                                                                                                                                                  |
| regulation of apoptotic DNA fragmentation                                                  | GO:1902510 | 1.36E-01 | 2.27E-01 | Igfbp3,16009:up                                                                                                                                                                                                                                                 |

|                                                                                                                           |            |          |          |                   |
|---------------------------------------------------------------------------------------------------------------------------|------------|----------|----------|-------------------|
| anterior/posterior axis specification, embryo                                                                             | GO:0008595 | 1.36E-01 | 2.27E-01 | Wnt5a,22418:down  |
| tripartite regional subdivision                                                                                           | GO:0007351 | 1.36E-01 | 2.27E-01 | Wnt5a,22418:down  |
| regulation of cardiac muscle cell membrane potential                                                                      | GO:0086036 | 1.36E-01 | 2.27E-01 | Fxyd1,56188:up    |
| natural killer cell mediated immune response to tumor cell                                                                | GO:0002423 | 1.36E-01 | 2.27E-01 | Ceacam1,26365:up  |
| wound healing involved in inflammatory response                                                                           | GO:0002246 | 1.36E-01 | 2.27E-01 | Hmox1,15368:up    |
| positive regulation of interleukin-8 biosynthetic process                                                                 | GO:0045416 | 1.36E-01 | 2.27E-01 | Tnf,21926:up      |
| iron ion import into cell                                                                                                 | GO:0097459 | 1.36E-01 | 2.27E-01 | Trf,22041:up      |
| dorsal aorta development                                                                                                  | GO:0035907 | 1.36E-01 | 2.27E-01 | Bmpr1a,12166:down |
| calcium-independent cell-cell adhesion via plasma membrane cell-adhesion molecules                                        | GO:0016338 | 1.36E-01 | 2.27E-01 | Ceacam1,26365:up  |
| trachea cartilage development                                                                                             | GO:0060534 | 1.36E-01 | 2.27E-01 | Rspo2,239405:up   |
| negative regulation of mesoderm development                                                                               | GO:2000381 | 1.36E-01 | 2.27E-01 | Sfrp2,20319:up    |
| polyprenol metabolic process                                                                                              | GO:0016093 | 1.36E-01 | 2.27E-01 | Akr1c18,105349:up |
| regulation of cyclin-dependent protein serine/threonine kinase activity involved in G1/S transition of mitotic cell cycle | GO:0031657 | 1.36E-01 | 2.27E-01 | Egfr,13649:down   |
| regulation of transforming growth factor beta2 production                                                                 | GO:0032909 | 1.36E-01 | 2.27E-01 | Tgfb2,21808:down  |
| positive regulation of synaptic transmission, cholinergic                                                                 | GO:0032224 | 1.36E-01 | 2.27E-01 | Lama2,16773:down  |
| regulation of store-operated calcium channel activity                                                                     | GO:1901339 | 1.36E-01 | 2.27E-01 | Bmp4,12159:up     |
| hindgut morphogenesis                                                                                                     | GO:0007442 | 1.36E-01 | 2.27E-01 | Wnt5a,22418:down  |
| neuron cell-cell adhesion                                                                                                 | GO:0007158 | 1.36E-01 | 2.27E-01 | Ret,19713:up      |
| paraxial mesoderm formation                                                                                               | GO:0048341 | 1.36E-01 | 2.27E-01 | Wnt5a,22418:down  |
| cellular response to vitamin D                                                                                            | GO:0071305 | 1.36E-01 | 2.27E-01 | Vdr,22337:down    |
| negative regulation of neuroblast proliferation                                                                           | GO:0007406 | 1.36E-01 | 2.27E-01 | Cd24a,12484:down  |
| nucleoside salvage                                                                                                        | GO:0043174 | 1.36E-01 | 2.27E-01 | Uck2,80914:down   |
| natural killer cell mediated cytotoxicity directed against tumor cell target                                              | GO:0002420 | 1.36E-01 | 2.27E-01 | Ceacam1,26365:up  |
| ER-associated misfolded protein catabolic process                                                                         | GO:0071712 | 1.36E-01 | 2.27E-01 | Sdf2l1,64136:up   |
| snRNA transcription from RNA polymerase II promoter                                                                       | GO:0042795 | 1.36E-01 | 2.27E-01 | Ice1,218333:down  |
| post-embryonic camera-type eye development                                                                                | GO:0031077 | 1.36E-01 | 2.27E-01 | Vegfa,22339:down  |
| regulation of humoral immune response mediated by circulating immunoglobulin                                              | GO:0002923 | 1.36E-01 | 2.27E-01 | Tnf,21926:up      |
| cellular response to UV-B                                                                                                 | GO:0071493 | 1.36E-01 | 2.27E-01 | Mme,17380:up      |



|                                                                          |            |          |          |                                 |
|--------------------------------------------------------------------------|------------|----------|----------|---------------------------------|
| cellular divalent inorganic anion homeostasis                            | GO:0072501 | 1.36E-01 | 2.27E-01 | Enpp1,18605:down                |
| negative regulation of smooth muscle cell apoptotic process              | GO:0034392 | 1.36E-01 | 2.27E-01 | Igf1,16000:up                   |
| catagen                                                                  | GO:0042637 | 1.36E-01 | 2.27E-01 | Tgfb2,21808:down                |
| secondary heart field specification                                      | GO:0003139 | 1.36E-01 | 2.27E-01 | Bmp4,12159:up                   |
| negative regulation of myelination                                       | GO:0031642 | 1.36E-01 | 2.27E-01 | Tnf,21926:up                    |
| norepinephrine biosynthetic process                                      | GO:0042421 | 1.36E-01 | 2.27E-01 | Epas1,13819:up                  |
| positive regulation of protein localization to cell surface              | GO:2000010 | 1.36E-01 | 2.27E-01 | Tnf,21926:up                    |
| transforming growth factor beta2 production                              | GO:0032906 | 1.36E-01 | 2.27E-01 | Tgfb2,21808:down                |
| negative regulation of hormone metabolic process                         | GO:0032351 | 1.36E-01 | 2.27E-01 | Akr1c18,105349:up               |
| regulation of hyaluronan biosynthetic process                            | GO:1900125 | 1.36E-01 | 2.27E-01 | Has2,15117:down                 |
| isoprenoid catabolic process                                             | GO:0008300 | 1.36E-01 | 2.27E-01 | Akr1c18,105349:up               |
| regulation of serotonin secretion                                        | GO:0014062 | 1.36E-01 | 2.27E-01 | Maob,109731:up                  |
| regulation of plasminogen activation                                     | GO:0010755 | 1.36E-01 | 2.27E-01 | Serpine2,20720:up               |
| regulation of pigment cell differentiation                               | GO:0050932 | 1.36E-01 | 2.27E-01 | Kitl,17311:up                   |
| negative regulation of interleukin-1 secretion                           | GO:0050711 | 1.36E-01 | 2.27E-01 | Gas6,14456:up                   |
| regulation of leukocyte tethering or rolling                             | GO:1903236 | 1.36E-01 | 2.27E-01 | Cxcl12,20315:up                 |
| positive regulation of cAMP-mediated signaling                           | GO:0043950 | 1.36E-01 | 2.27E-01 | Ptgir,19222:up                  |
| positive regulation of monocyte chemotactic protein-1 production         | GO:0071639 | 1.36E-01 | 2.27E-01 | Adipoq,11450:up                 |
| visceral serous pericardium development                                  | GO:0061032 | 1.36E-01 | 2.27E-01 | Tgfb3,21814:up                  |
| regulation of natural killer cell mediated immune response to tumor cell | GO:0002855 | 1.36E-01 | 2.27E-01 | Ceacam1,26365:up                |
| regulation of follicle-stimulating hormone secretion                     | GO:0046880 | 1.36E-01 | 2.27E-01 | Inhba,16323:down                |
| negative regulation of keratinocyte differentiation                      | GO:0045617 | 1.36E-01 | 2.27E-01 | Tgfb2,21808:down                |
| IMP biosynthetic process                                                 | GO:0006188 | 1.36E-01 | 2.27E-01 | Ampd3,11717:up                  |
| positive regulation of penile erection                                   | GO:0060406 | 1.36E-01 | 2.27E-01 | Ednrb,13618:up                  |
| tissue regeneration                                                      | GO:0042246 | 1.38E-01 | 2.29E-01 | Ninj1,18081:up Igf1,16000:up    |
| regulation of sodium ion transmembrane transporter activity              | GO:2000649 | 1.38E-01 | 2.29E-01 | Fxyd1,56188:up Fxyd2,11936:up   |
| regulation of DNA-dependent DNA replication                              | GO:0090329 | 1.38E-01 | 2.29E-01 | Fgfr1,14182:down Bmp4,12159:up  |
| developmental induction                                                  | GO:0031128 | 1.38E-01 | 2.29E-01 | Fgfr1,14182:down Bmp4,12159:up  |
| negative regulation of mitotic nuclear division                          | GO:0045839 | 1.38E-01 | 2.29E-01 | Fgfr2,14183:up Bmp4,12159:up    |
| hydrogen peroxide metabolic process                                      | GO:0042743 | 1.38E-01 | 2.29E-01 | Pxdn,69675:down Hp,15439:up     |
| positive regulation of immunoglobulin production                         | GO:0002639 | 1.38E-01 | 2.29E-01 | Ceacam1,26365:up Tfrc,22042:up  |
| proteoglycan biosynthetic process                                        | GO:0030166 | 1.38E-01 | 2.29E-01 | Chst11,58250:down Igf1,16000:up |

|                                                       |            |          |          |                                                                                                                                                                                                                                                                                                                                                                                                                                                                                                                                                                                                                                                                                                                                                                                                                                                                                                                                                                                                                                                                                                                                                                                                                                                                                                                                                                                                                                                                                                                                                                                                                                                                      |
|-------------------------------------------------------|------------|----------|----------|----------------------------------------------------------------------------------------------------------------------------------------------------------------------------------------------------------------------------------------------------------------------------------------------------------------------------------------------------------------------------------------------------------------------------------------------------------------------------------------------------------------------------------------------------------------------------------------------------------------------------------------------------------------------------------------------------------------------------------------------------------------------------------------------------------------------------------------------------------------------------------------------------------------------------------------------------------------------------------------------------------------------------------------------------------------------------------------------------------------------------------------------------------------------------------------------------------------------------------------------------------------------------------------------------------------------------------------------------------------------------------------------------------------------------------------------------------------------------------------------------------------------------------------------------------------------------------------------------------------------------------------------------------------------|
| regulation of striated muscle cell apoptotic process  | GO:0010662 | 1.38E-01 | 2.29E-01 | Sfrp2,20319:up Igf1,16000:up                                                                                                                                                                                                                                                                                                                                                                                                                                                                                                                                                                                                                                                                                                                                                                                                                                                                                                                                                                                                                                                                                                                                                                                                                                                                                                                                                                                                                                                                                                                                                                                                                                         |
| positive regulation of cation channel activity        | GO:2001259 | 1.38E-01 | 2.29E-01 | S100a1,20193:up Bmp4,12159:up                                                                                                                                                                                                                                                                                                                                                                                                                                                                                                                                                                                                                                                                                                                                                                                                                                                                                                                                                                                                                                                                                                                                                                                                                                                                                                                                                                                                                                                                                                                                                                                                                                        |
| T-helper 1 type immune response                       | GO:0042088 | 1.38E-01 | 2.29E-01 | Vegfa,22339:down Il1r1,17082:down                                                                                                                                                                                                                                                                                                                                                                                                                                                                                                                                                                                                                                                                                                                                                                                                                                                                                                                                                                                                                                                                                                                                                                                                                                                                                                                                                                                                                                                                                                                                                                                                                                    |
| activin receptor signaling pathway                    | GO:0032924 | 1.38E-01 | 2.29E-01 | Fstl3,83554:down Inhba,16323:down                                                                                                                                                                                                                                                                                                                                                                                                                                                                                                                                                                                                                                                                                                                                                                                                                                                                                                                                                                                                                                                                                                                                                                                                                                                                                                                                                                                                                                                                                                                                                                                                                                    |
| camera-type eye morphogenesis                         | GO:0048593 | 1.38E-01 | 2.30E-01 | Vegfa,22339:down Aldh1a3,56847:down Col8a1,12837:down Bmp4,12159:up                                                                                                                                                                                                                                                                                                                                                                                                                                                                                                                                                                                                                                                                                                                                                                                                                                                                                                                                                                                                                                                                                                                                                                                                                                                                                                                                                                                                                                                                                                                                                                                                  |
| inorganic ion transmembrane transport                 | GO:0098660 | 1.40E-01 | 2.32E-01 | Htr2b,15559:down Gas6,14456:up Glp1r,14652:down Fxyd1,56188:up Kcnj15,16516:down Fxyd2,11936:up Bmp4,12159:up Ank,11732:down Tgfb2,21808:down Htr2a,15558:down S100a1,20193:up Slc40a1,53945:up                                                                                                                                                                                                                                                                                                                                                                                                                                                                                                                                                                                                                                                                                                                                                                                                                                                                                                                                                                                                                                                                                                                                                                                                                                                                                                                                                                                                                                                                      |
| negative regulation of neuron differentiation         | GO:0045665 | 1.40E-01 | 2.33E-01 | Plk2,20620:down Cd24a,12484:down Efemp1,216616:up Wnt5a,22418:down Dpysl3,22240:down Ednrb,13618:up                                                                                                                                                                                                                                                                                                                                                                                                                                                                                                                                                                                                                                                                                                                                                                                                                                                                                                                                                                                                                                                                                                                                                                                                                                                                                                                                                                                                                                                                                                                                                                  |
| nucleotide metabolic process                          | GO:0009117 | 1.41E-01 | 2.34E-01 | Htr2b,15559:down Adm,11535:up Wnt5a,22418:down Ampd3,11717:up Enpp5,83965:up Igf1,16000:up Vegfa,22339:down Gfpt2,14584:down Htr2a,15558:down Cbr2,12409:up Ptgir,19222:up Uck2,80914:down Enpp1,18605:down                                                                                                                                                                                                                                                                                                                                                                                                                                                                                                                                                                                                                                                                                                                                                                                                                                                                                                                                                                                                                                                                                                                                                                                                                                                                                                                                                                                                                                                          |
| energy reserve metabolic process                      | GO:0006112 | 1.41E-01 | 2.35E-01 | Enpp1,18605:down Igf2,16002:up Igf1,16000:up                                                                                                                                                                                                                                                                                                                                                                                                                                                                                                                                                                                                                                                                                                                                                                                                                                                                                                                                                                                                                                                                                                                                                                                                                                                                                                                                                                                                                                                                                                                                                                                                                         |
| protein complex localization                          | GO:0031503 | 1.42E-01 | 2.36E-01 | Tnf,21926:up C1qtnf3,81799:down Ptgs2,19225:down Grem1,23892:up                                                                                                                                                                                                                                                                                                                                                                                                                                                                                                                                                                                                                                                                                                                                                                                                                                                                                                                                                                                                                                                                                                                                                                                                                                                                                                                                                                                                                                                                                                                                                                                                      |
| lipid localization                                    | GO:0010876 | 1.42E-01 | 2.36E-01 | Tnf,21926:up Pparg,19016:up Lpl,16956:up Inhba,16323:down C3,12266:up Adipoq,11450:up Fam132b,227358:down Enpp1,18605:down                                                                                                                                                                                                                                                                                                                                                                                                                                                                                                                                                                                                                                                                                                                                                                                                                                                                                                                                                                                                                                                                                                                                                                                                                                                                                                                                                                                                                                                                                                                                           |
| cellular component organization or biogenesis         | GO:0071840 | 1.42E-01 | 2.36E-01 | Igf1,16000:up Adm,11535:up Flrt2,399558:down Plxnd1,67784:up Sfrp4,20379:up C3,12266:up Ankrd1,107765:down Ltbp2,16997:down Serpinh1,12406:down Igf1,16000:up Igf1,16000:up Lps,15891:up Loxl2,94352:down Plk2,20620:down Loxl3,16950:down Trf,22041:up Cd24a,12484:down Wnt5a,22418:down Mark1,226778:up Stc1,20855:up Adipoq,11450:up Bmp4,12159:up Igf1,16000:up Crabp2,12904:down Cxcl9,17329:up Tgfb2,21808:down Hpse,15442:up Fgfr2,14183:up Thbs2,21826:down Cthrc1,68588:down Prl2c2,18811:up Efemp1,216616:up Dpysl3,22240:down Vdr,22337:down Cxcl12,20315:up Mmp2,17390:down Smoc2,64074:down Gas6,14456:up Egfr,13649:down Col1a1,12814:down Sfrp1,20377:up C1qtnf3,81799:down Tgfb3,21814:up Sncg,20618:up Ceacam1,26365:up Ccl8,20307:up Sfrp2,20319:up Pxdn,69675:down Npnt,114249:up Tnfrsf11b,18383:up Sytn1,80976:up Col5a2,12832:down Igf1,16000:up Ccl2,20296:up Pdzn3,55983:down Pdgc,54635:down Mgp,17313:up Mmp13,17386:up Sema7a,20361:down Epas1,13819:up Htra3,78558:down Tnfrsf12a,27279:down Gpm6b,14758:up Shroom4,208431:down Postn,50706:down Ptx3,19288:up Ncam1,17967:down Ccl12,20293:up Wisp1,22402:down Tnc,21923:down Ret,19713:up Sdf2l1,64136:up Creb3l1,26427:down Fam101b,76566:down P4ha1,18451:down Lama2,16773:down Ptk7,71461:down Inhba,16323:down Ccl3,20302:up Srxp2,68792:down Plod2,26432:down Vegfa,22339:down Cbr2,12409:up Serpine2,20720:up Lrrc15,74488:down Igf2,16002:up Pparg,19016:up Tnf,21926:up Lmcd1,30937:up Col1a2,12843:down Fgfr1,14182:down Lpl,16956:up Hmox1,15368:up Has2,15117:down Sulf1,240725:down C1qtnf6,72709:down Grem1,23892:up Col3a1,12825:down Col5a1,12831:down Enpp1,18605:down |
| negative regulation of catabolic process              | GO:0009895 | 1.43E-01 | 2.37E-01 | Htr2b,15559:down Tnf,21926:up Egfr,13649:down Hp,15439:up Hmox1,15368:up Serpine2,20720:up                                                                                                                                                                                                                                                                                                                                                                                                                                                                                                                                                                                                                                                                                                                                                                                                                                                                                                                                                                                                                                                                                                                                                                                                                                                                                                                                                                                                                                                                                                                                                                           |
| auditory receptor cell differentiation                | GO:0042491 | 1.44E-01 | 2.39E-01 | Fgfr1,14182:down Mcoln3,171166:up                                                                                                                                                                                                                                                                                                                                                                                                                                                                                                                                                                                                                                                                                                                                                                                                                                                                                                                                                                                                                                                                                                                                                                                                                                                                                                                                                                                                                                                                                                                                                                                                                                    |
| androgen receptor signaling pathway                   | GO:0030521 | 1.44E-01 | 2.39E-01 | Sfrp1,20377:up Igf1,16000:up                                                                                                                                                                                                                                                                                                                                                                                                                                                                                                                                                                                                                                                                                                                                                                                                                                                                                                                                                                                                                                                                                                                                                                                                                                                                                                                                                                                                                                                                                                                                                                                                                                         |
| regulation of oligodendrocyte differentiation         | GO:0048713 | 1.44E-01 | 2.39E-01 | Pparg,19016:up Bmp4,12159:up                                                                                                                                                                                                                                                                                                                                                                                                                                                                                                                                                                                                                                                                                                                                                                                                                                                                                                                                                                                                                                                                                                                                                                                                                                                                                                                                                                                                                                                                                                                                                                                                                                         |
| head morphogenesis                                    | GO:0060323 | 1.44E-01 | 2.39E-01 | Tgfb2,21808:down Mmp2,17390:down                                                                                                                                                                                                                                                                                                                                                                                                                                                                                                                                                                                                                                                                                                                                                                                                                                                                                                                                                                                                                                                                                                                                                                                                                                                                                                                                                                                                                                                                                                                                                                                                                                     |
| positive regulation of glial cell differentiation     | GO:0045687 | 1.44E-01 | 2.39E-01 | Pparg,19016:up Serpine2,20720:up                                                                                                                                                                                                                                                                                                                                                                                                                                                                                                                                                                                                                                                                                                                                                                                                                                                                                                                                                                                                                                                                                                                                                                                                                                                                                                                                                                                                                                                                                                                                                                                                                                     |
| regulation of cell cycle process                      | GO:0010564 | 1.44E-01 | 2.39E-01 | Tnf,21926:up Plk2,20620:down Fgfr1,14182:down Egfr,13649:down Sfrp1,20377:up Wnt5a,22418:down SUSD2,71733:up Igf1,16000:up Bmp4,12159:up Fgfr2,14183:up Igf2,16002:up                                                                                                                                                                                                                                                                                                                                                                                                                                                                                                                                                                                                                                                                                                                                                                                                                                                                                                                                                                                                                                                                                                                                                                                                                                                                                                                                                                                                                                                                                                |
| inorganic cation transmembrane transport              | GO:0098662 | 1.44E-01 | 2.39E-01 | Htr2b,15559:down Gas6,14456:up Glp1r,14652:down Fxyd1,56188:up Kcnj15,16516:down Fxyd2,11936:up Bmp4,12159:up Tgfb2,21808:down Htr2a,15558:down S100a1,20193:up Slc40a1,53945:up                                                                                                                                                                                                                                                                                                                                                                                                                                                                                                                                                                                                                                                                                                                                                                                                                                                                                                                                                                                                                                                                                                                                                                                                                                                                                                                                                                                                                                                                                     |
| cell morphogenesis involved in neuron differentiation | GO:0048667 | 1.44E-01 | 2.39E-01 | Flrt2,399558:down Lama2,16773:down Plxnd1,67784:up Wnt5a,22418:down Sema7a,20361:down Tnfrsf12a,27279:down Crabp2,12904:down Ret,19713:up Cxcl12,20315:up Vegfa,22339:down Tgfb2,21808:down Fgfr2,14183:up                                                                                                                                                                                                                                                                                                                                                                                                                                                                                                                                                                                                                                                                                                                                                                                                                                                                                                                                                                                                                                                                                                                                                                                                                                                                                                                                                                                                                                                           |
| positive regulation of peptidase activity             | GO:0010952 | 1.45E-01 | 2.40E-01 | Tnf,21926:up Pparg,19016:up Sfrp2,20319:up F3,14066:up                                                                                                                                                                                                                                                                                                                                                                                                                                                                                                                                                                                                                                                                                                                                                                                                                                                                                                                                                                                                                                                                                                                                                                                                                                                                                                                                                                                                                                                                                                                                                                                                               |
| anion transmembrane transport                         | GO:0098656 | 1.45E-01 | 2.40E-01 | Ank,11732:down Fxyd1,56188:up Emb,13723:up Slc16a4,229699:down                                                                                                                                                                                                                                                                                                                                                                                                                                                                                                                                                                                                                                                                                                                                                                                                                                                                                                                                                                                                                                                                                                                                                                                                                                                                                                                                                                                                                                                                                                                                                                                                       |
| ribonucleoside diphosphate metabolic process          | GO:0009185 | 1.46E-01 | 2.41E-01 | Htr2a,15558:down Ampd3,11717:up Igf1,16000:up                                                                                                                                                                                                                                                                                                                                                                                                                                                                                                                                                                                                                                                                                                                                                                                                                                                                                                                                                                                                                                                                                                                                                                                                                                                                                                                                                                                                                                                                                                                                                                                                                        |
| negative regulation of lipid metabolic process        | GO:0045833 | 1.46E-01 | 2.41E-01 | Ceacam1,26365:up Tnf,21926:up Akr1c18,105349:up                                                                                                                                                                                                                                                                                                                                                                                                                                                                                                                                                                                                                                                                                                                                                                                                                                                                                                                                                                                                                                                                                                                                                                                                                                                                                                                                                                                                                                                                                                                                                                                                                      |
| regulation of sodium ion transport                    | GO:0002028 | 1.46E-01 | 2.41E-01 | Fxyd1,56188:up Serpine2,20720:up Fxyd2,11936:up                                                                                                                                                                                                                                                                                                                                                                                                                                                                                                                                                                                                                                                                                                                                                                                                                                                                                                                                                                                                                                                                                                                                                                                                                                                                                                                                                                                                                                                                                                                                                                                                                      |

|                                                                            |            |          |          |                                                                                                                                                                                                                                                                                                                                                                                                                                                                                                                                                                                     |
|----------------------------------------------------------------------------|------------|----------|----------|-------------------------------------------------------------------------------------------------------------------------------------------------------------------------------------------------------------------------------------------------------------------------------------------------------------------------------------------------------------------------------------------------------------------------------------------------------------------------------------------------------------------------------------------------------------------------------------|
| organonitrogen compound metabolic process                                  | GO:1901564 | 1.46E-01 | 2.42E-01 | Adm,11535:up Mmp13,17386:up Ampd3,11717:up Epas1,13819:up Ddah1,69219:down Gstt1,14871:up B lrb,233016:up Cdo1,12583:up Mamdc2,71738:down Ggt5,23887:up Fabbp5,16592:up Mme,17380:up Wnt5a,22418:down Maob,109731:up Hal,15109:up lgf1,16000:up Chst11,58250:down Gatm,67092:down Tgf b2,21808:down Pdkk,216134:up Ptgir,19222:up Htr2b,15559:down P4ha1,18451:down Gfpt2,14584:down Htr2a,15558:down Vegfa,22339:down Cbr2,12409:up Anpep,16790:up Tnf,21926:up Egfr,13649:down Hmox1,15368:up Has2,15117:down Serinc2,230779:down Gstm1,14862:up Uck2,80914:down Enpp1,18605:down |
| regulation of transmembrane transport                                      | GO:0034762 | 1.47E-01 | 2.42E-01 | Hvcn1,74096:up Fxyd1,56188:up Ccl12,20293:up Stc1,20855:up Kcnj15,16516:down Fxyd2,11936:up Bmp4,12159:up Cxcl12,20315:up Tgfb2,21808:down S100a1,20193:up                                                                                                                                                                                                                                                                                                                                                                                                                          |
| regionalization                                                            | GO:0003002 | 1.47E-01 | 2.43E-01 | Fgfr1,14182:down Sfrp1,20377:up Wnt5a,22418:down Bmpr1a,12166:down Aldh1a2,19378:up Grem1,23892:up Bmp4,12159:up Sfrp2,20319:up Fgfr2,14183:up                                                                                                                                                                                                                                                                                                                                                                                                                                      |
| response to reactive oxygen species                                        | GO:0000302 | 1.47E-01 | 2.43E-01 | Tnf,21926:up Akr1c18,105349:up Hp,15439:up Hmox1,15368:up Mmp2,17390:down                                                                                                                                                                                                                                                                                                                                                                                                                                                                                                           |
| steroid metabolic process                                                  | GO:0008202 | 1.48E-01 | 2.43E-01 | Vdr,22337:down Tnf,21926:up Akr1c18,105349:up Adm,11535:up Fgfr1,14182:down lgf2,16002:up lgf1,16000:up                                                                                                                                                                                                                                                                                                                                                                                                                                                                             |
| negative regulation of lymphocyte activation                               | GO:0051250 | 1.48E-01 | 2.43E-01 | Ceacam1,26365:up Cd24a,12484:down Sfrp1,20377:up Bmp4,12159:up                                                                                                                                                                                                                                                                                                                                                                                                                                                                                                                      |
| embryonic camera-type eye development                                      | GO:0031076 | 1.50E-01 | 2.43E-01 | Aldh1a2,19378:up Aldh1a3,56847:down                                                                                                                                                                                                                                                                                                                                                                                                                                                                                                                                                 |
| amino sugar metabolic process                                              | GO:0006040 | 1.50E-01 | 2.43E-01 | Gfpt2,14584:down Npl,74091:up                                                                                                                                                                                                                                                                                                                                                                                                                                                                                                                                                       |
| regulation of cellular carbohydrate catabolic process                      | GO:0043471 | 1.50E-01 | 2.43E-01 | Htr2a,15558:down lgf1,16000:up                                                                                                                                                                                                                                                                                                                                                                                                                                                                                                                                                      |
| embryo implantation                                                        | GO:0007566 | 1.50E-01 | 2.43E-01 | Ptgs2,19225:down Mmp2,17390:down                                                                                                                                                                                                                                                                                                                                                                                                                                                                                                                                                    |
| response to estradiol                                                      | GO:0032355 | 1.50E-01 | 2.43E-01 | Egfr,13649:down Mmp2,17390:down                                                                                                                                                                                                                                                                                                                                                                                                                                                                                                                                                     |
| regulation of carbohydrate catabolic process                               | GO:0043470 | 1.50E-01 | 2.43E-01 | Htr2a,15558:down lgf1,16000:up                                                                                                                                                                                                                                                                                                                                                                                                                                                                                                                                                      |
| positive regulation of glucose import                                      | GO:0046326 | 1.50E-01 | 2.43E-01 | lgf1,16000:up Adipoq,11450:up                                                                                                                                                                                                                                                                                                                                                                                                                                                                                                                                                       |
| negative regulation of blood circulation                                   | GO:1903523 | 1.50E-01 | 2.43E-01 | Adm,11535:up Mmp2,17390:down                                                                                                                                                                                                                                                                                                                                                                                                                                                                                                                                                        |
| positive regulation of organic acid transport                              | GO:0032892 | 1.50E-01 | 2.43E-01 | Fxyd1,56188:up Fam132b,227358:down                                                                                                                                                                                                                                                                                                                                                                                                                                                                                                                                                  |
| cell-cell signaling involved in cell fate commitment                       | GO:0045168 | 1.50E-01 | 2.43E-01 | Fgfr1,14182:down Bmp4,12159:up                                                                                                                                                                                                                                                                                                                                                                                                                                                                                                                                                      |
| positive regulation of cell-matrix adhesion                                | GO:0001954 | 1.50E-01 | 2.43E-01 | Vegfa,22339:down Ninj1,18081:up                                                                                                                                                                                                                                                                                                                                                                                                                                                                                                                                                     |
| multicellular organismal iron ion homeostasis                              | GO:0060586 | 1.51E-01 | 2.43E-01 | Slc40a1,53945:up                                                                                                                                                                                                                                                                                                                                                                                                                                                                                                                                                                    |
| development of secondary female sexual characteristics                     | GO:0046543 | 1.51E-01 | 2.43E-01 | Wnt5a,22418:down                                                                                                                                                                                                                                                                                                                                                                                                                                                                                                                                                                    |
| cellular response to ethanol                                               | GO:0071361 | 1.51E-01 | 2.43E-01 | Ccl7,20306:up                                                                                                                                                                                                                                                                                                                                                                                                                                                                                                                                                                       |
| regulation of nuclear cell cycle DNA replication                           | GO:0033262 | 1.51E-01 | 2.43E-01 | Fgfr1,14182:down                                                                                                                                                                                                                                                                                                                                                                                                                                                                                                                                                                    |
| hepatocyte growth factor receptor signaling pathway                        | GO:0048012 | 1.51E-01 | 2.43E-01 | Adams12,239337:down                                                                                                                                                                                                                                                                                                                                                                                                                                                                                                                                                                 |
| positive regulation of response to reactive oxygen species                 | GO:1901033 | 1.51E-01 | 2.43E-01 | Tnf,21926:up                                                                                                                                                                                                                                                                                                                                                                                                                                                                                                                                                                        |
| regulation of epithelial cell proliferation involved in lung morphogenesis | GO:2000794 | 1.51E-01 | 2.43E-01 | Fgfr2,14183:up                                                                                                                                                                                                                                                                                                                                                                                                                                                                                                                                                                      |
| complement activation, alternative pathway                                 | GO:0006957 | 1.51E-01 | 2.43E-01 | C3,12266:up                                                                                                                                                                                                                                                                                                                                                                                                                                                                                                                                                                         |
| negative regulation of synaptic transmission, glutamatergic                | GO:0051967 | 1.51E-01 | 2.43E-01 | Htr2a,15558:down                                                                                                                                                                                                                                                                                                                                                                                                                                                                                                                                                                    |
| negative regulation of activin receptor signaling pathway                  | GO:0032926 | 1.51E-01 | 2.43E-01 | Fstl3,83554:down                                                                                                                                                                                                                                                                                                                                                                                                                                                                                                                                                                    |
| positive regulation of myelination                                         | GO:0031643 | 1.51E-01 | 2.43E-01 | Trf,22041:up                                                                                                                                                                                                                                                                                                                                                                                                                                                                                                                                                                        |
| progesterone metabolic process                                             | GO:0042448 | 1.51E-01 | 2.43E-01 | Akr1c18,105349:up                                                                                                                                                                                                                                                                                                                                                                                                                                                                                                                                                                   |
| peptidyl-proline hydroxylation                                             | GO:0019511 | 1.51E-01 | 2.43E-01 | P4ha1,18451:down                                                                                                                                                                                                                                                                                                                                                                                                                                                                                                                                                                    |
| snRNA transcription                                                        | GO:0009301 | 1.51E-01 | 2.43E-01 | Ice1,218333:down                                                                                                                                                                                                                                                                                                                                                                                                                                                                                                                                                                    |

|                                                                                                                  |            |          |          |                    |
|------------------------------------------------------------------------------------------------------------------|------------|----------|----------|--------------------|
| Bergmann glial cell differentiation                                                                              | GO:0060020 | 1.51E-01 | 2.43E-01 | Plpp3,67916:up     |
| N-acetylneuraminic acid metabolic process                                                                        | GO:006054  | 1.51E-01 | 2.43E-01 | Npl,74091:up       |
| fructose metabolic process                                                                                       | GO:006000  | 1.51E-01 | 2.43E-01 | Sord,20322:up      |
| tangential migration from the subventricular zone to the olfactory bulb                                          | GO:0022028 | 1.51E-01 | 2.43E-01 | Fgfr1,14182:down   |
| Fc receptor signaling pathway                                                                                    | GO:0038093 | 1.51E-01 | 2.43E-01 | Clec4e,56619:up    |
| T-helper 17 cell lineage commitment                                                                              | GO:0072540 | 1.51E-01 | 2.43E-01 | Ly9,17085:up       |
| sphingolipid mediated signaling pathway                                                                          | GO:0090520 | 1.51E-01 | 2.43E-01 | Plpp3,67916:up     |
| negative regulation of glutamate secretion                                                                       | GO:0014050 | 1.51E-01 | 2.43E-01 | Il1rn,16181:up     |
| endothelial cell morphogenesis                                                                                   | GO:0001886 | 1.51E-01 | 2.43E-01 | Stc1,20855:up      |
| positive regulation of transcription from RNA polymerase II promoter in response to endoplasmic reticulum stress | GO:1990440 | 1.51E-01 | 2.43E-01 | Creb3l1,26427:down |
| hindgut development                                                                                              | GO:0061525 | 1.51E-01 | 2.43E-01 | Wnt5a,22418:down   |
| purine-containing compound salvage                                                                               | GO:0043101 | 1.51E-01 | 2.43E-01 | Ampd3,11717:up     |
| neural plate pattern specification                                                                               | GO:0060896 | 1.51E-01 | 2.43E-01 | Bmpr1a,12166:down  |
| negative regulation of sodium ion transport                                                                      | GO:0010766 | 1.51E-01 | 2.43E-01 | Serpine2,20720:up  |
| response to mercury ion                                                                                          | GO:0046689 | 1.51E-01 | 2.43E-01 | Gatm,67092:down    |
| negative regulation of thymocyte apoptotic process                                                               | GO:0070244 | 1.51E-01 | 2.43E-01 | Bmp4,12159:up      |
| negative regulation of T cell differentiation in thymus                                                          | GO:0033085 | 1.51E-01 | 2.43E-01 | Bmp4,12159:up      |
| regulation of hypersensitivity                                                                                   | GO:0002883 | 1.51E-01 | 2.43E-01 | C3,12266:up        |
| regulation of blood vessel remodeling                                                                            | GO:0060312 | 1.51E-01 | 2.43E-01 | Ceacam1,26365:up   |
| regulation of response to interferon-gamma                                                                       | GO:0060330 | 1.51E-01 | 2.43E-01 | Pparg,19016:up     |
| cysteine metabolic process                                                                                       | GO:0006534 | 1.51E-01 | 2.43E-01 | Cdo1,12583:up      |
| sodium ion export from cell                                                                                      | GO:0036376 | 1.51E-01 | 2.43E-01 | Fxyd1,56188:up     |
| negative regulation of myeloid leukocyte mediated immunity                                                       | GO:0002887 | 1.51E-01 | 2.43E-01 | Hmox1,15368:up     |
| regulation of glial cell migration                                                                               | GO:1903975 | 1.51E-01 | 2.43E-01 | Efemp1,216616:up   |
| otic vesicle morphogenesis                                                                                       | GO:0071600 | 1.51E-01 | 2.43E-01 | Fgfr2,14183:up     |
| renal system pattern specification                                                                               | GO:0072048 | 1.51E-01 | 2.43E-01 | Bmp4,12159:up      |
| negative regulation of phosphatidylinositol 3-kinase signaling                                                   | GO:0014067 | 1.51E-01 | 2.43E-01 | Serpine2,20720:up  |
| regulation of production of miRNAs involved in gene silencing by miRNA                                           | GO:1903798 | 1.51E-01 | 2.43E-01 | Egfr,13649:down    |
| insulin metabolic process                                                                                        | GO:1901142 | 1.51E-01 | 2.43E-01 | Ceacam1,26365:up   |
| regulation of removal of superoxide radicals                                                                     | GO:2000121 | 1.51E-01 | 2.43E-01 | Tnf,21926:up       |
| germ cell migration                                                                                              | GO:0008354 | 1.51E-01 | 2.43E-01 | Cxcl12,20315:up    |
| pattern specification involved in kidney development                                                             | GO:0061004 | 1.51E-01 | 2.43E-01 | Bmp4,12159:up      |
| endothelial cell progenitor proliferation                                                                        | GO:0070444 | 1.51E-01 | 2.43E-01 | Trf,22041:up       |

|                                                                             |            |          |          |                                                                                                                                                               |
|-----------------------------------------------------------------------------|------------|----------|----------|---------------------------------------------------------------------------------------------------------------------------------------------------------------|
| primitive streak formation                                                  | GO:009009  | 1.51E-01 | 2.43E-01 | Wnt5a,22418:down                                                                                                                                              |
| regulation of DNA catabolic process                                         | GO:1903624 | 1.51E-01 | 2.43E-01 | Igfbp3,16009:up                                                                                                                                               |
| liver regeneration                                                          | GO:0097421 | 1.51E-01 | 2.43E-01 | Hmox1,15368:up                                                                                                                                                |
| complement activation, lectin pathway                                       | GO:001867  | 1.51E-01 | 2.43E-01 | Serping1,12258:up                                                                                                                                             |
| immature B cell differentiation                                             | GO:002327  | 1.51E-01 | 2.43E-01 | Cd24a,12484:down                                                                                                                                              |
| cellular response to sterol                                                 | GO:0036315 | 1.51E-01 | 2.43E-01 | Inhba,16323:down                                                                                                                                              |
| negative regulation of humoral immune response                              | GO:002921  | 1.51E-01 | 2.43E-01 | Serping1,12258:up                                                                                                                                             |
| regulation of oligodendrocyte progenitor proliferation                      | GO:0070445 | 1.51E-01 | 2.43E-01 | Trf,22041:up                                                                                                                                                  |
| triglyceride-rich lipoprotein particle remodeling                           | GO:0034370 | 1.51E-01 | 2.43E-01 | Lpl,16956:up                                                                                                                                                  |
| eosinophil chemotaxis                                                       | GO:0048245 | 1.51E-01 | 2.43E-01 | Ccl2,20296:up                                                                                                                                                 |
| ribonucleoside monophosphate biosynthetic process                           | GO:0009156 | 1.52E-01 | 2.44E-01 | Htr2a,15558:down Uck2,80914:down Ampd3,11717:up Igf1,16000:up                                                                                                 |
| lipid homeostasis                                                           | GO:0055088 | 1.52E-01 | 2.44E-01 | Cd24a,12484:down Fabp4,11770:up Lpl,16956:up C1qtnf3,81799:down                                                                                               |
| regulation of synapse organization                                          | GO:0050807 | 1.52E-01 | 2.44E-01 | Srxp2,68792:down Flrt2,399558:down Wnt5a,22418:down Thbs2,21826:down                                                                                          |
| negative regulation of protein transport                                    | GO:0051224 | 1.52E-01 | 2.45E-01 | Kdelr3,105785:down Tnf,21926:up Gas6,14456:up Sfrp1,20377:up C1qtnf3,81799:down Adipoq,11450:up                                                               |
| cyclic nucleotide metabolic process                                         | GO:0009187 | 1.53E-01 | 2.45E-01 | Htr2b,15559:down Adm,11535:up Wnt5a,22418:down Vegfa,22339:down Ptgir,19222:up                                                                                |
| ribonucleotide metabolic process                                            | GO:0009259 | 1.54E-01 | 2.46E-01 | Htr2b,15559:down Adm,11535:up Wnt5a,22418:down Ampd3,11717:up Igf1,16000:up Htr2a,15558:down Vegfa,22339:down Ptgir,19222:up Uck2,80914:down Enpp1,18605:down |
| icosanoid metabolic process                                                 | GO:0006690 | 1.54E-01 | 2.47E-01 | Ggt5,23887:up Hpgd,15446:up Ptgs2,19225:down                                                                                                                  |
| cellular amino acid catabolic process                                       | GO:0009063 | 1.54E-01 | 2.47E-01 | Ddah1,69219:down Hal,15109:up Cdo1,12583:up                                                                                                                   |
| fatty acid derivative metabolic process                                     | GO:1901568 | 1.54E-01 | 2.47E-01 | Ggt5,23887:up Hpgd,15446:up Ptgs2,19225:down                                                                                                                  |
| regulation of gluconeogenesis                                               | GO:0006111 | 1.56E-01 | 2.50E-01 | C1qtnf3,81799:down Adipoq,11450:up                                                                                                                            |
| cardiac muscle cell apoptotic process                                       | GO:0010659 | 1.56E-01 | 2.50E-01 | Sfrp2,20319:up Igfbp3,16009:up                                                                                                                                |
| tetrapyrrole metabolic process                                              | GO:0033013 | 1.56E-01 | 2.50E-01 | Hmox1,15368:up Blvrb,233016:up                                                                                                                                |
| small molecule catabolic process                                            | GO:0044282 | 1.57E-01 | 2.51E-01 | Sord,20322:up Akr1c18,105349:up Ddah1,69219:down Npl,74091:up Hal,15109:up Cdo1,12583:up Adipoq,11450:up                                                      |
| phospholipase C-activating G-protein coupled receptor signaling pathway     | GO:0007200 | 1.58E-01 | 2.53E-01 | Htr2b,15559:down Htr2a,15558:down Ednrb,13618:up                                                                                                              |
| multicellular organismal response to stress                                 | GO:0033555 | 1.58E-01 | 2.53E-01 | Ncam1,17967:down Ret,19713:up Ednrb,13618:up                                                                                                                  |
| substrate adhesion-dependent cell spreading                                 | GO:0034446 | 1.58E-01 | 2.53E-01 | Has2,15117:down Sfrp1,20377:up Postn,50706:down                                                                                                               |
| in utero embryonic development                                              | GO:0001701 | 1.61E-01 | 2.57E-01 | Adm,11535:up Fgfr1,14182:down Egfr,13649:down Gjb5,14622:down Bmpr1a,12166:down Tgfr3,21814:up Igf1,16000:up Epas1,13819:up Vegfa,22339:down Fgfr2,14183:up   |
| specification of symmetry                                                   | GO:0009799 | 1.62E-01 | 2.59E-01 | Wnt5a,22418:down Aldh1a2,19378:up Grem1,23892:up Bmp4,12159:up                                                                                                |
| nucleoside monophosphate biosynthetic process                               | GO:0009124 | 1.62E-01 | 2.59E-01 | Htr2a,15558:down Uck2,80914:down Ampd3,11717:up Igf1,16000:up                                                                                                 |
| anterior/posterior pattern specification                                    | GO:0009952 | 1.63E-01 | 2.59E-01 | Sfrp2,20319:up Sfrp1,20377:up Wnt5a,22418:down Bmpr1a,12166:down Aldh1a2,19378:up Bmp4,12159:up                                                               |
| central nervous system neuron development                                   | GO:0021954 | 1.63E-01 | 2.59E-01 | Fgfr1,14182:down Wnt5a,22418:down Fgfr2,14183:up                                                                                                              |
| nucleotide catabolic process                                                | GO:0009166 | 1.63E-01 | 2.59E-01 | Htr2a,15558:down Enpp5,83965:up Igf1,16000:up                                                                                                                 |
| transition metal ion transport                                              | GO:0000041 | 1.63E-01 | 2.59E-01 | Trf,22041:up Tfrc,22042:up Slc40a1,53945:up                                                                                                                   |
| negative regulation of G-protein coupled receptor protein signaling pathway | GO:0045744 | 1.63E-01 | 2.59E-01 | Htr2b,15559:down Adm,11535:up                                                                                                                                 |

|                                                                         |            |          |          |                                                                                                                                                                                                                                                                                                                                                                                                                                                                                                                                                                                                                |
|-------------------------------------------------------------------------|------------|----------|----------|----------------------------------------------------------------------------------------------------------------------------------------------------------------------------------------------------------------------------------------------------------------------------------------------------------------------------------------------------------------------------------------------------------------------------------------------------------------------------------------------------------------------------------------------------------------------------------------------------------------|
| regulation of substrate adhesion-dependent cell spreading               | GO:1900024 | 1.63E-01 | 2.59E-01 | Has2,15117:down Postn,50706:down                                                                                                                                                                                                                                                                                                                                                                                                                                                                                                                                                                               |
| striated muscle cell apoptotic process                                  | GO:0010658 | 1.63E-01 | 2.59E-01 | Sfrp2,20319:up Igf1,16000:up                                                                                                                                                                                                                                                                                                                                                                                                                                                                                                                                                                                   |
| regulation of cellular amine metabolic process                          | GO:0033238 | 1.63E-01 | 2.59E-01 | Maob,109731:up Epas1,13819:up                                                                                                                                                                                                                                                                                                                                                                                                                                                                                                                                                                                  |
| regulation of cardiac muscle cell contraction                           | GO:0086004 | 1.63E-01 | 2.59E-01 | Fxyd1,56188:up Stc1,20855:up                                                                                                                                                                                                                                                                                                                                                                                                                                                                                                                                                                                   |
| regulation of response to reactive oxygen species                       | GO:1901031 | 1.63E-01 | 2.59E-01 | Tnf,21926:up Hp,15439:up                                                                                                                                                                                                                                                                                                                                                                                                                                                                                                                                                                                       |
| sodium ion homeostasis                                                  | GO:0055078 | 1.63E-01 | 2.59E-01 | Ednrb,13618:up Anpep,16790:up                                                                                                                                                                                                                                                                                                                                                                                                                                                                                                                                                                                  |
| regulation of mitotic cell cycle                                        | GO:0007346 | 1.64E-01 | 2.61E-01 | Tnf,21926:up Plk2,20620:down Fgfr1,14182:down Egfr,13649:down Igf1,16000:up Bmp4,12159:up Nabp1,109019:down Fgfr2,14183:up Igf2,16002:up                                                                                                                                                                                                                                                                                                                                                                                                                                                                       |
| positive regulation of mitotic cell cycle                               | GO:0045931 | 1.65E-01 | 2.61E-01 | Tnf,21926:up Fgfr1,14182:down Igf2,16002:up Igf1,16000:up                                                                                                                                                                                                                                                                                                                                                                                                                                                                                                                                                      |
| regulation of transcription from RNA polymerase II promoter             | GO:0006357 | 1.66E-01 | 2.61E-01 | Fstl3,83554:down Ednrb,13618:up Epas1,13819:up Ankrd1,107765:down Htra3,78558:down Sdpr,20324:down Wnt5a,22418:down Bmpr1a,12166:down Bmp4,12159:up Igf1,16000:up Creb3l1,26427:down Fgfr2,14183:up Prl2c2,18811:up Inhba,16323:down Ccl3,20302:up Vdr,22337:down Vegfa,22339:down Igf2,16002:up Slc40a1,53945:up Tnf,21926:up Pparg,19016:up Lmcd1,30937:up Glp1r,14652:down Egfr,13649:down Fgfr1,14182:down Sfrp1,20377:up Hmox1,15368:up Sulf1,240725:down Tgfb3,21814:up Grem1,23892:up Sfrp2,20319:up Npt1,114249:up S100a1,20193:up                                                                     |
| nucleobase-containing small molecule metabolic process                  | GO:0055086 | 1.66E-01 | 2.61E-01 | Htr2b,15559:down Adm,11535:up Wnt5a,22418:down Ampd3,11717:up Enpp5,83965:up Igf1,16000:up Vegfa,22339:down Gfpt2,14584:down Htr2a,15558:down Cbr2,12409:up Ptgir,19222:up Uck2,80914:down Enpp1,18605:down Enpp3,209558:down                                                                                                                                                                                                                                                                                                                                                                                  |
| catabolic process                                                       | GO:0009056 | 1.66E-01 | 2.61E-01 | Sfrp4,20379:up Mmp13,17386:up Enpp5,83965:up Uchl5,56207:up Sord,20322:up Ddah1,69219:down Blvrb,233016:up Npl,74091:up Igf1,16000:up Enpp3,209558:down Cdo1,12583:up Plk2,20620:down Akr1c18,105349:up Wnt5a,22418:down Maob,109731:up Adipoq,11450:up Hal,15109:up Igf1,16000:up Sdf2l1,64136:up Hpse,15442:up Mrc2,17534:down Htr2b,15559:down Hp,15439:up Dram1,71712:up Plod2,26432:down Htr2a,15558:down Serpine2,20720:up Mmp2,17390:down Adamts12,239337:down Anpep,16790:up Tnf,21926:up Lmcd1,30937:up Egfr,13649:down Lpl,16956:up Hmox1,15368:up Ceacam1,26365:up Pxdn,69675:down Enpp1,18605:down |
| determination of dorsal identity                                        | GO:0048263 | 1.67E-01 | 2.61E-01 | Grem1,23892:up                                                                                                                                                                                                                                                                                                                                                                                                                                                                                                                                                                                                 |
| regulation of glomerular mesangial cell proliferation                   | GO:0072124 | 1.67E-01 | 2.61E-01 | Bmp4,12159:up                                                                                                                                                                                                                                                                                                                                                                                                                                                                                                                                                                                                  |
| positive regulation of heterotypic cell-cell adhesion                   | GO:0034116 | 1.67E-01 | 2.61E-01 | Tnf,21926:up                                                                                                                                                                                                                                                                                                                                                                                                                                                                                                                                                                                                   |
| positive regulation of interleukin-5 production                         | GO:0032754 | 1.67E-01 | 2.61E-01 | Il1rl1,17082:down                                                                                                                                                                                                                                                                                                                                                                                                                                                                                                                                                                                              |
| leukotriene biosynthetic process                                        | GO:0019370 | 1.67E-01 | 2.61E-01 | Ggt5,23887:up                                                                                                                                                                                                                                                                                                                                                                                                                                                                                                                                                                                                  |
| ketone catabolic process                                                | GO:0042182 | 1.67E-01 | 2.61E-01 | Akr1c18,105349:up                                                                                                                                                                                                                                                                                                                                                                                                                                                                                                                                                                                              |
| vagina development                                                      | GO:0060068 | 1.67E-01 | 2.61E-01 | Wnt5a,22418:down                                                                                                                                                                                                                                                                                                                                                                                                                                                                                                                                                                                               |
| positive regulation of collateral sprouting                             | GO:0048672 | 1.67E-01 | 2.61E-01 | Crabp2,12904:down                                                                                                                                                                                                                                                                                                                                                                                                                                                                                                                                                                                              |
| positive regulation of interleukin-8 secretion                          | GO:2000484 | 1.67E-01 | 2.61E-01 | Wnt5a,22418:down                                                                                                                                                                                                                                                                                                                                                                                                                                                                                                                                                                                               |
| arginine catabolic process                                              | GO:0006527 | 1.67E-01 | 2.61E-01 | Ddah1,69219:down                                                                                                                                                                                                                                                                                                                                                                                                                                                                                                                                                                                               |
| positive regulation of T cell chemotaxis                                | GO:0010820 | 1.67E-01 | 2.61E-01 | Wnt5a,22418:down                                                                                                                                                                                                                                                                                                                                                                                                                                                                                                                                                                                               |
| hemoglobin biosynthetic process                                         | GO:0042541 | 1.67E-01 | 2.61E-01 | Inhba,16323:down                                                                                                                                                                                                                                                                                                                                                                                                                                                                                                                                                                                               |
| positive regulation of immunoglobulin secretion                         | GO:0051024 | 1.67E-01 | 2.61E-01 | Ceacam1,26365:up                                                                                                                                                                                                                                                                                                                                                                                                                                                                                                                                                                                               |
| cerebellar granular layer morphogenesis                                 | GO:0021683 | 1.67E-01 | 2.61E-01 | Serpine2,20720:up                                                                                                                                                                                                                                                                                                                                                                                                                                                                                                                                                                                              |
| negative regulation of substrate adhesion-dependent cell spreading      | GO:1900025 | 1.67E-01 | 2.61E-01 | Postn,50706:down                                                                                                                                                                                                                                                                                                                                                                                                                                                                                                                                                                                               |
| regulation of pancreatic juice secretion                                | GO:0090186 | 1.67E-01 | 2.61E-01 | Mmp13,17386:up                                                                                                                                                                                                                                                                                                                                                                                                                                                                                                                                                                                                 |
| chondrocyte differentiation involved in endochondral bone morphogenesis | GO:0003413 | 1.67E-01 | 2.61E-01 | Serpinh1,12406:down                                                                                                                                                                                                                                                                                                                                                                                                                                                                                                                                                                                            |
| mammary gland involution                                                | GO:0060056 | 1.67E-01 | 2.61E-01 | Vdr,22337:down                                                                                                                                                                                                                                                                                                                                                                                                                                                                                                                                                                                                 |

|                                                                                       |            |          |          |                    |
|---------------------------------------------------------------------------------------|------------|----------|----------|--------------------|
| regulation of integrin activation                                                     | GO:0033623 | 1.67E-01 | 2.61E-01 | Cd24a,12484:down   |
| hypersensitivity                                                                      | GO:0002524 | 1.67E-01 | 2.61E-01 | C3,12266:up        |
| cerebral cortex tangential migration                                                  | GO:0021800 | 1.67E-01 | 2.61E-01 | Fgfr1,14182:down   |
| regulation of oocyte development                                                      | GO:0060281 | 1.67E-01 | 2.61E-01 | Igf1,16000:up      |
| positive regulation of keratinocyte proliferation                                     | GO:0010838 | 1.67E-01 | 2.61E-01 | Has2,15117:down    |
| negative regulation of thymocyte aggregation                                          | GO:2000399 | 1.67E-01 | 2.61E-01 | Bmp4,12159:up      |
| regulation of production of small RNA involved in gene silencing by RNA               | GO:0070920 | 1.67E-01 | 2.61E-01 | Egfr,13649:down    |
| follicle-stimulating hormone secretion                                                | GO:0046884 | 1.67E-01 | 2.61E-01 | Inhba,16323:down   |
| limb bud formation                                                                    | GO:0060174 | 1.67E-01 | 2.61E-01 | Fgfr2,14183:up     |
| regulation of immature T cell proliferation in thymus                                 | GO:0033084 | 1.67E-01 | 2.61E-01 | Bmp4,12159:up      |
| Wnt signaling pathway involved in heart development                                   | GO:0003306 | 1.67E-01 | 2.61E-01 | Wnt5a,22418:down   |
| positive regulation of type I interferon-mediated signaling pathway                   | GO:0060340 | 1.67E-01 | 2.61E-01 | Wnt5a,22418:down   |
| 4-hydroxyproline metabolic process                                                    | GO:0019471 | 1.67E-01 | 2.61E-01 | P4ha1,18451:down   |
| motor neuron apoptotic process                                                        | GO:0097049 | 1.67E-01 | 2.61E-01 | Crlf1,12931:down   |
| hepatocyte differentiation                                                            | GO:0070365 | 1.67E-01 | 2.61E-01 | Bmp4,12159:up      |
| imidazole-containing compound metabolic process                                       | GO:0052803 | 1.67E-01 | 2.61E-01 | Hal,15109:up       |
| primitive hemopoiesis                                                                 | GO:0060215 | 1.67E-01 | 2.61E-01 | Vegfa,22339:down   |
| luteinization                                                                         | GO:0001553 | 1.67E-01 | 2.61E-01 | Inhba,16323:down   |
| positive regulation of cerebellar granule cell precursor proliferation                | GO:0021940 | 1.67E-01 | 2.61E-01 | Igf1,16000:up      |
| positive regulation of macrophage derived foam cell differentiation                   | GO:0010744 | 1.67E-01 | 2.61E-01 | Lpl,16956:up       |
| negative regulation of leukocyte degranulation                                        | GO:0043301 | 1.67E-01 | 2.61E-01 | Hmox1,15368:up     |
| embryonic viscerocranium morphogenesis                                                | GO:0048703 | 1.67E-01 | 2.61E-01 | Chst11,58250:down  |
| urinary bladder smooth muscle contraction                                             | GO:0014832 | 1.67E-01 | 2.61E-01 | Htr2a,15558:down   |
| regulation of secondary metabolic process                                             | GO:0043455 | 1.67E-01 | 2.61E-01 | Wnt5a,22418:down   |
| positive regulation of transcription from RNA polymerase III promoter                 | GO:0045945 | 1.67E-01 | 2.61E-01 | Ice1,218333:down   |
| glomerulus morphogenesis                                                              | GO:0072102 | 1.67E-01 | 2.61E-01 | Bmp4,12159:up      |
| mast cell chemotaxis                                                                  | GO:0002551 | 1.67E-01 | 2.61E-01 | Figf,14205:up      |
| sodium ion export                                                                     | GO:0071436 | 1.67E-01 | 2.61E-01 | Fxyd1,56188:up     |
| positive regulation of DNA damage response, signal transduction by p53 class mediator | GO:0043517 | 1.67E-01 | 2.61E-01 | Ankrd1,107765:down |
| negative regulation of cell maturation                                                | GO:1903430 | 1.67E-01 | 2.61E-01 | Ednrb,13618:up     |

|                                                                    |             |          |          |                                                                                                                                                                                                                                                                                                                                                                                                                                                                                                                                                              |
|--------------------------------------------------------------------|-------------|----------|----------|--------------------------------------------------------------------------------------------------------------------------------------------------------------------------------------------------------------------------------------------------------------------------------------------------------------------------------------------------------------------------------------------------------------------------------------------------------------------------------------------------------------------------------------------------------------|
| negative regulation of mast cell activation                        | GO:0033004  | 1.67E-01 | 2.61E-01 | Hmox1,15368:up                                                                                                                                                                                                                                                                                                                                                                                                                                                                                                                                               |
| regulation of penile erection                                      | GO:0060405  | 1.67E-01 | 2.61E-01 | Ednrb,13618:up                                                                                                                                                                                                                                                                                                                                                                                                                                                                                                                                               |
| cardiac muscle cell myoblast differentiation                       | GO:0060379  | 1.67E-01 | 2.61E-01 | Grem1,23892:up                                                                                                                                                                                                                                                                                                                                                                                                                                                                                                                                               |
| branchiomotor neuron axon guidance                                 | GO:0021785  | 1.67E-01 | 2.61E-01 | Plxnd1,67784:up                                                                                                                                                                                                                                                                                                                                                                                                                                                                                                                                              |
| determination of dorsal/ventral asymmetry                          | GO:0048262  | 1.67E-01 | 2.61E-01 | Grem1,23892:up                                                                                                                                                                                                                                                                                                                                                                                                                                                                                                                                               |
| response to progesterone                                           | GO:0032570  | 1.67E-01 | 2.61E-01 | Tgfb2,21808:down                                                                                                                                                                                                                                                                                                                                                                                                                                                                                                                                             |
| fructose 6-phosphate metabolic process                             | GO:0006002  | 1.67E-01 | 2.61E-01 | Gfpt2,14584:down                                                                                                                                                                                                                                                                                                                                                                                                                                                                                                                                             |
| righting reflex                                                    | GO:0060013  | 1.67E-01 | 2.61E-01 | Aldh1a3,56847:down                                                                                                                                                                                                                                                                                                                                                                                                                                                                                                                                           |
| phosphatidylserine metabolic process                               | GO:0006658  | 1.67E-01 | 2.61E-01 | Serinc2,230779:down                                                                                                                                                                                                                                                                                                                                                                                                                                                                                                                                          |
| negative regulation of neuron migration                            | GO:2001223  | 1.67E-01 | 2.61E-01 | Col3a1,12825:down                                                                                                                                                                                                                                                                                                                                                                                                                                                                                                                                            |
| transcription from RNA polymerase II promoter                      | GO:0006366  | 1.67E-01 | 2.61E-01 | Fstl3,83554:down Icfe1,218333:down Ednrb,13618:up Epas1,13819:up Ankrd1,107765:down Htra3,78558:down Sdpr,20324:down Wnt5a,22418:down Bmpr1a,12166:down Bmp4,12159:up Igf1,16000:up Creb3l1,26427:down Fgfr2,14183:up Pri2c2,18811:up Inhba,16323:down Ccl3,20302:up Vdr,22337:down Vegfa,22339:down Igf2,16002:up Slc40a1,53945:up Tnf,21926:up Pparg,19016:up Lmcd1,30937:up Glp1r,14652:down Egfr,13649:down Fgfr1,14182:down Sfrp1,20377:up Hmox1,15368:up Sulf1,240725:down Tgfb3,21814:up Grem1,23892:up Sfrp2,20319:up Npnt,114249:up S100a1,20193:up |
| homophilic cell adhesion via plasma membrane adhesion molecules    | GO:0007156  | 1.67E-01 | 2.61E-01 | Ceacam1,26365:up Pcdh19,279653:down Ret,19713:up                                                                                                                                                                                                                                                                                                                                                                                                                                                                                                             |
| regulation of calcium ion transport into cytosol                   | GO:0010522  | 1.67E-01 | 2.61E-01 | Tgfb2,21808:down Cd4,12504:up Bmp4,12159:up                                                                                                                                                                                                                                                                                                                                                                                                                                                                                                                  |
| DNA biosynthetic process                                           | GO:00071897 | 1.69E-01 | 2.64E-01 | Ankrd1,107765:down Pparg,19016:up Grem1,23892:up Adipoq,11450:up                                                                                                                                                                                                                                                                                                                                                                                                                                                                                             |
| positive regulation of calcium ion transport into cytosol          | GO:0010524  | 1.69E-01 | 2.64E-01 | Cd4,12504:up Bmp4,12159:up                                                                                                                                                                                                                                                                                                                                                                                                                                                                                                                                   |
| positive regulation of wound healing                               | GO:00090303 | 1.69E-01 | 2.64E-01 | Hpse,15442:up Plpp3,67916:up                                                                                                                                                                                                                                                                                                                                                                                                                                                                                                                                 |
| alcohol catabolic process                                          | GO:00046164 | 1.69E-01 | 2.64E-01 | Sord,20322:up Akr1c18,105349:up                                                                                                                                                                                                                                                                                                                                                                                                                                                                                                                              |
| cell differentiation involved in kidney development                | GO:00061005 | 1.69E-01 | 2.64E-01 | Bmp4,12159:up Adipoq,11450:up                                                                                                                                                                                                                                                                                                                                                                                                                                                                                                                                |
| endocrine pancreas development                                     | GO:00031018 | 1.69E-01 | 2.64E-01 | Wnt5a,22418:down Bmp4,12159:up                                                                                                                                                                                                                                                                                                                                                                                                                                                                                                                               |
| biological phase                                                   | GO:00044848 | 1.69E-01 | 2.64E-01 | Tgfb2,21808:down Ptgs2,19225:down                                                                                                                                                                                                                                                                                                                                                                                                                                                                                                                            |
| neuron maturation                                                  | GO:00042551 | 1.69E-01 | 2.64E-01 | Ret,19713:up Ednrb,13618:up                                                                                                                                                                                                                                                                                                                                                                                                                                                                                                                                  |
| negative regulation of lymphocyte differentiation                  | GO:00045620 | 1.69E-01 | 2.64E-01 | Sfrp1,20377:up Bmp4,12159:up                                                                                                                                                                                                                                                                                                                                                                                                                                                                                                                                 |
| cardiac muscle cell contraction                                    | GO:00086003 | 1.69E-01 | 2.64E-01 | Fxyd1,56188:up Stc1,20855:up                                                                                                                                                                                                                                                                                                                                                                                                                                                                                                                                 |
| positive regulation of cellular catabolic process                  | GO:00031331 | 1.70E-01 | 2.65E-01 | Tnf,21926:up Plk2,20620:down Lmcd1,30937:up Hmox1,15368:up Sfrp4,20379:up Igf1,16000:up Plod2,26432:down Htr2a,15558:down Igf1,16000:up                                                                                                                                                                                                                                                                                                                                                                                                                      |
| negative regulation of cellular macromolecule biosynthetic process | GO:2000113  | 1.71E-01 | 2.66E-01 | Sfrp4,20379:up Ednrb,13618:up Epas1,13819:up Ankrd1,107765:down Vdr,22337:down Fabp4,11770:up Vegfa,22339:down Gas6,14456:up Pparg,19016:up Tnf,21926:up Loxl2,94352:down Loxl3,16950:down Lmcd1,30937:up Fgfr1,14182:down Egfr,13649:down Hmox1,15368:up Sfrp1,20377:up Wnt5a,22418:down Grem1,23892:up Adipoq,11450:up Bmp4,12159:up Sfrp2,20319:up Enpp1,18605:down Fgfr2,14183:up S100a1,20193:up                                                                                                                                                        |
| negative regulation of hormone secretion                           | GO:00046888 | 1.72E-01 | 2.67E-01 | Pparg,19016:up Sfrp1,20377:up Adipoq,11450:up                                                                                                                                                                                                                                                                                                                                                                                                                                                                                                                |
| positive regulation of catabolic process                           | GO:0009896  | 1.72E-01 | 2.68E-01 | Tnf,21926:up Plk2,20620:down Lmcd1,30937:up Hmox1,15368:up Wnt5a,22418:down Sfrp4,20379:up Igf1,16000:up Plod2,26432:down Htr2a,15558:down Igf1,16000:up                                                                                                                                                                                                                                                                                                                                                                                                     |
| monocarboxylic acid transport                                      | GO:00015718 | 1.73E-01 | 2.69E-01 | Pparg,19016:up Fam132b,227358:down Emb,13723:up Slc16a4,229699:down                                                                                                                                                                                                                                                                                                                                                                                                                                                                                          |
| ribose phosphate metabolic process                                 | GO:00019693 | 1.74E-01 | 2.71E-01 | Htr2b,15559:down Adm,11535:up Wnt5a,22418:down Ampd3,11717:up Igf1,16000:up Htr2a,15558:down Vegfa,22339:down Ptgir,19222:up Uck2,80914:down Enpp1,18605:down                                                                                                                                                                                                                                                                                                                                                                                                |
| regulation of catabolic process                                    | GO:0009894  | 1.75E-01 | 2.72E-01 | Htr2b,15559:down Dram1,71712:up Hp,15439:up Sfrp4,20379:up Uchl5,56207:up Plod2,26432:down Htr2a,15558:down Igf1,16000:up Serpine2,20720:up Tnf,21926:up Lmcd1,30937:up Plk2,20620:down Egfr,13649:down Hmox1,15368:up Wnt5a,22418:down Igf1,16000:up                                                                                                                                                                                                                                                                                                        |
| regulation of glycoprotein metabolic process                       | GO:1903018  | 1.76E-01 | 2.73E-01 | Ptx3,19288:up Igf1,16000:up                                                                                                                                                                                                                                                                                                                                                                                                                                                                                                                                  |



|                                                                                 |            |          |          |                                                                                                                                                                                                                                                                                                                                                                                                                                                                                                                                                                                                                                                                                                                                                                                                                                                                                                                                                                                                                                                       |
|---------------------------------------------------------------------------------|------------|----------|----------|-------------------------------------------------------------------------------------------------------------------------------------------------------------------------------------------------------------------------------------------------------------------------------------------------------------------------------------------------------------------------------------------------------------------------------------------------------------------------------------------------------------------------------------------------------------------------------------------------------------------------------------------------------------------------------------------------------------------------------------------------------------------------------------------------------------------------------------------------------------------------------------------------------------------------------------------------------------------------------------------------------------------------------------------------------|
| inner ear receptor cell development                                             | GO:0060119 | 1.76E-01 | 2.73E-01 | Cthrc1,68588:down Fgfr1,14182:down                                                                                                                                                                                                                                                                                                                                                                                                                                                                                                                                                                                                                                                                                                                                                                                                                                                                                                                                                                                                                    |
| peptidyl-tyrosine autophosphorylation                                           | GO:0038083 | 1.76E-01 | 2.73E-01 | Vegfa,22339:down Grem1,23892:up                                                                                                                                                                                                                                                                                                                                                                                                                                                                                                                                                                                                                                                                                                                                                                                                                                                                                                                                                                                                                       |
| hair cell differentiation                                                       | GO:0035315 | 1.76E-01 | 2.73E-01 | Fgfr1,14182:down Mcoln3,171166:up                                                                                                                                                                                                                                                                                                                                                                                                                                                                                                                                                                                                                                                                                                                                                                                                                                                                                                                                                                                                                     |
| autonomic nervous system development                                            | GO:0048483 | 1.76E-01 | 2.73E-01 | Ret,19713:up Ednrb,13618:up                                                                                                                                                                                                                                                                                                                                                                                                                                                                                                                                                                                                                                                                                                                                                                                                                                                                                                                                                                                                                           |
| chaperone-mediated protein folding                                              | GO:0061077 | 1.76E-01 | 2.73E-01 | Fkbp10,14230:down Fkbp14,231997:down                                                                                                                                                                                                                                                                                                                                                                                                                                                                                                                                                                                                                                                                                                                                                                                                                                                                                                                                                                                                                  |
| positive regulation of muscle contraction                                       | GO:0045933 | 1.76E-01 | 2.73E-01 | Ptgs2,19225:down Npnt,114249:up                                                                                                                                                                                                                                                                                                                                                                                                                                                                                                                                                                                                                                                                                                                                                                                                                                                                                                                                                                                                                       |
| negative regulation of lipid biosynthetic process                               | GO:0051055 | 1.76E-01 | 2.73E-01 | Ceacam1,26365:up Akr1c18,105349:up                                                                                                                                                                                                                                                                                                                                                                                                                                                                                                                                                                                                                                                                                                                                                                                                                                                                                                                                                                                                                    |
| pyridine-containing compound metabolic process                                  | GO:0072524 | 1.76E-01 | 2.73E-01 | Htr2a,15558:down Pdxk,216134:up Cbr2,12409:up Igf1,16000:up                                                                                                                                                                                                                                                                                                                                                                                                                                                                                                                                                                                                                                                                                                                                                                                                                                                                                                                                                                                           |
| regulation of cyclic nucleotide metabolic process                               | GO:0030799 | 1.76E-01 | 2.73E-01 | Adm,11535:up Wnt5a,22418:down Vegfa,22339:down Ptgir,19222:up                                                                                                                                                                                                                                                                                                                                                                                                                                                                                                                                                                                                                                                                                                                                                                                                                                                                                                                                                                                         |
| positive regulation of cyclic nucleotide metabolic process                      | GO:0030801 | 1.76E-01 | 2.73E-01 | Adm,11535:up Wnt5a,22418:down Ptgir,19222:up                                                                                                                                                                                                                                                                                                                                                                                                                                                                                                                                                                                                                                                                                                                                                                                                                                                                                                                                                                                                          |
| limbic system development                                                       | GO:0021761 | 1.76E-01 | 2.73E-01 | Fgfr1,14182:down Aldh1a3,56847:down Fgfr2,14183:up                                                                                                                                                                                                                                                                                                                                                                                                                                                                                                                                                                                                                                                                                                                                                                                                                                                                                                                                                                                                    |
| cell fate specification                                                         | GO:0001708 | 1.76E-01 | 2.73E-01 | Sfrp2,20319:up Fgfr1,14182:down Bmpr1a,12166:down                                                                                                                                                                                                                                                                                                                                                                                                                                                                                                                                                                                                                                                                                                                                                                                                                                                                                                                                                                                                     |
| regulation of nitrogen compound metabolic process                               | GO:0051171 | 1.79E-01 | 2.77E-01 | Fstl3,83554:down Adm,11535:up Tfec,21426:up Sfrp4,20379:up Ankrd1,107765:down Lyl1,17095:up Igf1,16000:up Loxl2,94352:down Loxl3,16950:down Trf,22041:up Wnt5a,22418:down Maob,109731:up Adipoq,11450:up Bmp4,12159:up Igf1,16000:up Ptgir,19222:up Fgfr2,14183:up Pri2c2,18811:up Efemp1,216616:up Vdr,22337:down Fabp4,11770:up Htr2a,15558:down Oas3,246727:up Slc40a1,53945:up Gas6,14456:up Egfr,13649:down Sfrp1,20377:up Tgfb3,21814:up Tfrc,22042:up Sfrp2,20319:up Npnt,114249:up S100a1,20193:up Ice1,218333:down Ednrb,13618:up Pdgfc,54635:down Epas1,13819:up Uchl5,56207:up Htra3,78558:down Ddah1,69219:down Sdpr,20324:down Ptx3,19288:up Bmpr1a,12166:down Ccl4,20303:up Ret,19713:up Plpp3,67916:up Creb3l1,26427:down Kitl,17311:up Rasl1a,68895:up Inhba,16323:down Bnc2,242509:down Ccl3,20302:up Vegfa,22339:down Igf2,16002:up Tnf,21926:up Pparg,19016:up Lmcd1,30937:up Glp1r,14652:down Fgfr1,14182:down Hmox1,15368:up Has2,15117:down Sulf1,240725:down Ptgs2,19225:down Grem1,23892:up Phf11d,219132:up Tbx15,21384:down |
| positive regulation of multi-organism process                                   | GO:0043902 | 1.80E-01 | 2.77E-01 | Ceacam1,26365:up Inhba,16323:down Ednrb,13618:up Plat,18791:down                                                                                                                                                                                                                                                                                                                                                                                                                                                                                                                                                                                                                                                                                                                                                                                                                                                                                                                                                                                      |
| adherens junction organization                                                  | GO:0034332 | 1.81E-01 | 2.77E-01 | Gpm6b,14758:up Vegfa,22339:down Grem1,23892:up                                                                                                                                                                                                                                                                                                                                                                                                                                                                                                                                                                                                                                                                                                                                                                                                                                                                                                                                                                                                        |
| negative regulation of intracellular protein transport                          | GO:0090317 | 1.81E-01 | 2.77E-01 | Gas6,14456:up C1qtnf3,81799:down Adipoq,11450:up                                                                                                                                                                                                                                                                                                                                                                                                                                                                                                                                                                                                                                                                                                                                                                                                                                                                                                                                                                                                      |
| negative regulation of establishment of protein localization to plasma membrane | GO:0090005 | 1.82E-01 | 2.77E-01 | Lrrc15,74488:down                                                                                                                                                                                                                                                                                                                                                                                                                                                                                                                                                                                                                                                                                                                                                                                                                                                                                                                                                                                                                                     |
| notochord morphogenesis                                                         | GO:0048570 | 1.82E-01 | 2.77E-01 | Wnt5a,22418:down                                                                                                                                                                                                                                                                                                                                                                                                                                                                                                                                                                                                                                                                                                                                                                                                                                                                                                                                                                                                                                      |
| nephric duct development                                                        | GO:0072176 | 1.82E-01 | 2.77E-01 | Bmp4,12159:up                                                                                                                                                                                                                                                                                                                                                                                                                                                                                                                                                                                                                                                                                                                                                                                                                                                                                                                                                                                                                                         |
| regulation of endothelial cell development                                      | GO:1901550 | 1.82E-01 | 2.77E-01 | Tnf,21926:up                                                                                                                                                                                                                                                                                                                                                                                                                                                                                                                                                                                                                                                                                                                                                                                                                                                                                                                                                                                                                                          |
| cell-cell adhesion mediated by cadherin                                         | GO:0044331 | 1.82E-01 | 2.77E-01 | Wnt5a,22418:down                                                                                                                                                                                                                                                                                                                                                                                                                                                                                                                                                                                                                                                                                                                                                                                                                                                                                                                                                                                                                                      |
| interferon-gamma-mediated signaling pathway                                     | GO:0060333 | 1.82E-01 | 2.77E-01 | Pparg,19016:up                                                                                                                                                                                                                                                                                                                                                                                                                                                                                                                                                                                                                                                                                                                                                                                                                                                                                                                                                                                                                                        |
| positive regulation of dopamine secretion                                       | GO:0033603 | 1.82E-01 | 2.77E-01 | Cxcl12,20315:up                                                                                                                                                                                                                                                                                                                                                                                                                                                                                                                                                                                                                                                                                                                                                                                                                                                                                                                                                                                                                                       |
| regulation of brown fat cell differentiation                                    | GO:0090335 | 1.82E-01 | 2.77E-01 | Ptgs2,19225:down                                                                                                                                                                                                                                                                                                                                                                                                                                                                                                                                                                                                                                                                                                                                                                                                                                                                                                                                                                                                                                      |
| positive regulation of CREB transcription factor activity                       | GO:0032793 | 1.82E-01 | 2.77E-01 | Vegfa,22339:down                                                                                                                                                                                                                                                                                                                                                                                                                                                                                                                                                                                                                                                                                                                                                                                                                                                                                                                                                                                                                                      |
| regulation of T cell chemotaxis                                                 | GO:0010819 | 1.82E-01 | 2.77E-01 | Wnt5a,22418:down                                                                                                                                                                                                                                                                                                                                                                                                                                                                                                                                                                                                                                                                                                                                                                                                                                                                                                                                                                                                                                      |
| regulation of cellular response to vascular endothelial growth factor stimulus  | GO:1902547 | 1.82E-01 | 2.77E-01 | Adams12,239337:down                                                                                                                                                                                                                                                                                                                                                                                                                                                                                                                                                                                                                                                                                                                                                                                                                                                                                                                                                                                                                                   |
| protein nitrosylation                                                           | GO:0017014 | 1.82E-01 | 2.77E-01 | Ddah1,69219:down                                                                                                                                                                                                                                                                                                                                                                                                                                                                                                                                                                                                                                                                                                                                                                                                                                                                                                                                                                                                                                      |
| serine family amino acid catabolic process                                      | GO:0009071 | 1.82E-01 | 2.77E-01 | Cdo1,12583:up                                                                                                                                                                                                                                                                                                                                                                                                                                                                                                                                                                                                                                                                                                                                                                                                                                                                                                                                                                                                                                         |

|                                                            |            |          |          |                    |
|------------------------------------------------------------|------------|----------|----------|--------------------|
| heart field specification                                  | GO:0003128 | 1.82E-01 | 2.77E-01 | Bmp4,12159:up      |
| enamel mineralization                                      | GO:0070166 | 1.82E-01 | 2.77E-01 | Fam20a,208659:down |
| glomerular mesangial cell proliferation                    | GO:0072110 | 1.82E-01 | 2.77E-01 | Bmp4,12159:up      |
| response to low-density lipoprotein particle               | GO:0055098 | 1.82E-01 | 2.77E-01 | Pparg,19016:up     |
| positive regulation by host of viral process               | GO:0044794 | 1.82E-01 | 2.77E-01 | Ceacam1,26365:up   |
| embryonic camera-type eye formation                        | GO:0060900 | 1.82E-01 | 2.77E-01 | Aldh1a3,56847:down |
| macrophage activation involved in immune response          | GO:0002281 | 1.82E-01 | 2.77E-01 | Cx3cr1,13051:down  |
| regulation of establishment of endothelial barrier         | GO:1903140 | 1.82E-01 | 2.77E-01 | Tnf,21926:up       |
| nephric duct morphogenesis                                 | GO:0072178 | 1.82E-01 | 2.77E-01 | Bmp4,12159:up      |
| chondrocyte proliferation                                  | GO:0035988 | 1.82E-01 | 2.77E-01 | Stc1,20855:up      |
| urinary tract smooth muscle contraction                    | GO:0014848 | 1.82E-01 | 2.77E-01 | Htr2a,15558:down   |
| vocalization behavior                                      | GO:0071625 | 1.82E-01 | 2.77E-01 | Srpx2,68792:down   |
| T-helper cell lineage commitment                           | GO:0002295 | 1.82E-01 | 2.77E-01 | Ly9,17085:up       |
| retina vasculature morphogenesis in camera-type eye        | GO:0061299 | 1.82E-01 | 2.77E-01 | Vegfa,22339:down   |
| cellular response to gonadotropin stimulus                 | GO:0071371 | 1.82E-01 | 2.77E-01 | Inhba,16323:down   |
| IMP metabolic process                                      | GO:0046040 | 1.82E-01 | 2.77E-01 | Ampd3,11717:up     |
| mesonephric tubule formation                               | GO:0072172 | 1.82E-01 | 2.77E-01 | Grem1,23892:up     |
| dichotomous subdivision of an epithelial terminal unit     | GO:0060600 | 1.82E-01 | 2.77E-01 | Plxnd1,67784:up    |
| positive regulation of natural killer cell differentiation | GO:0032825 | 1.82E-01 | 2.77E-01 | Gas6,14456:up      |
| positive regulation of phagocytosis, engulfment            | GO:0060100 | 1.82E-01 | 2.77E-01 | Pparg,19016:up     |
| negative regulation of telomerase activity                 | GO:0051974 | 1.82E-01 | 2.77E-01 | Pparg,19016:up     |
| mitral valve morphogenesis                                 | GO:0003183 | 1.82E-01 | 2.77E-01 | Bmpr1a,12166:down  |
| collecting duct development                                | GO:0072044 | 1.82E-01 | 2.77E-01 | Bmp4,12159:up      |
| pyramidal neuron development                               | GO:0021860 | 1.82E-01 | 2.77E-01 | Fgfr2,14183:up     |
| positive regulation of urine volume                        | GO:0035810 | 1.82E-01 | 2.77E-01 | Ednrb,13618:up     |
| keratinocyte migration                                     | GO:0051546 | 1.82E-01 | 2.77E-01 | Has2,15117:down    |
| immature T cell proliferation in thymus                    | GO:0033080 | 1.82E-01 | 2.77E-01 | Bmp4,12159:up      |
| regulation of hydrogen peroxide metabolic process          | GO:0010310 | 1.82E-01 | 2.77E-01 | Hp,15439:up        |
| positive regulation of keratinocyte differentiation        | GO:0045618 | 1.82E-01 | 2.77E-01 | Vdr,22337:down     |
| positive regulation of superoxide anion generation         | GO:0032930 | 1.82E-01 | 2.77E-01 | Egfr,13649:down    |
| response to vitamin D                                      | GO:0033280 | 1.82E-01 | 2.77E-01 | Vdr,22337:down     |
| actin crosslink formation                                  | GO:0051764 | 1.82E-01 | 2.77E-01 | Dpysl3,22240:down  |
| diet induced thermogenesis                                 | GO:0002024 | 1.82E-01 | 2.77E-01 | Pparg,19016:up     |
| positive regulation of interleukin-17 production           | GO:0032740 | 1.82E-01 | 2.77E-01 | Ly9,17085:up       |

|                                                      |            |          |          |                                                                                                                                                                                  |
|------------------------------------------------------|------------|----------|----------|----------------------------------------------------------------------------------------------------------------------------------------------------------------------------------|
| regulation of myoblast proliferation                 | GO:2000291 | 1.82E-01 | 2.77E-01 | Igf1,16000:up                                                                                                                                                                    |
| androgen biosynthetic process                        | GO:0006702 | 1.82E-01 | 2.77E-01 | Akr1c18,105349:up                                                                                                                                                                |
| positive regulation of renal sodium excretion        | GO:0035815 | 1.82E-01 | 2.77E-01 | Ednrb,13618:up                                                                                                                                                                   |
| negative regulation of dendritic spine development   | GO:0061000 | 1.82E-01 | 2.77E-01 | Plk2,20620:down                                                                                                                                                                  |
| modulation by host of viral genome replication       | GO:0044827 | 1.82E-01 | 2.77E-01 | Ceacam1,26365:up                                                                                                                                                                 |
| regulation of neurotransmitter uptake                | GO:0051580 | 1.82E-01 | 2.77E-01 | Gpm6b,14758:up                                                                                                                                                                   |
| neurotransmitter catabolic process                   | GO:0042135 | 1.82E-01 | 2.77E-01 | Maob,109731:up                                                                                                                                                                   |
| negative regulation of cell fate commitment          | GO:0010454 | 1.82E-01 | 2.77E-01 | Sfrp2,20319:up                                                                                                                                                                   |
| glutathione biosynthetic process                     | GO:0006750 | 1.82E-01 | 2.77E-01 | Ggt5,23887:up                                                                                                                                                                    |
| response to axon injury                              | GO:0048678 | 1.82E-01 | 2.77E-01 | Tnc,21923:down Mmp2,17390:down                                                                                                                                                   |
| regulation of myeloid leukocyte mediated immunity    | GO:0002886 | 1.82E-01 | 2.77E-01 | Hmox1,15368:up C3,12266:up                                                                                                                                                       |
| regulation of coenzyme metabolic process             | GO:0051196 | 1.82E-01 | 2.77E-01 | Htr2a,15558:down Igf1,16000:up                                                                                                                                                   |
| regulation of sodium ion transmembrane transport     | GO:1902305 | 1.82E-01 | 2.77E-01 | Fxyd1,56188:up Fxyd2,11936:up                                                                                                                                                    |
| positive regulation of blood pressure                | GO:0045777 | 1.82E-01 | 2.77E-01 | Glp1r,14652:down Adipoq,11450:up                                                                                                                                                 |
| ribonucleotide biosynthetic process                  | GO:0009260 | 1.82E-01 | 2.77E-01 | Htr2b,15559:down Adm,11535:up Htr2a,15558:down Ptgir,19222:up Uck2,80914:down Ampd3,11717:up Igf1,16000:up                                                                       |
| response to virus                                    | GO:0009615 | 1.82E-01 | 2.77E-01 | Tnf,21926:up Lmcd1,30937:up Cxc19,17329:up Oasl1,231655:up Iffit1,15957:up Oas3,246727:up Iffit3,15959:up                                                                        |
| regulation of cell shape                             | GO:0008360 | 1.83E-01 | 2.78E-01 | Vegfa,22339:down Ccl2,20296:up Ccl12,20293:up Ccl3,20302:up                                                                                                                      |
| negative regulation of neuron projection development | GO:0010977 | 1.83E-01 | 2.78E-01 | Plk2,20620:down Efemp1,216616:up Wnt5a,22418:down Dpysl3,22240:down                                                                                                              |
| unsaturated fatty acid metabolic process             | GO:0033559 | 1.85E-01 | 2.81E-01 | Ggt5,23887:up Hpgd,15446:up Ptgs2,19225:down                                                                                                                                     |
| positive regulation of neuron death                  | GO:1901216 | 1.85E-01 | 2.81E-01 | Tnf,21926:up Tgfb2,21808:down Ccl3,20302:up                                                                                                                                      |
| T cell differentiation                               | GO:0030217 | 1.86E-01 | 2.82E-01 | Ctla2a,13024:down Ly9,17085:up Cd4,12504:up Clec4e,56619:up Tnfsf9,21950:up Bmp4,12159:up                                                                                        |
| cellular response to external stimulus               | GO:0071496 | 1.87E-01 | 2.84E-01 | Gas6,14456:up Lmcd1,30937:up Hmox1,15368:up Sfrp4,20379:up Tfrc,22042:up Ankrd1,107765:down Vdr,22337:down Sfrp2,20319:up Plod2,26432:down Postn,50706:down                      |
| membrane protein proteolysis                         | GO:0033619 | 1.89E-01 | 2.85E-01 | Tnf,21926:up Ret,19713:up                                                                                                                                                        |
| cellular modified amino acid biosynthetic process    | GO:0042398 | 1.89E-01 | 2.85E-01 | Ggt5,23887:up Gatm,67092:down                                                                                                                                                    |
| regulation of cofactor metabolic process             | GO:0051193 | 1.89E-01 | 2.85E-01 | Htr2a,15558:down Igf1,16000:up                                                                                                                                                   |
| defense response to Gram-negative bacterium          | GO:0050829 | 1.89E-01 | 2.85E-01 | Adm,11535:up Cd4,12504:up                                                                                                                                                        |
| protein localization to cell surface                 | GO:0034394 | 1.89E-01 | 2.85E-01 | Tnf,21926:up Gpm6b,14758:up                                                                                                                                                      |
| T cell selection                                     | GO:0045058 | 1.89E-01 | 2.85E-01 | Ly9,17085:up Cd4,12504:up                                                                                                                                                        |
| regulation of actin filament-based movement          | GO:1903115 | 1.89E-01 | 2.85E-01 | Fxyd1,56188:up Stc1,20855:up                                                                                                                                                     |
| unsaturated fatty acid biosynthetic process          | GO:0006636 | 1.89E-01 | 2.85E-01 | Ggt5,23887:up Ptgs2,19225:down                                                                                                                                                   |
| anterior/posterior axis specification                | GO:0009948 | 1.89E-01 | 2.85E-01 | Wnt5a,22418:down Bmp4,12159:up                                                                                                                                                   |
| cation transmembrane transport                       | GO:0098655 | 1.89E-01 | 2.86E-01 | Htr2b,15559:down Gas6,14456:up Glp1r,14652:down Fxyd1,56188:up Kcnj15,16516:down Fxyd2,11936:up Bmp4,12159:up Tgfb2,21808:down Htr2a,15558:down S100a1,20193:up Slc40a1,53945:up |
| ribose phosphate biosynthetic process                | GO:0046390 | 1.90E-01 | 2.86E-01 | Htr2b,15559:down Adm,11535:up Htr2a,15558:down Ptgir,19222:up Uck2,80914:down Ampd3,11717:up Igf1,16000:up                                                                       |
| pyruvate metabolic process                           | GO:0006090 | 1.90E-01 | 2.86E-01 | Htr2a,15558:down Igf1,16000:up Cdo1,12583:up                                                                                                                                     |
| negative regulation of T cell activation             | GO:0050868 | 1.90E-01 | 2.86E-01 | Ceacam1,26365:up Cd24a,12484:down Bmp4,12159:up                                                                                                                                  |

|                                                                        |            |          |          |                                                                                                                                                                                                                |
|------------------------------------------------------------------------|------------|----------|----------|----------------------------------------------------------------------------------------------------------------------------------------------------------------------------------------------------------------|
| sensory perception                                                     | GO:0007600 | 1.93E-01 | 2.91E-01 | Tnf,21926:up Fgfr1,14182:down Col11a1,12814:down Ncam1,17967:down Mme,17380:up Ptgs2,19225:down Il1rn,16181:up Ednrb,13618:up lgf1,16000:up Epas1,13819:up Mcoln3,171166:up Htr2a,15558:down Serpine2,20720:up |
| glycerophospholipid biosynthetic process                               | GO:0046474 | 1.94E-01 | 2.92E-01 | Htr2b,15559:down Fabp5,16592:up Htr2a,15558:down                                                                                                                                                               |
| cAMP-mediated signaling                                                | GO:0019933 | 1.95E-01 | 2.92E-01 | Glp1r,14652:down Ptgir,19222:up                                                                                                                                                                                |
| cellular response to dsRNA                                             | GO:0071359 | 1.95E-01 | 2.92E-01 | Egfr,13649:down Ifit1,15957:up                                                                                                                                                                                 |
| negative regulation of nuclear division                                | GO:0051784 | 1.95E-01 | 2.92E-01 | Fgfr2,14183:up Bmp4,12159:up                                                                                                                                                                                   |
| response to cAMP                                                       | GO:0051591 | 1.95E-01 | 2.92E-01 | Cdo1,12583:up Adipoq,11450:up                                                                                                                                                                                  |
| lipopolysaccharide-mediated signaling pathway                          | GO:0031663 | 1.95E-01 | 2.92E-01 | Tnf,21926:up Ccl12,20293:up                                                                                                                                                                                    |
| citrulline metabolic process                                           | GO:0000052 | 1.97E-01 | 2.92E-01 | Ddah1,69219:down                                                                                                                                                                                               |
| regulation of glomerular filtration                                    | GO:0003093 | 1.97E-01 | 2.92E-01 | Gas6,14456:up                                                                                                                                                                                                  |
| pyramidal neuron differentiation                                       | GO:0021859 | 1.97E-01 | 2.92E-01 | Fgfr2,14183:up                                                                                                                                                                                                 |
| angiogenesis involved in wound healing                                 | GO:0060055 | 1.97E-01 | 2.92E-01 | Hpse,15442:up                                                                                                                                                                                                  |
| lens fiber cell development                                            | GO:0070307 | 1.97E-01 | 2.92E-01 | Fgfr2,14183:up                                                                                                                                                                                                 |
| positive regulation of podosome assembly                               | GO:0071803 | 1.97E-01 | 2.92E-01 | Tnf,21926:up                                                                                                                                                                                                   |
| regulation of synaptic transmission, cholinergic                       | GO:0032222 | 1.97E-01 | 2.92E-01 | Lama2,16773:down                                                                                                                                                                                               |
| negative regulation of release of sequestered calcium ion into cytosol | GO:0051280 | 1.97E-01 | 2.92E-01 | Tgfb2,21808:down                                                                                                                                                                                               |
| regulation of immature T cell proliferation                            | GO:0033083 | 1.97E-01 | 2.92E-01 | Bmp4,12159:up                                                                                                                                                                                                  |
| regulation of centriole replication                                    | GO:0046599 | 1.97E-01 | 2.92E-01 | Plk2,20620:down                                                                                                                                                                                                |
| positive regulation of astrocyte differentiation                       | GO:0048711 | 1.97E-01 | 2.92E-01 | Serpine2,20720:up                                                                                                                                                                                              |
| dendritic cell chemotaxis                                              | GO:0002407 | 1.97E-01 | 2.92E-01 | Gas6,14456:up                                                                                                                                                                                                  |
| cellular response to hepatocyte growth factor stimulus                 | GO:0035729 | 1.97E-01 | 2.92E-01 | Adamts12,239337:down                                                                                                                                                                                           |
| positive regulation of membrane protein ectodomain proteolysis         | GO:0051044 | 1.97E-01 | 2.92E-01 | Tnf,21926:up                                                                                                                                                                                                   |
| positive regulation of transcription from RNA polymerase I promoter    | GO:0045943 | 1.97E-01 | 2.92E-01 | Rasl11a,68895:up                                                                                                                                                                                               |
| positive regulation of immune response to tumor cell                   | GO:0002839 | 1.97E-01 | 2.92E-01 | Cd24a,12484:down                                                                                                                                                                                               |
| cellular response to platelet-derived growth factor stimulus           | GO:0036120 | 1.97E-01 | 2.92E-01 | Has2,15117:down                                                                                                                                                                                                |
| regulation of interleukin-8 biosynthetic process                       | GO:0045414 | 1.97E-01 | 2.92E-01 | Tnf,21926:up                                                                                                                                                                                                   |
| positive regulation of response to tumor cell                          | GO:0002836 | 1.97E-01 | 2.92E-01 | Cd24a,12484:down                                                                                                                                                                                               |
| branching morphogenesis of a nerve                                     | GO:0048755 | 1.97E-01 | 2.92E-01 | Fgfr2,14183:up                                                                                                                                                                                                 |
| blastoderm segmentation                                                | GO:0007350 | 1.97E-01 | 2.92E-01 | Wnt5a,22418:down                                                                                                                                                                                               |
| mitral valve development                                               | GO:0003174 | 1.97E-01 | 2.92E-01 | Bmpr1a,12166:down                                                                                                                                                                                              |
| insemination                                                           | GO:0007320 | 1.97E-01 | 2.92E-01 | Serpine2,20720:up                                                                                                                                                                                              |
| development of secondary sexual characteristics                        | GO:0045136 | 1.97E-01 | 2.92E-01 | Wnt5a,22418:down                                                                                                                                                                                               |
| glycoside metabolic process                                            | GO:0016137 | 1.97E-01 | 2.92E-01 | Akr1c18,105349:up                                                                                                                                                                                              |
| positive regulation of gene silencing by miRNA                         | GO:2000637 | 1.97E-01 | 2.92E-01 | Egfr,13649:down                                                                                                                                                                                                |

|                                                                                    |            |          |          |                                                                                                                                                                                                                                                                                                                                                                                                                                                                                                                                                                                                                                                                                                                                                                                                                                                                                                                                                                                                                                                                                                                                                                                                                                                                                                                                                                                                                                                                                                                                                                                                                                                                                                                                                                                                                                                                                                                                |
|------------------------------------------------------------------------------------|------------|----------|----------|--------------------------------------------------------------------------------------------------------------------------------------------------------------------------------------------------------------------------------------------------------------------------------------------------------------------------------------------------------------------------------------------------------------------------------------------------------------------------------------------------------------------------------------------------------------------------------------------------------------------------------------------------------------------------------------------------------------------------------------------------------------------------------------------------------------------------------------------------------------------------------------------------------------------------------------------------------------------------------------------------------------------------------------------------------------------------------------------------------------------------------------------------------------------------------------------------------------------------------------------------------------------------------------------------------------------------------------------------------------------------------------------------------------------------------------------------------------------------------------------------------------------------------------------------------------------------------------------------------------------------------------------------------------------------------------------------------------------------------------------------------------------------------------------------------------------------------------------------------------------------------------------------------------------------------|
| regulation of extracellular matrix disassembly                                     | GO:0010715 | 1.97E-01 | 2.92E-01 | Tgfb2,21808:down                                                                                                                                                                                                                                                                                                                                                                                                                                                                                                                                                                                                                                                                                                                                                                                                                                                                                                                                                                                                                                                                                                                                                                                                                                                                                                                                                                                                                                                                                                                                                                                                                                                                                                                                                                                                                                                                                                               |
| UDP-N-acetylglucosamine metabolic process                                          | GO:0006047 | 1.97E-01 | 2.92E-01 | Gfpt2,14584:down                                                                                                                                                                                                                                                                                                                                                                                                                                                                                                                                                                                                                                                                                                                                                                                                                                                                                                                                                                                                                                                                                                                                                                                                                                                                                                                                                                                                                                                                                                                                                                                                                                                                                                                                                                                                                                                                                                               |
| negative regulation of acute inflammatory response                                 | GO:0002674 | 1.97E-01 | 2.92E-01 | Pparg,19016:up                                                                                                                                                                                                                                                                                                                                                                                                                                                                                                                                                                                                                                                                                                                                                                                                                                                                                                                                                                                                                                                                                                                                                                                                                                                                                                                                                                                                                                                                                                                                                                                                                                                                                                                                                                                                                                                                                                                 |
| negative regulation of receptor binding                                            | GO:1900121 | 1.97E-01 | 2.92E-01 | Adipoq,11450:up                                                                                                                                                                                                                                                                                                                                                                                                                                                                                                                                                                                                                                                                                                                                                                                                                                                                                                                                                                                                                                                                                                                                                                                                                                                                                                                                                                                                                                                                                                                                                                                                                                                                                                                                                                                                                                                                                                                |
| positive regulation of Rho protein signal transduction                             | GO:0035025 | 1.97E-01 | 2.92E-01 | Col3a1,12825:down                                                                                                                                                                                                                                                                                                                                                                                                                                                                                                                                                                                                                                                                                                                                                                                                                                                                                                                                                                                                                                                                                                                                                                                                                                                                                                                                                                                                                                                                                                                                                                                                                                                                                                                                                                                                                                                                                                              |
| regulation of gonadotropin secretion                                               | GO:0032276 | 1.97E-01 | 2.92E-01 | Inhba,16323:down                                                                                                                                                                                                                                                                                                                                                                                                                                                                                                                                                                                                                                                                                                                                                                                                                                                                                                                                                                                                                                                                                                                                                                                                                                                                                                                                                                                                                                                                                                                                                                                                                                                                                                                                                                                                                                                                                                               |
| bronchus development                                                               | GO:0060433 | 1.97E-01 | 2.92E-01 | Bmp4,12159:up                                                                                                                                                                                                                                                                                                                                                                                                                                                                                                                                                                                                                                                                                                                                                                                                                                                                                                                                                                                                                                                                                                                                                                                                                                                                                                                                                                                                                                                                                                                                                                                                                                                                                                                                                                                                                                                                                                                  |
| anagen                                                                             | GO:0042640 | 1.97E-01 | 2.92E-01 | Ptgs2,19225:down                                                                                                                                                                                                                                                                                                                                                                                                                                                                                                                                                                                                                                                                                                                                                                                                                                                                                                                                                                                                                                                                                                                                                                                                                                                                                                                                                                                                                                                                                                                                                                                                                                                                                                                                                                                                                                                                                                               |
| AMP metabolic process                                                              | GO:0046033 | 1.97E-01 | 2.92E-01 | Ampd3,11717:up                                                                                                                                                                                                                                                                                                                                                                                                                                                                                                                                                                                                                                                                                                                                                                                                                                                                                                                                                                                                                                                                                                                                                                                                                                                                                                                                                                                                                                                                                                                                                                                                                                                                                                                                                                                                                                                                                                                 |
| mast cell migration                                                                | GO:0097531 | 1.97E-01 | 2.92E-01 | Figf,14205:up                                                                                                                                                                                                                                                                                                                                                                                                                                                                                                                                                                                                                                                                                                                                                                                                                                                                                                                                                                                                                                                                                                                                                                                                                                                                                                                                                                                                                                                                                                                                                                                                                                                                                                                                                                                                                                                                                                                  |
| regulation of transcription from RNA polymerase II promoter in response to hypoxia | GO:0061418 | 1.97E-01 | 2.92E-01 | Vegfa,22339:down                                                                                                                                                                                                                                                                                                                                                                                                                                                                                                                                                                                                                                                                                                                                                                                                                                                                                                                                                                                                                                                                                                                                                                                                                                                                                                                                                                                                                                                                                                                                                                                                                                                                                                                                                                                                                                                                                                               |
| cellular response to fluid shear stress                                            | GO:0071498 | 1.97E-01 | 2.92E-01 | Ptgs2,19225:down                                                                                                                                                                                                                                                                                                                                                                                                                                                                                                                                                                                                                                                                                                                                                                                                                                                                                                                                                                                                                                                                                                                                                                                                                                                                                                                                                                                                                                                                                                                                                                                                                                                                                                                                                                                                                                                                                                               |
| lateral ventricle development                                                      | GO:0021670 | 1.97E-01 | 2.92E-01 | Uchl5,56207:up                                                                                                                                                                                                                                                                                                                                                                                                                                                                                                                                                                                                                                                                                                                                                                                                                                                                                                                                                                                                                                                                                                                                                                                                                                                                                                                                                                                                                                                                                                                                                                                                                                                                                                                                                                                                                                                                                                                 |
| CD4-positive, alpha-beta T cell lineage commitment                                 | GO:0043373 | 1.97E-01 | 2.92E-01 | Ly9,17085:up                                                                                                                                                                                                                                                                                                                                                                                                                                                                                                                                                                                                                                                                                                                                                                                                                                                                                                                                                                                                                                                                                                                                                                                                                                                                                                                                                                                                                                                                                                                                                                                                                                                                                                                                                                                                                                                                                                                   |
| semaphorin-plexin signaling pathway involved in axon guidance                      | GO:1902287 | 1.97E-01 | 2.92E-01 | Plxnd1,67784:up                                                                                                                                                                                                                                                                                                                                                                                                                                                                                                                                                                                                                                                                                                                                                                                                                                                                                                                                                                                                                                                                                                                                                                                                                                                                                                                                                                                                                                                                                                                                                                                                                                                                                                                                                                                                                                                                                                                |
| response to hepatocyte growth factor                                               | GO:0035728 | 1.97E-01 | 2.92E-01 | Adamts12,239337:down                                                                                                                                                                                                                                                                                                                                                                                                                                                                                                                                                                                                                                                                                                                                                                                                                                                                                                                                                                                                                                                                                                                                                                                                                                                                                                                                                                                                                                                                                                                                                                                                                                                                                                                                                                                                                                                                                                           |
| otic vesicle development                                                           | GO:0071599 | 1.97E-01 | 2.92E-01 | Fgfr2,14183:up                                                                                                                                                                                                                                                                                                                                                                                                                                                                                                                                                                                                                                                                                                                                                                                                                                                                                                                                                                                                                                                                                                                                                                                                                                                                                                                                                                                                                                                                                                                                                                                                                                                                                                                                                                                                                                                                                                                 |
| regulation of cell cycle                                                           | GO:0051726 | 1.97E-01 | 2.93E-01 | Hpgd,15446:up Inhba,16323:down Nabp1,109019:down Igf1,16002:up Tnf,21926:up Plk2,20620:down Egfr,13649:down Fgfr1,14182:down Sfrp1,20377:up Susd2,71733:up Wnt5a,22418:down Ptgs2,19225:down Bmp4,12159:up Igf1,16000:up Tgfb2,21808:down Fgfr2,14183:up                                                                                                                                                                                                                                                                                                                                                                                                                                                                                                                                                                                                                                                                                                                                                                                                                                                                                                                                                                                                                                                                                                                                                                                                                                                                                                                                                                                                                                                                                                                                                                                                                                                                       |
| cellular macromolecule metabolic process                                           | GO:0044260 | 1.99E-01 | 2.95E-01 | Fstl3,83554:down Igf1,16010:up Adm,11535:up Flrt2,399558:down Tfec,21426:up Sfrp4,20379:up C3,12266:up Ankrd1,107765:down Lyl1,17095:up Gstt1,14871:up Igf1,16000:up Cd109,235505:down Loxl2,94352:down Plk2,20620:down Loxl3,16950:down Trf,22041:up Cd24a,12484:down Fkbp14,231997:down Wnt5a,22418:down Mark1,226778:up Il1rn,16181:up Igf1,16000:up Adipoq,11450:up Bmp4,12159:up Tgfb2,21808:down Hpsa,15442:up F3,14066:up Fgfr2,14183:up Htr2b,15559:down Kng1,16644:up Pr12c2,18811:up Efemp1,216616:up Ccl6,20305:up Slpi,20568:up Aspn,66695:down Saa3,20210:up Vdr,22337:down Pdia5,72599:down Fabp4,11770:up Nabp1,109019:down Htr2a,15558:down Oas3,246727:up Slc40a1,53945:up Gas6,14456:up Egfr,13649:down Col11a1,12814:down Sfrp1,20377:up C1qtnf3,81799:down Tgfb2,21808:down Tfrc,22042:up Ceacam1,26365:up Ccl8,20307:up Sfrp2,20319:up Serpina3g,20715:up Fam20a,208659:down Npnt,114249:up Tnfrsf11b,18383:up Prkar2b,19088:up S100a1,20193:up Ice1,218333:down Ednrb,13618:up Mmp13,17386:up Sema7a,20361:down Epas1,13819:up Htra3,78558:down Uchl5,56207:up Ddah1,69219:down Sdpr,20324:down Fkbp10,14230:down Man2a2,140481:up Dok2,13449:up Mamdc2,71738:down Ptx3,19288:up Bmpr1a,12166:down Ccl12,20293:up Ccl4,20303:up Chst11,58250:down Ret,19713:up Vegfb,22340:up Sdf2l1,64136:up Ppp3,67916:up Creb3l1,26427:down Kitl,17311:up P4ha1,18451:down Ccl9,20308:up Inhba,16323:down Aoah,27052:up Rasl11a,68895:up Bnc2,242509:down Plat,18791:down Ccl3,20302:up Tfpi2,21789:down Ctla2a,13024:down Crif1,12931:down Vegfa,22339:down Serpine2,20720:up Adamts12,239337:down Lrrc15,74488:down Nxn,18230:down Igf1,16002:up Pparg,19016:up Tnf,21926:up Glp1r,14652:down Lmcd1,30937:up Fgfr1,14182:down Has2,15117:down Hmox1,15368:up Sulf1,240725:down Cd4,12504:up Grem1,23892:up Col3a1,12825:down Phf11d,219132:up Tbx15,21384:down Serping1,12258:up Errfi1,74155:down Enpp1,18605:down |
| regulation of systemic arterial blood pressure                                     | GO:0003073 | 1.99E-01 | 2.95E-01 | Gas6,14456:up Ddah1,69219:down Postn,50706:down                                                                                                                                                                                                                                                                                                                                                                                                                                                                                                                                                                                                                                                                                                                                                                                                                                                                                                                                                                                                                                                                                                                                                                                                                                                                                                                                                                                                                                                                                                                                                                                                                                                                                                                                                                                                                                                                                |
| intracellular protein transport                                                    | GO:0006886 | 2.00E-01 | 2.97E-01 | Ice1,218333:down Ccl2,20296:up Gas6,14456:up Tnf,21926:up Akr1c18,105349:up Cd24a,12484:down Egfr,13649:down Sec23a,20334:down C1qtnf3,81799:down Bmpr1a,12166:down Ptgs2,19225:down Grem1,23892:up Adipoq,11450:up Bmp4,12159:up Igf1,16000:up Ceacam1,26365:up Sfrp2,20319:up Tgfb2,21808:down                                                                                                                                                                                                                                                                                                                                                                                                                                                                                                                                                                                                                                                                                                                                                                                                                                                                                                                                                                                                                                                                                                                                                                                                                                                                                                                                                                                                                                                                                                                                                                                                                               |
| response to glucose                                                                | GO:0009749 | 2.02E-01 | 2.99E-01 | Gas6,14456:up Glp1r,14652:down Igf1,16000:up Adipoq,11450:up                                                                                                                                                                                                                                                                                                                                                                                                                                                                                                                                                                                                                                                                                                                                                                                                                                                                                                                                                                                                                                                                                                                                                                                                                                                                                                                                                                                                                                                                                                                                                                                                                                                                                                                                                                                                                                                                   |
| phosphatidylinositol biosynthetic process                                          | GO:0006661 | 2.02E-01 | 2.99E-01 | Htr2b,15559:down Htr2a,15558:down                                                                                                                                                                                                                                                                                                                                                                                                                                                                                                                                                                                                                                                                                                                                                                                                                                                                                                                                                                                                                                                                                                                                                                                                                                                                                                                                                                                                                                                                                                                                                                                                                                                                                                                                                                                                                                                                                              |

|                                                                          |            |          |          |                                                                                                                                         |
|--------------------------------------------------------------------------|------------|----------|----------|-----------------------------------------------------------------------------------------------------------------------------------------|
| developmental pigmentation                                               | GO:0048066 | 2.02E-01 | 2.99E-01 | Ednrb,13618:up Kitl,17311:up                                                                                                            |
| secondary metabolic process                                              | GO:0019748 | 2.02E-01 | 2.99E-01 | Akr1c18,105349:up Wnt5a,22418:down                                                                                                      |
| positive regulation of tyrosine phosphorylation of STAT protein          | GO:0042531 | 2.02E-01 | 2.99E-01 | Crfl1,12931:down Igf1,16000:up                                                                                                          |
| regulation of cellular component size                                    | GO:0032535 | 2.07E-01 | 3.07E-01 | Plxnd1,67784:up Wnt5a,22418:down Sema7a,20361:down Tnfrsf12a,27279:down Crabp2,12904:down Ret,19713:up Cxcl12,20315:up Vegfa,22339:down |
| carboxylic acid catabolic process                                        | GO:0046395 | 2.07E-01 | 3.07E-01 | Ddah1,69219:down Npl,74091:up Hal,15109:up Cdo1,12583:up Adipoq,11450:up                                                                |
| organic acid catabolic process                                           | GO:0016054 | 2.07E-01 | 3.07E-01 | Ddah1,69219:down Npl,74091:up Hal,15109:up Cdo1,12583:up Adipoq,11450:up                                                                |
| import into cell                                                         | GO:0098657 | 2.09E-01 | 3.09E-01 | Trf,22041:up Gpm6b,14758:up                                                                                                             |
| morphogenesis of an epithelial sheet                                     | GO:0002011 | 2.09E-01 | 3.09E-01 | Col5a1,12831:down Wnt5a,22418:down                                                                                                      |
| mating                                                                   | GO:0007618 | 2.09E-01 | 3.09E-01 | Serpine2,20720:up Ednrb,13618:up                                                                                                        |
| regulation of vasodilation                                               | GO:0042312 | 2.09E-01 | 3.09E-01 | Adm,11535:up Egfr,13649:down                                                                                                            |
| striated muscle cell development                                         | GO:0055002 | 2.09E-01 | 3.09E-01 | Vegfa,22339:down Wisp1,22402:down Igf1,16000:up Bmp4,12159:up                                                                           |
| pyrimidine ribonucleotide biosynthetic process                           | GO:0009220 | 2.11E-01 | 3.09E-01 | Uck2,80914:down                                                                                                                         |
| pyrimidine ribonucleoside biosynthetic process                           | GO:0046132 | 2.11E-01 | 3.09E-01 | Uck2,80914:down                                                                                                                         |
| microvillus assembly                                                     | GO:0030033 | 2.11E-01 | 3.09E-01 | Prl2c2,18811:up                                                                                                                         |
| positive regulation of transforming growth factor beta production        | GO:0071636 | 2.11E-01 | 3.09E-01 | Ptgs2,19225:down                                                                                                                        |
| serotonin secretion                                                      | GO:0001820 | 2.11E-01 | 3.09E-01 | Maob,109731:up                                                                                                                          |
| regulation of ketone biosynthetic process                                | GO:0010566 | 2.11E-01 | 3.09E-01 | Akr1c18,105349:up                                                                                                                       |
| interleukin-8 biosynthetic process                                       | GO:0042228 | 2.11E-01 | 3.09E-01 | Tnf,21926:up                                                                                                                            |
| negative regulation of epidermal cell differentiation                    | GO:0045605 | 2.11E-01 | 3.09E-01 | Tgfb2,21808:down                                                                                                                        |
| regulation of cerebellar granule cell precursor proliferation            | GO:0021936 | 2.11E-01 | 3.09E-01 | Igf1,16000:up                                                                                                                           |
| nonribosomal peptide biosynthetic process                                | GO:0019184 | 2.11E-01 | 3.09E-01 | Ggt5,23887:up                                                                                                                           |
| positive regulation of cholesterol efflux                                | GO:0010875 | 2.11E-01 | 3.09E-01 | Adipoq,11450:up                                                                                                                         |
| magnesium ion homeostasis                                                | GO:0010960 | 2.11E-01 | 3.09E-01 | Egfr,13649:down                                                                                                                         |
| positive regulation of posttranscriptional gene silencing                | GO:0060148 | 2.11E-01 | 3.09E-01 | Egfr,13649:down                                                                                                                         |
| positive regulation of cardiac muscle cell apoptotic process             | GO:0010666 | 2.11E-01 | 3.09E-01 | Igfbp3,16009:up                                                                                                                         |
| embryonic skeletal joint morphogenesis                                   | GO:0060272 | 2.11E-01 | 3.09E-01 | Bmp4,12159:up                                                                                                                           |
| protein deglycosylation                                                  | GO:0006517 | 2.11E-01 | 3.09E-01 | Man2a2,140481:up                                                                                                                        |
| response to cholesterol                                                  | GO:0070723 | 2.11E-01 | 3.09E-01 | Inhba,16323:down                                                                                                                        |
| detection of temperature stimulus involved in sensory perception of pain | GO:0050965 | 2.11E-01 | 3.09E-01 | Htr2a,15558:down                                                                                                                        |
| immature T cell proliferation                                            | GO:0033079 | 2.11E-01 | 3.09E-01 | Bmp4,12159:up                                                                                                                           |
| nucleoside transport                                                     | GO:0015858 | 2.11E-01 | 3.09E-01 | Slc29a1,63959:up                                                                                                                        |
| cellular defense response                                                | GO:0006968 | 2.11E-01 | 3.09E-01 | Clec2d,93694:up                                                                                                                         |
| response to platelet-derived growth factor                               | GO:0036119 | 2.11E-01 | 3.09E-01 | Has2,15117:down                                                                                                                         |
| positive regulation of macrophage chemotaxis                             | GO:0010759 | 2.11E-01 | 3.09E-01 | Ccl2,20296:up                                                                                                                           |

|                                                                              |            |          |          |                                                                                                                   |
|------------------------------------------------------------------------------|------------|----------|----------|-------------------------------------------------------------------------------------------------------------------|
| positive regulation of tyrosine phosphorylation of Stat5 protein             | GO:0042523 | 2.11E-01 | 3.09E-01 | Igf1,16000:up                                                                                                     |
| hyaluronan biosynthetic process                                              | GO:0030213 | 2.11E-01 | 3.09E-01 | Has2,15117:down                                                                                                   |
| response to lipoprotein particle                                             | GO:0055094 | 2.11E-01 | 3.09E-01 | Pparg,19016:up                                                                                                    |
| semaphorin-plexin signaling pathway involved in neuron projection guidance   | GO:1902285 | 2.11E-01 | 3.09E-01 | Plxnd1,67784:up                                                                                                   |
| positive regulation of insulin receptor signaling pathway                    | GO:0046628 | 2.11E-01 | 3.09E-01 | Igf2,16002:up                                                                                                     |
| regulation of acute inflammatory response to antigenic stimulus              | GO:0002864 | 2.11E-01 | 3.09E-01 | C3,12266:up                                                                                                       |
| positive regulation of peptidyl-serine phosphorylation of STAT protein       | GO:0033141 | 2.11E-01 | 3.09E-01 | Ret,19713:up                                                                                                      |
| regulation of timing of cell differentiation                                 | GO:0048505 | 2.11E-01 | 3.09E-01 | Serpine2,20720:up                                                                                                 |
| positive regulation of sequestering of calcium ion                           | GO:0051284 | 2.11E-01 | 3.09E-01 | Tgfb2,21808:down                                                                                                  |
| renal absorption                                                             | GO:0070293 | 2.11E-01 | 3.09E-01 | Adipoq,11450:up                                                                                                   |
| I-kappaB phosphorylation                                                     | GO:0007252 | 2.11E-01 | 3.09E-01 | Saa3,20210:up                                                                                                     |
| cellular response to exogenous dsRNA                                         | GO:0071360 | 2.11E-01 | 3.09E-01 | Ifit1,15957:up                                                                                                    |
| cerebellar granular layer development                                        | GO:0021681 | 2.11E-01 | 3.09E-01 | Serpine2,20720:up                                                                                                 |
| regulation of epithelial cell differentiation involved in kidney development | GO:2000696 | 2.11E-01 | 3.09E-01 | Adipoq,11450:up                                                                                                   |
| thalamus development                                                         | GO:0021794 | 2.11E-01 | 3.09E-01 | Ncam1,17967:down                                                                                                  |
| polyol catabolic process                                                     | GO:0046174 | 2.11E-01 | 3.09E-01 | Sord,20322:up                                                                                                     |
| lung secretory cell differentiation                                          | GO:0061140 | 2.11E-01 | 3.09E-01 | Igf1,16000:up                                                                                                     |
| positive regulation of striated muscle cell apoptotic process                | GO:0010663 | 2.11E-01 | 3.09E-01 | Igfbp3,16009:up                                                                                                   |
| detection of temperature stimulus involved in sensory perception             | GO:0050961 | 2.11E-01 | 3.09E-01 | Htr2a,15558:down                                                                                                  |
| positive regulation of action potential                                      | GO:0045760 | 2.11E-01 | 3.09E-01 | Tnf,21926:up                                                                                                      |
| eosinophil migration                                                         | GO:0072677 | 2.11E-01 | 3.09E-01 | Ccl2,20296:up                                                                                                     |
| apoptotic DNA fragmentation                                                  | GO:0006309 | 2.11E-01 | 3.09E-01 | Igfbp3,16009:up                                                                                                   |
| cellular amino acid metabolic process                                        | GO:0006520 | 2.13E-01 | 3.11E-01 | P4ha1,18451:down Ddah1,69219:down Gatm,67092:down Gfpt2,14584:down Serinc2,230779:down Hal,15109:up Cdo1,12583:up |
| alcohol biosynthetic process                                                 | GO:0046165 | 2.13E-01 | 3.11E-01 | Vdr,22337:down Tnf,21926:up Akr1c18,105349:up Fabp5,16592:up                                                      |
| response to hexose                                                           | GO:0009746 | 2.13E-01 | 3.11E-01 | Gas6,14456:up Glp1r,14652:down Igf1,16000:up Adipoq,11450:up                                                      |
| immunoglobulin production                                                    | GO:0002377 | 2.13E-01 | 3.11E-01 | Ceacam1,26365:up Tnf,21926:up Tfrc,22042:up                                                                       |
| positive regulation of autophagy                                             | GO:0010508 | 2.14E-01 | 3.12E-01 | Plk2,20620:down Lmcd1,30937:up Plod2,26432:down Hmox1,15368:up Sfrp4,20379:up                                     |
| inorganic anion transmembrane transport                                      | GO:0098661 | 2.15E-01 | 3.14E-01 | Ank,11732:down Fxyd1,56188:up                                                                                     |
| adenylate cyclase-modulating G-protein coupled receptor signaling pathway    | GO:0007188 | 2.17E-01 | 3.16E-01 | Htr2b,15559:down Glp1r,14652:down Htr2a,15558:down Ptgir,19222:up                                                 |
| response to monosaccharide                                                   | GO:0034284 | 2.17E-01 | 3.16E-01 | Gas6,14456:up Glp1r,14652:down Igf1,16000:up Adipoq,11450:up                                                      |
| pallium development                                                          | GO:0021543 | 2.17E-01 | 3.16E-01 | Fgfr1,14182:down Egfr,13649:down Cx3cr1,13051:down Col3a1,12825:down                                              |

|                                                                          |            |          |          |                                                                                                                                                                                                                                                                                                                                                                                                                                                                                                                                                                                                                                                                                                                                                                                                                                                                                                                                                                                                                                                                                                                                                                                                                                                                                                                                                                                                                                                                |
|--------------------------------------------------------------------------|------------|----------|----------|----------------------------------------------------------------------------------------------------------------------------------------------------------------------------------------------------------------------------------------------------------------------------------------------------------------------------------------------------------------------------------------------------------------------------------------------------------------------------------------------------------------------------------------------------------------------------------------------------------------------------------------------------------------------------------------------------------------------------------------------------------------------------------------------------------------------------------------------------------------------------------------------------------------------------------------------------------------------------------------------------------------------------------------------------------------------------------------------------------------------------------------------------------------------------------------------------------------------------------------------------------------------------------------------------------------------------------------------------------------------------------------------------------------------------------------------------------------|
| endothelial cell development                                             | GO:001885  | 2.22E-01 | 3.23E-01 | Tnf,21926:up Stc1,20855:up                                                                                                                                                                                                                                                                                                                                                                                                                                                                                                                                                                                                                                                                                                                                                                                                                                                                                                                                                                                                                                                                                                                                                                                                                                                                                                                                                                                                                                     |
| L-amino acid transport                                                   | GO:0015807 | 2.22E-01 | 3.23E-01 | Tnf,21926:up Serinc2,230779:down                                                                                                                                                                                                                                                                                                                                                                                                                                                                                                                                                                                                                                                                                                                                                                                                                                                                                                                                                                                                                                                                                                                                                                                                                                                                                                                                                                                                                               |
| organic acid transmembrane transport                                     | GO:1903825 | 2.22E-01 | 3.23E-01 | Emb,13723:up Slc16a4,229699:down                                                                                                                                                                                                                                                                                                                                                                                                                                                                                                                                                                                                                                                                                                                                                                                                                                                                                                                                                                                                                                                                                                                                                                                                                                                                                                                                                                                                                               |
| regulation of nucleobase-containing compound metabolic process           | GO:0019219 | 2.22E-01 | 3.23E-01 | Fstl3,83554:down Ice1,218333:down Adm,11535:up Tfec,21426:up Sfrp4,20379:up Pdgfc,54635:down Ednrb,13618:up Epas1,13819:up Ankrd1,107765:down Htra3,78558:down Uchl5,56207:up Lyl1,17095:up Sdpr,20324:down Igf1,16000:up Lmx1,21926:down Lmx2,21926:down Lmx3,16950:down Trf,22041:up Wnt5a,22418:down Bmpr1a,12166:down Ccl4,20303:up Adipoq,11450:up Bmp4,12159:up Igf1,16000:up Ret,19713:up Ppp3,67916:up Ptgir,19222:up Creb3l1,26427:down Fgfr2,14183:up Kitl,17311:up Prl2c2,18811:up Efemp1,216616:up Inhba,16323:down Ras11a,68895:up Bnc2,242509:down Ccl3,20302:up Vdr,22337:down Fabp4,11770:up Vegfa,22339:down Htra2a,15558:down Oas3,246727:up Igf2,16002:up Slc40a1,53945:up Pparg,19016:up Gas6,14456:up Tnf,21926:up Glp1r,14652:down Lmcd1,30937:up Fgfr1,14182:down Egfr,13649:down Hmx1,15368:up Sfrp1,20377:up Sulf1,240725:down Tgfb3,21814:up Tfrc,22042:up Grem1,23892:up Phf11d,219132:up Sfrp2,20319:up Tbx15,21384:down Npnt,114249:up S100a1,20193:up                                                                                                                                                                                                                                                                                                                                                                                                                                                                            |
| nucleoside diphosphate metabolic process                                 | GO:0009132 | 2.22E-01 | 3.24E-01 | Htra2a,15558:down Ampd3,11717:up Igf1,16000:up                                                                                                                                                                                                                                                                                                                                                                                                                                                                                                                                                                                                                                                                                                                                                                                                                                                                                                                                                                                                                                                                                                                                                                                                                                                                                                                                                                                                                 |
| negative regulation of cytoplasmic transport                             | GO:1903650 | 2.22E-01 | 3.24E-01 | Gas6,14456:up C1qtnf3,81799:down Tgfb2,21808:down                                                                                                                                                                                                                                                                                                                                                                                                                                                                                                                                                                                                                                                                                                                                                                                                                                                                                                                                                                                                                                                                                                                                                                                                                                                                                                                                                                                                              |
| cardiac muscle contraction                                               | GO:0060048 | 2.22E-01 | 3.24E-01 | Fxyd1,56188:up Vegfb,22340:up Stc1,20855:up                                                                                                                                                                                                                                                                                                                                                                                                                                                                                                                                                                                                                                                                                                                                                                                                                                                                                                                                                                                                                                                                                                                                                                                                                                                                                                                                                                                                                    |
| single-organism carbohydrate catabolic process                           | GO:0044724 | 2.22E-01 | 3.24E-01 | Sord,20322:up Htra2a,15558:down Igf1,16000:up                                                                                                                                                                                                                                                                                                                                                                                                                                                                                                                                                                                                                                                                                                                                                                                                                                                                                                                                                                                                                                                                                                                                                                                                                                                                                                                                                                                                                  |
| regulation of macromolecule biosynthetic process                         | GO:0010556 | 2.23E-01 | 3.24E-01 | Fstl3,83554:down Ice1,218333:down Tfec,21426:up Sfrp4,20379:up Ccl2,20296:up Pdgfc,54635:down Ednrb,13618:up Epas1,13819:up Ankrd1,107765:down Htra3,78558:down Uchl5,56207:up Lyl1,17095:up Sdpr,20324:down Lmx2,21926:down Lmx3,16950:down Trf,22041:up Wnt5a,22418:down Bmpr1a,12166:down Ccl4,20303:up Adipoq,11450:up Bmp4,12159:up Igf1,16000:up Ret,19713:up Prg4,96875:down Tgfb2,21808:down Ppp3,67916:up Creb3l1,26427:down Fgfr2,14183:up Kitl,17311:up Prl2c2,18811:up Efemp1,216616:up Inhba,16323:down Ras11a,68895:up Bnc2,242509:down Ccl3,20302:up Vdr,22337:down Fabp4,11770:up Vegfa,22339:down Igf2,16002:up Slc40a1,53945:up Pparg,19016:up Gas6,14456:up Tnf,21926:up Glp1r,14652:down Lmcd1,30937:up Fgfr1,14182:down Egfr,13649:down Has2,15117:down Hmx1,15368:up Sfrp1,20377:up Sulf1,240725:down Tgfb3,21814:up Grem1,23892:up Phf11d,219132:up Sfrp2,20319:up Tbx15,21384:down Npnt,114249:up Errf1,74155:down Enpp1,18605:down S100a1,20193:up                                                                                                                                                                                                                                                                                                                                                                                                                                                                                    |
| regulation of muscle contraction                                         | GO:0006937 | 2.24E-01 | 3.25E-01 | Fxyd1,56188:up Ptgs2,19225:down Npnt,114249:up Stc1,20855:up                                                                                                                                                                                                                                                                                                                                                                                                                                                                                                                                                                                                                                                                                                                                                                                                                                                                                                                                                                                                                                                                                                                                                                                                                                                                                                                                                                                                   |
| biosynthetic process                                                     | GO:0009058 | 2.25E-01 | 3.25E-01 | Fstl3,83554:down Adm,11535:up Tfec,21426:up Sfrp4,20379:up C3,12266:up Ankrd1,107765:down Serpinh1,12406:down Lyl1,17095:up Ggt5,23887:up Lmx2,21926:down Lmx3,16950:down Trf,22041:up Wnt5a,22418:down Adipoq,11450:up Bmp4,12159:up Igf1,16000:up Tgfb2,21808:down Ptgir,19222:up Fgfr2,14183:up Htra2b,15559:down Prl2c2,18811:up Efemp1,216616:up Vdr,22337:down Fabp4,11770:up Htra2a,15558:down Slc40a1,53945:up Gas6,14456:up Egfr,13649:down Sfrp1,20377:up C1qtnf3,81799:down Tgfb3,21814:up Ceacam1,26365:up Sfrp2,20319:up Npnt,114249:up S100a1,20193:up Ice1,218333:down Aldh1a2,19378:up Ccl2,20296:up Pdgfc,54635:down Ednrb,13618:up Ampd3,11717:up Epas1,13819:up Htra3,78558:down Sord,20322:up Uchl5,56207:up Ddah1,69219:down Sdpr,20324:down Cdo1,12583:up Man2a2,140481:up Ptx3,19288:up Akr1c18,105349:up Fabp5,16592:up Bmpr1a,12166:down Ccl4,20303:up Chst11,58250:down Gatm,67092:down Ret,19713:up Prg4,96875:down Vegfb,22340:up Sdf2l1,64136:up Pdxk,216134:up Aldh1a3,56847:down Ppp3,67916:up Creb3l1,26427:down Kitl,17311:up Ras11a,68895:up Inhba,16323:down Bnc2,242509:down Ccl3,20302:up Vegfa,22339:down Gfpt2,14584:down Igf2,16002:up Pparg,19016:up Tnf,21926:up Lmcd1,30937:up Glp1r,14652:down Fgfr1,14182:down Hmx1,15368:up Lpl,16956:up Has2,15117:down Sulf1,240725:down Ptgs2,19225:down Grem1,23892:up Phf11d,219132:up Tbx15,21384:down Col5a1,12831:down Uck2,80914:down Errf1,74155:down Enpp1,18605:down |
| detection of mechanical stimulus involved in sensory perception of sound | GO:0050910 | 2.25E-01 | 3.25E-01 | Col11a1,12814:down                                                                                                                                                                                                                                                                                                                                                                                                                                                                                                                                                                                                                                                                                                                                                                                                                                                                                                                                                                                                                                                                                                                                                                                                                                                                                                                                                                                                                                             |
| kidney mesenchyme development                                            | GO:0072074 | 2.25E-01 | 3.25E-01 | Bmp4,12159:up                                                                                                                                                                                                                                                                                                                                                                                                                                                                                                                                                                                                                                                                                                                                                                                                                                                                                                                                                                                                                                                                                                                                                                                                                                                                                                                                                                                                                                                  |
| positive regulation of nitric-oxide synthase biosynthetic process        | GO:0051770 | 2.25E-01 | 3.25E-01 | Ccl2,20296:up                                                                                                                                                                                                                                                                                                                                                                                                                                                                                                                                                                                                                                                                                                                                                                                                                                                                                                                                                                                                                                                                                                                                                                                                                                                                                                                                                                                                                                                  |
| cell differentiation involved in metanephros development                 | GO:0072202 | 2.25E-01 | 3.25E-01 | Adipoq,11450:up                                                                                                                                                                                                                                                                                                                                                                                                                                                                                                                                                                                                                                                                                                                                                                                                                                                                                                                                                                                                                                                                                                                                                                                                                                                                                                                                                                                                                                                |
| regulation of microvillus organization                                   | GO:0032530 | 2.25E-01 | 3.25E-01 | Prl2c2,18811:up                                                                                                                                                                                                                                                                                                                                                                                                                                                                                                                                                                                                                                                                                                                                                                                                                                                                                                                                                                                                                                                                                                                                                                                                                                                                                                                                                                                                                                                |
| renal system process involved in regulation of blood volume              | GO:0001977 | 2.25E-01 | 3.25E-01 | Gas6,14456:up                                                                                                                                                                                                                                                                                                                                                                                                                                                                                                                                                                                                                                                                                                                                                                                                                                                                                                                                                                                                                                                                                                                                                                                                                                                                                                                                                                                                                                                  |
| regulation of anion transmembrane transport                              | GO:1903959 | 2.25E-01 | 3.25E-01 | Fxyd1,56188:up                                                                                                                                                                                                                                                                                                                                                                                                                                                                                                                                                                                                                                                                                                                                                                                                                                                                                                                                                                                                                                                                                                                                                                                                                                                                                                                                                                                                                                                 |
| decidualization                                                          | GO:0046697 | 2.25E-01 | 3.25E-01 | Ptgs2,19225:down                                                                                                                                                                                                                                                                                                                                                                                                                                                                                                                                                                                                                                                                                                                                                                                                                                                                                                                                                                                                                                                                                                                                                                                                                                                                                                                                                                                                                                               |
| sulfur amino acid biosynthetic process                                   | GO:0000097 | 2.25E-01 | 3.25E-01 | Cdo1,12583:up                                                                                                                                                                                                                                                                                                                                                                                                                                                                                                                                                                                                                                                                                                                                                                                                                                                                                                                                                                                                                                                                                                                                                                                                                                                                                                                                                                                                                                                  |
| glomerular mesangium development                                         | GO:0072109 | 2.25E-01 | 3.25E-01 | Bmp4,12159:up                                                                                                                                                                                                                                                                                                                                                                                                                                                                                                                                                                                                                                                                                                                                                                                                                                                                                                                                                                                                                                                                                                                                                                                                                                                                                                                                                                                                                                                  |



|                                                                    |            |          |          |                                                                                                                                                                                                                                                                                                |
|--------------------------------------------------------------------|------------|----------|----------|------------------------------------------------------------------------------------------------------------------------------------------------------------------------------------------------------------------------------------------------------------------------------------------------|
| negative regulation of calcium ion transport into cytosol          | GO:0010523 | 2.25E-01 | 3.25E-01 | Tgfb2,21808:down                                                                                                                                                                                                                                                                               |
| lipoprotein localization                                           | GO:0044872 | 2.25E-01 | 3.25E-01 | Pparg,19016:up                                                                                                                                                                                                                                                                                 |
| regulation of development, heterochronic                           | GO:0040034 | 2.25E-01 | 3.25E-01 | Serpine2,20720:up                                                                                                                                                                                                                                                                              |
| regulation of cell proliferation involved in kidney development    | GO:1901722 | 2.25E-01 | 3.25E-01 | Bmp4,12159:up                                                                                                                                                                                                                                                                                  |
| cardiac conduction system development                              | GO:0003161 | 2.25E-01 | 3.25E-01 | Bmpr1a,12166:down                                                                                                                                                                                                                                                                              |
| lipoprotein transport                                              | GO:0042953 | 2.25E-01 | 3.25E-01 | Pparg,19016:up                                                                                                                                                                                                                                                                                 |
| penile erection                                                    | GO:0043084 | 2.25E-01 | 3.25E-01 | Ednrb,13618:up                                                                                                                                                                                                                                                                                 |
| alpha-beta T cell lineage commitment                               | GO:0002363 | 2.25E-01 | 3.25E-01 | Ly9,17085:up                                                                                                                                                                                                                                                                                   |
| positive regulation of fibroblast migration                        | GO:0010763 | 2.25E-01 | 3.25E-01 | Fgfr1,14182:down                                                                                                                                                                                                                                                                               |
| regulation of phagocytosis, engulfment                             | GO:0060099 | 2.25E-01 | 3.25E-01 | Pparg,19016:up                                                                                                                                                                                                                                                                                 |
| leukotriene metabolic process                                      | GO:0006691 | 2.25E-01 | 3.25E-01 | Ggt5,23887:up                                                                                                                                                                                                                                                                                  |
| negative regulation of lipid storage                               | GO:0010888 | 2.25E-01 | 3.25E-01 | Pparg,19016:up                                                                                                                                                                                                                                                                                 |
| pyrimidine ribonucleotide metabolic process                        | GO:0009218 | 2.25E-01 | 3.25E-01 | Uck2,80914:down                                                                                                                                                                                                                                                                                |
| T-helper 17 cell differentiation                                   | GO:0072539 | 2.25E-01 | 3.25E-01 | Ly9,17085:up                                                                                                                                                                                                                                                                                   |
| positive regulation of nitric-oxide synthase activity              | GO:0051000 | 2.25E-01 | 3.25E-01 | Htr2b,15559:down                                                                                                                                                                                                                                                                               |
| GABAergic neuron differentiation                                   | GO:0097154 | 2.25E-01 | 3.25E-01 | Inhba,16323:down                                                                                                                                                                                                                                                                               |
| regulation of peptidyl-serine phosphorylation of STAT protein      | GO:0033139 | 2.25E-01 | 3.25E-01 | Ret,19713:up                                                                                                                                                                                                                                                                                   |
| cell wall macromolecule metabolic process                          | GO:0044036 | 2.25E-01 | 3.25E-01 | Sdf2l1,64136:up                                                                                                                                                                                                                                                                                |
| positive regulation of execution phase of apoptosis                | GO:1900119 | 2.25E-01 | 3.25E-01 | Igfbp3,16009:up                                                                                                                                                                                                                                                                                |
| myoblast proliferation                                             | GO:0051450 | 2.25E-01 | 3.25E-01 | Igf1,16000:up                                                                                                                                                                                                                                                                                  |
| nose development                                                   | GO:0043584 | 2.25E-01 | 3.25E-01 | Aldh1a3,56847:down                                                                                                                                                                                                                                                                             |
| T cell chemotaxis                                                  | GO:0010818 | 2.25E-01 | 3.25E-01 | Wnt5a,22418:down                                                                                                                                                                                                                                                                               |
| positive regulation of protein import into nucleus, translocation  | GO:0033160 | 2.25E-01 | 3.25E-01 | Igf1,16000:up                                                                                                                                                                                                                                                                                  |
| positive regulation of transcription regulatory region DNA binding | GO:2000679 | 2.25E-01 | 3.25E-01 | Igf1,16000:up                                                                                                                                                                                                                                                                                  |
| negative regulation of oligodendrocyte differentiation             | GO:0048715 | 2.25E-01 | 3.25E-01 | Bmp4,12159:up                                                                                                                                                                                                                                                                                  |
| cellular response to misfolded protein                             | GO:0071218 | 2.25E-01 | 3.25E-01 | Sdf2l1,64136:up                                                                                                                                                                                                                                                                                |
| heart trabecula formation                                          | GO:0060347 | 2.25E-01 | 3.25E-01 | Tgfb3,21814:up                                                                                                                                                                                                                                                                                 |
| defense response to virus                                          | GO:0051607 | 2.26E-01 | 3.25E-01 | Lmcd1,30937:up Cxcl9,17329:up Oasl1,231655:up Ifit1,15957:up Oas3,246727:up Ifit3,15959:up                                                                                                                                                                                                     |
| cellular response to abiotic stimulus                              | GO:0071214 | 2.27E-01 | 3.27E-01 | Ankrd1,107765:down Hvcn1,74096:up Sfrp2,20319:up Sfrp1,20377:up Mme,17380:up                                                                                                                                                                                                                   |
| regulation of G-protein coupled receptor protein signaling pathway | GO:0008277 | 2.27E-01 | 3.27E-01 | Htr2b,15559:down Adm,11535:up C3,12266:up                                                                                                                                                                                                                                                      |
| organophosphate metabolic process                                  | GO:0019637 | 2.28E-01 | 3.28E-01 | Htr2b,15559:down Adm,11535:up Ampd3,11717:up Enpp5,83965:up Vegfa,22339:down Htr2a,15558:down Gfpt2,14584:down Cbr2,12409:up Enpp3,209558:down Fabp5,16592:up Wnt5a,22418:down Serinc2,230779:down Igf1,16000:up Pdxk,216134:up Plpp3,67916:up Ptgir,19222:up Enpp1,18605:down Uck2,80914:down |

|                                                                                           |            |          |          |                                                                                                                                                                                                                                                                                                                                                                                                                                                                                                              |
|-------------------------------------------------------------------------------------------|------------|----------|----------|--------------------------------------------------------------------------------------------------------------------------------------------------------------------------------------------------------------------------------------------------------------------------------------------------------------------------------------------------------------------------------------------------------------------------------------------------------------------------------------------------------------|
| positive regulation of hormone secretion                                                  | GO:0046887 | 2.28E-01 | 3.28E-01 | Glp1r,14652:down Fgfr1,14182:down Egfr,13649:down C1qtnf3,81799:down                                                                                                                                                                                                                                                                                                                                                                                                                                         |
| negative regulation of epithelial cell migration                                          | GO:0010633 | 2.29E-01 | 3.28E-01 | Tgfb3,21814:up Stc1,20855:up                                                                                                                                                                                                                                                                                                                                                                                                                                                                                 |
| negative regulation of autophagy                                                          | GO:0010507 | 2.29E-01 | 3.28E-01 | Htr2b,15559:down Hmox1,15368:up                                                                                                                                                                                                                                                                                                                                                                                                                                                                              |
| organic hydroxy compound catabolic process                                                | GO:1901616 | 2.29E-01 | 3.28E-01 | Sord,20322:up Akr1c18,105349:up                                                                                                                                                                                                                                                                                                                                                                                                                                                                              |
| regulation of epidermal growth factor receptor signaling pathway                          | GO:0042058 | 2.29E-01 | 3.28E-01 | Ceacam1,26365:up Errfi1,74155:down                                                                                                                                                                                                                                                                                                                                                                                                                                                                           |
| regulation of phospholipid metabolic process                                              | GO:1903725 | 2.29E-01 | 3.28E-01 | Htr2b,15559:down Htr2a,15558:down                                                                                                                                                                                                                                                                                                                                                                                                                                                                            |
| positive regulation of cell cycle process                                                 | GO:0090068 | 2.30E-01 | 3.31E-01 | Tnf,21926:up Fgfr1,14182:down Wnt5a,22418:down lgf2,16002:up lgf1,16000:up                                                                                                                                                                                                                                                                                                                                                                                                                                   |
| peptide hormone secretion                                                                 | GO:0030072 | 2.32E-01 | 3.33E-01 | Tnf,21926:up Pparg,19016:up Glp1r,14652:down Egfr,13649:down Sfrp1,20377:up Il1rn,16181:up                                                                                                                                                                                                                                                                                                                                                                                                                   |
| response to extracellular stimulus                                                        | GO:0009991 | 2.34E-01 | 3.36E-01 | Pparg,19016:up Gas6,14456:up Lmcd1,30937:up Hmox1,15368:up Sfrp4,20379:up Tfrc,22042:up Vdr,22337:down Sfrp2,20319:up Gatm,67092:down Plod2,26432:down Postn,50706:down                                                                                                                                                                                                                                                                                                                                      |
| positive regulation of alpha-beta T cell activation                                       | GO:0046635 | 2.35E-01 | 3.37E-01 | Ceacam1,26365:up Cd24a,12484:down                                                                                                                                                                                                                                                                                                                                                                                                                                                                            |
| regulation of plasma lipoprotein particle levels                                          | GO:0097006 | 2.35E-01 | 3.37E-01 | Lpl,16956:up Adipoq,11450:up                                                                                                                                                                                                                                                                                                                                                                                                                                                                                 |
| superoxide metabolic process                                                              | GO:0006801 | 2.35E-01 | 3.37E-01 | Tnf,21926:up Egfr,13649:down                                                                                                                                                                                                                                                                                                                                                                                                                                                                                 |
| negative regulation of peptide hormone secretion                                          | GO:0090278 | 2.35E-01 | 3.37E-01 | Pparg,19016:up Sfrp1,20377:up                                                                                                                                                                                                                                                                                                                                                                                                                                                                                |
| cellular response to ionizing radiation                                                   | GO:0071479 | 2.35E-01 | 3.37E-01 | Sfrp2,20319:up Sfrp1,20377:up                                                                                                                                                                                                                                                                                                                                                                                                                                                                                |
| positive regulation of cysteine-type endopeptidase activity involved in apoptotic process | GO:0043280 | 2.37E-01 | 3.39E-01 | Tnf,21926:up Pparg,19016:up F3,14066:up                                                                                                                                                                                                                                                                                                                                                                                                                                                                      |
| purine ribonucleotide metabolic process                                                   | GO:0009150 | 2.37E-01 | 3.39E-01 | Htr2b,15559:down Adm,11535:up Wnt5a,22418:down Ampd3,11717:up lgf1,16000:up Htr2a,15558:down Vegfa,22339:down Ptgir,19222:up Enpp1,18605:down                                                                                                                                                                                                                                                                                                                                                                |
| cellular catabolic process                                                                | GO:0044248 | 2.38E-01 | 3.40E-01 | Sfrp4,20379:up Mmp13,17386:up Enpp5,83965:up Uchl5,56207:up Sord,20322:up Ddah1,69219:down Blvrb,233016:up Npl,74091:up lgfbp3,16009:up Enpp3,209558:down Cdo1,12583:up Plk2,20620:down Akr1c18,105349:up Maob,109731:up Adipoq,11450:up Hal,15109:up lgf1,16000:up Sdf2l1,64136:up Hpse,15442:up Htr2b,15559:down Hp,15439:up Dram1,71712:up Plod2,26432:down Htr2a,15558:down Adamts1,2239337:down Anpep,16790:up Tnf,21926:up Lmcd1,30937:up Lpl,16956:up Hmox1,15368:up Pxdn,69675:down Enpp1,18605:down |
| positive regulation of cell size                                                          | GO:0045793 | 2.40E-01 | 3.40E-01 | Ret,19713:up                                                                                                                                                                                                                                                                                                                                                                                                                                                                                                 |
| regulation of type I interferon-mediated signaling pathway                                | GO:0060338 | 2.40E-01 | 3.40E-01 | Wnt5a,22418:down                                                                                                                                                                                                                                                                                                                                                                                                                                                                                             |
| positive regulation of cellular extravasation                                             | GO:0002693 | 2.40E-01 | 3.40E-01 | Ccl2,20296:up                                                                                                                                                                                                                                                                                                                                                                                                                                                                                                |
| female genitalia development                                                              | GO:0030540 | 2.40E-01 | 3.40E-01 | Wnt5a,22418:down                                                                                                                                                                                                                                                                                                                                                                                                                                                                                             |
| regulation of developmental pigmentation                                                  | GO:0048070 | 2.40E-01 | 3.40E-01 | Kitl,17311:up                                                                                                                                                                                                                                                                                                                                                                                                                                                                                                |
| pyrimidine nucleoside biosynthetic process                                                | GO:0046134 | 2.40E-01 | 3.40E-01 | Uck2,80914:down                                                                                                                                                                                                                                                                                                                                                                                                                                                                                              |
| calcium-dependent cell-cell adhesion via plasma membrane cell adhesion molecules          | GO:0016339 | 2.40E-01 | 3.40E-01 | Ceacam1,26365:up                                                                                                                                                                                                                                                                                                                                                                                                                                                                                             |
| embryonic skeletal joint development                                                      | GO:0072498 | 2.40E-01 | 3.40E-01 | Bmp4,12159:up                                                                                                                                                                                                                                                                                                                                                                                                                                                                                                |
| negative regulation of neurotransmitter transport                                         | GO:0051589 | 2.40E-01 | 3.40E-01 | Gpm6b,14758:up                                                                                                                                                                                                                                                                                                                                                                                                                                                                                               |
| epithelial cell differentiation involved in prostate gland development                    | GO:0060742 | 2.40E-01 | 3.40E-01 | Fgfr2,14183:up                                                                                                                                                                                                                                                                                                                                                                                                                                                                                               |
| regulation of superoxide anion generation                                                 | GO:0032928 | 2.40E-01 | 3.40E-01 | Egfr,13649:down                                                                                                                                                                                                                                                                                                                                                                                                                                                                                              |
| amino sugar catabolic process                                                             | GO:0046348 | 2.40E-01 | 3.40E-01 | Npl,74091:up                                                                                                                                                                                                                                                                                                                                                                                                                                                                                                 |

|                                                                                |            |          |          |                                                                                                                                                                                                                                                                                                                                                                                    |
|--------------------------------------------------------------------------------|------------|----------|----------|------------------------------------------------------------------------------------------------------------------------------------------------------------------------------------------------------------------------------------------------------------------------------------------------------------------------------------------------------------------------------------|
| negative regulation of glycoprotein metabolic process                          | GO:1903019 | 2.40E-01 | 3.40E-01 | Ptx3,19288:up                                                                                                                                                                                                                                                                                                                                                                      |
| positive regulation of meiotic nuclear division                                | GO:0045836 | 2.40E-01 | 3.40E-01 | Wnt5a,22418:down                                                                                                                                                                                                                                                                                                                                                                   |
| negative regulation of interleukin-1 beta production                           | GO:0032691 | 2.40E-01 | 3.40E-01 | Errfi1,74155:down                                                                                                                                                                                                                                                                                                                                                                  |
| protein hydroxylation                                                          | GO:0018126 | 2.40E-01 | 3.40E-01 | P4ha1,18451:down                                                                                                                                                                                                                                                                                                                                                                   |
| cell wall organization or biogenesis                                           | GO:0071554 | 2.40E-01 | 3.40E-01 | Sdf2l1,64136:up                                                                                                                                                                                                                                                                                                                                                                    |
| positive regulation of extracellular matrix organization                       | GO:1903055 | 2.40E-01 | 3.40E-01 | Tgfb2,21808:down                                                                                                                                                                                                                                                                                                                                                                   |
| CD4-positive or CD8-positive, alpha-beta T cell lineage commitment             | GO:0043369 | 2.40E-01 | 3.40E-01 | Ly9,17085:up                                                                                                                                                                                                                                                                                                                                                                       |
| epithelial to mesenchymal transition involved in endocardial cushion formation | GO:0003198 | 2.40E-01 | 3.40E-01 | Tgfb2,21808:down                                                                                                                                                                                                                                                                                                                                                                   |
| negative regulation of phagocytosis                                            | GO:0050765 | 2.40E-01 | 3.40E-01 | Adipoq,11450:up                                                                                                                                                                                                                                                                                                                                                                    |
| melanin biosynthetic process                                                   | GO:0042438 | 2.40E-01 | 3.40E-01 | Wnt5a,22418:down                                                                                                                                                                                                                                                                                                                                                                   |
| aldehyde biosynthetic process                                                  | GO:0046184 | 2.40E-01 | 3.40E-01 | Pdxk,216134:up                                                                                                                                                                                                                                                                                                                                                                     |
| response to sterol                                                             | GO:0036314 | 2.40E-01 | 3.40E-01 | Inhba,16323:down                                                                                                                                                                                                                                                                                                                                                                   |
| positive regulation of endothelial cell differentiation                        | GO:0045603 | 2.40E-01 | 3.40E-01 | Bmp4,12159:up                                                                                                                                                                                                                                                                                                                                                                      |
| norepinephrine metabolic process                                               | GO:0042415 | 2.40E-01 | 3.40E-01 | Epas1,13819:up                                                                                                                                                                                                                                                                                                                                                                     |
| regulation of nuclease activity                                                | GO:0032069 | 2.40E-01 | 3.40E-01 | Oas3,246727:up                                                                                                                                                                                                                                                                                                                                                                     |
| positive regulation of p38MAPK cascade                                         | GO:1900745 | 2.40E-01 | 3.40E-01 | Vegfa,22339:down                                                                                                                                                                                                                                                                                                                                                                   |
| positive regulation of cGMP metabolic process                                  | GO:0030825 | 2.40E-01 | 3.40E-01 | Wnt5a,22418:down                                                                                                                                                                                                                                                                                                                                                                   |
| telencephalon regionalization                                                  | GO:0021978 | 2.40E-01 | 3.40E-01 | Bmp4,12159:up                                                                                                                                                                                                                                                                                                                                                                      |
| positive regulation of histone deacetylation                                   | GO:0031065 | 2.40E-01 | 3.40E-01 | Vegfa,22339:down                                                                                                                                                                                                                                                                                                                                                                   |
| regulation of cell proliferation involved in heart morphogenesis               | GO:2000136 | 2.40E-01 | 3.40E-01 | Bmp4,12159:up                                                                                                                                                                                                                                                                                                                                                                      |
| pancreatic juice secretion                                                     | GO:0030157 | 2.40E-01 | 3.40E-01 | Mmp13,17386:up                                                                                                                                                                                                                                                                                                                                                                     |
| regulation of bicellular tight junction assembly                               | GO:2000810 | 2.40E-01 | 3.40E-01 | Tnf,21926:up                                                                                                                                                                                                                                                                                                                                                                       |
| response to UV-B                                                               | GO:0010224 | 2.40E-01 | 3.40E-01 | Mme,17380:up                                                                                                                                                                                                                                                                                                                                                                       |
| negative regulation of nucleobase-containing compound metabolic process        | GO:0045934 | 2.40E-01 | 3.40E-01 | Sfrp4,20379:up Ednrb,13618:up Epas1,13819:up Ankrd1,107765:down Vdr,22337:down Fabp4,11770:up Vegfa,22339:down Gas6,14456:up Pparg,19016:up Tnf,21926:up Loxl2,94352:down Loxl3,16950:down Lmcd1,30937:up Fgfr1,14182:down Hmox1,15368:up Sfrp1,20377:up Wnt5a,22418:down Ccl4,20303:up Grem1,23892:up Adipoq,11450:up Bmp4,12159:up Sfrp2,20319:up Fgfr2,14183:up S100a1,20193:up |
| transmembrane transport                                                        | GO:0055085 | 2.40E-01 | 3.40E-01 | Htr2b,15559:down Ednrb,13618:up Cxcl12,20315:up Htr2a,15558:down Slc16a4,229699:down Slc40a1,53945:up Gas6,14456:up Fxyd1,56188:up Hvcn1,74096:up Glp1r,14652:down Ccl12,20293:up Stc1,20855:up Kcnj15,16516:down Fxyd2,11936:up Bmp4,12159:up Ank,11732:down Tgfb2,21808:down Emb,13723:up S100a1,20193:up                                                                        |
| cellular response to peptide hormone stimulus                                  | GO:0071375 | 2.40E-01 | 3.41E-01 | Pparg,19016:up Enpp1,18605:down Igf2,16002:up Igf1,16000:up Adipoq,11450:up                                                                                                                                                                                                                                                                                                        |
| cellular response to extracellular stimulus                                    | GO:0031668 | 2.42E-01 | 3.42E-01 | Gas6,14456:up Lmcd1,30937:up Hmox1,15368:up Sfrp4,20379:up Tfrc,22042:up Vdr,22337:down Sfrp2,20319:up Plod2,26432:down Postn,50706:down                                                                                                                                                                                                                                           |
| platelet aggregation                                                           | GO:0070527 | 2.42E-01 | 3.42E-01 | Ceacam1,26365:up Serpine2,20720:up                                                                                                                                                                                                                                                                                                                                                 |
| T cell differentiation involved in immune response                             | GO:0002292 | 2.42E-01 | 3.42E-01 | Ly9,17085:up Clec4e,56619:up                                                                                                                                                                                                                                                                                                                                                       |
| negative regulation of protein import into nucleus                             | GO:0042308 | 2.42E-01 | 3.42E-01 | Gas6,14456:up C1qtnf3,81799:down                                                                                                                                                                                                                                                                                                                                                   |
| muscle fiber development                                                       | GO:0048747 | 2.42E-01 | 3.42E-01 | Vegfa,22339:down Bmp4,12159:up                                                                                                                                                                                                                                                                                                                                                     |

|                                                                                         |            |          |          |                                                                                                                                                                                                                                                                                                                                                                                                                                                                                                        |
|-----------------------------------------------------------------------------------------|------------|----------|----------|--------------------------------------------------------------------------------------------------------------------------------------------------------------------------------------------------------------------------------------------------------------------------------------------------------------------------------------------------------------------------------------------------------------------------------------------------------------------------------------------------------|
| protein complex subunit organization                                                    | GO:0071822 | 2.42E-01 | 3.43E-01 | Fam101b,76566:down P4ha1,18451:down Col5a2,12832:down Ice1,218333:down Pdgfc,54635:down Dpysl3,22240:down Mgp,17313:up Serpinh1,12406:down Shroom4,208431:down Vegfa,22339:down Cbr2,12409:up Tnf,21926:up Loxl2,94352:down Plk2,20620:down Trf,22041:up Col1a2,12843:down Cd24a,12484:down Col11a1,12814:down Ncam1,17967:down Hmox1,15368:up C1qtnf3,81799:down Tgfb3,21814:up C1qtnf6,72709:down Grem1,23892:up Adipoq,11450:up Col3a1,12825:down Sfrp2,20319:up Col5a1,12831:down Tgfb2,21808:down |
| regulation of peptide hormone secretion                                                 | GO:0090276 | 2.47E-01 | 3.49E-01 | Tnf,21926:up Pparg,19016:up Glp1r,14652:down Egfr,13649:down Sfrp1,20377:up                                                                                                                                                                                                                                                                                                                                                                                                                            |
| cell junction assembly                                                                  | GO:0034329 | 2.48E-01 | 3.50E-01 | Tnf,21926:up Gpm6b,14758:up Vegfa,22339:down Grem1,23892:up                                                                                                                                                                                                                                                                                                                                                                                                                                            |
| protein localization to organelle                                                       | GO:0033365 | 2.48E-01 | 3.51E-01 | Kdelr3,105785:down Tnf,21926:up Gas6,14456:up Akr1c18,105349:up Egfr,13649:down C1qtnf3,81799:down Bmpr1a,12166:down Ptgs2,19225:down Grem1,23892:up Igf1,16000:up Bmp4,12159:up Ceacam1,26365:up Sfrp2,20319:up Tgfb2,21808:down Htr2a,15558:down                                                                                                                                                                                                                                                     |
| regulation of ATP metabolic process                                                     | GO:1903578 | 2.49E-01 | 3.51E-01 | Htr2a,15558:down Igf1,16000:up                                                                                                                                                                                                                                                                                                                                                                                                                                                                         |
| body morphogenesis                                                                      | GO:0010171 | 2.49E-01 | 3.51E-01 | Tgfb2,21808:down Mmp2,17390:down                                                                                                                                                                                                                                                                                                                                                                                                                                                                       |
| negative regulation of peptide secretion                                                | GO:0002792 | 2.49E-01 | 3.51E-01 | Pparg,19016:up Sfrp1,20377:up                                                                                                                                                                                                                                                                                                                                                                                                                                                                          |
| regulation of insulin receptor signaling pathway                                        | GO:0046626 | 2.49E-01 | 3.51E-01 | Enpp1,18605:down Igf2,16002:up                                                                                                                                                                                                                                                                                                                                                                                                                                                                         |
| regulation of nucleoside metabolic process                                              | GO:0009118 | 2.49E-01 | 3.51E-01 | Htr2a,15558:down Igf1,16000:up                                                                                                                                                                                                                                                                                                                                                                                                                                                                         |
| regulation of ERBB signaling pathway                                                    | GO:1901184 | 2.49E-01 | 3.51E-01 | Ceacam1,26365:up Errfi1,74155:down                                                                                                                                                                                                                                                                                                                                                                                                                                                                     |
| anatomical structure homeostasis                                                        | GO:0060249 | 2.50E-01 | 3.52E-01 | Ceacam1,26365:up Trf,22041:up Egfr,13649:down Vegfa,22339:down Tfrc,22042:up Tnfrsf11b,18383:up Epas1,13819:up                                                                                                                                                                                                                                                                                                                                                                                         |
| endocrine process                                                                       | GO:0050886 | 2.51E-01 | 3.53E-01 | Fgfr1,14182:down C1qtnf3,81799:down Inhba,16323:down                                                                                                                                                                                                                                                                                                                                                                                                                                                   |
| intrinsic apoptotic signaling pathway in response to DNA damage                         | GO:0008630 | 2.51E-01 | 3.53E-01 | Tnf,21926:up Cxcl12,20315:up Hmox1,15368:up                                                                                                                                                                                                                                                                                                                                                                                                                                                            |
| cellular response to insulin stimulus                                                   | GO:0032869 | 2.52E-01 | 3.53E-01 | Pparg,19016:up Enpp1,18605:down Igf2,16002:up Adipoq,11450:up                                                                                                                                                                                                                                                                                                                                                                                                                                          |
| peptide secretion                                                                       | GO:0002790 | 2.53E-01 | 3.53E-01 | Tnf,21926:up Pparg,19016:up Glp1r,14652:down Egfr,13649:down Sfrp1,20377:up Il1rn,16181:up                                                                                                                                                                                                                                                                                                                                                                                                             |
| positive regulation of signal transduction by p53 class mediator                        | GO:1901798 | 2.53E-01 | 3.53E-01 | Ankrd1,107765:down                                                                                                                                                                                                                                                                                                                                                                                                                                                                                     |
| regulation of mononuclear cell migration                                                | GO:0071675 | 2.53E-01 | 3.53E-01 | Ccl2,20296:up                                                                                                                                                                                                                                                                                                                                                                                                                                                                                          |
| positive regulation of cellular response to oxidative stress                            | GO:1900409 | 2.53E-01 | 3.53E-01 | Tnf,21926:up                                                                                                                                                                                                                                                                                                                                                                                                                                                                                           |
| negative regulation of chemokine production                                             | GO:0032682 | 2.53E-01 | 3.53E-01 | C1qtnf3,81799:down                                                                                                                                                                                                                                                                                                                                                                                                                                                                                     |
| positive regulation of glycoprotein biosynthetic process                                | GO:0010560 | 2.53E-01 | 3.53E-01 | Igf1,16000:up                                                                                                                                                                                                                                                                                                                                                                                                                                                                                          |
| detection of temperature stimulus                                                       | GO:0016048 | 2.53E-01 | 3.53E-01 | Htr2a,15558:down                                                                                                                                                                                                                                                                                                                                                                                                                                                                                       |
| positive regulation of extrinsic apoptotic signaling pathway via death domain receptors | GO:1902043 | 2.53E-01 | 3.53E-01 | Sfrp1,20377:up                                                                                                                                                                                                                                                                                                                                                                                                                                                                                         |
| atrial septum morphogenesis                                                             | GO:0060413 | 2.53E-01 | 3.53E-01 | Tgfb2,21808:down                                                                                                                                                                                                                                                                                                                                                                                                                                                                                       |
| hematopoietic stem cell differentiation                                                 | GO:0060218 | 2.53E-01 | 3.53E-01 | Sfrp1,20377:up                                                                                                                                                                                                                                                                                                                                                                                                                                                                                         |
| basement membrane organization                                                          | GO:0071711 | 2.53E-01 | 3.53E-01 | Flrt2,399558:down                                                                                                                                                                                                                                                                                                                                                                                                                                                                                      |
| axonal fasciculation                                                                    | GO:0007413 | 2.53E-01 | 3.53E-01 | Wnt5a,22418:down                                                                                                                                                                                                                                                                                                                                                                                                                                                                                       |
| post-embryonic organ development                                                        | GO:0048569 | 2.53E-01 | 3.53E-01 | Vegfa,22339:down                                                                                                                                                                                                                                                                                                                                                                                                                                                                                       |
| regulation of interleukin-8 secretion                                                   | GO:2000482 | 2.53E-01 | 3.53E-01 | Wnt5a,22418:down                                                                                                                                                                                                                                                                                                                                                                                                                                                                                       |
| negative regulation of neurological system process                                      | GO:0031645 | 2.53E-01 | 3.53E-01 | Tnf,21926:up                                                                                                                                                                                                                                                                                                                                                                                                                                                                                           |
| positive regulation of protein export from nucleus                                      | GO:0046827 | 2.53E-01 | 3.53E-01 | Gas6,14456:up                                                                                                                                                                                                                                                                                                                                                                                                                                                                                          |

|                                                            |            |          |          |                                                                                                                                                                                                                                                                                                                                                                                                                                                                                                                                                                                                                                                                                                                                                                                                                                                 |
|------------------------------------------------------------|------------|----------|----------|-------------------------------------------------------------------------------------------------------------------------------------------------------------------------------------------------------------------------------------------------------------------------------------------------------------------------------------------------------------------------------------------------------------------------------------------------------------------------------------------------------------------------------------------------------------------------------------------------------------------------------------------------------------------------------------------------------------------------------------------------------------------------------------------------------------------------------------------------|
| negative regulation of interleukin-2 production            | GO:0032703 | 2.53E-01 | 3.53E-01 | Ceacam1,26365:up                                                                                                                                                                                                                                                                                                                                                                                                                                                                                                                                                                                                                                                                                                                                                                                                                                |
| regulation of hepatocyte proliferation                     | GO:2000345 | 2.53E-01 | 3.53E-01 | Ceacam1,26365:up                                                                                                                                                                                                                                                                                                                                                                                                                                                                                                                                                                                                                                                                                                                                                                                                                                |
| cellular response to catecholamine stimulus                | GO:0071870 | 2.53E-01 | 3.53E-01 | Adipoq,11450:up                                                                                                                                                                                                                                                                                                                                                                                                                                                                                                                                                                                                                                                                                                                                                                                                                                 |
| cell migration involved in gastrulation                    | GO:0042074 | 2.53E-01 | 3.53E-01 | Wnt5a,22418:down                                                                                                                                                                                                                                                                                                                                                                                                                                                                                                                                                                                                                                                                                                                                                                                                                                |
| trophoblast giant cell differentiation                     | GO:0060707 | 2.53E-01 | 3.53E-01 | Gjb5,14622:down                                                                                                                                                                                                                                                                                                                                                                                                                                                                                                                                                                                                                                                                                                                                                                                                                                 |
| ectoderm development                                       | GO:0007398 | 2.53E-01 | 3.53E-01 | Bmpr1a,12166:down                                                                                                                                                                                                                                                                                                                                                                                                                                                                                                                                                                                                                                                                                                                                                                                                                               |
| response to muscle stretch                                 | GO:0035994 | 2.53E-01 | 3.53E-01 | Ankrd1,107765:down                                                                                                                                                                                                                                                                                                                                                                                                                                                                                                                                                                                                                                                                                                                                                                                                                              |
| negative regulation of cardiac muscle hypertrophy          | GO:0010614 | 2.53E-01 | 3.53E-01 | Errfi1,74155:down                                                                                                                                                                                                                                                                                                                                                                                                                                                                                                                                                                                                                                                                                                                                                                                                                               |
| behavioral response to cocaine                             | GO:0048148 | 2.53E-01 | 3.53E-01 | Htr2a,15558:down                                                                                                                                                                                                                                                                                                                                                                                                                                                                                                                                                                                                                                                                                                                                                                                                                                |
| phosphatidylcholine biosynthetic process                   | GO:0006656 | 2.53E-01 | 3.53E-01 | Fabp5,16592:up                                                                                                                                                                                                                                                                                                                                                                                                                                                                                                                                                                                                                                                                                                                                                                                                                                  |
| regulation of interleukin-5 production                     | GO:0032674 | 2.53E-01 | 3.53E-01 | Il1r1,17082:down                                                                                                                                                                                                                                                                                                                                                                                                                                                                                                                                                                                                                                                                                                                                                                                                                                |
| DNA catabolic process, endonucleolytic                     | GO:0000737 | 2.53E-01 | 3.53E-01 | Igfbp3,16009:up                                                                                                                                                                                                                                                                                                                                                                                                                                                                                                                                                                                                                                                                                                                                                                                                                                 |
| interleukin-1-mediated signaling pathway                   | GO:0070498 | 2.53E-01 | 3.53E-01 | Il1rn,16181:up                                                                                                                                                                                                                                                                                                                                                                                                                                                                                                                                                                                                                                                                                                                                                                                                                                  |
| interleukin-5 production                                   | GO:0032634 | 2.53E-01 | 3.53E-01 | Il1r1,17082:down                                                                                                                                                                                                                                                                                                                                                                                                                                                                                                                                                                                                                                                                                                                                                                                                                                |
| cell proliferation involved in heart morphogenesis         | GO:0061323 | 2.53E-01 | 3.53E-01 | Bmp4,12159:up                                                                                                                                                                                                                                                                                                                                                                                                                                                                                                                                                                                                                                                                                                                                                                                                                                   |
| wound healing, spreading of epidermal cells                | GO:0035313 | 2.53E-01 | 3.53E-01 | Col5a1,12831:down                                                                                                                                                                                                                                                                                                                                                                                                                                                                                                                                                                                                                                                                                                                                                                                                                               |
| response to arsenic-containing substance                   | GO:0046685 | 2.53E-01 | 3.53E-01 | Hmox1,15368:up                                                                                                                                                                                                                                                                                                                                                                                                                                                                                                                                                                                                                                                                                                                                                                                                                                  |
| positive regulation of digestive system process            | GO:0060456 | 2.53E-01 | 3.53E-01 | Mmp13,17386:up                                                                                                                                                                                                                                                                                                                                                                                                                                                                                                                                                                                                                                                                                                                                                                                                                                  |
| hemoglobin metabolic process                               | GO:0020027 | 2.53E-01 | 3.53E-01 | Inhba,16323:down                                                                                                                                                                                                                                                                                                                                                                                                                                                                                                                                                                                                                                                                                                                                                                                                                                |
| negative regulation of protein tyrosine kinase activity    | GO:0061099 | 2.53E-01 | 3.53E-01 | Errfi1,74155:down                                                                                                                                                                                                                                                                                                                                                                                                                                                                                                                                                                                                                                                                                                                                                                                                                               |
| T-helper 17 type immune response                           | GO:0072538 | 2.53E-01 | 3.53E-01 | Ly9,17085:up                                                                                                                                                                                                                                                                                                                                                                                                                                                                                                                                                                                                                                                                                                                                                                                                                                    |
| regulation of podosome assembly                            | GO:0071801 | 2.53E-01 | 3.53E-01 | Tnf,21926:up                                                                                                                                                                                                                                                                                                                                                                                                                                                                                                                                                                                                                                                                                                                                                                                                                                    |
| pyrimidine nucleobase metabolic process                    | GO:0006206 | 2.53E-01 | 3.53E-01 | Uck2,80914:down                                                                                                                                                                                                                                                                                                                                                                                                                                                                                                                                                                                                                                                                                                                                                                                                                                 |
| negative regulation of phosphoprotein phosphatase activity | GO:0032515 | 2.53E-01 | 3.53E-01 | Tnf,21926:up                                                                                                                                                                                                                                                                                                                                                                                                                                                                                                                                                                                                                                                                                                                                                                                                                                    |
| gonadotropin secretion                                     | GO:0032274 | 2.53E-01 | 3.53E-01 | Inhba,16323:down                                                                                                                                                                                                                                                                                                                                                                                                                                                                                                                                                                                                                                                                                                                                                                                                                                |
| regulation of cellular catabolic process                   | GO:0031329 | 2.54E-01 | 3.54E-01 | Htr2b,15559:down Tnf,21926:up Plk2,20620:down Lmcd1,30937:up Dram1,71712:up Hp,15439:up Hmox1,15368:up Sfrp4,20379:up Igf1,16000:up Uchl5,56207:up Plod2,26432:down Htr2a,15558:down Igfbp3,16009:up                                                                                                                                                                                                                                                                                                                                                                                                                                                                                                                                                                                                                                            |
| regulation of RNA biosynthetic process                     | GO:2001141 | 2.54E-01 | 3.54E-01 | Fstl3,83554:down Ice1,218333:down Tfec,21426:up Sfrp4,20379:up Ednrb,13618:up Epas1,13819:up Ankrd1,107765:down Htra3,78558:down Uchl5,56207:up Lyl1,17095:up Sdpr,20324:down Loxl2,94352:down Loxl3,16950:down Trf,22041:up Wnt5a,22418:down Bmpr1a,12166:down Ccl4,20303:up Adipoq,11450:up Bmp4,12159:up Igf1,16000:up Ret,19713:up Ppp3,67916:up Creb3l1,26427:down Fgfr2,14183:up Prl2c2,18811:up Efemp1,216616:up Inhba,16323:down Rasl11a,68895:up Bnc2,242509:down Ccl3,20302:up Vdr,22337:down Fabp4,11770:up Vegfa,22339:down Igf2,16002:up Slc40a1,53945:up Pparg,19016:up Gas6,14456:up Tnf,21926:up Glp1r,14652:down Lmcd1,30937:up Fgfr1,14182:down Egfr,13649:down Hmox1,15368:up Sfrp1,20377:up Sulf1,240725:down Tgfb3,21814:up Grem1,23892:up Phf11d,219132:up Sfrp2,20319:up Tbx15,21384:down Npnt,114249:up S100a1,20193:up |

|                                                                                             |            |          |          |                                                                                                                                                                                                                                                                                                                                                                                                                                                                                                                                                                                                                                                                                                                                                                                                                                                                                                                                                                                                                                                                                                                                                                                                                                                                                                                                      |
|---------------------------------------------------------------------------------------------|------------|----------|----------|--------------------------------------------------------------------------------------------------------------------------------------------------------------------------------------------------------------------------------------------------------------------------------------------------------------------------------------------------------------------------------------------------------------------------------------------------------------------------------------------------------------------------------------------------------------------------------------------------------------------------------------------------------------------------------------------------------------------------------------------------------------------------------------------------------------------------------------------------------------------------------------------------------------------------------------------------------------------------------------------------------------------------------------------------------------------------------------------------------------------------------------------------------------------------------------------------------------------------------------------------------------------------------------------------------------------------------------|
| organic substance biosynthetic process                                                      | GO:1901576 | 2.55E-01 | 3.55E-01 | Fstl3,83554:down Adm,11535:up Tfec,21426:up Sfrp4,20379:up C3,12266:up Ankrd1,107765:down Serp1nh1,12406:down Lyl1,17095:up Ggt5,23887:up Loxl2,94352:down Loxl3,16950:down Trf,22041:up Wnt5a,22418:down Adipoq,11450:up Bmp4,12159:up lgf1,16000:up Tgfb2,21808:down Ptgir,19222:up Fgfr2,14183:up Htr2b,15559:down Prl2c2,18811:up Efemp1,216616:up Vdr,22337:down Fabp4,11770:up Htr2a,15558:down Slc40a1,53945:up Gas6,14456:up Egfr,13649:down Sfrp1,20377:up C1qtnf3,81799:down Tgfb3,21814:up Ceacam1,26365:up Sfrp2,20319:up Npnt,114249:up S100a1,20193:up lce1,218333:down Aldh1a2,19378:up Ccl2,20296:up Pdgc,54635:down Ednrb,13618:up Ampd3,11717:up Epas1,13819:up Htra1c18,105349:up Fabp5,16592:up Bmpr1a,12166:down Ccl4,20303:up Chst11,58250:down Gatm,67092:down Ret,19713:up Prg4,96875:down Vegfb,22340:up Sdf2l1,64136:up Pdxk,216134:up Aldh1a3,56847:down Ppp3,67916:up Creb3l1,26427:down Kitl,17311:up Ras11a,68895:up Inhba,16323:down Bnc2,242509:down Ccl3,20302:up Vegfa,22339:down Gfpt2,14584:down lgf2,16002:up Pparg,19016:up Tnf,21926:up Lmcd1,30937:up Glp1r,14652:down Fgfr1,14182:down Hmox1,15368:up Lpl,16956:up Has2,15117:down Sulf1,240725:down Ptgs2,19225:down Grem1,23892:up Phf11d,219132:up Tbx15,21384:down Col5a1,12831:down Uck2,80914:down Errfi1,74155:down Enpp1,18605:down |
| execution phase of apoptosis                                                                | GO:0097194 | 2.55E-01 | 3.55E-01 | Cd24a,12484:down lgfbp3,16009:up                                                                                                                                                                                                                                                                                                                                                                                                                                                                                                                                                                                                                                                                                                                                                                                                                                                                                                                                                                                                                                                                                                                                                                                                                                                                                                     |
| embryonic pattern specification                                                             | GO:009880  | 2.55E-01 | 3.55E-01 | Wnt5a,22418:down Fgfr2,14183:up                                                                                                                                                                                                                                                                                                                                                                                                                                                                                                                                                                                                                                                                                                                                                                                                                                                                                                                                                                                                                                                                                                                                                                                                                                                                                                      |
| positive regulation of lipid transport                                                      | GO:0032370 | 2.55E-01 | 3.55E-01 | Fam132b,227358:down Adipoq,11450:up                                                                                                                                                                                                                                                                                                                                                                                                                                                                                                                                                                                                                                                                                                                                                                                                                                                                                                                                                                                                                                                                                                                                                                                                                                                                                                  |
| response to ethanol                                                                         | GO:0045471 | 2.55E-01 | 3.55E-01 | Ccl7,20306:up Cdo1,12583:up                                                                                                                                                                                                                                                                                                                                                                                                                                                                                                                                                                                                                                                                                                                                                                                                                                                                                                                                                                                                                                                                                                                                                                                                                                                                                                          |
| response to carbohydrate                                                                    | GO:009743  | 2.56E-01 | 3.55E-01 | Gas6,14456:up Glp1r,14652:down lgf1,16000:up Adipoq,11450:up                                                                                                                                                                                                                                                                                                                                                                                                                                                                                                                                                                                                                                                                                                                                                                                                                                                                                                                                                                                                                                                                                                                                                                                                                                                                         |
| maintenance of cell number                                                                  | GO:0098727 | 2.56E-01 | 3.55E-01 | Fgfr1,14182:down Sfrp1,20377:up Bmpr1a,12166:down lgf1,16000:up                                                                                                                                                                                                                                                                                                                                                                                                                                                                                                                                                                                                                                                                                                                                                                                                                                                                                                                                                                                                                                                                                                                                                                                                                                                                      |
| nucleobase-containing compound catabolic process                                            | GO:0034655 | 2.56E-01 | 3.55E-01 | Htr2a,15558:down lgfbp3,16009:up Enpp1,18605:down Enpp3,209558:down Enpp5,83965:up lgf1,16000:up                                                                                                                                                                                                                                                                                                                                                                                                                                                                                                                                                                                                                                                                                                                                                                                                                                                                                                                                                                                                                                                                                                                                                                                                                                     |
| response to hydrogen peroxide                                                               | GO:0042542 | 2.56E-01 | 3.56E-01 | Hp,15439:up Hmox1,15368:up Mmp2,17390:down                                                                                                                                                                                                                                                                                                                                                                                                                                                                                                                                                                                                                                                                                                                                                                                                                                                                                                                                                                                                                                                                                                                                                                                                                                                                                           |
| positive regulation of cation transmembrane transport                                       | GO:1904064 | 2.56E-01 | 3.56E-01 | Fxyd1,56188:up S100a1,20193:up Bmp4,12159:up                                                                                                                                                                                                                                                                                                                                                                                                                                                                                                                                                                                                                                                                                                                                                                                                                                                                                                                                                                                                                                                                                                                                                                                                                                                                                         |
| B cell differentiation                                                                      | GO:0030183 | 2.56E-01 | 3.56E-01 | Cd24a,12484:down Lyl1,17095:up Sfrp1,20377:up                                                                                                                                                                                                                                                                                                                                                                                                                                                                                                                                                                                                                                                                                                                                                                                                                                                                                                                                                                                                                                                                                                                                                                                                                                                                                        |
| carbohydrate catabolic process                                                              | GO:0016052 | 2.56E-01 | 3.56E-01 | Sord,20322:up Htr2a,15558:down lgf1,16000:up                                                                                                                                                                                                                                                                                                                                                                                                                                                                                                                                                                                                                                                                                                                                                                                                                                                                                                                                                                                                                                                                                                                                                                                                                                                                                         |
| detection of stimulus                                                                       | GO:0051606 | 2.57E-01 | 3.57E-01 | Tnf,21926:up Col11a1,12814:down Htr2a,15558:down Serpine2,20720:up lgf1,16000:up                                                                                                                                                                                                                                                                                                                                                                                                                                                                                                                                                                                                                                                                                                                                                                                                                                                                                                                                                                                                                                                                                                                                                                                                                                                     |
| cellular response to peptide                                                                | GO:1901653 | 2.57E-01 | 3.57E-01 | Pparg,19016:up Enpp1,18605:down lgf2,16002:up lgf1,16000:up Adipoq,11450:up                                                                                                                                                                                                                                                                                                                                                                                                                                                                                                                                                                                                                                                                                                                                                                                                                                                                                                                                                                                                                                                                                                                                                                                                                                                          |
| carbohydrate derivative biosynthetic process                                                | GO:1901137 | 2.58E-01 | 3.58E-01 | Htr2b,15559:down Adm,11535:up Has2,15117:down Ampd3,11717:up lgf1,16000:up Chst11,58250:down Htr2a,15558:down Vegfb,22340:up Sdf2l1,64136:up Gfpt2,14584:down Ptgir,19222:up Uck2,80914:down Man2a2,140481:up                                                                                                                                                                                                                                                                                                                                                                                                                                                                                                                                                                                                                                                                                                                                                                                                                                                                                                                                                                                                                                                                                                                        |
| regulation of autophagy                                                                     | GO:0010506 | 2.58E-01 | 3.58E-01 | Htr2b,15559:down Plk2,20620:down Lmcd1,30937:up Dram1,71712:up Plod2,26432:down Hmox1,15368:up Sfrp4,20379:up                                                                                                                                                                                                                                                                                                                                                                                                                                                                                                                                                                                                                                                                                                                                                                                                                                                                                                                                                                                                                                                                                                                                                                                                                        |
| G-protein coupled receptor signaling pathway, coupled to cyclic nucleotide second messenger | GO:0007187 | 2.60E-01 | 3.60E-01 | Htr2b,15559:down Glp1r,14652:down Htr2a,15558:down Ptgir,19222:up                                                                                                                                                                                                                                                                                                                                                                                                                                                                                                                                                                                                                                                                                                                                                                                                                                                                                                                                                                                                                                                                                                                                                                                                                                                                    |
| cell cycle G1/S phase transition                                                            | GO:0044843 | 2.60E-01 | 3.60E-01 | Plk2,20620:down Egfr,13649:down Inhba,16323:down Susd2,71733:up                                                                                                                                                                                                                                                                                                                                                                                                                                                                                                                                                                                                                                                                                                                                                                                                                                                                                                                                                                                                                                                                                                                                                                                                                                                                      |
| negative regulation of DNA metabolic process                                                | GO:0051053 | 2.61E-01 | 3.62E-01 | Ankrd1,107765:down Pparg,19016:up Adipoq,11450:up                                                                                                                                                                                                                                                                                                                                                                                                                                                                                                                                                                                                                                                                                                                                                                                                                                                                                                                                                                                                                                                                                                                                                                                                                                                                                    |
| regulation of smooth muscle contraction                                                     | GO:0006940 | 2.62E-01 | 3.63E-01 | Ptgs2,19225:down Npnt,114249:up                                                                                                                                                                                                                                                                                                                                                                                                                                                                                                                                                                                                                                                                                                                                                                                                                                                                                                                                                                                                                                                                                                                                                                                                                                                                                                      |
| purine nucleotide metabolic process                                                         | GO:0006163 | 2.63E-01 | 3.64E-01 | Htr2b,15559:down Adm,11535:up Wnt5a,22418:down Ampd3,11717:up lgf1,16000:up Htr2a,15558:down Vegfa,22339:down Ptgir,19222:up Enpp1,18605:down                                                                                                                                                                                                                                                                                                                                                                                                                                                                                                                                                                                                                                                                                                                                                                                                                                                                                                                                                                                                                                                                                                                                                                                        |
| negative regulation of cell projection organization                                         | GO:0031345 | 2.63E-01 | 3.65E-01 | Plk2,20620:down Efemp1,216616:up Wnt5a,22418:down Dpys3,22240:down                                                                                                                                                                                                                                                                                                                                                                                                                                                                                                                                                                                                                                                                                                                                                                                                                                                                                                                                                                                                                                                                                                                                                                                                                                                                   |
| regulation of peptide secretion                                                             | GO:0002791 | 2.64E-01 | 3.65E-01 | Tnf,21926:up Pparg,19016:up Glp1r,14652:down Egfr,13649:down Sfrp1,20377:up                                                                                                                                                                                                                                                                                                                                                                                                                                                                                                                                                                                                                                                                                                                                                                                                                                                                                                                                                                                                                                                                                                                                                                                                                                                          |
| glucose homeostasis                                                                         | GO:0042593 | 2.64E-01 | 3.65E-01 | Pparg,19016:up Gas6,14456:up C1qtnf3,81799:down lgf1,16000:up Adipoq,11450:up                                                                                                                                                                                                                                                                                                                                                                                                                                                                                                                                                                                                                                                                                                                                                                                                                                                                                                                                                                                                                                                                                                                                                                                                                                                        |
| cellular ketone metabolic process                                                           | GO:0042180 | 2.64E-01 | 3.65E-01 | Pparg,19016:up Akr1c18,105349:up Fam132b,227358:down C1qtnf3,81799:down Adipoq,11450:up                                                                                                                                                                                                                                                                                                                                                                                                                                                                                                                                                                                                                                                                                                                                                                                                                                                                                                                                                                                                                                                                                                                                                                                                                                              |
| carbohydrate homeostasis                                                                    | GO:0033500 | 2.64E-01 | 3.65E-01 | Pparg,19016:up Gas6,14456:up C1qtnf3,81799:down lgf1,16000:up Adipoq,11450:up                                                                                                                                                                                                                                                                                                                                                                                                                                                                                                                                                                                                                                                                                                                                                                                                                                                                                                                                                                                                                                                                                                                                                                                                                                                        |
| amelogenesis                                                                                | GO:0097186 | 2.67E-01 | 3.65E-01 | Fam20a,208659:down                                                                                                                                                                                                                                                                                                                                                                                                                                                                                                                                                                                                                                                                                                                                                                                                                                                                                                                                                                                                                                                                                                                                                                                                                                                                                                                   |
| response to fluid shear stress                                                              | GO:0034405 | 2.67E-01 | 3.65E-01 | Ptgs2,19225:down                                                                                                                                                                                                                                                                                                                                                                                                                                                                                                                                                                                                                                                                                                                                                                                                                                                                                                                                                                                                                                                                                                                                                                                                                                                                                                                     |
| negative regulation of B cell proliferation                                                 | GO:0030889 | 2.67E-01 | 3.65E-01 | Cd24a,12484:down                                                                                                                                                                                                                                                                                                                                                                                                                                                                                                                                                                                                                                                                                                                                                                                                                                                                                                                                                                                                                                                                                                                                                                                                                                                                                                                     |
| response to catecholamine                                                                   | GO:0071869 | 2.67E-01 | 3.65E-01 | Adipoq,11450:up                                                                                                                                                                                                                                                                                                                                                                                                                                                                                                                                                                                                                                                                                                                                                                                                                                                                                                                                                                                                                                                                                                                                                                                                                                                                                                                      |

|                                                                                                   |            |          |          |                                                                                    |
|---------------------------------------------------------------------------------------------------|------------|----------|----------|------------------------------------------------------------------------------------|
| negative regulation of membrane potential                                                         | GO:0045837 | 2.67E-01 | 3.65E-01 | Il1rn,16181:up                                                                     |
| regulation of transcription from RNA polymerase I promoter                                        | GO:0006356 | 2.67E-01 | 3.65E-01 | Rasl11a,68895:up                                                                   |
| negative regulation of release of cytochrome c from mitochondria                                  | GO:0090201 | 2.67E-01 | 3.65E-01 | Igf1,16000:up                                                                      |
| positive regulation of response to oxidative stress                                               | GO:1902884 | 2.67E-01 | 3.65E-01 | Tnf,21926:up                                                                       |
| modulation of transcription in other organism involved in symbiotic interaction                   | GO:0052312 | 2.67E-01 | 3.65E-01 | Ccl4,20303:up                                                                      |
| modulation by host of viral transcription                                                         | GO:0043921 | 2.67E-01 | 3.65E-01 | Ccl4,20303:up                                                                      |
| melanin metabolic process                                                                         | GO:0006582 | 2.67E-01 | 3.65E-01 | Wnt5a,22418:down                                                                   |
| regulation of natural killer cell differentiation                                                 | GO:0032823 | 2.67E-01 | 3.65E-01 | Gas6,14456:up                                                                      |
| regulation of tyrosine phosphorylation of Stat5 protein                                           | GO:0042522 | 2.67E-01 | 3.65E-01 | Igf1,16000:up                                                                      |
| positive regulation of protein processing                                                         | GO:0010954 | 2.67E-01 | 3.65E-01 | C3,12266:up                                                                        |
| arginine metabolic process                                                                        | GO:0006525 | 2.67E-01 | 3.65E-01 | Ddah1,69219:down                                                                   |
| integrin activation                                                                               | GO:0033622 | 2.67E-01 | 3.65E-01 | Cd24a,12484:down                                                                   |
| response to misfolded protein                                                                     | GO:0051788 | 2.67E-01 | 3.65E-01 | Sdf2l1,64136:up                                                                    |
| retinal ganglion cell axon guidance                                                               | GO:0031290 | 2.67E-01 | 3.65E-01 | Vegfa,22339:down                                                                   |
| dendritic cell migration                                                                          | GO:0036336 | 2.67E-01 | 3.65E-01 | Gas6,14456:up                                                                      |
| positive regulation of cholesterol transport                                                      | GO:0032376 | 2.67E-01 | 3.65E-01 | Adipoq,11450:up                                                                    |
| regulation of synaptic transmission, dopaminergic                                                 | GO:0032225 | 2.67E-01 | 3.65E-01 | Ptgs2,19225:down                                                                   |
| regulation of transcription from RNA polymerase III promoter                                      | GO:0006359 | 2.67E-01 | 3.65E-01 | Ice1,218333:down                                                                   |
| negative regulation of smooth muscle contraction                                                  | GO:0045986 | 2.67E-01 | 3.65E-01 | Ptgs2,19225:down                                                                   |
| regulation of receptor binding                                                                    | GO:1900120 | 2.67E-01 | 3.65E-01 | Adipoq,11450:up                                                                    |
| positive regulation of fatty acid oxidation                                                       | GO:0046321 | 2.67E-01 | 3.65E-01 | Pparg,19016:up                                                                     |
| positive regulation of sterol transport                                                           | GO:0032373 | 2.67E-01 | 3.65E-01 | Adipoq,11450:up                                                                    |
| negative regulation of myeloid cell apoptotic process                                             | GO:0033033 | 2.67E-01 | 3.65E-01 | Kitl,17311:up                                                                      |
| regulation of smooth muscle cell apoptotic process                                                | GO:0034391 | 2.67E-01 | 3.65E-01 | Igf1,16000:up                                                                      |
| regulation of membrane protein ectodomain proteolysis                                             | GO:0051043 | 2.67E-01 | 3.65E-01 | Tnf,21926:up                                                                       |
| modulation by host of symbiont transcription                                                      | GO:0052472 | 2.67E-01 | 3.65E-01 | Ccl4,20303:up                                                                      |
| response to prostaglandin E                                                                       | GO:0034695 | 2.67E-01 | 3.65E-01 | Tgfb3,21814:up                                                                     |
| negative regulation of endoplasmic reticulum stress-induced intrinsic apoptotic signaling pathway | GO:1902236 | 2.67E-01 | 3.65E-01 | Creb3l1,26427:down                                                                 |
| smooth muscle cell apoptotic process                                                              | GO:0034390 | 2.67E-01 | 3.65E-01 | Igf1,16000:up                                                                      |
| regulation of protein kinase A signaling                                                          | GO:0010738 | 2.67E-01 | 3.65E-01 | Adipoq,11450:up                                                                    |
| positive regulation of proteolysis                                                                | GO:0045862 | 2.68E-01 | 3.67E-01 | Tnf,21926:up Pparg,19016:up Plk2,20620:down Sfrp2,20319:up C3,12266:up F3,14066:up |
| heart looping                                                                                     | GO:0001947 | 2.69E-01 | 3.67E-01 | Wnt5a,22418:down Aldh1a2,19378:up                                                  |

|                                                              |            |          |          |                                                                                                                                                                                                                                                                                                                                                                                                                                                                                                                                                                                                                                                                                                                                                                                                                   |
|--------------------------------------------------------------|------------|----------|----------|-------------------------------------------------------------------------------------------------------------------------------------------------------------------------------------------------------------------------------------------------------------------------------------------------------------------------------------------------------------------------------------------------------------------------------------------------------------------------------------------------------------------------------------------------------------------------------------------------------------------------------------------------------------------------------------------------------------------------------------------------------------------------------------------------------------------|
| regulation of calcium ion transmembrane transporter activity | GO:1901019 | 2.69E-01 | 3.67E-01 | S100a1,20193:up Bmp4,12159:up                                                                                                                                                                                                                                                                                                                                                                                                                                                                                                                                                                                                                                                                                                                                                                                     |
| cellular localization                                        | GO:0051641 | 2.74E-01 | 3.74E-01 | lce1,218333:down Adm,11535:up Ccl2,20296:up Mmp13,17386:up Ankrd1,107765:down Gpm6b,14758:up Clec4n,56620:up Postn,50706:down Akr1c18,105349:up Cd24a,12484:down Ncam1,17967:down Wnt5a,22418:down Bmpr1a,12166:down Il1rn,16181:up Maob,109731:up Adipoq,11450:up Bmp4,12159:up Igf1,16000:up Tgfb2,21808:down Creb3l1,26427:down Fgfr2,14183:up Il1rl1,17082:down Clec4e,56619:up Htr2b,15559:down Inhba,16323:down Ccl3,20302:up Cxd12,20315:up Htr2a,15558:down Serpine2,20720:up Lrrc15,74488:down Kdelr3,105785:down Pparg,19016:up Gas6,14456:up Tnf,21926:up Glp1r,14652:down Egfr,13649:down Fgfr1,14182:down Sec23a,20334:down Lpl,16956:up Hmox1,15368:up Sfrp1,20377:up C1qtnf3,81799:down Cd4,12504:up Ptgs2,19225:down Sncg,20618:up Grem1,23892:up Ceacam1,26365:up Sfrp2,20319:up Synt13,80976:up |
| leukocyte activation involved in immune response             | GO:0002366 | 2.74E-01 | 3.75E-01 | Ly9,17085:up Hmox1,15368:up Cx3cr1,13051:down Tfrc,22042:up Clec4e,56619:up                                                                                                                                                                                                                                                                                                                                                                                                                                                                                                                                                                                                                                                                                                                                       |
| regulation of B cell proliferation                           | GO:0030888 | 2.76E-01 | 3.76E-01 | Cd24a,12484:down Tfrc,22042:up                                                                                                                                                                                                                                                                                                                                                                                                                                                                                                                                                                                                                                                                                                                                                                                    |
| cell activation involved in immune response                  | GO:0002263 | 2.78E-01 | 3.79E-01 | Ly9,17085:up Hmox1,15368:up Cx3cr1,13051:down Tfrc,22042:up Clec4e,56619:up                                                                                                                                                                                                                                                                                                                                                                                                                                                                                                                                                                                                                                                                                                                                       |
| establishment or maintenance of cell polarity                | GO:0007163 | 2.80E-01 | 3.79E-01 | Ptk7,71461:down Wnt5a,22418:down Mark1,226778:up Igf1,16000:up                                                                                                                                                                                                                                                                                                                                                                                                                                                                                                                                                                                                                                                                                                                                                    |
| removal of superoxide radicals                               | GO:0019430 | 2.80E-01 | 3.79E-01 | Tnf,21926:up                                                                                                                                                                                                                                                                                                                                                                                                                                                                                                                                                                                                                                                                                                                                                                                                      |
| positive regulation of protein maturation                    | GO:1903319 | 2.80E-01 | 3.79E-01 | C3,12266:up                                                                                                                                                                                                                                                                                                                                                                                                                                                                                                                                                                                                                                                                                                                                                                                                       |
| regulation of interleukin-6 biosynthetic process             | GO:0045408 | 2.80E-01 | 3.79E-01 | Prg4,96875:down                                                                                                                                                                                                                                                                                                                                                                                                                                                                                                                                                                                                                                                                                                                                                                                                   |
| steroid catabolic process                                    | GO:0006706 | 2.80E-01 | 3.79E-01 | Akr1c18,105349:up                                                                                                                                                                                                                                                                                                                                                                                                                                                                                                                                                                                                                                                                                                                                                                                                 |
| regulation of macrophage differentiation                     | GO:0045649 | 2.80E-01 | 3.79E-01 | Adipoq,11450:up                                                                                                                                                                                                                                                                                                                                                                                                                                                                                                                                                                                                                                                                                                                                                                                                   |
| cellular response to dexamethasone stimulus                  | GO:0071549 | 2.80E-01 | 3.79E-01 | Bmp4,12159:up                                                                                                                                                                                                                                                                                                                                                                                                                                                                                                                                                                                                                                                                                                                                                                                                     |
| low-density lipoprotein particle clearance                   | GO:0034383 | 2.80E-01 | 3.79E-01 | Adipoq,11450:up                                                                                                                                                                                                                                                                                                                                                                                                                                                                                                                                                                                                                                                                                                                                                                                                   |
| lymphangiogenesis                                            | GO:0001946 | 2.80E-01 | 3.79E-01 | Vegfa,22339:down                                                                                                                                                                                                                                                                                                                                                                                                                                                                                                                                                                                                                                                                                                                                                                                                  |
| regulation of collateral sprouting                           | GO:0048670 | 2.80E-01 | 3.79E-01 | Crabp2,12904:down                                                                                                                                                                                                                                                                                                                                                                                                                                                                                                                                                                                                                                                                                                                                                                                                 |
| cell proliferation in external granule layer                 | GO:0021924 | 2.80E-01 | 3.79E-01 | Igf1,16000:up                                                                                                                                                                                                                                                                                                                                                                                                                                                                                                                                                                                                                                                                                                                                                                                                     |
| negative regulation of NF-kappaB import into nucleus         | GO:0042347 | 2.80E-01 | 3.79E-01 | C1qtnf3,81799:down                                                                                                                                                                                                                                                                                                                                                                                                                                                                                                                                                                                                                                                                                                                                                                                                |
| regulation of B cell apoptotic process                       | GO:0002902 | 2.80E-01 | 3.79E-01 | Cd24a,12484:down                                                                                                                                                                                                                                                                                                                                                                                                                                                                                                                                                                                                                                                                                                                                                                                                  |
| fibrinolysis                                                 | GO:0042730 | 2.80E-01 | 3.79E-01 | Serping1,12258:up                                                                                                                                                                                                                                                                                                                                                                                                                                                                                                                                                                                                                                                                                                                                                                                                 |
| transepithelial transport                                    | GO:0070633 | 2.80E-01 | 3.79E-01 | Ednrb,13618:up                                                                                                                                                                                                                                                                                                                                                                                                                                                                                                                                                                                                                                                                                                                                                                                                    |
| pyridine-containing compound biosynthetic process            | GO:0072525 | 2.80E-01 | 3.79E-01 | Pdkx,216134:up                                                                                                                                                                                                                                                                                                                                                                                                                                                                                                                                                                                                                                                                                                                                                                                                    |
| peroxisome proliferator activated receptor signaling pathway | GO:0035357 | 2.80E-01 | 3.79E-01 | Pparg,19016:up                                                                                                                                                                                                                                                                                                                                                                                                                                                                                                                                                                                                                                                                                                                                                                                                    |
| negative regulation of viral entry into host cell            | GO:0046597 | 2.80E-01 | 3.79E-01 | Ptx3,19288:up                                                                                                                                                                                                                                                                                                                                                                                                                                                                                                                                                                                                                                                                                                                                                                                                     |
| sensory perception of temperature stimulus                   | GO:0050951 | 2.80E-01 | 3.79E-01 | Htr2a,15558:down                                                                                                                                                                                                                                                                                                                                                                                                                                                                                                                                                                                                                                                                                                                                                                                                  |
| regulation of tumor necrosis factor biosynthetic process     | GO:0042534 | 2.80E-01 | 3.79E-01 | Errfi1,74155:down                                                                                                                                                                                                                                                                                                                                                                                                                                                                                                                                                                                                                                                                                                                                                                                                 |
| tumor necrosis factor biosynthetic process                   | GO:0042533 | 2.80E-01 | 3.79E-01 | Errfi1,74155:down                                                                                                                                                                                                                                                                                                                                                                                                                                                                                                                                                                                                                                                                                                                                                                                                 |
| response to amine                                            | GO:0014075 | 2.80E-01 | 3.79E-01 | Htr2b,15559:down                                                                                                                                                                                                                                                                                                                                                                                                                                                                                                                                                                                                                                                                                                                                                                                                  |
| neural nucleus development                                   | GO:0048857 | 2.80E-01 | 3.79E-01 | Aldh1a3,56847:down                                                                                                                                                                                                                                                                                                                                                                                                                                                                                                                                                                                                                                                                                                                                                                                                |
| positive regulation of glycoprotein metabolic process        | GO:1903020 | 2.80E-01 | 3.79E-01 | Igf1,16000:up                                                                                                                                                                                                                                                                                                                                                                                                                                                                                                                                                                                                                                                                                                                                                                                                     |
| alditol metabolic process                                    | GO:0019400 | 2.80E-01 | 3.79E-01 | Sord,20322:up                                                                                                                                                                                                                                                                                                                                                                                                                                                                                                                                                                                                                                                                                                                                                                                                     |
| regulation of urine volume                                   | GO:0035809 | 2.80E-01 | 3.79E-01 | Ednrb,13618:up                                                                                                                                                                                                                                                                                                                                                                                                                                                                                                                                                                                                                                                                                                                                                                                                    |



|                                                                           |            |          |          |                                                                                                                                                                                                                             |
|---------------------------------------------------------------------------|------------|----------|----------|-----------------------------------------------------------------------------------------------------------------------------------------------------------------------------------------------------------------------------|
| negative regulation of protein localization to plasma membrane            | GO:1903077 | 2.80E-01 | 3.79E-01 | Lrrc15,74488:down                                                                                                                                                                                                           |
| positive regulation of translational initiation                           | GO:0045948 | 2.80E-01 | 3.79E-01 | Tnf,21926:up                                                                                                                                                                                                                |
| mononuclear cell migration                                                | GO:0071674 | 2.80E-01 | 3.79E-01 | Ccl2,20296:up                                                                                                                                                                                                               |
| alditol phosphate metabolic process                                       | GO:0052646 | 2.80E-01 | 3.79E-01 | Serinc2,230779:down                                                                                                                                                                                                         |
| toll-like receptor 3 signaling pathway                                    | GO:0034138 | 2.80E-01 | 3.79E-01 | Tnf,21926:up                                                                                                                                                                                                                |
| lymph vessel morphogenesis                                                | GO:0036303 | 2.80E-01 | 3.79E-01 | Vegfa,22339:down                                                                                                                                                                                                            |
| regulation of cAMP-mediated signaling                                     | GO:0043949 | 2.80E-01 | 3.79E-01 | Ptgir,19222:up                                                                                                                                                                                                              |
| negative regulation of muscle hypertrophy                                 | GO:0014741 | 2.80E-01 | 3.79E-01 | Errf1,74155:down                                                                                                                                                                                                            |
| negative regulation of viral transcription                                | GO:0032897 | 2.80E-01 | 3.79E-01 | Ccl4,20303:up                                                                                                                                                                                                               |
| CD8-positive, alpha-beta T cell activation                                | GO:0036037 | 2.80E-01 | 3.79E-01 | Ceacam1,26365:up                                                                                                                                                                                                            |
| positive regulation of chondrocyte differentiation                        | GO:0032332 | 2.80E-01 | 3.79E-01 | Loxl2,94352:down                                                                                                                                                                                                            |
| pyrimidine ribonucleoside metabolic process                               | GO:0046131 | 2.80E-01 | 3.79E-01 | Uck2,80914:down                                                                                                                                                                                                             |
| cerebellar granule cell precursor proliferation                           | GO:0021930 | 2.80E-01 | 3.79E-01 | Igf1,16000:up                                                                                                                                                                                                               |
| carbohydrate derivative catabolic process                                 | GO:1901136 | 2.81E-01 | 3.79E-01 | Hpse,15442:up Npl,74091:up Adamts12,239337:down                                                                                                                                                                             |
| establishment of cell polarity                                            | GO:0030010 | 2.81E-01 | 3.79E-01 | Ptk7,71461:down Wnt5a,22418:down Mark1,226778:up                                                                                                                                                                            |
| regulation of tyrosine phosphorylation of STAT protein                    | GO:0042509 | 2.82E-01 | 3.81E-01 | Crlf1,12931:down Igf1,16000:up                                                                                                                                                                                              |
| glycolytic process                                                        | GO:0006096 | 2.82E-01 | 3.81E-01 | Htr2a,15558:down Igf1,16000:up                                                                                                                                                                                              |
| ADP phosphorylation                                                       | GO:0006757 | 2.82E-01 | 3.81E-01 | Htr2a,15558:down Igf1,16000:up                                                                                                                                                                                              |
| regulation of intracellular steroid hormone receptor signaling pathway    | GO:0033143 | 2.82E-01 | 3.81E-01 | Sfrp1,20377:up Igf1,16000:up                                                                                                                                                                                                |
| positive regulation of cysteine-type endopeptidase activity               | GO:2001056 | 2.86E-01 | 3.85E-01 | Tnf,21926:up Pparg,19016:up F3,14066:up                                                                                                                                                                                     |
| monovalent inorganic cation transport                                     | GO:0015672 | 2.86E-01 | 3.86E-01 | Hvcn1,74096:up Fxyd1,56188:up Kcnj15,16516:down Sncg,20618:up Fxyd2,11936:up Maob,109731:up Gpm6b,14758:up Cxcl12,20315:up Htr2a,15558:down Serpine2,20720:up                                                               |
| multicellular organism reproduction                                       | GO:0032504 | 2.88E-01 | 3.89E-01 | Egfr,13649:down Sfrp1,20377:up Inhba,16323:down Ptgs2,19225:down Ednrb,13618:up Plat,18791:down Igf1,16000:up Bmp4,12159:up Vdr,22337:down Cxcl12,20315:up Vegfa,22339:down Mmp2,17390:down Serpine2,20720:up Kitl,17311:up |
| glutamine family amino acid metabolic process                             | GO:0009064 | 2.89E-01 | 3.90E-01 | Ddah1,69219:down Gfpt2,14584:down                                                                                                                                                                                           |
| gluconeogenesis                                                           | GO:0006094 | 2.89E-01 | 3.90E-01 | C1qtnf3,81799:down Adipoq,11450:up                                                                                                                                                                                          |
| negative regulation of nucleocytoplasmic transport                        | GO:0046823 | 2.89E-01 | 3.90E-01 | Gas6,14456:up C1qtnf3,81799:down                                                                                                                                                                                            |
| regulation of phosphatase activity                                        | GO:0010921 | 2.90E-01 | 3.91E-01 | Tnf,21926:up Tgfb2,21808:down Npnt,114249:up                                                                                                                                                                                |
| cardiac muscle hypertrophy in response to stress                          | GO:0014898 | 2.93E-01 | 3.91E-01 | Errf1,74155:down                                                                                                                                                                                                            |
| positive regulation of protein targeting to membrane                      | GO:0090314 | 2.93E-01 | 3.91E-01 | Ccl2,20296:up                                                                                                                                                                                                               |
| negative regulation of epidermal growth factor receptor signaling pathway | GO:0042059 | 2.93E-01 | 3.91E-01 | Errf1,74155:down                                                                                                                                                                                                            |
| cellular response to superoxide                                           | GO:0071451 | 2.93E-01 | 3.91E-01 | Tnf,21926:up                                                                                                                                                                                                                |
| negative regulation of cell junction assembly                             | GO:1901889 | 2.93E-01 | 3.91E-01 | Tnf,21926:up                                                                                                                                                                                                                |
| cell proliferation in hindbrain                                           | GO:0021534 | 2.93E-01 | 3.91E-01 | Igf1,16000:up                                                                                                                                                                                                               |
| muscle hypertrophy in response to stress                                  | GO:0003299 | 2.93E-01 | 3.91E-01 | Errf1,74155:down                                                                                                                                                                                                            |

|                                                                             |            |          |          |                     |
|-----------------------------------------------------------------------------|------------|----------|----------|---------------------|
| negative regulation of growth of symbiont involved in interaction with host | GO:0044146 | 2.93E-01 | 3.91E-01 | Tnf,21926:up        |
| positive regulation of meiotic cell cycle                                   | GO:0051446 | 2.93E-01 | 3.91E-01 | Wnt5a,22418:down    |
| regulation of regulatory T cell differentiation                             | GO:0045589 | 2.93E-01 | 3.91E-01 | Ctla2a,13024:down   |
| auditory receptor cell development                                          | GO:0060117 | 2.93E-01 | 3.91E-01 | Fgfr1,14182:down    |
| positive regulation of catecholamine secretion                              | GO:0033605 | 2.93E-01 | 3.91E-01 | Cxcl12,20315:up     |
| type I interferon signaling pathway                                         | GO:0060337 | 2.93E-01 | 3.91E-01 | Wnt5a,22418:down    |
| lymphoid progenitor cell differentiation                                    | GO:0002320 | 2.93E-01 | 3.91E-01 | Bmp4,12159:up       |
| purine nucleoside bisphosphate metabolic process                            | GO:0034032 | 2.93E-01 | 3.91E-01 | Enpp1,18605:down    |
| serine phosphorylation of STAT protein                                      | GO:0042501 | 2.93E-01 | 3.91E-01 | Ret,19713:up        |
| ribonucleoside bisphosphate metabolic process                               | GO:0033875 | 2.93E-01 | 3.91E-01 | Enpp1,18605:down    |
| cellular response to pH                                                     | GO:0071467 | 2.93E-01 | 3.91E-01 | Hvcn1,74096:up      |
| L-glutamate transport                                                       | GO:0015813 | 2.93E-01 | 3.91E-01 | Tnf,21926:up        |
| positive regulation of isotype switching                                    | GO:0045830 | 2.93E-01 | 3.91E-01 | Tfrc,22042:up       |
| regulation of epidermal growth factor-activated receptor activity           | GO:0007176 | 2.93E-01 | 3.91E-01 | Errfi1,74155:down   |
| positive regulation of oligodendrocyte differentiation                      | GO:0048714 | 2.93E-01 | 3.91E-01 | Pparg,19016:up      |
| regulation of endoplasmic reticulum unfolded protein response               | GO:1900101 | 2.93E-01 | 3.91E-01 | Sdf2l1,64136:up     |
| nitric-oxide synthase biosynthetic process                                  | GO:0051767 | 2.93E-01 | 3.91E-01 | Ccl2,20296:up       |
| positive regulation of focal adhesion assembly                              | GO:0051894 | 2.93E-01 | 3.91E-01 | Vegfa,22339:down    |
| positive regulation of fatty acid transport                                 | GO:2000193 | 2.93E-01 | 3.91E-01 | Fam132b,227358:down |
| nucleoside bisphosphate metabolic process                                   | GO:0033865 | 2.93E-01 | 3.91E-01 | Enpp1,18605:down    |
| myeloid dendritic cell differentiation                                      | GO:0043011 | 2.93E-01 | 3.91E-01 | Tnfsf9,21950:up     |
| regulation of nitric-oxide synthase biosynthetic process                    | GO:0051769 | 2.93E-01 | 3.91E-01 | Ccl2,20296:up       |
| negative regulation of growth of symbiont in host                           | GO:0044130 | 2.93E-01 | 3.91E-01 | Tnf,21926:up        |
| retina vasculature development in camera-type eye                           | GO:0061298 | 2.93E-01 | 3.91E-01 | Vegfa,22339:down    |
| regulation of cholesterol efflux                                            | GO:0010874 | 2.93E-01 | 3.91E-01 | Adipoq,11450:up     |
| positive regulation of sodium ion transmembrane transport                   | GO:1902307 | 2.93E-01 | 3.91E-01 | Fxyd1,56188:up      |
| cellular response to oxygen radical                                         | GO:0071450 | 2.93E-01 | 3.91E-01 | Tnf,21926:up        |
| multi-organism membrane organization                                        | GO:0044803 | 2.93E-01 | 3.91E-01 | Gas6,14456:up       |
| interleukin-6 biosynthetic process                                          | GO:0042226 | 2.93E-01 | 3.91E-01 | Prg4,96875:down     |
| response to dexamethasone                                                   | GO:0071548 | 2.93E-01 | 3.91E-01 | Bmp4,12159:up       |

|                                                                 |             |          |          |                                                                                                                                                                                                                                                                                                                                                                                                                                                                                                                                                                                                                                                                                                                                                                                                                                                                          |
|-----------------------------------------------------------------|-------------|----------|----------|--------------------------------------------------------------------------------------------------------------------------------------------------------------------------------------------------------------------------------------------------------------------------------------------------------------------------------------------------------------------------------------------------------------------------------------------------------------------------------------------------------------------------------------------------------------------------------------------------------------------------------------------------------------------------------------------------------------------------------------------------------------------------------------------------------------------------------------------------------------------------|
| regulation of RNA metabolic process                             | GO:0051252  | 2.95E-01 | 3.94E-01 | Fstl3,83554:down Ice1,218333:down Tfec,21426:up Sfrp4,20379:up Ednrb,13618:up Epas1,13819:up Ankr d1,107765:down Htra3,78558:down Uchl5,56207:up Lyl1,17095:up Sdpr,20324:down Loxl2,94352:down L oxl3,16950:down Trf,22041:up Wnt5a,22418:down Bmpr1a,12166:down Ccl4,20303:up Adipoq,11450:up  Bmp4,12159:up Igf1,16000:up Ret,19713:up Plpp3,67916:up Creb3l1,26427:down Fgfr2,14183:up Prl2c2, 18811:up Efemp1,216616:up Inhba,16323:down Rasl11a,68895:up Bnc2,242509:down Ccl3,20302:up Vdr, 22337:down Fabbp4,11770:up Vegfa,22339:down Oas3,246727:up Igf2,16002:up Slc40a1,53945:up Pparg, 19016:up Gas6,14456:up Tnf,21926:up Glp1r,14652:down Lmcd1,30937:up Fgfr1,14182:down Egfr,13649: down Hmox1,15368:up Sfrp1,20377:up Sulf1,240725:down Tgfb3,21814:up Grem1,23892:up Phf11d,219 132:up Sfrp2,20319:up Tbx15,21384:down Npnt,114249:up S100a1,20193:up |
| regulation of cation transmembrane transport                    | GO:1904062  | 2.95E-01 | 3.94E-01 | Fxyd1,56188:up Tgfb2,21808:down Fxyd2,11936:up S100a1,20193:up Bmp4,12159:up                                                                                                                                                                                                                                                                                                                                                                                                                                                                                                                                                                                                                                                                                                                                                                                             |
| regulation of B cell activation                                 | GO:0050864  | 2.95E-01 | 3.94E-01 | Cd24a,12484:down Sfrp1,20377:up Tfrc,22042:up                                                                                                                                                                                                                                                                                                                                                                                                                                                                                                                                                                                                                                                                                                                                                                                                                            |
| positive regulation of apoptotic signaling pathway              | GO:2001235  | 2.96E-01 | 3.94E-01 | Tnfrsf12a,27279:down Sfrp1,20377:up Tgfb2,21808:down Inhba,16323:down                                                                                                                                                                                                                                                                                                                                                                                                                                                                                                                                                                                                                                                                                                                                                                                                    |
| actin-mediated cell contraction                                 | GO:0070252  | 2.96E-01 | 3.94E-01 | Fxyd1,56188:up Stc1,20855:up                                                                                                                                                                                                                                                                                                                                                                                                                                                                                                                                                                                                                                                                                                                                                                                                                                             |
| positive regulation of cytokine biosynthetic process            | GO:0042108  | 2.96E-01 | 3.94E-01 | Tnf,21926:up Wnt5a,22418:down                                                                                                                                                                                                                                                                                                                                                                                                                                                                                                                                                                                                                                                                                                                                                                                                                                            |
| endoplasmic reticulum unfolded protein response                 | GO:0030968  | 2.96E-01 | 3.94E-01 | Sdf2l1,64136:up Creb3l1,26427:down                                                                                                                                                                                                                                                                                                                                                                                                                                                                                                                                                                                                                                                                                                                                                                                                                                       |
| activation of immune response                                   | GO:0002253  | 2.96E-01 | 3.94E-01 | Tnf,21926:up C1s1,50908:up Serping1,12258:up C1s2,317677:up C3,12266:up C1rb,667277:up                                                                                                                                                                                                                                                                                                                                                                                                                                                                                                                                                                                                                                                                                                                                                                                   |
| regulation of transcription, DNA-templated                      | GO:0006355  | 2.98E-01 | 3.97E-01 | Fstl3,83554:down Ice1,218333:down Tfec,21426:up Sfrp4,20379:up Ednrb,13618:up Epas1,13819:up Ankr d1,107765:down Htra3,78558:down Uchl5,56207:up Lyl1,17095:up Sdpr,20324:down Loxl2,94352:down L oxl3,16950:down Trf,22041:up Wnt5a,22418:down Bmpr1a,12166:down Adipoq,11450:up Bmp4,12159:u p Igf1,16000:up Ret,19713:up Plpp3,67916:up Creb3l1,26427:down Fgfr2,14183:up Prl2c2,18811:up Efem p1,216616:up Inhba,16323:down Rasl11a,68895:up Bnc2,242509:down Ccl3,20302:up Vdr,22337:down F abp4,11770:up Vegfa,22339:down Igf2,16002:up Slc40a1,53945:up Pparg,19016:up Gas6,14456:up Tnf,2 1926:up Glp1r,14652:down Lmcd1,30937:up Fgfr1,14182:down Egfr,13649:down Hmox1,15368:up Sfrp1, 20377:up Sulf1,240725:down Tgfb3,21814:up Grem1,23892:up Sfrp2,20319:up Phf11d,219132:up Tbx15, 21384:down Npnt,114249:up S100a1,20193:up                               |
| purine ribonucleotide biosynthetic process                      | GO:0009152  | 2.99E-01 | 3.98E-01 | Htr2b,15559:down Adm,11535:up Htr2a,15558:down Ptgir,19222:up Ampd3,11717:up Igf1,16000:up                                                                                                                                                                                                                                                                                                                                                                                                                                                                                                                                                                                                                                                                                                                                                                               |
| glycerolipid metabolic process                                  | GO:0046486  | 2.99E-01 | 3.98E-01 | Htr2b,15559:down Fabbp5,16592:up Lpl,16956:up Htr2a,15558:down C3,12266:up Serinc2,230779:down                                                                                                                                                                                                                                                                                                                                                                                                                                                                                                                                                                                                                                                                                                                                                                           |
| regulation of nucleic acid-templated transcription              | GO:1903506  | 3.01E-01 | 4.00E-01 | Fstl3,83554:down Ice1,218333:down Tfec,21426:up Sfrp4,20379:up Ednrb,13618:up Epas1,13819:up Ankr d1,107765:down Htra3,78558:down Uchl5,56207:up Lyl1,17095:up Sdpr,20324:down Loxl2,94352:down L oxl3,16950:down Trf,22041:up Wnt5a,22418:down Bmpr1a,12166:down Adipoq,11450:up Bmp4,12159:u p Igf1,16000:up Ret,19713:up Plpp3,67916:up Creb3l1,26427:down Fgfr2,14183:up Prl2c2,18811:up Efem p1,216616:up Inhba,16323:down Rasl11a,68895:up Bnc2,242509:down Ccl3,20302:up Vdr,22337:down F abp4,11770:up Vegfa,22339:down Igf2,16002:up Slc40a1,53945:up Pparg,19016:up Gas6,14456:up Tnf,2 1926:up Glp1r,14652:down Lmcd1,30937:up Fgfr1,14182:down Egfr,13649:down Hmox1,15368:up Sfrp1, 20377:up Sulf1,240725:down Tgfb3,21814:up Grem1,23892:up Sfrp2,20319:up Phf11d,219132:up Tbx15, 21384:down Npnt,114249:up S100a1,20193:up                               |
| dicarboxylic acid transport                                     | GO:0006835  | 3.02E-01 | 4.02E-01 | Tnf,21926:up Il1rn,16181:up                                                                                                                                                                                                                                                                                                                                                                                                                                                                                                                                                                                                                                                                                                                                                                                                                                              |
| defense response to Gram-positive bacterium                     | GO:0050830  | 3.02E-01 | 4.02E-01 | Tnf,21926:up Adm,11535:up                                                                                                                                                                                                                                                                                                                                                                                                                                                                                                                                                                                                                                                                                                                                                                                                                                                |
| positive regulation of cAMP biosynthetic process                | GO:0030819  | 3.02E-01 | 4.02E-01 | Adm,11535:up Ptgir,19222:up                                                                                                                                                                                                                                                                                                                                                                                                                                                                                                                                                                                                                                                                                                                                                                                                                                              |
| positive regulation of response to DNA damage stimulus          | GO:2001022  | 3.02E-01 | 4.02E-01 | Ankrd1,107765:down Egfr,13649:down                                                                                                                                                                                                                                                                                                                                                                                                                                                                                                                                                                                                                                                                                                                                                                                                                                       |
| cytoplasmic transport                                           | GO:0016482  | 3.04E-01 | 4.02E-01 | Htr2b,15559:down Htr2a,15558:down Gas6,14456:up Tnf,21926:up Akr1c18,105349:up Glp1r,14652:dow n Egfr,13649:down Sec23a,20334:down C1qtnf3,81799:down Cd4,12504:up Bmpr1a,12166:down Ptgs2,1 9225:down Grem1,23892:up Bmp4,12159:up Igf1,16000:up Ceacam1,26365:up Sfrp2,20319:up Tgfb2,218 08:down                                                                                                                                                                                                                                                                                                                                                                                                                                                                                                                                                                      |
| anatomical structure arrangement                                | GO:0048532  | 3.06E-01 | 4.02E-01 | Bmpr1a,12166:down                                                                                                                                                                                                                                                                                                                                                                                                                                                                                                                                                                                                                                                                                                                                                                                                                                                        |
| misfolded or incompletely synthesized protein catabolic process | GO:0006515  | 3.06E-01 | 4.02E-01 | Sdf2l1,64136:up                                                                                                                                                                                                                                                                                                                                                                                                                                                                                                                                                                                                                                                                                                                                                                                                                                                          |
| amino acid catabolic process                                    | GO:0009065  | 3.06E-01 | 4.02E-01 | Ddah1,69219:down                                                                                                                                                                                                                                                                                                                                                                                                                                                                                                                                                                                                                                                                                                                                                                                                                                                         |
| mannosylation                                                   | GO:00097502 | 3.06E-01 | 4.02E-01 | Sdf2l1,64136:up                                                                                                                                                                                                                                                                                                                                                                                                                                                                                                                                                                                                                                                                                                                                                                                                                                                          |
| regulation of macrophage chemotaxis                             | GO:0010758  | 3.06E-01 | 4.02E-01 | Ccl2,20296:up                                                                                                                                                                                                                                                                                                                                                                                                                                                                                                                                                                                                                                                                                                                                                                                                                                                            |
| vascular endothelial growth factor signaling pathway            | GO:0038084  | 3.06E-01 | 4.02E-01 | Vegfa,22339:down                                                                                                                                                                                                                                                                                                                                                                                                                                                                                                                                                                                                                                                                                                                                                                                                                                                         |

|                                                                    |            |          |          |                                    |
|--------------------------------------------------------------------|------------|----------|----------|------------------------------------|
| interleukin-8 secretion                                            | GO:0072606 | 3.06E-01 | 4.02E-01 | Wnt5a,22418:down                   |
| inorganic cation import into cell                                  | GO:0098659 | 3.06E-01 | 4.02E-01 | Trf,22041:up                       |
| long term synaptic depression                                      | GO:0060292 | 3.06E-01 | 4.02E-01 | Plk2,20620:down                    |
| macromolecular complex remodeling                                  | GO:0034367 | 3.06E-01 | 4.02E-01 | Lpl,16956:up                       |
| embryonic digestive tract morphogenesis                            | GO:0048557 | 3.06E-01 | 4.02E-01 | Fgfr2,14183:up                     |
| negative regulation of oxidoreductase activity                     | GO:0051354 | 3.06E-01 | 4.02E-01 | Hp,15439:up                        |
| regulation of triglyceride biosynthetic process                    | GO:0010866 | 3.06E-01 | 4.02E-01 | C3,12266:up                        |
| regulation of growth of symbiont in host                           | GO:0044126 | 3.06E-01 | 4.02E-01 | Tnf,21926:up                       |
| positive regulation of adherens junction organization              | GO:1903393 | 3.06E-01 | 4.02E-01 | Vegfa,22339:down                   |
| inorganic ion import into cell                                     | GO:0099587 | 3.06E-01 | 4.02E-01 | Trf,22041:up                       |
| negative regulation of regulated secretory pathway                 | GO:1903306 | 3.06E-01 | 4.02E-01 | Hmox1,15368:up                     |
| cell proliferation involved in kidney development                  | GO:0072111 | 3.06E-01 | 4.02E-01 | Bmp4,12159:up                      |
| positive regulation of protein complex disassembly                 | GO:0043243 | 3.06E-01 | 4.02E-01 | Tnf,21926:up                       |
| podosome assembly                                                  | GO:0071800 | 3.06E-01 | 4.02E-01 | Tnf,21926:up                       |
| nephron tubule formation                                           | GO:0072079 | 3.06E-01 | 4.02E-01 | Grem1,23892:up                     |
| plasma lipoprotein particle remodeling                             | GO:0034369 | 3.06E-01 | 4.02E-01 | Lpl,16956:up                       |
| microglial cell activation                                         | GO:0001774 | 3.06E-01 | 4.02E-01 | Cx3cr1,13051:down                  |
| N-glycan processing                                                | GO:0006491 | 3.06E-01 | 4.02E-01 | Man2a2,140481:up                   |
| protein-lipid complex remodeling                                   | GO:0034368 | 3.06E-01 | 4.02E-01 | Lpl,16956:up                       |
| negative regulation of ERBB signaling pathway                      | GO:1901185 | 3.06E-01 | 4.02E-01 | Errfi1,74155:down                  |
| negative regulation of lipid catabolic process                     | GO:0050995 | 3.06E-01 | 4.02E-01 | Tnf,21926:up                       |
| cardiac muscle adaptation                                          | GO:0014887 | 3.06E-01 | 4.02E-01 | Errfi1,74155:down                  |
| atrial septum development                                          | GO:0003283 | 3.06E-01 | 4.02E-01 | Tgfb2,21808:down                   |
| protein mannosylation                                              | GO:0035268 | 3.06E-01 | 4.02E-01 | Sdf2l1,64136:up                    |
| positive regulation of erythrocyte differentiation                 | GO:0045648 | 3.06E-01 | 4.02E-01 | Inhba,16323:down                   |
| metanephric nephron epithelium development                         | GO:0072243 | 3.06E-01 | 4.02E-01 | Adipoq,11450:up                    |
| negative regulation of calcium ion import                          | GO:0090281 | 3.06E-01 | 4.02E-01 | Tgfb2,21808:down                   |
| modulation of growth of symbiont involved in interaction with host | GO:0044144 | 3.06E-01 | 4.02E-01 | Tnf,21926:up                       |
| acute inflammatory response to antigenic stimulus                  | GO:0002438 | 3.06E-01 | 4.02E-01 | C3,12266:up                        |
| GTP metabolic process                                              | GO:0046039 | 3.06E-01 | 4.02E-01 | Ampd3,11717:up                     |
| tyrosine phosphorylation of STAT protein                           | GO:0007260 | 3.09E-01 | 4.06E-01 | Crif1,12931:down Igf1,16000:up     |
| cellular response to unfolded protein                              | GO:0034620 | 3.09E-01 | 4.06E-01 | Sdf2l1,64136:up Creb3l1,26427:down |
| regulation of cardiac muscle contraction                           | GO:0055117 | 3.09E-01 | 4.06E-01 | Fxyd1,56188:up Stc1,20855:up       |

|                                                                           |            |          |          |                                                                                                                                                                                                                                                                                                                                                                                                                                                                                                                                                                                                                                                                                                                                                                                                                                                                                                                                                                              |
|---------------------------------------------------------------------------|------------|----------|----------|------------------------------------------------------------------------------------------------------------------------------------------------------------------------------------------------------------------------------------------------------------------------------------------------------------------------------------------------------------------------------------------------------------------------------------------------------------------------------------------------------------------------------------------------------------------------------------------------------------------------------------------------------------------------------------------------------------------------------------------------------------------------------------------------------------------------------------------------------------------------------------------------------------------------------------------------------------------------------|
| adenylate cyclase-inhibiting G-protein coupled receptor signaling pathway | GO:0007193 | 3.09E-01 | 4.06E-01 | Htr2b,15559:down Htr2a,15558:down                                                                                                                                                                                                                                                                                                                                                                                                                                                                                                                                                                                                                                                                                                                                                                                                                                                                                                                                            |
| determination of heart left/right asymmetry                               | GO:0061371 | 3.09E-01 | 4.06E-01 | Wnt5a,22418:down Aldh1a2,19378:up                                                                                                                                                                                                                                                                                                                                                                                                                                                                                                                                                                                                                                                                                                                                                                                                                                                                                                                                            |
| regulation of calcium ion transmembrane transport                         | GO:1903169 | 3.10E-01 | 4.07E-01 | Tgfb2,21808:down S100a1,20193:up Bmp4,12159:up                                                                                                                                                                                                                                                                                                                                                                                                                                                                                                                                                                                                                                                                                                                                                                                                                                                                                                                               |
| plasma membrane organization                                              | GO:0007009 | 3.15E-01 | 4.13E-01 | Tnf,21926:up Gas6,14456:up Col5a1,12831:down Tgfb2,21808:down Lrrc15,74488:down Adipoq,11450:up                                                                                                                                                                                                                                                                                                                                                                                                                                                                                                                                                                                                                                                                                                                                                                                                                                                                              |
| regulation of T cell differentiation                                      | GO:0045580 | 3.15E-01 | 4.13E-01 | Ctla2a,13024:down Tnfsf9,21950:up Bmp4,12159:up                                                                                                                                                                                                                                                                                                                                                                                                                                                                                                                                                                                                                                                                                                                                                                                                                                                                                                                              |
| embryonic heart tube morphogenesis                                        | GO:0003143 | 3.16E-01 | 4.13E-01 | Wnt5a,22418:down Aldh1a2,19378:up                                                                                                                                                                                                                                                                                                                                                                                                                                                                                                                                                                                                                                                                                                                                                                                                                                                                                                                                            |
| cell redox homeostasis                                                    | GO:0045454 | 3.16E-01 | 4.13E-01 | Pdia5,72599:down Nxn,18230:down                                                                                                                                                                                                                                                                                                                                                                                                                                                                                                                                                                                                                                                                                                                                                                                                                                                                                                                                              |
| lens development in camera-type eye                                       | GO:0002088 | 3.16E-01 | 4.13E-01 | Fgfr2,14183:up Bmp4,12159:up                                                                                                                                                                                                                                                                                                                                                                                                                                                                                                                                                                                                                                                                                                                                                                                                                                                                                                                                                 |
| nucleoside triphosphate metabolic process                                 | GO:0009141 | 3.17E-01 | 4.13E-01 | Htr2a,15558:down Enpp1,18605:down Ampd3,11717:up Enpp3,209558:down Igf1,16000:up                                                                                                                                                                                                                                                                                                                                                                                                                                                                                                                                                                                                                                                                                                                                                                                                                                                                                             |
| aromatic compound biosynthetic process                                    | GO:0019438 | 3.17E-01 | 4.13E-01 | Fstl3,83554:down Ice1,218333:down Adm,11535:up Tfec,21426:up Sfrp4,20379:up Ednrb,13618:up Ampd3,11717:up Epas1,13819:up Ankrd1,107765:down Htra3,78558:down Uchl5,56207:up Ly11,17095:up Sdpr,20324:down Loxl2,94352:down Loxl3,16950:down Trf,22041:up Wnt5a,22418:down Bmpr1a,12166:down Ccl4,20303:up Adipoq,11450:up Bmp4,12159:up Igf1,16000:up Ret,19713:up Tgfb2,21808:down Pdxk,216134:up Plpp3,67916:up Ptgir,19222:up Creb3l1,26427:down Fgfr2,14183:up Htr2b,15559:down Prl2c2,18811:up Efemp1,216616:up Inhba,16323:down Rasl1a,68895:up Bnc2,242509:down Ccl3,20302:up Vdr,22337:down Fabp4,11770:up Vegfa,22339:down Htr2a,15558:down Igf2,16002:up Slc40a1,53945:up Pparg,19016:up Gas6,14456:up Tnf,21926:up Glp1r,14652:down Lmcd1,30937:up Fgfr1,14182:down Egfr,13649:down Hmox1,15368:up Sfrp1,20377:up Sulf1,240725:down Tgfb3,21814:up Grem1,23892:up Phf11d,219132:up Sfrp2,20319:up Tbx15,21384:down Npnt,114249:up Uck2,80914:down S100a1,20193:up |
| purine nucleotide biosynthetic process                                    | GO:0006164 | 3.18E-01 | 4.13E-01 | Htr2b,15559:down Adm,11535:up Htr2a,15558:down Ptgir,19222:up Ampd3,11717:up Igf1,16000:up                                                                                                                                                                                                                                                                                                                                                                                                                                                                                                                                                                                                                                                                                                                                                                                                                                                                                   |
| positive regulation of filopodium assembly                                | GO:0051491 | 3.18E-01 | 4.13E-01 | Dpysl3,22240:down                                                                                                                                                                                                                                                                                                                                                                                                                                                                                                                                                                                                                                                                                                                                                                                                                                                                                                                                                            |
| T cell lineage commitment                                                 | GO:0002360 | 3.18E-01 | 4.13E-01 | Ly9,17085:up                                                                                                                                                                                                                                                                                                                                                                                                                                                                                                                                                                                                                                                                                                                                                                                                                                                                                                                                                                 |
| notochord development                                                     | GO:0030903 | 3.18E-01 | 4.13E-01 | Wnt5a,22418:down                                                                                                                                                                                                                                                                                                                                                                                                                                                                                                                                                                                                                                                                                                                                                                                                                                                                                                                                                             |
| regulation of long-term synaptic potentiation                             | GO:1900271 | 3.18E-01 | 4.13E-01 | Cx3cr1,13051:down                                                                                                                                                                                                                                                                                                                                                                                                                                                                                                                                                                                                                                                                                                                                                                                                                                                                                                                                                            |
| regulatory T cell differentiation                                         | GO:0045066 | 3.18E-01 | 4.13E-01 | Ctla2a,13024:down                                                                                                                                                                                                                                                                                                                                                                                                                                                                                                                                                                                                                                                                                                                                                                                                                                                                                                                                                            |
| mammary gland lobule development                                          | GO:0061377 | 3.18E-01 | 4.13E-01 | Vegfa,22339:down                                                                                                                                                                                                                                                                                                                                                                                                                                                                                                                                                                                                                                                                                                                                                                                                                                                                                                                                                             |
| response to antibiotic                                                    | GO:0046677 | 3.18E-01 | 4.13E-01 | Alpl,11647:up                                                                                                                                                                                                                                                                                                                                                                                                                                                                                                                                                                                                                                                                                                                                                                                                                                                                                                                                                                |
| regulation of establishment or maintenance of cell polarity               | GO:0032878 | 3.18E-01 | 4.13E-01 | Igf1,16000:up                                                                                                                                                                                                                                                                                                                                                                                                                                                                                                                                                                                                                                                                                                                                                                                                                                                                                                                                                                |
| epithelial cell proliferation involved in liver morphogenesis             | GO:0072575 | 3.18E-01 | 4.13E-01 | Ceacam1,26365:up                                                                                                                                                                                                                                                                                                                                                                                                                                                                                                                                                                                                                                                                                                                                                                                                                                                                                                                                                             |
| hepatocyte proliferation                                                  | GO:0072574 | 3.18E-01 | 4.13E-01 | Ceacam1,26365:up                                                                                                                                                                                                                                                                                                                                                                                                                                                                                                                                                                                                                                                                                                                                                                                                                                                                                                                                                             |
| respiratory burst                                                         | GO:0045730 | 3.18E-01 | 4.13E-01 | Cd24a,12484:down                                                                                                                                                                                                                                                                                                                                                                                                                                                                                                                                                                                                                                                                                                                                                                                                                                                                                                                                                             |
| positive regulation of cellular response to insulin stimulus              | GO:1900078 | 3.18E-01 | 4.13E-01 | Igf2,16002:up                                                                                                                                                                                                                                                                                                                                                                                                                                                                                                                                                                                                                                                                                                                                                                                                                                                                                                                                                                |
| positive regulation of protein deacetylation                              | GO:0090312 | 3.18E-01 | 4.13E-01 | Vegfa,22339:down                                                                                                                                                                                                                                                                                                                                                                                                                                                                                                                                                                                                                                                                                                                                                                                                                                                                                                                                                             |
| tongue development                                                        | GO:0043586 | 3.18E-01 | 4.13E-01 | Bnc2,242509:down                                                                                                                                                                                                                                                                                                                                                                                                                                                                                                                                                                                                                                                                                                                                                                                                                                                                                                                                                             |
| tyrosine phosphorylation of Stat5 protein                                 | GO:0042506 | 3.18E-01 | 4.13E-01 | Igf1,16000:up                                                                                                                                                                                                                                                                                                                                                                                                                                                                                                                                                                                                                                                                                                                                                                                                                                                                                                                                                                |
| regulation of interleukin-17 production                                   | GO:0032660 | 3.18E-01 | 4.13E-01 | Ly9,17085:up                                                                                                                                                                                                                                                                                                                                                                                                                                                                                                                                                                                                                                                                                                                                                                                                                                                                                                                                                                 |
| defense response to fungus                                                | GO:0050832 | 3.18E-01 | 4.13E-01 | Clec4n,56620:up                                                                                                                                                                                                                                                                                                                                                                                                                                                                                                                                                                                                                                                                                                                                                                                                                                                                                                                                                              |
| regulation of glutamate secretion                                         | GO:0014048 | 3.18E-01 | 4.13E-01 | Il1rn,16181:up                                                                                                                                                                                                                                                                                                                                                                                                                                                                                                                                                                                                                                                                                                                                                                                                                                                                                                                                                               |
| protein targeting to plasma membrane                                      | GO:0072661 | 3.18E-01 | 4.13E-01 | Gas6,14456:up                                                                                                                                                                                                                                                                                                                                                                                                                                                                                                                                                                                                                                                                                                                                                                                                                                                                                                                                                                |

|                                                                                        |            |          |          |                                                                                                                                                                                                                                                                                                                                                                                                                                                                                                                                                                                                                                                                                                                                                                                                                                                |
|----------------------------------------------------------------------------------------|------------|----------|----------|------------------------------------------------------------------------------------------------------------------------------------------------------------------------------------------------------------------------------------------------------------------------------------------------------------------------------------------------------------------------------------------------------------------------------------------------------------------------------------------------------------------------------------------------------------------------------------------------------------------------------------------------------------------------------------------------------------------------------------------------------------------------------------------------------------------------------------------------|
| regulation of histone deacetylation                                                    | GO:0031063 | 3.18E-01 | 4.13E-01 | Vegfa,22339:down                                                                                                                                                                                                                                                                                                                                                                                                                                                                                                                                                                                                                                                                                                                                                                                                                               |
| positive regulation of muscle cell apoptotic process                                   | GO:0010661 | 3.18E-01 | 4.13E-01 | Igfbp3,16009:up                                                                                                                                                                                                                                                                                                                                                                                                                                                                                                                                                                                                                                                                                                                                                                                                                                |
| negative regulation of intrinsic apoptotic signaling pathway in response to DNA damage | GO:1902230 | 3.18E-01 | 4.13E-01 | Cxcl12,20315:up                                                                                                                                                                                                                                                                                                                                                                                                                                                                                                                                                                                                                                                                                                                                                                                                                                |
| mammary gland alveolus development                                                     | GO:0060749 | 3.18E-01 | 4.13E-01 | Vegfa,22339:down                                                                                                                                                                                                                                                                                                                                                                                                                                                                                                                                                                                                                                                                                                                                                                                                                               |
| astrocyte development                                                                  | GO:0014002 | 3.18E-01 | 4.13E-01 | Egfr,13649:down                                                                                                                                                                                                                                                                                                                                                                                                                                                                                                                                                                                                                                                                                                                                                                                                                                |
| triglyceride catabolic process                                                         | GO:0019433 | 3.18E-01 | 4.13E-01 | Lpl,16956:up                                                                                                                                                                                                                                                                                                                                                                                                                                                                                                                                                                                                                                                                                                                                                                                                                                   |
| response to superoxide                                                                 | GO:0000303 | 3.18E-01 | 4.13E-01 | Tnf,21926:up                                                                                                                                                                                                                                                                                                                                                                                                                                                                                                                                                                                                                                                                                                                                                                                                                                   |
| pyrimidine nucleotide biosynthetic process                                             | GO:0006221 | 3.18E-01 | 4.13E-01 | Uck2,80914:down                                                                                                                                                                                                                                                                                                                                                                                                                                                                                                                                                                                                                                                                                                                                                                                                                                |
| secondary metabolite biosynthetic process                                              | GO:0044550 | 3.18E-01 | 4.13E-01 | Wnt5a,22418:down                                                                                                                                                                                                                                                                                                                                                                                                                                                                                                                                                                                                                                                                                                                                                                                                                               |
| C21-steroid hormone metabolic process                                                  | GO:0008207 | 3.18E-01 | 4.13E-01 | Akr1c18,105349:up                                                                                                                                                                                                                                                                                                                                                                                                                                                                                                                                                                                                                                                                                                                                                                                                                              |
| regulation of cellular component biogenesis                                            | GO:0044087 | 3.21E-01 | 4.17E-01 | Tnf,21926:up Prl2c2,18811:up Ice1,218333:down Plk2,20620:down Flrt2,399558:down Cd24a,12484:down Ncam1,17967:down Wnt5a,22418:down Dpysl3,22240:down Grem1,23892:up Srxp2,68792:down Gpm6b,14758:up Vegfa,22339:down Thbs2,21826:down                                                                                                                                                                                                                                                                                                                                                                                                                                                                                                                                                                                                          |
| integrin-mediated signaling pathway                                                    | GO:0007229 | 3.22E-01 | 4.18E-01 | Sema7a,20361:down Col3a1,12825:down                                                                                                                                                                                                                                                                                                                                                                                                                                                                                                                                                                                                                                                                                                                                                                                                            |
| regulation of neurotransmitter transport                                               | GO:0051588 | 3.22E-01 | 4.18E-01 | Gpm6b,14758:up Sncg,20618:up                                                                                                                                                                                                                                                                                                                                                                                                                                                                                                                                                                                                                                                                                                                                                                                                                   |
| negative regulation of protein localization to nucleus                                 | GO:1900181 | 3.22E-01 | 4.18E-01 | Gas6,14456:up C1qtnf3,81799:down                                                                                                                                                                                                                                                                                                                                                                                                                                                                                                                                                                                                                                                                                                                                                                                                               |
| sperm motility                                                                         | GO:0030317 | 3.22E-01 | 4.18E-01 | Sord,20322:up Ceacam10,26366:up                                                                                                                                                                                                                                                                                                                                                                                                                                                                                                                                                                                                                                                                                                                                                                                                                |
| cellular component disassembly                                                         | GO:0022411 | 3.24E-01 | 4.20E-01 | Tnf,21926:up Lmcd1,30937:up Cd24a,12484:down Sfrp4,20379:up Mmp13,17386:up Plod2,26432:down Tgfb2,21808:down Igfbp3,16009:up                                                                                                                                                                                                                                                                                                                                                                                                                                                                                                                                                                                                                                                                                                                   |
| regulation of neurotransmitter levels                                                  | GO:0001505 | 3.24E-01 | 4.20E-01 | Gpm6b,14758:up Sytn11,80976:up Sncg,20618:up Maob,109731:up                                                                                                                                                                                                                                                                                                                                                                                                                                                                                                                                                                                                                                                                                                                                                                                    |
| purine nucleoside monophosphate biosynthetic process                                   | GO:0009127 | 3.25E-01 | 4.21E-01 | Htr2a,15558:down Ampd3,11717:up Igf1,16000:up                                                                                                                                                                                                                                                                                                                                                                                                                                                                                                                                                                                                                                                                                                                                                                                                  |
| purine ribonucleoside monophosphate biosynthetic process                               | GO:0009168 | 3.25E-01 | 4.21E-01 | Htr2a,15558:down Ampd3,11717:up Igf1,16000:up                                                                                                                                                                                                                                                                                                                                                                                                                                                                                                                                                                                                                                                                                                                                                                                                  |
| protein heterooligomerization                                                          | GO:0051291 | 3.25E-01 | 4.21E-01 | Col1a2,12843:down C1qtnf6,72709:down Adipoq,11450:up                                                                                                                                                                                                                                                                                                                                                                                                                                                                                                                                                                                                                                                                                                                                                                                           |
| RNA biosynthetic process                                                               | GO:0032774 | 3.27E-01 | 4.23E-01 | Fstl3,83554:down Ice1,218333:down Tfec,21426:up Sfrp4,20379:up Ednrb,13618:up Epas1,13819:up Ankrd1,107765:down Htra3,78558:down Uchl5,56207:up Lyl1,17095:up Sdpr,20324:down Loxl2,94352:down Loxl3,16950:down Trf,22041:up Wnt5a,22418:down Bmpr1a,12166:down Ccl4,20303:up Adipoq,11450:up Bmp4,12159:up Igf1,16000:up Ret,19713:up Ppp3,67916:up Creb3l1,26427:down Fgfr2,14183:up Prl2c2,18811:up Efemp1,216616:up Inhba,16323:down Ras11a,68895:up Bnc2,242509:down Ccl3,20302:up Vdr,22337:down Fabp4,11770:up Vegfa,22339:down Igf2,16002:up Slc40a1,53945:up Pparg,19016:up Gas6,14456:up Tnf,21926:up Glp1r,14652:down Lmcd1,30937:up Fgfr1,14182:down Egfr,13649:down Hmox1,15368:up Sfrp1,20377:up Sulf1,240725:down Tgfb3,21814:up Grem1,23892:up Phf11d,219132:up Sfrp2,20319:up Tbx15,21384:down Npnt,114249:up S100a1,20193:up |
| CD4-positive, alpha-beta T cell activation                                             | GO:0035710 | 3.29E-01 | 4.25E-01 | Ceacam1,26365:up Ly9,17085:up                                                                                                                                                                                                                                                                                                                                                                                                                                                                                                                                                                                                                                                                                                                                                                                                                  |
| myeloid cell activation involved in immune response                                    | GO:0002275 | 3.29E-01 | 4.25E-01 | Hmox1,15368:up Cx3cr1,13051:down                                                                                                                                                                                                                                                                                                                                                                                                                                                                                                                                                                                                                                                                                                                                                                                                               |
| synaptic vesicle transport                                                             | GO:0048489 | 3.30E-01 | 4.25E-01 | Cd24a,12484:down Sytn11,80976:up Fgfr2,14183:up                                                                                                                                                                                                                                                                                                                                                                                                                                                                                                                                                                                                                                                                                                                                                                                                |
| establishment of synaptic vesicle localization                                         | GO:0097480 | 3.30E-01 | 4.25E-01 | Cd24a,12484:down Sytn11,80976:up Fgfr2,14183:up                                                                                                                                                                                                                                                                                                                                                                                                                                                                                                                                                                                                                                                                                                                                                                                                |
| positive regulation of heart rate                                                      | GO:0010460 | 3.31E-01 | 4.25E-01 | Adm,11535:up                                                                                                                                                                                                                                                                                                                                                                                                                                                                                                                                                                                                                                                                                                                                                                                                                                   |
| secretory granule organization                                                         | GO:0033363 | 3.31E-01 | 4.25E-01 | Serpine2,20720:up                                                                                                                                                                                                                                                                                                                                                                                                                                                                                                                                                                                                                                                                                                                                                                                                                              |
| negative regulation of response to reactive oxygen species                             | GO:1901032 | 3.31E-01 | 4.25E-01 | Hp,15439:up                                                                                                                                                                                                                                                                                                                                                                                                                                                                                                                                                                                                                                                                                                                                                                                                                                    |
| negative regulation of T cell apoptotic process                                        | GO:0070233 | 3.31E-01 | 4.25E-01 | Bmp4,12159:up                                                                                                                                                                                                                                                                                                                                                                                                                                                                                                                                                                                                                                                                                                                                                                                                                                  |
| negative regulation of protein dephosphorylation                                       | GO:0035308 | 3.31E-01 | 4.25E-01 | Tnf,21926:up                                                                                                                                                                                                                                                                                                                                                                                                                                                                                                                                                                                                                                                                                                                                                                                                                                   |

|                                                                     |            |          |          |                                                                                                                                                                                                                                                                                                                                                                                                    |
|---------------------------------------------------------------------|------------|----------|----------|----------------------------------------------------------------------------------------------------------------------------------------------------------------------------------------------------------------------------------------------------------------------------------------------------------------------------------------------------------------------------------------------------|
| regulation of cellular senescence                                   | GO:2000772 | 3.31E-01 | 4.25E-01 | Bmpr1a,12166:down                                                                                                                                                                                                                                                                                                                                                                                  |
| regulation of activin receptor signaling pathway                    | GO:0032925 | 3.31E-01 | 4.25E-01 | Fstl3,83554:down                                                                                                                                                                                                                                                                                                                                                                                   |
| regulation of voltage-gated calcium channel activity                | GO:1901385 | 3.31E-01 | 4.25E-01 | S100a1,20193:up                                                                                                                                                                                                                                                                                                                                                                                    |
| microvillus organization                                            | GO:0032528 | 3.31E-01 | 4.25E-01 | Pr12c2,18811:up                                                                                                                                                                                                                                                                                                                                                                                    |
| negative regulation of cardiac muscle cell apoptotic process        | GO:0010667 | 3.31E-01 | 4.25E-01 | Sfrp2,20319:up                                                                                                                                                                                                                                                                                                                                                                                     |
| cellular response to epidermal growth factor stimulus               | GO:0071364 | 3.31E-01 | 4.25E-01 | Egfr,13649:down                                                                                                                                                                                                                                                                                                                                                                                    |
| uterus development                                                  | GO:0060065 | 3.31E-01 | 4.25E-01 | Wnt5a,22418:down                                                                                                                                                                                                                                                                                                                                                                                   |
| response to dietary excess                                          | GO:0002021 | 3.31E-01 | 4.25E-01 | Pparg,19016:up                                                                                                                                                                                                                                                                                                                                                                                     |
| vascular smooth muscle cell differentiation                         | GO:0035886 | 3.31E-01 | 4.25E-01 | Adm,11535:up                                                                                                                                                                                                                                                                                                                                                                                       |
| cellular detoxification                                             | GO:1990748 | 3.31E-01 | 4.25E-01 | Tnf,21926:up                                                                                                                                                                                                                                                                                                                                                                                       |
| positive regulation of DNA recombination                            | GO:0045911 | 3.31E-01 | 4.25E-01 | Tfrc,22042:up                                                                                                                                                                                                                                                                                                                                                                                      |
| regulation of T-helper 1 type immune response                       | GO:0002825 | 3.31E-01 | 4.25E-01 | Il1rl1,17082:down                                                                                                                                                                                                                                                                                                                                                                                  |
| response to oxygen radical                                          | GO:0000305 | 3.31E-01 | 4.25E-01 | Tnf,21926:up                                                                                                                                                                                                                                                                                                                                                                                       |
| neurotransmitter uptake                                             | GO:0001504 | 3.31E-01 | 4.25E-01 | Gpm6b,14758:up                                                                                                                                                                                                                                                                                                                                                                                     |
| middle ear morphogenesis                                            | GO:0042474 | 3.31E-01 | 4.25E-01 | Fgfr1,14182:down                                                                                                                                                                                                                                                                                                                                                                                   |
| protein kinase A signaling                                          | GO:0010737 | 3.31E-01 | 4.25E-01 | Adipoq,11450:up                                                                                                                                                                                                                                                                                                                                                                                    |
| negative regulation of calcium ion transmembrane transport          | GO:1903170 | 3.31E-01 | 4.25E-01 | Tgfb2,21808:down                                                                                                                                                                                                                                                                                                                                                                                   |
| nuclear DNA replication                                             | GO:0033260 | 3.31E-01 | 4.25E-01 | Fgfr1,14182:down                                                                                                                                                                                                                                                                                                                                                                                   |
| nucleotide biosynthetic process                                     | GO:0009165 | 3.32E-01 | 4.26E-01 | Htr2b,15559:down Adm,11535:up Htr2a,15558:down Ptgir,19222:up Uck2,80914:down Ampd3,11717:up Igf1,16000:up                                                                                                                                                                                                                                                                                         |
| cofactor metabolic process                                          | GO:0051186 | 3.32E-01 | 4.26E-01 | Akr1c18,105349:up Hmox1,15368:up Htr2a,15558:down Pdxk,216134:up Blvrb,233016:up Cbr2,12409:up Igf1,16000:up                                                                                                                                                                                                                                                                                       |
| negative regulation of nitrogen compound metabolic process          | GO:0051172 | 3.34E-01 | 4.28E-01 | Sfrp4,20379:up Ednrb,13618:up Epas1,13819:up Ankrd1,107765:down Vdr,22337:down Fabp4,11770:up Vegfa,22339:down Gas6,14456:up Pparg,19016:up Tnf,21926:up Loxl2,94352:down Loxl3,16950:down Lmcd1,30937:up Fgfr1,14182:down Egfr,13649:down Hmox1,15368:up Sfrp1,20377:up Wnt5a,22418:down Ccl4,20303:up Grem1,23892:up Adipoq,11450:up Bmp4,12159:up Sfrp2,20319:up Fgfr2,14183:up S100a1,20193:up |
| activation of mitophagy in response to mitochondrial depolarization | GO:0098779 | 3.35E-01 | 4.30E-01 | Lmcd1,30937:up Plod2,26432:down Sfrp4,20379:up                                                                                                                                                                                                                                                                                                                                                     |
| response to mitochondrial depolarisation                            | GO:0098780 | 3.35E-01 | 4.30E-01 | Lmcd1,30937:up Plod2,26432:down Sfrp4,20379:up                                                                                                                                                                                                                                                                                                                                                     |
| response to ionizing radiation                                      | GO:0010212 | 3.35E-01 | 4.30E-01 | Sfrp2,20319:up Sfrp1,20377:up Nabp1,109019:down                                                                                                                                                                                                                                                                                                                                                    |
| response to organophosphorus                                        | GO:0046683 | 3.36E-01 | 4.30E-01 | Cdo1,12583:up Adipoq,11450:up                                                                                                                                                                                                                                                                                                                                                                      |
| positive regulation of cAMP metabolic process                       | GO:0030816 | 3.36E-01 | 4.30E-01 | Adm,11535:up Ptgir,19222:up                                                                                                                                                                                                                                                                                                                                                                        |
| regulation of cellular response to oxidative stress                 | GO:1900407 | 3.36E-01 | 4.30E-01 | Tnf,21926:up Hp,15439:up                                                                                                                                                                                                                                                                                                                                                                           |
| nucleoside phosphate biosynthetic process                           | GO:1901293 | 3.38E-01 | 4.33E-01 | Htr2b,15559:down Adm,11535:up Htr2a,15558:down Ptgir,19222:up Uck2,80914:down Ampd3,11717:up Igf1,16000:up                                                                                                                                                                                                                                                                                         |
| organic anion transport                                             | GO:0015711 | 3.38E-01 | 4.33E-01 | Tnf,21926:up Pparg,19016:up Fam132b,227358:down Emb,13723:up Il1rn,16181:up Slc16a4,229699:down Serinc2,230779:down                                                                                                                                                                                                                                                                                |
| purine-containing compound biosynthetic process                     | GO:0072522 | 3.40E-01 | 4.36E-01 | Htr2b,15559:down Adm,11535:up Htr2a,15558:down Ptgir,19222:up Ampd3,11717:up Igf1,16000:up                                                                                                                                                                                                                                                                                                         |

|                                                                                                                         |            |          |          |                                                                                                                                                                                                                                                                                                                                                                                                                                                     |
|-------------------------------------------------------------------------------------------------------------------------|------------|----------|----------|-----------------------------------------------------------------------------------------------------------------------------------------------------------------------------------------------------------------------------------------------------------------------------------------------------------------------------------------------------------------------------------------------------------------------------------------------------|
| cellular process involved in reproduction in multicellular organism                                                     | GO:0022412 | 3.40E-01 | 4.36E-01 | Sfrp1,20377:up Cxcl12,20315:up Inhba,16323:down Kitl,17311:up Igf1,16000:up Bmp4,12159:up                                                                                                                                                                                                                                                                                                                                                           |
| organic substance catabolic process                                                                                     | GO:1901575 | 3.41E-01 | 4.36E-01 | Mmp13,17386:up Enpp5,83965:up Uchl5,56207:up Sord,20322:up Ddah1,69219:down Htr2a,15558:down Blvrb,233016:up Npl,74091:up Serpine2,20720:up Igf3,16009:up Adamts12,239337:down Enpp3,20958:down Cdo1,12583:up Anpep,16790:up Tnf,21926:up Plk2,20620:down Akr1c18,105349:up Egfr,13649:down Hmox1,15368:up Lpl,16956:up Wnt5a,22418:down Adipoq,11450:up Hal,15109:up Igf1,16000:up Ceacam1,26365:up Hpse,15442:up Sdf2l1,64136:up Enpp1,18605:down |
| negative regulation of phosphatase activity                                                                             | GO:0010923 | 3.42E-01 | 4.36E-01 | Tnf,21926:up Tgfb2,21808:down                                                                                                                                                                                                                                                                                                                                                                                                                       |
| fatty acid transport                                                                                                    | GO:0015908 | 3.42E-01 | 4.36E-01 | Pparg,19016:up Fam132b,227358:down                                                                                                                                                                                                                                                                                                                                                                                                                  |
| liver morphogenesis                                                                                                     | GO:0072576 | 3.43E-01 | 4.36E-01 | Ceacam1,26365:up                                                                                                                                                                                                                                                                                                                                                                                                                                    |
| B cell apoptotic process                                                                                                | GO:0017783 | 3.43E-01 | 4.36E-01 | Cd24a,12484:down                                                                                                                                                                                                                                                                                                                                                                                                                                    |
| prostaglandin biosynthetic process                                                                                      | GO:001516  | 3.43E-01 | 4.36E-01 | Ptgs2,19225:down                                                                                                                                                                                                                                                                                                                                                                                                                                    |
| protein kinase C-activating G-protein coupled receptor signaling pathway                                                | GO:0007205 | 3.43E-01 | 4.36E-01 | Htr2b,15559:down                                                                                                                                                                                                                                                                                                                                                                                                                                    |
| prostanoid biosynthetic process                                                                                         | GO:0046457 | 3.43E-01 | 4.36E-01 | Ptgs2,19225:down                                                                                                                                                                                                                                                                                                                                                                                                                                    |
| positive regulation of transcription from RNA polymerase II promoter involved in cellular response to chemical stimulus | GO:1901522 | 3.43E-01 | 4.36E-01 | Vegfa,22339:down                                                                                                                                                                                                                                                                                                                                                                                                                                    |
| lymph vessel development                                                                                                | GO:001945  | 3.43E-01 | 4.36E-01 | Vegfa,22339:down                                                                                                                                                                                                                                                                                                                                                                                                                                    |
| positive regulation of neurological system process                                                                      | GO:0031646 | 3.43E-01 | 4.36E-01 | Trf,22041:up                                                                                                                                                                                                                                                                                                                                                                                                                                        |
| glomerulus vasculature development                                                                                      | GO:0072012 | 3.43E-01 | 4.36E-01 | Bmp4,12159:up                                                                                                                                                                                                                                                                                                                                                                                                                                       |
| positive regulation of blood coagulation                                                                                | GO:0030194 | 3.43E-01 | 4.36E-01 | Hpse,15442:up                                                                                                                                                                                                                                                                                                                                                                                                                                       |
| positive regulation of hemostasis                                                                                       | GO:1900048 | 3.43E-01 | 4.36E-01 | Hpse,15442:up                                                                                                                                                                                                                                                                                                                                                                                                                                       |
| cellular response to mechanical stimulus                                                                                | GO:0071260 | 3.43E-01 | 4.36E-01 | Ankrd1,107765:down                                                                                                                                                                                                                                                                                                                                                                                                                                  |
| maternal placenta development                                                                                           | GO:001893  | 3.43E-01 | 4.36E-01 | Ptgs2,19225:down                                                                                                                                                                                                                                                                                                                                                                                                                                    |
| fluid transport                                                                                                         | GO:0042044 | 3.43E-01 | 4.36E-01 | Ednrb,13618:up                                                                                                                                                                                                                                                                                                                                                                                                                                      |
| lens morphogenesis in camera-type eye                                                                                   | GO:0002089 | 3.43E-01 | 4.36E-01 | Bmp4,12159:up                                                                                                                                                                                                                                                                                                                                                                                                                                       |
| regulation of gene silencing by miRNA                                                                                   | GO:0060964 | 3.43E-01 | 4.36E-01 | Egfr,13649:down                                                                                                                                                                                                                                                                                                                                                                                                                                     |
| renal system process involved in regulation of systemic arterial blood pressure                                         | GO:0003071 | 3.43E-01 | 4.36E-01 | Gas6,14456:up                                                                                                                                                                                                                                                                                                                                                                                                                                       |
| T cell costimulation                                                                                                    | GO:0031295 | 3.43E-01 | 4.36E-01 | Cd24a,12484:down                                                                                                                                                                                                                                                                                                                                                                                                                                    |
| positive regulation of peptidyl-threonine phosphorylation                                                               | GO:0010800 | 3.43E-01 | 4.36E-01 | Wnt5a,22418:down                                                                                                                                                                                                                                                                                                                                                                                                                                    |
| DNA catabolic process                                                                                                   | GO:0006308 | 3.43E-01 | 4.36E-01 | Igf3,16009:up                                                                                                                                                                                                                                                                                                                                                                                                                                       |
| acidic amino acid transport                                                                                             | GO:0015800 | 3.43E-01 | 4.36E-01 | Tnf,21926:up                                                                                                                                                                                                                                                                                                                                                                                                                                        |
| glutamine metabolic process                                                                                             | GO:0006541 | 3.43E-01 | 4.36E-01 | Gfpt2,14584:down                                                                                                                                                                                                                                                                                                                                                                                                                                    |
| beta-amyloid metabolic process                                                                                          | GO:0050435 | 3.43E-01 | 4.36E-01 | Mme,17380:up                                                                                                                                                                                                                                                                                                                                                                                                                                        |
| centriole replication                                                                                                   | GO:0007099 | 3.43E-01 | 4.36E-01 | Plk2,20620:down                                                                                                                                                                                                                                                                                                                                                                                                                                     |
| metanephric epithelium development                                                                                      | GO:0072207 | 3.43E-01 | 4.36E-01 | Adipoq,11450:up                                                                                                                                                                                                                                                                                                                                                                                                                                     |
| negative regulation of endothelial cell apoptotic process                                                               | GO:2000352 | 3.43E-01 | 4.36E-01 | Gas6,14456:up                                                                                                                                                                                                                                                                                                                                                                                                                                       |
| positive regulation of mitochondrion degradation                                                                        | GO:1903599 | 3.45E-01 | 4.38E-01 | Lmcd1,30937:up Plod2,26432:down Sfrp4,20379:up                                                                                                                                                                                                                                                                                                                                                                                                      |



|                                                                           |            |          |          |                                                                      |
|---------------------------------------------------------------------------|------------|----------|----------|----------------------------------------------------------------------|
| cellular amine metabolic process                                          | GO:0044106 | 3.45E-01 | 4.38E-01 | Fabp5,16592:up Maob,109731:up Epas1,13819:up                         |
| positive regulation of ion transmembrane transporter activity             | GO:0032414 | 3.49E-01 | 4.43E-01 | S100a1,20193:up Bmp4,12159:up                                        |
| adenylate cyclase-activating G-protein coupled receptor signaling pathway | GO:0007189 | 3.49E-01 | 4.43E-01 | Glp1r,14652:down Ptgir,19222:up                                      |
| nicotinamide nucleotide metabolic process                                 | GO:0046496 | 3.50E-01 | 4.44E-01 | Htr2a,15558:down Cbr2,12409:up lgf1,16000:up                         |
| striated muscle contraction                                               | GO:0006941 | 3.50E-01 | 4.44E-01 | Fxyd1,56188:up Vegfb,22340:up Stc1,20855:up                          |
| alpha-beta T cell activation                                              | GO:0046631 | 3.50E-01 | 4.44E-01 | Ceacam1,26365:up Cd24a,12484:down Ly9,17085:up                       |
| determination of bilateral symmetry                                       | GO:0009855 | 3.50E-01 | 4.44E-01 | Wnt5a,22418:down Aldh1a2,19378:up Grem1,23892:up                     |
| glycerophospholipid metabolic process                                     | GO:0006650 | 3.53E-01 | 4.47E-01 | Htr2b,15559:down Fabp5,16592:up Htr2a,15558:down Serinc2,230779:down |
| negative regulation of smoothened signaling pathway                       | GO:0045879 | 3.55E-01 | 4.47E-01 | Serpine2,20720:up                                                    |
| kidney vasculature development                                            | GO:0061440 | 3.55E-01 | 4.47E-01 | Bmp4,12159:up                                                        |
| maintenance of protein localization in organelle                          | GO:0072595 | 3.55E-01 | 4.47E-01 | Kdelr3,105785:down                                                   |
| growth of symbiont involved in interaction with host                      | GO:0044116 | 3.55E-01 | 4.47E-01 | Tnf,21926:up                                                         |
| positive regulation of CD4-positive, alpha-beta T cell activation         | GO:2000516 | 3.55E-01 | 4.47E-01 | Ceacam1,26365:up                                                     |
| superoxide anion generation                                               | GO:0042554 | 3.55E-01 | 4.47E-01 | Egfr,13649:down                                                      |
| centriole assembly                                                        | GO:0098534 | 3.55E-01 | 4.47E-01 | Plk2,20620:down                                                      |
| neuron recognition                                                        | GO:0008038 | 3.55E-01 | 4.47E-01 | Wnt5a,22418:down                                                     |
| negative regulation of muscle contraction                                 | GO:0045932 | 3.55E-01 | 4.47E-01 | Ptgs2,19225:down                                                     |
| growth of symbiont in host                                                | GO:0044117 | 3.55E-01 | 4.47E-01 | Tnf,21926:up                                                         |
| negative regulation of macroautophagy                                     | GO:0016242 | 3.55E-01 | 4.47E-01 | Hmox1,15368:up                                                       |
| lymphocyte costimulation                                                  | GO:0031294 | 3.55E-01 | 4.47E-01 | Cd24a,12484:down                                                     |
| growth involved in symbiotic interaction                                  | GO:0044110 | 3.55E-01 | 4.47E-01 | Tnf,21926:up                                                         |
| positive regulation of natural killer cell activation                     | GO:0032816 | 3.55E-01 | 4.47E-01 | Gas6,14456:up                                                        |
| epiboly involved in wound healing                                         | GO:0090505 | 3.55E-01 | 4.47E-01 | Col5a1,12831:down                                                    |
| negative regulation of striated muscle cell apoptotic process             | GO:0010664 | 3.55E-01 | 4.47E-01 | Sfrp2,20319:up                                                       |
| wound healing, spreading of cells                                         | GO:0044319 | 3.55E-01 | 4.47E-01 | Col5a1,12831:down                                                    |
| renal system vasculature development                                      | GO:0061437 | 3.55E-01 | 4.47E-01 | Bmp4,12159:up                                                        |
| positive regulation of myeloid leukocyte mediated immunity                | GO:0002888 | 3.55E-01 | 4.47E-01 | C3,12266:up                                                          |
| potassium ion import                                                      | GO:0010107 | 3.55E-01 | 4.47E-01 | Kcnj15,16516:down                                                    |
| negative regulation of axon extension involved in axon guidance           | GO:0048843 | 3.55E-01 | 4.47E-01 | Wnt5a,22418:down                                                     |
| regulation of execution phase of apoptosis                                | GO:1900117 | 3.55E-01 | 4.47E-01 | Igfbp3,16009:up                                                      |
| pyrimidine nucleoside metabolic process                                   | GO:0006213 | 3.55E-01 | 4.47E-01 | Uck2,80914:down                                                      |
| negative regulation of response to biotic stimulus                        | GO:0002832 | 3.55E-01 | 4.47E-01 | Ceacam1,26365:up                                                     |

|                                                                             |            |          |          |                                                                                                                                                                                                                                                                                                                                                                                                                                                                                                                                                                                                                                                                                                                                                                                                                                                                                                                                                                                                |
|-----------------------------------------------------------------------------|------------|----------|----------|------------------------------------------------------------------------------------------------------------------------------------------------------------------------------------------------------------------------------------------------------------------------------------------------------------------------------------------------------------------------------------------------------------------------------------------------------------------------------------------------------------------------------------------------------------------------------------------------------------------------------------------------------------------------------------------------------------------------------------------------------------------------------------------------------------------------------------------------------------------------------------------------------------------------------------------------------------------------------------------------|
| macromitophagy                                                              | GO:000423  | 3.55E-01 | 4.47E-01 | Lmcd1,30937:up Plod2,26432:down Sfrp4,20379:up                                                                                                                                                                                                                                                                                                                                                                                                                                                                                                                                                                                                                                                                                                                                                                                                                                                                                                                                                 |
| positive regulation of JAK-STAT cascade                                     | GO:0046427 | 3.55E-01 | 4.48E-01 | Crfl1,12931:down Igf1,16000:up                                                                                                                                                                                                                                                                                                                                                                                                                                                                                                                                                                                                                                                                                                                                                                                                                                                                                                                                                                 |
| cellular amino acid biosynthetic process                                    | GO:0008652 | 3.55E-01 | 4.48E-01 | Gatm,67092:down Cdo1,12583:up                                                                                                                                                                                                                                                                                                                                                                                                                                                                                                                                                                                                                                                                                                                                                                                                                                                                                                                                                                  |
| regulation of ion transmembrane transporter activity                        | GO:0032412 | 3.57E-01 | 4.50E-01 | Fxyd1,56188:up Fxyd2,11936:up S100a1,20193:up Bmp4,12159:up                                                                                                                                                                                                                                                                                                                                                                                                                                                                                                                                                                                                                                                                                                                                                                                                                                                                                                                                    |
| endocrine system development                                                | GO:0035270 | 3.60E-01 | 4.53E-01 | Wnt5a,22418:down Bmpr1a,12166:down Bmp4,12159:up                                                                                                                                                                                                                                                                                                                                                                                                                                                                                                                                                                                                                                                                                                                                                                                                                                                                                                                                               |
| mitochondrion degradation by induced vacuole formation                      | GO:0035695 | 3.60E-01 | 4.53E-01 | Lmcd1,30937:up Plod2,26432:down Sfrp4,20379:up                                                                                                                                                                                                                                                                                                                                                                                                                                                                                                                                                                                                                                                                                                                                                                                                                                                                                                                                                 |
| synaptic vesicle localization                                               | GO:0097479 | 3.60E-01 | 4.53E-01 | Cd24a,12484:down Sytn13,80976:up Fgfr2,14183:up                                                                                                                                                                                                                                                                                                                                                                                                                                                                                                                                                                                                                                                                                                                                                                                                                                                                                                                                                |
| negative regulation of binding                                              | GO:0051100 | 3.60E-01 | 4.53E-01 | Hmox1,15368:up Slpi,20568:up Adipoq,11450:up                                                                                                                                                                                                                                                                                                                                                                                                                                                                                                                                                                                                                                                                                                                                                                                                                                                                                                                                                   |
| pyridine nucleotide metabolic process                                       | GO:0019362 | 3.60E-01 | 4.53E-01 | Htr2a,15558:down Cbr2,12409:up Igf1,16000:up                                                                                                                                                                                                                                                                                                                                                                                                                                                                                                                                                                                                                                                                                                                                                                                                                                                                                                                                                   |
| cellular response to radiation                                              | GO:0071478 | 3.60E-01 | 4.53E-01 | Sfrp2,20319:up Sfrp1,20377:up Mme,17380:up                                                                                                                                                                                                                                                                                                                                                                                                                                                                                                                                                                                                                                                                                                                                                                                                                                                                                                                                                     |
| regulation of response to biotic stimulus                                   | GO:0002831 | 3.61E-01 | 4.54E-01 | Ceacam1,26365:up Lmcd1,30937:up Cd24a,12484:down Ifit1,15957:up                                                                                                                                                                                                                                                                                                                                                                                                                                                                                                                                                                                                                                                                                                                                                                                                                                                                                                                                |
| response to dsRNA                                                           | GO:0043331 | 3.62E-01 | 4.55E-01 | Egfr,13649:down Ifit1,15957:up                                                                                                                                                                                                                                                                                                                                                                                                                                                                                                                                                                                                                                                                                                                                                                                                                                                                                                                                                                 |
| protein localization                                                        | GO:0008104 | 3.64E-01 | 4.57E-01 | Ice1,218333:down Ccl2,20296:up Mmp13,17386:up Ankrd1,107765:down Gpm6b,14758:up Clec4n,56620:up Postn,50706:down Akr1c18,105349:up Cd24a,12484:down Wnt5a,22418:down Bmpr1a,12166:down Il1rn,16181:up Adipoq,11450:up Bmp4,12159:up Igf1,16000:up Tgfb2,21808:down Il1r1,17082:down Clec4e,56619:up Htr2b,15559:down Ccl3,20302:up Htr2a,15558:down Lrrc15,74488:down Kdelr3,105785:down Tnf,21926:up Pparg,19016:up Gas6,14456:up Glp1r,14652:down Egfr,13649:down Sfrp1,20377:up Lpl,16956:up Sec23a,20334:down C1qtnf3,81799:down Cd4,12504:up Tfrc,22042:up Ptgs2,19225:down Snca,20618:up Grem1,23892:up Ceacam1,26365:up Sfrp2,20319:up Npnt,114249:up                                                                                                                                                                                                                                                                                                                                   |
| smoothened signaling pathway                                                | GO:0007224 | 3.65E-01 | 4.58E-01 | Sfrp1,20377:up Serpine2,20720:up Fgfr2,14183:up                                                                                                                                                                                                                                                                                                                                                                                                                                                                                                                                                                                                                                                                                                                                                                                                                                                                                                                                                |
| organic cyclic compound biosynthetic process                                | GO:1901362 | 3.65E-01 | 4.58E-01 | Fstl3,83554:down Ice1,218333:down Adm,11535:up Tfec,21426:up Sfrp4,20379:up Ednrb,13618:up Ampd3,11717:up Epas1,13819:up Ankrd1,107765:down Htra3,78558:down Uchl5,56207:up Lyl1,17095:up Sdpr,20324:down Loxl2,94352:down Loxl3,16950:down Akr1c18,105349:up Trf,22041:up Wnt5a,22418:down Bmpr1a,12166:down Ccl4,20303:up Adipoq,11450:up Bmp4,12159:up Igf1,16000:up Ret,19713:up Tgfb2,21808:down Pdxk,216134:up Plpp3,67916:up Ptgir,19222:up Creb3l1,26427:down Fgfr2,14183:up Htr2b,15559:down Prl2c2,18811:up Efemp1,216616:up Inhba,16323:down Ras11a,68895:up Bnc2,242509:down Ccl3,20302:up Vdr,22337:down Fabp4,11770:up Vegfa,22339:down Htr2a,15558:down Igf2,16002:up Slc40a1,53945:up Pparg,19016:up Gas6,14456:up Tnf,21926:up Glp1r,14652:down Lmcd1,30937:up Fgfr1,14182:down Egfr,13649:down Hmox1,15368:up Sfrp1,20377:up Sulf1,240725:down Tgfb3,21814:up Grem1,23892:up Phf11d,219132:up Sfrp2,20319:up Tbx15,21384:down Npnt,114249:up Uck2,80914:down S100a1,20193:up |
| nucleobase-containing compound biosynthetic process                         | GO:0034654 | 3.65E-01 | 4.58E-01 | Fstl3,83554:down Ice1,218333:down Adm,11535:up Tfec,21426:up Sfrp4,20379:up Ednrb,13618:up Ampd3,11717:up Epas1,13819:up Ankrd1,107765:down Htra3,78558:down Uchl5,56207:up Lyl1,17095:up Sdpr,20324:down Loxl2,94352:down Loxl3,16950:down Trf,22041:up Wnt5a,22418:down Bmpr1a,12166:down Ccl4,20303:up Adipoq,11450:up Bmp4,12159:up Igf1,16000:up Ret,19713:up Plpp3,67916:up Ptgir,19222:up Creb3l1,26427:down Fgfr2,14183:up Htr2b,15559:down Prl2c2,18811:up Efemp1,216616:up Inhba,16323:down Ras11a,68895:up Bnc2,242509:down Ccl3,20302:up Vdr,22337:down Fabp4,11770:up Vegfa,22339:down Htr2a,15558:down Igf2,16002:up Slc40a1,53945:up Pparg,19016:up Gas6,14456:up Tnf,21926:up Glp1r,14652:down Lmcd1,30937:up Fgfr1,14182:down Egfr,13649:down Hmox1,15368:up Sfrp1,20377:up Sulf1,240725:down Tgfb3,21814:up Grem1,23892:up Phf11d,219132:up Sfrp2,20319:up Tbx15,21384:down Npnt,114249:up Uck2,80914:down S100a1,20193:up                                                   |
| steroid hormone secretion                                                   | GO:0035929 | 3.66E-01 | 4.58E-01 | Inhba,16323:down                                                                                                                                                                                                                                                                                                                                                                                                                                                                                                                                                                                                                                                                                                                                                                                                                                                                                                                                                                               |
| positive regulation of TOR signaling                                        | GO:0032008 | 3.66E-01 | 4.58E-01 | Gas6,14456:up                                                                                                                                                                                                                                                                                                                                                                                                                                                                                                                                                                                                                                                                                                                                                                                                                                                                                                                                                                                  |
| regulation of protein targeting to membrane                                 | GO:0090313 | 3.66E-01 | 4.58E-01 | Ccl2,20296:up                                                                                                                                                                                                                                                                                                                                                                                                                                                                                                                                                                                                                                                                                                                                                                                                                                                                                                                                                                                  |
| negative regulation of receptor activity                                    | GO:2000272 | 3.66E-01 | 4.58E-01 | Errfi1,74155:down                                                                                                                                                                                                                                                                                                                                                                                                                                                                                                                                                                                                                                                                                                                                                                                                                                                                                                                                                                              |
| negative regulation of axon guidance                                        | GO:1902668 | 3.66E-01 | 4.58E-01 | Wnt5a,22418:down                                                                                                                                                                                                                                                                                                                                                                                                                                                                                                                                                                                                                                                                                                                                                                                                                                                                                                                                                                               |
| regulation of viral entry into host cell                                    | GO:0046596 | 3.66E-01 | 4.58E-01 | Ptx3,19288:up                                                                                                                                                                                                                                                                                                                                                                                                                                                                                                                                                                                                                                                                                                                                                                                                                                                                                                                                                                                  |
| positive regulation of G-protein coupled receptor protein signaling pathway | GO:0045745 | 3.66E-01 | 4.58E-01 | C3,12266:up                                                                                                                                                                                                                                                                                                                                                                                                                                                                                                                                                                                                                                                                                                                                                                                                                                                                                                                                                                                    |
| response to epidermal growth factor                                         | GO:0070849 | 3.66E-01 | 4.58E-01 | Egfr,13649:down                                                                                                                                                                                                                                                                                                                                                                                                                                                                                                                                                                                                                                                                                                                                                                                                                                                                                                                                                                                |
| primary alcohol metabolic process                                           | GO:0034308 | 3.66E-01 | 4.58E-01 | Akr1c18,105349:up                                                                                                                                                                                                                                                                                                                                                                                                                                                                                                                                                                                                                                                                                                                                                                                                                                                                                                                                                                              |
| hyaluronan metabolic process                                                | GO:0030212 | 3.66E-01 | 4.58E-01 | Has2,15117:down                                                                                                                                                                                                                                                                                                                                                                                                                                                                                                                                                                                                                                                                                                                                                                                                                                                                                                                                                                                |

|                                                                                          |            |          |          |                                                                                                                                                                                                                                                                                                                                                                                                                                                                                                                                                                                                                                                                                                                                                                                                                                                                                                                                                             |
|------------------------------------------------------------------------------------------|------------|----------|----------|-------------------------------------------------------------------------------------------------------------------------------------------------------------------------------------------------------------------------------------------------------------------------------------------------------------------------------------------------------------------------------------------------------------------------------------------------------------------------------------------------------------------------------------------------------------------------------------------------------------------------------------------------------------------------------------------------------------------------------------------------------------------------------------------------------------------------------------------------------------------------------------------------------------------------------------------------------------|
| cellular response to alkaloid                                                            | GO:0071312 | 3.66E-01 | 4.58E-01 | Tnf,21926:up                                                                                                                                                                                                                                                                                                                                                                                                                                                                                                                                                                                                                                                                                                                                                                                                                                                                                                                                                |
| positive regulation of cell junction assembly                                            | GO:1901890 | 3.66E-01 | 4.58E-01 | Vegfa,22339:down                                                                                                                                                                                                                                                                                                                                                                                                                                                                                                                                                                                                                                                                                                                                                                                                                                                                                                                                            |
| cellular response to interleukin-4                                                       | GO:0071353 | 3.66E-01 | 4.58E-01 | Mrc1,17533:up                                                                                                                                                                                                                                                                                                                                                                                                                                                                                                                                                                                                                                                                                                                                                                                                                                                                                                                                               |
| neurotransmitter metabolic process                                                       | GO:0042133 | 3.66E-01 | 4.58E-01 | Maob,109731:up                                                                                                                                                                                                                                                                                                                                                                                                                                                                                                                                                                                                                                                                                                                                                                                                                                                                                                                                              |
| quinone metabolic process                                                                | GO:1901661 | 3.66E-01 | 4.58E-01 | Akr1c18,105349:up                                                                                                                                                                                                                                                                                                                                                                                                                                                                                                                                                                                                                                                                                                                                                                                                                                                                                                                                           |
| epiboly                                                                                  | GO:0090504 | 3.66E-01 | 4.58E-01 | Col5a1,12831:down                                                                                                                                                                                                                                                                                                                                                                                                                                                                                                                                                                                                                                                                                                                                                                                                                                                                                                                                           |
| regulation of p38MAPK cascade                                                            | GO:1900744 | 3.66E-01 | 4.58E-01 | Vegfa,22339:down                                                                                                                                                                                                                                                                                                                                                                                                                                                                                                                                                                                                                                                                                                                                                                                                                                                                                                                                            |
| interleukin-17 production                                                                | GO:0032620 | 3.66E-01 | 4.58E-01 | Ly9,17085:up                                                                                                                                                                                                                                                                                                                                                                                                                                                                                                                                                                                                                                                                                                                                                                                                                                                                                                                                                |
| regulation of endoplasmic reticulum stress-induced intrinsic apoptotic signaling pathway | GO:1902235 | 3.66E-01 | 4.58E-01 | Creb3l1,26427:down                                                                                                                                                                                                                                                                                                                                                                                                                                                                                                                                                                                                                                                                                                                                                                                                                                                                                                                                          |
| positive regulation of telomerase activity                                               | GO:0051973 | 3.66E-01 | 4.58E-01 | Grem1,23892:up                                                                                                                                                                                                                                                                                                                                                                                                                                                                                                                                                                                                                                                                                                                                                                                                                                                                                                                                              |
| negative regulation of exocytosis                                                        | GO:0045920 | 3.66E-01 | 4.58E-01 | Hmox1,15368:up                                                                                                                                                                                                                                                                                                                                                                                                                                                                                                                                                                                                                                                                                                                                                                                                                                                                                                                                              |
| multicellular organismal reproductive process                                            | GO:0048609 | 3.67E-01 | 4.59E-01 | Egfr,13649:down Inhba,16323:down Ptgs2,19225:down Ednrb,13618:up Plat,18791:down Igf1,16000:up Bmp4,12159:up Vdr,22337:down Cxcl12,20315:up Vegfa,22339:down Mmp2,17390:down Serpine2,20720:up Kitl,17311:up                                                                                                                                                                                                                                                                                                                                                                                                                                                                                                                                                                                                                                                                                                                                                |
| macromolecule localization                                                               | GO:0033036 | 3.68E-01 | 4.60E-01 | Ice1,218333:down Ccl2,20296:up C3,12266:up Mmp13,17386:up Ankrd1,107765:down Gpm6b,14758:up Clec4n,56620:up Postn,50706:down Akr1c18,105349:up Cd24a,12484:down Wnt5a,22418:down Bmpr1a,12166:down Il1rn,16181:up Adipoq,11450:up Bmp4,12159:up Igf1,16000:up Chst11,58250:down Tgfb2,1808:down Il1rl1,17082:down Clec4e,56619:up Htr2b,15559:down Inhba,16323:down Ccl3,20302:up Fam132b,227358:down Htr2a,15558:down Lrrc15,74488:down Kdelr3,105785:down Pparg,19016:up Gas6,14456:up Tnf,21926:up Glp1r,14652:down Egfr,13649:down Sec23a,20334:down Sfrp1,20377:up Lpl,16956:up C1qtnf3,81799:down Cd4,12504:up Ptgs2,19225:down Tfrc,22042:up Snca,20618:up Grem1,23892:up Ceacam1,26365:up Sfrp2,20319:up Npnt,114249:up Enpp1,18605:down                                                                                                                                                                                                            |
| heterocycle biosynthetic process                                                         | GO:0018130 | 3.68E-01 | 4.60E-01 | Fstl3,83554:down Ice1,218333:down Adm,11535:up Tfec,21426:up Sfrp4,20379:up Ednrb,13618:up Ampd3,11717:up Epas1,13819:up Ankrd1,107765:down Htra3,78558:down Uchl5,56207:up Lyl1,17095:up Sdpr,20324:down Loxl2,94352:down Loxl3,16950:down Trf,22041:up Wnt5a,22418:down Bmpr1a,12166:down Ccl4,20303:up Adipoq,11450:up Bmp4,12159:up Igf1,16000:up Ret,19713:up Pdkk,216134:up Plpp3,67916:up Ptgir,19222:up Creb3l1,26427:down Fgfr2,14183:up Htr2b,15559:down Pri2c2,18811:up Efemp1,216616:up Inhba,16323:down Rasl1a,68895:up Bnc2,242509:down Ccl3,20302:up Vdr,22337:down Fabp4,11770:up Vegfa,22339:down Htr2a,15558:down Igf2,16002:up Slc40a1,53945:up Pparg,19016:up Gas6,14456:up Tnf,21926:up Glp1r,14652:down Lmcd1,30937:up Fgfr1,14182:down Egfr,13649:down Hmox1,15368:up Sfrp1,20377:up Sulf1,240725:down Tgfb3,21814:up Grem1,23892:up Phf11d,219132:up Sfrp2,20319:up Tbx15,21384:down Npnt,114249:up Uck2,80914:down S100a1,20193:up |
| transcription, DNA-templated                                                             | GO:0006351 | 3.68E-01 | 4.60E-01 | Fstl3,83554:down Ice1,218333:down Tfec,21426:up Sfrp4,20379:up Ednrb,13618:up Epas1,13819:up Ankrd1,107765:down Htra3,78558:down Uchl5,56207:up Lyl1,17095:up Sdpr,20324:down Loxl2,94352:down Loxl3,16950:down Trf,22041:up Wnt5a,22418:down Bmpr1a,12166:down Adipoq,11450:up Bmp4,12159:up Igf1,16000:up Ret,19713:up Plpp3,67916:up Creb3l1,26427:down Fgfr2,14183:up Pri2c2,18811:up Efemp1,216616:up Inhba,16323:down Rasl1a,68895:up Bnc2,242509:down Ccl3,20302:up Vdr,22337:down Fabp4,11770:up Vegfa,22339:down Igf2,16002:up Slc40a1,53945:up Pparg,19016:up Gas6,14456:up Tnf,21926:up Glp1r,14652:down Lmcd1,30937:up Fgfr1,14182:down Egfr,13649:down Hmox1,15368:up Sfrp1,20377:up Sulf1,240725:down Tgfb3,21814:up Grem1,23892:up Sfrp2,20319:up Phf11d,219132:up Tbx15,21384:down Npnt,114249:up S100a1,20193:up                                                                                                                           |
| regulation of plasma membrane organization                                               | GO:1903729 | 3.68E-01 | 4.60E-01 | Tgfb2,21808:down Lrrc15,74488:down                                                                                                                                                                                                                                                                                                                                                                                                                                                                                                                                                                                                                                                                                                                                                                                                                                                                                                                          |
| regulation of heart rate                                                                 | GO:0002027 | 3.68E-01 | 4.60E-01 | Adm,11535:up Epas1,13819:up                                                                                                                                                                                                                                                                                                                                                                                                                                                                                                                                                                                                                                                                                                                                                                                                                                                                                                                                 |
| regulation of response to oxidative stress                                               | GO:1902882 | 3.68E-01 | 4.60E-01 | Tnf,21926:up Hp,15439:up                                                                                                                                                                                                                                                                                                                                                                                                                                                                                                                                                                                                                                                                                                                                                                                                                                                                                                                                    |
| myeloid leukocyte mediated immunity                                                      | GO:0002444 | 3.68E-01 | 4.60E-01 | Hmox1,15368:up C3,12266:up                                                                                                                                                                                                                                                                                                                                                                                                                                                                                                                                                                                                                                                                                                                                                                                                                                                                                                                                  |
| cell aging                                                                               | GO:0007569 | 3.68E-01 | 4.60E-01 | Preip,116847:up Bmpr1a,12166:down                                                                                                                                                                                                                                                                                                                                                                                                                                                                                                                                                                                                                                                                                                                                                                                                                                                                                                                           |
| response to insulin                                                                      | GO:0003286 | 3.69E-01 | 4.61E-01 | Pparg,19016:up Enpp1,18605:down Igf2,16002:up Adipoq,11450:up                                                                                                                                                                                                                                                                                                                                                                                                                                                                                                                                                                                                                                                                                                                                                                                                                                                                                               |
| amine metabolic process                                                                  | GO:0009308 | 3.70E-01 | 4.61E-01 | Fabp5,16592:up Maob,109731:up Epas1,13819:up                                                                                                                                                                                                                                                                                                                                                                                                                                                                                                                                                                                                                                                                                                                                                                                                                                                                                                                |
| nucleic acid-templated transcription                                                     | GO:0009769 | 3.71E-01 | 4.63E-01 | Fstl3,83554:down Ice1,218333:down Tfec,21426:up Sfrp4,20379:up Ednrb,13618:up Epas1,13819:up Ankrd1,107765:down Htra3,78558:down Uchl5,56207:up Lyl1,17095:up Sdpr,20324:down Loxl2,94352:down Loxl3,16950:down Trf,22041:up Wnt5a,22418:down Bmpr1a,12166:down Adipoq,11450:up Bmp4,12159:up Igf1,16000:up Ret,19713:up Plpp3,67916:up Creb3l1,26427:down Fgfr2,14183:up Pri2c2,18811:up Efemp1,216616:up Inhba,16323:down Rasl1a,68895:up Bnc2,242509:down Ccl3,20302:up Vdr,22337:down Fabp4,11770:up Vegfa,22339:down Igf2,16002:up Slc40a1,53945:up Pparg,19016:up Gas6,14456:up Tnf,21926:up Glp1r,14652:down Lmcd1,30937:up Fgfr1,14182:down Egfr,13649:down Hmox1,15368:up Sfrp1,20377:up Sulf1,240725:down Tgfb3,21814:up Grem1,23892:up Sfrp2,20319:up Phf11d,219132:up Tbx15,21384:down Npnt,114249:up S100a1,20193:up                                                                                                                           |

|                                                                                                                                                  |            |          |          |                                                                                                                                                                                                                                                                                                                                                                                                                                                                                                                                                                                                                                                                                                                                                                                                                                                                                                                                                                                                                                                                                                                                                                                                                                                                                                                                                              |
|--------------------------------------------------------------------------------------------------------------------------------------------------|------------|----------|----------|--------------------------------------------------------------------------------------------------------------------------------------------------------------------------------------------------------------------------------------------------------------------------------------------------------------------------------------------------------------------------------------------------------------------------------------------------------------------------------------------------------------------------------------------------------------------------------------------------------------------------------------------------------------------------------------------------------------------------------------------------------------------------------------------------------------------------------------------------------------------------------------------------------------------------------------------------------------------------------------------------------------------------------------------------------------------------------------------------------------------------------------------------------------------------------------------------------------------------------------------------------------------------------------------------------------------------------------------------------------|
| DNA metabolic process                                                                                                                            | GO:0006259 | 3.73E-01 | 4.65E-01 | Pparg,19016:up Fgfr1,14182:down Egfr,13649:down Pdgfc,54635:down Tfrc,22042:up Grem1,23892:up lgf1,16000:up Bmp4,12159:up Adipoq,11450:up Ankrd1,107765:down Uchl5,56207:up Gstt1,14871:up Nabp1,109019:down lgfbp3,16009:up Kitl,17311:up                                                                                                                                                                                                                                                                                                                                                                                                                                                                                                                                                                                                                                                                                                                                                                                                                                                                                                                                                                                                                                                                                                                   |
| nucleoside diphosphate phosphorylation                                                                                                           | GO:0006165 | 3.75E-01 | 4.67E-01 | Htr2a,15558:down lgf1,16000:up                                                                                                                                                                                                                                                                                                                                                                                                                                                                                                                                                                                                                                                                                                                                                                                                                                                                                                                                                                                                                                                                                                                                                                                                                                                                                                                               |
| nucleotide phosphorylation                                                                                                                       | GO:0046939 | 3.75E-01 | 4.67E-01 | Htr2a,15558:down lgf1,16000:up                                                                                                                                                                                                                                                                                                                                                                                                                                                                                                                                                                                                                                                                                                                                                                                                                                                                                                                                                                                                                                                                                                                                                                                                                                                                                                                               |
| cellular response to topologically incorrect protein                                                                                             | GO:0035967 | 3.75E-01 | 4.67E-01 | Sdf2l1,64136:up Creb3l1,26427:down                                                                                                                                                                                                                                                                                                                                                                                                                                                                                                                                                                                                                                                                                                                                                                                                                                                                                                                                                                                                                                                                                                                                                                                                                                                                                                                           |
| regulation of alpha-beta T cell activation                                                                                                       | GO:0046634 | 3.75E-01 | 4.67E-01 | Ceacam1,26365:up Cd24a,12484:down                                                                                                                                                                                                                                                                                                                                                                                                                                                                                                                                                                                                                                                                                                                                                                                                                                                                                                                                                                                                                                                                                                                                                                                                                                                                                                                            |
| cellular biosynthetic process                                                                                                                    | GO:0044249 | 3.77E-01 | 4.68E-01 | Fstl3,83554:down Adm,11535:up Tfec,21426:up Sfrp4,20379:up C3,12266:up Ankrd1,107765:down Lyl1,17095:up Ggt5,23887:up Loxl2,94352:down Loxl3,16950:down Trf,22041:up Wnt5a,22418:down Adipoq,11450:up Bmp4,12159:up lgf1,16000:up Tgfb2,21808:down Ptgir,19222:up Fgfr2,14183:up Htr2b,15559:down Prl2c2,18811:up Efemp1,216616:up Vdr,22337:down Fabp4,11770:up Htr2a,15558:down Slc40a1,53945:up Gas6,14456:up Egfr,13649:down Sfrp1,20377:up C1qtnf3,81799:down Tgfb3,21814:up Sfrp2,20319:up Npnt,114249:up S100a1,20193:up Ice1,218333:down Aldh1a2,19378:up Pdgfc,54635:down Ednrb,13618:up Ampd3,11717:up Epas1,13819:up Htra3,78558:down Uchl5,56207:up Ddah1,69219:down Sdpr,20324:down Cdo1,12583:up Man2a2,140481:up Ptx3,19288:up Akr1c18,105349:up Fabp5,16592:up Bmpr1a,12166:down Ccl4,20303:up Chst11,58250:down Gatm,67092:down Ret,19713:up Prg4,96875:down Vegfb,22340:up Sdf2l1,64136:up Pdxk,216134:up Aldh1a3,56847:down Plpp3,67916:up Creb3l1,26427:down Kitl,17311:up Rasl11a,68895:up Inhba,16323:down Bnc2,242509:down Ccl3,20302:up Vegfa,22339:down lgf2,16002:up Pparg,19016:up Tnf,21926:up Lmcd1,30937:up Glp1r,14652:down Fgfr1,14182:down Hmox1,15368:up Lpl,16956:up Has2,15117:down Sulf1,240725:down Psg2,19225:down Grem1,23892:up Phf11d,219132:up Tbx15,21384:down Uck2,80914:down Errf1,74155:down Enpp1,18605:down |
| regulation of transmembrane transporter activity                                                                                                 | GO:0022898 | 3.78E-01 | 4.68E-01 | Fxyd1,56188:up Fxyd2,11936:up S100a1,20193:up Bmp4,12159:up                                                                                                                                                                                                                                                                                                                                                                                                                                                                                                                                                                                                                                                                                                                                                                                                                                                                                                                                                                                                                                                                                                                                                                                                                                                                                                  |
| regulation of fatty acid transport                                                                                                               | GO:2000191 | 3.78E-01 | 4.68E-01 | Fam132b,227358:down                                                                                                                                                                                                                                                                                                                                                                                                                                                                                                                                                                                                                                                                                                                                                                                                                                                                                                                                                                                                                                                                                                                                                                                                                                                                                                                                          |
| skeletal muscle tissue regeneration                                                                                                              | GO:0043403 | 3.78E-01 | 4.68E-01 | lgf1,16000:up                                                                                                                                                                                                                                                                                                                                                                                                                                                                                                                                                                                                                                                                                                                                                                                                                                                                                                                                                                                                                                                                                                                                                                                                                                                                                                                                                |
| positive regulation of alcohol biosynthetic process                                                                                              | GO:1902932 | 3.78E-01 | 4.68E-01 | Tnf,21926:up                                                                                                                                                                                                                                                                                                                                                                                                                                                                                                                                                                                                                                                                                                                                                                                                                                                                                                                                                                                                                                                                                                                                                                                                                                                                                                                                                 |
| natural killer cell differentiation                                                                                                              | GO:0001779 | 3.78E-01 | 4.68E-01 | Gas6,14456:up                                                                                                                                                                                                                                                                                                                                                                                                                                                                                                                                                                                                                                                                                                                                                                                                                                                                                                                                                                                                                                                                                                                                                                                                                                                                                                                                                |
| necroptotic process                                                                                                                              | GO:0070266 | 3.78E-01 | 4.68E-01 | Tnf,21926:up                                                                                                                                                                                                                                                                                                                                                                                                                                                                                                                                                                                                                                                                                                                                                                                                                                                                                                                                                                                                                                                                                                                                                                                                                                                                                                                                                 |
| regulation of isotype switching                                                                                                                  | GO:0045191 | 3.78E-01 | 4.68E-01 | Tfrc,22042:up                                                                                                                                                                                                                                                                                                                                                                                                                                                                                                                                                                                                                                                                                                                                                                                                                                                                                                                                                                                                                                                                                                                                                                                                                                                                                                                                                |
| pyrimidine-containing compound biosynthetic process                                                                                              | GO:0072528 | 3.78E-01 | 4.68E-01 | Uck2,80914:down                                                                                                                                                                                                                                                                                                                                                                                                                                                                                                                                                                                                                                                                                                                                                                                                                                                                                                                                                                                                                                                                                                                                                                                                                                                                                                                                              |
| positive regulation of coagulation                                                                                                               | GO:0050820 | 3.78E-01 | 4.68E-01 | Hpse,15442:up                                                                                                                                                                                                                                                                                                                                                                                                                                                                                                                                                                                                                                                                                                                                                                                                                                                                                                                                                                                                                                                                                                                                                                                                                                                                                                                                                |
| collateral sprouting                                                                                                                             | GO:0048668 | 3.78E-01 | 4.68E-01 | Crabp2,12904:down                                                                                                                                                                                                                                                                                                                                                                                                                                                                                                                                                                                                                                                                                                                                                                                                                                                                                                                                                                                                                                                                                                                                                                                                                                                                                                                                            |
| negative regulation of dendrite development                                                                                                      | GO:2000171 | 3.78E-01 | 4.68E-01 | Plk2,20620:down                                                                                                                                                                                                                                                                                                                                                                                                                                                                                                                                                                                                                                                                                                                                                                                                                                                                                                                                                                                                                                                                                                                                                                                                                                                                                                                                              |
| regulation of gene silencing by RNA                                                                                                              | GO:0060966 | 3.78E-01 | 4.68E-01 | Egfr,13649:down                                                                                                                                                                                                                                                                                                                                                                                                                                                                                                                                                                                                                                                                                                                                                                                                                                                                                                                                                                                                                                                                                                                                                                                                                                                                                                                                              |
| transcription from RNA polymerase III promoter                                                                                                   | GO:0006383 | 3.78E-01 | 4.68E-01 | Ice1,218333:down                                                                                                                                                                                                                                                                                                                                                                                                                                                                                                                                                                                                                                                                                                                                                                                                                                                                                                                                                                                                                                                                                                                                                                                                                                                                                                                                             |
| positive regulation of tyrosine phosphorylation of Stat3 protein                                                                                 | GO:0042517 | 3.78E-01 | 4.68E-01 | Crlf1,12931:down                                                                                                                                                                                                                                                                                                                                                                                                                                                                                                                                                                                                                                                                                                                                                                                                                                                                                                                                                                                                                                                                                                                                                                                                                                                                                                                                             |
| positive regulation of receptor activity                                                                                                         | GO:2000273 | 3.78E-01 | 4.68E-01 | Grem1,23892:up                                                                                                                                                                                                                                                                                                                                                                                                                                                                                                                                                                                                                                                                                                                                                                                                                                                                                                                                                                                                                                                                                                                                                                                                                                                                                                                                               |
| ventricular system development                                                                                                                   | GO:0021591 | 3.78E-01 | 4.68E-01 | Uchl5,56207:up                                                                                                                                                                                                                                                                                                                                                                                                                                                                                                                                                                                                                                                                                                                                                                                                                                                                                                                                                                                                                                                                                                                                                                                                                                                                                                                                               |
| negative regulation of adaptive immune response based on somatic recombination of immune receptors built from immunoglobulin superfamily domains | GO:0002823 | 3.78E-01 | 4.68E-01 | Il1rl1,17082:down                                                                                                                                                                                                                                                                                                                                                                                                                                                                                                                                                                                                                                                                                                                                                                                                                                                                                                                                                                                                                                                                                                                                                                                                                                                                                                                                            |
| calcium ion-dependent exocytosis of neurotransmitter                                                                                             | GO:0048791 | 3.78E-01 | 4.68E-01 | Syt13,80976:up                                                                                                                                                                                                                                                                                                                                                                                                                                                                                                                                                                                                                                                                                                                                                                                                                                                                                                                                                                                                                                                                                                                                                                                                                                                                                                                                               |
| positive regulation of phosphatase activity                                                                                                      | GO:0010922 | 3.78E-01 | 4.68E-01 | Npnt,114249:up                                                                                                                                                                                                                                                                                                                                                                                                                                                                                                                                                                                                                                                                                                                                                                                                                                                                                                                                                                                                                                                                                                                                                                                                                                                                                                                                               |
| guanosine-containing compound metabolic process                                                                                                  | GO:1901068 | 3.78E-01 | 4.68E-01 | Ampd3,11717:up                                                                                                                                                                                                                                                                                                                                                                                                                                                                                                                                                                                                                                                                                                                                                                                                                                                                                                                                                                                                                                                                                                                                                                                                                                                                                                                                               |

|                                                                                    |            |          |          |                                                                                                                                               |
|------------------------------------------------------------------------------------|------------|----------|----------|-----------------------------------------------------------------------------------------------------------------------------------------------|
| water-soluble vitamin metabolic process                                            | GO:0006767 | 3.78E-01 | 4.68E-01 | Pdxk,216134:up                                                                                                                                |
| regulation of posttranscriptional gene silencing                                   | GO:0060147 | 3.78E-01 | 4.68E-01 | Egfr,13649:down                                                                                                                               |
| cellular response to cAMP                                                          | GO:0071320 | 3.78E-01 | 4.68E-01 | Adipoq,11450:up                                                                                                                               |
| positive regulation of cellular component biogenesis                               | GO:0044089 | 3.79E-01 | 4.69E-01 | Tnf,21926:up lce1,218333:down Flrt2,399558:down Cd24a,12484:down Dpysl3,22240:down SrpX2,68792:down Vegfa,22339:down Thbs2,21826:down         |
| alcohol metabolic process                                                          | GO:0006066 | 3.79E-01 | 4.69E-01 | Vdr,22337:down Tnf,21926:up Sord,20322:up Akr1c18,105349:up Fgfr1,14182:down Fabp5,16592:up                                                   |
| neuron fate commitment                                                             | GO:0048663 | 3.81E-01 | 4.71E-01 | Tgfb2,21808:down Bmp4,12159:up                                                                                                                |
| T cell activation involved in immune response                                      | GO:0002286 | 3.81E-01 | 4.71E-01 | Ly9,17085:up Clec4e,56619:up                                                                                                                  |
| regulation of multicellular organism growth                                        | GO:0040014 | 3.81E-01 | 4.71E-01 | Igf2,16002:up Fgfr2,14183:up                                                                                                                  |
| regulation of striated muscle contraction                                          | GO:0006942 | 3.81E-01 | 4.71E-01 | Fxyd1,56188:up Stc1,20855:up                                                                                                                  |
| positive regulation of cyclic nucleotide biosynthetic process                      | GO:0030804 | 3.81E-01 | 4.71E-01 | Adm,11535:up Ptgir,19222:up                                                                                                                   |
| cyclic nucleotide metabolic process                                                | GO:0052652 | 3.84E-01 | 4.74E-01 | Htr2b,15559:down Adm,11535:up Ptgir,19222:up                                                                                                  |
| positive regulation of protein complex assembly                                    | GO:0031334 | 3.86E-01 | 4.76E-01 | Tnf,21926:up lce1,218333:down Cd24a,12484:down Vegfa,22339:down                                                                               |
| lens fiber cell differentiation                                                    | GO:0070306 | 3.89E-01 | 4.78E-01 | Fgfr2,14183:up                                                                                                                                |
| neuromuscular synaptic transmission                                                | GO:0007274 | 3.89E-01 | 4.78E-01 | Cd24a,12484:down                                                                                                                              |
| negative regulation of endothelial cell proliferation                              | GO:0001937 | 3.89E-01 | 4.78E-01 | Sulf1,240725:down                                                                                                                             |
| negative chemotaxis                                                                | GO:0050919 | 3.89E-01 | 4.78E-01 | Wnt5a,22418:down                                                                                                                              |
| regulation of DNA damage response, signal transduction by p53 class mediator       | GO:0043516 | 3.89E-01 | 4.78E-01 | Ankrd1,107765:down                                                                                                                            |
| nucleotide-sugar metabolic process                                                 | GO:0009225 | 3.89E-01 | 4.78E-01 | Gfpt2,14584:down                                                                                                                              |
| response to interleukin-4                                                          | GO:0070670 | 3.89E-01 | 4.78E-01 | Mrc1,17533:up                                                                                                                                 |
| forebrain regionalization                                                          | GO:0021871 | 3.89E-01 | 4.78E-01 | Bmp4,12159:up                                                                                                                                 |
| production of miRNAs involved in gene silencing by miRNA                           | GO:0035196 | 3.89E-01 | 4.78E-01 | Egfr,13649:down                                                                                                                               |
| negative regulation of cell-matrix adhesion                                        | GO:0001953 | 3.89E-01 | 4.78E-01 | Postn,50706:down                                                                                                                              |
| negative regulation of potassium ion transport                                     | GO:0043267 | 3.89E-01 | 4.78E-01 | Htr2a,15558:down                                                                                                                              |
| blastocyst growth                                                                  | GO:0001832 | 3.89E-01 | 4.78E-01 | Igf1,16000:up                                                                                                                                 |
| cyclic nucleotide biosynthetic process                                             | GO:0009190 | 3.89E-01 | 4.78E-01 | Htr2b,15559:down Adm,11535:up Ptgir,19222:up                                                                                                  |
| purine-containing compound metabolic process                                       | GO:0072521 | 3.93E-01 | 4.83E-01 | Htr2b,15559:down Adm,11535:up Wnt5a,22418:down Ampd3,11717:up Igf1,16000:up Htr2a,15558:down Vegfa,22339:down Ptgir,19222:up Enpp1,18605:down |
| negative regulation of sequence-specific DNA binding transcription factor activity | GO:0043433 | 3.94E-01 | 4.83E-01 | Gas6,14456:up Hmox1,15368:up Sfrp4,20379:up                                                                                                   |
| negative regulation of dephosphorylation                                           | GO:0035305 | 3.94E-01 | 4.83E-01 | Tnf,21926:up Tgfb2,21808:down                                                                                                                 |
| amino acid transport                                                               | GO:0006865 | 3.99E-01 | 4.88E-01 | Tnf,21926:up Il1rn,16181:up Serinc2,230779:down                                                                                               |
| dorsal/ventral neural tube patterning                                              | GO:0021904 | 4.00E-01 | 4.88E-01 | Bmp4,12159:up                                                                                                                                 |
| production of small RNA involved in gene silencing by RNA                          | GO:0070918 | 4.00E-01 | 4.88E-01 | Egfr,13649:down                                                                                                                               |
| embryonic camera-type eye morphogenesis                                            | GO:0048596 | 4.00E-01 | 4.88E-01 | Aldh1a3,56847:down                                                                                                                            |

|                                                                    |             |          |          |                                                                                                                                                                                                                                                                                                                               |
|--------------------------------------------------------------------|-------------|----------|----------|-------------------------------------------------------------------------------------------------------------------------------------------------------------------------------------------------------------------------------------------------------------------------------------------------------------------------------|
| neutral lipid catabolic process                                    | GO:0046461  | 4.00E-01 | 4.88E-01 | Lpl,16956:up                                                                                                                                                                                                                                                                                                                  |
| plasma lipoprotein particle clearance                              | GO:0034381  | 4.00E-01 | 4.88E-01 | Adipoq,11450:up                                                                                                                                                                                                                                                                                                               |
| mammary gland epithelial cell proliferation                        | GO:0033598  | 4.00E-01 | 4.88E-01 | Wnt5a,22418:down                                                                                                                                                                                                                                                                                                              |
| pyrimidine nucleotide metabolic process                            | GO:0006220  | 4.00E-01 | 4.88E-01 | Uck2,80914:down                                                                                                                                                                                                                                                                                                               |
| transcription from RNA polymerase I promoter                       | GO:0006360  | 4.00E-01 | 4.88E-01 | Rasl11a,68895:up                                                                                                                                                                                                                                                                                                              |
| positive T cell selection                                          | GO:0043368  | 4.00E-01 | 4.88E-01 | Ly9,17085:up                                                                                                                                                                                                                                                                                                                  |
| regulation of extracellular matrix organization                    | GO:1903053  | 4.00E-01 | 4.88E-01 | Tgfb2,21808:down                                                                                                                                                                                                                                                                                                              |
| regulation of thymocyte aggregation                                | GO:2000398  | 4.00E-01 | 4.88E-01 | Bmp4,12159:up                                                                                                                                                                                                                                                                                                                 |
| synaptic vesicle endocytosis                                       | GO:0048488  | 4.00E-01 | 4.88E-01 | Cd24a,12484:down                                                                                                                                                                                                                                                                                                              |
| glutamate secretion                                                | GO:0014047  | 4.00E-01 | 4.88E-01 | Il1rn,16181:up                                                                                                                                                                                                                                                                                                                |
| inner ear receptor stereocilium organization                       | GO:0060122  | 4.00E-01 | 4.88E-01 | Cthrc1,68588:down                                                                                                                                                                                                                                                                                                             |
| dsRNA fragmentation                                                | GO:0031050  | 4.00E-01 | 4.88E-01 | Egfr,13649:down                                                                                                                                                                                                                                                                                                               |
| regulation of cell aging                                           | GO:0090342  | 4.00E-01 | 4.88E-01 | Bmpr1a,12166:down                                                                                                                                                                                                                                                                                                             |
| acylglycerol catabolic process                                     | GO:0046464  | 4.00E-01 | 4.88E-01 | Lpl,16956:up                                                                                                                                                                                                                                                                                                                  |
| cGMP biosynthetic process                                          | GO:0006182  | 4.00E-01 | 4.88E-01 | Htr2b,15559:down                                                                                                                                                                                                                                                                                                              |
| cortical actin cytoskeleton organization                           | GO:0030866  | 4.00E-01 | 4.88E-01 | Tnf,21926:up                                                                                                                                                                                                                                                                                                                  |
| regulation of T cell differentiation in thymus                     | GO:0033081  | 4.00E-01 | 4.88E-01 | Bmp4,12159:up                                                                                                                                                                                                                                                                                                                 |
| regulation of meiotic nuclear division                             | GO:0040020  | 4.00E-01 | 4.88E-01 | Wnt5a,22418:down                                                                                                                                                                                                                                                                                                              |
| regulation of cation channel activity                              | GO:2001257  | 4.01E-01 | 4.89E-01 | S100a1,20193:up Bmp4,12159:up                                                                                                                                                                                                                                                                                                 |
| single-organism cellular localization                              | GO:1902580  | 4.02E-01 | 4.90E-01 | Ccl2,20296:up Lrrc15,74488:down Gas6,14456:up Tnf,21926:up Akr1c18,105349:up Cd24a,12484:down Egfr,13649:down Hmox1,15368:up C1qtnf3,81799:down Bmpr1a,12166:down Ptgs2,19225:down Grem1,23892:up Adipoq,11450:up Bmp4,12159:up lgf1,16000:up Ceacam1,26365:up Sfrp2,20319:up Tgfb2,21808:down Fgfr2,14183:up Sytn13,80976:up |
| response to radiation                                              | GO:0009314  | 4.03E-01 | 4.91E-01 | Pparg,19016:up Sfrp2,20319:up Egfr,13649:down Sfrp1,20377:up Mme,17380:up Nabp1,109019:down Ccl3a1,12825:down                                                                                                                                                                                                                 |
| phospholipid biosynthetic process                                  | GO:0008654  | 4.04E-01 | 4.92E-01 | Htr2b,15559:down Fabp5,16592:up Htr2a,15558:down                                                                                                                                                                                                                                                                              |
| cellular response to hypoxia                                       | GO:00071456 | 4.07E-01 | 4.96E-01 | Vegfa,22339:down Epas1,13819:up                                                                                                                                                                                                                                                                                               |
| oligodendrocyte differentiation                                    | GO:00048709 | 4.07E-01 | 4.96E-01 | Pparg,19016:up Bmp4,12159:up                                                                                                                                                                                                                                                                                                  |
| positive regulation of transporter activity                        | GO:0032411  | 4.07E-01 | 4.96E-01 | S100a1,20193:up Bmp4,12159:up                                                                                                                                                                                                                                                                                                 |
| embryonic heart tube development                                   | GO:00035050 | 4.07E-01 | 4.96E-01 | Wnt5a,22418:down Aldh1a2,19378:up                                                                                                                                                                                                                                                                                             |
| fatty acid biosynthetic process                                    | GO:0006633  | 4.09E-01 | 4.98E-01 | Ggt5,23887:up Lpl,16956:up Ptgs2,19225:down                                                                                                                                                                                                                                                                                   |
| aging                                                              | GO:0007568  | 4.09E-01 | 4.98E-01 | Ncam1,17967:down Prep1,116847:up Bmpr1a,12166:down                                                                                                                                                                                                                                                                            |
| insulin secretion                                                  | GO:0030073  | 4.10E-01 | 4.99E-01 | Tnf,21926:up Glp1r,14652:down Sfrp1,20377:up Il1rn,16181:up                                                                                                                                                                                                                                                                   |
| cytoplasmic sequestering of protein                                | GO:0051220  | 4.11E-01 | 4.99E-01 | Kdelr3,105785:down                                                                                                                                                                                                                                                                                                            |
| response to food                                                   | GO:0032094  | 4.11E-01 | 4.99E-01 | Pparg,19016:up                                                                                                                                                                                                                                                                                                                |
| positive regulation of substrate adhesion-dependent cell spreading | GO:1900026  | 4.11E-01 | 4.99E-01 | Has2,15117:down                                                                                                                                                                                                                                                                                                               |
| positive regulation of NIK/NF-kappaB signaling                     | GO:1901224  | 4.11E-01 | 4.99E-01 | Tnf,21926:up                                                                                                                                                                                                                                                                                                                  |
| mating behavior                                                    | GO:0007617  | 4.11E-01 | 4.99E-01 | Serpine2,20720:up                                                                                                                                                                                                                                                                                                             |

|                                                                 |            |          |          |                                                                                                                                                                                |
|-----------------------------------------------------------------|------------|----------|----------|--------------------------------------------------------------------------------------------------------------------------------------------------------------------------------|
| regulation of protein export from nucleus                       | GO:0046825 | 4.11E-01 | 4.99E-01 | Gas6,14456:up                                                                                                                                                                  |
| cell differentiation involved in embryonic placenta development | GO:0060706 | 4.11E-01 | 4.99E-01 | Gjb5,14622:down                                                                                                                                                                |
| regulation of the force of heart contraction                    | GO:0002026 | 4.11E-01 | 4.99E-01 | Adm,11535:up                                                                                                                                                                   |
| NADH metabolic process                                          | GO:0006734 | 4.11E-01 | 4.99E-01 | Cbr2,12409:up                                                                                                                                                                  |
| negative regulation of adaptive immune response                 | GO:0002820 | 4.11E-01 | 4.99E-01 | Il1r1,17082:down                                                                                                                                                               |
| negative regulation of glial cell differentiation               | GO:0045686 | 4.11E-01 | 4.99E-01 | Bmp4,12159:up                                                                                                                                                                  |
| sodium ion transmembrane transport                              | GO:0035725 | 4.13E-01 | 5.01E-01 | Fxyd1,56188:up Fxyd2,11936:up                                                                                                                                                  |
| response to calcium ion                                         | GO:0051592 | 4.13E-01 | 5.01E-01 | Akr1c18,105349:up Egfr,13649:down                                                                                                                                              |
| negative regulation of protein binding                          | GO:0032091 | 4.13E-01 | 5.01E-01 | Slpi,20568:up Adipoq,11450:up                                                                                                                                                  |
| response to purine-containing compound                          | GO:0014074 | 4.13E-01 | 5.01E-01 | Cdo1,12583:up Adipoq,11450:up                                                                                                                                                  |
| actin filament-based process                                    | GO:0030029 | 4.14E-01 | 5.02E-01 | Fam101b,76566:down Tnf,21926:up Fxyd1,56188:up Trf,22041:up Sfrp1,20377:up Ptk7,71461:down Dpysl3,22240:down Stc1,20855:up Gpm6b,14758:up Shroom4,208431:down Tgfb2,21808:down |
| establishment of protein localization to plasma membrane        | GO:0090002 | 4.18E-01 | 5.07E-01 | Tnf,21926:up Gas6,14456:up Lrrc15,74488:down                                                                                                                                   |
| sensory perception of sound                                     | GO:0007605 | 4.18E-01 | 5.07E-01 | Fgfr1,14182:down Col11a1,12814:down Mcoln3,171166:up                                                                                                                           |
| response to nutrient levels                                     | GO:0031667 | 4.19E-01 | 5.08E-01 | Pparg,19016:up Gas6,14456:up Lmcd1,30937:up Hmox1,15368:up Sfrp4,20379:up Vdr,22337:down Gatm,67092:down Plod2,26432:down Postn,50706:down                                     |
| positive regulation of nucleotide biosynthetic process          | GO:0030810 | 4.20E-01 | 5.08E-01 | Adm,11535:up Ptgir,19222:up                                                                                                                                                    |
| actin filament-based movement                                   | GO:0030048 | 4.20E-01 | 5.08E-01 | Fxyd1,56188:up Stc1,20855:up                                                                                                                                                   |
| cellular response to decreased oxygen levels                    | GO:0036294 | 4.20E-01 | 5.08E-01 | Vegfa,22339:down Epas1,13819:up                                                                                                                                                |
| positive regulation of purine nucleotide biosynthetic process   | GO:1900373 | 4.20E-01 | 5.08E-01 | Adm,11535:up Ptgir,19222:up                                                                                                                                                    |
| positive regulation of cell mediated immunity                   | GO:0002711 | 4.22E-01 | 5.09E-01 | Cd24a,12484:down                                                                                                                                                               |
| sulfur amino acid metabolic process                             | GO:0000096 | 4.22E-01 | 5.09E-01 | Cdo1,12583:up                                                                                                                                                                  |
| eye photoreceptor cell development                              | GO:0042462 | 4.22E-01 | 5.09E-01 | Vegfa,22339:down                                                                                                                                                               |
| peptidyl-proline modification                                   | GO:0018208 | 4.22E-01 | 5.09E-01 | P4ha1,18451:down                                                                                                                                                               |
| regulation of mast cell degranulation                           | GO:0043304 | 4.22E-01 | 5.09E-01 | Hmox1,15368:up                                                                                                                                                                 |
| ketone biosynthetic process                                     | GO:0042181 | 4.22E-01 | 5.09E-01 | Akr1c18,105349:up                                                                                                                                                              |
| p38MAPK cascade                                                 | GO:0038066 | 4.22E-01 | 5.09E-01 | Vegfa,22339:down                                                                                                                                                               |
| positive regulation of smoothened signaling pathway             | GO:0045880 | 4.22E-01 | 5.09E-01 | Sfrp1,20377:up                                                                                                                                                                 |
| regulation of mast cell activation involved in immune response  | GO:0033006 | 4.22E-01 | 5.09E-01 | Hmox1,15368:up                                                                                                                                                                 |
| regulation of astrocyte differentiation                         | GO:0048710 | 4.22E-01 | 5.09E-01 | Serpine2,20720:up                                                                                                                                                              |
| embryonic axis specification                                    | GO:0000578 | 4.22E-01 | 5.09E-01 | Wnt5a,22418:down                                                                                                                                                               |
| positive regulation of interleukin-12 production                | GO:0032735 | 4.22E-01 | 5.09E-01 | Tnfsf9,21950:up                                                                                                                                                                |
| mRNA stabilization                                              | GO:0048255 | 4.22E-01 | 5.09E-01 | Vegfa,22339:down                                                                                                                                                               |
| oxidoreduction coenzyme metabolic process                       | GO:0006733 | 4.23E-01 | 5.10E-01 | Htr2a,15558:down Cbr2,12409:up Igf1,16000:up                                                                                                                                   |
| glycoprotein biosynthetic process                               | GO:0009101 | 4.24E-01 | 5.11E-01 | Chst11,58250:down Sdf2l1,64136:up Vegfb,22340:up Man2a2,140481:up Igf1,16000:up                                                                                                |
| negative regulation of intrinsic apoptotic signaling pathway    | GO:2001243 | 4.26E-01 | 5.13E-01 | Cxcl12,20315:up Creb3l1,26427:down                                                                                                                                             |

|                                                                               |            |          |          |                                                                                                                                                                                                                                            |
|-------------------------------------------------------------------------------|------------|----------|----------|--------------------------------------------------------------------------------------------------------------------------------------------------------------------------------------------------------------------------------------------|
| regulation of transporter activity                                            | GO:0032409 | 4.27E-01 | 5.14E-01 | Fxyd1,56188:up Fxyd2,11936:up S100a1,20193:up Bmp4,12159:up                                                                                                                                                                                |
| regulation of response to DNA damage stimulus                                 | GO:2001020 | 4.28E-01 | 5.15E-01 | Ankrd1,107765:down Egfr,13649:down Cxcl12,20315:up                                                                                                                                                                                         |
| vesicle docking involved in exocytosis                                        | GO:0006904 | 4.32E-01 | 5.19E-01 | Ncam1,17967:down                                                                                                                                                                                                                           |
| regulation of viral transcription                                             | GO:0046782 | 4.32E-01 | 5.19E-01 | Ccl4,20303:up                                                                                                                                                                                                                              |
| cell cycle DNA replication                                                    | GO:0044786 | 4.32E-01 | 5.19E-01 | Fgfr1,14182:down                                                                                                                                                                                                                           |
| regulation of sterol transport                                                | GO:0032371 | 4.32E-01 | 5.19E-01 | Adipoq,11450:up                                                                                                                                                                                                                            |
| lung epithelial cell differentiation                                          | GO:0060487 | 4.32E-01 | 5.19E-01 | Igf1,16000:up                                                                                                                                                                                                                              |
| regulation of intrinsic apoptotic signaling pathway in response to DNA damage | GO:1902229 | 4.32E-01 | 5.19E-01 | Cxcl12,20315:up                                                                                                                                                                                                                            |
| RNA stabilization                                                             | GO:0043489 | 4.32E-01 | 5.19E-01 | Vegfa,22339:down                                                                                                                                                                                                                           |
| myeloid dendritic cell activation                                             | GO:0001773 | 4.32E-01 | 5.19E-01 | Tnfsf9,21950:up                                                                                                                                                                                                                            |
| regulation of fatty acid oxidation                                            | GO:0046320 | 4.32E-01 | 5.19E-01 | Pparg,19016:up                                                                                                                                                                                                                             |
| regulation of cholesterol transport                                           | GO:0032374 | 4.32E-01 | 5.19E-01 | Adipoq,11450:up                                                                                                                                                                                                                            |
| regulation of fibroblast migration                                            | GO:0010762 | 4.32E-01 | 5.19E-01 | Fgfr1,14182:down                                                                                                                                                                                                                           |
| hindbrain development                                                         | GO:0030902 | 4.38E-01 | 5.25E-01 | Aldh1a2,19378:up Serpine2,20720:up Igf1,16000:up                                                                                                                                                                                           |
| B cell proliferation                                                          | GO:0042100 | 4.38E-01 | 5.25E-01 | Cd24a,12484:down Tfrc,22042:up                                                                                                                                                                                                             |
| pigmentation                                                                  | GO:0043473 | 4.38E-01 | 5.25E-01 | Ednrb,13618:up Kitl,17311:up                                                                                                                                                                                                               |
| positive regulation of lymphocyte differentiation                             | GO:0045621 | 4.38E-01 | 5.25E-01 | Gas6,14456:up Tnfsf9,21950:up                                                                                                                                                                                                              |
| glycosyl compound metabolic process                                           | GO:1901657 | 4.40E-01 | 5.27E-01 | Akr1c18,105349:up Htr2a,15558:down Uck2,80914:down Enpp1,18605:down Ampd3,11717:up Igf1,16000:up                                                                                                                                           |
| G1/S transition of mitotic cell cycle                                         | GO:000082  | 4.42E-01 | 5.28E-01 | Plk2,20620:down Egfr,13649:down Inhba,16323:down                                                                                                                                                                                           |
| regulation of dephosphorylation                                               | GO:0035303 | 4.42E-01 | 5.28E-01 | Tnf,21926:up Tgfb2,21808:down Npnt,114249:up                                                                                                                                                                                               |
| plasma lipoprotein particle organization                                      | GO:0071827 | 4.43E-01 | 5.28E-01 | Lpl,16956:up                                                                                                                                                                                                                               |
| phosphatidylcholine metabolic process                                         | GO:0046470 | 4.43E-01 | 5.28E-01 | Fabp5,16592:up                                                                                                                                                                                                                             |
| negative regulation of T cell differentiation                                 | GO:0045581 | 4.43E-01 | 5.28E-01 | Bmp4,12159:up                                                                                                                                                                                                                              |
| phospholipid dephosphorylation                                                | GO:0046839 | 4.43E-01 | 5.28E-01 | Plpp3,67916:up                                                                                                                                                                                                                             |
| neutral amino acid transport                                                  | GO:0015804 | 4.43E-01 | 5.28E-01 | Serinc2,230779:down                                                                                                                                                                                                                        |
| regulation of filopodium assembly                                             | GO:0051489 | 4.43E-01 | 5.28E-01 | Dpysl3,22240:down                                                                                                                                                                                                                          |
| lung cell differentiation                                                     | GO:0060479 | 4.43E-01 | 5.28E-01 | Igf1,16000:up                                                                                                                                                                                                                              |
| regulation of transcription regulatory region DNA binding                     | GO:2000677 | 4.43E-01 | 5.28E-01 | Igf1,16000:up                                                                                                                                                                                                                              |
| intestinal absorption                                                         | GO:0050892 | 4.43E-01 | 5.28E-01 | Vdr,22337:down                                                                                                                                                                                                                             |
| synaptic transmission, dopaminergic                                           | GO:0001963 | 4.43E-01 | 5.28E-01 | Ptgs2,19225:down                                                                                                                                                                                                                           |
| negative regulation of insulin receptor signaling pathway                     | GO:0046627 | 4.43E-01 | 5.28E-01 | Enpp1,18605:down                                                                                                                                                                                                                           |
| regulation of centrosome duplication                                          | GO:0010824 | 4.43E-01 | 5.28E-01 | Plk2,20620:down                                                                                                                                                                                                                            |
| serine family amino acid metabolic process                                    | GO:0009069 | 4.43E-01 | 5.28E-01 | Cdo1,12583:up                                                                                                                                                                                                                              |
| phagocytosis, engulfment                                                      | GO:0006911 | 4.43E-01 | 5.28E-01 | Pparg,19016:up                                                                                                                                                                                                                             |
| protein localization to cytoskeleton                                          | GO:0044380 | 4.43E-01 | 5.28E-01 | Htr2a,15558:down                                                                                                                                                                                                                           |
| cell projection morphogenesis                                                 | GO:0048858 | 4.43E-01 | 5.28E-01 | Frt2,399558:down Lama2,16773:down Egfr,13649:down Plxnd1,67784:up Wnt5a,22418:down Sema7a,20361:down Tnfrsf12a,27279:down Crabp2,12904:down Ret,19713:up Cxcl12,20315:up Postn,50706:down Vegfa,22339:down Tgfb2,21808:down Fgfr2,14183:up |



|                                                                 |             |          |          |                                                                                                                                                                                                                                                                                                                                                                                                                                                                                                                                                                                                                                                                                                                                                                                                                                                                                                                                                                   |
|-----------------------------------------------------------------|-------------|----------|----------|-------------------------------------------------------------------------------------------------------------------------------------------------------------------------------------------------------------------------------------------------------------------------------------------------------------------------------------------------------------------------------------------------------------------------------------------------------------------------------------------------------------------------------------------------------------------------------------------------------------------------------------------------------------------------------------------------------------------------------------------------------------------------------------------------------------------------------------------------------------------------------------------------------------------------------------------------------------------|
| regulation of gene expression                                   | GO:0010468  | 4.47E-01 | 5.33E-01 | Fstl3,83554:down Ice1,218333:down Tfec,21426:up Sfrp4,20379:up Aldh1a2,19378:up C3,12266:up Ednrb,13618:up Epas1,13819:up Ankrd1,107765:down Htra3,78558:down Uchl5,56207:up Lyl1,17095:up Sdpr,20324:down Loxl2,94352:down Loxl3,16950:down Trf,22041:up Wnt5a,22418:down Bmpr1a,12166:down Ccl4,20303:up Adipoq,11450:up Bmp4,12159:up Igf1,16000:up Tnc,21923:down Ret,19713:up Tgfb2,21808:down Plpp3,67916:up Creb3l1,26427:down Fgfr2,14183:up Pri2c2,18811:up Efemp1,216616:up Inhba,16323:down Ras11a,68895:up Bnc2,242509:down Ccl3,20302:up Vdr,22337:down Ctla2a,13024:down Fabp4,11770:up Vegfa,22339:down Serpine2,20720:up Igf2,16002:up Slc40a1,53945:up Pparg,19016:up Gas6,14456:up Tnf,21926:up Glp1r,14652:down Lmcd1,30937:up Fgfr1,14182:down Egfr,13649:down Hmox1,15368:up Sfrp1,20377:up Sulf1,240725:down Tgfb3,21814:up Grem1,23892:up Phf11d,219132:up Sfrp2,20319:up Tbx15,21384:down Serpig1,12258:up Npnt,114249:up S100a1,20193:up |
| response to unfolded protein                                    | GO:0006986  | 4.50E-01 | 5.36E-01 | Sdf2l1,64136:up Creb3l1,26427:down                                                                                                                                                                                                                                                                                                                                                                                                                                                                                                                                                                                                                                                                                                                                                                                                                                                                                                                                |
| regulation of hematopoietic progenitor cell differentiation     | GO:1901532  | 4.53E-01 | 5.38E-01 | Vegfa,22339:down                                                                                                                                                                                                                                                                                                                                                                                                                                                                                                                                                                                                                                                                                                                                                                                                                                                                                                                                                  |
| energy homeostasis                                              | GO:0009709  | 4.53E-01 | 5.38E-01 | Ampd3,11717:up                                                                                                                                                                                                                                                                                                                                                                                                                                                                                                                                                                                                                                                                                                                                                                                                                                                                                                                                                    |
| cellular response to glucocorticoid stimulus                    | GO:00071385 | 4.53E-01 | 5.38E-01 | Bmp4,12159:up                                                                                                                                                                                                                                                                                                                                                                                                                                                                                                                                                                                                                                                                                                                                                                                                                                                                                                                                                     |
| embryonic eye morphogenesis                                     | GO:00048048 | 4.53E-01 | 5.38E-01 | Aldh1a3,56847:down                                                                                                                                                                                                                                                                                                                                                                                                                                                                                                                                                                                                                                                                                                                                                                                                                                                                                                                                                |
| protein localization to endoplasmic reticulum                   | GO:00070972 | 4.53E-01 | 5.38E-01 | Kdelr3,105785:down                                                                                                                                                                                                                                                                                                                                                                                                                                                                                                                                                                                                                                                                                                                                                                                                                                                                                                                                                |
| negative regulation of transcription factor import into nucleus | GO:00042992 | 4.53E-01 | 5.38E-01 | C1qtnf3,81799:down                                                                                                                                                                                                                                                                                                                                                                                                                                                                                                                                                                                                                                                                                                                                                                                                                                                                                                                                                |
| homeostasis of number of cells within a tissue                  | GO:00048873 | 4.53E-01 | 5.38E-01 | Vegfa,22339:down                                                                                                                                                                                                                                                                                                                                                                                                                                                                                                                                                                                                                                                                                                                                                                                                                                                                                                                                                  |
| regulation of tyrosine phosphorylation of Stat3 protein         | GO:00042516 | 4.53E-01 | 5.38E-01 | Crfl1,12931:down                                                                                                                                                                                                                                                                                                                                                                                                                                                                                                                                                                                                                                                                                                                                                                                                                                                                                                                                                  |
| negative regulation of lymphocyte apoptotic process             | GO:00070229 | 4.53E-01 | 5.38E-01 | Bmp4,12159:up                                                                                                                                                                                                                                                                                                                                                                                                                                                                                                                                                                                                                                                                                                                                                                                                                                                                                                                                                     |
| ncRNA transcription                                             | GO:00098781 | 4.53E-01 | 5.38E-01 | Ice1,218333:down                                                                                                                                                                                                                                                                                                                                                                                                                                                                                                                                                                                                                                                                                                                                                                                                                                                                                                                                                  |
| membrane hyperpolarization                                      | GO:00060081 | 4.53E-01 | 5.38E-01 | Adipoq,11450:up                                                                                                                                                                                                                                                                                                                                                                                                                                                                                                                                                                                                                                                                                                                                                                                                                                                                                                                                                   |
| semaphorin-plexin signaling pathway                             | GO:00071526 | 4.53E-01 | 5.38E-01 | Plxnd1,67784:up                                                                                                                                                                                                                                                                                                                                                                                                                                                                                                                                                                                                                                                                                                                                                                                                                                                                                                                                                   |
| cerebellar cortex morphogenesis                                 | GO:00021696 | 4.53E-01 | 5.38E-01 | Serpine2,20720:up                                                                                                                                                                                                                                                                                                                                                                                                                                                                                                                                                                                                                                                                                                                                                                                                                                                                                                                                                 |
| ribonucleoside monophosphate metabolic process                  | GO:00009161 | 4.55E-01 | 5.40E-01 | Htr2a,15558:down Uck2,80914:down Ampd3,11717:up Igf1,16000:up                                                                                                                                                                                                                                                                                                                                                                                                                                                                                                                                                                                                                                                                                                                                                                                                                                                                                                     |
| regulation of DNA binding                                       | GO:00051101 | 4.56E-01 | 5.42E-01 | Hmox1,15368:up Igf1,16000:up                                                                                                                                                                                                                                                                                                                                                                                                                                                                                                                                                                                                                                                                                                                                                                                                                                                                                                                                      |
| triglyceride metabolic process                                  | GO:00006641 | 4.56E-01 | 5.42E-01 | Lpl,16956:up C3,12266:up                                                                                                                                                                                                                                                                                                                                                                                                                                                                                                                                                                                                                                                                                                                                                                                                                                                                                                                                          |
| cellular response to oxygen levels                              | GO:00071453 | 4.56E-01 | 5.42E-01 | Vegfa,22339:down Epas1,13819:up                                                                                                                                                                                                                                                                                                                                                                                                                                                                                                                                                                                                                                                                                                                                                                                                                                                                                                                                   |
| lymphocyte activation involved in immune response               | GO:00002285 | 4.57E-01 | 5.42E-01 | Ly9,17085:up Tfrc,22042:up Clec4e,56619:up                                                                                                                                                                                                                                                                                                                                                                                                                                                                                                                                                                                                                                                                                                                                                                                                                                                                                                                        |
| cellular response to nutrient levels                            | GO:00031669 | 4.59E-01 | 5.44E-01 | Vdr,22337:down Gas6,14456:up Lmcd1,30937:up Plod2,26432:down Hmox1,15368:up Postn,50706:down Sfrp4,20379:up                                                                                                                                                                                                                                                                                                                                                                                                                                                                                                                                                                                                                                                                                                                                                                                                                                                       |
| learning                                                        | GO:00007612 | 4.61E-01 | 5.46E-01 | Glp1r,14652:down Ptgs2,19225:down Prkar2b,19088:up                                                                                                                                                                                                                                                                                                                                                                                                                                                                                                                                                                                                                                                                                                                                                                                                                                                                                                                |
| stem cell maintenance                                           | GO:00019827 | 4.61E-01 | 5.46E-01 | Fgfr1,14182:down Sfrp1,20377:up Bmpr1a,12166:down                                                                                                                                                                                                                                                                                                                                                                                                                                                                                                                                                                                                                                                                                                                                                                                                                                                                                                                 |
| regulation of cellular macromolecule biosynthetic process       | GO:2000112  | 4.61E-01 | 5.46E-01 | Fstl3,83554:down Ice1,218333:down Tfec,21426:up Sfrp4,20379:up Pdgfr,54635:down Ednrb,13618:up Epas1,13819:up Ankrd1,107765:down Htra3,78558:down Uchl5,56207:up Lyl1,17095:up Sdpr,20324:down Loxl2,94352:down Loxl3,16950:down Trf,22041:up Wnt5a,22418:down Bmpr1a,12166:down Adipoq,11450:up Bmp4,12159:up Igf1,16000:up Ret,19713:up Plpp3,67916:up Creb3l1,26427:down Fgfr2,14183:up Kitl,17311:up Pri2c2,18811:up Efemp1,216616:up Inhba,16323:down Ras11a,68895:up Bnc2,242509:down Ccl3,20302:up Vdr,22337:down Fabp4,11770:up Vegfa,22339:down Igf2,16002:up Slc40a1,53945:up Pparg,19016:up Gas6,14456:up Tnf,21926:up Glp1r,14652:down Lmcd1,30937:up Fgfr1,14182:down Egfr,13649:down Hmox1,15368:up Sfrp1,20377:up Sulf1,240725:down Tgfb3,21814:up Grem1,23892:up Phf11d,219132:up Sfrp2,20319:up Tbx15,21384:down Npnt,114249:up Enpp1,18605:down S100a1,20193:up                                                                                 |
| platelet activation                                             | GO:00030168 | 4.63E-01 | 5.46E-01 | Ceacam1,26365:up Serpine2,20720:up                                                                                                                                                                                                                                                                                                                                                                                                                                                                                                                                                                                                                                                                                                                                                                                                                                                                                                                                |
| regulation of lipid transport                                   | GO:00032368 | 4.63E-01 | 5.46E-01 | Fam132b,227358:down Adipoq,11450:up                                                                                                                                                                                                                                                                                                                                                                                                                                                                                                                                                                                                                                                                                                                                                                                                                                                                                                                               |
| digestive system process                                        | GO:00022600 | 4.63E-01 | 5.46E-01 | Vdr,22337:down Mmp13,17386:up                                                                                                                                                                                                                                                                                                                                                                                                                                                                                                                                                                                                                                                                                                                                                                                                                                                                                                                                     |
| positive regulation of embryonic development                    | GO:00040019 | 4.63E-01 | 5.46E-01 | Igf1,16000:up                                                                                                                                                                                                                                                                                                                                                                                                                                                                                                                                                                                                                                                                                                                                                                                                                                                                                                                                                     |

|                                                                 |            |          |          |                                                                                                                                                                                                                                             |
|-----------------------------------------------------------------|------------|----------|----------|---------------------------------------------------------------------------------------------------------------------------------------------------------------------------------------------------------------------------------------------|
| myotube cell development                                        | GO:0014904 | 4.63E-01 | 5.46E-01 | Igf1,16000:up                                                                                                                                                                                                                               |
| bicellular tight junction assembly                              | GO:0070830 | 4.63E-01 | 5.46E-01 | Tnf,21926:up                                                                                                                                                                                                                                |
| regulation of protein deacetylation                             | GO:0090311 | 4.63E-01 | 5.46E-01 | Vegfa,22339:down                                                                                                                                                                                                                            |
| positive regulation of epithelial to mesenchymal transition     | GO:0010718 | 4.63E-01 | 5.46E-01 | Tgfb2,21808:down                                                                                                                                                                                                                            |
| protein-lipid complex subunit organization                      | GO:0071825 | 4.63E-01 | 5.46E-01 | Lpl,16956:up                                                                                                                                                                                                                                |
| viral transcription                                             | GO:0019083 | 4.63E-01 | 5.46E-01 | Ccl4,20303:up                                                                                                                                                                                                                               |
| snRNA metabolic process                                         | GO:0016073 | 4.63E-01 | 5.46E-01 | Ice1,218333:down                                                                                                                                                                                                                            |
| programmed necrotic cell death                                  | GO:0097300 | 4.63E-01 | 5.46E-01 | Tnf,21926:up                                                                                                                                                                                                                                |
| cellular response to ammonium ion                               | GO:0071242 | 4.63E-01 | 5.46E-01 | Htr2b,15559:down                                                                                                                                                                                                                            |
| regulation of peptidyl-threonine phosphorylation                | GO:0010799 | 4.63E-01 | 5.46E-01 | Wnt5a,22418:down                                                                                                                                                                                                                            |
| negative regulation of response to endoplasmic reticulum stress | GO:1903573 | 4.63E-01 | 5.46E-01 | Creb3l1,26427:down                                                                                                                                                                                                                          |
| protein targeting to membrane                                   | GO:0006612 | 4.68E-01 | 5.53E-01 | Gas6,14456:up Ccl2,20296:up                                                                                                                                                                                                                 |
| synaptic transmission, cholinergic                              | GO:0007271 | 4.72E-01 | 5.56E-01 | Lama2,16773:down                                                                                                                                                                                                                            |
| tyrosine phosphorylation of Stat3 protein                       | GO:0042503 | 4.72E-01 | 5.56E-01 | Crlf1,12931:down                                                                                                                                                                                                                            |
| membrane protein ectodomain proteolysis                         | GO:0006509 | 4.72E-01 | 5.56E-01 | Tnf,21926:up                                                                                                                                                                                                                                |
| synaptic vesicle recycling                                      | GO:0036465 | 4.72E-01 | 5.56E-01 | Cd24a,12484:down                                                                                                                                                                                                                            |
| xenobiotic metabolic process                                    | GO:0006805 | 4.72E-01 | 5.56E-01 | Gstt1,14871:up                                                                                                                                                                                                                              |
| cortical cytoskeleton organization                              | GO:0030865 | 4.72E-01 | 5.56E-01 | Tnf,21926:up                                                                                                                                                                                                                                |
| regulation of cell cycle G1/S phase transition                  | GO:1902806 | 4.74E-01 | 5.58E-01 | Egfr,13649:down Susd2,71733:up                                                                                                                                                                                                              |
| regulation of cAMP biosynthetic process                         | GO:0030817 | 4.74E-01 | 5.58E-01 | Adm,11535:up Ptgir,19222:up                                                                                                                                                                                                                 |
| organophosphate biosynthetic process                            | GO:0090407 | 4.76E-01 | 5.60E-01 | Htr2b,15559:down Adm,11535:up Fabp5,16592:up Ampd3,11717:up Igf1,16000:up Pdxk,216134:up Htr2a,15558:down Ptgir,19222:up Uck2,80914:down                                                                                                    |
| nucleoside monophosphate metabolic process                      | GO:0009123 | 4.78E-01 | 5.63E-01 | Htr2a,15558:down Uck2,80914:down Ampd3,11717:up Igf1,16000:up                                                                                                                                                                               |
| intracellular steroid hormone receptor signaling pathway        | GO:0030518 | 4.80E-01 | 5.65E-01 | Sfrp1,20377:up Igf1,16000:up                                                                                                                                                                                                                |
| insulin receptor signaling pathway                              | GO:0008286 | 4.80E-01 | 5.65E-01 | Enpp1,18605:down Igf2,16002:up                                                                                                                                                                                                              |
| nucleobase metabolic process                                    | GO:0009112 | 4.82E-01 | 5.65E-01 | Uck2,80914:down                                                                                                                                                                                                                             |
| negative regulation of DNA binding                              | GO:0043392 | 4.82E-01 | 5.65E-01 | Hmox1,15368:up                                                                                                                                                                                                                              |
| positive regulation of DNA repair                               | GO:0045739 | 4.82E-01 | 5.65E-01 | Egfr,13649:down                                                                                                                                                                                                                             |
| negative regulation of endothelial cell migration               | GO:0010596 | 4.82E-01 | 5.65E-01 | Stc1,20855:up                                                                                                                                                                                                                               |
| positive regulation of leukocyte mediated cytotoxicity          | GO:0001912 | 4.82E-01 | 5.65E-01 | Ccl2,20296:up                                                                                                                                                                                                                               |
| carbohydrate derivative transport                               | GO:1901264 | 4.82E-01 | 5.65E-01 | Slc29a1,63959:up                                                                                                                                                                                                                            |
| establishment of endothelial barrier                            | GO:0061028 | 4.82E-01 | 5.65E-01 | Tnf,21926:up                                                                                                                                                                                                                                |
| regulation of natural killer cell activation                    | GO:0032814 | 4.82E-01 | 5.65E-01 | Gas6,14456:up                                                                                                                                                                                                                               |
| cell part morphogenesis                                         | GO:0032990 | 4.84E-01 | 5.68E-01 | Flrt2,399558:down Lama2,16773:down Egfr,13649:down Plxnd1,67784:up Wnt5a,22418:down Sema7a,20361:down Tnfrsf12a,27279:down Crabp2,12904:down Ret,19713:up Cxcl12,20315:up Postn,50706:down Vegfa,22339:down Tgfb2,21808:down Fgfr2,14183:up |
| ribonucleoside biosynthetic process                             | GO:0042455 | 4.85E-01 | 5.68E-01 | Htr2a,15558:down Uck2,80914:down Igf1,16000:up                                                                                                                                                                                              |

|                                                                                  |            |          |          |                                                                                                                                                                                                                                                                                                                                                                                                                                                                                                                                                                                                                                                                                                                                                                                                                                                                                                                                                                                                                                                                                                                                                                                                                                                                                                                                                                                                                                                                                                                       |
|----------------------------------------------------------------------------------|------------|----------|----------|-----------------------------------------------------------------------------------------------------------------------------------------------------------------------------------------------------------------------------------------------------------------------------------------------------------------------------------------------------------------------------------------------------------------------------------------------------------------------------------------------------------------------------------------------------------------------------------------------------------------------------------------------------------------------------------------------------------------------------------------------------------------------------------------------------------------------------------------------------------------------------------------------------------------------------------------------------------------------------------------------------------------------------------------------------------------------------------------------------------------------------------------------------------------------------------------------------------------------------------------------------------------------------------------------------------------------------------------------------------------------------------------------------------------------------------------------------------------------------------------------------------------------|
| regulation of mitochondrion degradation                                          | GO:1903146 | 4.89E-01 | 5.73E-01 | Lmcd1,30937:up Plod2,26432:down Sfrp4,20379:up                                                                                                                                                                                                                                                                                                                                                                                                                                                                                                                                                                                                                                                                                                                                                                                                                                                                                                                                                                                                                                                                                                                                                                                                                                                                                                                                                                                                                                                                        |
| protein localization to plasma membrane                                          | GO:0072659 | 4.90E-01 | 5.74E-01 | Tnf,21926:up Gas6,14456:up Lrrc15,74488:down Adipoq,11450:up                                                                                                                                                                                                                                                                                                                                                                                                                                                                                                                                                                                                                                                                                                                                                                                                                                                                                                                                                                                                                                                                                                                                                                                                                                                                                                                                                                                                                                                          |
| nitrogen compound metabolic process                                              | GO:0006807 | 4.90E-01 | 5.74E-01 | Fstl3,83554:down Adm,11535:up Tfec,21426:up Sfrp4,20379:up Enpp5,83965:up Ankrd1,107765:down Ly1l,17095:up Gstt1,14871:up Blvrb,233016:up lgfbp3,16009:up Ggt5,23887:up Loxl2,94352:down Loxl3,16950:down Trf,22041:up Mme,17380:up Wnt5a,22418:down Maob,109731:up Adipoq,11450:up Bmp4,12159:up Hal,15109:up lgf1,16000:up Tgfb2,21808:down Ptgir,19222:up Fgfr2,14183:up Htr2b,15559:down Prl2c2,18811:up Efemp1,216616:up Vdr,22337:down Fabp4,11770:up Nabp1,109019:down Htr2a,15558:down Oas3,246727:up Slc40a1,53945:up Gas6,14456:up Egfr,13649:down Sfrp1,20377:up Tgfb3,21814:up Tfrc,22042:up Serinc2,230779:down Sfrp2,20319:up Gstm1,14862:up Npnt,114249:up S100a1,20193:up Ic1,218333:down Pdgfc,54635:down Ednrb,13618:up Ampd3,11717:up Mmp13,17386:up Epas1,13819:up Marc1,66112:up Htra3,78558:down Uchl5,56207:up Ddah1,69219:down Sdpr,20324:down Enpp3,209558:down Cdo1,12583:up Mamdc2,71738:down Ptx3,19288:up Akr1c18,105349:up Fabb5,16592:up Bmpr1a,12166:down Ccl4,20303:up Chst11,58250:down Gatm,67092:down Ret,19713:up Pdxk,216134:up Plpp3,67916:up Creb3l1,26427:down Kitl,17311:up P4ha1,18451:down Inhba,16323:down Rasl1a,68895:up Bnc2,2242509:down Ccl3,20302:up Vegfa,22339:down Gfpt2,14584:down Cbr2,12409:up lgf2,16002:up Anpep,16790:up Pparg,19016:up Tnf,21926:up Lmcd1,30937:up Glp1r,14652:down Fgfr1,14182:down Hmox1,15368:up Has2,15117:down Sulf1,240725:down Ptgs2,19225:down Grem1,23892:up Phf11d,219132:up Tbx15,21384:down Uck2,80914:down Enpp1,18605:down |
| cellular response to calcium ion                                                 | GO:0071277 | 4.91E-01 | 5.74E-01 | Akr1c18,105349:up                                                                                                                                                                                                                                                                                                                                                                                                                                                                                                                                                                                                                                                                                                                                                                                                                                                                                                                                                                                                                                                                                                                                                                                                                                                                                                                                                                                                                                                                                                     |
| glycerolipid catabolic process                                                   | GO:0046503 | 4.91E-01 | 5.74E-01 | Lpl,16956:up                                                                                                                                                                                                                                                                                                                                                                                                                                                                                                                                                                                                                                                                                                                                                                                                                                                                                                                                                                                                                                                                                                                                                                                                                                                                                                                                                                                                                                                                                                          |
| positive regulation of multicellular organism growth                             | GO:0040018 | 4.91E-01 | 5.74E-01 | lgf2,16002:up                                                                                                                                                                                                                                                                                                                                                                                                                                                                                                                                                                                                                                                                                                                                                                                                                                                                                                                                                                                                                                                                                                                                                                                                                                                                                                                                                                                                                                                                                                         |
| cholesterol efflux                                                               | GO:0033344 | 4.91E-01 | 5.74E-01 | Adipoq,11450:up                                                                                                                                                                                                                                                                                                                                                                                                                                                                                                                                                                                                                                                                                                                                                                                                                                                                                                                                                                                                                                                                                                                                                                                                                                                                                                                                                                                                                                                                                                       |
| positive regulation of cyclin-dependent protein serine/threonine kinase activity | GO:0045737 | 4.91E-01 | 5.74E-01 | Egfr,13649:down                                                                                                                                                                                                                                                                                                                                                                                                                                                                                                                                                                                                                                                                                                                                                                                                                                                                                                                                                                                                                                                                                                                                                                                                                                                                                                                                                                                                                                                                                                       |
| negative regulation of epithelial cell differentiation                           | GO:0030857 | 4.91E-01 | 5.74E-01 | Tgfb2,21808:down                                                                                                                                                                                                                                                                                                                                                                                                                                                                                                                                                                                                                                                                                                                                                                                                                                                                                                                                                                                                                                                                                                                                                                                                                                                                                                                                                                                                                                                                                                      |
| negative regulation of axon extension                                            | GO:0030517 | 4.91E-01 | 5.74E-01 | Wnt5a,22418:down                                                                                                                                                                                                                                                                                                                                                                                                                                                                                                                                                                                                                                                                                                                                                                                                                                                                                                                                                                                                                                                                                                                                                                                                                                                                                                                                                                                                                                                                                                      |
| regulation of glycoprotein biosynthetic process                                  | GO:0010559 | 4.91E-01 | 5.74E-01 | lgf1,16000:up                                                                                                                                                                                                                                                                                                                                                                                                                                                                                                                                                                                                                                                                                                                                                                                                                                                                                                                                                                                                                                                                                                                                                                                                                                                                                                                                                                                                                                                                                                         |
| striated muscle adaptation                                                       | GO:0014888 | 4.91E-01 | 5.74E-01 | Errf1,74155:down                                                                                                                                                                                                                                                                                                                                                                                                                                                                                                                                                                                                                                                                                                                                                                                                                                                                                                                                                                                                                                                                                                                                                                                                                                                                                                                                                                                                                                                                                                      |
| regulation of receptor activity                                                  | GO:0010469 | 4.92E-01 | 5.75E-01 | Errf1,74155:down Grem1,23892:up                                                                                                                                                                                                                                                                                                                                                                                                                                                                                                                                                                                                                                                                                                                                                                                                                                                                                                                                                                                                                                                                                                                                                                                                                                                                                                                                                                                                                                                                                       |
| blastocyst development                                                           | GO:0001824 | 4.92E-01 | 5.75E-01 | Tgfb3,21814:up lgf1,16000:up                                                                                                                                                                                                                                                                                                                                                                                                                                                                                                                                                                                                                                                                                                                                                                                                                                                                                                                                                                                                                                                                                                                                                                                                                                                                                                                                                                                                                                                                                          |
| nucleoside biosynthetic process                                                  | GO:0009163 | 4.94E-01 | 5.77E-01 | Htr2a,15558:down Uck2,80914:down lgf1,16000:up                                                                                                                                                                                                                                                                                                                                                                                                                                                                                                                                                                                                                                                                                                                                                                                                                                                                                                                                                                                                                                                                                                                                                                                                                                                                                                                                                                                                                                                                        |
| regulation of protein catabolic process                                          | GO:0042176 | 4.94E-01 | 5.77E-01 | Uchl5,56207:up Tnf,21926:up Plk2,20620:down Egfr,13649:down Wnt5a,22418:down Serpine2,20720:up                                                                                                                                                                                                                                                                                                                                                                                                                                                                                                                                                                                                                                                                                                                                                                                                                                                                                                                                                                                                                                                                                                                                                                                                                                                                                                                                                                                                                        |
| ATP biosynthetic process                                                         | GO:0006754 | 4.98E-01 | 5.81E-01 | Htr2a,15558:down lgf1,16000:up                                                                                                                                                                                                                                                                                                                                                                                                                                                                                                                                                                                                                                                                                                                                                                                                                                                                                                                                                                                                                                                                                                                                                                                                                                                                                                                                                                                                                                                                                        |
| mitotic cell cycle checkpoint                                                    | GO:0007093 | 4.98E-01 | 5.81E-01 | Plk2,20620:down Nabp1,109019:down                                                                                                                                                                                                                                                                                                                                                                                                                                                                                                                                                                                                                                                                                                                                                                                                                                                                                                                                                                                                                                                                                                                                                                                                                                                                                                                                                                                                                                                                                     |
| cellular response to glucose stimulus                                            | GO:0071333 | 4.98E-01 | 5.81E-01 | Gas6,14456:up lgf1,16000:up                                                                                                                                                                                                                                                                                                                                                                                                                                                                                                                                                                                                                                                                                                                                                                                                                                                                                                                                                                                                                                                                                                                                                                                                                                                                                                                                                                                                                                                                                           |
| negative regulation of endocytosis                                               | GO:0045806 | 5.01E-01 | 5.83E-01 | Adipoq,11450:up                                                                                                                                                                                                                                                                                                                                                                                                                                                                                                                                                                                                                                                                                                                                                                                                                                                                                                                                                                                                                                                                                                                                                                                                                                                                                                                                                                                                                                                                                                       |
| positive regulation of B cell proliferation                                      | GO:0030890 | 5.01E-01 | 5.83E-01 | Tfrc,22042:up                                                                                                                                                                                                                                                                                                                                                                                                                                                                                                                                                                                                                                                                                                                                                                                                                                                                                                                                                                                                                                                                                                                                                                                                                                                                                                                                                                                                                                                                                                         |
| photoreceptor cell development                                                   | GO:0042461 | 5.01E-01 | 5.83E-01 | Vegfa,22339:down                                                                                                                                                                                                                                                                                                                                                                                                                                                                                                                                                                                                                                                                                                                                                                                                                                                                                                                                                                                                                                                                                                                                                                                                                                                                                                                                                                                                                                                                                                      |
| positive regulation of cyclin-dependent protein kinase activity                  | GO:1904031 | 5.01E-01 | 5.83E-01 | Egfr,13649:down                                                                                                                                                                                                                                                                                                                                                                                                                                                                                                                                                                                                                                                                                                                                                                                                                                                                                                                                                                                                                                                                                                                                                                                                                                                                                                                                                                                                                                                                                                       |
| response to exogenous dsRNA                                                      | GO:0043330 | 5.01E-01 | 5.83E-01 | Ifit1,15957:up                                                                                                                                                                                                                                                                                                                                                                                                                                                                                                                                                                                                                                                                                                                                                                                                                                                                                                                                                                                                                                                                                                                                                                                                                                                                                                                                                                                                                                                                                                        |
| negative regulation of Ras protein signal transduction                           | GO:0046580 | 5.01E-01 | 5.83E-01 | Tgfb2,21808:down                                                                                                                                                                                                                                                                                                                                                                                                                                                                                                                                                                                                                                                                                                                                                                                                                                                                                                                                                                                                                                                                                                                                                                                                                                                                                                                                                                                                                                                                                                      |
| regulation of CD4-positive, alpha-beta T cell activation                         | GO:2000514 | 5.01E-01 | 5.83E-01 | Ceacam1,26365:up                                                                                                                                                                                                                                                                                                                                                                                                                                                                                                                                                                                                                                                                                                                                                                                                                                                                                                                                                                                                                                                                                                                                                                                                                                                                                                                                                                                                                                                                                                      |
| reproductive behavior                                                            | GO:0019098 | 5.01E-01 | 5.83E-01 | Serpine2,20720:up                                                                                                                                                                                                                                                                                                                                                                                                                                                                                                                                                                                                                                                                                                                                                                                                                                                                                                                                                                                                                                                                                                                                                                                                                                                                                                                                                                                                                                                                                                     |
| multi-organism reproductive behavior                                             | GO:0044705 | 5.01E-01 | 5.83E-01 | Serpine2,20720:up                                                                                                                                                                                                                                                                                                                                                                                                                                                                                                                                                                                                                                                                                                                                                                                                                                                                                                                                                                                                                                                                                                                                                                                                                                                                                                                                                                                                                                                                                                     |

|                                                                             |            |          |          |                                                                                                                                                                                                                                                                                                                                                                                                     |
|-----------------------------------------------------------------------------|------------|----------|----------|-----------------------------------------------------------------------------------------------------------------------------------------------------------------------------------------------------------------------------------------------------------------------------------------------------------------------------------------------------------------------------------------------------|
| response to pH                                                              | GO:0009268 | 5.01E-01 | 5.83E-01 | Hvcn1,74096:up                                                                                                                                                                                                                                                                                                                                                                                      |
| positive regulation of response to biotic stimulus                          | GO:0002833 | 5.01E-01 | 5.83E-01 | Cd24a,12484:down                                                                                                                                                                                                                                                                                                                                                                                    |
| regulation of granulocyte chemotaxis                                        | GO:0071622 | 5.01E-01 | 5.83E-01 | Ccl2,20296:up                                                                                                                                                                                                                                                                                                                                                                                       |
| regulation of digestive system process                                      | GO:0044058 | 5.01E-01 | 5.83E-01 | Mmp13,17386:up                                                                                                                                                                                                                                                                                                                                                                                      |
| glycosyl compound biosynthetic process                                      | GO:1901659 | 5.03E-01 | 5.85E-01 | Htr2a,15558:down Uck2,80914:down lgf1,16000:up                                                                                                                                                                                                                                                                                                                                                      |
| protein folding                                                             | GO:0006457 | 5.03E-01 | 5.85E-01 | Pdia5,72599:down Fkbp10,14230:down Fkbp14,231997:down                                                                                                                                                                                                                                                                                                                                               |
| regulation of insulin secretion                                             | GO:0050796 | 5.07E-01 | 5.90E-01 | Tnf,21926:up Glp1r,14652:down Sfrp1,20377:up                                                                                                                                                                                                                                                                                                                                                        |
| cellular response to monosaccharide stimulus                                | GO:0071326 | 5.09E-01 | 5.91E-01 | Gas6,14456:up lgf1,16000:up                                                                                                                                                                                                                                                                                                                                                                         |
| cellular response to hexose stimulus                                        | GO:0071331 | 5.09E-01 | 5.91E-01 | Gas6,14456:up lgf1,16000:up                                                                                                                                                                                                                                                                                                                                                                         |
| fatty acid oxidation                                                        | GO:0019395 | 5.09E-01 | 5.91E-01 | Pparg,19016:up Adipoq,11450:up                                                                                                                                                                                                                                                                                                                                                                      |
| regulation of erythrocyte differentiation                                   | GO:0045646 | 5.10E-01 | 5.91E-01 | Inhba,16323:down                                                                                                                                                                                                                                                                                                                                                                                    |
| regulation of phosphoprotein phosphatase activity                           | GO:0043666 | 5.10E-01 | 5.91E-01 | Tnf,21926:up                                                                                                                                                                                                                                                                                                                                                                                        |
| negative regulation of small GTPase mediated signal transduction            | GO:0051058 | 5.10E-01 | 5.91E-01 | Tgfb2,21808:down                                                                                                                                                                                                                                                                                                                                                                                    |
| negative regulation of mitochondrion organization                           | GO:0010823 | 5.10E-01 | 5.91E-01 | lgf1,16000:up                                                                                                                                                                                                                                                                                                                                                                                       |
| positive regulation of sodium ion transport                                 | GO:0010765 | 5.10E-01 | 5.91E-01 | Fxyd1,56188:up                                                                                                                                                                                                                                                                                                                                                                                      |
| cellular response to xenobiotic stimulus                                    | GO:0071466 | 5.10E-01 | 5.91E-01 | Gstt1,14871:up                                                                                                                                                                                                                                                                                                                                                                                      |
| negative regulation of cell cycle G1/S phase transition                     | GO:1902807 | 5.10E-01 | 5.91E-01 | Susd2,71733:up                                                                                                                                                                                                                                                                                                                                                                                      |
| negative regulation of response to extracellular stimulus                   | GO:0032105 | 5.10E-01 | 5.91E-01 | Hmox1,15368:up                                                                                                                                                                                                                                                                                                                                                                                      |
| negative regulation of response to nutrient levels                          | GO:0032108 | 5.10E-01 | 5.91E-01 | Hmox1,15368:up                                                                                                                                                                                                                                                                                                                                                                                      |
| adult behavior                                                              | GO:0030534 | 5.12E-01 | 5.93E-01 | Cxcl12,20315:up Htr2a,15558:down Sncg,20618:up                                                                                                                                                                                                                                                                                                                                                      |
| B cell activation                                                           | GO:0042113 | 5.13E-01 | 5.95E-01 | Cd24a,12484:down Lyl1,17095:up Sfrp1,20377:up Tfrc,22042:up                                                                                                                                                                                                                                                                                                                                         |
| negative regulation of cellular catabolic process                           | GO:0031330 | 5.16E-01 | 5.98E-01 | Htr2b,15559:down Hp,15439:up Hmox1,15368:up                                                                                                                                                                                                                                                                                                                                                         |
| negative regulation of cell cycle process                                   | GO:0010948 | 5.16E-01 | 5.98E-01 | Susd2,71733:up Fgfr2,14183:up Bmp4,12159:up                                                                                                                                                                                                                                                                                                                                                         |
| cellular protein localization                                               | GO:0034613 | 5.17E-01 | 5.98E-01 | Ice1,218333:down Ccl2,20296:up Gpm6b,14758:up Htr2a,15558:down Lrrc15,74488:down Kdelr3,105785:down Gas6,14456:up Tnf,21926:up Akr1c18,105349:up Cd24a,12484:down Egfr,13649:down Sec23a,20334:down C1qtnf3,81799:down Wnt5a,22418:down Cd4,12504:up Bmpr1a,12166:down Ptgs2,19225:down Grem1,23892:up Adipoq,11450:up Bmp4,12159:up lgf1,16000:up Ceacam1,26365:up Sfrp2,20319:up Tgfb2,21808:down |
| regulation of mast cell activation                                          | GO:0033003 | 5.18E-01 | 5.98E-01 | Hmox1,15368:up                                                                                                                                                                                                                                                                                                                                                                                      |
| regulation of meiotic cell cycle                                            | GO:0051445 | 5.18E-01 | 5.98E-01 | Wnt5a,22418:down                                                                                                                                                                                                                                                                                                                                                                                    |
| heterophilic cell-cell adhesion via plasma membrane cell adhesion molecules | GO:0007157 | 5.18E-01 | 5.98E-01 | Cd24a,12484:down                                                                                                                                                                                                                                                                                                                                                                                    |
| regulation of gene silencing                                                | GO:0060968 | 5.18E-01 | 5.98E-01 | Egfr,13649:down                                                                                                                                                                                                                                                                                                                                                                                     |
| fibroblast migration                                                        | GO:0010761 | 5.18E-01 | 5.98E-01 | Fgfr1,14182:down                                                                                                                                                                                                                                                                                                                                                                                    |
| regulation of centrosome cycle                                              | GO:0046605 | 5.18E-01 | 5.98E-01 | Plk2,20620:down                                                                                                                                                                                                                                                                                                                                                                                     |
| cell fate determination                                                     | GO:0001709 | 5.18E-01 | 5.98E-01 | Bmp4,12159:up                                                                                                                                                                                                                                                                                                                                                                                       |
| regulation of leukocyte degranulation                                       | GO:0043300 | 5.18E-01 | 5.98E-01 | Hmox1,15368:up                                                                                                                                                                                                                                                                                                                                                                                      |

|                                                                      |            |          |          |                                                                                                                                                                                                                                                                                                                                                                                                     |
|----------------------------------------------------------------------|------------|----------|----------|-----------------------------------------------------------------------------------------------------------------------------------------------------------------------------------------------------------------------------------------------------------------------------------------------------------------------------------------------------------------------------------------------------|
| negative regulation of DNA replication                               | GO:0008156 | 5.18E-01 | 5.98E-01 | Pparg,19016:up                                                                                                                                                                                                                                                                                                                                                                                      |
| regulation of NIK/NF-kappaB signaling                                | GO:1901222 | 5.18E-01 | 5.98E-01 | Tnf,21926:up                                                                                                                                                                                                                                                                                                                                                                                        |
| clathrin-mediated endocytosis                                        | GO:0072583 | 5.18E-01 | 5.98E-01 | Cd24a,12484:down                                                                                                                                                                                                                                                                                                                                                                                    |
| spleen development                                                   | GO:0048536 | 5.18E-01 | 5.98E-01 | Slc40a1,53945:up                                                                                                                                                                                                                                                                                                                                                                                    |
| regulation of release of cytochrome c from mitochondria              | GO:0090199 | 5.18E-01 | 5.98E-01 | Igf1,16000:up                                                                                                                                                                                                                                                                                                                                                                                       |
| arachidonic acid metabolic process                                   | GO:0019369 | 5.18E-01 | 5.98E-01 | Ptgs2,19225:down                                                                                                                                                                                                                                                                                                                                                                                    |
| positive regulation of macroautophagy                                | GO:0016239 | 5.18E-01 | 5.98E-01 | Hmox1,15368:up                                                                                                                                                                                                                                                                                                                                                                                      |
| oocyte development                                                   | GO:0048599 | 5.18E-01 | 5.98E-01 | Igf1,16000:up                                                                                                                                                                                                                                                                                                                                                                                       |
| regulation of triglyceride metabolic process                         | GO:0090207 | 5.18E-01 | 5.98E-01 | C3,12266:up                                                                                                                                                                                                                                                                                                                                                                                         |
| negative regulation of gliogenesis                                   | GO:0014014 | 5.18E-01 | 5.98E-01 | Bmp4,12159:up                                                                                                                                                                                                                                                                                                                                                                                       |
| acylglycerol metabolic process                                       | GO:0006639 | 5.20E-01 | 6.00E-01 | Lpl,16956:up C3,12266:up                                                                                                                                                                                                                                                                                                                                                                            |
| adult locomotory behavior                                            | GO:0008344 | 5.20E-01 | 6.00E-01 | Cxcl12,20315:up Sncg,20618:up                                                                                                                                                                                                                                                                                                                                                                       |
| response to topologically incorrect protein                          | GO:0035966 | 5.20E-01 | 6.00E-01 | Sdf2l1,64136:up Creb3l1,26427:down                                                                                                                                                                                                                                                                                                                                                                  |
| cAMP biosynthetic process                                            | GO:0006171 | 5.20E-01 | 6.00E-01 | Adm,11535:up Ptgir,19222:up                                                                                                                                                                                                                                                                                                                                                                         |
| lipid oxidation                                                      | GO:0034440 | 5.20E-01 | 6.00E-01 | Pparg,19016:up Adipoq,11450:up                                                                                                                                                                                                                                                                                                                                                                      |
| neurotransmitter transport                                           | GO:0006836 | 5.21E-01 | 6.00E-01 | Gpm6b,14758:up Sytn11,80976:up Sncg,20618:up                                                                                                                                                                                                                                                                                                                                                        |
| positive regulation of innate immune response                        | GO:0045089 | 5.21E-01 | 6.00E-01 | Tnf,21926:up Wnt5a,22418:down Mmp2,17390:down                                                                                                                                                                                                                                                                                                                                                       |
| ribonucleoside metabolic process                                     | GO:0009119 | 5.21E-01 | 6.00E-01 | Htr2a,15558:down Uck2,80914:down Enpp1,18605:down Ampd3,11717:up Igf1,16000:up                                                                                                                                                                                                                                                                                                                      |
| single-organism intracellular transport                              | GO:1902582 | 5.22E-01 | 6.01E-01 | Htr2b,15559:down Ccl2,20296:up Htr2a,15558:down Gas6,14456:up Tnf,21926:up Akr1c18,105349:up Gp1r,14652:down Cd24a,12484:down Egfr,13649:down Fgfr1,14182:down Sec23a,20334:down Hmox1,15368:up C1qtnf3,81799:down Cd4,12504:up Bmpr1a,12166:down Ptgs2,19225:down Grem1,23892:up Bmp4,12159:up Igf1,16000:up Ceacam1,26365:up Sfrp2,20319:up Tgfb2,21808:down                                      |
| apoptotic mitochondrial changes                                      | GO:0008637 | 5.26E-01 | 6.06E-01 | Cd24a,12484:down Igf1,16000:up                                                                                                                                                                                                                                                                                                                                                                      |
| eye photoreceptor cell differentiation                               | GO:0001754 | 5.27E-01 | 6.06E-01 | Vegfa,22339:down                                                                                                                                                                                                                                                                                                                                                                                    |
| pigment biosynthetic process                                         | GO:0046148 | 5.27E-01 | 6.06E-01 | Wnt5a,22418:down                                                                                                                                                                                                                                                                                                                                                                                    |
| protein O-linked glycosylation                                       | GO:0006493 | 5.27E-01 | 6.06E-01 | Vegfb,22340:up                                                                                                                                                                                                                                                                                                                                                                                      |
| negative regulation of response to oxidative stress                  | GO:1902883 | 5.27E-01 | 6.06E-01 | Hp,15439:up                                                                                                                                                                                                                                                                                                                                                                                         |
| genitalia development                                                | GO:0048806 | 5.27E-01 | 6.06E-01 | Wnt5a,22418:down                                                                                                                                                                                                                                                                                                                                                                                    |
| negative regulation of cellular response to oxidative stress         | GO:1900408 | 5.27E-01 | 6.06E-01 | Hp,15439:up                                                                                                                                                                                                                                                                                                                                                                                         |
| neutral lipid metabolic process                                      | GO:0006638 | 5.32E-01 | 6.11E-01 | Lpl,16956:up C3,12266:up                                                                                                                                                                                                                                                                                                                                                                            |
| negative regulation of transcription from RNA polymerase II promoter | GO:0000122 | 5.32E-01 | 6.11E-01 | Tnf,21926:up Pparg,19016:up Lmcd1,30937:up Fgfr1,14182:down Ednrb,13618:up Epas1,13819:up Bmp4,12159:up Ankrd1,107765:down Vdr,22337:down Vegfa,22339:down Fgfr2,14183:up S100a1,20193:up                                                                                                                                                                                                           |
| cellular macromolecule localization                                  | GO:0070727 | 5.34E-01 | 6.13E-01 | Ice1,218333:down Ccl2,20296:up Gpm6b,14758:up Htr2a,15558:down Lrrc15,74488:down Kdelr3,105785:down Gas6,14456:up Tnf,21926:up Akr1c18,105349:up Cd24a,12484:down Egfr,13649:down Sec23a,20334:down C1qtnf3,81799:down Wnt5a,22418:down Cd4,12504:up Bmpr1a,12166:down Ptgs2,19225:down Grem1,23892:up Adipoq,11450:up Bmp4,12159:up Igf1,16000:up Ceacam1,26365:up Sfrp2,20319:up Tgfb2,21808:down |
| necrotic cell death                                                  | GO:0070265 | 5.36E-01 | 6.13E-01 | Tnf,21926:up                                                                                                                                                                                                                                                                                                                                                                                        |
| isotype switching                                                    | GO:0045190 | 5.36E-01 | 6.13E-01 | Tfrc,22042:up                                                                                                                                                                                                                                                                                                                                                                                       |
| regulation of action potential                                       | GO:0098900 | 5.36E-01 | 6.13E-01 | Tnf,21926:up                                                                                                                                                                                                                                                                                                                                                                                        |
| negative regulation of cell-substrate adhesion                       | GO:0010812 | 5.36E-01 | 6.13E-01 | Postn,50706:down                                                                                                                                                                                                                                                                                                                                                                                    |

|                                                                           |            |          |          |                                                                                                                                                                                                             |
|---------------------------------------------------------------------------|------------|----------|----------|-------------------------------------------------------------------------------------------------------------------------------------------------------------------------------------------------------------|
| cerebellum morphogenesis                                                  | GO:0021587 | 5.36E-01 | 6.13E-01 | Serpine2,20720:up                                                                                                                                                                                           |
| somatic diversification of immunoglobulins involved in immune response    | GO:0002208 | 5.36E-01 | 6.13E-01 | Tfrc,22042:up                                                                                                                                                                                               |
| cellular senescence                                                       | GO:0090398 | 5.36E-01 | 6.13E-01 | Bmpr1a,12166:down                                                                                                                                                                                           |
| apical junction assembly                                                  | GO:0043297 | 5.36E-01 | 6.13E-01 | Tnf,21926:up                                                                                                                                                                                                |
| negative regulation of striated muscle tissue development                 | GO:0045843 | 5.36E-01 | 6.13E-01 | Bmp4,12159:up                                                                                                                                                                                               |
| positive regulation of amine transport                                    | GO:0051954 | 5.36E-01 | 6.13E-01 | Cxcl12,20315:up                                                                                                                                                                                             |
| somatic recombination of immunoglobulin genes involved in immune response | GO:0002204 | 5.36E-01 | 6.13E-01 | Tfrc,22042:up                                                                                                                                                                                               |
| regulation of interleukin-12 production                                   | GO:0032655 | 5.36E-01 | 6.13E-01 | Tnfsf9,21950:up                                                                                                                                                                                             |
| filopodium assembly                                                       | GO:0046847 | 5.36E-01 | 6.13E-01 | Dpysl3,22240:down                                                                                                                                                                                           |
| mast cell degranulation                                                   | GO:0043303 | 5.36E-01 | 6.13E-01 | Hmox1,15368:up                                                                                                                                                                                              |
| mast cell activation involved in immune response                          | GO:0002279 | 5.36E-01 | 6.13E-01 | Hmox1,15368:up                                                                                                                                                                                              |
| negative regulation of insulin secretion                                  | GO:0046676 | 5.36E-01 | 6.13E-01 | Sfrp1,20377:up                                                                                                                                                                                              |
| actin cytoskeleton organization                                           | GO:0030036 | 5.36E-01 | 6.13E-01 | Fam101b,76566:down Tnf,21926:up Trf,22041:up Sfrp1,20377:up Ptk7,71461:down Dpysl3,22240:down Gpm6b,14758:up Shroom4,208431:down Tgfb2,21808:down                                                           |
| positive regulation of peptide hormone secretion                          | GO:0090277 | 5.37E-01 | 6.14E-01 | Glp1r,14652:down Egfr,13649:down                                                                                                                                                                            |
| DNA-dependent DNA replication                                             | GO:0006261 | 5.37E-01 | 6.14E-01 | Fgfr1,14182:down Bmp4,12159:up                                                                                                                                                                              |
| phosphatidylinositol metabolic process                                    | GO:0046488 | 5.42E-01 | 6.20E-01 | Htr2b,15559:down Htr2a,15558:down                                                                                                                                                                           |
| cellular response to carbohydrate stimulus                                | GO:0071322 | 5.42E-01 | 6.20E-01 | Gas6,14456:up Igf1,16000:up                                                                                                                                                                                 |
| locomotory behavior                                                       | GO:0007626 | 5.43E-01 | 6.21E-01 | Mcoln3,171166:up Cxcl12,20315:up Aldh1a3,56847:down Sncg,20618:up                                                                                                                                           |
| viral gene expression                                                     | GO:0019080 | 5.44E-01 | 6.21E-01 | Ccl4,20303:up                                                                                                                                                                                               |
| oocyte differentiation                                                    | GO:0009994 | 5.44E-01 | 6.21E-01 | Igf1,16000:up                                                                                                                                                                                               |
| long-chain fatty acid transport                                           | GO:0015909 | 5.44E-01 | 6.21E-01 | Pparg,19016:up                                                                                                                                                                                              |
| neural tube patterning                                                    | GO:0021532 | 5.44E-01 | 6.21E-01 | Bmp4,12159:up                                                                                                                                                                                               |
| NIK/NF-kappaB signaling                                                   | GO:0038061 | 5.44E-01 | 6.21E-01 | Tnf,21926:up                                                                                                                                                                                                |
| mast cell mediated immunity                                               | GO:0002448 | 5.44E-01 | 6.21E-01 | Hmox1,15368:up                                                                                                                                                                                              |
| positive regulation of cell killing                                       | GO:0031343 | 5.44E-01 | 6.21E-01 | Ccl2,20296:up                                                                                                                                                                                               |
| positive regulation of DNA binding                                        | GO:0043388 | 5.44E-01 | 6.21E-01 | Igf1,16000:up                                                                                                                                                                                               |
| regulation of cAMP metabolic process                                      | GO:0030814 | 5.48E-01 | 6.25E-01 | Adm,11535:up Ptgir,19222:up                                                                                                                                                                                 |
| multi-organism reproductive process                                       | GO:0044703 | 5.49E-01 | 6.25E-01 | Akr1c18,105349:up Hpgd,15446:up Inhba,16323:down Ptgs2,19225:down Ednrb,13618:up Plat,18791:down Igf1,16000:up Bmp4,12159:up Vdr,22337:down Cxcl12,20315:up Mmp2,17390:down Serpine2,20720:up Kitl,17311:up |
| multicellular organism growth                                             | GO:0035264 | 5.51E-01 | 6.28E-01 | Igf2,16002:up Fgfr2,14183:up Igf1,16000:up                                                                                                                                                                  |
| phospholipid metabolic process                                            | GO:0006644 | 5.51E-01 | 6.28E-01 | Htr2b,15559:down Fabp5,16592:up Htr2a,15558:down Plpp3,67916:up Serinc2,230779:down                                                                                                                         |
| water homeostasis                                                         | GO:0030104 | 5.52E-01 | 6.28E-01 | Igf1,16000:up                                                                                                                                                                                               |
| negative regulation of muscle organ development                           | GO:0048635 | 5.52E-01 | 6.28E-01 | Bmp4,12159:up                                                                                                                                                                                               |
| pyrimidine-containing compound metabolic process                          | GO:0072527 | 5.52E-01 | 6.28E-01 | Uck2,80914:down                                                                                                                                                                                             |
| negative regulation of response to DNA damage stimulus                    | GO:2001021 | 5.52E-01 | 6.28E-01 | Cxcl12,20315:up                                                                                                                                                                                             |

|                                                                               |            |          |          |                                                                                |
|-------------------------------------------------------------------------------|------------|----------|----------|--------------------------------------------------------------------------------|
| regulation of T cell mediated immunity                                        | GO:0002709 | 5.52E-01 | 6.28E-01 | Cd24a,12484:down                                                               |
| NAD metabolic process                                                         | GO:0019674 | 5.52E-01 | 6.28E-01 | Cbr2,12409:up                                                                  |
| positive regulation of dephosphorylation                                      | GO:0035306 | 5.52E-01 | 6.28E-01 | Npnt,114249:up                                                                 |
| purine ribonucleoside triphosphate biosynthetic process                       | GO:0009206 | 5.53E-01 | 6.29E-01 | Htr2a,15558:down lgf1,16000:up                                                 |
| establishment of vesicle localization                                         | GO:0051650 | 5.55E-01 | 6.31E-01 | Cd24a,12484:down Synt13,80976:up Fgfr2,14183:up                                |
| purine nucleoside triphosphate biosynthetic process                           | GO:0009145 | 5.59E-01 | 6.35E-01 | Htr2a,15558:down lgf1,16000:up                                                 |
| regulation of cyclic nucleotide biosynthetic process                          | GO:0030802 | 5.59E-01 | 6.35E-01 | Adm,11535:up Ptgir,19222:up                                                    |
| positive regulation of peptide secretion                                      | GO:0002793 | 5.59E-01 | 6.35E-01 | Glp1r,14652:down Egfr,13649:down                                               |
| negative regulation of muscle tissue development                              | GO:1901862 | 5.61E-01 | 6.36E-01 | Bmp4,12159:up                                                                  |
| positive regulation of response to nutrient levels                            | GO:0032109 | 5.61E-01 | 6.36E-01 | Hmox1,15368:up                                                                 |
| interleukin-12 production                                                     | GO:0032615 | 5.61E-01 | 6.36E-01 | Tnfsf9,21950:up                                                                |
| response to xenobiotic stimulus                                               | GO:0009410 | 5.61E-01 | 6.36E-01 | Gstt1,14871:up                                                                 |
| T-helper cell differentiation                                                 | GO:0042093 | 5.61E-01 | 6.36E-01 | Ly9,17085:up                                                                   |
| positive regulation of response to extracellular stimulus                     | GO:0032106 | 5.61E-01 | 6.36E-01 | Hmox1,15368:up                                                                 |
| germ cell development                                                         | GO:0007281 | 5.62E-01 | 6.37E-01 | Cxcl12,20315:up Kitl,17311:up lgf1,16000:up Bmp4,12159:up                      |
| positive regulation of protein catabolic process                              | GO:0045732 | 5.64E-01 | 6.39E-01 | Tnf,21926:up Plk2,20620:down Wnt5a,22418:down                                  |
| cellular glucose homeostasis                                                  | GO:0001678 | 5.64E-01 | 6.39E-01 | Gas6,14456:up lgf1,16000:up                                                    |
| ribonucleoside triphosphate biosynthetic process                              | GO:0009201 | 5.64E-01 | 6.39E-01 | Htr2a,15558:down lgf1,16000:up                                                 |
| myelination                                                                   | GO:0042552 | 5.64E-01 | 6.39E-01 | Tnf,21926:up Trf,22041:up                                                      |
| nucleoside metabolic process                                                  | GO:0009116 | 5.64E-01 | 6.39E-01 | Htr2a,15558:down Uck2,80914:down Enpp1,18605:down Ampd3,11717:up lgf1,16000:up |
| regulation of interleukin-2 production                                        | GO:0032663 | 5.69E-01 | 6.43E-01 | Ceacam1,26365:up                                                               |
| somatic stem cell maintenance                                                 | GO:0035019 | 5.69E-01 | 6.43E-01 | Sfrp1,20377:up                                                                 |
| hindbrain morphogenesis                                                       | GO:0021575 | 5.69E-01 | 6.43E-01 | Serpine2,20720:up                                                              |
| CD4-positive, alpha-beta T cell differentiation involved in immune response   | GO:0002294 | 5.69E-01 | 6.43E-01 | Ly9,17085:up                                                                   |
| regulation of signal transduction by p53 class mediator                       | GO:1901796 | 5.69E-01 | 6.43E-01 | Ankrd1,107765:down                                                             |
| maintenance of protein location in cell                                       | GO:0032507 | 5.69E-01 | 6.44E-01 | Kdelr3,105785:down Cd4,12504:up                                                |
| axon ensheathment                                                             | GO:0008366 | 5.74E-01 | 6.49E-01 | Tnf,21926:up Trf,22041:up                                                      |
| ensheathment of neurons                                                       | GO:0007272 | 5.74E-01 | 6.49E-01 | Tnf,21926:up Trf,22041:up                                                      |
| cellular response to reactive oxygen species                                  | GO:0034614 | 5.74E-01 | 6.49E-01 | Tnf,21926:up Akr1c18,105349:up                                                 |
| immunoglobulin production involved in immunoglobulin mediated immune response | GO:0002381 | 5.76E-01 | 6.51E-01 | Tfrc,22042:up                                                                  |
| alpha-beta T cell activation involved in immune response                      | GO:0002287 | 5.76E-01 | 6.51E-01 | Ly9,17085:up                                                                   |

|                                                                        |            |          |          |                                                                                                                                                                                                                                                                                                                                                                                                                                                                                                                                                                                                                                                                                                                                                                                                                                                                                                                                                                                                                                                                                           |
|------------------------------------------------------------------------|------------|----------|----------|-------------------------------------------------------------------------------------------------------------------------------------------------------------------------------------------------------------------------------------------------------------------------------------------------------------------------------------------------------------------------------------------------------------------------------------------------------------------------------------------------------------------------------------------------------------------------------------------------------------------------------------------------------------------------------------------------------------------------------------------------------------------------------------------------------------------------------------------------------------------------------------------------------------------------------------------------------------------------------------------------------------------------------------------------------------------------------------------|
| somatic recombination of immunoglobulin gene segments                  | GO:0016447 | 5.76E-01 | 6.51E-01 | Tfrc,22042:up                                                                                                                                                                                                                                                                                                                                                                                                                                                                                                                                                                                                                                                                                                                                                                                                                                                                                                                                                                                                                                                                             |
| alpha-beta T cell differentiation involved in immune response          | GO:0022293 | 5.76E-01 | 6.51E-01 | Ly9,17085:up                                                                                                                                                                                                                                                                                                                                                                                                                                                                                                                                                                                                                                                                                                                                                                                                                                                                                                                                                                                                                                                                              |
| membrane invagination                                                  | GO:0010324 | 5.76E-01 | 6.51E-01 | Pparg,19016:up                                                                                                                                                                                                                                                                                                                                                                                                                                                                                                                                                                                                                                                                                                                                                                                                                                                                                                                                                                                                                                                                            |
| digestion                                                              | GO:0007586 | 5.79E-01 | 6.54E-01 | Vdr,22337:down Mmp13,17386:up                                                                                                                                                                                                                                                                                                                                                                                                                                                                                                                                                                                                                                                                                                                                                                                                                                                                                                                                                                                                                                                             |
| establishment of protein localization to membrane                      | GO:0090150 | 5.80E-01 | 6.54E-01 | Tnf,21926:up Gas6,14456:up Ccl2,20296:up Lrrc15,74488:down                                                                                                                                                                                                                                                                                                                                                                                                                                                                                                                                                                                                                                                                                                                                                                                                                                                                                                                                                                                                                                |
| cellular lipid catabolic process                                       | GO:0044242 | 5.80E-01 | 6.54E-01 | Akr1c18,105349:up Lpl,16956:up Adipoq,11450:up                                                                                                                                                                                                                                                                                                                                                                                                                                                                                                                                                                                                                                                                                                                                                                                                                                                                                                                                                                                                                                            |
| vesicle docking                                                        | GO:0048278 | 5.84E-01 | 6.58E-01 | Ncam1,17967:down                                                                                                                                                                                                                                                                                                                                                                                                                                                                                                                                                                                                                                                                                                                                                                                                                                                                                                                                                                                                                                                                          |
| regulation of establishment of protein localization to plasma membrane | GO:0090003 | 5.84E-01 | 6.58E-01 | Lrrc15,74488:down                                                                                                                                                                                                                                                                                                                                                                                                                                                                                                                                                                                                                                                                                                                                                                                                                                                                                                                                                                                                                                                                         |
| gene silencing by miRNA                                                | GO:0035195 | 5.84E-01 | 6.58E-01 | Egfr,13649:down                                                                                                                                                                                                                                                                                                                                                                                                                                                                                                                                                                                                                                                                                                                                                                                                                                                                                                                                                                                                                                                                           |
| determination of left/right symmetry                                   | GO:0007368 | 5.84E-01 | 6.58E-01 | Wnt5a,22418:down Aldh1a2,19378:up                                                                                                                                                                                                                                                                                                                                                                                                                                                                                                                                                                                                                                                                                                                                                                                                                                                                                                                                                                                                                                                         |
| ATP metabolic process                                                  | GO:0046034 | 5.84E-01 | 6.58E-01 | Htr2a,15558:down Ampd3,11717:up Igf1,16000:up                                                                                                                                                                                                                                                                                                                                                                                                                                                                                                                                                                                                                                                                                                                                                                                                                                                                                                                                                                                                                                             |
| macromolecule biosynthetic process                                     | GO:0009059 | 5.88E-01 | 6.62E-01 | Fstl3,83554:down Tfec,21426:up Sfrp4,20379:up Ankrd1,107765:down Serpinh1,12406:down Lyl1,17095:up Loxl2,94352:down Loxl3,16950:down Trf,22041:up Wnt5a,22418:down Adipoq,11450:up Bmp4,12159:up Igf1,16000:up Tgfb2,21808:down Fgfr2,14183:up Prl2c2,18811:up Efemp1,216616:up Vdr,22337:down Fabp4,11770:up Slc40a1,53945:up Gas6,14456:up Egfr,13649:down Sfrp1,20377:up Tgfb3,21814:up Sfrp2,20319:up Npnt,114249:up S100a1,20193:up Ice1,218333:down Ccl2,20296:up Ednrb,13618:up Pdgfc,54635:down Epas1,13819:up Uchl5,56207:up Htra3,78558:down Sdpr,20324:down Man2a2,140481:up Bmpr1a,12166:down Ccl4,20303:up Chst11,58250:down Ret,19713:up Vegfb,22340:up Sdf2l1,64136:up Prg4,96875:down Plpp3,67916:up Creb3l1,26427:down Kitl,17311:up Rasl11a,68895:up Inhba,16323:down Bnc2,242509:down Ccl3,20302:up Vegfa,22339:down Igf2,16002:up Tnf,21926:up Pparg,19016:up Lmcd1,30937:up Glp1r,14652:down Fgfr1,14182:down Hmox1,15368:up Has2,15117:down Sulf1,240725:down Grem1,23892:up Phf11d,219132:up Col5a1,12831:down Tbx15,21384:down Enpp1,18605:down Errfi1,74155:down |
| lipid modification                                                     | GO:0030258 | 5.88E-01 | 6.62E-01 | Pparg,19016:up Plpp3,67916:up Adipoq,11450:up                                                                                                                                                                                                                                                                                                                                                                                                                                                                                                                                                                                                                                                                                                                                                                                                                                                                                                                                                                                                                                             |
| intracellular transport                                                | GO:0046907 | 5.90E-01 | 6.64E-01 | Htr2b,15559:down Ice1,218333:down Ccl2,20296:up Htr2a,15558:down Gas6,14456:up Tnf,21926:up Glp1r,14652:down Akr1c18,105349:up Cd24a,12484:down Egfr,13649:down Fgfr1,14182:down Sec23a,20334:down Hmox1,15368:up C1qtnf3,81799:down Cd4,12504:up Bmpr1a,12166:down Ptgs2,19225:down Grem1,23892:up Adipoq,11450:up Bmp4,12159:up Igf1,16000:up Ceacam1,26365:up Sfrp2,20319:up Tgfb2,21808:down                                                                                                                                                                                                                                                                                                                                                                                                                                                                                                                                                                                                                                                                                          |
| regulation of purine nucleotide biosynthetic process                   | GO:1900371 | 5.94E-01 | 6.68E-01 | Adm,11535:up Ptgir,19222:up                                                                                                                                                                                                                                                                                                                                                                                                                                                                                                                                                                                                                                                                                                                                                                                                                                                                                                                                                                                                                                                               |
| neurotransmitter secretion                                             | GO:0007269 | 5.94E-01 | 6.68E-01 | Syt13,80976:up Sncg,20618:up                                                                                                                                                                                                                                                                                                                                                                                                                                                                                                                                                                                                                                                                                                                                                                                                                                                                                                                                                                                                                                                              |
| negative regulation of protein catabolic process                       | GO:0042177 | 5.94E-01 | 6.68E-01 | Egfr,13649:down Serpine2,20720:up                                                                                                                                                                                                                                                                                                                                                                                                                                                                                                                                                                                                                                                                                                                                                                                                                                                                                                                                                                                                                                                         |
| autophagy                                                              | GO:0006914 | 5.96E-01 | 6.70E-01 | Htr2b,15559:down Plk2,20620:down Lmcd1,30937:up Dram1,71712:up Plod2,26432:down Hmox1,15368:up Sfrp4,20379:up                                                                                                                                                                                                                                                                                                                                                                                                                                                                                                                                                                                                                                                                                                                                                                                                                                                                                                                                                                             |
| mitochondrion degradation                                              | GO:0000422 | 5.97E-01 | 6.70E-01 | Lmcd1,30937:up Plod2,26432:down Sfrp4,20379:up                                                                                                                                                                                                                                                                                                                                                                                                                                                                                                                                                                                                                                                                                                                                                                                                                                                                                                                                                                                                                                            |
| ethanolamine-containing compound metabolic process                     | GO:0042439 | 5.99E-01 | 6.72E-01 | Fabp5,16592:up                                                                                                                                                                                                                                                                                                                                                                                                                                                                                                                                                                                                                                                                                                                                                                                                                                                                                                                                                                                                                                                                            |
| somatic diversification of immunoglobulins                             | GO:0016445 | 5.99E-01 | 6.72E-01 | Tfrc,22042:up                                                                                                                                                                                                                                                                                                                                                                                                                                                                                                                                                                                                                                                                                                                                                                                                                                                                                                                                                                                                                                                                             |
| negative regulation of blood pressure                                  | GO:0045776 | 5.99E-01 | 6.72E-01 | Adipoq,11450:up                                                                                                                                                                                                                                                                                                                                                                                                                                                                                                                                                                                                                                                                                                                                                                                                                                                                                                                                                                                                                                                                           |
| DNA damage response, signal transduction by p53 class mediator         | GO:0030330 | 5.99E-01 | 6.72E-01 | Ankrd1,107765:down                                                                                                                                                                                                                                                                                                                                                                                                                                                                                                                                                                                                                                                                                                                                                                                                                                                                                                                                                                                                                                                                        |
| regulation of nucleotide biosynthetic process                          | GO:0030808 | 5.99E-01 | 6.72E-01 | Adm,11535:up Ptgir,19222:up                                                                                                                                                                                                                                                                                                                                                                                                                                                                                                                                                                                                                                                                                                                                                                                                                                                                                                                                                                                                                                                               |
| protein stabilization                                                  | GO:0050821 | 6.04E-01 | 6.77E-01 | Plpp3,67916:up Igf1,16000:up                                                                                                                                                                                                                                                                                                                                                                                                                                                                                                                                                                                                                                                                                                                                                                                                                                                                                                                                                                                                                                                              |
| maintenance of protein location                                        | GO:0045185 | 6.04E-01 | 6.77E-01 | Kdelr3,105785:down Cd4,12504:up                                                                                                                                                                                                                                                                                                                                                                                                                                                                                                                                                                                                                                                                                                                                                                                                                                                                                                                                                                                                                                                           |
| sodium ion transport                                                   | GO:0006814 | 6.04E-01 | 6.78E-01 | Fxyd1,56188:up Serpine2,20720:up Fxyd2,11936:up                                                                                                                                                                                                                                                                                                                                                                                                                                                                                                                                                                                                                                                                                                                                                                                                                                                                                                                                                                                                                                           |
| negative regulation of cation transmembrane transport                  | GO:1904063 | 6.06E-01 | 6.78E-01 | Tgfb2,21808:down                                                                                                                                                                                                                                                                                                                                                                                                                                                                                                                                                                                                                                                                                                                                                                                                                                                                                                                                                                                                                                                                          |



|                                                                  |            |          |          |                                                   |
|------------------------------------------------------------------|------------|----------|----------|---------------------------------------------------|
| negative regulation of reactive oxygen species metabolic process | GO:2000378 | 6.06E-01 | 6.78E-01 | Hp,15439:up                                       |
| multi-organism metabolic process                                 | GO:0044033 | 6.06E-01 | 6.78E-01 | Ccl4,20303:up                                     |
| posttranscriptional gene silencing                               | GO:0016441 | 6.06E-01 | 6.78E-01 | Egfr,13649:down                                   |
| posttranscriptional gene silencing by RNA                        | GO:0035194 | 6.06E-01 | 6.78E-01 | Egfr,13649:down                                   |
| interleukin-2 production                                         | GO:0032623 | 6.06E-01 | 6.78E-01 | Ceacam1,26365:up                                  |
| vesicle localization                                             | GO:0051648 | 6.08E-01 | 6.81E-01 | Cd24a,12484:down Sytn13,80976:up Fgfr2,14183:up   |
| response to UV                                                   | GO:0009411 | 6.09E-01 | 6.81E-01 | Egfr,13649:down Mme,17380:up                      |
| potassium ion transport                                          | GO:0006813 | 6.12E-01 | 6.85E-01 | Htr2a,15558:down Kcnj15,16516:down Fxyd2,11936:up |
| cerebellar cortex development                                    | GO:0021695 | 6.13E-01 | 6.85E-01 | Serpine2,20720:up                                 |
| photoreceptor cell differentiation                               | GO:0046530 | 6.13E-01 | 6.85E-01 | Vegfa,22339:down                                  |
| protein export from nucleus                                      | GO:0006611 | 6.13E-01 | 6.85E-01 | Gas6,14456:up                                     |
| histone deacetylation                                            | GO:0016575 | 6.13E-01 | 6.85E-01 | Vegfa,22339:down                                  |
| nucleoside triphosphate biosynthetic process                     | GO:0009142 | 6.19E-01 | 6.90E-01 | Htr2a,15558:down Igf1,16000:up                    |
| monovalent inorganic cation homeostasis                          | GO:0055067 | 6.19E-01 | 6.90E-01 | Ednrb,13618:up Anpep,16790:up                     |
| positive regulation of organelle assembly                        | GO:1902117 | 6.20E-01 | 6.91E-01 | Tnf,21926:up                                      |
| respiratory gaseous exchange                                     | GO:0007585 | 6.20E-01 | 6.91E-01 | Chst11,58250:down                                 |
| regulation of lipid catabolic process                            | GO:0050994 | 6.20E-01 | 6.91E-01 | Tnf,21926:up                                      |
| negative regulation of axonogenesis                              | GO:0050771 | 6.20E-01 | 6.91E-01 | Wnt5a,22418:down                                  |
| cell cycle arrest                                                | GO:0007050 | 6.23E-01 | 6.94E-01 | Tgfb2,21808:down Inhba,16323:down                 |
| regulation of translational initiation                           | GO:0006446 | 6.27E-01 | 6.98E-01 | Tnf,21926:up                                      |
| release of cytochrome c from mitochondria                        | GO:0001836 | 6.27E-01 | 6.98E-01 | Igf1,16000:up                                     |
| regulation of neurotransmitter secretion                         | GO:0046928 | 6.27E-01 | 6.98E-01 | Sncg,20618:up                                     |
| positive regulation of DNA biosynthetic process                  | GO:2000573 | 6.27E-01 | 6.98E-01 | Grem1,23892:up                                    |
| regulation of dendritic spine development                        | GO:0060998 | 6.27E-01 | 6.98E-01 | Plk2,20620:down                                   |
| macromolecule glycosylation                                      | GO:0043413 | 6.28E-01 | 6.98E-01 | Sdf2l1,64136:up Vegfb,22340:up Man2a2,140481:up   |
| protein glycosylation                                            | GO:0006486 | 6.28E-01 | 6.98E-01 | Sdf2l1,64136:up Vegfb,22340:up Man2a2,140481:up   |
| maintenance of location in cell                                  | GO:0051651 | 6.33E-01 | 7.03E-01 | Kdelr3,105785:down Cd4,12504:up                   |
| cAMP metabolic process                                           | GO:0046058 | 6.33E-01 | 7.03E-01 | Adm,11535:up Ptgir,19222:up                       |
| regulation of DNA recombination                                  | GO:0000018 | 6.34E-01 | 7.04E-01 | Tfrc,22042:up                                     |
| negative regulation of protein complex disassembly               | GO:0043242 | 6.34E-01 | 7.04E-01 | Tnf,21926:up                                      |
| positive regulation of stem cell differentiation                 | GO:2000738 | 6.34E-01 | 7.04E-01 | Tgfb2,21808:down                                  |
| centrosome duplication                                           | GO:0051298 | 6.34E-01 | 7.04E-01 | Plk2,20620:down                                   |
| regulation of excitatory postsynaptic membrane potential         | GO:0060079 | 6.34E-01 | 7.04E-01 | Slc29a1,63959:up                                  |
| actin filament bundle organization                               | GO:0061572 | 6.37E-01 | 7.07E-01 | Fam101b,76566:down Dpysl3,22240:down              |
| somatic cell DNA recombination                                   | GO:0016444 | 6.41E-01 | 7.10E-01 | Tfrc,22042:up                                     |
| membrane docking                                                 | GO:0022406 | 6.41E-01 | 7.10E-01 | Ncam1,17967:down                                  |

|                                                                                              |            |          |          |                                                                                                                                                                                                                                                                                                                                                                                                                                                                                                                                                                                                                                                                                                                                                                                                                                                                                                                                                                                                                           |
|----------------------------------------------------------------------------------------------|------------|----------|----------|---------------------------------------------------------------------------------------------------------------------------------------------------------------------------------------------------------------------------------------------------------------------------------------------------------------------------------------------------------------------------------------------------------------------------------------------------------------------------------------------------------------------------------------------------------------------------------------------------------------------------------------------------------------------------------------------------------------------------------------------------------------------------------------------------------------------------------------------------------------------------------------------------------------------------------------------------------------------------------------------------------------------------|
| cellular response to UV                                                                      | GO:0034644 | 6.41E-01 | 7.10E-01 | Mme,17380:up                                                                                                                                                                                                                                                                                                                                                                                                                                                                                                                                                                                                                                                                                                                                                                                                                                                                                                                                                                                                              |
| somatic diversification of immune receptors via germline recombination within a single locus | GO:0002562 | 6.41E-01 | 7.10E-01 | Tfrc,22042:up                                                                                                                                                                                                                                                                                                                                                                                                                                                                                                                                                                                                                                                                                                                                                                                                                                                                                                                                                                                                             |
| regulation of defense response to virus                                                      | GO:0050688 | 6.42E-01 | 7.11E-01 | Lmcd1,30937:up lfit1,15957:up                                                                                                                                                                                                                                                                                                                                                                                                                                                                                                                                                                                                                                                                                                                                                                                                                                                                                                                                                                                             |
| visual perception                                                                            | GO:0007601 | 6.46E-01 | 7.16E-01 | Col11a1,12814:down Epas1,13819:up                                                                                                                                                                                                                                                                                                                                                                                                                                                                                                                                                                                                                                                                                                                                                                                                                                                                                                                                                                                         |
| purine ribonucleoside triphosphate metabolic process                                         | GO:0009205 | 6.46E-01 | 7.16E-01 | Htr2a,15558:down Ampd3,11717:up lgf1,16000:up                                                                                                                                                                                                                                                                                                                                                                                                                                                                                                                                                                                                                                                                                                                                                                                                                                                                                                                                                                             |
| intrinsic apoptotic signaling pathway in response to endoplasmic reticulum stress            | GO:0070059 | 6.47E-01 | 7.16E-01 | Creb3l1,26427:down                                                                                                                                                                                                                                                                                                                                                                                                                                                                                                                                                                                                                                                                                                                                                                                                                                                                                                                                                                                                        |
| CD4-positive, alpha-beta T cell differentiation                                              | GO:0043367 | 6.47E-01 | 7.16E-01 | Ly9,17085:up                                                                                                                                                                                                                                                                                                                                                                                                                                                                                                                                                                                                                                                                                                                                                                                                                                                                                                                                                                                                              |
| regulation of mRNA stability                                                                 | GO:0043488 | 6.47E-01 | 7.16E-01 | Vegfa,22339:down                                                                                                                                                                                                                                                                                                                                                                                                                                                                                                                                                                                                                                                                                                                                                                                                                                                                                                                                                                                                          |
| mast cell activation                                                                         | GO:0045576 | 6.47E-01 | 7.16E-01 | Hmox1,15368:up                                                                                                                                                                                                                                                                                                                                                                                                                                                                                                                                                                                                                                                                                                                                                                                                                                                                                                                                                                                                            |
| lysosome localization                                                                        | GO:0032418 | 6.47E-01 | 7.16E-01 | Hmox1,15368:up                                                                                                                                                                                                                                                                                                                                                                                                                                                                                                                                                                                                                                                                                                                                                                                                                                                                                                                                                                                                            |
| membrane depolarization                                                                      | GO:0051899 | 6.51E-01 | 7.20E-01 | Slc29a1,63959:up Adipoq,11450:up                                                                                                                                                                                                                                                                                                                                                                                                                                                                                                                                                                                                                                                                                                                                                                                                                                                                                                                                                                                          |
| cholesterol transport                                                                        | GO:0030301 | 6.54E-01 | 7.22E-01 | Adipoq,11450:up                                                                                                                                                                                                                                                                                                                                                                                                                                                                                                                                                                                                                                                                                                                                                                                                                                                                                                                                                                                                           |
| leukocyte degranulation                                                                      | GO:0043299 | 6.54E-01 | 7.22E-01 | Hmox1,15368:up                                                                                                                                                                                                                                                                                                                                                                                                                                                                                                                                                                                                                                                                                                                                                                                                                                                                                                                                                                                                            |
| cellular nitrogen compound biosynthetic process                                              | GO:0044271 | 6.54E-01 | 7.23E-01 | Fstl3,83554:down lce1,218333:down Adm,11535:up Tfec,21426:up Sfrp4,20379:up Ednrb,13618:up Ampd3,11717:up Epas1,13819:up Ankrd1,107765:down Htra3,78558:down Uchl5,56207:up Ddah1,69219:down Lyl1,17095:up Sdpr,20324:down Ggt5,23887:up Loxl2,94352:down Loxl3,16950:down Trf,22041:up Ptx3,19288:up Wnt5a,22418:down Bmpr1a,12166:down Ccl4,20303:up Adipoq,11450:up Bmp4,12159:up lgf1,16000:up Ret,19713:up Pdxk,216134:up Plpp3,67916:up Ptgir,19222:up Creb3l1,26427:down Fgfr2,14183:up Htr2b,15559:down Prl2c2,18811:up Efemp1,216616:up Inhba,16323:down Ras11a,68895:up Bnc2,242509:down Ccl3,20302:up Vdr,22337:down Fabp4,11770:up Vegfa,22339:down Htr2a,15558:down lgf2,16002:up Slc40a1,53945:up Pparg,19016:up Gas6,14456:up Tnf,21926:up Glp1r,14652:down Lmcd1,30937:up Fgfr1,14182:down Egfr,13649:down Hmox1,15368:up Sfrp1,20377:up Sulf1,240725:down Tgfb3,21814:up Ptgs2,19225:down Grem1,23892:up Phf11d,219132:up Sfrp2,20319:up Tbx15,21384:down Npnt,114249:up Uck2,80914:down S100a1,20193:up |
| dephosphorylation                                                                            | GO:0016311 | 6.55E-01 | 7.23E-01 | Tnf,21926:up Alpl,11647:up Tgfb2,21808:down Npnt,114249:up Plpp3,67916:up                                                                                                                                                                                                                                                                                                                                                                                                                                                                                                                                                                                                                                                                                                                                                                                                                                                                                                                                                 |
| lipid transport                                                                              | GO:0006869 | 6.56E-01 | 7.24E-01 | Pparg,19016:up Fam132b,227358:down Inhba,16323:down Adipoq,11450:up                                                                                                                                                                                                                                                                                                                                                                                                                                                                                                                                                                                                                                                                                                                                                                                                                                                                                                                                                       |
| purine ribonucleoside metabolic process                                                      | GO:0046128 | 6.56E-01 | 7.24E-01 | Htr2a,15558:down Enpp1,18605:down Ampd3,11717:up lgf1,16000:up                                                                                                                                                                                                                                                                                                                                                                                                                                                                                                                                                                                                                                                                                                                                                                                                                                                                                                                                                            |
| organelle disassembly                                                                        | GO:1903008 | 6.57E-01 | 7.25E-01 | Lmcd1,30937:up Plod2,26432:down Sfrp4,20379:up                                                                                                                                                                                                                                                                                                                                                                                                                                                                                                                                                                                                                                                                                                                                                                                                                                                                                                                                                                            |
| ribonucleoside triphosphate metabolic process                                                | GO:0009199 | 6.57E-01 | 7.25E-01 | Htr2a,15558:down Ampd3,11717:up lgf1,16000:up                                                                                                                                                                                                                                                                                                                                                                                                                                                                                                                                                                                                                                                                                                                                                                                                                                                                                                                                                                             |
| glycosylation                                                                                | GO:0070085 | 6.57E-01 | 7.25E-01 | Sdf2l1,64136:up Vegfb,22340:up Man2a2,140481:up                                                                                                                                                                                                                                                                                                                                                                                                                                                                                                                                                                                                                                                                                                                                                                                                                                                                                                                                                                           |
| sterol transport                                                                             | GO:0015918 | 6.60E-01 | 7.27E-01 | Adipoq,11450:up                                                                                                                                                                                                                                                                                                                                                                                                                                                                                                                                                                                                                                                                                                                                                                                                                                                                                                                                                                                                           |
| peripheral nervous system development                                                        | GO:0007422 | 6.60E-01 | 7.27E-01 | Ednrb,13618:up                                                                                                                                                                                                                                                                                                                                                                                                                                                                                                                                                                                                                                                                                                                                                                                                                                                                                                                                                                                                            |
| ER-associated ubiquitin-dependent protein catabolic process                                  | GO:0030433 | 6.60E-01 | 7.27E-01 | Sdf2l1,64136:up                                                                                                                                                                                                                                                                                                                                                                                                                                                                                                                                                                                                                                                                                                                                                                                                                                                                                                                                                                                                           |
| regulation of organelle assembly                                                             | GO:1902115 | 6.64E-01 | 7.31E-01 | Tnf,21926:up Plk2,20620:down                                                                                                                                                                                                                                                                                                                                                                                                                                                                                                                                                                                                                                                                                                                                                                                                                                                                                                                                                                                              |
| regulation of cell projection assembly                                                       | GO:0060491 | 6.64E-01 | 7.31E-01 | Prl2c2,18811:up Dpysl3,22240:down                                                                                                                                                                                                                                                                                                                                                                                                                                                                                                                                                                                                                                                                                                                                                                                                                                                                                                                                                                                         |
| sensory perception of light stimulus                                                         | GO:0050953 | 6.64E-01 | 7.31E-01 | Col11a1,12814:down Epas1,13819:up                                                                                                                                                                                                                                                                                                                                                                                                                                                                                                                                                                                                                                                                                                                                                                                                                                                                                                                                                                                         |
| purine ribonucleoside monophosphate metabolic process                                        | GO:0009167 | 6.64E-01 | 7.31E-01 | Htr2a,15558:down Ampd3,11717:up lgf1,16000:up                                                                                                                                                                                                                                                                                                                                                                                                                                                                                                                                                                                                                                                                                                                                                                                                                                                                                                                                                                             |
| somatic diversification of immune receptors                                                  | GO:0002200 | 6.66E-01 | 7.33E-01 | Tfrc,22042:up                                                                                                                                                                                                                                                                                                                                                                                                                                                                                                                                                                                                                                                                                                                                                                                                                                                                                                                                                                                                             |
| neuromuscular process controlling balance                                                    | GO:0050885 | 6.66E-01 | 7.33E-01 | Aldh1a3,56847:down                                                                                                                                                                                                                                                                                                                                                                                                                                                                                                                                                                                                                                                                                                                                                                                                                                                                                                                                                                                                        |

|                                                               |            |          |          |                                                                                                                                                                                                                                                                                                                                                                                                                                                                                                                                                                                                                                                                                                                                                                                                                                                                                                                                                                                                                                                                                                                                                                                                                               |
|---------------------------------------------------------------|------------|----------|----------|-------------------------------------------------------------------------------------------------------------------------------------------------------------------------------------------------------------------------------------------------------------------------------------------------------------------------------------------------------------------------------------------------------------------------------------------------------------------------------------------------------------------------------------------------------------------------------------------------------------------------------------------------------------------------------------------------------------------------------------------------------------------------------------------------------------------------------------------------------------------------------------------------------------------------------------------------------------------------------------------------------------------------------------------------------------------------------------------------------------------------------------------------------------------------------------------------------------------------------|
| oligosaccharide metabolic process                             | GO:0009311 | 6.66E-01 | 7.33E-01 | Man2a2,140481:up                                                                                                                                                                                                                                                                                                                                                                                                                                                                                                                                                                                                                                                                                                                                                                                                                                                                                                                                                                                                                                                                                                                                                                                                              |
| purine nucleoside monophosphate metabolic process             | GO:0009126 | 6.68E-01 | 7.34E-01 | Htr2a,15558:down Ampd3,11717:up Igf1,16000:up                                                                                                                                                                                                                                                                                                                                                                                                                                                                                                                                                                                                                                                                                                                                                                                                                                                                                                                                                                                                                                                                                                                                                                                 |
| purine nucleoside metabolic process                           | GO:0042278 | 6.69E-01 | 7.35E-01 | Htr2a,15558:down Enpp1,18605:down Ampd3,11717:up Igf1,16000:up                                                                                                                                                                                                                                                                                                                                                                                                                                                                                                                                                                                                                                                                                                                                                                                                                                                                                                                                                                                                                                                                                                                                                                |
| lipid catabolic process                                       | GO:0016042 | 6.72E-01 | 7.38E-01 | Tnf,21926:up Akr1c18,105349:up Lpl,16956:up Adipoq,11450:up                                                                                                                                                                                                                                                                                                                                                                                                                                                                                                                                                                                                                                                                                                                                                                                                                                                                                                                                                                                                                                                                                                                                                                   |
| activation of GTPase activity                                 | GO:0090630 | 6.72E-01 | 7.38E-01 | Wnt5a,22418:down                                                                                                                                                                                                                                                                                                                                                                                                                                                                                                                                                                                                                                                                                                                                                                                                                                                                                                                                                                                                                                                                                                                                                                                                              |
| mitotic cell cycle process                                    | GO:1903047 | 6.73E-01 | 7.39E-01 | Tnf,21926:up Plk2,20620:down Fgfr1,14182:down Egfr,13649:down Inhba,16323:down Igf1,16000:up Bmp4,12159:up Nabp1,109019:down Fgfr2,14183:up Igf2,16002:up                                                                                                                                                                                                                                                                                                                                                                                                                                                                                                                                                                                                                                                                                                                                                                                                                                                                                                                                                                                                                                                                     |
| intrinsic apoptotic signaling pathway                         | GO:0097193 | 6.75E-01 | 7.41E-01 | Tnf,21926:up Cxcl12,20315:up Hmox1,15368:up Creb3l1,26427:down                                                                                                                                                                                                                                                                                                                                                                                                                                                                                                                                                                                                                                                                                                                                                                                                                                                                                                                                                                                                                                                                                                                                                                |
| purine nucleoside triphosphate metabolic process              | GO:0009144 | 6.75E-01 | 7.41E-01 | Htr2a,15558:down Ampd3,11717:up Igf1,16000:up                                                                                                                                                                                                                                                                                                                                                                                                                                                                                                                                                                                                                                                                                                                                                                                                                                                                                                                                                                                                                                                                                                                                                                                 |
| protein oligomerization                                       | GO:0051259 | 6.75E-01 | 7.42E-01 | Col1a2,12843:down Hmox1,15368:up C1qtnf3,81799:down C1qtnf6,72709:down Dpysl3,22240:down Cbr2,12409:up Adipoq,11450:up                                                                                                                                                                                                                                                                                                                                                                                                                                                                                                                                                                                                                                                                                                                                                                                                                                                                                                                                                                                                                                                                                                        |
| regulation of membrane potential                              | GO:0042391 | 6.77E-01 | 7.43E-01 | Tnf,21926:up Fxyd1,56188:up Irlr,16181:up Slc29a1,63959:up Adipoq,11450:up                                                                                                                                                                                                                                                                                                                                                                                                                                                                                                                                                                                                                                                                                                                                                                                                                                                                                                                                                                                                                                                                                                                                                    |
| coenzyme metabolic process                                    | GO:0006732 | 6.78E-01 | 7.44E-01 | Htr2a,15558:down Pdxk,216134:up Cbr2,12409:up Igf1,16000:up                                                                                                                                                                                                                                                                                                                                                                                                                                                                                                                                                                                                                                                                                                                                                                                                                                                                                                                                                                                                                                                                                                                                                                   |
| response to endoplasmic reticulum stress                      | GO:0034976 | 6.81E-01 | 7.47E-01 | Pdia5,72599:down Sdf2l1,64136:up Creb3l1,26427:down                                                                                                                                                                                                                                                                                                                                                                                                                                                                                                                                                                                                                                                                                                                                                                                                                                                                                                                                                                                                                                                                                                                                                                           |
| regulation of protein localization to plasma membrane         | GO:1903076 | 6.84E-01 | 7.49E-01 | Lrrc15,74488:down                                                                                                                                                                                                                                                                                                                                                                                                                                                                                                                                                                                                                                                                                                                                                                                                                                                                                                                                                                                                                                                                                                                                                                                                             |
| macroautophagy                                                | GO:0016236 | 6.86E-01 | 7.52E-01 | Lmcd1,30937:up Plod2,26432:down Hmox1,15368:up Sfrp4,20379:up                                                                                                                                                                                                                                                                                                                                                                                                                                                                                                                                                                                                                                                                                                                                                                                                                                                                                                                                                                                                                                                                                                                                                                 |
| regulation of protein complex assembly                        | GO:0043254 | 6.88E-01 | 7.53E-01 | Tnf,21926:up Ice1,218333:down Cd24a,12484:down Ncam1,17967:down Vegfa,22339:down                                                                                                                                                                                                                                                                                                                                                                                                                                                                                                                                                                                                                                                                                                                                                                                                                                                                                                                                                                                                                                                                                                                                              |
| purine nucleoside biosynthetic process                        | GO:0042451 | 6.89E-01 | 7.54E-01 | Htr2a,15558:down Igf1,16000:up                                                                                                                                                                                                                                                                                                                                                                                                                                                                                                                                                                                                                                                                                                                                                                                                                                                                                                                                                                                                                                                                                                                                                                                                |
| purine ribonucleoside biosynthetic process                    | GO:0046129 | 6.89E-01 | 7.54E-01 | Htr2a,15558:down Igf1,16000:up                                                                                                                                                                                                                                                                                                                                                                                                                                                                                                                                                                                                                                                                                                                                                                                                                                                                                                                                                                                                                                                                                                                                                                                                |
| regulation of RNA stability                                   | GO:0043487 | 6.90E-01 | 7.55E-01 | Vegfa,22339:down                                                                                                                                                                                                                                                                                                                                                                                                                                                                                                                                                                                                                                                                                                                                                                                                                                                                                                                                                                                                                                                                                                                                                                                                              |
| cellular aromatic compound metabolic process                  | GO:0006725 | 6.93E-01 | 7.58E-01 | Fstl3,83554:down Adm,11535:up Tfec,21426:up Sfrp4,20379:up Enpp5,83965:up Ankrd1,107765:down Ly1l,17095:up Gstt1,14871:up Blrb,233016:up Igf1,16000:up Lol1,94352:down Lol3,16950:down Trf,22041:up Wnt5a,22418:down Maob,109731:up Adipoq,11450:up Bmp4,12159:up Hal,15109:up Igf1,16000:up Tgfb2,21808:down Ptgir,19222:up Fgfr2,14183:up Htr2b,15559:down Pr1c2,18811:up Efemp1,216616:up Vdr,22337:down Fabp4,11770:up Nabp1,109019:down Htr2a,15558:down Oas3,246727:up Slc40a1,53945:up Gas6,14456:up Egfr,13649:down Sfrp1,20377:up Tgfb3,21814:up Tfrc,22042:up Sfrp2,20319:up Npnt,114249:up S100a1,20193:up Ice1,218333:down Pdgfr,54635:down Ednr,13618:up Ampd3,11717:up Epas1,13819:up Htra3,78558:down Uchl5,56207:up Sdpr,20324:down Enpp3,209558:down Bmpr1a,12166:down Ccl4,20303:up Ret,19713:up Pdxk,216134:up Ppp3,67916:up Creb3l1,26427:down Kitl,17311:up Ras11a,68895:up Inhba,16323:down Bnc2,242509:down Ccl3,20302:up Gfpt2,14584:down Vegfa,22339:down Cbr2,12409:up Igf2,16002:up Anpep,16790:up Tnf,21926:up Pparg,19016:up Lmcd1,30937:up Glp1r,14652:down Fgfr1,14182:down Hmox1,15368:up Sulf1,240725:down Grem1,23892:up Phf11d,219132:up Tbx15,21384:down Uck2,80914:down Enpp1,18605:down |
| endomembrane system organization                              | GO:0010256 | 6.94E-01 | 7.59E-01 | Tnf,21926:up Gas6,14456:up Col5a1,12831:down Tgfb2,21808:down Serpine2,20720:up Lrrc15,74488:down Adipoq,11450:up                                                                                                                                                                                                                                                                                                                                                                                                                                                                                                                                                                                                                                                                                                                                                                                                                                                                                                                                                                                                                                                                                                             |
| positive regulation of viral process                          | GO:0048524 | 6.95E-01 | 7.59E-01 | Ceacam1,26365:up                                                                                                                                                                                                                                                                                                                                                                                                                                                                                                                                                                                                                                                                                                                                                                                                                                                                                                                                                                                                                                                                                                                                                                                                              |
| synaptic vesicle exocytosis                                   | GO:0016079 | 6.95E-01 | 7.59E-01 | Syt13,80976:up                                                                                                                                                                                                                                                                                                                                                                                                                                                                                                                                                                                                                                                                                                                                                                                                                                                                                                                                                                                                                                                                                                                                                                                                                |
| protein deacetylation                                         | GO:0006476 | 6.95E-01 | 7.59E-01 | Vegfa,22339:down                                                                                                                                                                                                                                                                                                                                                                                                                                                                                                                                                                                                                                                                                                                                                                                                                                                                                                                                                                                                                                                                                                                                                                                                              |
| B cell activation involved in immune response                 | GO:0002312 | 6.95E-01 | 7.59E-01 | Tfrc,22042:up                                                                                                                                                                                                                                                                                                                                                                                                                                                                                                                                                                                                                                                                                                                                                                                                                                                                                                                                                                                                                                                                                                                                                                                                                 |
| regulation of TOR signaling                                   | GO:0032006 | 6.95E-01 | 7.59E-01 | Gas6,14456:up                                                                                                                                                                                                                                                                                                                                                                                                                                                                                                                                                                                                                                                                                                                                                                                                                                                                                                                                                                                                                                                                                                                                                                                                                 |
| natural killer cell activation                                | GO:0030101 | 6.95E-01 | 7.59E-01 | Gas6,14456:up                                                                                                                                                                                                                                                                                                                                                                                                                                                                                                                                                                                                                                                                                                                                                                                                                                                                                                                                                                                                                                                                                                                                                                                                                 |
| signal transduction in response to DNA damage                 | GO:0042770 | 6.95E-01 | 7.59E-01 | Ankrd1,107765:down                                                                                                                                                                                                                                                                                                                                                                                                                                                                                                                                                                                                                                                                                                                                                                                                                                                                                                                                                                                                                                                                                                                                                                                                            |
| organonitrogen compound biosynthetic process                  | GO:1901566 | 7.01E-01 | 7.64E-01 | Htr2b,15559:down Adm,11535:up Ampd3,11717:up Epas1,13819:up Htr2a,15558:down Cdo1,12583:up Tnf,21926:up Ggt5,23887:up Fabp5,16592:up Egfr,13649:down Has2,15117:down Igf1,16000:up Chst11,58250:down Gatm,67092:down Pdxk,216134:up Tgfb2,21808:down Ptgir,19222:up Uck2,80914:down                                                                                                                                                                                                                                                                                                                                                                                                                                                                                                                                                                                                                                                                                                                                                                                                                                                                                                                                           |
| regulation of postsynaptic membrane potential                 | GO:0060078 | 7.01E-01 | 7.64E-01 | Slc29a1,63959:up                                                                                                                                                                                                                                                                                                                                                                                                                                                                                                                                                                                                                                                                                                                                                                                                                                                                                                                                                                                                                                                                                                                                                                                                              |
| regulation of release of sequestered calcium ion into cytosol | GO:0051279 | 7.01E-01 | 7.64E-01 | Tgfb2,21808:down                                                                                                                                                                                                                                                                                                                                                                                                                                                                                                                                                                                                                                                                                                                                                                                                                                                                                                                                                                                                                                                                                                                                                                                                              |

|                                                                                  |             |          |          |                                                                                                                                                                                                                                                                                                                                                                                                                                                                                                                                                                                                                                                                                                                                                                                                                                                                                                                                                                                                                                                                                                                                                                                                                      |
|----------------------------------------------------------------------------------|-------------|----------|----------|----------------------------------------------------------------------------------------------------------------------------------------------------------------------------------------------------------------------------------------------------------------------------------------------------------------------------------------------------------------------------------------------------------------------------------------------------------------------------------------------------------------------------------------------------------------------------------------------------------------------------------------------------------------------------------------------------------------------------------------------------------------------------------------------------------------------------------------------------------------------------------------------------------------------------------------------------------------------------------------------------------------------------------------------------------------------------------------------------------------------------------------------------------------------------------------------------------------------|
| regulation of protein dephosphorylation                                          | GO:0035304  | 7.01E-01 | 7.64E-01 | Tnf,21926:up                                                                                                                                                                                                                                                                                                                                                                                                                                                                                                                                                                                                                                                                                                                                                                                                                                                                                                                                                                                                                                                                                                                                                                                                         |
| alpha-amino acid biosynthetic process                                            | GO:1901607  | 7.01E-01 | 7.64E-01 | Gatm,67092:down                                                                                                                                                                                                                                                                                                                                                                                                                                                                                                                                                                                                                                                                                                                                                                                                                                                                                                                                                                                                                                                                                                                                                                                                      |
| regulation of DNA repair                                                         | GO:0006282  | 7.01E-01 | 7.64E-01 | Egfr,13649:down                                                                                                                                                                                                                                                                                                                                                                                                                                                                                                                                                                                                                                                                                                                                                                                                                                                                                                                                                                                                                                                                                                                                                                                                      |
| DNA recombination                                                                | GO:0006310  | 7.01E-01 | 7.65E-01 | Uchl5,56207:up Nabp1,109019:down Tfrc,22042:up                                                                                                                                                                                                                                                                                                                                                                                                                                                                                                                                                                                                                                                                                                                                                                                                                                                                                                                                                                                                                                                                                                                                                                       |
| regulation of intrinsic apoptotic signaling pathway                              | GO:2001242  | 7.04E-01 | 7.68E-01 | Cxcl12,20315:up Creb3l1,26427:down                                                                                                                                                                                                                                                                                                                                                                                                                                                                                                                                                                                                                                                                                                                                                                                                                                                                                                                                                                                                                                                                                                                                                                                   |
| negative regulation of ion transmembrane transport                               | GO:0034766  | 7.06E-01 | 7.69E-01 | Tgfb2,21808:down                                                                                                                                                                                                                                                                                                                                                                                                                                                                                                                                                                                                                                                                                                                                                                                                                                                                                                                                                                                                                                                                                                                                                                                                     |
| regulation of Notch signaling pathway                                            | GO:0008593  | 7.06E-01 | 7.69E-01 | Postn,50706:down                                                                                                                                                                                                                                                                                                                                                                                                                                                                                                                                                                                                                                                                                                                                                                                                                                                                                                                                                                                                                                                                                                                                                                                                     |
| cell-cell junction assembly                                                      | GO:0007043  | 7.06E-01 | 7.69E-01 | Tnf,21926:up                                                                                                                                                                                                                                                                                                                                                                                                                                                                                                                                                                                                                                                                                                                                                                                                                                                                                                                                                                                                                                                                                                                                                                                                         |
| energy derivation by oxidation of organic compounds                              | GO:0015980  | 7.08E-01 | 7.71E-01 | Enpp1,18605:down lgf2,16002:up lgf1,16000:up                                                                                                                                                                                                                                                                                                                                                                                                                                                                                                                                                                                                                                                                                                                                                                                                                                                                                                                                                                                                                                                                                                                                                                         |
| generation of precursor metabolites and energy                                   | GO:0006091  | 7.09E-01 | 7.72E-01 | Htr2a,15558:down Enpp1,18605:down lgf2,16002:up lgf1,16000:up                                                                                                                                                                                                                                                                                                                                                                                                                                                                                                                                                                                                                                                                                                                                                                                                                                                                                                                                                                                                                                                                                                                                                        |
| heterocycle metabolic process                                                    | GO:0046483  | 7.10E-01 | 7.73E-01 | Fstl3,83554:down Adm,11535:up Tfec,21426:up Sfrp4,20379:up Enpp5,83965:up Ankrd1,107765:down Ly1l,17095:up Gstt1,14871:up Blvrb,233016:up lgfbp3,16009:up Loxl2,94352:down Loxl3,16950:down Trf,22041:up Mme,17380:up Wnt5a,22418:down Adipoq,11450:up Bmp4,12159:up Hal,15109:up lgf1,16000:up Ptgir,19222:up Fgfr2,14183:up Htr2b,15559:down Prl2c2,18811:up Efemp1,216616:up Vdr,22337:down Fabp4,11770:up Nabp1,109019:down Htr2a,15558:down Oas3,246727:up Slc40a1,53945:up Gas6,14456:up Egfr,13649:down Sfrp1,20377:up Tgfb3,21814:up Tfrc,22042:up Sfrp2,20319:up Npnt,114249:up S100a1,20193:up lce1,218333:down Pdgfc,54635:down Ednrb,13618:up Ampd3,11717:up Epas1,13819:up Htra3,78558:down Uchl5,56207:up Sdpr,20324:down Enpp3,209558:down Bmpr1a,12166:down Ccl4,20303:up Ret,19713:up Pdk,216134:up Plpp3,67916:up Creb3l1,26427:down Kitl,17311:up P4ha1,18451:down Rasl11a,68895:up Inhba,16323:down Bnc2,242509:down Ccl3,20302:up Gfpt2,14584:down Vegfa,22339:down Cbr2,12409:up lgf2,16002:up Tnf,21926:up Pparg,19016:up Lmcd1,30937:up Glp1r,14652:down Fgfr1,14182:down Hmox1,15368:up Sulf1,240725:down Grem1,23892:up Phf11d,219132:up Tbx15,21384:down Uck2,80914:down Enpp1,18605:down |
| ER to Golgi vesicle-mediated transport                                           | GO:0006888  | 7.12E-01 | 7.74E-01 | Sec23a,20334:down                                                                                                                                                                                                                                                                                                                                                                                                                                                                                                                                                                                                                                                                                                                                                                                                                                                                                                                                                                                                                                                                                                                                                                                                    |
| positive regulation of B cell activation                                         | GO:0050871  | 7.12E-01 | 7.74E-01 | Tfrc,22042:up                                                                                                                                                                                                                                                                                                                                                                                                                                                                                                                                                                                                                                                                                                                                                                                                                                                                                                                                                                                                                                                                                                                                                                                                        |
| centrosome cycle                                                                 | GO:0007098  | 7.12E-01 | 7.74E-01 | Plk2,20620:down                                                                                                                                                                                                                                                                                                                                                                                                                                                                                                                                                                                                                                                                                                                                                                                                                                                                                                                                                                                                                                                                                                                                                                                                      |
| fatty acid beta-oxidation                                                        | GO:0006635  | 7.12E-01 | 7.74E-01 | Adipoq,11450:up                                                                                                                                                                                                                                                                                                                                                                                                                                                                                                                                                                                                                                                                                                                                                                                                                                                                                                                                                                                                                                                                                                                                                                                                      |
| neuropeptide signaling pathway                                                   | GO:0007218  | 7.17E-01 | 7.80E-01 | Glp1r,14652:down                                                                                                                                                                                                                                                                                                                                                                                                                                                                                                                                                                                                                                                                                                                                                                                                                                                                                                                                                                                                                                                                                                                                                                                                     |
| cellular response to starvation                                                  | GO:0009267  | 7.18E-01 | 7.81E-01 | Gas6,14456:up Lmcd1,30937:up Plod2,26432:down Hmox1,15368:up Sfrp4,20379:up                                                                                                                                                                                                                                                                                                                                                                                                                                                                                                                                                                                                                                                                                                                                                                                                                                                                                                                                                                                                                                                                                                                                          |
| positive regulation of T cell differentiation                                    | GO:0045582  | 7.22E-01 | 7.84E-01 | Tnfsf9,21950:up                                                                                                                                                                                                                                                                                                                                                                                                                                                                                                                                                                                                                                                                                                                                                                                                                                                                                                                                                                                                                                                                                                                                                                                                      |
| long-chain fatty acid metabolic process                                          | GO:0001676  | 7.22E-01 | 7.84E-01 | Ptgs2,19225:down                                                                                                                                                                                                                                                                                                                                                                                                                                                                                                                                                                                                                                                                                                                                                                                                                                                                                                                                                                                                                                                                                                                                                                                                     |
| positive regulation of proteasomal ubiquitin-dependent protein catabolic process | GO:0032436  | 7.22E-01 | 7.84E-01 | Plk2,20620:down                                                                                                                                                                                                                                                                                                                                                                                                                                                                                                                                                                                                                                                                                                                                                                                                                                                                                                                                                                                                                                                                                                                                                                                                      |
| protein N-linked glycosylation                                                   | GO:0006487  | 7.22E-01 | 7.84E-01 | Man2a2,140481:up                                                                                                                                                                                                                                                                                                                                                                                                                                                                                                                                                                                                                                                                                                                                                                                                                                                                                                                                                                                                                                                                                                                                                                                                     |
| cellular response to light stimulus                                              | GO:00071482 | 7.27E-01 | 7.89E-01 | Mme,17380:up                                                                                                                                                                                                                                                                                                                                                                                                                                                                                                                                                                                                                                                                                                                                                                                                                                                                                                                                                                                                                                                                                                                                                                                                         |
| protein deacylation                                                              | GO:00035601 | 7.27E-01 | 7.89E-01 | Vegfa,22339:down                                                                                                                                                                                                                                                                                                                                                                                                                                                                                                                                                                                                                                                                                                                                                                                                                                                                                                                                                                                                                                                                                                                                                                                                     |
| skeletal muscle cell differentiation                                             | GO:00035914 | 7.27E-01 | 7.89E-01 | Ankrd1,107765:down                                                                                                                                                                                                                                                                                                                                                                                                                                                                                                                                                                                                                                                                                                                                                                                                                                                                                                                                                                                                                                                                                                                                                                                                   |
| macromolecule deacylation                                                        | GO:00098732 | 7.32E-01 | 7.93E-01 | Vegfa,22339:down                                                                                                                                                                                                                                                                                                                                                                                                                                                                                                                                                                                                                                                                                                                                                                                                                                                                                                                                                                                                                                                                                                                                                                                                     |
| glial cell development                                                           | GO:00021782 | 7.32E-01 | 7.93E-01 | Egfr,13649:down                                                                                                                                                                                                                                                                                                                                                                                                                                                                                                                                                                                                                                                                                                                                                                                                                                                                                                                                                                                                                                                                                                                                                                                                      |
| oogenesis                                                                        | GO:00048477 | 7.32E-01 | 7.93E-01 | lgf1,16000:up                                                                                                                                                                                                                                                                                                                                                                                                                                                                                                                                                                                                                                                                                                                                                                                                                                                                                                                                                                                                                                                                                                                                                                                                        |
| positive regulation of insulin secretion                                         | GO:00032024 | 7.32E-01 | 7.93E-01 | Glp1r,14652:down                                                                                                                                                                                                                                                                                                                                                                                                                                                                                                                                                                                                                                                                                                                                                                                                                                                                                                                                                                                                                                                                                                                                                                                                     |
| regulation of cyclin-dependent protein serine/threonine kinase activity          | GO:0000079  | 7.32E-01 | 7.93E-01 | Egfr,13649:down                                                                                                                                                                                                                                                                                                                                                                                                                                                                                                                                                                                                                                                                                                                                                                                                                                                                                                                                                                                                                                                                                                                                                                                                      |
| regulation of mitochondrion organization                                         | GO:0010821  | 7.34E-01 | 7.94E-01 | Lmcd1,30937:up Plod2,26432:down Sfrp4,20379:up lgf1,16000:up                                                                                                                                                                                                                                                                                                                                                                                                                                                                                                                                                                                                                                                                                                                                                                                                                                                                                                                                                                                                                                                                                                                                                         |

|                                                              |            |          |          |                                                                                                                                                                                                                                                                                                                                                                                                                                                                                                                                                                                                                                                                                                                                                                                                                                                                                                                                                                                                                                                                                                                                                                                                                                                                         |
|--------------------------------------------------------------|------------|----------|----------|-------------------------------------------------------------------------------------------------------------------------------------------------------------------------------------------------------------------------------------------------------------------------------------------------------------------------------------------------------------------------------------------------------------------------------------------------------------------------------------------------------------------------------------------------------------------------------------------------------------------------------------------------------------------------------------------------------------------------------------------------------------------------------------------------------------------------------------------------------------------------------------------------------------------------------------------------------------------------------------------------------------------------------------------------------------------------------------------------------------------------------------------------------------------------------------------------------------------------------------------------------------------------|
| T cell mediated immunity                                     | GO:0002456 | 7.37E-01 | 7.97E-01 | Cd24a,12484:down                                                                                                                                                                                                                                                                                                                                                                                                                                                                                                                                                                                                                                                                                                                                                                                                                                                                                                                                                                                                                                                                                                                                                                                                                                                        |
| dendritic spine development                                  | GO:0060996 | 7.37E-01 | 7.97E-01 | Plk2,20620:down                                                                                                                                                                                                                                                                                                                                                                                                                                                                                                                                                                                                                                                                                                                                                                                                                                                                                                                                                                                                                                                                                                                                                                                                                                                         |
| regulation of cyclin-dependent protein kinase activity       | GO:1904029 | 7.37E-01 | 7.97E-01 | Egfr,13649:down                                                                                                                                                                                                                                                                                                                                                                                                                                                                                                                                                                                                                                                                                                                                                                                                                                                                                                                                                                                                                                                                                                                                                                                                                                                         |
| protein localization to membrane                             | GO:0072657 | 7.37E-01 | 7.97E-01 | Tnf,21926:up Gas6,14456:up Ccl2,20296:up Lrrc15,74488:down Adipoq,11450:up                                                                                                                                                                                                                                                                                                                                                                                                                                                                                                                                                                                                                                                                                                                                                                                                                                                                                                                                                                                                                                                                                                                                                                                              |
| negative regulation of transmembrane transport               | GO:0034763 | 7.42E-01 | 8.01E-01 | Tgfb2,21808:down                                                                                                                                                                                                                                                                                                                                                                                                                                                                                                                                                                                                                                                                                                                                                                                                                                                                                                                                                                                                                                                                                                                                                                                                                                                        |
| polyol metabolic process                                     | GO:0019751 | 7.42E-01 | 8.01E-01 | Sord,20322:up                                                                                                                                                                                                                                                                                                                                                                                                                                                                                                                                                                                                                                                                                                                                                                                                                                                                                                                                                                                                                                                                                                                                                                                                                                                           |
| DNA modification                                             | GO:0006304 | 7.42E-01 | 8.01E-01 | Gstt1,14871:up                                                                                                                                                                                                                                                                                                                                                                                                                                                                                                                                                                                                                                                                                                                                                                                                                                                                                                                                                                                                                                                                                                                                                                                                                                                          |
| liposaccharide metabolic process                             | GO:1903509 | 7.42E-01 | 8.01E-01 | Aoah,27052:up                                                                                                                                                                                                                                                                                                                                                                                                                                                                                                                                                                                                                                                                                                                                                                                                                                                                                                                                                                                                                                                                                                                                                                                                                                                           |
| regulation of potassium ion transport                        | GO:0043266 | 7.42E-01 | 8.01E-01 | Htr2a,15558:down                                                                                                                                                                                                                                                                                                                                                                                                                                                                                                                                                                                                                                                                                                                                                                                                                                                                                                                                                                                                                                                                                                                                                                                                                                                        |
| regulation of protein complex disassembly                    | GO:0043244 | 7.42E-01 | 8.01E-01 | Tnf,21926:up                                                                                                                                                                                                                                                                                                                                                                                                                                                                                                                                                                                                                                                                                                                                                                                                                                                                                                                                                                                                                                                                                                                                                                                                                                                            |
| organic cyclic compound metabolic process                    | GO:1901360 | 7.42E-01 | 8.01E-01 | Fstl3,83554:down Adm,11535:up Tfec,21426:up Sfrp4,20379:up Enpp5,83965:up Ankrd1,107765:down Ly1l,17095:up Gstt1,14871:up Blvrb,233016:up lgfbp3,16009:up Loxl2,94352:down Loxl3,16950:down Trf,22041:up Mme,17380:up Wnt5a,22418:down Maob,109731:up Adipoq,11450:up Bmp4,12159:up Hal,15109:up lgf1,16000:up Tgfb2,21808:down Ptgir,19222:up Fgfr2,14183:up Htr2b,15559:down Prl2c2,18811:up Efemp1,216616:up Vdr,22337:down Fabp4,11770:up Nabp1,109019:down Htr2a,15558:down Oas3,246727:up Slc40a1,53945:up Gas6,14456:up Egfr,13649:down Sfrp1,20377:up Tgfb3,21814:up Tfrc,22042:up Sfrp2,20319:up Npnt,114249:up S100a1,20193:up lce1,218333:down Pdgfc,54635:down Ednrb,13618:up Ampd3,11717:up Epas1,13819:up Htra3,78558:down Uchl5,56207:up Sdpr,20324:down Enpp3,209558:down Akr1c18,105349:up Bmpr1a,12166:down Ccl4,20303:up Ret,19713:up Pdxk,216134:up Plpp3,67916:up Creb3l1,26427:down Kitl,17311:up P4ha1,18451:down Rasl11a,68895:up Inhba,16323:down Bnc2,242509:down Ccl3,20302:up Vegfa,22339:down Gfpt2,14584:down Cbr2,12409:up lgf2,16002:up Tnf,21926:up Pparg,19016:up Lmcd1,30937:up Glp1r,14652:down Fgfr1,14182:down Hmox1,15368:up Sulf1,240725:down Grem1,23892:up Phf11d,219132:up Tbx15,21384:down Uck2,80914:down Enpp1,18605:down |
| cell cycle checkpoint                                        | GO:0000075 | 7.44E-01 | 8.04E-01 | Plk2,20620:down Nabp1,109019:down                                                                                                                                                                                                                                                                                                                                                                                                                                                                                                                                                                                                                                                                                                                                                                                                                                                                                                                                                                                                                                                                                                                                                                                                                                       |
| TOR signaling                                                | GO:0031929 | 7.46E-01 | 8.05E-01 | Gas6,14456:up                                                                                                                                                                                                                                                                                                                                                                                                                                                                                                                                                                                                                                                                                                                                                                                                                                                                                                                                                                                                                                                                                                                                                                                                                                                           |
| localization within membrane                                 | GO:0051668 | 7.46E-01 | 8.05E-01 | Cd24a,12484:down                                                                                                                                                                                                                                                                                                                                                                                                                                                                                                                                                                                                                                                                                                                                                                                                                                                                                                                                                                                                                                                                                                                                                                                                                                                        |
| regulation of pH                                             | GO:0006885 | 7.46E-01 | 8.05E-01 | Ednrb,13618:up                                                                                                                                                                                                                                                                                                                                                                                                                                                                                                                                                                                                                                                                                                                                                                                                                                                                                                                                                                                                                                                                                                                                                                                                                                                          |
| ERAD pathway                                                 | GO:0036503 | 7.46E-01 | 8.05E-01 | Sdf2l1,64136:up                                                                                                                                                                                                                                                                                                                                                                                                                                                                                                                                                                                                                                                                                                                                                                                                                                                                                                                                                                                                                                                                                                                                                                                                                                                         |
| actin filament organization                                  | GO:0007015 | 7.49E-01 | 8.08E-01 | Fam101b,76566:down Trf,22041:up Shroom4,208431:down Dpysl3,22240:down                                                                                                                                                                                                                                                                                                                                                                                                                                                                                                                                                                                                                                                                                                                                                                                                                                                                                                                                                                                                                                                                                                                                                                                                   |
| mitotic spindle organization                                 | GO:0007052 | 7.51E-01 | 8.09E-01 | Plk2,20620:down                                                                                                                                                                                                                                                                                                                                                                                                                                                                                                                                                                                                                                                                                                                                                                                                                                                                                                                                                                                                                                                                                                                                                                                                                                                         |
| negative regulation of protein ubiquitination                | GO:0031397 | 7.51E-01 | 8.09E-01 | Nxn,18230:down                                                                                                                                                                                                                                                                                                                                                                                                                                                                                                                                                                                                                                                                                                                                                                                                                                                                                                                                                                                                                                                                                                                                                                                                                                                          |
| peptidyl-threonine phosphorylation                           | GO:0018107 | 7.51E-01 | 8.09E-01 | Wnt5a,22418:down                                                                                                                                                                                                                                                                                                                                                                                                                                                                                                                                                                                                                                                                                                                                                                                                                                                                                                                                                                                                                                                                                                                                                                                                                                                        |
| cell cycle phase transition                                  | GO:0044770 | 7.51E-01 | 8.09E-01 | Plk2,20620:down Egfr,13649:down Inhba,16323:down Susd2,71733:up                                                                                                                                                                                                                                                                                                                                                                                                                                                                                                                                                                                                                                                                                                                                                                                                                                                                                                                                                                                                                                                                                                                                                                                                         |
| positive regulation of histone modification                  | GO:0031058 | 7.55E-01 | 8.13E-01 | Vegfa,22339:down                                                                                                                                                                                                                                                                                                                                                                                                                                                                                                                                                                                                                                                                                                                                                                                                                                                                                                                                                                                                                                                                                                                                                                                                                                                        |
| positive regulation of proteasomal protein catabolic process | GO:1901800 | 7.55E-01 | 8.13E-01 | Plk2,20620:down                                                                                                                                                                                                                                                                                                                                                                                                                                                                                                                                                                                                                                                                                                                                                                                                                                                                                                                                                                                                                                                                                                                                                                                                                                                         |
| response to starvation                                       | GO:0042594 | 7.56E-01 | 8.13E-01 | Gas6,14456:up Lmcd1,30937:up Plod2,26432:down Hmox1,15368:up Sfrp4,20379:up                                                                                                                                                                                                                                                                                                                                                                                                                                                                                                                                                                                                                                                                                                                                                                                                                                                                                                                                                                                                                                                                                                                                                                                             |
| proton transport                                             | GO:0015992 | 7.60E-01 | 8.17E-01 | Hvcn1,74096:up                                                                                                                                                                                                                                                                                                                                                                                                                                                                                                                                                                                                                                                                                                                                                                                                                                                                                                                                                                                                                                                                                                                                                                                                                                                          |
| regulation of macroautophagy                                 | GO:0016241 | 7.60E-01 | 8.17E-01 | Hmox1,15368:up                                                                                                                                                                                                                                                                                                                                                                                                                                                                                                                                                                                                                                                                                                                                                                                                                                                                                                                                                                                                                                                                                                                                                                                                                                                          |
| T cell differentiation in thymus                             | GO:0033077 | 7.60E-01 | 8.17E-01 | Bmp4,12159:up                                                                                                                                                                                                                                                                                                                                                                                                                                                                                                                                                                                                                                                                                                                                                                                                                                                                                                                                                                                                                                                                                                                                                                                                                                                           |
| thymocyte aggregation                                        | GO:0071594 | 7.60E-01 | 8.17E-01 | Bmp4,12159:up                                                                                                                                                                                                                                                                                                                                                                                                                                                                                                                                                                                                                                                                                                                                                                                                                                                                                                                                                                                                                                                                                                                                                                                                                                                           |
| actin cytoskeleton reorganization                            | GO:0031532 | 7.60E-01 | 8.17E-01 | Ptk7,71461:down                                                                                                                                                                                                                                                                                                                                                                                                                                                                                                                                                                                                                                                                                                                                                                                                                                                                                                                                                                                                                                                                                                                                                                                                                                                         |

|                                                                                     |            |          |          |                                                                                                                                                                                                                                                                                                                                                                                                                                                                                                                                                                                                                                                                                                                                                                                                                                                                                                                                                                                                                                                                                                                                                                                                                                                                                                                                              |
|-------------------------------------------------------------------------------------|------------|----------|----------|----------------------------------------------------------------------------------------------------------------------------------------------------------------------------------------------------------------------------------------------------------------------------------------------------------------------------------------------------------------------------------------------------------------------------------------------------------------------------------------------------------------------------------------------------------------------------------------------------------------------------------------------------------------------------------------------------------------------------------------------------------------------------------------------------------------------------------------------------------------------------------------------------------------------------------------------------------------------------------------------------------------------------------------------------------------------------------------------------------------------------------------------------------------------------------------------------------------------------------------------------------------------------------------------------------------------------------------------|
| cellular nitrogen compound metabolic process                                        | GO:0034641 | 7.60E-01 | 8.17E-01 | Fstl3,83554:down Adm,11535:up Tfec,21426:up Sfrp4,20379:up Enpp5,83965:up Ankrd1,107765:down Ly1l,17095:up Gstt1,14871:up Blvrb,233016:up lgfbp3,16009:up Ggt5,23887:up Loxl2,94352:down Loxl3,16950:down Trf,22041:up Mme,17380:up Wnt5a,22418:down Maob,109731:up Adipoq,11450:up Bmp4,12159:up Hal,15109:up lgf1,16000:up Ptgir,19222:up Fgfr2,14183:up Htr2b,15559:down Prl2c2,18811:up Efemp1,216616:up Vdr,22337:down Fabp4,11770:up Nabp1,109019:down Htr2a,15558:down Oas3,246727:up Slc40a1,53945:up Gas6,14456:up Egfr,13649:down Sfrp1,20377:up Tgfb3,21814:up Tfrc,22042:up Gstm1,14862:up Sfrp2,20319:up Npnt,114249:up S100a1,20193:up lce1,218333:down Pdgfc,54635:down Ednrb,13618:up Ampd3,11717:up Mmp13,17386:up Epas1,13819:up Htra3,78558:down Uchl5,56207:up Ddah1,69219:down Scpr,20324:down Enpp3,209558:down Ptx3,19288:up Fabp5,16592:up Bmpr1a,12166:down Ccl4,20303:up Ret,19713:up Pdkk,216134:up Ppp3,67916:up Creb3l1,26427:down Kitl,17311:up Rasl11a,68895:up Inhba,16323:down Bnc2,242509:down Ccl3,20302:up Vegfa,22339:down Gfpt2,14584:down Cbr2,12409:up lgf2,16002:up Anpep,16790:up Pparg,19016:up Tnf,21926:up Lmcd1,30937:up Glp1r,14652:down Fgfr1,14182:down Hmox1,15368:up Sulf1,240725:down Ptgs2,19225:down Grem1,23892:up Phf11d,219132:up Tbx15,21384:down Uck2,80914:down Enpp1,18605:down |
| hydrogen transport                                                                  | GO:006818  | 7.64E-01 | 8.21E-01 | Hvcn1,74096:up                                                                                                                                                                                                                                                                                                                                                                                                                                                                                                                                                                                                                                                                                                                                                                                                                                                                                                                                                                                                                                                                                                                                                                                                                                                                                                                               |
| regulation of G1/S transition of mitotic cell cycle                                 | GO:2000045 | 7.64E-01 | 8.21E-01 | Egfr,13649:down                                                                                                                                                                                                                                                                                                                                                                                                                                                                                                                                                                                                                                                                                                                                                                                                                                                                                                                                                                                                                                                                                                                                                                                                                                                                                                                              |
| gene silencing by RNA                                                               | GO:0031047 | 7.64E-01 | 8.21E-01 | Egfr,13649:down                                                                                                                                                                                                                                                                                                                                                                                                                                                                                                                                                                                                                                                                                                                                                                                                                                                                                                                                                                                                                                                                                                                                                                                                                                                                                                                              |
| peptidyl-threonine modification                                                     | GO:0018210 | 7.69E-01 | 8.25E-01 | Wnt5a,22418:down                                                                                                                                                                                                                                                                                                                                                                                                                                                                                                                                                                                                                                                                                                                                                                                                                                                                                                                                                                                                                                                                                                                                                                                                                                                                                                                             |
| Notch signaling pathway                                                             | GO:0007219 | 7.71E-01 | 8.27E-01 | Hp,15439:up Postn,50706:down                                                                                                                                                                                                                                                                                                                                                                                                                                                                                                                                                                                                                                                                                                                                                                                                                                                                                                                                                                                                                                                                                                                                                                                                                                                                                                                 |
| xenophagy                                                                           | GO:0098792 | 7.73E-01 | 8.28E-01 | Lmcd1,30937:up                                                                                                                                                                                                                                                                                                                                                                                                                                                                                                                                                                                                                                                                                                                                                                                                                                                                                                                                                                                                                                                                                                                                                                                                                                                                                                                               |
| toll-like receptor signaling pathway                                                | GO:0002224 | 7.73E-01 | 8.28E-01 | Tnf,21926:up                                                                                                                                                                                                                                                                                                                                                                                                                                                                                                                                                                                                                                                                                                                                                                                                                                                                                                                                                                                                                                                                                                                                                                                                                                                                                                                                 |
| positive regulation of chromatin modification                                       | GO:1903310 | 7.73E-01 | 8.28E-01 | Vegfa,22339:down                                                                                                                                                                                                                                                                                                                                                                                                                                                                                                                                                                                                                                                                                                                                                                                                                                                                                                                                                                                                                                                                                                                                                                                                                                                                                                                             |
| regulated secretory pathway                                                         | GO:0045055 | 7.74E-01 | 8.29E-01 | Hmox1,15368:up Synt13,80976:up                                                                                                                                                                                                                                                                                                                                                                                                                                                                                                                                                                                                                                                                                                                                                                                                                                                                                                                                                                                                                                                                                                                                                                                                                                                                                                               |
| cerebellum development                                                              | GO:0021549 | 7.77E-01 | 8.32E-01 | Serpine2,20720:up                                                                                                                                                                                                                                                                                                                                                                                                                                                                                                                                                                                                                                                                                                                                                                                                                                                                                                                                                                                                                                                                                                                                                                                                                                                                                                                            |
| cellular biogenic amine metabolic process                                           | GO:0006576 | 7.77E-01 | 8.32E-01 | Fabp5,16592:up                                                                                                                                                                                                                                                                                                                                                                                                                                                                                                                                                                                                                                                                                                                                                                                                                                                                                                                                                                                                                                                                                                                                                                                                                                                                                                                               |
| double-strand break repair via homologous recombination                             | GO:0000724 | 7.77E-01 | 8.32E-01 | Nabp1,109019:down                                                                                                                                                                                                                                                                                                                                                                                                                                                                                                                                                                                                                                                                                                                                                                                                                                                                                                                                                                                                                                                                                                                                                                                                                                                                                                                            |
| recombinational repair                                                              | GO:0000725 | 7.77E-01 | 8.32E-01 | Nabp1,109019:down                                                                                                                                                                                                                                                                                                                                                                                                                                                                                                                                                                                                                                                                                                                                                                                                                                                                                                                                                                                                                                                                                                                                                                                                                                                                                                                            |
| positive regulation of translation                                                  | GO:0045727 | 7.77E-01 | 8.32E-01 | Tnf,21926:up                                                                                                                                                                                                                                                                                                                                                                                                                                                                                                                                                                                                                                                                                                                                                                                                                                                                                                                                                                                                                                                                                                                                                                                                                                                                                                                                 |
| associative learning                                                                | GO:0008306 | 7.81E-01 | 8.35E-01 | Glp1r,14652:down                                                                                                                                                                                                                                                                                                                                                                                                                                                                                                                                                                                                                                                                                                                                                                                                                                                                                                                                                                                                                                                                                                                                                                                                                                                                                                                             |
| negative regulation of protein modification by small protein conjugation or removal | GO:1903321 | 7.81E-01 | 8.35E-01 | Nxn,18230:down                                                                                                                                                                                                                                                                                                                                                                                                                                                                                                                                                                                                                                                                                                                                                                                                                                                                                                                                                                                                                                                                                                                                                                                                                                                                                                                               |
| regulation of actin filament-based process                                          | GO:0032970 | 7.84E-01 | 8.38E-01 | Fxyd1,56188:up Gpm6b,14758:up Tgfb2,21808:down Stc1,20855:up                                                                                                                                                                                                                                                                                                                                                                                                                                                                                                                                                                                                                                                                                                                                                                                                                                                                                                                                                                                                                                                                                                                                                                                                                                                                                 |
| alpha-beta T cell differentiation                                                   | GO:0046632 | 7.85E-01 | 8.38E-01 | Ly9,17085:up                                                                                                                                                                                                                                                                                                                                                                                                                                                                                                                                                                                                                                                                                                                                                                                                                                                                                                                                                                                                                                                                                                                                                                                                                                                                                                                                 |
| fatty acid catabolic process                                                        | GO:0009062 | 7.85E-01 | 8.38E-01 | Adipoq,11450:up                                                                                                                                                                                                                                                                                                                                                                                                                                                                                                                                                                                                                                                                                                                                                                                                                                                                                                                                                                                                                                                                                                                                                                                                                                                                                                                              |
| coenzyme biosynthetic process                                                       | GO:0009108 | 7.85E-01 | 8.38E-01 | Pdkk,216134:up                                                                                                                                                                                                                                                                                                                                                                                                                                                                                                                                                                                                                                                                                                                                                                                                                                                                                                                                                                                                                                                                                                                                                                                                                                                                                                                               |
| chloride transport                                                                  | GO:0006821 | 7.89E-01 | 8.42E-01 | Fxyd1,56188:up                                                                                                                                                                                                                                                                                                                                                                                                                                                                                                                                                                                                                                                                                                                                                                                                                                                                                                                                                                                                                                                                                                                                                                                                                                                                                                                               |
| positive regulation of mitochondrion organization                                   | GO:0010822 | 7.89E-01 | 8.42E-01 | Lmcd1,30937:up Plod2,26432:down Sfrp4,20379:up                                                                                                                                                                                                                                                                                                                                                                                                                                                                                                                                                                                                                                                                                                                                                                                                                                                                                                                                                                                                                                                                                                                                                                                                                                                                                               |
| multi-organism behavior                                                             | GO:0051705 | 7.93E-01 | 8.45E-01 | Serpine2,20720:up                                                                                                                                                                                                                                                                                                                                                                                                                                                                                                                                                                                                                                                                                                                                                                                                                                                                                                                                                                                                                                                                                                                                                                                                                                                                                                                            |
| regulation of proteasomal protein catabolic process                                 | GO:0061136 | 7.97E-01 | 8.50E-01 | Uchl5,56207:up Plk2,20620:down                                                                                                                                                                                                                                                                                                                                                                                                                                                                                                                                                                                                                                                                                                                                                                                                                                                                                                                                                                                                                                                                                                                                                                                                                                                                                                               |
| mitotic cell cycle                                                                  | GO:0000278 | 7.98E-01 | 8.51E-01 | Tnf,21926:up Plk2,20620:down Fgfr1,14182:down Egfr,13649:down Inhba,16323:down lgf1,16000:up Bmp4,12159:up Nabp1,109019:down Fgfr2,14183:up lgf2,16002:up                                                                                                                                                                                                                                                                                                                                                                                                                                                                                                                                                                                                                                                                                                                                                                                                                                                                                                                                                                                                                                                                                                                                                                                    |
| regulation of exocytosis                                                            | GO:0017157 | 8.00E-01 | 8.52E-01 | Ncam1,17967:down Hmox1,15368:up                                                                                                                                                                                                                                                                                                                                                                                                                                                                                                                                                                                                                                                                                                                                                                                                                                                                                                                                                                                                                                                                                                                                                                                                                                                                                                              |
| nucleic acid phosphodiester bond hydrolysis                                         | GO:0090305 | 8.00E-01 | 8.53E-01 | lgfbp3,16009:up                                                                                                                                                                                                                                                                                                                                                                                                                                                                                                                                                                                                                                                                                                                                                                                                                                                                                                                                                                                                                                                                                                                                                                                                                                                                                                                              |
| circadian rhythm                                                                    | GO:0007623 | 8.05E-01 | 8.57E-01 | Pparg,19016:up lgf1,16000:up                                                                                                                                                                                                                                                                                                                                                                                                                                                                                                                                                                                                                                                                                                                                                                                                                                                                                                                                                                                                                                                                                                                                                                                                                                                                                                                 |
| metencephalon development                                                           | GO:0022037 | 8.07E-01 | 8.59E-01 | Serpine2,20720:up                                                                                                                                                                                                                                                                                                                                                                                                                                                                                                                                                                                                                                                                                                                                                                                                                                                                                                                                                                                                                                                                                                                                                                                                                                                                                                                            |

|                                                                                   |            |          |          |                                                                                                                                                                                                                                                                                                                                                                                                                                                                                                                                                                                                                                                                                                                                                                                                                                                                                                                                                                                                                                                                                                                                             |
|-----------------------------------------------------------------------------------|------------|----------|----------|---------------------------------------------------------------------------------------------------------------------------------------------------------------------------------------------------------------------------------------------------------------------------------------------------------------------------------------------------------------------------------------------------------------------------------------------------------------------------------------------------------------------------------------------------------------------------------------------------------------------------------------------------------------------------------------------------------------------------------------------------------------------------------------------------------------------------------------------------------------------------------------------------------------------------------------------------------------------------------------------------------------------------------------------------------------------------------------------------------------------------------------------|
| cell recognition                                                                  | GO:0008037 | 8.07E-01 | 8.59E-01 | Wnt5a,22418:down                                                                                                                                                                                                                                                                                                                                                                                                                                                                                                                                                                                                                                                                                                                                                                                                                                                                                                                                                                                                                                                                                                                            |
| protein deubiquitination                                                          | GO:0016579 | 8.07E-01 | 8.59E-01 | Uchl5,56207:up                                                                                                                                                                                                                                                                                                                                                                                                                                                                                                                                                                                                                                                                                                                                                                                                                                                                                                                                                                                                                                                                                                                              |
| response to light stimulus                                                        | GO:0009416 | 8.08E-01 | 8.59E-01 | Pparg,19016:up Egfr,13649:down Mme,17380:up                                                                                                                                                                                                                                                                                                                                                                                                                                                                                                                                                                                                                                                                                                                                                                                                                                                                                                                                                                                                                                                                                                 |
| positive regulation of proteolysis involved in cellular protein catabolic process | GO:1903052 | 8.11E-01 | 8.62E-01 | Plk2,20620:down                                                                                                                                                                                                                                                                                                                                                                                                                                                                                                                                                                                                                                                                                                                                                                                                                                                                                                                                                                                                                                                                                                                             |
| acid secretion                                                                    | GO:0046717 | 8.11E-01 | 8.62E-01 | Il1rn,16181:up                                                                                                                                                                                                                                                                                                                                                                                                                                                                                                                                                                                                                                                                                                                                                                                                                                                                                                                                                                                                                                                                                                                              |
| mitotic nuclear division                                                          | GO:0007067 | 8.16E-01 | 8.67E-01 | Tnf,21926:up lgf2,16002:up Fgfr2,14183:up lgf1,16000:up Bmp4,12159:up                                                                                                                                                                                                                                                                                                                                                                                                                                                                                                                                                                                                                                                                                                                                                                                                                                                                                                                                                                                                                                                                       |
| positive regulation of cellular amide metabolic process                           | GO:0034250 | 8.18E-01 | 8.68E-01 | Tnf,21926:up                                                                                                                                                                                                                                                                                                                                                                                                                                                                                                                                                                                                                                                                                                                                                                                                                                                                                                                                                                                                                                                                                                                                |
| positive regulation of defense response to virus by host                          | GO:0002230 | 8.18E-01 | 8.68E-01 | Lmcd1,30937:up                                                                                                                                                                                                                                                                                                                                                                                                                                                                                                                                                                                                                                                                                                                                                                                                                                                                                                                                                                                                                                                                                                                              |
| cell cycle process                                                                | GO:0022402 | 8.20E-01 | 8.70E-01 | Tnf,21926:up Plk2,20620:down Fgfr1,14182:down Egfr,13649:down Sfrp1,20377:up Wnt5a,22418:down Inhba,16323:down Susd2,71733:up lgf1,16000:up Bmp4,12159:up Nabp1,109019:down Tgfb2,21808:down Fgfr2,14183:up lgf2,16002:up                                                                                                                                                                                                                                                                                                                                                                                                                                                                                                                                                                                                                                                                                                                                                                                                                                                                                                                   |
| peptide metabolic process                                                         | GO:0006518 | 8.20E-01 | 8.70E-01 | Ggt5,23887:up Tnf,21926:up Egfr,13649:down Mme,17380:up Mmp13,17386:up lgf1,16000:up Gstm1,14862:up Gstt1,14871:up Anpep,16790:up                                                                                                                                                                                                                                                                                                                                                                                                                                                                                                                                                                                                                                                                                                                                                                                                                                                                                                                                                                                                           |
| sexual reproduction                                                               | GO:0019953 | 8.23E-01 | 8.73E-01 | Inhba,16323:down Ptgs2,19225:down Ednrb,13618:up Plat,18791:down lgf1,16000:up Bmp4,12159:up Cxc12,20315:up Serpine2,20720:up Kitl,17311:up                                                                                                                                                                                                                                                                                                                                                                                                                                                                                                                                                                                                                                                                                                                                                                                                                                                                                                                                                                                                 |
| centrosome organization                                                           | GO:0051297 | 8.24E-01 | 8.73E-01 | Plk2,20620:down                                                                                                                                                                                                                                                                                                                                                                                                                                                                                                                                                                                                                                                                                                                                                                                                                                                                                                                                                                                                                                                                                                                             |
| gamete generation                                                                 | GO:0007276 | 8.24E-01 | 8.73E-01 | Cxcl12,20315:up Inhba,16323:down Ptgs2,19225:down Plat,18791:down Kitl,17311:up lgf1,16000:up Bmp4,12159:up                                                                                                                                                                                                                                                                                                                                                                                                                                                                                                                                                                                                                                                                                                                                                                                                                                                                                                                                                                                                                                 |
| posttranscriptional regulation of gene expression                                 | GO:0010608 | 8.25E-01 | 8.74E-01 | Tnf,21926:up Egfr,13649:down Vegfa,22339:down lgf1,16000:up                                                                                                                                                                                                                                                                                                                                                                                                                                                                                                                                                                                                                                                                                                                                                                                                                                                                                                                                                                                                                                                                                 |
| nucleobase-containing compound metabolic process                                  | GO:0006139 | 8.27E-01 | 8.76E-01 | Fstl3,83554:down Adm,11535:up Tfec,21426:up Sfrp4,20379:up Enpp5,83965:up Ankrd1,107765:down Lyl1,17095:up Gstt1,14871:up lgfbp3,16009:up Loxl2,94352:down Loxl3,16950:down Trf,22041:up Wnt5a,22418:down Adipoq,11450:up Bmp4,12159:up lgf1,16000:up Ptgir,19222:up Fgfr2,14183:up Htr2b,15559:down Prl2c2,18811:up Efemp1,216616:up Vdr,22337:down Fabp4,11770:up Nabp1,109019:down Htra2a,15558:down Oas3,246727:up Slc40a1,53945:up Gas6,14456:up Egfr,13649:down Sfrp1,20377:up Tgfb3,21814:up Tfrc,22042:up Sfrp2,20319:up Npnt,114249:up S100a1,20193:up Ice1,218333:down Ednrb,13618:up Pdgfc,54635:down Ampd3,11717:up Epas1,13819:up Uchl5,56207:up Htra3,78558:down Sdpr,20324:down Enpp3,209558:down Bmpr1a,12166:down Ccl4,20303:up Ret,19713:up Ppp3,67916:up Creb3l1,26427:down Kitl,17311:up Rasl11a,68895:up Inhba,16323:down Bnc2,242509:down Ccl3,20302:up Gfpt2,14584:down Vegfa,22339:down Cbr2,12409:up lgf2,16002:up Tnf,21926:up Pparg,19016:up Lmcd1,30937:up Glp1r,14652:down Fgfr1,14182:down Hmox1,15368:up Sulf1,240725:down Grem1,23892:up Phf11d,219132:up Tbx15,21384:down Enpp1,18605:down Uck2,80914:down |
| monocarboxylic acid catabolic process                                             | GO:0072329 | 8.27E-01 | 8.76E-01 | Adipoq,11450:up                                                                                                                                                                                                                                                                                                                                                                                                                                                                                                                                                                                                                                                                                                                                                                                                                                                                                                                                                                                                                                                                                                                             |
| translational initiation                                                          | GO:0006413 | 8.27E-01 | 8.76E-01 | Tnf,21926:up                                                                                                                                                                                                                                                                                                                                                                                                                                                                                                                                                                                                                                                                                                                                                                                                                                                                                                                                                                                                                                                                                                                                |
| pattern recognition receptor signaling pathway                                    | GO:0002221 | 8.34E-01 | 8.82E-01 | Tnf,21926:up                                                                                                                                                                                                                                                                                                                                                                                                                                                                                                                                                                                                                                                                                                                                                                                                                                                                                                                                                                                                                                                                                                                                |
| cellular macromolecule biosynthetic process                                       | GO:0034645 | 8.36E-01 | 8.83E-01 | Fstl3,83554:down Ice1,218333:down Tfec,21426:up Sfrp4,20379:up Pdgfc,54635:down Ednrb,13618:up Epas1,13819:up Ankrd1,107765:down Htra3,78558:down Uchl5,56207:up Lyl1,17095:up Sdpr,20324:down Man2a2,140481:up Loxl2,94352:down Loxl3,16950:down Trf,22041:up Wnt5a,22418:down Bmpr1a,12166:down Adipoq,11450:up Bmp4,12159:up lgf1,16000:up Chst11,58250:down Ret,19713:up Sdf2l1,64136:up Vegfb,22340:up Ppp3,67916:up Creb3l1,26427:down Fgfr2,14183:up Kitl,17311:up Prl2c2,18811:up Efemp1,216616:up Inhba,16323:down Rasl11a,68895:up Bnc2,242509:down Ccl3,20302:up Vdr,22337:down Fabp4,11770:up Vegfa,22339:down lgf2,16002:up Slc40a1,53945:up Pparg,19016:up Gas6,14456:up Tnf,21926:up Glp1r,14652:down Lmcd1,30937:up Fgfr1,14182:down Egfr,13649:down Has2,15117:down Hmox1,15368:up Sfrp1,20377:up Sulf1,240725:down Tgfb3,21814:up Grem1,23892:up Phf11d,219132:up Sfrp2,20319:up Tbx15,21384:down Npnt,114249:up Enpp1,18605:down S100a1,20193:up                                                                                                                                                                         |
| regulation of regulated secretory pathway                                         | GO:1903305 | 8.37E-01 | 8.84E-01 | Hmox1,15368:up                                                                                                                                                                                                                                                                                                                                                                                                                                                                                                                                                                                                                                                                                                                                                                                                                                                                                                                                                                                                                                                                                                                              |
| establishment of organelle localization                                           | GO:0051656 | 8.38E-01 | 8.85E-01 | Cd24a,12484:down Hmox1,15368:up Sytl3,80976:up Fgfr2,14183:up                                                                                                                                                                                                                                                                                                                                                                                                                                                                                                                                                                                                                                                                                                                                                                                                                                                                                                                                                                                                                                                                               |
| protein catabolic process                                                         | GO:0030163 | 8.38E-01 | 8.85E-01 | Tnf,21926:up Plk2,20620:down Egfr,13649:down Wnt5a,22418:down Ceacam1,26365:up Uchl5,56207:up Hpse,15442:up Sdf2l1,64136:up Serpine2,20720:up Adamts12,239337:down                                                                                                                                                                                                                                                                                                                                                                                                                                                                                                                                                                                                                                                                                                                                                                                                                                                                                                                                                                          |
| regulation of circadian rhythm                                                    | GO:0042752 | 8.40E-01 | 8.86E-01 | Pparg,19016:up                                                                                                                                                                                                                                                                                                                                                                                                                                                                                                                                                                                                                                                                                                                                                                                                                                                                                                                                                                                                                                                                                                                              |
| negative regulation of cell cycle phase transition                                | GO:1901988 | 8.40E-01 | 8.86E-01 | Susd2,71733:up                                                                                                                                                                                                                                                                                                                                                                                                                                                                                                                                                                                                                                                                                                                                                                                                                                                                                                                                                                                                                                                                                                                              |
| innate immune response-activating signal transduction                             | GO:0002758 | 8.40E-01 | 8.86E-01 | Tnf,21926:up                                                                                                                                                                                                                                                                                                                                                                                                                                                                                                                                                                                                                                                                                                                                                                                                                                                                                                                                                                                                                                                                                                                                |
| membrane fusion                                                                   | GO:0061025 | 8.40E-01 | 8.86E-01 | Gas6,14456:up Sytl3,80976:up                                                                                                                                                                                                                                                                                                                                                                                                                                                                                                                                                                                                                                                                                                                                                                                                                                                                                                                                                                                                                                                                                                                |

|                                                                          |            |          |          |                                                                                                                                                                                                                                                                                                                                                                                                                                                                                                                                                                                                                                                                                                                                                                                                                                                                  |
|--------------------------------------------------------------------------|------------|----------|----------|------------------------------------------------------------------------------------------------------------------------------------------------------------------------------------------------------------------------------------------------------------------------------------------------------------------------------------------------------------------------------------------------------------------------------------------------------------------------------------------------------------------------------------------------------------------------------------------------------------------------------------------------------------------------------------------------------------------------------------------------------------------------------------------------------------------------------------------------------------------|
| regulation of defense response to virus by host                          | GO:0050691 | 8.43E-01 | 8.89E-01 | Lmcd1,30937:up                                                                                                                                                                                                                                                                                                                                                                                                                                                                                                                                                                                                                                                                                                                                                                                                                                                   |
| action potential                                                         | GO:001508  | 8.45E-01 | 8.91E-01 | Tnf,21926:up                                                                                                                                                                                                                                                                                                                                                                                                                                                                                                                                                                                                                                                                                                                                                                                                                                                     |
| regulation of response to nutrient levels                                | GO:0032107 | 8.45E-01 | 8.91E-01 | Hmox1,15368:up                                                                                                                                                                                                                                                                                                                                                                                                                                                                                                                                                                                                                                                                                                                                                                                                                                                   |
| regulation of response to extracellular stimulus                         | GO:0032104 | 8.45E-01 | 8.91E-01 | Hmox1,15368:up                                                                                                                                                                                                                                                                                                                                                                                                                                                                                                                                                                                                                                                                                                                                                                                                                                                   |
| sensory perception of smell                                              | GO:0007608 | 8.45E-01 | 8.91E-01 | Igf1,16000:up                                                                                                                                                                                                                                                                                                                                                                                                                                                                                                                                                                                                                                                                                                                                                                                                                                                    |
| microtubule organizing center organization                               | GO:0031023 | 8.45E-01 | 8.91E-01 | Plk2,20620:down                                                                                                                                                                                                                                                                                                                                                                                                                                                                                                                                                                                                                                                                                                                                                                                                                                                  |
| regulation of proteolysis involved in cellular protein catabolic process | GO:1903050 | 8.47E-01 | 8.92E-01 | Uchl5,56207:up Plk2,20620:down                                                                                                                                                                                                                                                                                                                                                                                                                                                                                                                                                                                                                                                                                                                                                                                                                                   |
| single-organism membrane organization                                    | GO:0044802 | 8.49E-01 | 8.94E-01 | Tnf,21926:up Gas6,14456:up Cd24a,12484:down Ccl2,20296:up Adipoq,11450:up Col5a1,12831:down Tgfb2,21808:down Lrrc15,74488:down Synt13,80976:up                                                                                                                                                                                                                                                                                                                                                                                                                                                                                                                                                                                                                                                                                                                   |
| protein homooligomerization                                              | GO:0051260 | 8.51E-01 | 8.96E-01 | Hmox1,15368:up Dpysl3,22240:down Adipoq,11450:up                                                                                                                                                                                                                                                                                                                                                                                                                                                                                                                                                                                                                                                                                                                                                                                                                 |
| signal transduction by p53 class mediator                                | GO:0072331 | 8.51E-01 | 8.96E-01 | Ankrd1,107765:down                                                                                                                                                                                                                                                                                                                                                                                                                                                                                                                                                                                                                                                                                                                                                                                                                                               |
| positive regulation of cellular protein catabolic process                | GO:1903364 | 8.54E-01 | 8.98E-01 | Plk2,20620:down                                                                                                                                                                                                                                                                                                                                                                                                                                                                                                                                                                                                                                                                                                                                                                                                                                                  |
| mitotic cell cycle phase transition                                      | GO:0044772 | 8.54E-01 | 8.98E-01 | Plk2,20620:down Egfr,13649:down Inhba,16323:down                                                                                                                                                                                                                                                                                                                                                                                                                                                                                                                                                                                                                                                                                                                                                                                                                 |
| regulation of translation                                                | GO:0006417 | 8.56E-01 | 9.00E-01 | Tnf,21926:up Egfr,13649:down Igf1,16000:up                                                                                                                                                                                                                                                                                                                                                                                                                                                                                                                                                                                                                                                                                                                                                                                                                       |
| protein modification by small protein removal                            | GO:0070646 | 8.56E-01 | 9.00E-01 | Uchl5,56207:up                                                                                                                                                                                                                                                                                                                                                                                                                                                                                                                                                                                                                                                                                                                                                                                                                                                   |
| membrane organization                                                    | GO:0061024 | 8.58E-01 | 9.01E-01 | Tnf,21926:up Pparg,19016:up Gas6,14456:up Cd24a,12484:down Ccl2,20296:up Adipoq,11450:up Col5a1,12831:down Tgfb2,21808:down Lrrc15,74488:down Synt13,80976:up                                                                                                                                                                                                                                                                                                                                                                                                                                                                                                                                                                                                                                                                                                    |
| activation of innate immune response                                     | GO:0002218 | 8.59E-01 | 9.02E-01 | Tnf,21926:up                                                                                                                                                                                                                                                                                                                                                                                                                                                                                                                                                                                                                                                                                                                                                                                                                                                     |
| secondary alcohol metabolic process                                      | GO:1902652 | 8.59E-01 | 9.02E-01 | Fgfr1,14182:down                                                                                                                                                                                                                                                                                                                                                                                                                                                                                                                                                                                                                                                                                                                                                                                                                                                 |
| neuromuscular process                                                    | GO:0050905 | 8.62E-01 | 9.03E-01 | Aldh1a3,56847:down                                                                                                                                                                                                                                                                                                                                                                                                                                                                                                                                                                                                                                                                                                                                                                                                                                               |
| sphingolipid metabolic process                                           | GO:0006665 | 8.69E-01 | 9.10E-01 | Serinc2,230779:down                                                                                                                                                                                                                                                                                                                                                                                                                                                                                                                                                                                                                                                                                                                                                                                                                                              |
| positive regulation of organelle organization                            | GO:0010638 | 8.71E-01 | 9.12E-01 | Tnf,21926:up Lmcd1,30937:up Wnt5a,22418:down Sfrp4,20379:up Igf1,16000:up Plod2,26432:down Vegfa,22339:down Igf2,16002:up                                                                                                                                                                                                                                                                                                                                                                                                                                                                                                                                                                                                                                                                                                                                        |
| calcium ion-dependent exocytosis                                         | GO:0017156 | 8.71E-01 | 9.12E-01 | Synt13,80976:up                                                                                                                                                                                                                                                                                                                                                                                                                                                                                                                                                                                                                                                                                                                                                                                                                                                  |
| regulation of protein stability                                          | GO:0031647 | 8.73E-01 | 9.13E-01 | Plpp3,67916:up Igf1,16000:up                                                                                                                                                                                                                                                                                                                                                                                                                                                                                                                                                                                                                                                                                                                                                                                                                                     |
| negative regulation of organelle organization                            | GO:0010639 | 8.75E-01 | 9.15E-01 | Fgfr2,14183:up Igf1,16000:up Bmp4,12159:up                                                                                                                                                                                                                                                                                                                                                                                                                                                                                                                                                                                                                                                                                                                                                                                                                       |
| regulation of cell cycle phase transition                                | GO:1901987 | 8.78E-01 | 9.18E-01 | Egfr,13649:down Susd2,71733:up                                                                                                                                                                                                                                                                                                                                                                                                                                                                                                                                                                                                                                                                                                                                                                                                                                   |
| nuclear export                                                           | GO:0051168 | 8.81E-01 | 9.20E-01 | Gas6,14456:up                                                                                                                                                                                                                                                                                                                                                                                                                                                                                                                                                                                                                                                                                                                                                                                                                                                    |
| protein tetramerization                                                  | GO:0051262 | 8.81E-01 | 9.20E-01 | Cbr2,12409:up                                                                                                                                                                                                                                                                                                                                                                                                                                                                                                                                                                                                                                                                                                                                                                                                                                                    |
| actin filament bundle assembly                                           | GO:0051017 | 8.81E-01 | 9.20E-01 | Dpysl3,22240:down                                                                                                                                                                                                                                                                                                                                                                                                                                                                                                                                                                                                                                                                                                                                                                                                                                                |
| RNA metabolic process                                                    | GO:0016070 | 8.81E-01 | 9.20E-01 | Fstl3,83554:down Icfe1,218333:down Tfec,21426:up Sfrp4,20379:up Ednrb,13618:up Epas1,13819:up Ankrd1,107765:down Htra3,78558:down Uchl5,56207:up Lyl1,17095:up Sdpr,20324:down Loxl2,94352:down Loxl3,16950:down Trf,22041:up Wnt5a,22418:down Bmpr1a,12166:down Ccl4,20303:up Adipoq,11450:up Bmp4,12159:up Igf1,16000:up Ret,19713:up Plpp3,67916:up Creb3l1,26427:down Fgfr2,14183:up Prl2c2,18811:up Efemp1,216616:up Inhba,16323:down Rasl11a,68895:up Bnc2,242509:down Ccl3,20302:up Vdr,22337:down Fabp4,11770:up Vegfa,22339:down Oas3,246727:up Igf2,16002:up Slc40a1,53945:up Pparg,19016:up Gas6,14456:up Tnf,21926:up Glp1r,14652:down Lmcd1,30937:up Fgfr1,14182:down Egfr,13649:down Hmox1,15368:up Sfrp1,20377:up Sulf1,240725:down Tgfb3,21814:up Grem1,23892:up Phf11d,219132:up Sfrp2,20319:up Tbx15,21384:down Npnt,114249:up S100a1,20193:up |
| feeding behavior                                                         | GO:0007631 | 8.83E-01 | 9.22E-01 | Glp1r,14652:down                                                                                                                                                                                                                                                                                                                                                                                                                                                                                                                                                                                                                                                                                                                                                                                                                                                 |
| spindle organization                                                     | GO:0007051 | 8.85E-01 | 9.24E-01 | Plk2,20620:down                                                                                                                                                                                                                                                                                                                                                                                                                                                                                                                                                                                                                                                                                                                                                                                                                                                  |
| regulation of cellular protein catabolic process                         | GO:1903362 | 8.85E-01 | 9.24E-01 | Uchl5,56207:up Plk2,20620:down                                                                                                                                                                                                                                                                                                                                                                                                                                                                                                                                                                                                                                                                                                                                                                                                                                   |
| immune response-regulating cell surface receptor signaling pathway       | GO:0002768 | 8.87E-01 | 9.26E-01 | Clec4e,56619:up                                                                                                                                                                                                                                                                                                                                                                                                                                                                                                                                                                                                                                                                                                                                                                                                                                                  |



|                                                                         |             |          |          |                                                                                                                                                                                                                                                                                                                                                                                                                                                                                                                                                                                                                                                                                                                                                                                                                                                                                                                                                           |
|-------------------------------------------------------------------------|-------------|----------|----------|-----------------------------------------------------------------------------------------------------------------------------------------------------------------------------------------------------------------------------------------------------------------------------------------------------------------------------------------------------------------------------------------------------------------------------------------------------------------------------------------------------------------------------------------------------------------------------------------------------------------------------------------------------------------------------------------------------------------------------------------------------------------------------------------------------------------------------------------------------------------------------------------------------------------------------------------------------------|
| cofactor biosynthetic process                                           | GO:0051188  | 8.89E-01 | 9.27E-01 | Pdxk,216134:up                                                                                                                                                                                                                                                                                                                                                                                                                                                                                                                                                                                                                                                                                                                                                                                                                                                                                                                                            |
| macromolecular complex subunit organization                             | GO:0043933  | 8.90E-01 | 9.28E-01 | Fam101b,76566:down P4ha1,18451:down Col5a2,12832:down lce1,218333:down Pdgfc,54635:down Dpysl3,22240:down Mgp,17313:up Serpinh1,12406:down Shroom4,208431:down Vegfa,22339:down Cbr2,12409:up Tnf,21926:up Loxl2,94352:down Plk2,20620:down Col1a2,12843:down Trf,22041:up Cd24a,12484:down Col11a1,12814:down Ncam1,17967:down Hmox1,15368:up Lpl,16956:up C1qtnf3,81799:down Tgfr3,21814:up C1qtnf6,72709:down Grem1,23892:up Adipoq,11450:up Col3a1,12825:down Sfrp2,20319:up Col5a1,12831:down Tgfb2,21808:down                                                                                                                                                                                                                                                                                                                                                                                                                                       |
| regulation of histone modification                                      | GO:0031056  | 8.91E-01 | 9.29E-01 | Vegfa,22339:down                                                                                                                                                                                                                                                                                                                                                                                                                                                                                                                                                                                                                                                                                                                                                                                                                                                                                                                                          |
| nuclear division                                                        | GO:000280   | 8.92E-01 | 9.30E-01 | Tnf,21926:up Wnt5a,22418:down lcf2,16002:up Fgfr2,14183:up lcf1,16000:up Bmp4,12159:up                                                                                                                                                                                                                                                                                                                                                                                                                                                                                                                                                                                                                                                                                                                                                                                                                                                                    |
| negative regulation of translation                                      | GO:0017148  | 8.93E-01 | 9.30E-01 | Egfr,13649:down                                                                                                                                                                                                                                                                                                                                                                                                                                                                                                                                                                                                                                                                                                                                                                                                                                                                                                                                           |
| regulation of cellular amide metabolic process                          | GO:0034248  | 8.95E-01 | 9.32E-01 | Tnf,21926:up Egfr,13649:down lcf1,16000:up                                                                                                                                                                                                                                                                                                                                                                                                                                                                                                                                                                                                                                                                                                                                                                                                                                                                                                                |
| protein complex disassembly                                             | GO:0043241  | 8.99E-01 | 9.35E-01 | Tnf,21926:up                                                                                                                                                                                                                                                                                                                                                                                                                                                                                                                                                                                                                                                                                                                                                                                                                                                                                                                                              |
| vesicle fusion                                                          | GO:0006906  | 9.01E-01 | 9.37E-01 | Syt13,80976:up                                                                                                                                                                                                                                                                                                                                                                                                                                                                                                                                                                                                                                                                                                                                                                                                                                                                                                                                            |
| immune response-regulating signaling pathway                            | GO:0002764  | 9.01E-01 | 9.37E-01 | Tnf,21926:up Clec4e,56619:up                                                                                                                                                                                                                                                                                                                                                                                                                                                                                                                                                                                                                                                                                                                                                                                                                                                                                                                              |
| cytoskeleton organization                                               | GO:0007010  | 9.01E-01 | 9.37E-01 | Fam101b,76566:down Tnf,21926:up Plk2,20620:down Trf,22041:up Sfrp1,20377:up Ptk7,71461:down Ccl2,20296:up Ccl12,20293:up Dpysl3,22240:down Mark1,226778:up Gpm6b,14758:up Shroom4,208431:down Tgfb2,21808:down                                                                                                                                                                                                                                                                                                                                                                                                                                                                                                                                                                                                                                                                                                                                            |
| exocytosis                                                              | GO:0006887  | 9.01E-01 | 9.37E-01 | Ncam1,17967:down Hmox1,15368:up Syt13,80976:up                                                                                                                                                                                                                                                                                                                                                                                                                                                                                                                                                                                                                                                                                                                                                                                                                                                                                                            |
| retina development in camera-type eye                                   | GO:0060041  | 9.02E-01 | 9.38E-01 | Vegfa,22339:down                                                                                                                                                                                                                                                                                                                                                                                                                                                                                                                                                                                                                                                                                                                                                                                                                                                                                                                                          |
| cellular response to DNA damage stimulus                                | GO:0006974  | 9.03E-01 | 9.39E-01 | Ankrd1,107765:down Uchl5,56207:up Tnf,21926:up Egfr,13649:down Cxcl12,20315:up Hmox1,15368:up Nabp1,109019:down                                                                                                                                                                                                                                                                                                                                                                                                                                                                                                                                                                                                                                                                                                                                                                                                                                           |
| organelle membrane fusion                                               | GO:0090174  | 9.04E-01 | 9.39E-01 | Syt13,80976:up                                                                                                                                                                                                                                                                                                                                                                                                                                                                                                                                                                                                                                                                                                                                                                                                                                                                                                                                            |
| cellular potassium ion transport                                        | GO:00071804 | 9.06E-01 | 9.41E-01 | Kcnj15,16516:down                                                                                                                                                                                                                                                                                                                                                                                                                                                                                                                                                                                                                                                                                                                                                                                                                                                                                                                                         |
| potassium ion transmembrane transport                                   | GO:00071805 | 9.06E-01 | 9.41E-01 | Kcnj15,16516:down                                                                                                                                                                                                                                                                                                                                                                                                                                                                                                                                                                                                                                                                                                                                                                                                                                                                                                                                         |
| protein complex biogenesis                                              | GO:00070271 | 9.07E-01 | 9.42E-01 | Tnf,21926:up lce1,218333:down Col1a2,12843:down Cd24a,12484:down Ncam1,17967:down Hmox1,15368:up C1qtnf3,81799:down Tgfr3,21814:up C1qtnf6,72709:down Pdgfc,54635:down Dpysl3,22240:down Mgp,17313:up Adipoq,11450:up Vegfa,22339:down Cbr2,12409:up                                                                                                                                                                                                                                                                                                                                                                                                                                                                                                                                                                                                                                                                                                      |
| protein complex assembly                                                | GO:0006461  | 9.07E-01 | 9.42E-01 | Tnf,21926:up lce1,218333:down Col1a2,12843:down Cd24a,12484:down Ncam1,17967:down Hmox1,15368:up C1qtnf3,81799:down Tgfr3,21814:up C1qtnf6,72709:down Pdgfc,54635:down Dpysl3,22240:down Mgp,17313:up Adipoq,11450:up Vegfa,22339:down Cbr2,12409:up                                                                                                                                                                                                                                                                                                                                                                                                                                                                                                                                                                                                                                                                                                      |
| negative regulation of cellular amide metabolic process                 | GO:0034249  | 9.08E-01 | 9.42E-01 | Egfr,13649:down                                                                                                                                                                                                                                                                                                                                                                                                                                                                                                                                                                                                                                                                                                                                                                                                                                                                                                                                           |
| nucleic acid metabolic process                                          | GO:00090304 | 9.08E-01 | 9.42E-01 | Fstl3,83554:down lce1,218333:down Tfec,21426:up Sfrp4,20379:up Pdgfc,54635:down Ednrb,13618:up Epas1,13819:up Ankrd1,107765:down Htra3,78558:down Uchl5,56207:up Lyl1,17095:up Gstt1,14871:up Sdpr,20324:down lcf3,16009:up Loxl2,94352:down Loxl3,16950:down Trf,22041:up Wnt5a,22418:down Bmpr1a,12166:down Ccl4,20303:up Adipoq,11450:up Bmp4,12159:up lcf1,16000:up Ret,19713:up Ppp3,67916:up Creb3l1,26427:down Fgfr2,14183:up Kitl,17311:up Prl2c2,18811:up Efemp1,216616:up Inhba,16323:down Ras11a,68895:up Bnc2,242509:down Ccl3,20302:up Vdr,22337:down Fabp4,11770:up Nabp1,109019:down Vegfa,22339:down Oas3,246727:up lcf2,16002:up Slc40a1,53945:up Pparg,19016:up Gas6,14456:up Tnf,21926:up Glp1r,14652:down Lmcd1,30937:up Fgfr1,14182:down Egfr,13649:down Hmox1,15368:up Sfrp1,20377:up Sulf1,240725:down Tgfr3,21814:up Tfrc,22042:up Grem1,23892:up Phf11d,219132:up Sfrp2,20319:up Tbx15,21384:down Npnt,114249:up S100a1,20193:up |
| regulation of dendrite development                                      | GO:0050773  | 9.09E-01 | 9.43E-01 | Plk2,20620:down                                                                                                                                                                                                                                                                                                                                                                                                                                                                                                                                                                                                                                                                                                                                                                                                                                                                                                                                           |
| regulation of chromatin modification                                    | GO:0003308  | 9.09E-01 | 9.43E-01 | Vegfa,22339:down                                                                                                                                                                                                                                                                                                                                                                                                                                                                                                                                                                                                                                                                                                                                                                                                                                                                                                                                          |
| regulation of microtubule cytoskeleton organization                     | GO:00070507 | 9.13E-01 | 9.46E-01 | Plk2,20620:down                                                                                                                                                                                                                                                                                                                                                                                                                                                                                                                                                                                                                                                                                                                                                                                                                                                                                                                                           |
| positive regulation of chromosome organization                          | GO:0001252  | 9.13E-01 | 9.46E-01 | Vegfa,22339:down                                                                                                                                                                                                                                                                                                                                                                                                                                                                                                                                                                                                                                                                                                                                                                                                                                                                                                                                          |
| nucleobase-containing compound transport                                | GO:00015931 | 9.14E-01 | 9.48E-01 | Slc29a1,63959:up                                                                                                                                                                                                                                                                                                                                                                                                                                                                                                                                                                                                                                                                                                                                                                                                                                                                                                                                          |
| macromolecular complex disassembly                                      | GO:00032984 | 9.16E-01 | 9.49E-01 | Tnf,21926:up                                                                                                                                                                                                                                                                                                                                                                                                                                                                                                                                                                                                                                                                                                                                                                                                                                                                                                                                              |
| regulation of proteasomal ubiquitin-dependent protein catabolic process | GO:00032434 | 9.19E-01 | 9.52E-01 | Plk2,20620:down                                                                                                                                                                                                                                                                                                                                                                                                                                                                                                                                                                                                                                                                                                                                                                                                                                                                                                                                           |
| regulation of chromatin organization                                    | GO:0002275  | 9.19E-01 | 9.52E-01 | Vegfa,22339:down                                                                                                                                                                                                                                                                                                                                                                                                                                                                                                                                                                                                                                                                                                                                                                                                                                                                                                                                          |

|                                                   |            |          |          |                                                                                                                                                                                                                                                                                                                                                                                                                                                                                                                                                                                                                                                                                                                                                                                                                                                                                                                                                                                                                     |
|---------------------------------------------------|------------|----------|----------|---------------------------------------------------------------------------------------------------------------------------------------------------------------------------------------------------------------------------------------------------------------------------------------------------------------------------------------------------------------------------------------------------------------------------------------------------------------------------------------------------------------------------------------------------------------------------------------------------------------------------------------------------------------------------------------------------------------------------------------------------------------------------------------------------------------------------------------------------------------------------------------------------------------------------------------------------------------------------------------------------------------------|
| gene silencing                                    | GO:0016458 | 9.20E-01 | 9.52E-01 | Egfr,13649:down                                                                                                                                                                                                                                                                                                                                                                                                                                                                                                                                                                                                                                                                                                                                                                                                                                                                                                                                                                                                     |
| organelle localization                            | GO:0051640 | 9.26E-01 | 9.56E-01 | Cd24a,12484:down Hmox1,15368:up Syt13,80976:up Fgfr2,14183:up                                                                                                                                                                                                                                                                                                                                                                                                                                                                                                                                                                                                                                                                                                                                                                                                                                                                                                                                                       |
| membrane lipid metabolic process                  | GO:0006643 | 9.30E-01 | 9.60E-01 | Serinc2,230779:down                                                                                                                                                                                                                                                                                                                                                                                                                                                                                                                                                                                                                                                                                                                                                                                                                                                                                                                                                                                                 |
| organelle fission                                 | GO:0048285 | 9.30E-01 | 9.60E-01 | Tnf,21926:up Wnt5a,22418:down Igf2,16002:up Fgfr2,14183:up Igf1,16000:up Bmp4,12159:up                                                                                                                                                                                                                                                                                                                                                                                                                                                                                                                                                                                                                                                                                                                                                                                                                                                                                                                              |
| vesicle organization                              | GO:0016050 | 9.32E-01 | 9.61E-01 | Serpine2,20720:up Syt13,80976:up                                                                                                                                                                                                                                                                                                                                                                                                                                                                                                                                                                                                                                                                                                                                                                                                                                                                                                                                                                                    |
| double-strand break repair                        | GO:0006302 | 9.32E-01 | 9.62E-01 | Nabp1,109019:down                                                                                                                                                                                                                                                                                                                                                                                                                                                                                                                                                                                                                                                                                                                                                                                                                                                                                                                                                                                                   |
| macromolecule catabolic process                   | GO:0009057 | 9.39E-01 | 9.68E-01 | Tnf,21926:up Plk2,20620:down Egfr,13649:down Wnt5a,22418:down Ceacam1,26365:up Uchl5,56207:up Hpse,15442:up Sdf2l1,64136:up Igf1,16000:up Serpine2,20720:up Adamts12,239337:down                                                                                                                                                                                                                                                                                                                                                                                                                                                                                                                                                                                                                                                                                                                                                                                                                                    |
| regulation of actin cytoskeleton organization     | GO:0032956 | 9.41E-01 | 9.69E-01 | Gpm6b,14758:up Tgfb2,21808:down                                                                                                                                                                                                                                                                                                                                                                                                                                                                                                                                                                                                                                                                                                                                                                                                                                                                                                                                                                                     |
| mitochondrion organization                        | GO:0007005 | 9.43E-01 | 9.71E-01 | Lmcd1,30937:up Cd24a,12484:down Plod2,26432:down Sfrp4,20379:up Igf1,16000:up Epas1,13819:up                                                                                                                                                                                                                                                                                                                                                                                                                                                                                                                                                                                                                                                                                                                                                                                                                                                                                                                        |
| regulation of microtubule-based process           | GO:0032886 | 9.44E-01 | 9.72E-01 | Plk2,20620:down                                                                                                                                                                                                                                                                                                                                                                                                                                                                                                                                                                                                                                                                                                                                                                                                                                                                                                                                                                                                     |
| skeletal muscle tissue development                | GO:0007519 | 9.44E-01 | 9.72E-01 | Ankrd1,107765:down                                                                                                                                                                                                                                                                                                                                                                                                                                                                                                                                                                                                                                                                                                                                                                                                                                                                                                                                                                                                  |
| cellular amide metabolic process                  | GO:0043603 | 9.45E-01 | 9.72E-01 | Ggt5,23887:up Tnf,21926:up Egfr,13649:down Mme,17380:up Mmp13,17386:up Igf1,16000:up Gstm1,14862:up Gstt1,14871:up Anpep,16790:up                                                                                                                                                                                                                                                                                                                                                                                                                                                                                                                                                                                                                                                                                                                                                                                                                                                                                   |
| single-organism membrane fusion                   | GO:0044801 | 9.48E-01 | 9.75E-01 | Syt13,80976:up                                                                                                                                                                                                                                                                                                                                                                                                                                                                                                                                                                                                                                                                                                                                                                                                                                                                                                                                                                                                      |
| meiotic nuclear division                          | GO:0007126 | 9.50E-01 | 9.76E-01 | Wnt5a,22418:down                                                                                                                                                                                                                                                                                                                                                                                                                                                                                                                                                                                                                                                                                                                                                                                                                                                                                                                                                                                                    |
| skeletal muscle organ development                 | GO:0060538 | 9.50E-01 | 9.76E-01 | Ankrd1,107765:down                                                                                                                                                                                                                                                                                                                                                                                                                                                                                                                                                                                                                                                                                                                                                                                                                                                                                                                                                                                                  |
| regulation of organelle organization              | GO:0033043 | 9.50E-01 | 9.77E-01 | Tnf,21926:up Plk2,20620:down Lmcd1,30937:up Wnt5a,22418:down Sfrp4,20379:up Igf1,16000:up Bmp4,12159:up Gpm6b,14758:up Plod2,26432:down Vegfa,22339:down Tgfb2,21808:down Fgfr2,14183:up Igf2,16002:up                                                                                                                                                                                                                                                                                                                                                                                                                                                                                                                                                                                                                                                                                                                                                                                                              |
| organelle fusion                                  | GO:0048284 | 9.51E-01 | 9.77E-01 | Syt13,80976:up                                                                                                                                                                                                                                                                                                                                                                                                                                                                                                                                                                                                                                                                                                                                                                                                                                                                                                                                                                                                      |
| gene expression                                   | GO:0010467 | 9.53E-01 | 9.79E-01 | Fstl3,83554:down Ice1,218333:down Tfec,21426:up Sfrp4,20379:up Aldh1a2,19378:up C3,12266:up Ednrb,13618:up Epas1,13819:up Ankrd1,107765:down Htra3,78558:down Serpinh1,12406:down Uchl5,56207:up Lyl1,17095:up Sdpr,20324:down Loxl2,94352:down Loxl3,16950:down Trf,22041:up Wnt5a,22418:down Bmpr1a,12166:down Ccl4,20303:up Adipoq,11450:up Bmp4,12159:up Igf1,16000:up Tnc,21923:down Ret,19713:up Tgfb2,21808:down Plpp3,67916:up Creb3l1,26427:down F3,14066:up Fgfr2,14183:up Pri2c2,18811:up Efemp1,216616:up Inhba,16323:down Rasl11a,68895:up Bnc2,242509:down Plat,18791:down Ccl3,20302:up Vdr,22337:down Ctla2a,13024:down Fabp4,11770:up Vegfa,22339:down Serpine2,20720:up Igf2,16002:up Slc40a1,53945:up Pparg,19016:up Gas6,14456:up Tnf,21926:up Glp1r,14652:down Lmcd1,30937:up Fgfr1,14182:down Egfr,13649:down Hmox1,15368:up Sfrp1,20377:up Sulf1,240725:down Tgfb3,21814:up Grem1,23892:up Phf11d,219132:up Sfrp2,20319:up Tbx15,21384:down Serping1,12258:up Npn1,114249:up S100a1,20193:up |
| meiotic cell cycle process                        | GO:1903046 | 9.56E-01 | 9.82E-01 | Wnt5a,22418:down                                                                                                                                                                                                                                                                                                                                                                                                                                                                                                                                                                                                                                                                                                                                                                                                                                                                                                                                                                                                    |
| proteasomal protein catabolic process             | GO:0010498 | 9.57E-01 | 9.83E-01 | Uchl5,56207:up Plk2,20620:down Sdf2l1,64136:up                                                                                                                                                                                                                                                                                                                                                                                                                                                                                                                                                                                                                                                                                                                                                                                                                                                                                                                                                                      |
| cell cycle                                        | GO:0007049 | 9.60E-01 | 9.85E-01 | Hpgd,15446:up Inhba,16323:down Nabp1,109019:down Igf2,16002:up Tnf,21926:up Plk2,20620:down Egfr,13649:down Fgfr1,14182:down Sfrp1,20377:up Susd2,71733:up Wnt5a,22418:down Ptgs2,19225:down Bmp4,12159:up Igf1,16000:up Tgfb2,21808:down Fgfr2,14183:up                                                                                                                                                                                                                                                                                                                                                                                                                                                                                                                                                                                                                                                                                                                                                            |
| regulation of mitotic cell cycle phase transition | GO:1901990 | 9.63E-01 | 9.88E-01 | Egfr,13649:down                                                                                                                                                                                                                                                                                                                                                                                                                                                                                                                                                                                                                                                                                                                                                                                                                                                                                                                                                                                                     |
| DNA repair                                        | GO:0006281 | 9.64E-01 | 9.88E-01 | Uchl5,56207:up Egfr,13649:down Nabp1,109019:down                                                                                                                                                                                                                                                                                                                                                                                                                                                                                                                                                                                                                                                                                                                                                                                                                                                                                                                                                                    |
| regulation of protein ubiquitination              | GO:0031396 | 9.65E-01 | 9.89E-01 | Nxn,18230:down                                                                                                                                                                                                                                                                                                                                                                                                                                                                                                                                                                                                                                                                                                                                                                                                                                                                                                                                                                                                      |
| regulation of gene expression, epigenetic         | GO:0040029 | 9.67E-01 | 9.90E-01 | Egfr,13649:down                                                                                                                                                                                                                                                                                                                                                                                                                                                                                                                                                                                                                                                                                                                                                                                                                                                                                                                                                                                                     |
| sensory perception of chemical stimulus           | GO:0007606 | 9.68E-01 | 9.91E-01 | Igf1,16000:up                                                                                                                                                                                                                                                                                                                                                                                                                                                                                                                                                                                                                                                                                                                                                                                                                                                                                                                                                                                                       |
| Golgi vesicle transport                           | GO:0048193 | 9.68E-01 | 9.91E-01 | Sec23a,20334:down                                                                                                                                                                                                                                                                                                                                                                                                                                                                                                                                                                                                                                                                                                                                                                                                                                                                                                                                                                                                   |
| regulation of cytoskeleton organization           | GO:0051493 | 9.70E-01 | 9.94E-01 | Plk2,20620:down Gpm6b,14758:up Tgfb2,21808:down                                                                                                                                                                                                                                                                                                                                                                                                                                                                                                                                                                                                                                                                                                                                                                                                                                                                                                                                                                     |
| protein dephosphorylation                         | GO:0006470 | 9.74E-01 | 9.96E-01 | Tnf,21926:up                                                                                                                                                                                                                                                                                                                                                                                                                                                                                                                                                                                                                                                                                                                                                                                                                                                                                                                                                                                                        |
| immune response-activating signal transduction    | GO:0002757 | 9.76E-01 | 9.99E-01 | Tnf,21926:up                                                                                                                                                                                                                                                                                                                                                                                                                                                                                                                                                                                                                                                                                                                                                                                                                                                                                                                                                                                                        |
| dendrite development                              | GO:0016358 | 9.76E-01 | 9.99E-01 | Plk2,20620:down                                                                                                                                                                                                                                                                                                                                                                                                                                                                                                                                                                                                                                                                                                                                                                                                                                                                                                                                                                                                     |

|                                                                            |            |          |          |                                                                                                                                                                                                                                                                                                                                                                                                                                                           |
|----------------------------------------------------------------------------|------------|----------|----------|-----------------------------------------------------------------------------------------------------------------------------------------------------------------------------------------------------------------------------------------------------------------------------------------------------------------------------------------------------------------------------------------------------------------------------------------------------------|
| regulation of protein modification by small protein conjugation or removal | GO:1903320 | 9.77E-01 | 9.99E-01 | Nxn,18230:down                                                                                                                                                                                                                                                                                                                                                                                                                                            |
| meiotic cell cycle                                                         | GO:0051321 | 9.78E-01 | 9.99E-01 | Wnt5a,22418:down                                                                                                                                                                                                                                                                                                                                                                                                                                          |
| macromolecular complex assembly                                            | GO:0065003 | 9.81E-01 | 1.00E+00 | Tnf,21926:up lce1,218333:down Col1a2,12843:down Cd24a,12484:down Ncam1,17967:down Hmox1,15368:up C1qtnf3,81799:down Tgfb3,21814:up C1qtnf6,72709:down Pdgfc,54635:down Dpysl3,22240:down Mgp,17313:up Adipoq,11450:up Vegfa,22339:down Cbr2,12409:up                                                                                                                                                                                                      |
| proteasome-mediated ubiquitin-dependent protein catabolic process          | GO:0043161 | 9.82E-01 | 1.00E+00 | Plk2,20620:down Sdf2l1,64136:up                                                                                                                                                                                                                                                                                                                                                                                                                           |
| vacuolar transport                                                         | GO:0007034 | 9.82E-01 | 1.00E+00 | Fgfr1,14182:down                                                                                                                                                                                                                                                                                                                                                                                                                                          |
| cellular component assembly                                                | GO:0022607 | 9.84E-01 | 1.00E+00 | Prl2c2,18811:up lce1,218333:down Flrt2,399558:down Plxnd1,67784:up Pdgfc,54635:down Dpysl3,22240:down Mgp,17313:up Srxp2,68792:down Gpm6b,14758:up Vegfa,22339:down Cbr2,12409:up Tnf,21926:up Col1a2,12843:down Plk2,20620:down Cd24a,12484:down Hmox1,15368:up Has2,15117:down Ncam1,17967:down C1qtnf3,81799:down Wnt5a,22418:down Tgfb3,21814:up C1qtnf6,72709:down Grem1,23892:up Adipoq,11450:up Thbs2,21826:down                                   |
| histone modification                                                       | GO:0016570 | 9.85E-01 | 1.00E+00 | Loxl2,94352:down Vegfa,22339:down                                                                                                                                                                                                                                                                                                                                                                                                                         |
| cell projection assembly                                                   | GO:0030031 | 9.86E-01 | 1.00E+00 | Prl2c2,18811:up Dpysl3,22240:down                                                                                                                                                                                                                                                                                                                                                                                                                         |
| cellular protein complex assembly                                          | GO:0043623 | 9.86E-01 | 1.00E+00 | Ncam1,17967:down Tgfb3,21814:up Pdgfc,54635:down                                                                                                                                                                                                                                                                                                                                                                                                          |
| peptide biosynthetic process                                               | GO:0043043 | 9.87E-01 | 1.00E+00 | Ggt5,23887:up Tnf,21926:up Egfr,13649:down lgf1,16000:up                                                                                                                                                                                                                                                                                                                                                                                                  |
| regulation of chromosome organization                                      | GO:0033044 | 9.88E-01 | 1.00E+00 | Vegfa,22339:down                                                                                                                                                                                                                                                                                                                                                                                                                                          |
| cellular component biogenesis                                              | GO:0044085 | 9.90E-01 | 1.00E+00 | Prl2c2,18811:up lce1,218333:down Flrt2,399558:down Plxnd1,67784:up Pdgfc,54635:down Dpysl3,22240:down Mgp,17313:up Srxp2,68792:down Gpm6b,14758:up Vegfa,22339:down Cbr2,12409:up Serpine2,20720:up Tnf,21926:up Plk2,20620:down Col1a2,12843:down Cd24a,12484:down Hmox1,15368:up Has2,15117:down Ncam1,17967:down C1qtnf3,81799:down Wnt5a,22418:down Tgfb3,21814:up C1qtnf6,72709:down Grem1,23892:up Adipoq,11450:up Sdf2l1,64136:up Thbs2,21826:down |
| proteolysis involved in cellular protein catabolic process                 | GO:0051603 | 9.93E-01 | 1.00E+00 | Uchl5,56207:up Plk2,20620:down Sdf2l1,64136:up Adamts12,239337:down                                                                                                                                                                                                                                                                                                                                                                                       |
| cellular macromolecule catabolic process                                   | GO:0044265 | 9.93E-01 | 1.00E+00 | Uchl5,56207:up Plk2,20620:down Sdf2l1,64136:up Hpse,15442:up lgfbp3,16009:up Adamts12,239337:down                                                                                                                                                                                                                                                                                                                                                         |
| ubiquitin-dependent protein catabolic process                              | GO:0006511 | 9.93E-01 | 1.00E+00 | Uchl5,56207:up Plk2,20620:down Sdf2l1,64136:up                                                                                                                                                                                                                                                                                                                                                                                                            |
| modification-dependent protein catabolic process                           | GO:0019941 | 9.94E-01 | 1.00E+00 | Uchl5,56207:up Plk2,20620:down Sdf2l1,64136:up                                                                                                                                                                                                                                                                                                                                                                                                            |
| modification-dependent macromolecule catabolic process                     | GO:0043632 | 9.95E-01 | 1.00E+00 | Uchl5,56207:up Plk2,20620:down Sdf2l1,64136:up                                                                                                                                                                                                                                                                                                                                                                                                            |
| microtubule cytoskeleton organization                                      | GO:0000226 | 9.95E-01 | 1.00E+00 | Plk2,20620:down Mark1,226778:up                                                                                                                                                                                                                                                                                                                                                                                                                           |
| cellular protein catabolic process                                         | GO:0044257 | 9.95E-01 | 1.00E+00 | Uchl5,56207:up Plk2,20620:down Sdf2l1,64136:up Adamts12,239337:down                                                                                                                                                                                                                                                                                                                                                                                       |
| amide biosynthetic process                                                 | GO:0043604 | 9.95E-01 | 1.00E+00 | Ggt5,23887:up Tnf,21926:up Egfr,13649:down lgf1,16000:up                                                                                                                                                                                                                                                                                                                                                                                                  |
| protein ubiquitination                                                     | GO:0016567 | 9.96E-01 | 1.00E+00 | Neur13,214854:down Pdzn3,55983:down Nxn,18230:down                                                                                                                                                                                                                                                                                                                                                                                                        |
| translation                                                                | GO:0006412 | 9.96E-01 | 1.00E+00 | Tnf,21926:up Egfr,13649:down lgf1,16000:up                                                                                                                                                                                                                                                                                                                                                                                                                |
| covalent chromatin modification                                            | GO:0016569 | 9.97E-01 | 1.00E+00 | Loxl2,94352:down Vegfa,22339:down                                                                                                                                                                                                                                                                                                                                                                                                                         |
| protein modification by small protein conjugation or removal               | GO:0070647 | 9.98E-01 | 1.00E+00 | Uchl5,56207:up Neur13,214854:down Pdzn3,55983:down Nxn,18230:down                                                                                                                                                                                                                                                                                                                                                                                         |
| protein modification by small protein conjugation                          | GO:0032446 | 9.98E-01 | 1.00E+00 | Neur13,214854:down Pdzn3,55983:down Nxn,18230:down                                                                                                                                                                                                                                                                                                                                                                                                        |
| chromatin modification                                                     | GO:0016568 | 9.99E-01 | 1.00E+00 | Loxl2,94352:down Vegfa,22339:down                                                                                                                                                                                                                                                                                                                                                                                                                         |
| ncRNA metabolic process                                                    | GO:0034660 | 9.99E-01 | 1.00E+00 | lce1,218333:down                                                                                                                                                                                                                                                                                                                                                                                                                                          |
| organelle assembly                                                         | GO:0070925 | 9.99E-01 | 1.00E+00 | Tnf,21926:up Plk2,20620:down                                                                                                                                                                                                                                                                                                                                                                                                                              |
| chromatin organization                                                     | GO:0006325 | 9.99E-01 | 1.00E+00 | Loxl2,94352:down Vegfa,22339:down                                                                                                                                                                                                                                                                                                                                                                                                                         |
| microtubule-based process                                                  | GO:0007017 | #####    | 1.00E+00 | Plk2,20620:down Mark1,226778:up                                                                                                                                                                                                                                                                                                                                                                                                                           |

|                                          |            |       |          |                                                                                                                                                                                                                                                                                                                                                                                                                                            |
|------------------------------------------|------------|-------|----------|--------------------------------------------------------------------------------------------------------------------------------------------------------------------------------------------------------------------------------------------------------------------------------------------------------------------------------------------------------------------------------------------------------------------------------------------|
| cellular macromolecular complex assembly | GO:0034622 | ##### | 1.00E+00 | Ncam1,17967:down Tgfb3,21814:up Pdgfc,54635:down                                                                                                                                                                                                                                                                                                                                                                                           |
| single-organism organelle organization   | GO:1902589 | ##### | 1.00E+00 | Fam101b,76566:down Ptk7,71461:down Sfrp4,20379:up Dpysl3,22240:down Gpm6b,14758:up Shroom4,208431:down Plod2,26432:down Vegfa,22339:down Igf2,16002:up Tnf,21926:up Loxl2,94352:down Trf,22041:up Lmcd1,30937:up Plk2,20620:down Sfrp1,20377:up Mark1,226778:up Bmp4,12159:up Igf1,16000:up Tgfb2,21808:down Fgfr2,14183:up Syt13,80976:up                                                                                                 |
| chromosome organization                  | GO:0051276 | ##### | 1.00E+00 | Loxl2,94352:down Vegfa,22339:down                                                                                                                                                                                                                                                                                                                                                                                                          |
| RNA processing                           | GO:0006396 | ##### | 1.00E+00 | Egfr,13649:down                                                                                                                                                                                                                                                                                                                                                                                                                            |
| organelle organization                   | GO:0006996 | ##### | 1.00E+00 | Fam101b,76566:down Ptk7,71461:down Sfrp4,20379:up Ccl2,20296:up Dpysl3,22240:down Epas1,13819:up Gpm6b,14758:up Shroom4,208431:down Plod2,26432:down Vegfa,22339:down Serpine2,20720:up Igf2,16002:up Tnf,21926:up Loxl2,94352:down Plk2,20620:down Trf,22041:up Lmcd1,30937:up Cd24a,12484:down Sfrp1,20377:up Wnt5a,22418:down Ccl12,20293:up Mark1,226778:up Bmp4,12159:up Igf1,16000:up Tgfb2,21808:down Fgfr2,14183:up Syt13,80976:up |
